# Supplementary material for: Buffy Coat Transcriptomic Analysis Reveals Alterations in Host Cell Protein Synthesis and Cell Cycle in Severe COVID-19 Patients
Source: MDPI journal article supplement (doi:10.3390/ijms232113588), 2022-11-05
Supplement: s1 [file s1]

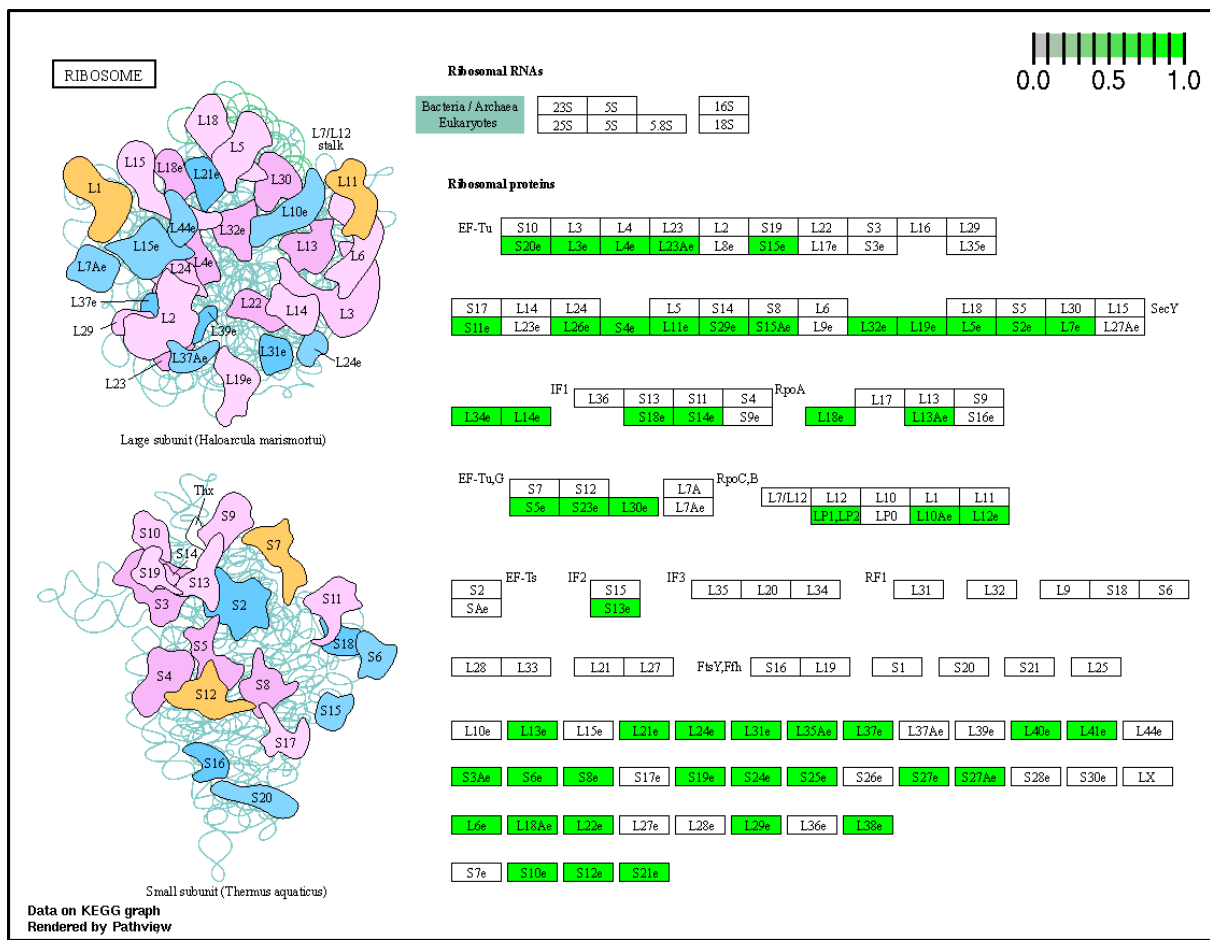

**Figure S1. KEGG ribosome pathway.** In green are the downregulated genes identified in the RNA-seq analysis.

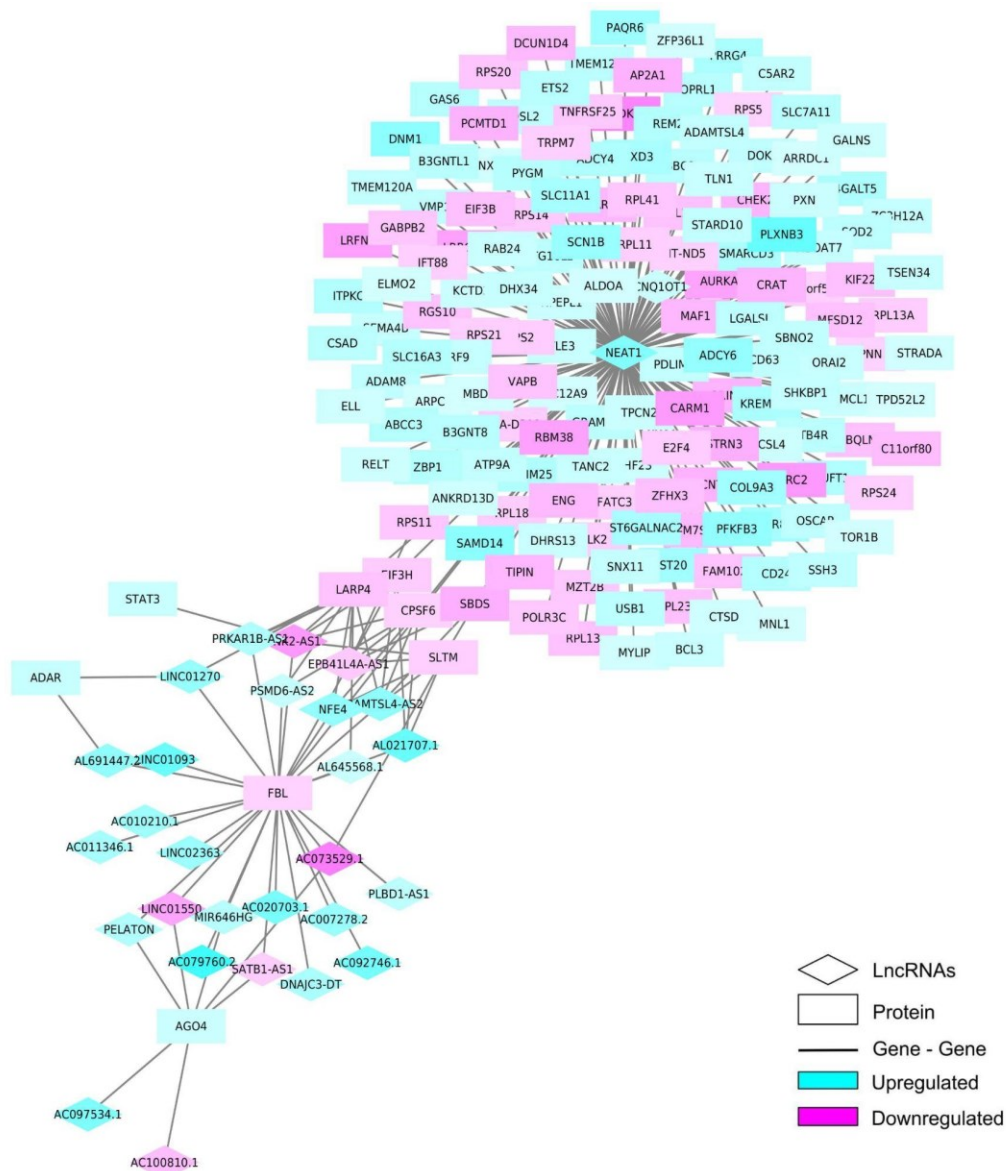

**Figure S2. Protein-coding lncRNAs interaction network.** This network was constructed with all differentially expressed genes that have a connection with differentially expressed protein-coding genes in the RNA-seq analysis.

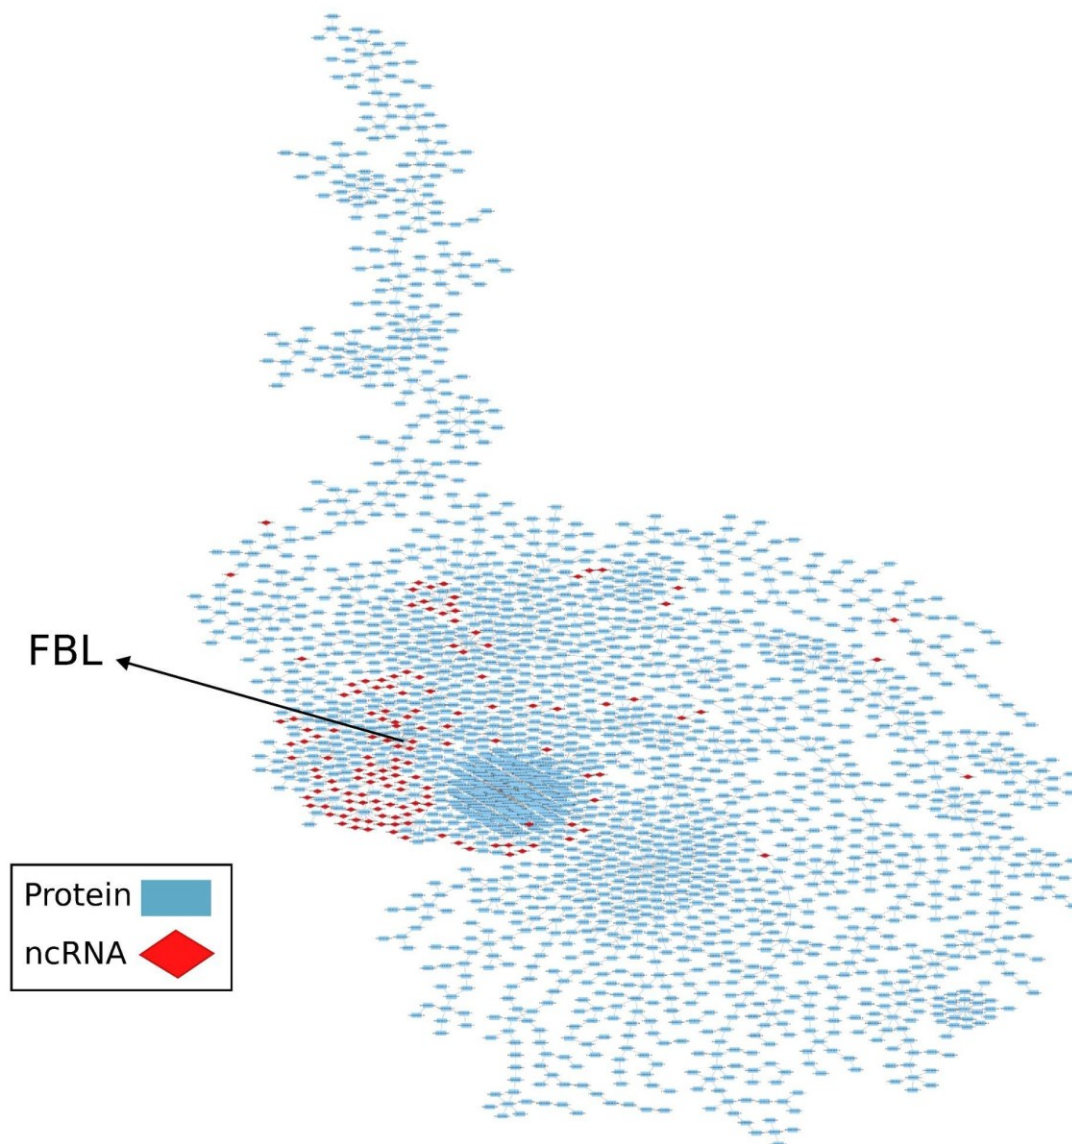

**Figure S3. FBL Interactive network all DEGs.** Interactive network of the FBL protein connected to all DEGs using the Dijkstra algorithm.

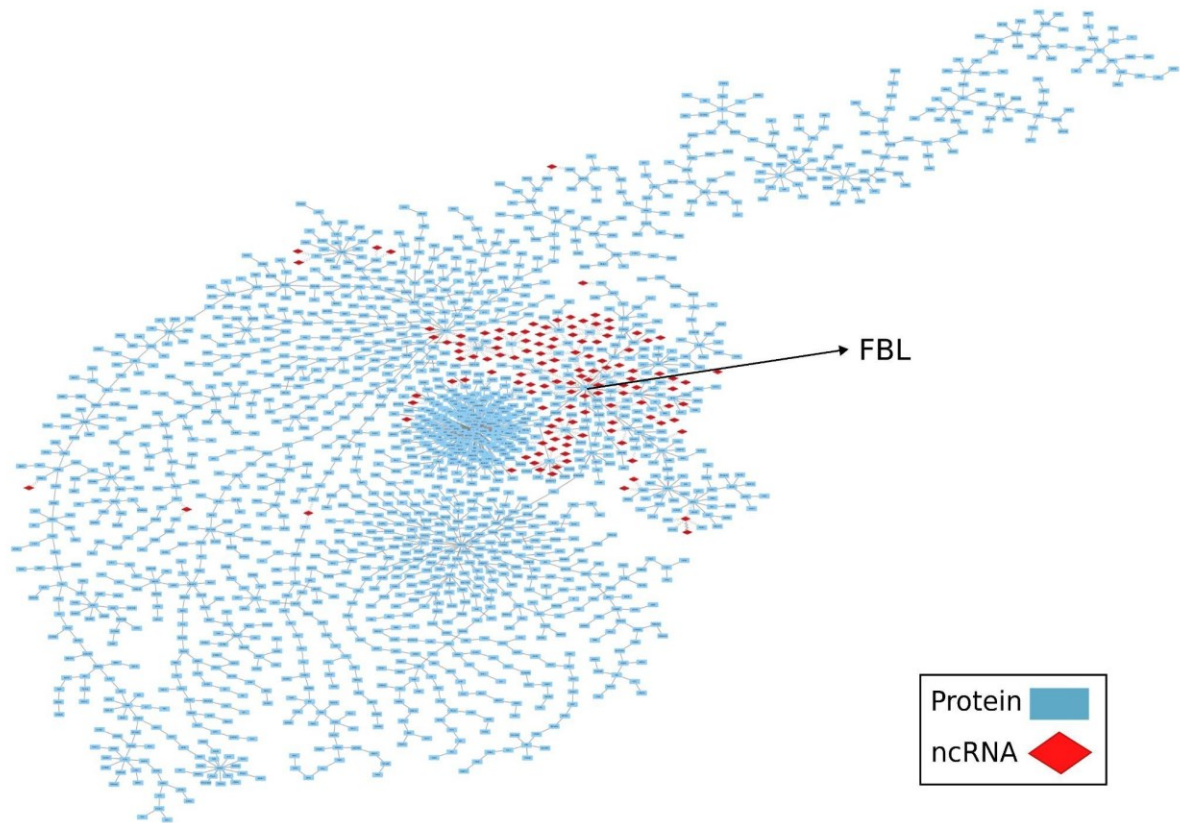

**Figure S4. FBL Interactive network upregulated DEGs.** Interactive network of the FBL protein connected to all upregulated DEGs using the Dijkstra algorithm.

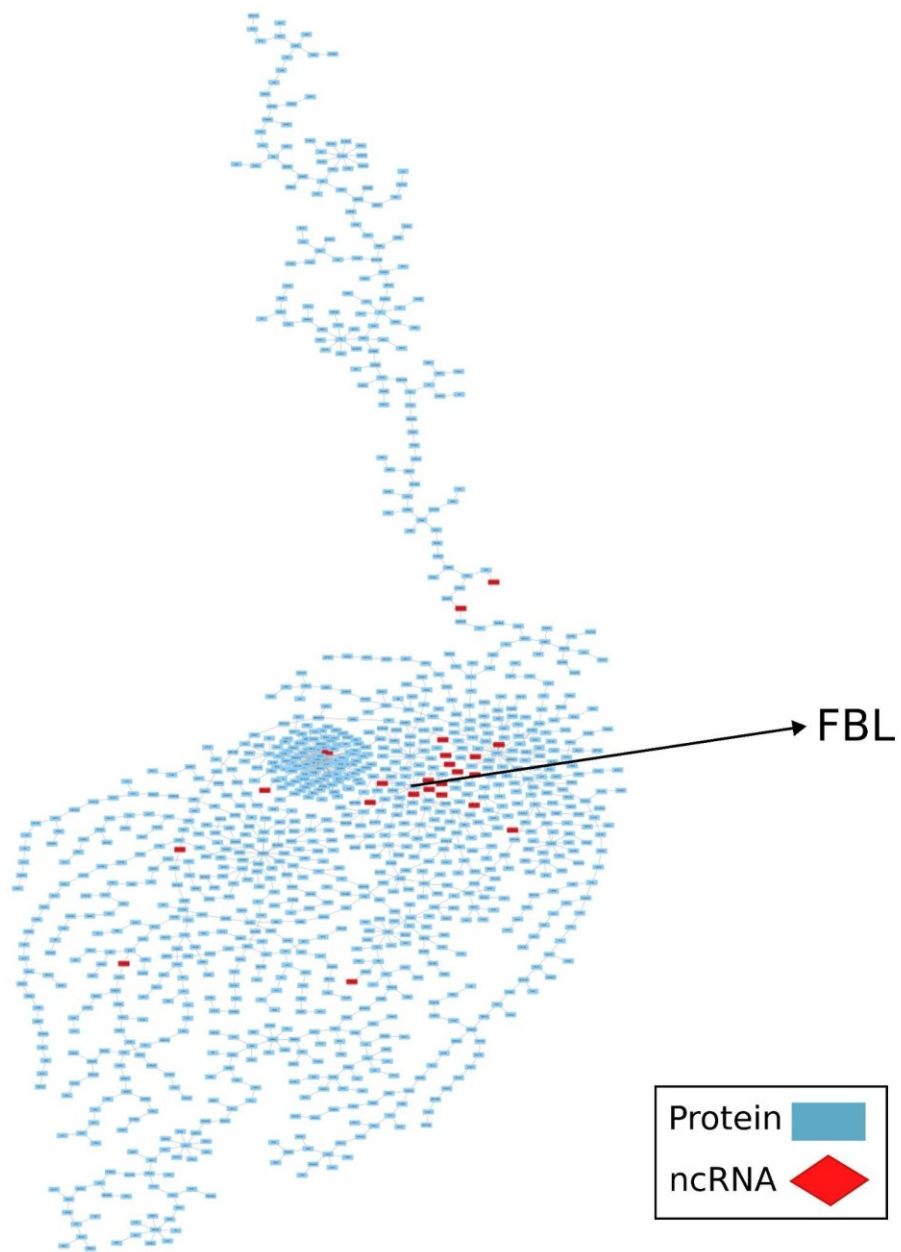

**Figure S5. FBL Interactive network downregulated DEGs.** Interactive network of the FBL protein connected to all downregulated DEGs using the Dijkstra algorithm.
