# Supplementary material for: Buffy Coat Transcriptomic Analysis Reveals Alterations in Host Cell Protein Synthesis and Cell Cycle in Severe COVID-19 Patients
Source: Int J Mol Sci. 2022 Nov 5;23(21):13588. doi: 10.3390/ijms232113588 (PMC9659271; doi:10.3390/ijms232113588)
Supplement: Supplementary file 1 [file ijms-23-13588-s001.zip]

Archive with 8 entries (8 files):
- Supplementary Figures.pdf
- Table S1.ods
- Table S2.ods
- Table S3.ods
- Table S4.ods
- Table S5.ods
- Table S6.ods
- Table S7.ods
