# Supplementary material for: Buffy Coat Transcriptomic Analysis Reveals Alterations in Host Cell Protein Synthesis and Cell Cycle in Severe COVID-19 Patients
Source: Int J Mol Sci. 2022 Nov 5;23(21):13588. doi: 10.3390/ijms232113588 (PMC9659271; doi:10.3390/ijms232113588)
Supplement: Supplementary file 1 [file ijms-23-13588-s001.zip › Table S1.ods]

## Sheet: Página1
Table S1. Patients metadata.
Name	Age	Gender (M/F/O)	Group	Code	Collection Date	Admitted to Hospital (DD/MM/YY)	Admission to COVID WARD (DD/MM/YY) if never transfered, list date of hospital admission	Day of intubation	Discharge (DD/MM/YY) If deceased, decease date	Admission (SOFA score)	Intubation (SOFA score)	Day before discharge/decease (SOFA score)	Decease (Y/N)	Viral load (copies/mL)
ID1	55	F	mild	TRC013L	21/05/2021	NA	NA	NA	NA	NA	NA	NA	N	4.58E+00
ID2	46	F	mild	TRC021L	18/03/2021	NA	NA	NA	NA	NA	NA	NA	N	NA*
ID3	62	M	mild	TRC024L	21/05/2021	NA	NA	NA	NA	NA	NA	NA	N	4.88E+01
ID4	48	M	mild	TRC025L	18/03/2021	NA	NA	NA	NA	NA	NA	NA	N	2.32E+01
ID5	53	F	mild	TRC027L	21/05/2021	NA	NA	NA	NA	NA	NA	NA	N	4.42E+00
ID6	54	M	sars	TRC007M	18/03/2021	15/03/2021	15/03/2021	NA	22/03/2021	2	NA	7	N	8.17E+00
ID7	70	F	sars	TRC010M	18/03/2021	15/03/2021	15/03/2021	NA	22/03/2021	2	NA	7	N	6.22E+03
ID8	66	M	sars	TRC016M	18/03/2021	15/03/2021	15/03/2021	NA	25/03/2021	1	NA	10	N	4.55E+04
ID9	66	F	sars	TRC004M	04/02/2021	27/01/2021	27/01/2021	NA	11/02/2021	1	NA	15	N	5.18E+03
ID10	56	F	sars	TRC005M	04/02/2021	30/01/2021	30/01/2021	NA	22/02/2021	2	NA	23	N	1.87E+02
ID11	66	M	sars	TRC023M	29/04/2021	23/04/2021	23/04/2021	NA	11/05/2021	2	NA	18	N	1.92E+02
ID12	52	M	sars	TRC011G	13/05/2021	10/05/2021	10/05/2021	10/05/2021	15/05/2021	4	4	15	Y	2.48E+06
ID13	63	F	sars	TRC006G	04/03/2021	01/03/2021	01/03/2021	13/03/2021	15/03/2021	1	6	12	Y	3.96E+04
ID14	53	F	sars	TRC012G	11/03/2021	02/03/2021	02/03/2021	05/03/2021	15/03/2021	2	6	13	Y	8.38E+03
ID15	60	M	sars	TRC008G	15/04/2021	09/04/2021	09/04/2021	14/04/2021	16/06/2021	3	6	11	Y	2.82E+02
ID16	72	F	sars	TRC009G	29/01/2021	23/01/2021	23/01/2021	25/01/2021	09/02/2021	3	5	10	Y	2.64E+05
ID17	69	M	sars	TRC001G	08/07/2021	27/06/2020	02/07/2019	15/07/2020	26/07/2020	1	9	10	Y	NA*
*It was not possible to evaluate the viral load by the time of sample collection
