# Supplementary material for: Buffy Coat Transcriptomic Analysis Reveals Alterations in Host Cell Protein Synthesis and Cell Cycle in Severe COVID-19 Patients
Source: Int J Mol Sci. 2022 Nov 5;23(21):13588. doi: 10.3390/ijms232113588 (PMC9659271; doi:10.3390/ijms232113588)
Supplement: Supplementary file 1 [file ijms-23-13588-s001.zip › Table S2.ods]

## Sheet: Table S2
Table S2. Centrality scores of the interactive network connecting FBL to all DEGs.
abundance	AverageShortestPathLength	BetweennessCentrality	ClosenessCentrality	ClusteringCoefficient	Eccentricity	EdgeCount	Gene name	Gene Type	Indegree	IsSingleNode	log2fc	name	NCBI Gene ID	NeighborhoodConnectivity	Outdegree	padj	PartnerOfMultiEdgedNodePairs	selected	SelfLoops	shared name	Stress
31.5422803823774	2.0	0.0	0.5	0.0	3	1	AL160272.1	lncRNA	0	false	2.48939677824555	ENSG00000284977		13.0	1	0.0199329752981146	0	false	0	ENSG00000284977	0
48.4562104661295	2.0	0.0	0.5	0.0	3	1	GTF2IP12	transcribed_unprocessed_pseudogene	0	false	1.76020773010642	ENSG00000283050	101926918	9.0	1	0.0434081040944998	0	false	0	ENSG00000283050	0
88.5566651968034	2.0	0.0	0.5	0.0	3	1	AC215522.2	lncRNA	0	false	1.56738284286564	ENSG00000282572		9.0	1	0.00418377821870628	0	false	0	ENSG00000282572	0
42.231501217105	2.0	0.0	0.5	0.0	3	1	NPTN-IT1	lncRNA	0	false	1.28045587321635	ENSG00000281183	101241892	7.0	1	0.0211610398309175	0	false	0	ENSG00000281183	0
154.156616310257	2.0	0.0	0.5	0.0	3	1	LINC01127	lncRNA	0	false	3.00561479068811	ENSG00000281162		13.0	1	5.95247765805504E-4	0	false	0	ENSG00000281162	0
451.032850357219	18.0	0.0	0.05555555555555555	0.0	35	1	TRAC	TR_C_gene	0	false	-1.13323947036153	ENSG00000277734		2.0	1	0.0432723082610508	0	false	0	ENSG00000277734	0
9.69939432569989	2.0	0.0	0.5	0.0	3	1	AC079174.2	lncRNA	0	false	2.57282546930792	ENSG00000277715		13.0	1	0.0443217016122529	0	false	0	ENSG00000277715	0
56.4111436474147	2.5	0.0	0.4	0.0	4	1	AL117335.1	lncRNA	0	false	1.68934455161231	ENSG00000276649		5.0	1	0.0065437783879744	0	false	0	ENSG00000276649	0
59.8296259556526	22.5	0.0	0.044444444444444446	0.0	44	1	DACH1	protein_coding	0	false	2.66981828928665	ENSG00000276644	1602	20.0	1	5.9741244942268E-4	0	false	0	ENSG00000276644	0
24.7689819180619	2.0	0.0	0.5	0.0	3	1	AL442125.1	lncRNA	0	false	2.32532535533355	ENSG00000276248		13.0	1	0.0132434291571657	0	false	0	ENSG00000276248	0
102.833268971126	2.0	0.0	0.5	0.0	3	1	TUBGCP5	protein_coding	0	false	-1.4638146545335	ENSG00000275835	114791	293.0	1	0.00486321488350152	0	false	0	ENSG00000275835	0
21.2119950806385	7.5	0.0	0.13333333333333333	0.0	14	1	FCGBP	protein_coding	0	false	-2.40016687633903	ENSG00000275395	8857	4.0	1	0.0173597857917845	0	false	0	ENSG00000275395	0
74.2286898568291	2.0	0.0	0.5	0.0	3	1	H2AC15	protein_coding	0	false	-1.30348789478256	ENSG00000275221	8330	293.0	1	0.0122106623654058	0	false	0	ENSG00000275221	0
100.198078268832	2.0	0.0	0.5	0.0	3	1	RN7SL600P	misc_RNA	0	false	2.36878844160232	ENSG00000274963		14.0	1	0.0040432485656312	0	false	0	ENSG00000274963	0
2781.96931945013	2.0	0.0	0.5	0.0	3	1	MIR223HG	lncRNA	0	false	2.48710188354872	ENSG00000274536	115891964	14.0	1	0.00208685721667894	0	false	0	ENSG00000274536	0
44.4438387447647	2.0	0.0	0.5	0.0	3	1	AL035661.1	lncRNA	0	false	3.04973314161289	ENSG00000274173		13.0	1	0.0110448042869144	0	false	0	ENSG00000274173	0
147.59477073468	2.0	0.0	0.5	0.0	3	1	RAB33B-AS1	lncRNA	0	false	1.36308748047344	ENSG00000273247		11.0	1	0.0145424810093855	0	false	0	ENSG00000273247	0
132.294745182229	2.0	0.0	0.5	0.0	3	1	LINC02035	lncRNA	0	false	1.23967570908496	ENSG00000273033	100129550	2.0	1	0.0269001457503647	0	false	0	ENSG00000273033	0
113.651112011098	4.5	0.0	0.2222222222222222	0.0	8	1	AC083862.1	lncRNA	0	false	2.0632800535258	ENSG00000272941		4.0	1	6.47162027827495E-4	0	false	0	ENSG00000272941	0
28.5438280873457	2.0	0.0	0.5	0.0	3	1	AL021707.6	lncRNA	0	false	2.54025221534284	ENSG00000272669		7.0	1	0.0194143050328819	0	false	0	ENSG00000272669	0
223.137120241942	19.0	0.0	0.05263157894736842	0.0	37	1	CD24	protein_coding	0	false	1.71351935826976	ENSG00000272398	100133941	2.0	1	0.0485827623415609	0	false	0	ENSG00000272398	0
16.3968871137459	2.0	0.0	0.5	0.0	3	1	AC005072.1	lncRNA	0	false	2.64570062349347	ENSG00000272219		2.0	1	0.00705314577595528	0	false	0	ENSG00000272219	0
25.2997022790276	1.0	0.0	1.0	0.0	1	1	AC136475.9	lncRNA	0	false	3.95073008149585	ENSG00000270972		31.0	1	0.00493600549344736	0	false	0	ENSG00000270972	0
136.369094558016	2.5	0.0	0.4	0.0	4	1	NBPF14	protein_coding	0	false	1.12355980833659	ENSG00000270629	25832	2.0	1	0.00401897174509924	0	false	0	ENSG00000270629	0
46.2389305336701	2.5	0.0	0.4	0.0	4	1	AC010680.2	lncRNA	0	false	2.00063433174632	ENSG00000270574		2.0	1	0.0165453737351892	0	false	0	ENSG00000270574	0
31.1599320031676	2.5	0.0	0.4	0.0	4	1	AC099343.2	lncRNA	0	false	2.25445568756602	ENSG00000270426		2.0	1	0.0152123557196103	0	false	0	ENSG00000270426	0
66.2966887197016	2.0	0.0	0.5	0.0	3	1	AC009948.1	lncRNA	0	false	1.92673710235592	ENSG00000270277		3.0	1	0.0241756278063854	0	false	0	ENSG00000270277	0
7.68378113368875	2.0	0.0	0.5	0.0	3	1	AC104695.2	lncRNA	0	false	3.4510004261372	ENSG00000270210		2.0	1	0.0135951786325643	0	false	0	ENSG00000270210	0
86.9498002706304	2.0	0.0	0.5	0.0	3	1	KCNQ1OT1	lncRNA	0	false	1.20695700127562	ENSG00000269821	10984	25.0	1	0.016793143681884	0	false	0	ENSG00000269821	0
523.468640450578	3.0	0.0	0.3333333333333333	0.0	5	1	MIR23AHG	lncRNA	0	false	1.29378986222919	ENSG00000267519		15.0	1	0.0228376047131683	0	false	0	ENSG00000267519	0
167.605032603382	2.0	0.0	0.5	0.0	3	1	SNHG22	lncRNA	0	false	-1.24658663146871	ENSG00000267322		293.0	1	0.0419788580739595	0	false	0	ENSG00000267322	0
15.9068508927475	2.0	0.0	0.5	0.0	3	1	AC138150.2	lncRNA	0	false	2.65634585028031	ENSG00000267288	105371795	7.0	1	0.0498978086424771	0	false	0	ENSG00000267288	0
29.6856896586467	1.5	0.0	0.6666666666666666	0.0	2	1	AC005306.1	lncRNA	0	false	1.80509794510866	ENSG00000267283		11.0	1	0.016713269364977	0	false	0	ENSG00000267283	0
55.9557933143117	1.5	0.0	0.6666666666666666	0.0	2	1	AC011472.2	lncRNA	0	false	2.08826486610204	ENSG00000267174		11.0	1	0.040110457433504	0	false	0	ENSG00000267174	0
159.703839497773	3.0	0.0	0.3333333333333333	0.0	5	1	FMNL1-DT	lncRNA	0	false	1.18844188303414	ENSG00000267121	339192	15.0	1	0.0201362471286569	0	false	0	ENSG00000267121	0
12.0686953596339	2.0	0.0	0.5	0.0	3	1	AC087289.1	lncRNA	0	false	3.32505533201459	ENSG00000266980		7.0	1	0.0120076941797914	0	false	0	ENSG00000266980	0
117.920100860989	4.0	0.0	0.25	0.0	7	1	STRADA	protein_coding	0	false	1.0593834020628	ENSG00000266173	92335	2.0	1	0.0231884927117477	0	false	0	ENSG00000266173	0
70.7858831797878	2.0	0.0	0.5	0.0	3	1	AC104564.5	lncRNA	0	false	1.72736074194017	ENSG00000265625		2.0	1	0.0243833782348996	0	false	0	ENSG00000265625	0
170.718862242798	3.0	0.0	0.3333333333333333	0.0	5	1	AC004687.1	lncRNA	0	false	1.45398506593398	ENSG00000265206		15.0	1	0.0105560794819681	0	false	0	ENSG00000265206	0
102.695638310169	12.0	0.0	0.08333333333333333	0.0	23	1	AC011933.2	lncRNA	0	false	1.34140384976815	ENSG00000264853		2.0	1	0.0148724516844125	0	false	0	ENSG00000264853	0
51.0104932919701	2.0	0.0	0.5	0.0	3	1	MMP25-AS1	lncRNA	0	false	1.58859228579975	ENSG00000261971		4.0	1	0.0106634885186351	0	false	0	ENSG00000261971	0
215.22394945078	2.0	0.0	0.5	0.0	3	1	H2BC20P	transcribed_unprocessed_pseudogene	0	false	1.43343405817414	ENSG00000261716	337873	4.0	1	0.0384316918342567	0	false	0	ENSG00000261716	0
51.4607571695768	2.0	0.0	0.5	0.0	3	1	AC005632.3	lncRNA	0	false	1.78827798798584	ENSG00000261596		3.0	1	0.0199089240218491	0	false	0	ENSG00000261596	0
13.4612892490543	2.5	0.0	0.4	0.0	4	1	AC092368.3	lncRNA	0	false	2.08575852018606	ENSG00000261512		2.0	1	0.0381464811315356	0	false	0	ENSG00000261512	0
22.3752924259065	2.0	0.0	0.5	0.0	3	1	AC104964.2	lncRNA	0	false	1.73252512981278	ENSG00000261451		13.0	1	0.0122106623654058	0	false	0	ENSG00000261451	0
358.241361641201	17.0	0.0	0.058823529411764705	0.0	33	1	CCPG1	protein_coding	0	false	1.23107882057714	ENSG00000260916	9236	3.0	1	0.0156998156011272	0	false	0	ENSG00000260916	0
640.178674317108	4.0	0.0	0.25	0.0	7	1	AC130456.3	lncRNA	0	false	-2.14584512278371	ENSG00000260592		4.0	1	0.0101101130496421	0	false	0	ENSG00000260592	0
179.145045885021	1.5	0.0	0.6666666666666666	0.0	2	1	FAM157C	lncRNA	0	false	1.59133080619915	ENSG00000260528		11.0	1	4.95354088614978E-4	0	false	0	ENSG00000260528	0
38.418467546761	2.0	0.0	0.5	0.0	3	1	MTCYBP23	processed_pseudogene	0	false	2.46999541604415	ENSG00000259671		14.0	1	0.00693853419502472	0	false	0	ENSG00000259671	0
55.9380889559232	2.0	0.0	0.5	0.0	3	1	AC066616.2	processed_pseudogene	0	false	2.04421143583474	ENSG00000259600		14.0	1	0.0329468828730239	0	false	0	ENSG00000259600	0
29.3010775383697	2.0	0.0	0.5	0.0	3	1	AC087286.4	lncRNA	0	false	1.68130293490765	ENSG00000259453		7.0	1	0.0211645580212597	0	false	0	ENSG00000259453	0
53.6774243211667	2.0	0.0	0.5	0.0	3	1	MTND5P32	processed_pseudogene	0	false	2.07614986141097	ENSG00000259379		13.0	1	0.0229658805741733	0	false	0	ENSG00000259379	0
19.4669833026236	2.0	0.0	0.5	0.0	3	1	TMC3-AS1	lncRNA	0	false	2.18634500609385	ENSG00000259343		3.0	1	0.0136659725748713	0	false	0	ENSG00000259343	0
2049.55555780911	12.5	0.03236021630449749	0.08	0.0	24	2	PECAM1	protein_coding	1	false	0.317093656330238	ENSG00000261371	5175	2.0	1	0.664810315566428	0	false	0	ENSG00000261371	190848
125.284661366007	2.5	0.0	0.4	0.0	4	1	LINC02289	lncRNA	0	false	2.983996904319	ENSG00000258819	102724190	5.0	1	0.0368663319058158	0	false	0	ENSG00000258819	0
19.9083823855788	2.0	0.0	0.5	0.0	3	1	AC135626.1	processed_pseudogene	0	false	2.66102423285178	ENSG00000258632		14.0	1	0.0096033494006947	0	false	0	ENSG00000258632	0
165.001618087273	2.0	0.0	0.5	0.0	3	1	LINC02207	lncRNA	0	false	4.27661000274089	ENSG00000258476		14.0	1	7.81491941266996E-5	0	false	0	ENSG00000258476	0
75.9982814353024	6.5	0.0	0.15384615384615385	0.0	12	1	CLEC5A	protein_coding	0	false	1.37845781009257	ENSG00000258227	23601	2.0	1	0.0301637555101899	0	false	0	ENSG00000258227	0
214.09584402064	1.5	0.0	0.6666666666666666	0.0	2	1	MGAM2	protein_coding	0	false	3.78442226143018	ENSG00000257743	93432	2.0	1	9.11745364056333E-5	0	false	0	ENSG00000257743	0
4010.27181018451	2.5	0.0	0.4	0.0	4	1	MGAM	protein_coding	0	false	2.90712060722042	ENSG00000257335	8972	3.0	1	4.67460843070856E-4	0	false	0	ENSG00000257335	0
112.512185849056	7.5	0.0	0.13333333333333333	0.0	14	1	HP	protein_coding	0	false	2.73815628545234	ENSG00000257017	3240	2.0	1	0.0102403783014738	0	false	0	ENSG00000257017	0
84.6788343143877	2.5	0.0	0.4	0.0	4	1	PLBD1-AS1	lncRNA	0	false	1.50086962321334	ENSG00000256751	101928290	2.0	1	0.0390786952086425	0	false	0	ENSG00000256751	0
47.5546510896022	16.5	0.0	0.06060606060606061	0.0	32	1	CLEC12B	protein_coding	0	false	2.10642576778036	ENSG00000256660	387837	3.0	1	0.0386954107874484	0	false	0	ENSG00000256660	0
16.559650883155	2.0	0.0	0.5	0.0	3	1	AC005840.2	lncRNA	0	false	2.86129991510808	ENSG00000256433		7.0	1	0.0228172682212656	0	false	0	ENSG00000256433	0
228.337927690096	5.5	0.0	0.18181818181818182	0.0	10	1	SMIM3	protein_coding	0	false	1.17993422426856	ENSG00000256235	85027	2.0	1	0.0218333481240039	0	false	0	ENSG00000256235	0
167.248153567856	1.0	0.0	1.0	0.0	1	1	AC092746.1	lncRNA	0	false	3.14919959064967	ENSG00000255801		31.0	1	0.0470381193955172	0	false	0	ENSG00000255801	0
67.7356863912368	5.5	0.0	0.18181818181818182	0.0	10	1	EBLN2	protein_coding	0	false	1.67569859578019	ENSG00000255423	55096	2.0	1	0.0113743417650853	0	false	0	ENSG00000255423	0
44.3557998598289	2.0	0.0	0.5	0.0	3	1	AC136475.5	lncRNA	0	false	4.14278217435547	ENSG00000255328		3.0	1	0.00214192471626862	0	false	0	ENSG00000255328	0
46.4260885115728	31.0	0.0	0.03225806451612903	0.0	61	1	CARD17	protein_coding	0	false	3.29513755439811	ENSG00000255221	440068	5.0	1	0.0304094134914215	0	false	0	ENSG00000255221	0
98.8235352840215	1.5	0.0	0.6666666666666666	0.0	2	1	AP002807.1	lncRNA	0	false	1.90335071395801	ENSG00000255031		11.0	1	3.09759819441595E-4	0	false	0	ENSG00000255031	0
1587.4803493358	2.0	0.0	0.5	0.0	3	1	AP5B1	protein_coding	0	false	1.32067688011949	ENSG00000254470	91056	293.0	1	0.00315711932395819	0	false	0	ENSG00000254470	0
101.028430911662	4.5	0.0	0.2222222222222222	0.0	8	1	AC018607.1	lncRNA	0	false	1.67851546845867	ENSG00000254325		4.0	1	0.0208359926256166	0	false	0	ENSG00000254325	0
248.865296694964	9.0	0.0	0.1111111111111111	0.0	17	1	CLN8-AS1	lncRNA	0	false	-1.48406085155169	ENSG00000253982	101927752	2.0	1	0.0418801334971289	0	false	0	ENSG00000253982	0
10.3751232778609	2.0	0.0	0.5	0.0	3	1	AC011676.1	lncRNA	0	false	2.59794633207903	ENSG00000253307		3.0	1	0.0242518789830316	0	false	0	ENSG00000253307	0
39.0056059227759	2.5	0.0	0.4	0.0	4	1	DENND3-AS1	lncRNA	0	false	1.85156002838881	ENSG00000253210	101927963	2.0	1	0.00146651965977734	0	false	0	ENSG00000253210	0
9.80714826449649	2.0	0.0	0.5	0.0	3	1	AC113398.2	lncRNA	0	false	3.94598657029391	ENSG00000251456		14.0	1	0.0221081864275817	0	false	0	ENSG00000251456	0
50.00934266249	2.0	0.0	0.5	0.0	3	1	GOLGA5P1	processed_pseudogene	0	false	1.7485775646999	ENSG00000251215		14.0	1	0.00991041972179548	0	false	0	ENSG00000251215	0
52.9084849743628	2.5	0.0	0.4	0.0	4	1	NUDT16-DT	lncRNA	0	false	2.20142653379425	ENSG00000250608	339874	4.0	1	0.00879935492137732	0	false	0	ENSG00000250608	0
39.7651081764956	1.5	0.0	0.6666666666666666	0.0	2	1	SCARNA22	scaRNA	0	false	1.95795934402854	ENSG00000249784	677770	18.0	1	0.0498174031771445	0	false	0	ENSG00000249784	0
422.198043874645	20.0	0.0	0.05	0.0	39	1	NAIP	protein_coding	0	false	1.81033403100301	ENSG00000249437	4671	2.0	1	0.00214668065032925	0	false	0	ENSG00000249437	0
37.6922072620894	2.0	0.0	0.5	0.0	3	1	AC020703.1	lncRNA	0	false	3.08006761912688	ENSG00000249309		14.0	1	0.00442609938366599	0	false	0	ENSG00000249309	0
9.72484802420963	1.5	0.0	0.6666666666666666	0.0	2	1	LINC01088	lncRNA	0	false	-2.3693913880195	ENSG00000249307	100505875	11.0	1	0.0489256885395546	0	false	0	ENSG00000249307	0
19.0460845580683	1.0	0.0	1.0	0.0	1	1	LINC01093	lncRNA	0	false	3.43228922727392	ENSG00000249173	100506229	31.0	1	0.0245915601342422	0	false	0	ENSG00000249173	0
112.324201456325	2.0	0.0	0.5	0.0	3	1	SLED1	transcribed_processed_pseudogene	0	false	2.86368310802262	ENSG00000249138	643036	14.0	1	1.68220892051604E-4	0	false	0	ENSG00000249138	0
75.4249295601218	2.5	0.0	0.4	0.0	4	1	LINC02362	lncRNA	0	false	2.05898859081993	ENSG00000249096		4.0	1	0.0135788756324186	0	false	0	ENSG00000249096	0
34.272441951451	2.0	0.0	0.5	0.0	3	1	AC097534.1	lncRNA	0	false	2.90015018992494	ENSG00000248774		13.0	1	1.92476760923246E-4	0	false	0	ENSG00000248774	0
20.598762317402	2.5	0.0	0.4	0.0	4	1	AC105415.1	lncRNA	0	false	2.29163170846665	ENSG00000248516		2.0	1	0.0254223086406246	0	false	0	ENSG00000248516	0
56.2537109293168	1.5	0.0	0.6666666666666666	0.0	2	1	GASK1B-AS1	lncRNA	0	false	1.42833916662016	ENSG00000248429	285505	11.0	1	0.0323563181684178	0	false	0	ENSG00000248429	0
1355.11364679853	2.0	0.0	0.5	0.0	3	1	LUCAT1	lncRNA	0	false	1.79372065393531	ENSG00000248323	100505994	2.0	1	0.0287153277365042	0	false	0	ENSG00000248323	0
69.9457707506772	2.5	0.0	0.4	0.0	4	1	RRN3P1	transcribed_unprocessed_pseudogene	0	false	-1.17934706462527	ENSG00000248124		4.0	1	0.0244891234798127	0	false	0	ENSG00000248124	0
39.8820691500754	2.0	0.0	0.5	0.0	3	1	DNAJC3-DT	lncRNA	0	false	1.89445179095738	ENSG00000247400	100289274	2.0	1	0.00375607827092526	0	false	0	ENSG00000247400	0
15.9575307224845	2.5	0.0	0.4	0.0	4	1	PRKCH-AS1	lncRNA	0	false	-2.21435760888927	ENSG00000247287		5.0	1	0.0339705880527506	0	false	0	ENSG00000247287	0
31.800831105975	2.0	0.0	0.5	0.0	3	1	FBXO38-DT	lncRNA	0	false	2.01380796942912	ENSG00000247199	102546294	13.0	1	0.0344705926078376	0	false	0	ENSG00000247199	0
152.615822885494	4.0	0.0	0.25	0.0	7	1	UBR5-DT	lncRNA	0	false	1.98661137883242	ENSG00000246263		4.0	1	0.00885975098298248	0	false	0	ENSG00000246263	0
21.9314891028217	2.0	0.0	0.5	0.0	3	1	LINC01550	lncRNA	0	false	-2.09646978451337	ENSG00000246223	388011	13.0	1	0.0100142111177391	0	false	0	ENSG00000246223	0
47.3984629623601	2.5	0.0	0.4	0.0	4	1	NUDT16L2P	transcribed_unitary_pseudogene	0	false	1.57008149466276	ENSG00000246082	152195	2.0	1	0.0455062614274133	0	false	0	ENSG00000246082	0
177.292418604214	3.0	0.0	0.3333333333333333	0.0	5	1	AP000787.1	lncRNA	0	false	-2.11619642075402	ENSG00000245552	101929295	15.0	1	0.0373095666355269	0	false	0	ENSG00000245552	0
61.394345141683	2.0	0.0	0.5	0.0	3	1	TPTEP2	transcribed_unprocessed_pseudogene	0	false	1.3100976881623	ENSG00000244627		5.0	1	0.0123207535003346	0	false	0	ENSG00000244627	0
77.4954849028142	12.0	0.0	0.08333333333333333	0.0	23	1	ASPRV1	protein_coding	0	false	2.0977009101972	ENSG00000244617	151516	2.0	1	0.00693043043322125	0	false	0	ENSG00000244617	0
608.360127587666	5.0	0.0	0.2	0.0	9	1	LILRA6	protein_coding	0	false	1.6468381245703	ENSG00000244482	79168	2.0	1	0.00163506235890871	0	false	0	ENSG00000244482	0
557.198267347501	12.0	0.04028189714752344	0.08333333333333333	0.0	23	2	RBM12	protein_coding	1	false	0.270308510746834	ENSG00000244462	10137	2.0	1	0.359766046838428	0	false	0	ENSG00000244462	237567
9.90833171772838	2.0	0.0	0.5	0.0	3	1	AC116533.1	processed_pseudogene	0	false	-2.04407028518364	ENSG00000244398		2.0	1	0.0157389215132769	0	false	0	ENSG00000244398	0
13.6416192111059	4.5	0.0	0.2222222222222222	0.0	8	1	IGKV2D-29	IG_V_gene	0	false	3.44434550199436	ENSG00000243264		2.0	1	0.0350603900505586	0	false	0	ENSG00000243264	0
7.96259067972799	2.0	0.0	0.5	0.0	3	1	AC079760.2	lncRNA	0	false	4.37669630773232	ENSG00000243144		2.0	1	0.0458522065825738	0	false	0	ENSG00000243144	0
185.846385967413	11.0	0.05335447635415826	0.09090909090909091	0.0	21	2	CORO7	protein_coding	1	false	0.397434915137315	ENSG00000262246	79585	2.5	1	0.510362546252375	0	false	0	ENSG00000262246	314664
9.73730024242322	11.5	0.04722216381816912	0.08695652173913043	0.0	22	2	CNTF	protein_coding	1	false	0.608317648810037	ENSG00000242689	1270	2.0	1	0.665733647085803	0	false	0	ENSG00000242689	278498
16.435304145451	2.0	0.0	0.5	0.0	3	1	RN7SL683P	misc_RNA	0	false	2.99721004155058	ENSG00000242330		9.0	1	0.0298004254779924	0	false	0	ENSG00000242330	0
71.147878797725	2.0	0.0	0.5	0.0	3	1	FOXP1-IT1	lncRNA	0	false	1.47794886550508	ENSG00000242094		3.0	1	0.0102403783014738	0	false	0	ENSG00000242094	0
46.8303342070397	3.0	0.0	0.3333333333333333	0.0	5	1	AC112496.1	lncRNA	0	false	2.154446779254	ENSG00000241886		15.0	1	0.00394195710696174	0	false	0	ENSG00000241886	0
620.86760287645	14.5	0.0	0.06896551724137931	0.0	28	1	PISD	protein_coding	0	false	1.62332064571248	ENSG00000241878	23761	6.0	1	0.00879935492137732	0	false	0	ENSG00000241878	0
8.46258377715322	2.0	0.0	0.5	0.0	3	1	RN7SL494P	misc_RNA	0	false	-2.13095154125889	ENSG00000241175		13.0	1	0.0479921555530192	0	false	0	ENSG00000241175	0
19.9764179499879	2.5	0.006956035764984201	0.4	0.0	4	2	YAE1	protein_coding	1	false	-0.220152854098951	ENSG00000241127	57002	5.5	1	0.856197398622809	0	false	0	ENSG00000241127	41024
147.432173584342	22.0	0.0	0.045454545454545456	0.0	43	1	NSUN6	protein_coding	0	false	-1.05233913022563	ENSG00000241058	221078	2.0	1	0.0372556844141655	0	false	0	ENSG00000241058	0
22.5380072987363	2.0	0.0	0.5	0.0	3	1	RN7SL288P	misc_RNA	0	false	1.73208790430278	ENSG00000240767		14.0	1	0.0315056232536342	0	false	0	ENSG00000240767	0
35.8309178666958	2.0	0.0	0.5	0.0	3	1	RPL21P123	transcribed_processed_pseudogene	0	false	1.45932613374163	ENSG00000240531		13.0	1	0.0482056529651074	0	false	0	ENSG00000240531	0
199.506540825999	2.0	0.0	0.5	0.0	3	1	AL157392.3	lncRNA	0	false	1.11405239127208	ENSG00000239665		5.0	1	0.0407797657877782	0	false	0	ENSG00000239665	0
133.938395902137	2.0	0.0	0.5	0.0	3	1	PSMD6-AS2	lncRNA	0	false	1.27399760742692	ENSG00000239653	100507062	11.0	1	0.0454335373688422	0	false	0	ENSG00000239653	0
137.071502700928	2.0	0.0	0.5	0.0	3	1	LINC01410	lncRNA	0	false	1.87653916363592	ENSG00000238113	103352539	3.0	1	0.0065437783879744	0	false	0	ENSG00000238113	0
69.2501784199609	2.0	0.0	0.5	0.0	3	1	AL391832.2	lncRNA	0	false	2.69889454311572	ENSG00000238005	101927851	3.0	1	0.00226863968664228	0	false	0	ENSG00000238005	0
32.1726778874837	2.5	0.0	0.4	0.0	4	1	KLF7-IT1	lncRNA	0	false	1.56383584351457	ENSG00000237892		5.0	1	0.0413642979794121	0	false	0	ENSG00000237892	0
107.024272009348	2.0	0.0	0.5	0.0	3	1	LINC00211	lncRNA	0	false	2.03861778436407	ENSG00000237803	101929559	4.0	1	0.0256031551930969	0	false	0	ENSG00000237803	0
42.6101036505374	2.5	0.049274859044643834	0.4	0.0	4	2	HLA-DQA2	protein_coding	1	false	-1.69169155790126	ENSG00000237541	3117	14.0	1	0.468837690782827	0	false	0	ENSG00000237541	290604
516.53330371207	28.5	0.0	0.03508771929824561	0.0	56	1	RGL2	protein_coding	0	false	1.28860820042925	ENSG00000237441	5863	2.0	1	0.00523310118553799	0	false	0	ENSG00000237441	0
569.393417244431	3.0	0.0	0.3333333333333333	0.0	5	1	TTN-AS1	lncRNA	0	false	1.43432932748849	ENSG00000237298		15.0	1	0.00208685721667894	0	false	0	ENSG00000237298	0
29.1286356465999	2.0	0.0	0.5	0.0	3	1	DDX10P1	processed_pseudogene	0	false	2.05414964578812	ENSG00000237135		13.0	1	0.0446845592940242	0	false	0	ENSG00000237135	0
134.258301352218	1.0	0.0	1.0	0.0	1	1	AC007278.2	lncRNA	0	false	2.33861203047299	ENSG00000236525		31.0	1	0.00868562414213698	0	false	0	ENSG00000236525	0
134.041331852483	3.0	0.0	0.3333333333333333	0.0	5	1	FAM157A	transcribed_unprocessed_pseudogene	0	false	1.94191476443297	ENSG00000236438	728262	15.0	1	1.08494960025683E-4	0	false	0	ENSG00000236438	0
19.1627464555394	8.5	0.0	0.11764705882352941	0.0	16	1	CLEC2L	protein_coding	0	false	2.33736209476073	ENSG00000236279	154790	2.0	1	0.0379715495415313	0	false	0	ENSG00000236279	0
108.910501205352	2.0	0.0	0.5	0.0	3	1	AC099811.1	lncRNA	0	false	1.84321019192873	ENSG00000236194		4.0	1	0.0022596291217227	0	false	0	ENSG00000236194	0
25.8962772925325	2.0	0.0	0.5	0.0	3	1	LINC01814	lncRNA	0	false	2.62171772995664	ENSG00000236008	101929567	13.0	1	0.0132716537944646	0	false	0	ENSG00000236008	0
1119.01169848485	1.5	0.0	0.6666666666666666	0.0	2	1	KIAA0040	protein_coding	0	false	1.39796575178568	ENSG00000235750	9674	2.0	1	0.0102850489513565	0	false	0	ENSG00000235750	0
1441.37548843237	5.5	0.0	0.18181818181818182	0.0	10	1	NFAM1	protein_coding	0	false	1.04682276908445	ENSG00000235568	150372	3.0	1	0.0194844629519351	0	false	0	ENSG00000235568	0
21.9930792781597	3.0	0.0	0.3333333333333333	0.0	5	1	AC009495.3	lncRNA	0	false	2.09292046008381	ENSG00000235192		15.0	1	0.0356275955870242	0	false	0	ENSG00000235192	0
20.1288492260169	1.5	0.0	0.6666666666666666	0.0	2	1	RPL23AP42	processed_pseudogene	0	false	-2.03386364679965	ENSG00000234851		2.0	1	0.0224760863736883	0	false	0	ENSG00000234851	0
178.163380001698	2.0	0.0	0.5	0.0	3	1	FAM133B	protein_coding	0	false	-1.43760415270015	ENSG00000234545	257415	2.0	1	0.0199089240218491	0	false	0	ENSG00000234545	0
87.9258061272391	2.0	0.0	0.5	0.0	3	1	AC073529.1	lncRNA	0	false	-2.96748163499367	ENSG00000234129		7.0	1	2.06332757422208E-4	0	false	0	ENSG00000234129	0
39.7043700414096	2.0	0.0	0.5	0.0	3	1	AL445524.1	lncRNA	0	false	1.77726526687119	ENSG00000233461		4.0	1	0.0323563181684178	0	false	0	ENSG00000233461	0
15.891849813742	2.5	0.0	0.4	0.0	4	1	LINC01762	lncRNA	0	false	3.28806935849827	ENSG00000233154	101929023	3.0	1	0.00341902450891842	0	false	0	ENSG00000233154	0
26.7474843451399	2.0	0.0	0.5	0.0	3	1	AC243772.2	lncRNA	0	false	3.35034947587796	ENSG00000233030		14.0	1	0.00701502000465194	0	false	0	ENSG00000233030	0
39.8957656304674	9.0	0.0	0.1111111111111111	0.0	17	1	FAM157B	transcribed_unprocessed_pseudogene	0	false	1.83525081491711	ENSG00000233013		2.0	1	0.0065437783879744	0	false	0	ENSG00000233013	0
38.1986883745452	2.5	0.0	0.4	0.0	4	1	AL109809.1	transcribed_unitary_pseudogene	0	false	2.12306821268159	ENSG00000232528	100289473	5.0	1	0.0391893410583177	0	false	0	ENSG00000232528	0
14.7733669896028	2.0	0.0	0.5	0.0	3	1	AL133517.1	transcribed_processed_pseudogene	0	false	3.52169073377624	ENSG00000232450		7.0	1	0.0219983253170898	0	false	0	ENSG00000232450	0
11.7640011371236	2.0	0.0	0.5	0.0	3	1	AL691447.2	lncRNA	0	false	2.49887698868048	ENSG00000232063		13.0	1	0.0208359926256166	0	false	0	ENSG00000232063	0
88.2152510982928	13.0	0.0	0.07692307692307693	0.0	25	1	PRH1	protein_coding	0	false	-1.44392972621712	ENSG00000231887	5554	11.0	1	0.0189245623341639	0	false	0	ENSG00000231887	0
564.58498533436	2.0	0.0	0.5	0.0	3	1	LINC-PINT	lncRNA	0	false	1.22463769981305	ENSG00000231721	378805	11.0	1	0.0200361855764478	0	false	0	ENSG00000231721	0
2828.14349276681	2.0	0.0	0.5	0.0	3	1	RPS18	protein_coding	0	false	-1.08644517976889	ENSG00000231500	6222	293.0	1	0.00521497973588417	0	false	0	ENSG00000231500	0
920.541226579471	3.5	0.0	0.2857142857142857	0.0	6	1	HLA-DPA1	protein_coding	0	false	-1.12008405422199	ENSG00000231389	3113	16.0	1	0.0159437891318339	0	false	0	ENSG00000231389	0
25.9983254916433	2.0	0.0	0.5	0.0	3	1	CFAP58-DT	lncRNA	0	false	2.44073406865543	ENSG00000231233	100505869	13.0	1	0.0274288960255265	0	false	0	ENSG00000231233	0
22.9934615387628	2.0	0.0	0.5	0.0	3	1	ARHGAP26-IT1	lncRNA	0	false	1.82659285823864	ENSG00000230789	100874372	13.0	1	0.0100145452541984	0	false	0	ENSG00000230789	0
12.0577488368129	3.0	0.0	0.3333333333333333	0.0	5	1	LINC01001	lncRNA	0	false	2.56683686963155	ENSG00000230724		15.0	1	0.0438919402718756	0	false	0	ENSG00000230724	0
125.238347392373	2.0	0.0	0.5	0.0	3	1	AL139220.2	lncRNA	0	false	-1.91567952683847	ENSG00000230615		13.0	1	0.046487869023304	0	false	0	ENSG00000230615	0
9.09600614181177	1.0	0.0	1.0	0.0	1	1	AL049651.1	lncRNA	0	false	3.26835365845273	ENSG00000230492	101929707	31.0	1	0.045057057703467	0	false	0	ENSG00000230492	0
36.458842631512	1.5	0.0	0.6666666666666666	0.0	2	1	U73166.1	lncRNA	0	false	2.15049479504713	ENSG00000230454		11.0	1	0.0228155207064548	0	false	0	ENSG00000230454	0
184.947840471581	1.5	0.0	0.6666666666666666	0.0	2	1	LINC01036	lncRNA	0	false	-1.83029325763812	ENSG00000230426	104169671	11.0	1	0.0243885345549156	0	false	0	ENSG00000230426	0
65.761411268315	3.0	0.0	0.3333333333333333	0.0	5	1	NFE4	lncRNA	0	false	2.44719232834193	ENSG00000230257	58160	2.0	1	0.0254223086406246	0	false	0	ENSG00000230257	0
15.3599424619254	3.0	0.0	0.3333333333333333	0.0	5	1	AL021707.3	lncRNA	0	false	2.90053595340552	ENSG00000230149		15.0	1	0.00392991811891092	0	false	0	ENSG00000230149	0
60.9786697140306	2.0	0.0	0.5	0.0	3	1	AL669831.4	transcribed_unprocessed_pseudogene	0	false	-1.42308373442274	ENSG00000230092		25.0	1	0.0219756089987427	0	false	0	ENSG00000230092	0
4987.44033272549	2.0	0.0	0.5	0.0	3	1	ANKRD36BP2	transcribed_unprocessed_pseudogene	0	false	-3.28558282658379	ENSG00000230006	645784	14.0	1	1.83893704729848E-4	0	false	0	ENSG00000230006	0
266.821517069305	4.5	0.0	0.2222222222222222	0.0	8	1	DPY19L1P1	unprocessed_pseudogene	0	false	-1.56013499983684	ENSG00000229358		4.0	1	0.0461649208598614	0	false	0	ENSG00000229358	0
1552.76084364595	14.5	0.0	0.06896551724137931	0.0	28	1	RPL41	protein_coding	0	false	-1.29946675708495	ENSG00000229117	6171	3.0	1	0.00364688962108495	0	false	0	ENSG00000229117	0
61.3883452593372	2.0	0.0	0.5	0.0	3	1	SATB1-AS1	lncRNA	0	false	-1.11355944227989	ENSG00000228956		11.0	1	0.048822813042992	0	false	0	ENSG00000228956	0
144.825805247956	2.0	0.0	0.5	0.0	3	1	MIR646HG	lncRNA	0	false	1.64752258174039	ENSG00000228340	284757	13.0	1	0.00444774124251216	0	false	0	ENSG00000228340	0
78.9386396598513	4.0	0.0	0.25	0.0	7	1	LINC01359	lncRNA	0	false	2.27397723287783	ENSG00000226891	101927084	4.0	1	0.00741314855698834	0	false	0	ENSG00000226891	0
8.36064693873963	3.0	0.0	0.3333333333333333	0.0	5	1	TRBV2	TR_V_gene	0	false	-2.18132016135348	ENSG00000226660		2.0	1	0.0293159206845421	0	false	0	ENSG00000226660	0
127.690130622237	21.5	0.0	0.046511627906976744	0.0	42	1	SLC26A6	protein_coding	0	false	1.56277472976176	ENSG00000225697	65010	13.0	1	0.00186377013769366	0	false	0	ENSG00000225697	0
213.999916199125	2.0	0.0	0.5	0.0	3	1	SBDSP1	transcribed_unprocessed_pseudogene	0	false	-1.92593529511585	ENSG00000225648	155370	9.0	1	0.00214668065032925	0	false	0	ENSG00000225648	0
18.3636892001745	1.5	0.0	0.6666666666666666	0.0	2	1	AL021707.1	lncRNA	0	false	3.43849801592989	ENSG00000225450		11.0	1	0.00211844843273977	0	false	0	ENSG00000225450	0
37.5280968079979	2.5	0.0	0.4	0.0	4	1	AL390066.2	lncRNA	0	false	2.12492418564342	ENSG00000224950		3.0	1	0.0186091133122774	0	false	0	ENSG00000224950	0
32.8087625563136	3.0	0.0	0.3333333333333333	0.0	5	1	TNK2-AS1	lncRNA	0	false	-2.35521924909492	ENSG00000224614		15.0	1	0.0199329752981146	0	false	0	ENSG00000224614	0
430.892935937968	2.0	0.0	0.5	0.0	3	1	PELATON	lncRNA	0	false	1.79734601008695	ENSG00000224397	100506115	4.0	1	0.0132434291571657	0	false	0	ENSG00000224397	0
59.0022012025541	2.0	0.0	0.5	0.0	3	1	EPB41L4A-AS1	lncRNA	0	false	-1.22563933514452	ENSG00000224032		25.0	1	0.0327402379900947	0	false	0	ENSG00000224032	0
641.731206151086	2.5	0.0	0.4	0.0	4	1	HLA-DPB1	protein_coding	0	false	-1.29594903440671	ENSG00000223865	3115	11.0	1	0.0100845280589533	0	false	0	ENSG00000223865	0
621.245837806594	2.0	0.0	0.5	0.0	3	1	AC135983.3	transcribed_processed_pseudogene	0	false	-1.94462224661071	ENSG00000223509		9.0	1	0.00181650629282181	0	false	0	ENSG00000223509	0
19.376303168454	2.0	0.0	0.5	0.0	3	1	RN7SKP97	misc_RNA	0	false	4.10330525248914	ENSG00000222898		13.0	1	0.00403689438490884	0	false	0	ENSG00000222898	0
28.1633051253903	2.0	0.0	0.5	0.0	3	1	RN7SKP16	misc_RNA	0	false	2.25913471783857	ENSG00000222112		13.0	1	0.0218379397968414	0	false	0	ENSG00000222112	0
179.144931815968	2.0	0.0	0.5	0.0	3	1	CYTOR	lncRNA	0	false	1.17962533307241	ENSG00000222041	112597	11.0	1	0.00364688962108495	0	false	0	ENSG00000222041	0
24.0718101748583	3.5	0.002292114164173567	0.2857142857142857	0.0	6	2	TMEM141	protein_coding	1	false	0.138215958261687	ENSG00000244187	85014	2.5	1	0.906623436236373	0	false	0	ENSG00000244187	13518
9904.53451241243	4.0	0.0	0.25	0.0	7	1	UBA52	protein_coding	0	false	-1.87358418946443	ENSG00000221983	7311	2.0	1	0.0122499275270194	0	false	0	ENSG00000221983	0
672.897118575288	22.5	0.0	0.044444444444444446	0.0	44	1	CEBPD	protein_coding	0	false	1.17373609678861	ENSG00000221869	1052	20.0	1	0.0452943572023105	0	false	0	ENSG00000221869	0
46.9967323614214	2.5	0.0	0.4	0.0	4	1	LINC01881	transcribed_unprocessed_pseudogene	0	false	-1.63344508514463	ENSG00000220804		4.0	1	0.0381464811315356	0	false	0	ENSG00000220804	0
12.384744688266	3.0	0.0	0.3333333333333333	0.0	5	1	AL590867.2	processed_pseudogene	0	false	-1.99961112829501	ENSG00000218426		2.0	1	0.02610236182365	0	false	0	ENSG00000218426	0
135.197612271128	7.5	0.0	0.13333333333333333	0.0	14	1	CKLF	protein_coding	0	false	1.27857597792332	ENSG00000217555	51192	2.0	1	0.0487098062908547	0	false	0	ENSG00000217555	0
930.317972540176	2.0	0.0	0.5	0.0	3	1	CCDC7	protein_coding	0	false	-1.95081351570575	ENSG00000216937	79741	293.0	1	0.00211055964857161	0	false	0	ENSG00000216937	0
92.7301172364405	21.5	0.0	0.046511627906976744	0.0	42	1	TNFRSF25	protein_coding	0	false	-1.23522913245519	ENSG00000215788	8718	2.0	1	0.0470381193955172	0	false	0	ENSG00000215788	0
52.3985018220864	2.0	0.0	0.5	0.0	3	1	ARHGAP27P1-BPTFP1-KPNA2P3	lncRNA	0	false	1.39666064851271	ENSG00000215769	109286553	25.0	1	0.0376944491704238	0	false	0	ENSG00000215769	0
82.4190457090957	33.5	0.0	0.029850746268656716	0.0	66	1	NPEPL1	protein_coding	0	false	1.18807596756841	ENSG00000215440	79716	2.0	1	0.0147772138904919	0	false	0	ENSG00000215440	0
4839.31696694908	2.0	0.0012050640157406083	0.5	0.0	3	2	DDX3X	protein_coding	1	false	0.435185823146912	ENSG00000215301	1654	147.0	1	0.38643126456945	0	false	0	ENSG00000215301	7107
162.41711467366	2.0	0.0	0.5	0.0	3	1	LINC02649	lncRNA	0	false	2.88394100562088	ENSG00000215244	399715	13.0	1	4.59910857975715E-4	0	false	0	ENSG00000215244	0
867.972014076019	21.5	0.0	0.046511627906976744	0.0	42	1	UBXN2B	protein_coding	0	false	1.55578802312452	ENSG00000215114	137886	3.0	1	0.00980272499168831	0	false	0	ENSG00000215114	0
8.04644622367579	2.0	0.0	0.5	0.0	3	1	AC004540.1	lncRNA	0	false	3.55895347481142	ENSG00000214870	441204	13.0	1	0.026161293757474	0	false	0	ENSG00000214870	0
64.4742823445033	2.0	0.0	0.5	0.0	3	1	SEPTIN7P2	transcribed_unprocessed_pseudogene	0	false	-1.14048938208433	ENSG00000214765	641977	9.0	1	0.0252798202210873	0	false	0	ENSG00000214765	0
580.714308483669	6.0	0.0	0.16666666666666666	0.0	11	1	ZSWIM8	protein_coding	0	false	1.07266068264313	ENSG00000214655	23053	5.0	1	4.88453647902197E-4	0	false	0	ENSG00000214655	0
59.2122066975339	5.5	0.0	0.18181818181818182	0.0	10	1	STARD10	protein_coding	0	false	1.37624191362351	ENSG00000214530	10809	2.0	1	0.047527209733446	0	false	0	ENSG00000214530	0
96.9434716098387	8.0	0.0	0.1250	0.0	15	1	PLIN5	protein_coding	0	false	1.89620613863554	ENSG00000214456	440503	2.0	1	0.00687029939008671	0	false	0	ENSG00000214456	0
9.31515536024792	13.0	0.0	0.07692307692307693	0.0	25	1	ZNF726	protein_coding	0	false	-2.32914475153276	ENSG00000213967	730087	3.0	1	0.0340272921971365	0	false	0	ENSG00000213967	0
158.400249266502	8.5	0.0	0.11764705882352941	0.0	16	1	IRF9	protein_coding	0	false	1.33576035606719	ENSG00000213928	10379	4.0	1	0.0364313042365166	0	false	0	ENSG00000213928	0
382.699320497601	2.5	0.0	0.4	0.0	4	1	LTB4R	protein_coding	0	false	1.52756534488231	ENSG00000213903	1241	2.0	1	0.00146910641847838	0	false	0	ENSG00000213903	0
1036.37632219775	21.0	0.0	0.047619047619047616	0.0	41	1	RPS29	protein_coding	0	false	-1.00385278796401	ENSG00000213741	6235	14.0	1	0.0366921905495634	0	false	0	ENSG00000213741	0
187.852279620905	9.0	0.0	0.1111111111111111	0.0	17	1	DDAH2	protein_coding	0	false	1.99192555027689	ENSG00000213722	23564	5.0	1	2.87227705652939E-5	0	false	0	ENSG00000213722	0
773.319934731595	12.0	0.0	0.08333333333333333	0.0	23	1	LBH	protein_coding	0	false	-1.00430291256438	ENSG00000213626	81606	2.0	1	0.0213077564005843	0	false	0	ENSG00000213626	0
22.6935156225916	2.5	0.0	0.4	0.0	4	1	LINC00671	lncRNA	0	false	2.85987309849464	ENSG00000213373	388387	5.0	1	0.0498833913118869	0	false	0	ENSG00000213373	0
232.972113689833	2.5	0.0	0.4	0.0	4	1	MXD3	protein_coding	0	false	1.9790194372421	ENSG00000213347	83463	4.0	1	0.00151499947069757	0	false	0	ENSG00000213347	0
72.58578144192	1.5	0.0	0.6666666666666666	0.0	2	1	LINC02656	lncRNA	0	false	3.36647851524462	ENSG00000212743		2.0	1	0.00107805344282154	0	false	0	ENSG00000212743	0
49.2201909032121	2.5	0.0	0.4	0.0	4	1	SNORA74B	snoRNA	0	false	2.80418243543692	ENSG00000212402	677841	4.0	1	0.016793143681884	0	false	0	ENSG00000212402	0
563.309800691827	19.0	0.0	0.05263157894736842	0.0	37	1	TRBC2	TR_C_gene	0	false	-1.25283563355206	ENSG00000211772		3.0	1	0.0128386450084094	0	false	0	ENSG00000211772	0
324.565907101	19.0	0.0	0.05263157894736842	0.0	37	1	TRBC1	TR_C_gene	0	false	-1.23686077153107	ENSG00000211751		3.0	1	0.0305195860524419	0	false	0	ENSG00000211751	0
361.00625687782	2.0	0.0	0.5	0.0	3	1	HCG27	lncRNA	0	false	1.83826071071559	ENSG00000206344	253018	9.0	1	0.0167475284908625	0	false	0	ENSG00000206344	0
1296.34991294589	2.0	0.0	0.5	0.0	3	1	HBM	protein_coding	0	false	-2.28710177863896	ENSG00000206177	3042	293.0	1	0.0194844629519351	0	false	0	ENSG00000206177	0
17.408170755278	28.5	0.0	0.03508771929824561	0.0	56	1	DOK6	protein_coding	0	false	4.6594170813757	ENSG00000206052	220164	2.0	1	6.7027708843712E-4	0	false	0	ENSG00000206052	0
78.3537466764678	4.0	0.1880332242948502	0.25	0.0	7	2	RCC1L	protein_coding	1	false	-0.228954998292742	ENSG00000274523	81554	2.5	1	0.702938100612454	0	false	0	ENSG00000274523	1108947
12.4158685730811	4.0	0.0	0.25	0.0	7	1	CPT1B	protein_coding	0	false	1.65141495781942	ENSG00000205560	1375	3.0	1	0.0283954157142561	0	false	0	ENSG00000205560	0
2031.74518078878	4.5	0.0	0.2222222222222222	0.0	8	1	NAP1L4	protein_coding	0	false	-1.5687286278717	ENSG00000205531	4676	5.0	1	0.0287530861849218	0	false	0	ENSG00000205531	0
580.890377411244	22.5	0.0	0.044444444444444446	0.0	44	1	E2F4	protein_coding	0	false	-1.15036857763211	ENSG00000205250	1874	20.0	1	0.0381464811315356	0	false	0	ENSG00000205250	0
721.889960986358	2.5	0.0	0.4	0.0	4	1	CD177	protein_coding	0	false	6.0153484912835	ENSG00000204936	57126	4.0	1	9.11745364056333E-5	0	false	0	ENSG00000204936	0
32.4035390493918	7.0	0.2655300145211316	0.14285714285714285	0.0	13	2	TCTN1	protein_coding	1	false	-0.895629821856358	ENSG00000204852	79600	3.5	1	0.111890260240207	0	false	0	ENSG00000204852	1565993
623.85717345667	2.0	0.0	0.5	0.0	3	1	ATXN2	protein_coding	0	false	-1.3004167652334	ENSG00000204842	6311	293.0	1	0.0279260048557047	0	false	0	ENSG00000204842	0
8.40756242876142	8.5	0.8582972226724986	0.11764705882352941	0.0	16	2	FAM153CP	lncRNA	1	false	-0.254840903278512	ENSG00000204677	653316	2.0	1	0.899890453876126	0	false	0	ENSG00000204677	5061904
250.128271667961	5.0	0.0	0.2	0.0	9	1	TBC1D8	protein_coding	0	false	1.44958874410691	ENSG00000204634	11138	4.0	1	5.32453102353087E-4	0	false	0	ENSG00000204634	0
1216.987562519	4.5	0.0031619577551049477	0.2222222222222222	0.0	8	2	LILRB3	protein_coding	1	false	1.76836959883262	ENSG00000204577		1.5	1	1.08494960025683E-4	0	false	0	ENSG00000204577	18648
13189.3922365695	2.0	0.0	0.5	0.0	3	1	HLA-C	protein_coding	0	false	1.13538245612227	ENSG00000204525	3107	293.0	1	0.029337838674116	0	false	0	ENSG00000204525	0
7.10997586288013	10.0	0.019745449514142335	0.1	0.0	19	2	APOM	protein_coding	1	false	-0.341197208024634	ENSG00000204444	55937	2.5	1	0.856120454206695	0	false	0	ENSG00000204444	116451
449.234629961158	2.0	0.0	0.5	0.0	3	1	HSPA1A	protein_coding	0	false	1.67467267611663	ENSG00000204389	3303	293.0	1	0.0127807345282917	0	false	0	ENSG00000204389	0
97.2563559401547	9.0	0.0	0.1111111111111111	0.0	17	1	AGER	protein_coding	0	false	1.18115272908818	ENSG00000204305	177	2.0	1	0.0235680234161749	0	false	0	ENSG00000204305	0
2077.51989933566	3.5	0.0	0.2857142857142857	0.0	6	1	HLA-DRA	protein_coding	0	false	-1.18922080502274	ENSG00000204287	3122	16.0	1	0.0158043641200381	0	false	0	ENSG00000204287	0
18.5207581152749	6.0	0.0	0.16666666666666666	0.0	11	1	TCEA3	protein_coding	0	false	-1.8534986573412	ENSG00000204219	6920	2.0	1	0.0198026108405936	0	false	0	ENSG00000204219	0
185.409407592882	2.0	0.0	0.5	0.0	3	1	BMS1P1	transcribed_unprocessed_pseudogene	0	false	-1.94273203855921	ENSG00000204177	399761	2.0	1	0.0320464442789858	0	false	0	ENSG00000204177	0
22.6403537202303	12.5	0.0	0.08	0.0	24	1	AGAP9	protein_coding	0	false	-1.88244871220694	ENSG00000204172	642517	2.0	1	0.0447730514314102	0	false	0	ENSG00000204172	0
1024.74494703563	5.5	0.0	0.18181818181818182	0.0	10	1	NHSL2	protein_coding	0	false	1.37653411897677	ENSG00000204131		6.0	1	0.0116462811497265	0	false	0	ENSG00000204131	0
88.1705365333259	2.0	0.0	0.5	0.0	3	1	LINC01270	lncRNA	0	false	2.36323278322221	ENSG00000203999	284751	7.0	1	0.0185685139278219	0	false	0	ENSG00000203999	0
465.364162107026	2.0	0.0	0.5	0.0	3	1	GDI1	protein_coding	0	false	1.08879317891614	ENSG00000203879	2664	293.0	1	5.82226552536864E-4	0	false	0	ENSG00000203879	0
71.6807016222512	2.0	0.0	0.5	0.0	3	1	PRDX6-AS1	lncRNA	0	false	1.23976118902363	ENSG00000203739	101928673	5.0	1	0.0346613970512998	0	false	0	ENSG00000203739	0
49.6477325219306	2.0	0.0	0.5	0.0	3	1	LINC00862	lncRNA	0	false	2.47466724898284	ENSG00000203721	554279	13.0	1	0.0114577924713176	0	false	0	ENSG00000203721	0
2145.71959224919	16.5	0.0	0.06060606060606061	0.0	32	1	CR1	protein_coding	0	false	2.09181651979628	ENSG00000203710	1378	2.0	1	1.11918713167762E-4	0	false	0	ENSG00000203710	0
800.775631723096	3.0	0.0	0.3333333333333333	0.0	5	1	MIR29B2CHG	lncRNA	0	false	1.5176611699257	ENSG00000203709		15.0	1	0.00777320713623869	0	false	0	ENSG00000203709	0
2824.29235806962	4.0	0.0	0.25	0.0	7	1	RNU4-2	snRNA	0	false	2.65456795650709	ENSG00000202538	26834	4.0	1	0.0102403783014738	0	false	0	ENSG00000202538	0
9.53580790809409	4.5	0.0	0.2222222222222222	0.0	8	1	SNORA65	snoRNA	0	false	2.35465545348155	ENSG00000201302	26783	5.0	1	0.0468809109061872	0	false	0	ENSG00000201302	0
832.789757277	1.5	0.0	0.6666666666666666	0.0	2	1	RNU4-1	snRNA	0	false	2.57847829283084	ENSG00000200795	26835	2.0	1	0.0169813095945536	0	false	0	ENSG00000200795	0
2351.55743754435	4.0	0.0	0.25	0.0	7	1	SNORA73B	snoRNA	0	false	1.87242038240024	ENSG00000200087	26768	4.0	1	0.0267243024637392	0	false	0	ENSG00000200087	0
209.129164505136	1.5	0.0	0.6666666666666666	0.0	2	1	RNU5A-1	snRNA	0	false	3.30207307068334	ENSG00000199568	26831	2.0	1	0.0253274765198347	0	false	0	ENSG00000199568	0
15.2598234604039	27.5	0.0	0.03636363636363636	0.0	54	1	MAGEE1	protein_coding	0	false	-2.15726779357887	ENSG00000198934	57692	3.0	1	0.0386954107874484	0	false	0	ENSG00000198934	0
37.7851737135046	10.5	0.013357948946115819	0.09523809523809523	0.0	20	2	HGH1	protein_coding	1	false	0.179366905297158	ENSG00000235173	51236	2.0	1	0.862180005883324	0	false	0	ENSG00000235173	78780
155.167179251557	7.0	0.0	0.14285714285714285	0.0	13	1	DZIP3	protein_coding	0	false	-1.26414449358048	ENSG00000198919	9666	11.0	1	0.00701502000465194	0	false	0	ENSG00000198919	0
88.3180101939593	22.0	0.0	0.045454545454545456	0.0	43	1	SHISA4	protein_coding	0	false	-4.52058158339258	ENSG00000198892	149345	2.0	1	1.24885509765639E-11	0	false	0	ENSG00000198892	0
1117.07382398438	2.0	0.0	0.5	0.0	3	1	OPA1	protein_coding	0	false	-1.23304304110003	ENSG00000198836	4976	293.0	1	0.0220127683632381	0	false	0	ENSG00000198836	0
733.034263696864	21.0	0.0	0.047619047619047616	0.0	41	1	GK	protein_coding	0	false	1.71400114692632	ENSG00000198814	2710	14.0	1	0.00605271756437013	0	false	0	ENSG00000198814	0
308.892628475714	12.0	0.0847405695729051	0.08333333333333333	0.0	23	2	C19orf38	protein_coding	1	false	0.857864289095521	ENSG00000214212	255809	4.5	1	0.122178193066568	0	false	0	ENSG00000214212	499767
605.373781212233	28.0	0.0	0.03571428571428571	0.0	55	1	MT-ND5	protein_coding	0	false	-1.06493301082143	ENSG00000198786	4540	14.0	1	0.0454846019118548	0	false	0	ENSG00000198786	0
1509.63810452667	2.5	0.0	0.4	0.0	4	1	RPL10A	protein_coding	0	false	-1.06096898599377	ENSG00000198755	4736	11.0	1	0.0214429505707235	0	false	0	ENSG00000198755	0
28.2853906771552	7.0	0.0	0.14285714285714285	0.0	13	1	PLXNB3	protein_coding	0	false	3.52417813882335	ENSG00000198753	5365	3.0	1	0.00674910837150255	0	false	0	ENSG00000198753	0
916.274446931103	10.0	0.0	0.1	0.0	19	1	MSRB1	protein_coding	0	false	1.99929707940671	ENSG00000198736	51734	2.0	1	0.00186798024033439	0	false	0	ENSG00000198736	0
725.170931619987	33.0	0.0	0.030303030303030304	0.0	65	1	F5	protein_coding	0	false	2.08174623356166	ENSG00000198734	2153	3.0	1	1.92476760923246E-4	0	false	0	ENSG00000198734	0
208.282048227626	2.0	0.0	0.5	0.0	3	1	TOGARAM1	protein_coding	0	false	-1.06045734218603	ENSG00000198718	23116	293.0	1	0.0365731245109036	0	false	0	ENSG00000198718	0
172.784147725162	4.5	0.0	0.2222222222222222	0.0	8	1	CEP290	protein_coding	0	false	-1.11172709364447	ENSG00000198707	80184	7.0	1	0.00364688962108495	0	false	0	ENSG00000198707	0
186.885712447746	5.5	0.0	0.18181818181818182	0.0	10	1	TAFA2	protein_coding	0	false	1.88428265655462	ENSG00000198673	338811	2.0	1	5.71741947003404E-4	0	false	0	ENSG00000198673	0
386.79975911564	5.0	0.0	0.2	0.0	9	1	NUDT16	protein_coding	0	false	1.33910236420998	ENSG00000198585	131870	2.0	1	0.031460230297826	0	false	0	ENSG00000198585	0
202.08439961787	2.0	0.0	0.5	0.0	3	1	WDHD1	protein_coding	0	false	-1.40599335649432	ENSG00000198554	11169	293.0	1	0.0453238040781716	0	false	0	ENSG00000198554	0
1128.76618311727	2.0	0.0	0.5	0.0	3	1	ASPH	protein_coding	0	false	1.99635225369089	ENSG00000198363	444	293.0	1	0.00107490974970882	0	false	0	ENSG00000198363	0
1498.19769670397	1.5	0.0	0.6666666666666666	0.0	2	1	RPL23A	protein_coding	0	false	-1.4126901758807	ENSG00000198242	6147	18.0	1	1.83939991384821E-6	0	false	0	ENSG00000198242	0
461.09029322376	4.5	0.0	0.2222222222222222	0.0	8	1	CSF2RA	protein_coding	0	false	1.48081348567207	ENSG00000198223	1438	2.0	1	0.00146344883503993	0	false	0	ENSG00000198223	0
131.411102331801	4.0	0.0	0.25	0.0	7	1	CACNA1E	protein_coding	0	false	3.20348189876876	ENSG00000198216	777	4.0	1	2.91447746220906E-4	0	false	0	ENSG00000198216	0
3138.18411451744	2.0	0.0	0.5	0.0	3	1	MAN1A2	protein_coding	0	false	-2.09376485095911	ENSG00000198162	10905	293.0	1	5.32453102353087E-4	0	false	0	ENSG00000198162	0
49.7845099678376	11.0	0.0	0.09090909090909091	0.0	21	1	NUP62CL	protein_coding	0	false	-2.29046510564491	ENSG00000198088	54830	2.0	1	0.0258596915758969	0	false	0	ENSG00000198088	0
84.8944890570265	18.5	0.013227726747707377	0.05405405405405406	0.0	36	2	SH2D1B	protein_coding	1	false	-0.409248543552363	ENSG00000198574	117157	4.5	1	0.698668919845845	0	false	0	ENSG00000198574	78012
1055.8762024341	19.0	0.0	0.05263157894736842	0.0	37	1	SIRPA	protein_coding	0	false	1.46211749684739	ENSG00000198053	140885	2.0	1	0.00567016079407533	0	false	0	ENSG00000198053	0
2950.87483086521	2.0	0.0	0.5	0.0	3	1	RPS4X	protein_coding	0	false	-1.19320277950124	ENSG00000198034	6191	293.0	1	0.00140367252214151	0	false	0	ENSG00000198034	0
178.195495834145	20.0	0.0	0.05	0.0	39	1	FCGR1B	protein_coding	0	false	2.18159221536367	ENSG00000198019	2210	2.0	1	0.00217832125101096	0	false	0	ENSG00000198019	0
112.592632865518	2.0	0.0	0.5	0.0	3	1	ENTPD7	protein_coding	0	false	1.12051696041298	ENSG00000198018	57089	293.0	1	0.0419681850056811	0	false	0	ENSG00000198018	0
313.223631417949	17.5	0.0	0.05714285714285714	0.0	34	1	NOL8	protein_coding	0	false	-1.14350284850542	ENSG00000198000	55035	5.0	1	0.00677401754251545	0	false	0	ENSG00000198000	0
2439.72347889711	2.0	0.0	0.5	0.0	3	1	RPL12	protein_coding	0	false	-1.42773176659081	ENSG00000197958	6136	293.0	1	1.16693952454146E-5	0	false	0	ENSG00000197958	0
1057.16756942341	2.0	0.0	0.5	0.0	3	1	PLCG2	protein_coding	0	false	1.15691819360853	ENSG00000197943	5336	293.0	1	0.0151002569296371	0	false	0	ENSG00000197943	0
637.685806972301	23.0	0.0	0.043478260869565216	0.0	45	1	CYRIA	protein_coding	0	false	1.06444058008366	ENSG00000197872	81553	2.0	1	0.0296684705063739	0	false	0	ENSG00000197872	0
383.370828453761	3.5	0.0	0.2857142857142857	0.0	6	1	SLC9A8	protein_coding	0	false	1.14993302000446	ENSG00000197818	23315	2.0	1	0.00503648904646032	0	false	0	ENSG00000197818	0
60.2943814827273	8.0	0.035569481342617996	0.1250	0.0	15	3	KLHL14	protein_coding	2	false	0.248239702181527	ENSG00000197705	57565	3.3333333333333335	1	0.879164982600998	0	false	0	ENSG00000197705	209775
441.207462837376	5.0	0.13758026129898002	0.2	0.0	9	2	TRIM10	protein_coding	1	false	-1.54681866356967	ENSG00000204613	10107	2.0	1	0.169362112439496	0	false	0	ENSG00000204613	811395
87.9896743798339	2.5	0.0	0.4	0.0	4	1	ELANE	protein_coding	0	false	3.62597635705826	ENSG00000197561	1991	2.0	1	0.00688634445926667	0	false	0	ENSG00000197561	0
934.542749896374	2.0	0.0	0.5	0.0	3	1	SIPA1L1	protein_coding	0	false	1.0030684819151	ENSG00000197555	26037	293.0	1	0.0339705880527506	0	false	0	ENSG00000197555	0
436.249392720469	4.0	0.0	0.25	0.0	7	1	ATG7	protein_coding	0	false	1.24296131439478	ENSG00000197548	10533	13.0	1	0.00145108596937226	0	false	0	ENSG00000197548	0
74.4040769974909	2.5	0.0	0.4	0.0	4	1	VEPH1	protein_coding	0	false	1.42290287046128	ENSG00000197415	79674	2.0	1	0.0379715495415313	0	false	0	ENSG00000197415	0
1310.23627121666	16.5	0.0	0.06060606060606061	0.0	32	1	PELI1	protein_coding	0	false	1.28964181565137	ENSG00000197329	57162	4.0	1	0.028610438842216	0	false	0	ENSG00000197329	0
1051.84262608722	2.0	0.0	0.5	0.0	3	1	SVIL	protein_coding	0	false	1.68487978857516	ENSG00000197321	6840	293.0	1	1.83893704729848E-4	0	false	0	ENSG00000197321	0
1270.29976729393	2.0	0.0	0.5	0.0	3	1	DDI2	protein_coding	0	false	-1.52500595904477	ENSG00000197312	84301	293.0	1	0.040343221021164	0	false	0	ENSG00000197312	0
3721.50314729398	6.5	0.0	0.15384615384615385	0.0	12	1	SERPINA1	protein_coding	0	false	1.3999653987402	ENSG00000197249	5265	4.0	1	0.0135951786325643	0	false	0	ENSG00000197249	0
43.3611789876789	2.0	0.0	0.5	0.0	3	1	MIRLET7BHG	lncRNA	0	false	1.24545711404745	ENSG00000197182	400931	293.0	1	0.0158043641200381	0	false	0	ENSG00000197182	0
5986.64489671055	2.0	0.0	0.5	0.0	3	1	IGF2R	protein_coding	0	false	1.37845518704716	ENSG00000197081	3482	293.0	1	0.00274911100611523	0	false	0	ENSG00000197081	0
235.717537221148	21.0	0.199987215164375	0.047619047619047616	0.0	41	2	MAFG	protein_coding	1	false	1.33225926449881	ENSG00000197063	4097	2.5	1	0.0182906843632035	0	false	0	ENSG00000197063	1179447
2627.09096746964	2.0	0.0	0.5	0.0	3	1	AP2A1	protein_coding	0	false	-1.75688652704616	ENSG00000196961	160	293.0	1	0.0391893410583177	0	false	0	ENSG00000196961	0
424.906118722892	4.0	0.0	0.25	0.0	7	1	PDLIM7	protein_coding	0	false	1.3588366085509	ENSG00000196923	9260	13.0	1	0.00196228232045887	0	false	0	ENSG00000196923	0
319.733987554262	2.0	0.0	0.5	0.0	3	1	KPNA5	protein_coding	0	false	-1.28619304995394	ENSG00000196911	3841	293.0	1	0.00280128410172543	0	false	0	ENSG00000196911	0
182.624499817887	2.0	0.0	0.5	0.0	3	1	H2BU1	protein_coding	0	false	-1.98220464510018	ENSG00000196890	128312	293.0	1	0.00179395082387666	0	false	0	ENSG00000196890	0
981.098106240757	5.5	0.0	0.18181818181818182	0.0	10	1	STRN3	protein_coding	0	false	-1.83582207022235	ENSG00000196792	29966	6.0	1	0.00130033217221194	0	false	0	ENSG00000196792	0
309.472597141042	2.5	0.0	0.4	0.0	4	1	HLA-DQA1	protein_coding	0	false	-1.28423763587455	ENSG00000196735	3117	12.0	1	0.0214429505707235	0	false	0	ENSG00000196735	0
791.69563017383	2.0	0.0	0.5	0.0	3	1	TECPR2	protein_coding	0	false	1.62927763957364	ENSG00000196663	9895	293.0	1	0.00847771077549744	0	false	0	ENSG00000196663	0
112.273627843089	12.0	0.06568963845027445	0.08333333333333333	0.0	23	2	AC107959.4	lncRNA	1	false	1.05546697933056	ENSG00000284948	254896	3.0	1	0.214949483020882	0	false	0	ENSG00000284948	387412
20.6512794308909	12.5	0.059849308499779236	0.08	0.0	24	2	XRCC2	protein_coding	1	false	0.639355004914934	ENSG00000196584	7516	2.5	1	0.659619808375225	0	false	0	ENSG00000196584	352968
1723.00998691583	2.0	0.0	0.5	0.0	3	1	NACA	protein_coding	0	false	-1.20919030437079	ENSG00000196531	4666	293.0	1	0.00558620955662809	0	false	0	ENSG00000196531	0
170.257251803248	4.5	0.0	0.2222222222222222	0.0	8	1	SLC6A9	protein_coding	0	false	-2.44381804577425	ENSG00000196517	6536	3.0	1	0.0160728556479704	0	false	0	ENSG00000196517	0
147.53953166128	13.0	0.0	0.07692307692307693	0.0	25	1	ZNF569	protein_coding	0	false	-1.73908107980646	ENSG00000196437	148266	3.0	1	0.0171063292735238	0	false	0	ENSG00000196437	0
96.582443448981	2.5	0.05136519662534599	0.4	0.0	4	3	C1orf174	protein_coding	2	false	-0.0820584274873502	ENSG00000198912	339448	1.6666666666666667	1	0.913375172984852	0	false	0	ENSG00000198912	302932
54.0504553874917	3.0	0.0	0.3333333333333333	0.0	5	1	PRTN3	protein_coding	0	false	6.05053835392796	ENSG00000196415	5657	3.0	1	0.00455129414048648	0	false	0	ENSG00000196415	0
467.22523400026	13.5	0.0	0.07407407407407407	0.0	26	1	NTNG2	protein_coding	0	false	2.44266745198705	ENSG00000196358	84628	2.0	1	2.11467377779586E-4	0	false	0	ENSG00000196358	0
26.8931174342046	3.0	0.0	0.3333333333333333	0.0	5	1	NLGN3	protein_coding	0	false	2.39024621509849	ENSG00000196338	54413	4.0	1	0.00991041972179548	0	false	0	ENSG00000196338	0
633.790307690342	22.0	0.0	0.045454545454545456	0.0	43	1	SEMA4A	protein_coding	0	false	1.25402238626317	ENSG00000196189	64218	3.0	1	0.0133601059756742	0	false	0	ENSG00000196189	0
733.623634919159	30.0	0.0	0.03333333333333333	0.0	59	1	IL1RAP	protein_coding	0	false	1.62566985555397	ENSG00000196083	3556	2.0	1	0.040343221021164	0	false	0	ENSG00000196083	0
59.9445853547486	5.0	0.0	0.2	0.0	9	1	KAZN	protein_coding	0	false	2.62419865339217	ENSG00000189337	23254	2.0	1	0.00354771231364768	0	false	0	ENSG00000189337	0
584.111215814473	4.0	0.020303471981541005	0.25	0.0	7	3	LIN54	protein_coding	2	false	-1.10452616425858	ENSG00000189308	132660	3.6666666666666665	1	0.0355008600653873	0	false	0	ENSG00000189308	119742
50.5088653296383	2.0	0.0	0.5	0.0	3	1	BTBD8	protein_coding	0	false	1.38305475416625	ENSG00000189195	284697	293.0	1	0.0437298338742765	0	false	0	ENSG00000189195	0
136.224500462063	28.0	0.0	0.03571428571428571	0.0	55	1	TMEM120A	protein_coding	0	false	1.36096717099221	ENSG00000189077	83862	14.0	1	0.00822828286863514	0	false	0	ENSG00000189077	0
3395.54367562392	7.0	0.0	0.14285714285714285	0.0	13	1	LITAF	protein_coding	0	false	1.20980772774002	ENSG00000189067	9516	5.0	1	0.0372654561596976	0	false	0	ENSG00000189067	0
96.3586094984286	7.5	0.0	0.13333333333333333	0.0	14	1	KCTD21	protein_coding	0	false	1.17864698729299	ENSG00000188997	283219	6.0	1	0.0406900828404546	0	false	0	ENSG00000188997	0
7158.48045537547	4.0	0.0	0.25	0.0	7	1	LRRK2	protein_coding	0	false	1.55774252080083	ENSG00000188906	120892	13.0	1	0.0395662140255718	0	false	0	ENSG00000188906	0
1818.23255767065	6.0	0.0	0.16666666666666666	0.0	11	1	MSL1	protein_coding	0	false	1.23048703172926	ENSG00000188895	339287	2.0	1	0.0235680234161749	0	false	0	ENSG00000188895	0
429.37746280243	2.0	0.0	0.5	0.0	3	1	MTF1	protein_coding	0	false	1.74731675775274	ENSG00000188786	4520	293.0	1	0.00114917908097459	0	false	0	ENSG00000188786	0
1720.18274289521	2.0	0.0	0.5	0.0	3	1	DPYD	protein_coding	0	false	1.07349595267446	ENSG00000188641	1806	293.0	1	0.00364688962108495	0	false	0	ENSG00000188641	0
18.7135373353754	11.0	1.0674313603539873	0.09090909090909091	0.0	21	2	ZNF658	protein_coding	1	false	0.580877906990083	ENSG00000274349	26149	2.5	1	0.660061634086833	0	false	0	ENSG00000274349	6295296
1513.435609763	2.0	0.0	0.5	0.0	3	1	RALGAPA2	protein_coding	0	false	1.98527102098263	ENSG00000188559	57186	293.0	1	1.51579172719293E-5	0	false	0	ENSG00000188559	0
11.0213371765186	9.0	0.15524113827766223	0.1111111111111111	0.0	17	2	NPEPPSP1	transcribed_unprocessed_pseudogene	1	false	-0.111084049567359	ENSG00000274487	440434	2.5	1	0.957278576102046	0	false	0	ENSG00000274487	915552
808266.207085512	14.5	0.0	0.06896551724137931	0.0	28	1	HBA2	protein_coding	0	false	-2.33304335428533	ENSG00000188536	3040	3.0	1	0.0236093189229905	0	false	0	ENSG00000188536	0
6448.05584962653	6.0	0.0	0.16666666666666666	0.0	11	1	SELL	protein_coding	0	false	1.28289298839916	ENSG00000188404	6402	2.0	1	0.0301294505611547	0	false	0	ENSG00000188404	0
181.804933007978	25.0	0.0	0.04	0.0	49	1	C3orf62	protein_coding	0	false	1.63794205257866	ENSG00000188315	375341	2.0	1	0.0165309275810828	0	false	0	ENSG00000188315	0
748.899012534476	4.5	0.0	0.2222222222222222	0.0	8	1	PLSCR1	protein_coding	0	false	1.9918694439566	ENSG00000188313	5359	9.0	1	4.95354088614978E-4	0	false	0	ENSG00000188313	0
129.801698831746	4.5	0.0	0.2222222222222222	0.0	8	1	PEAK3	protein_coding	0	false	1.85757142946902	ENSG00000188305	374872	5.0	1	0.0189171724452818	0	false	0	ENSG00000188305	0
574.955878661556	2.0	0.0	0.5	0.0	3	1	ZC3H6	protein_coding	0	false	-1.50212135232457	ENSG00000188177	376940	293.0	1	0.00163898589365106	0	false	0	ENSG00000188177	0
36.6562300655854	5.0	0.003610613923059028	0.2	0.0	9	2	CLEC17A	protein_coding	1	false	0.0744308191448598	ENSG00000187912	388512	1.5	1	0.970420371909075	0	false	0	ENSG00000187912	21294
45.6773279499831	9.0	0.041741810074993065	0.1111111111111111	0.0	17	3	RNASEK	protein_coding	2	false	0.538460068905541	ENSG00000219200	440400	2.3333333333333335	1	0.356880660796683	0	false	0	ENSG00000219200	246177
425.475379296279	3.0	0.0	0.3333333333333333	0.0	5	1	TLR5	protein_coding	0	false	2.48969618659188	ENSG00000187554	7100	3.0	1	1.29270900387669E-4	0	false	0	ENSG00000187554	0
30.0376569825957	3.0	0.0	0.3333333333333333	0.0	5	1	BCAM	protein_coding	0	false	-2.45688466712602	ENSG00000187244	4059	2.0	1	0.0436950275414091	0	false	0	ENSG00000187244	0
1055.27914168967	3.5	0.0	0.2857142857142857	0.0	6	1	LILRA5	protein_coding	0	false	2.20941358496634	ENSG00000187116	353514	3.0	1	0.00342674595468088	0	false	0	ENSG00000187116	0
8941.74898398799	12.5	0.07986690206137671	0.08	0.0	24	3	MT-CO1	protein_coding	2	false	-0.217901994445658	ENSG00000198804	4512	1.6666666666666667	1	0.736217739045324	0	false	0	ENSG00000198804	471024
201.255202228635	13.0	0.0	0.07692307692307693	0.0	25	1	GPR141	protein_coding	0	false	1.92864395063668	ENSG00000187037	353345	3.0	1	5.95247765805504E-4	0	false	0	ENSG00000187037	0
1193.35627389862	2.5	0.0	0.4	0.0	4	1	CYP4F3	protein_coding	0	false	2.0536831200176	ENSG00000186529	4051	2.0	1	0.0130412183747937	0	false	0	ENSG00000186529	0
2007.18162141612	21.0	0.0	0.047619047619047616	0.0	41	1	RPS23	protein_coding	0	false	-1.1868120074461	ENSG00000186468	6228	14.0	1	5.51232775744034E-4	0	false	0	ENSG00000186468	0
535.657210961647	5.0	0.0	0.2	0.0	9	1	FCAR	protein_coding	0	false	2.1272513583271	ENSG00000186431	2204	2.0	1	1.96510987092969E-4	0	false	0	ENSG00000186431	0
14.5472964818712	6.5	0.014259330725724243	0.15384615384615385	0.0	12	2	KLRC3	protein_coding	1	false	-0.260546525222792	ENSG00000205810	3823	3.0	1	0.907139834785269	0	false	0	ENSG00000205810	84096
11.1891157188645	4.0	0.0	0.25	0.0	7	1	NAP1L3	protein_coding	0	false	-2.12119224147008	ENSG00000186310	4675	4.0	1	0.0489333908517218	0	false	0	ENSG00000186310	0
61.6765097843056	10.5	0.007104570460043829	0.09523809523809523	0.0	20	2	SLC25A29	protein_coding	1	false	0.0522739004985122	ENSG00000197119	123096	2.5	1	0.9625885404176	0	false	0	ENSG00000197119	41900
373.529242382061	11.0	0.0	0.09090909090909091	0.0	21	1	MTARC1	protein_coding	0	false	2.59131096335088	ENSG00000186205	64757	2.0	1	2.5543824622694E-4	0	false	0	ENSG00000186205	0
325.237842771214	1.5	0.0	0.6666666666666666	0.0	2	1	POLR3C	protein_coding	0	false	-1.26327171639262	ENSG00000186141	10623	2.0	1	0.0270676505470336	0	false	0	ENSG00000186141	0
117.452162480868	3.0	0.0	0.3333333333333333	0.0	5	1	ZNF566	protein_coding	0	false	-1.83974775709281	ENSG00000186017	84924	2.0	1	0.0065437783879744	0	false	0	ENSG00000186017	0
137.518557080879	2.5	0.0	0.4	0.0	4	1	KLHDC8B	protein_coding	0	false	2.00040991339741	ENSG00000185909	200942	2.0	1	0.0135951786325643	0	false	0	ENSG00000185909	0
70.8356558644051	4.5	0.0060688970383267	0.2222222222222222	0.0	8	2	ATP6V0C	protein_coding	1	false	-1.43665517460139	ENSG00000185883	527	13.5	1	0.13274387948267	0	false	0	ENSG00000185883	35792
327.655955275755	10.0	0.0	0.1	0.0	19	1	TRIM69	protein_coding	0	false	1.23648245682395	ENSG00000185880	140691	4.0	1	0.0333080312821471	0	false	0	ENSG00000185880	0
1191.99630755217	8.0	0.0	0.1250	0.0	15	1	ZFP36L1	protein_coding	0	false	1.04600439982321	ENSG00000185650	677	3.0	1	0.0376944491704238	0	false	0	ENSG00000185650	0
514.466723238575	22.5	0.0	0.044444444444444446	0.0	44	1	IRF7	protein_coding	0	false	1.77833943348487	ENSG00000185507	3665	20.0	1	0.0203732029896912	0	false	0	ENSG00000185507	0
215.652059400911	4.5	0.0	0.2222222222222222	0.0	8	1	PARPBP	protein_coding	0	false	-2.09517322606836	ENSG00000185480	55010	2.0	1	0.00375682096525693	0	false	0	ENSG00000185480	0
166.733875441665	3.5	0.0	0.2857142857142857	0.0	6	1	GAS2L1	protein_coding	0	false	1.47134288926124	ENSG00000185340	10634	16.0	1	0.0234483104367178	0	false	0	ENSG00000185340	0
76.7843832863233	10.5	0.0	0.09523809523809523	0.0	20	1	TCN2	protein_coding	0	false	1.78112244614776	ENSG00000185339	6948	3.0	1	0.0219756089987427	0	false	0	ENSG00000185339	0
245.615857967282	2.0	0.0	0.5	0.0	3	1	KIAA0825	protein_coding	0	false	1.73828735941395	ENSG00000185261	285600	293.0	1	0.00951968272340711	0	false	0	ENSG00000185261	0
423.474267214006	11.0	0.0	0.09090909090909091	0.0	21	1	RAB11B	protein_coding	0	false	-1.59846823787905	ENSG00000185236	9230	5.0	1	0.0218379397968414	0	false	0	ENSG00000185236	0
454.649793052981	2.0	0.0	0.5	0.0	3	1	ZNF445	protein_coding	0	false	1.48004268424805	ENSG00000185219	353274	293.0	1	0.00163898589365106	0	false	0	ENSG00000185219	0
4901.97630056046	3.5	0.0	0.2857142857142857	0.0	6	1	IFITM2	protein_coding	0	false	1.99533892499883	ENSG00000185201	10581	2.0	1	0.021336538559062	0	false	0	ENSG00000185201	0
350.911013241712	2.0	0.0	0.5	0.0	3	1	FAF1	protein_coding	0	false	-1.28534699322342	ENSG00000185104	11124	293.0	1	0.0208359926256166	0	false	0	ENSG00000185104	0
97.5726046555914	5.5	0.0	0.18181818181818182	0.0	10	1	SLC24A3	protein_coding	0	false	1.5158540880309	ENSG00000185052	57419	2.0	1	0.0156490529457494	0	false	0	ENSG00000185052	0
2867.58881697448	13.0	0.02489990864098893	0.07692307692307693	0.0	25	2	ITGB3	protein_coding	1	false	2.48953064427954	ENSG00000259207	3690	4.0	1	0.00195925948837529	0	false	0	ENSG00000259207	146850
417.595325243804	16.0	0.0	0.0625	0.0	31	1	SEMA4B	protein_coding	0	false	1.25599658658222	ENSG00000185033	10509	7.0	1	0.00720042797783792	0	false	0	ENSG00000185033	0
209.063439937219	16.0	0.03521764402269936	0.0625	0.0	31	3	LRIG2	protein_coding	2	false	-0.220383461304487	ENSG00000198799	9860	3.6666666666666665	1	0.733137845990087	0	false	0	ENSG00000198799	207700
2231.90307597215	8.0	0.0	0.1250	0.0	15	1	FMNL1	protein_coding	0	false	1.00254805176408	ENSG00000184922	752	2.0	1	0.0185685139278219	0	false	0	ENSG00000184922	0
39.7353511451291	16.5	0.0	0.06060606060606061	0.0	32	1	IMMP2L	protein_coding	0	false	-1.25840296587194	ENSG00000184903	83943	4.0	1	0.0377016381449547	0	false	0	ENSG00000184903	0
3889.39881534537	2.5	0.0	0.4	0.0	4	1	RBM33	protein_coding	0	false	-1.70175372141536	ENSG00000184863	155435	10.0	1	0.0151738939067455	0	false	0	ENSG00000184863	0
157.366617011255	2.0	0.0	0.5	0.0	3	1	NELL2	protein_coding	0	false	-2.15377768761861	ENSG00000184613	4753	293.0	1	0.00401897174509924	0	false	0	ENSG00000184613	0
722.76218312115	7.0	0.0	0.14285714285714285	0.0	13	1	SOCS3	protein_coding	0	false	1.78940843848526	ENSG00000184557	9021	4.0	1	0.00120575090011968	0	false	0	ENSG00000184557	0
10.5020218328504	2.5	0.0	0.4	0.0	4	1	A3GALT2	protein_coding	0	false	3.01738836160589	ENSG00000184389	127550	3.0	1	0.0421056789336934	0	false	0	ENSG00000184389	0
102.953711019093	2.0	0.0	0.5	0.0	3	1	CSF1	protein_coding	0	false	2.21631137870686	ENSG00000184371	1435	293.0	1	0.00129089280407268	0	false	0	ENSG00000184371	0
192.070788815746	19.5	1.4597457411576076	0.05128205128205128	0.0	38	2	COMMD6	protein_coding	1	false	-0.770332511099131	ENSG00000188243	170622	5.0	1	0.106272100610917	0	false	0	ENSG00000188243	8609014
84.1721289250667	5.0	0.003322192100802834	0.2	0.0	9	2	CRELD2	protein_coding	1	false	-0.288658231960707	ENSG00000184164	79174	1.5	1	0.648524405158008	0	false	0	ENSG00000184164	19593
1493.61282063254	2.0	0.0	0.5	0.0	3	1	DENND5A	protein_coding	0	false	1.17916177311097	ENSG00000184014	23258	293.0	1	0.00705314577595528	0	false	0	ENSG00000184014	0
377.240749889185	3.0	0.00819653785294794	0.3333333333333333	0.0	5	2	ATXN7L3B	protein_coding	1	false	-0.315167444364467	ENSG00000253719	552889	5.0	1	0.317219363961459	0	false	0	ENSG00000253719	48340
2207.86997030028	3.5	0.007736012474201423	0.2857142857142857	0.0	6	2	PTP4A2	protein_coding	1	false	-0.0647248085503417	ENSG00000184007	8073	3.5	1	0.908691633820929	0	false	0	ENSG00000184007	45624
28.3634938019237	4.5	8.166017025195961E-4	0.2222222222222222	0.0	8	2	ADGRE4P	transcribed_unprocessed_pseudogene	1	false	-0.427633558830516	ENSG00000268758	326342	3.5	1	0.851134003326383	0	false	0	ENSG00000268758	4816
13.71315977921	5.5	0.0	0.18181818181818182	0.0	10	1	SCN5A	protein_coding	0	false	4.531803286282	ENSG00000183873	6331	2.0	1	0.0235680234161749	0	false	0	ENSG00000183873	0
104.834572908554	5.0	0.0	0.2	0.0	9	1	LIN9	protein_coding	0	false	-1.8446986744109	ENSG00000183814	286826	4.0	1	0.0366921905495634	0	false	0	ENSG00000183814	0
114.179829536287	19.5	0.0	0.05128205128205128	0.0	38	1	CHEK2	protein_coding	0	false	-1.6989494981641	ENSG00000183765	11200	8.0	1	0.0197486957670011	0	false	0	ENSG00000183765	0
511.949550225631	1.5	0.0	0.6666666666666666	0.0	2	1	KREMEN1	protein_coding	0	false	1.90070982308526	ENSG00000183762	83999	3.0	1	0.0158140014980343	0	false	0	ENSG00000183762	0
295.38158213039	8.5	0.0055805637942950475	0.11764705882352941	0.0	16	2	KLHL9	protein_coding	1	false	0.113605681805484	ENSG00000198642	55958	2.0	1	0.870508490980701	0	false	0	ENSG00000198642	32912
12.1304279239717	9.0	0.0	0.1111111111111111	0.0	17	1	NOG	protein_coding	0	false	-3.77280480458661	ENSG00000183691	9241	2.0	1	0.0165746617955017	0	false	0	ENSG00000183691	0
19.6701224815905	10.5	0.04602540824998322	0.09523809523809523	0.0	20	2	CCL3L3	protein_coding	1	false	0.573476630028431	ENSG00000276085		2.5	1	0.770872680273844	0	false	0	ENSG00000276085	271440
43.5572554452501	11.0	0.04100931020894559	0.09090909090909091	0.0	21	2	CCR3	protein_coding	1	false	1.02879403461797	ENSG00000183625	1232	3.0	1	0.441730046340834	0	false	0	ENSG00000183625	241857
262.911151863124	5.5	0.0	0.18181818181818182	0.0	10	1	ZNF438	protein_coding	0	false	1.22838096533566	ENSG00000183621	220929	6.0	1	0.0234839817387044	0	false	0	ENSG00000183621	0
61.9675943060274	16.5	0.5608724344700873	0.06060606060606061	0.0	32	2	MRPL54	protein_coding	1	false	-0.27371912957474	ENSG00000183617	116541	3.5	1	0.852607922651424	0	false	0	ENSG00000183617	3307808
33.8705615381664	6.0	0.050521634858312146	0.16666666666666666	0.0	11	4	SFXN4	protein_coding	3	false	-0.552024628767206	ENSG00000183605	119559	2.5	1	0.594442450144309	0	false	0	ENSG00000183605	297957
77.5987399916584	11.5	1.1106105318559445	0.08695652173913043	0.0	22	2	NDOR1	protein_coding	1	false	0.807106060644545	ENSG00000188566	27158	2.0	1	0.0676234428274934	0	false	0	ENSG00000188566	6549950
1368.03476590781	13.0	0.0	0.07692307692307693	0.0	25	1	MX2	protein_coding	0	false	1.46890036365861	ENSG00000183486	4600	11.0	1	0.0237460115056184	0	false	0	ENSG00000183486	0
54.928176814788	20.0	0.1878246653052117	0.05	0.0	39	2	GTF2H2C	protein_coding	1	false	0.271881622485276	ENSG00000183474	728340	4.0	1	0.682968579241151	0	false	0	ENSG00000183474	1107717
87.1271801013335	2.5	0.0	0.4	0.0	4	1	TMEM121B	protein_coding	0	false	1.54637330460835	ENSG00000183307	27439	2.0	1	0.0282208151538439	0	false	0	ENSG00000183307	0
60.4361283271641	27.0	0.3366682989657509	0.037037037037037035	0.0	53	2	SMDT1	protein_coding	1	false	-0.412840256171035	ENSG00000183172	91689	10.0	1	0.441109759581131	0	false	0	ENSG00000183172	1985539
540.772613676577	6.5	0.0	0.15384615384615385	0.0	12	1	CEP57L1	protein_coding	0	false	-1.69687296505026	ENSG00000183137	285753	4.0	1	0.0468123701607041	0	false	0	ENSG00000183137	0
29.1379116017205	15.5	0.0	0.06451612903225806	0.0	30	1	GAS6	protein_coding	0	false	1.65553111303189	ENSG00000183087	2621	5.0	1	0.0274294298855779	0	false	0	ENSG00000183087	0
23.4319219096888	8.0	0.0	0.1250	0.0	15	1	SLC25A21	protein_coding	0	false	-2.85388084154129	ENSG00000183032	89874	2.0	1	0.0172804377319099	0	false	0	ENSG00000183032	0
226.352169417154	9.0	0.0	0.1111111111111111	0.0	17	1	MCEMP1	protein_coding	0	false	3.12169061160019	ENSG00000183019	199675	3.0	1	9.07095083373497E-5	0	false	0	ENSG00000183019	0
271.683341508621	2.5	0.0	0.4	0.0	4	1	CNOT10	protein_coding	0	false	-1.06129958466652	ENSG00000182973	25904	10.0	1	0.0296758575765882	0	false	0	ENSG00000182973	0
1016.5720501023	2.0	0.0034539403405988733	0.5	0.0	3	4	EWSR1	protein_coding	3	false	0.267044059263416	ENSG00000182944	2130	74.0	1	0.22837950642469	0	false	0	ENSG00000182944	20370
1601.35690860399	8.0	0.0	0.1250	0.0	15	1	RPL35A	protein_coding	0	false	-1.28499712475192	ENSG00000182899	6165	3.0	1	0.00214038167462747	0	false	0	ENSG00000182899	0
871.616139487134	4.5	0.0	0.2222222222222222	0.0	8	1	ADGRG3	protein_coding	0	false	2.35236826869138	ENSG00000182885	222487	2.0	1	4.17434143028478E-4	0	false	0	ENSG00000182885	0
1731.30774426007	27.0	0.0	0.037037037037037035	0.0	53	1	LIMK2	protein_coding	0	false	2.09970112176932	ENSG00000182541	3985	2.0	1	1.29270900387669E-4	0	false	0	ENSG00000182541	0
164.876521316962	22.5	0.015189876851851225	0.044444444444444446	0.0	44	2	SMURF1	protein_coding	1	false	0.482788797416498	ENSG00000198742	57154	10.5	1	0.209476855749627	0	false	0	ENSG00000198742	89584
610.714595534056	23.0	0.0	0.043478260869565216	0.0	45	1	FES	protein_coding	0	false	1.38925555154775	ENSG00000182511	2242	2.0	1	7.85584773609406E-4	0	false	0	ENSG00000182511	0
287.663905990279	2.5	0.0	0.4	0.0	4	1	NCF1B	transcribed_unprocessed_pseudogene	0	false	1.64870871710955	ENSG00000182487	654816	5.0	1	0.0142659939649594	0	false	0	ENSG00000182487	0
168.711130767692	2.0	0.0	0.5	0.0	3	1	EXT1	protein_coding	0	false	1.44256815006252	ENSG00000182197	2131	13.0	1	0.00163506235890871	0	false	0	ENSG00000182197	0
180.422615716244	10.0	0.6821667820806117	0.1	0.0	19	2	ARHGAP19	protein_coding	1	false	0.838595337471219	ENSG00000213390	84986	6.0	1	0.0957014486873202	0	false	0	ENSG00000213390	4023155
1672.74221592496	2.0	0.0	0.5	0.0	3	1	CHST15	protein_coding	0	false	1.51429099696773	ENSG00000182022	51363	293.0	1	0.00601003020657826	0	false	0	ENSG00000182022	0
17.9265913070822	3.5	0.0	0.2857142857142857	0.0	6	1	OR52K2	protein_coding	0	false	3.13536534574577	ENSG00000181963	119774	5.0	1	0.0498722176390574	0	false	0	ENSG00000181963	0
161.00300703723	18.5	0.0	0.05405405405405406	0.0	36	1	MACIR	protein_coding	0	false	1.83293003195698	ENSG00000181751	90355	2.0	1	0.0399265257928412	0	false	0	ENSG00000181751	0
637.388678702129	18.5	0.03608782673393909	0.05405405405405406	0.0	36	2	RAP2B	protein_coding	1	false	-0.187306556535025	ENSG00000181467	5912	2.5	1	0.635308320115817	0	false	0	ENSG00000181467	212832
83.5168466512749	9.0	0.906095043214101	0.1111111111111111	0.0	17	2	WASH8P	unprocessed_pseudogene	1	false	-0.368555077992604	ENSG00000226210	100288778	3.0	1	0.779294291222203	0	false	0	ENSG00000226210	5343797
2466.14587701991	8.5	0.0	0.11764705882352941	0.0	16	1	DDX60L	protein_coding	0	false	1.61134701999892	ENSG00000181381	91351	2.0	1	0.00514974437755525	0	false	0	ENSG00000181381	0
1311.92224950085	26.5	0.0	0.03773584905660377	0.0	52	1	FRAT2	protein_coding	0	false	1.30833002077266	ENSG00000181274	23401	6.0	1	0.0306587547465834	0	false	0	ENSG00000181274	0
499.504908588021	1.5	0.0	0.6666666666666666	0.0	2	1	ZNF746	protein_coding	0	false	1.01227142145832	ENSG00000181220	155061	18.0	1	0.0152123557196103	0	false	0	ENSG00000181220	0
15.6195712339279	5.5	0.0037404970011591133	0.18181818181818182	0.0	10	2	RPH3AL	protein_coding	1	false	0.365912029498738	ENSG00000181031	9501	3.5	1	0.821806717925425	0	false	0	ENSG00000181031	22060
34.045765624179	2.0	0.0010967150772210855	0.5	0.0	3	2	FKRP	protein_coding	1	false	-0.0612210337210287	ENSG00000181027	79147	7.0	1	0.947745826819558	0	false	0	ENSG00000181027	6468
24.0018966143557	22.0	0.0	0.045454545454545456	0.0	43	1	LSMEM1	protein_coding	0	false	2.46003317054176	ENSG00000181016	286006	2.0	1	0.03062071646531	0	false	0	ENSG00000181016	0
78.2643517685119	2.5	0.0	0.4	0.0	4	1	ST20	protein_coding	0	false	2.11532765571586	ENSG00000180953	400410	4.0	1	0.00750136533251601	0	false	0	ENSG00000180953	0
22.604458776824	6.0	0.0	0.16666666666666666	0.0	11	1	OXTR	protein_coding	0	false	2.3135566015422	ENSG00000180914	5021	2.0	1	0.0409289436879716	0	false	0	ENSG00000180914	0
52.5670728339315	15.5	0.025367894666519265	0.06451612903225806	0.0	30	2	CUEDC1	protein_coding	1	false	0.536666753803861	ENSG00000180891	404093	2.5	1	0.486226164204338	0	false	0	ENSG00000180891	149610
20.6142966458957	4.0	0.0	0.25	0.0	7	1	LINC02363	lncRNA	0	false	2.26462440896068	ENSG00000180712	728175	2.0	1	0.0256818154735221	0	false	0	ENSG00000180712	0
84.8679011642182	25.0	0.028838621462381725	0.04	0.0	49	2	BLOC1S5	protein_coding	1	false	-0.515217630175695	ENSG00000188428	63915	3.5	1	0.547025895662708	0	false	0	ENSG00000188428	170079
94.2307526278464	2.5	0.0	0.4	0.0	4	1	FUT7	protein_coding	0	false	1.43721821237235	ENSG00000180549	2529	2.0	1	0.0468123701607041	0	false	0	ENSG00000180549	0
62.0267466041056	2.5	0.0	0.4	0.0	4	1	LINC02908	lncRNA	0	false	1.60633386006895	ENSG00000180539	401563	2.0	1	0.0243356857881736	0	false	0	ENSG00000180539	0
144.345503703596	29.5	0.0	0.03389830508474576	0.0	58	1	KCNE1	protein_coding	0	false	2.80995435377576	ENSG00000180509	3753	3.0	1	7.94649903718737E-5	0	false	0	ENSG00000180509	0
1079.36135210134	25.5	0.0	0.0392156862745098	0.0	50	1	CCDC66	protein_coding	0	false	-2.19239708468174	ENSG00000180376	285331	2.0	1	9.52397986567136E-4	0	false	0	ENSG00000180376	0
37.8062282602913	5.5	0.0	0.18181818181818182	0.0	10	1	PNPLA1	protein_coding	0	false	2.57173757299619	ENSG00000180316	285848	2.0	1	0.00201191913376412	0	false	0	ENSG00000180316	0
95.2319298830044	14.0	0.0	0.07142857142857142	0.0	27	1	FAHD1	protein_coding	0	false	-1.66277972585655	ENSG00000180185	81889	5.0	1	0.0372995412247656	0	false	0	ENSG00000180185	0
563.954737878307	4.5	0.0	0.2222222222222222	0.0	8	1	ABCA13	protein_coding	0	false	3.62089941259215	ENSG00000179869	154664	3.0	1	4.95354088614978E-4	0	false	0	ENSG00000179869	0
778.645808437263	2.0	0.0	0.5	0.0	3	1	PCBP1-AS1	lncRNA	0	false	1.21776784624338	ENSG00000179818	400960	11.0	1	0.0331386113397734	0	false	0	ENSG00000179818	0
106.993871083628	4.5	0.0	0.2222222222222222	0.0	8	1	PCED1B	protein_coding	0	false	-1.16147671558888	ENSG00000179715	91523	2.0	1	0.0150952424123772	0	false	0	ENSG00000179715	0
299.157371948118	12.5	0.008163304062729118	0.08	0.0	24	2	NUDT3	protein_coding	1	false	-0.114545472889721	ENSG00000272325	11165	1.5	1	0.867536934755922	0	false	0	ENSG00000272325	48144
1821.78013165845	13.0	0.0	0.07692307692307693	0.0	25	1	MAF1	protein_coding	0	false	-1.6478587115063	ENSG00000179632	84232	2.0	1	0.049158044485153	0	false	0	ENSG00000179632	0
762.221231809875	21.0	0.0	0.047619047619047616	0.0	41	1	SHARPIN	protein_coding	0	false	-1.65003335147261	ENSG00000179526	81858	14.0	1	0.0480592037034582	0	false	0	ENSG00000179526	0
604.473317958118	5.0	0.008246727658584526	0.2	0.0	9	2	ZBTB18	protein_coding	1	false	1.01105072891773	ENSG00000179456	10472	4.0	1	0.036731687648875	0	false	0	ENSG00000179456	48636
102.669569011521	23.0	0.0	0.043478260869565216	0.0	45	1	NSUN7	protein_coding	0	false	2.77236108705975	ENSG00000179299	79730	2.0	1	0.00211844843273977	0	false	0	ENSG00000179299	0
64.8487364831053	11.5	0.10485192989976283	0.08695652173913043	0.0	22	4	EDC3	protein_coding	3	false	-0.0305390476561085	ENSG00000179151	80153	3.0	1	0.971472918508578	0	false	0	ENSG00000179151	618376
854.979087319215	21.5	0.0	0.046511627906976744	0.0	42	1	CYBC1	protein_coding	0	false	1.32204576260087	ENSG00000178927	79415	13.0	1	1.08494960025683E-4	0	false	0	ENSG00000178927	0
99.5052357419307	2.5	0.0	0.4	0.0	4	1	OPLAH	protein_coding	0	false	2.65302399270007	ENSG00000178814	26873	2.0	1	1.83893704729848E-4	0	false	0	ENSG00000178814	0
2409.29788866372	9.5	0.0	0.10526315789473684	0.0	18	1	GRINA	protein_coding	0	false	-1.71747205340919	ENSG00000178719	2907	5.0	1	0.0176405039509603	0	false	0	ENSG00000178719	0
1120.7161694553	4.5	0.002951703163924653	0.2222222222222222	0.0	8	2	KCTD12	protein_coding	1	false	0.123490270889117	ENSG00000178695	115207	3.0	1	0.876818040203938	0	false	0	ENSG00000178695	17408
218.611183092422	22.0	0.0	0.045454545454545456	0.0	43	1	CD28	protein_coding	0	false	-1.37972274832123	ENSG00000178562	940	3.0	1	0.00636053697508461	0	false	0	ENSG00000178562	0
301.940266702387	2.0	0.0010148175227532772	0.5	0.0	3	2	H2BC9	protein_coding	1	false	-0.590134352379728	ENSG00000275713	8345	147.0	1	0.469206493696858	0	false	0	ENSG00000275713	5985
50.8172090006048	2.5	0.0	0.4	0.0	4	1	CEP295NL	protein_coding	0	false	1.46701505289375	ENSG00000178404	100653515	2.0	1	0.0126154454527711	0	false	0	ENSG00000178404	0
264.015369139442	4.5	0.4985814597501498	0.2222222222222222	0.0	8	2	ASB8	protein_coding	1	false	0.174132661574108	ENSG00000177981	140461	3.5	1	0.735905301692222	0	false	0	ENSG00000177981	2940440
3126.19688162622	21.0	0.0	0.047619047619047616	0.0	41	1	RPS27	protein_coding	0	false	-1.14465172664339	ENSG00000177954	6232	14.0	1	0.0131291032474813	0	false	0	ENSG00000177954	0
346.86183781914	2.5	0.0	0.4	0.0	4	1	CD151	protein_coding	0	false	1.82009999523353	ENSG00000177697	977	12.0	1	0.00406669713657492	0	false	0	ENSG00000177697	0
545.165281423898	2.0	0.0	0.5	0.0	3	1	AGTRAP	protein_coding	0	false	1.55781805885195	ENSG00000177674	57085	9.0	1	0.00364688962108495	0	false	0	ENSG00000177674	0
3230.1393987294	3.5	0.0	0.2857142857142857	0.0	6	1	IL17RA	protein_coding	0	false	1.36027422282965	ENSG00000177663	23765	5.0	1	0.00163506235890871	0	false	0	ENSG00000177663	0
201.830904961454	8.0	0.0	0.1250	0.0	15	1	GBA	protein_coding	0	false	1.41908902073317	ENSG00000177628	2629	4.0	1	5.71741947003404E-4	0	false	0	ENSG00000177628	0
2545.32503759389	2.0	0.0	0.5	0.0	3	1	RPLP2	protein_coding	0	false	-1.51612838112	ENSG00000177600	6181	293.0	1	1.92476760923246E-4	0	false	0	ENSG00000177600	0
234.554650428894	4.5	0.12521949561958298	0.2222222222222222	0.0	8	2	ZBTB33	protein_coding	1	false	-0.33074556852196	ENSG00000177485	10009	2.5	1	0.503992537402899	0	false	0	ENSG00000177485	738496
1488.16181170592	4.5	0.0	0.2222222222222222	0.0	8	1	SAMD9L	protein_coding	0	false	1.79330659193747	ENSG00000177409	219285	3.0	1	0.0154127653522838	0	false	0	ENSG00000177409	0
140.176133379349	10.5	0.0	0.09523809523809523	0.0	20	1	B3GNT8	protein_coding	0	false	1.61345423676209	ENSG00000177191	374907	3.0	1	0.0219756089987427	0	false	0	ENSG00000177191	0
2480.517786536	7.0	0.04474692468748368	0.14285714285714285	0.0	13	2	TALDO1	protein_coding	1	false	-0.0627290360409794	ENSG00000177156	6888	2.5	1	0.939979245926141	0	false	0	ENSG00000177156	263900
575.096297166066	5.0	0.0	0.2	0.0	9	1	ZBTB34	protein_coding	0	false	1.24141454867462	ENSG00000177125	403341	6.0	1	0.0211645580212597	0	false	0	ENSG00000177125	0
24.9079057529684	13.0	0.00969884081896198	0.07692307692307693	0.0	25	2	PHETA1	protein_coding	1	false	-0.117894127613981	ENSG00000198324	144717	2.0	1	0.929654965906055	0	false	0	ENSG00000198324	57200
56.1894674336072	21.5	0.014399726533383343	0.046511627906976744	0.0	42	2	TMEM80	protein_coding	1	false	-0.102139028558816	ENSG00000177042	283232	7.0	1	0.918902189815673	0	false	0	ENSG00000177042	84924
41.1306110338783	4.0	0.01361042401568635	0.25	0.0	7	2	SHMT1	protein_coding	1	false	-0.239159583299938	ENSG00000176974	6470	2.5	1	0.798194033031122	0	false	0	ENSG00000176974	80269
739.029276989887	2.0	0.0	0.5	0.0	3	1	BASP1	protein_coding	0	false	1.69775555184695	ENSG00000176788	10409	293.0	1	0.0405340436460045	0	false	0	ENSG00000176788	0
203.279839194416	15.0	0.031052398835325214	0.06666666666666667	0.0	29	2	ACSF3	protein_coding	1	false	-0.419685091801294	ENSG00000176715	197322	2.0	1	0.403750698703072	0	false	0	ENSG00000176715	183135
446.31466569874	8.0	0.0	0.1250	0.0	15	1	SLCO3A1	protein_coding	0	false	1.04569821914134	ENSG00000176463	28232	2.0	1	0.007981374011699	0	false	0	ENSG00000176463	0
457.114350824257	8.0	0.006183011022088262	0.1250	0.0	15	2	UPP1	protein_coding	1	false	1.62702936792642	ENSG00000183696	7378	2.0	1	3.22613979931652E-5	0	false	0	ENSG00000183696	36465
6.79229847899608	21.5	0.09114129583295748	0.046511627906976744	0.0	42	2	MAGIX	protein_coding	1	false	0.801255335704645	ENSG00000269313	79917	5.0	1	0.675252160686409	0	false	0	ENSG00000269313	537516
411.48937938972	2.5	0.0	0.4	0.0	4	1	ATAD5	protein_coding	0	false	-1.60605794795256	ENSG00000176208	79915	10.0	1	0.0293416129041071	0	false	0	ENSG00000176208	0
145.04931834684	14.5	0.0377535856885804	0.06896551724137931	0.0	28	2	TMEM39A	protein_coding	1	false	0.260238286649272	ENSG00000176142	55254	5.5	1	0.626974370600172	0	false	0	ENSG00000176142	222656
53.1281201988803	2.5	0.0	0.4	0.0	4	1	LRRN1	protein_coding	0	false	2.49290289242485	ENSG00000175928	57633	2.0	1	7.72859877339993E-4	0	false	0	ENSG00000175928	0
9.36712143669922	12.0	0.10744569157821844	0.08333333333333333	0.0	23	3	SFN	protein_coding	2	false	1.02123202788079	ENSG00000175793	2810	5.333333333333333	1	0.583646503457067	0	false	0	ENSG00000175793	633673
49.0848272620403	11.0	0.0	0.09090909090909091	0.0	21	1	LINC02915	lncRNA	0	false	-2.56136211223457	ENSG00000175746	400360	2.0	1	0.0294365656693333	0	false	0	ENSG00000175746	0
107.957390776275	2.0	0.0	0.5	0.0	3	1	B3GNTL1	protein_coding	0	false	1.57151080421362	ENSG00000175711	146712	7.0	1	0.00344665320850616	0	false	0	ENSG00000175711	0
147.842253389425	15.0	0.053534040557432404	0.06666666666666667	0.0	29	3	TOM1L2	protein_coding	2	false	-0.0904965581133826	ENSG00000175662	146691	2.3333333333333335	1	0.879324185898134	0	false	0	ENSG00000175662	315723
738.016016376688	2.5	0.0	0.4	0.0	4	1	MCTP1	protein_coding	0	false	1.44704894137801	ENSG00000175471	79772	10.0	1	0.00168088669617464	0	false	0	ENSG00000175471	0
334.163273340626	8.0	0.2960749198150031	0.1250	0.0	15	2	CTC1	protein_coding	1	false	0.0189355987197903	ENSG00000178971	80169	4.5	1	0.975225582946738	0	false	0	ENSG00000178971	1746135
252.902142892696	5.0	0.0	0.2	0.0	9	1	TP53I11	protein_coding	0	false	1.51132575400966	ENSG00000175274	9537	11.0	1	5.71741947003404E-4	0	false	0	ENSG00000175274	0
556.555217600704	24.0	0.13754261894475256	0.041666666666666664	0.0	47	3	ULK1	protein_coding	2	false	0.890745591011012	ENSG00000177169	8408	3.3333333333333335	1	0.0896521990144915	0	false	0	ENSG00000177169	811173
43.0769721297954	7.0	0.0	0.14285714285714285	0.0	13	1	SLC22A1	protein_coding	0	false	2.31071910645885	ENSG00000175003	6580	2.0	1	0.00842409269649963	0	false	0	ENSG00000175003	0
333.534066098554	4.0	0.0	0.25	0.0	7	1	RSRC1	protein_coding	0	false	-1.25285149752447	ENSG00000174891	51319	20.0	1	0.022555497025228	0	false	0	ENSG00000174891	0
423.313843513377	6.5	0.0	0.15384615384615385	0.0	12	1	CEP135	protein_coding	0	false	-1.60674148465429	ENSG00000174799	9662	4.0	1	8.90254684680371E-4	0	false	0	ENSG00000174799	0
4357.70482477248	1.5	0.0	0.6666666666666666	0.0	2	1	RPL4	protein_coding	0	false	-1.21341474285856	ENSG00000174444	6124	18.0	1	0.00161583476313203	0	false	0	ENSG00000174444	0
25.2086032287212	19.5	0.0	0.05128205128205128	0.0	38	1	ADCY6	protein_coding	0	false	2.41895704514606	ENSG00000174233	112	8.0	1	0.0444234333495181	0	false	0	ENSG00000174233	0
32.5152893961204	3.5	0.0	0.2857142857142857	0.0	6	1	KICS2	protein_coding	0	false	-1.29160128471397	ENSG00000174206	144577	3.0	1	0.0185394430837715	0	false	0	ENSG00000174206	0
588.341083614823	4.0	0.0	0.25	0.0	7	1	SELP	protein_coding	0	false	1.72270127908925	ENSG00000174175	6403	2.0	1	0.0371565136430959	0	false	0	ENSG00000174175	0
812.460451788926	15.5	0.0	0.06451612903225806	0.0	30	1	TLR6	protein_coding	0	false	1.46275003445285	ENSG00000174130	10333	4.0	1	0.0261096884792595	0	false	0	ENSG00000174130	0
70.3252326530535	19.5	0.0	0.05128205128205128	0.0	38	1	GNG5	protein_coding	0	false	1.32739480743301	ENSG00000174021	2787	8.0	1	0.0127017046328514	0	false	0	ENSG00000174021	0
14.620917263483	2.5	0.0	0.4	0.0	4	1	LRRC63	protein_coding	0	false	-2.88778201967832	ENSG00000173988	220416	2.0	1	0.0100225548353123	0	false	0	ENSG00000173988	0
281.264569244842	21.5	0.0	0.046511627906976744	0.0	42	1	UBXN2A	protein_coding	0	false	-1.8161502980766	ENSG00000173960	165324	3.0	1	0.00229012324431213	0	false	0	ENSG00000173960	0
191.641044974731	5.5	0.0	0.18181818181818182	0.0	10	1	SLCO4C1	protein_coding	0	false	1.14903077927329	ENSG00000173930	353189	2.0	1	0.0496580470331379	0	false	0	ENSG00000173930	0
182.619001195586	2.0	0.0	0.5	0.0	3	1	GOLIM4	protein_coding	0	false	-1.32127246368969	ENSG00000173905	27333	293.0	1	0.0124857579679802	0	false	0	ENSG00000173905	0
2438.71985754064	2.0	0.0	0.5	0.0	3	1	PHC3	protein_coding	0	false	-1.28360587322279	ENSG00000173889	80012	293.0	1	0.0223644245161589	0	false	0	ENSG00000173889	0
1900.00150343043	18.5	0.0	0.05405405405405406	0.0	36	1	STAT5B	protein_coding	0	false	1.13838090485285	ENSG00000173757	6777	8.0	1	0.00512649162461775	0	false	0	ENSG00000173757	0
1257.47211705532	6.0	0.0	0.16666666666666666	0.0	11	1	AGFG1	protein_coding	0	false	1.08055139241655	ENSG00000173744	3267	2.0	1	0.0195130929149796	0	false	0	ENSG00000173744	0
77728.1593814676	1.0	6.790884174815163E-4	1.0	0.0	1	3	MALAT1	lncRNA	2	false	0.601523160459483	ENSG00000251562	378938	11.0	1	0.152519622739178	0	false	0	ENSG00000251562	4005
45.1902113063681	1.5	0.0	0.6666666666666666	0.0	2	1	C11orf80	protein_coding	0	false	-1.50489676148043	ENSG00000173715	79703	3.0	1	0.0172628097968191	0	false	0	ENSG00000173715	0
420.037997137099	5.0	0.0	0.2	0.0	9	1	SLC19A1	protein_coding	0	false	1.46437134094351	ENSG00000173638	6573	8.0	1	0.00445994242275883	0	false	0	ENSG00000173638	0
1276.47179645447	4.5	0.0	0.2222222222222222	0.0	8	1	SULT1B1	protein_coding	0	false	2.17494668088456	ENSG00000173597	27284	2.0	1	0.00576667533196827	0	false	0	ENSG00000173597	0
2924.63192739535	3.5	0.0	0.2857142857142857	0.0	6	1	NABP1	protein_coding	0	false	1.80630419958403	ENSG00000173559	64859	5.0	1	0.00801295082694778	0	false	0	ENSG00000173559	0
1086.23150019896	5.5	0.0	0.18181818181818182	0.0	10	1	TNFRSF10C	protein_coding	0	false	1.70299325602511	ENSG00000173535	8794	2.0	1	0.0159115591941086	0	false	0	ENSG00000173535	0
769.671314048452	16.5	1.3982391517108959	0.06060606060606061	0.0	32	2	MAP3K11	protein_coding	1	false	0.849243796412382	ENSG00000173327	4296	2.0	1	0.0442043740993019	0	false	0	ENSG00000173327	8246272
953.109333855281	10.5	0.0	0.09523809523809523	0.0	20	1	PPP1R3B	protein_coding	0	false	2.20125568364937	ENSG00000173281	79660	2.0	1	0.00682402053054999	0	false	0	ENSG00000173281	0
94.7830137816603	13.5	0.0015385888390080597	0.07407407407407407	0.0	26	2	WDR73	protein_coding	1	false	-0.0613330274360913	ENSG00000177082	84942	2.0	1	0.949223905757117	0	false	0	ENSG00000177082	9074
239.593923408453	2.5	0.0	0.4	0.0	4	1	ABLIM3	protein_coding	0	false	1.62548761716543	ENSG00000173210	22885	7.0	1	0.0373609930694445	0	false	0	ENSG00000173210	0
2780.01747011423	2.0	0.0	0.5	0.0	3	1	PARP14	protein_coding	0	false	1.5247922369226	ENSG00000173193	54625	293.0	1	0.0370496906127562	0	false	0	ENSG00000173193	0
40.3059638838161	19.5	0.015148165053923522	0.05128205128205128	0.0	38	2	COMMD1	protein_coding	1	false	-0.197216342477338	ENSG00000173163	150684	2.5	1	0.841985196431843	0	false	0	ENSG00000173163	89338
167.462130573431	3.5	0.019030753464283512	0.2857142857142857	0.0	6	3	ESRRA	protein_coding	2	false	0.818897039541755	ENSG00000173153	2101	2.0	1	0.209373834861963	0	false	0	ENSG00000173153	112236
854.305946525744	2.0	0.0	0.5	0.0	3	1	HSPA6	protein_coding	0	false	2.22866693543677	ENSG00000173110	3310	293.0	1	0.00100292108293949	0	false	0	ENSG00000173110	0
529.131470154702	2.0	0.0	0.5	0.0	3	1	HPSE	protein_coding	0	false	1.59868746860152	ENSG00000173083	10855	13.0	1	0.013065311076374	0	false	0	ENSG00000173083	0
306.904541191936	2.0	0.0	0.5	0.0	3	1	MIR4435-2HG	lncRNA	0	false	1.02654104394012	ENSG00000172965	541471	11.0	1	0.0135757083090072	0	false	0	ENSG00000172965	0
841.521892755223	2.0	0.0	0.5	0.0	3	1	MYD88	protein_coding	0	false	1.13621778566193	ENSG00000172936	4615	15.0	1	0.00511270779581371	0	false	0	ENSG00000172936	0
714.142648037933	8.0	0.8102847389757075	0.1250	0.0	15	2	ANKRD13D	protein_coding	1	false	1.10803601192889	ENSG00000172932	338692	2.5	1	0.00633232501437094	0	false	0	ENSG00000172932	4778745
30.763524763137	2.0	0.0	0.5	0.0	3	1	EGFL7	protein_coding	0	false	1.60665956687011	ENSG00000172889	51162	13.0	1	0.0333641369593224	0	false	0	ENSG00000172889	0
105.557570743295	7.5	0.0	0.13333333333333333	0.0	14	1	SSH3	protein_coding	0	false	1.4565451538629	ENSG00000172830	54961	4.0	1	0.00238460736033379	0	false	0	ENSG00000172830	0
1602.07075067198	2.0	0.0	0.5	0.0	3	1	RPL38	protein_coding	0	false	-1.51614015460626	ENSG00000172809	6169	293.0	1	3.53048963290848E-5	0	false	0	ENSG00000172809	0
8.18077082454112	15.5	0.022325985500572097	0.06451612903225806	0.0	30	2	AMACR	protein_coding	1	false	0.0411974236892321	ENSG00000242110	23600	2.0	1	0.987242447712385	0	false	0	ENSG00000242110	131670
562.216016981609	16.0	0.012951682816706153	0.0625	0.0	31	2	PSME3IP1	protein_coding	1	false	-0.397866578082232	ENSG00000172775	80011	2.0	1	0.477669294313495	0	false	0	ENSG00000172775	76384
77.5583868302795	3.0	0.0016303208824181722	0.3333333333333333	0.0	5	2	FHL3	protein_coding	1	false	0.407326796489916	ENSG00000183386	2275	2.0	1	0.619648987263532	0	false	0	ENSG00000183386	9615
13.4542745014963	3.5	0.0	0.2857142857142857	0.0	6	1	EFCAB12	protein_coding	0	false	1.98190336957514	ENSG00000172771	90288	2.0	1	0.0498174031771445	0	false	0	ENSG00000172771	0
272.381820426864	4.5	0.0	0.2222222222222222	0.0	8	1	NAA16	protein_coding	0	false	-1.09080089114253	ENSG00000172766	79612	7.0	1	0.00338225122807296	0	false	0	ENSG00000172766	0
445.415220533754	4.0	0.0	0.25	0.0	7	1	KLHL6	protein_coding	0	false	1.12899323314862	ENSG00000172578	89857	2.0	1	0.00757503137035598	0	false	0	ENSG00000172578	0
123.334916658006	8.0	0.005857455526067161	0.1250	0.0	15	2	FIBP	protein_coding	1	false	0.047137496192963	ENSG00000172500	9158	4.0	1	0.961733694330903	0	false	0	ENSG00000172500	34545
480.397123061244	21.5	0.0	0.046511627906976744	0.0	42	1	GTPBP2	protein_coding	0	false	1.01984485441127	ENSG00000172432	54676	7.0	1	0.0219222284429008	0	false	0	ENSG00000172432	0
59.5215430950309	24.0	0.0	0.041666666666666664	0.0	47	1	AZU1	protein_coding	0	false	3.51325367307228	ENSG00000172232	566	5.0	1	0.0040432485656312	0	false	0	ENSG00000172232	0
89.6634590577458	18.5	0.0	0.05405405405405406	0.0	36	1	MTBP	protein_coding	0	false	-1.91899733901468	ENSG00000172167	27085	4.0	1	6.31732704919591E-4	0	false	0	ENSG00000172167	0
14.546078329488	1.0	3.7201497826577947E-4	1.0	0.0	1	2	SMN1	protein_coding	1	false	-0.156534749950173	ENSG00000172062	6606	16.0	1	0.923604367027447	0	false	0	ENSG00000172062	2194
4505.13140190218	3.0	0.0	0.3333333333333333	0.0	5	1	PTEN	protein_coding	0	false	1.04873643243035	ENSG00000171862	5728	4.0	1	0.0473359409964773	0	false	0	ENSG00000171862	0
570.110652102165	2.5	0.0	0.4	0.0	4	1	RPS21	protein_coding	0	false	-1.10299125251437	ENSG00000171858	6227	3.0	1	0.0274776832763732	0	false	0	ENSG00000171858	0
23.3487959393876	10.5	0.006483980295753603	0.09523809523809523	0.0	20	2	PIGP	protein_coding	1	false	-0.3901531459479	ENSG00000185808	51227	1.5	1	0.662072664166951	0	false	0	ENSG00000185808	38240
308.822606100555	11.0	0.0	0.09090909090909091	0.0	21	1	NINJ2	protein_coding	0	false	-2.02818277154561	ENSG00000171840	4815	2.0	1	0.0194844629519351	0	false	0	ENSG00000171840	0
11.9342709233939	5.0	0.007830118359770023	0.2	0.0	9	2	COL8A2	protein_coding	1	false	-0.145274498925615	ENSG00000171812	1296	2.5	1	0.948847856509957	0	false	0	ENSG00000171812	46179
136.378471724845	3.0	0.06077968506575204	0.3333333333333333	0.0	5	2	TPK1	protein_coding	1	false	0.434138065856025	ENSG00000196511	27010	2.5	1	0.528788748047137	0	false	0	ENSG00000196511	358455
718.482480278763	4.5	0.0	0.2222222222222222	0.0	8	1	RASGRP4	protein_coding	0	false	1.5692905687628	ENSG00000171777	115727	2.0	1	0.00186798024033439	0	false	0	ENSG00000171777	0
707.026321709525	2.0	0.0	0.5	0.0	3	1	CHD7	protein_coding	0	false	1.72217752455492	ENSG00000171316	55636	293.0	1	0.00214038167462747	0	false	0	ENSG00000171316	0
78.8907375282509	8.0	0.005033393176763748	0.1250	0.0	15	2	FAM98B	protein_coding	1	false	-0.751965237032635	ENSG00000171262	283742	2.5	1	0.059747081721414	0	false	0	ENSG00000171262	29685
292.967656041695	2.0	9.690362811253097E-4	0.5	0.0	3	2	CYCS	protein_coding	1	false	-0.21860219835111	ENSG00000172115	54205	147.0	1	0.682968579241151	0	false	0	ENSG00000172115	5715
571.488488117542	2.5	0.0	0.4	0.0	4	1	LRG1	protein_coding	0	false	2.22257329572547	ENSG00000171236	116844	2.0	1	0.00375682096525693	0	false	0	ENSG00000171236	0
74.7903632627909	21.5	0.0	0.046511627906976744	0.0	42	1	ZNF692	protein_coding	0	false	1.11322899019226	ENSG00000171163	55657	7.0	1	0.0463520379407724	0	false	0	ENSG00000171163	0
144.08121822624	6.5	0.00798017909621725	0.15384615384615385	0.0	12	2	DRAP1	protein_coding	1	false	0.120343390583111	ENSG00000175550	10589	2.0	1	0.864873844657592	0	false	0	ENSG00000175550	47064
4007.04905809992	13.0	0.0	0.07692307692307693	0.0	25	1	FPR1	protein_coding	0	false	1.97249054681196	ENSG00000171051	2357	6.0	1	0.00675999176833423	0	false	0	ENSG00000171051	0
1385.78103605059	4.5	0.0	0.2222222222222222	0.0	8	1	FPR2	protein_coding	0	false	2.01282532051566	ENSG00000171049	2358	5.0	1	0.00880014822582427	0	false	0	ENSG00000171049	0
382.288456907702	7.0	0.0	0.14285714285714285	0.0	13	1	CEACAM3	protein_coding	0	false	1.80492370150794	ENSG00000170956	1084	2.0	1	0.0305522733347528	0	false	0	ENSG00000170956	0
261.333340661659	2.0	0.0	0.5	0.0	3	1	TANC2	protein_coding	0	false	1.22330173694914	ENSG00000170921	26115	293.0	1	0.0468098509021096	0	false	0	ENSG00000170921	0
256.561008998381	19.0	0.0	0.05263157894736842	0.0	37	1	OSCAR	protein_coding	0	false	1.45983016218793	ENSG00000170909	126014	2.0	1	0.00255482352178151	0	false	0	ENSG00000170909	0
375.574465156985	9.0	0.0	0.1111111111111111	0.0	17	1	TSEN34	protein_coding	0	false	1.26268419426211	ENSG00000170892	79042	4.0	1	0.036538105952196	0	false	0	ENSG00000170892	0
102.969790480528	2.0	0.03960891289559232	0.5	0.0	3	2	RIOX2	protein_coding	1	false	-0.382368457422832	ENSG00000170854	84864	14.0	1	0.605265092040635	0	false	0	ENSG00000170854	233598
168.343305318606	29.5	0.0	0.03389830508474576	0.0	58	1	GPR27	protein_coding	0	false	1.80502706579596	ENSG00000170837	2850	2.0	1	0.0205272868137797	0	false	0	ENSG00000170837	0
112.326636642111	14.0	1.2744490481910307	0.07142857142857142	0.0	27	2	UNC119B	protein_coding	1	false	0.201698814359284	ENSG00000175970	84747	4.0	1	0.749562919891357	0	false	0	ENSG00000175970	7516206
271.471418285165	14.5	1.3126634983786658	0.06896551724137931	0.0	28	3	RNF34	protein_coding	2	false	0.465775795923305	ENSG00000170633	80196	3.6666666666666665	1	0.172591180906955	0	false	0	ENSG00000170633	7741580
11.0289990972138	7.5	0.028381656846872938	0.13333333333333333	0.0	14	3	TBCE	protein_coding	2	false	0.537002881502127	ENSG00000285053	6905	3.6666666666666665	1	0.635994710213629	0	false	0	ENSG00000285053	167384
1224.70131581213	2.0	0.0	0.5	0.0	3	1	PFKFB3	protein_coding	0	false	2.46428014722373	ENSG00000170525	5209	293.0	1	4.37871719169536E-5	0	false	0	ENSG00000170525	0
61.6718733501395	29.0	0.03772221706005753	0.034482758620689655	0.0	57	3	FAM241A	protein_coding	2	false	0.249558287996506	ENSG00000174749	132720	2.0	1	0.794811241723841	0	false	0	ENSG00000174749	222471
6.96069915091372	29.5	0.0	0.03389830508474576	0.0	58	1	METTL7B	protein_coding	0	false	3.69188557920351	ENSG00000170439	196410	3.0	1	0.0371677235153923	0	false	0	ENSG00000170439	0
387.109801337011	4.0	0.0015299412711449992	0.25	0.0	7	2	GYPB	protein_coding	1	false	-1.16482454211046	ENSG00000250361	2994	2.5	1	0.243523523189501	0	false	0	ENSG00000250361	9023
67.0013660855468	21.5	0.029383418237754536	0.046511627906976744	0.0	42	3	TMEM192	protein_coding	2	false	-0.6591686759926	ENSG00000170088	201931	3.0	1	0.167112201004144	0	false	0	ENSG00000170088	173292
323.572905417424	2.0	0.0	0.5	0.0	3	1	TPST1	protein_coding	0	false	2.72699432775487	ENSG00000169902	8460	293.0	1	6.40175518116374E-4	0	false	0	ENSG00000169902	0
2759.50501764192	2.0	0.0	0.5	0.0	3	1	ITGAM	protein_coding	0	false	1.46977896377945	ENSG00000169896	3684	9.0	1	7.73090639456493E-4	0	false	0	ENSG00000169896	0
787.747081215761	2.0	0.0	0.5	0.0	3	1	REPS2	protein_coding	0	false	1.6429104923378	ENSG00000169891	9185	293.0	1	0.0188988376664903	0	false	0	ENSG00000169891	0
643.216517242828	16.5	0.0	0.06060606060606061	0.0	32	1	CLIC4	protein_coding	0	false	1.23567885413553	ENSG00000169504	25932	2.0	1	0.0103399468066478	0	false	0	ENSG00000169504	0
1080.83301880592	5.0	0.04812066307515652	0.2	0.0	9	2	PTAFR	protein_coding	1	false	0.964434729288636	ENSG00000169403	5724	3.5	1	0.105460439510257	0	false	0	ENSG00000169403	283797
241.235441437639	2.5	0.0	0.4	0.0	4	1	RNASE2	protein_coding	0	false	2.34478207771877	ENSG00000169385	6036	2.0	1	0.042157982319135	0	false	0	ENSG00000169385	0
86.6074266009741	16.0	0.0	0.0625	0.0	31	1	THBS3	protein_coding	0	false	1.61409184076316	ENSG00000169231	7059	4.0	1	0.00241701819544918	0	false	0	ENSG00000169231	0
107.704940246275	5.5	0.0	0.18181818181818182	0.0	10	1	RAB24	protein_coding	0	false	1.24590551390918	ENSG00000169228	53917	3.0	1	0.0307239829488223	0	false	0	ENSG00000169228	0
815.543979506655	5.5	0.0	0.18181818181818182	0.0	10	1	RGS14	protein_coding	0	false	1.40940949815152	ENSG00000169220	10636	2.0	1	0.0147736544956779	0	false	0	ENSG00000169220	0
81.2879284281805	27.0	0.45926469900020556	0.037037037037037035	0.0	53	3	NSMCE1	protein_coding	2	false	0.0227895467751767	ENSG00000169189	197370	4.0	1	0.980708650772329	0	false	0	ENSG00000169189	2708565
4827.33837228884	22.5	0.0	0.044444444444444446	0.0	44	1	XPO6	protein_coding	0	false	1.68800810667789	ENSG00000169180	23214	20.0	1	0.00219699422377717	0	false	0	ENSG00000169180	0
35.1167837789269	4.5	0.0	0.2222222222222222	0.0	8	1	SPRY3	protein_coding	0	false	1.49442549027442	ENSG00000168939	10251	9.0	1	0.0192780699115914	0	false	0	ENSG00000168939	0
2141.09439452922	19.0	0.02533330439506702	0.05263157894736842	0.0	37	2	MME	protein_coding	1	false	1.32994665064568	ENSG00000196549	4311	2.0	1	0.352295592915632	0	false	0	ENSG00000196549	149406
1519.95364583054	19.5	0.013949713884195842	0.05128205128205128	0.0	38	2	INPP5D	protein_coding	1	false	0.395195592853456	ENSG00000168918	3635	1.5	1	0.285947257546687	0	false	0	ENSG00000168918	82270
313.000495775634	3.5	0.0	0.2857142857142857	0.0	6	1	ZNF608	protein_coding	0	false	3.62711982849237	ENSG00000168916	57507	2.0	1	3.96072995849324E-4	0	false	0	ENSG00000168916	0
106.864355545026	2.5	0.0	0.4	0.0	4	1	ADAL	protein_coding	0	false	-1.81144979161331	ENSG00000168803	161823	2.0	1	0.0212090428982381	0	false	0	ENSG00000168803	0
340.195428385282	2.0	0.0	0.5	0.0	3	1	ADAM9	protein_coding	0	false	1.44238971982147	ENSG00000168615	8754	293.0	1	0.00444774124251216	0	false	0	ENSG00000168615	0
2245.13634137045	2.0	0.0	0.5	0.0	3	1	STAT3	protein_coding	0	false	1.23399024887568	ENSG00000168610	6774	293.0	1	0.00198400392770372	0	false	0	ENSG00000168610	0
1777.24288905989	8.0	0.0	0.1250	0.0	15	1	RAB31	protein_coding	0	false	1.31368497148873	ENSG00000168461	11031	2.0	1	0.00742379782586068	0	false	0	ENSG00000168461	0
363.706465997416	2.5	0.0	0.4	0.0	4	1	MLKL	protein_coding	0	false	1.08429946174328	ENSG00000168404	197259	10.0	1	0.00265532518535784	0	false	0	ENSG00000168404	0
1559.32466755975	2.0	0.0	0.5	0.0	3	1	TAP1	protein_coding	0	false	1.19601192143624	ENSG00000168394	6890	293.0	1	0.0318008970815074	0	false	0	ENSG00000168394	0
4492.80997687569	14.0	0.0	0.07142857142857142	0.0	27	1	PCMTD1	protein_coding	0	false	-1.73241891376452	ENSG00000168300	115294	3.0	1	0.00377033589662282	0	false	0	ENSG00000168300	0
510.346382122092	15.5	0.0	0.06451612903225806	0.0	30	1	PXK	protein_coding	0	false	1.10462416955827	ENSG00000168297	54899	3.0	1	0.00486012687350391	0	false	0	ENSG00000168297	0
154.284581607732	13.0	0.199991962848692	0.07692307692307693	0.0	25	2	BTLA	protein_coding	1	false	-0.0625674171951251	ENSG00000186265	151888	2.0	1	0.932139539763186	0	false	0	ENSG00000186265	1179475
869.229615805346	5.5	0.0	0.18181818181818182	0.0	10	1	RBPJ	protein_coding	0	false	1.0752821539554	ENSG00000168214	3516	6.0	1	0.0193930484741474	0	false	0	ENSG00000168214	0
510.259952295159	15.5	0.0	0.06451612903225806	0.0	30	1	KIAA1586	protein_coding	0	false	-2.16165915553379	ENSG00000168116	57691	5.0	1	0.00145108596937226	0	false	0	ENSG00000168116	0
159.193295035583	9.5	0.02851255728589809	0.10526315789473684	0.0	18	2	TIMM23	protein_coding	1	false	-1.27651371865891	ENSG00000265354	100287932	2.5	1	0.0254843422236275	0	false	0	ENSG00000265354	168156
77.128721942625	10.0	0.02410755404051674	0.1	0.0	19	2	NUDT16L1	protein_coding	1	false	-0.30677729675722	ENSG00000168101	84309	2.5	1	0.657323697629762	0	false	0	ENSG00000168101	142177
572.006434445046	7.5	0.014183706896961008	0.13333333333333333	0.0	14	3	PAFAH1B2	protein_coding	2	false	0.374388717337617	ENSG00000168092	5049	2.6666666666666665	1	0.210122152189692	0	false	0	ENSG00000168092	83650
59.0015236787537	6.0	0.0	0.16666666666666666	0.0	11	1	BATF2	protein_coding	0	false	3.70160860926917	ENSG00000168062	116071	2.0	1	0.00185440523790775	0	false	0	ENSG00000168062	0
2248.3877470008	4.0	0.0	0.25	0.0	7	1	ATG16L2	protein_coding	0	false	1.48099089371103	ENSG00000168010	89849	2.0	1	5.32453102353087E-4	0	false	0	ENSG00000168010	0
385.422394537631	2.5	0.0	0.4	0.0	4	1	BEST1	protein_coding	0	false	1.67360090683123	ENSG00000167995	7439	2.0	1	0.0157389215132769	0	false	0	ENSG00000167995	0
475.46671126682	3.0	0.003144493059224649	0.3333333333333333	0.0	5	2	ZNF131	protein_coding	1	false	-1.32944359047857	ENSG00000172262	7690	2.5	1	0.0122792407967273	0	false	0	ENSG00000172262	18545
33.6678410920111	3.5	0.0018882218769223885	0.2857142857142857	0.0	6	2	TK1	protein_coding	1	false	-0.412937750846954	ENSG00000167900	7083	1.5	1	0.754985111668482	0	false	0	ENSG00000167900	11136
23.1891375254151	5.5	0.0	0.18181818181818182	0.0	10	1	TMEM88	protein_coding	0	false	2.21400517686448	ENSG00000167874	92162	2.0	1	0.0158043641200381	0	false	0	ENSG00000167874	0
833.441716427916	4.5	0.0	0.2222222222222222	0.0	8	1	CD300A	protein_coding	0	false	1.30892329242896	ENSG00000167851	11314	25.0	1	0.0219756089987427	0	false	0	ENSG00000167851	0
494.427329715854	15.5	0.5592280400948724	0.06451612903225806	0.0	30	2	RILP	protein_coding	1	false	-1.51706082898667	ENSG00000167705	83547	3.0	1	0.103959297146101	0	false	0	ENSG00000167705	3298110
141.55860916546	2.5	0.0	0.4	0.0	4	1	PLIN4	protein_coding	0	false	2.05341078714813	ENSG00000167676	729359	3.0	1	0.00195531282628008	0	false	0	ENSG00000167676	0
8465.19229862609	2.0	0.0	0.5	0.0	3	1	EEF2	protein_coding	0	false	-1.21105177332523	ENSG00000167658	1938	293.0	1	0.0187284243402238	0	false	0	ENSG00000167658	0
215.589296941717	25.0	0.0	0.04	0.0	49	1	DHRS13	protein_coding	0	false	1.22349213670217	ENSG00000167536	147015	3.0	1	0.0318008970815074	0	false	0	ENSG00000167536	0
3207.34501378632	1.5	0.0	0.6666666666666666	0.0	2	1	RPL13	protein_coding	0	false	-1.41266210012209	ENSG00000167526	6137	18.0	1	1.57786824569172E-4	0	false	0	ENSG00000167526	0
2244.39018635843	3.5	0.0	0.2857142857142857	0.0	6	1	TPM4	protein_coding	0	false	1.15240392487504	ENSG00000167460	7171	16.0	1	0.0366921905495634	0	false	0	ENSG00000167460	0
122.868761050862	2.5	0.0	0.4	0.0	4	1	CA4	protein_coding	0	false	2.25038810117461	ENSG00000167434	762	2.0	1	0.0317312154187181	0	false	0	ENSG00000167434	0
46.4639044132982	9.0	0.664574237844063	0.1111111111111111	0.0	17	5	TMEM242	protein_coding	4	false	-0.323386261530064	ENSG00000215712	729515	3.8	1	0.697288615840999	0	false	0	ENSG00000215712	3919401
54.026751243477	9.5	0.006656592532706458	0.10526315789473684	0.0	18	2	VKORC1	protein_coding	1	false	0.189646627614505	ENSG00000167397	79001	3.0	1	0.85699597978097	0	false	0	ENSG00000167397	39258
225.699911093188	10.0	0.0	0.1	0.0	19	1	CD3D	protein_coding	0	false	-1.22373912764212	ENSG00000167286	915	7.0	1	0.0126154454527711	0	false	0	ENSG00000167286	0
102.899501312869	6.5	0.0	0.15384615384615385	0.0	12	1	RNF214	protein_coding	0	false	-1.2789046336782	ENSG00000167257	257160	10.0	1	0.0194880849493955	0	false	0	ENSG00000167257	0
75.9185935429392	1.5	0.0	0.6666666666666666	0.0	2	1	LOXHD1	protein_coding	0	false	1.72537491823842	ENSG00000167210	125336	11.0	1	0.0229859759469858	0	false	0	ENSG00000167210	0
492.627213663325	33.0	0.0	0.030303030303030304	0.0	65	1	NOD2	protein_coding	0	false	1.2192556116128	ENSG00000167207	64127	6.0	1	0.0219756089987427	0	false	0	ENSG00000167207	0
161.024146403896	10.0	0.04688779119413078	0.1	0.0	19	2	ACBD6	protein_coding	1	false	-0.470887982524311	ENSG00000230124		2.0	1	0.521488887507927	0	false	0	ENSG00000230124	276526
79.3111319384766	10.5	0.04312932081662883	0.09523809523809523	0.0	20	2	URM1	protein_coding	1	false	-0.429937071611887	ENSG00000167118	81605	2.0	1	0.324215713130366	0	false	0	ENSG00000167118	254360
183.009644889377	8.0	0.0	0.1250	0.0	15	1	FAM102A	protein_coding	0	false	-1.36842593506925	ENSG00000167106	399665	2.0	1	0.0277454311656624	0	false	0	ENSG00000167106	0
59.7113461974818	4.5	0.0	0.2222222222222222	0.0	8	1	SAMD14	protein_coding	0	false	2.64534293322362	ENSG00000167100	201191	5.0	1	0.0260729098152177	0	false	0	ENSG00000167100	0
268.384930838195	6.0	0.0	0.16666666666666666	0.0	11	1	MBD6	protein_coding	0	false	1.03494923053723	ENSG00000166987	114785	5.0	1	0.0373104168521684	0	false	0	ENSG00000166987	0
199.193322050696	2.0	0.0	0.5	0.0	3	1	MAP1A	protein_coding	0	false	2.37717360148335	ENSG00000166963	4130	293.0	1	0.00143473446508633	0	false	0	ENSG00000166963	0
149.974067748668	21.5	0.1918254371430335	0.046511627906976744	0.0	42	2	MAFK	protein_coding	1	false	-0.0395439340640371	ENSG00000198517	7975	11.0	1	0.962507462815949	0	false	0	ENSG00000198517	1131312
1166.01440513726	10.0	0.0	0.1	0.0	19	1	STX3	protein_coding	0	false	1.76679730803794	ENSG00000166900	6809	8.0	1	0.0100142111177391	0	false	0	ENSG00000166900	0
113.256670597477	11.5	0.6249336171996395	0.08695652173913043	0.0	22	3	GLYCTK	protein_coding	2	false	0.378398142276045	ENSG00000168237	132158	3.0	1	0.548268094756049	0	false	0	ENSG00000168237	3685616
122.118981637225	12.0	0.0	0.08333333333333333	0.0	23	1	ATP23	protein_coding	0	false	-1.45197500006157	ENSG00000166896	91419	3.0	1	0.0390237988197678	0	false	0	ENSG00000166896	0
12.8469957222677	14.5	0.08123287866343191	0.06896551724137931	0.0	28	3	SRXN1	protein_coding	2	false	-1.76953277408367	ENSG00000271303	140809	2.6666666666666665	1	0.126250008827571	0	false	0	ENSG00000271303	479080
29.2642626390349	3.5	0.0014334615434179123	0.2857142857142857	0.0	6	2	PLK1	protein_coding	1	false	0.73920301204622	ENSG00000166851	5347	3.5	1	0.519074611471409	0	false	0	ENSG00000166851	8454
1049.69072571086	1.0	3.550589628480138E-4	1.0	0.0	1	2	TERF2IP	protein_coding	1	false	0.387521049429098	ENSG00000166848	54386	16.0	1	0.752084921259346	0	false	0	ENSG00000166848	2094
54.6449746546118	3.0	0.01749945571190509	0.3333333333333333	0.0	5	2	ZNF606	protein_coding	1	false	0.297082197335612	ENSG00000166704	80095	3.0	1	0.757106867792252	0	false	0	ENSG00000166704	103205
284.204831129394	18.5	0.01395412244820446	0.05405405405405406	0.0	36	2	BEX3	protein_coding	1	false	-0.100571123044066	ENSG00000166681	27018	3.0	1	0.928592350409286	0	false	0	ENSG00000166681	82296
1776.55674660041	2.0	9.939616237894253E-4	0.5	0.0	3	2	HSP90B1	protein_coding	1	false	0.208174187210299	ENSG00000166598	7184	147.0	1	0.811595983502027	0	false	0	ENSG00000166598	5862
215.368637144992	3.5	0.0	0.2857142857142857	0.0	6	1	TK2	protein_coding	0	false	1.15300480407481	ENSG00000166548	7084	3.0	1	0.0034154708372011	0	false	0	ENSG00000166548	0
277.052179777857	2.5	0.0	0.4	0.0	4	1	CLEC4D	protein_coding	0	false	1.75795974668118	ENSG00000166527	338339	12.0	1	0.0156490529457494	0	false	0	ENSG00000166527	0
904.576480829979	4.0	0.0	0.25	0.0	7	1	CLEC4E	protein_coding	0	false	2.6789847449099	ENSG00000166523	26253	13.0	1	6.05548717366042E-4	0	false	0	ENSG00000166523	0
63.8101829516848	17.0	0.0	0.058823529411764705	0.0	33	1	HDGFL3	protein_coding	0	false	-1.42957475414653	ENSG00000166503	50810	2.0	1	0.0199329752981146	0	false	0	ENSG00000166503	0
26.1888391505387	17.5	0.5721865053177456	0.05714285714285714	0.0	34	4	SPINDOC	protein_coding	3	false	0.204656359743041	ENSG00000168005	144097	4.0	1	0.861208766065178	0	false	0	ENSG00000168005	3374534
61.8377254028871	18.0	0.01204724895432253	0.05555555555555555	0.0	35	2	MAPK7	protein_coding	1	false	0.181259917946177	ENSG00000166484	5598	2.5	1	0.768761471665586	0	false	0	ENSG00000166484	71050
158.443010151579	3.0	0.09765223619322533	0.3333333333333333	0.0	5	2	EXOSC1	protein_coding	1	false	-0.391915157907668	ENSG00000171311	51013	4.0	1	0.383902589369394	0	false	0	ENSG00000171311	575915
123.051217143429	7.5	0.004356000360824008	0.13333333333333333	0.0	14	2	SERPINB8	protein_coding	1	false	0.228747090867168	ENSG00000166401	5271	3.5	1	0.683108894097935	0	false	0	ENSG00000166401	25690
868.38484759419	2.5	0.0	0.4	0.0	4	1	ILK	protein_coding	0	false	1.1302703560761	ENSG00000166333	3611	6.0	1	0.0185685139278219	0	false	0	ENSG00000166333	0
46.7147060034448	24.5	0.9298760243976715	0.04081632653061224	0.0	48	3	KIFBP	protein_coding	2	false	-0.153825028415289	ENSG00000198954	26128	2.0	1	0.89844643987995	0	false	0	ENSG00000198954	5484048
69.7725422421881	25.0	0.9188561404175114	0.04	0.0	49	2	PLEKHF1	protein_coding	1	false	-0.296758983414965	ENSG00000166289	79156	3.5	1	0.755230905195484	0	false	0	ENSG00000166289	5419057
71.4000266567273	25.0	0.0	0.04	0.0	49	1	BORCS7	protein_coding	0	false	-1.03399004580909	ENSG00000166275	119032	5.0	1	0.0333211155253424	0	false	0	ENSG00000166275	0
71.2154890656956	2.0	0.0	0.5	0.0	3	1	STXBP4	protein_coding	0	false	-1.14429038950091	ENSG00000166263	252983	293.0	1	0.0447472229296914	0	false	0	ENSG00000166263	0
818.511562222547	2.0	0.0	0.5	0.0	3	1	CCT2	protein_coding	0	false	-1.34253865663803	ENSG00000166226	10576	293.0	1	0.0126104796523037	0	false	0	ENSG00000166226	0
189.884929497615	1.0	0.003881062368972391	1.0	0.0	1	11	NOLC1	protein_coding	10	false	-0.251437869490376	ENSG00000166197	9221	3.727272727272727	1	0.521000533591394	0	false	0	ENSG00000166197	22889
182.176517831212	2.0	0.0	0.5	0.0	3	1	ZNF319	protein_coding	0	false	1.28570061350279	ENSG00000166188	57567	293.0	1	0.0131291032474813	0	false	0	ENSG00000166188	0
243.37691218045	2.0	0.0	0.5	0.0	3	1	CMTM5	protein_coding	0	false	1.57133358711271	ENSG00000166091	116173	9.0	1	0.0427539700938732	0	false	0	ENSG00000166091	0
25.9931238207	2.0	0.0	0.5	0.0	3	1	ABTB2	protein_coding	0	false	1.89768997314911	ENSG00000166016	25841	293.0	1	0.0411322682534886	0	false	0	ENSG00000166016	0
27.574856302754	8.0	0.16471582057280135	0.1250	0.0	15	3	WBP1	protein_coding	2	false	0.0955854575809954	ENSG00000239779	23559	3.3333333333333335	1	0.915043448489463	0	false	0	ENSG00000239779	971430
83.9187552169454	10.5	1.0298880292565873	0.09523809523809523	0.0	20	3	TRIM39	protein_coding	2	false	0.631020532403533	ENSG00000204599	56658	2.3333333333333335	1	0.330603722940945	0	false	0	ENSG00000204599	6073880
143.449791584141	11.0	0.0	0.09090909090909091	0.0	21	1	MOAP1	protein_coding	0	false	-1.31644404986385	ENSG00000165943	64112	3.0	1	1.92476760923246E-4	0	false	0	ENSG00000165943	0
78.8874537701246	2.0	0.0	0.5	0.0	3	1	ARHGAP42	protein_coding	0	false	-1.58624860926481	ENSG00000165895	143872	293.0	1	0.0315730091860461	0	false	0	ENSG00000165895	0
55.3876269929567	9.0	0.0	0.1111111111111111	0.0	17	1	UBTD1	protein_coding	0	false	1.61333501502059	ENSG00000165886	80019	6.0	1	0.0176405039509603	0	false	0	ENSG00000165886	0
485.398004619111	3.5	0.0	0.2857142857142857	0.0	6	1	FRAT1	protein_coding	0	false	1.59852369051394	ENSG00000165879	10023	3.0	1	0.00418377821870628	0	false	0	ENSG00000165879	0
713.595209555789	2.0	0.0	0.5	0.0	3	1	ARHGEF40	protein_coding	0	false	1.32543938607105	ENSG00000165801	55701	293.0	1	0.0276698228210921	0	false	0	ENSG00000165801	0
85.6140354404465	7.0	0.0048979146135758	0.14285714285714285	0.0	13	2	KLHL11	protein_coding	1	false	-0.500135265607259	ENSG00000178502	55175	2.0	1	0.483375647161235	0	false	0	ENSG00000178502	28886
12.8157302296082	7.5	0.0010136306016740335	0.13333333333333333	0.0	14	2	NDRG2	protein_coding	1	false	-0.974612734399631	ENSG00000165795	57447	2.0	1	0.513470169001778	0	false	0	ENSG00000165795	5978
453.493856207806	9.0	0.031056298718871302	0.1111111111111111	0.0	17	2	FUNDC2	protein_coding	1	false	-1.11401494931213	ENSG00000165775	65991	4.0	1	0.141996924288212	0	false	0	ENSG00000165775	183158
446.560486202935	4.5	0.0028852355834870116	0.2222222222222222	0.0	8	2	TSC1	protein_coding	1	false	0.0628748965116441	ENSG00000165699	7248	5.0	1	0.913494052867402	0	false	0	ENSG00000165699	17016
957.874889202359	2.0	0.0010031178721150189	0.5	0.0	3	2	GHITM	protein_coding	1	false	0.0672310172363494	ENSG00000165678	27069	2.5	1	0.943844409616852	0	false	0	ENSG00000165678	5916
609.297375223606	2.0	0.0	0.5	0.0	3	1	ATP5F1C	protein_coding	0	false	-1.13217432418224	ENSG00000165629	509	293.0	1	0.0156490529457494	0	false	0	ENSG00000165629	0
32.6387821356606	6.5	0.0	0.15384615384615385	0.0	12	1	BEND7	protein_coding	0	false	2.15824093102629	ENSG00000165626	222389	5.0	1	0.0373095666355269	0	false	0	ENSG00000165626	0
915.361532352783	4.5	0.0	0.2222222222222222	0.0	8	1	NEMF	protein_coding	0	false	-1.0697226282594	ENSG00000165525	9147	7.0	1	0.0165309275810828	0	false	0	ENSG00000165525	0
269.730415796444	7.0	0.0	0.14285714285714285	0.0	13	1	KLHDC2	protein_coding	0	false	-1.11708080016195	ENSG00000165516	23588	6.0	1	0.0139623004195418	0	false	0	ENSG00000165516	0
10.3954843903976	2.5	0.0	0.4	0.0	4	1	DEPP1	protein_coding	0	false	3.04891710734354	ENSG00000165507	11067	2.0	1	0.043072528624882	0	false	0	ENSG00000165507	0
172.816462377053	14.0	0.0	0.07142857142857142	0.0	27	1	LRR1	protein_coding	0	false	-1.91122773584445	ENSG00000165501	122769	2.0	1	0.00179745062178147	0	false	0	ENSG00000165501	0
8.94183948941795	13.0	1.2216597158307465	0.07692307692307693	0.0	25	3	CENPW	protein_coding	2	false	0.0418880111463939	ENSG00000203760	387103	3.6666666666666665	1	0.986065086651289	0	false	0	ENSG00000203760	7204875
1073.40776074926	13.5	0.0	0.07407407407407407	0.0	26	1	SKA3	protein_coding	0	false	-2.16927569738016	ENSG00000165480	221150	3.0	1	0.00661869532042734	0	false	0	ENSG00000165480	0
377.348790977406	13.0	0.0	0.07692307692307693	0.0	25	1	WRN	protein_coding	0	false	-1.45960497873225	ENSG00000165392	7486	3.0	1	0.0323721018154671	0	false	0	ENSG00000165392	0
164.390284576922	4.5	0.0	0.2222222222222222	0.0	8	1	MELK	protein_coding	0	false	-1.91483182940174	ENSG00000165304	9833	5.0	1	0.0121225370688613	0	false	0	ENSG00000165304	0
95.7958510757519	2.0	0.0	0.5	0.0	3	1	KIAA1958	protein_coding	0	false	1.58752129120947	ENSG00000165185	158405	293.0	1	0.0096033494006947	0	false	0	ENSG00000165185	0
3912.00862749682	2.0	0.0011363921532986571	0.5	0.0	3	2	CYBB	protein_coding	1	false	0.418604108499917	ENSG00000165168	1536	2.0	1	0.626829839848509	0	false	0	ENSG00000165168	6702
61.8322977561191	4.0	0.0027631522724790984	0.25	0.0	7	2	FBP1	protein_coding	1	false	0.28298939102221	ENSG00000165140	2203	7.0	1	0.821807490146752	0	false	0	ENSG00000165140	16296
3086.49291791433	2.0	0.0012142202640662019	0.5	0.0	3	2	HNRNPK	protein_coding	1	false	-0.0539416635840278	ENSG00000165119	3190	147.0	1	0.922624579599573	0	false	0	ENSG00000165119	7161
266.871475598303	6.5	0.0	0.15384615384615385	0.0	12	1	KIF27	protein_coding	0	false	1.80188266158532	ENSG00000165115	55582	2.0	1	0.0365436110700062	0	false	0	ENSG00000165115	0
191.969941787836	13.5	0.0	0.07407407407407407	0.0	26	1	GKAP1	protein_coding	0	false	-1.91951960793832	ENSG00000165113	80318	2.0	1	0.00238460736033379	0	false	0	ENSG00000165113	0
101.547734848209	2.5	0.0026315735928372367	0.4	0.0	4	3	TMX2	protein_coding	2	false	-0.151245446423091	ENSG00000213593	51075	2.3333333333333335	1	0.84499071721976	0	false	0	ENSG00000213593	15520
856.247360382121	3.0	0.0	0.3333333333333333	0.0	5	1	TMEM71	protein_coding	0	false	1.03751546171365	ENSG00000165071	137835	3.0	1	0.0468809109061872	0	false	0	ENSG00000165071	0
471.988328048187	2.0	0.0	0.5	0.0	3	1	NFIL3	protein_coding	0	false	1.57825779555547	ENSG00000165030	4783	293.0	1	0.0243833782348996	0	false	0	ENSG00000165030	0
273.862360993523	23.0	0.013513096487188375	0.043478260869565216	0.0	45	2	SNTB2	protein_coding	1	false	0.31112985536887	ENSG00000168807	6645	2.0	1	0.532339627636547	0	false	0	ENSG00000168807	79695
1346.80635297364	23.5	0.0	0.0425531914893617	0.0	46	1	ABCA1	protein_coding	0	false	2.41155460579561	ENSG00000165029	19	2.0	1	5.00830336336971E-4	0	false	0	ENSG00000165029	0
34.696291061814	13.0	0.007528470845487971	0.07692307692307693	0.0	25	2	RPP25L	protein_coding	1	false	0.34176190232021	ENSG00000164967	138716	2.0	1	0.797508377086154	0	false	0	ENSG00000164967	44400
1089.22288299627	5.0	0.0	0.2	0.0	9	1	TP53INP1	protein_coding	0	false	1.2629518470471	ENSG00000164938	94241	6.0	1	0.0191049657665779	0	false	0	ENSG00000164938	0
26.0300454518616	13.0	0.0667897447305791	0.07692307692307693	0.0	25	2	GPR52	protein_coding	1	false	0.907999793960039	ENSG00000203737	9293	3.0	1	0.290830199596967	0	false	0	ENSG00000203737	393900
23.3927459684654	9.0	0.0050905349487216185	0.1111111111111111	0.0	17	2	GPR35	protein_coding	1	false	-0.551630297444189	ENSG00000178623	2859	3.5	1	0.560804114030136	0	false	0	ENSG00000178623	30022
676.710573961707	9.5	0.0	0.10526315789473684	0.0	18	1	GPR146	protein_coding	0	false	-2.22674777026657	ENSG00000164849	115330	2.0	1	0.0328594507154013	0	false	0	ENSG00000164849	0
79.5768567129354	11.0	0.3253433762682252	0.09090909090909091	0.0	21	2	CMKLR1	protein_coding	1	false	-0.314410064158178	ENSG00000174600	1240	4.5	1	0.802162305074535	0	false	0	ENSG00000174600	1918749
145.616055173203	5.0	0.0	0.2	0.0	9	1	ORC5	protein_coding	0	false	-1.45100276591065	ENSG00000164815	5001	3.0	1	0.00179745062178147	0	false	0	ENSG00000164815	0
396.120849823222	7.5	0.0	0.13333333333333333	0.0	14	1	BRI3	protein_coding	0	false	1.24580358558037	ENSG00000164713	25798	3.0	1	0.0194844629519351	0	false	0	ENSG00000164713	0
177.744220533263	3.0	0.015741964713853675	0.3333333333333333	0.0	5	4	NELFE	protein_coding	3	false	-0.0471983902694229	ENSG00000204356	7936	2.5	1	0.947745826819558	0	false	0	ENSG00000204356	92840
210.727300607686	3.5	0.013680452359361722	0.2857142857142857	0.0	6	2	BMT2	protein_coding	1	false	0.391550608538145	ENSG00000164603	154743	2.5	1	0.388608780163218	0	false	0	ENSG00000164603	80682
2499.16958433966	2.0	0.0	0.5	0.0	3	1	RPS14	protein_coding	0	false	-1.18706400900691	ENSG00000164587	6208	293.0	1	0.00214038167462747	0	false	0	ENSG00000164587	0
219.119087318089	7.0	0.004767861975321537	0.14285714285714285	0.0	13	2	FEZ2	protein_coding	1	false	0.868953639795728	ENSG00000171055	9637	2.0	1	0.0181132783742705	0	false	0	ENSG00000171055	28119
254.678339402927	7.5	9.614060741873152E-4	0.13333333333333333	0.0	14	2	SAP30L	protein_coding	1	false	0.57141180751188	ENSG00000164576	79685	2.0	1	0.193420745808936	0	false	0	ENSG00000164576	5670
1091.49064226593	2.0	0.0	0.5	0.0	3	1	STXBP5	protein_coding	0	false	1.26472498828641	ENSG00000164506	134957	293.0	1	0.0302151982959298	0	false	0	ENSG00000164506	0
8.74392299364875	5.5	0.4755416260004897	0.18181818181818182	0.0	10	2	NEFL	protein_coding	1	false	-1.31072814495531	ENSG00000277586	4747	5.0	1	0.405373032738563	0	false	0	ENSG00000277586	2804560
10.7484065873619	6.0	0.5198224298241391	0.16666666666666666	0.0	11	4	TXLNB	protein_coding	3	false	0.3570825632662	ENSG00000164440	167838	3.75	1	0.806069950523412	0	false	0	ENSG00000164440	3065711
280.901945501889	2.0	0.0	0.5	0.0	3	1	NSA2	protein_coding	0	false	-1.13218327716205	ENSG00000164346	10412	25.0	1	0.0361050097267471	0	false	0	ENSG00000164346	0
776.354248597101	26.0	0.0	0.038461538461538464	0.0	51	1	RHOBTB3	protein_coding	0	false	-1.82326988277764	ENSG00000164292	22836	4.0	1	0.0219756089987427	0	false	0	ENSG00000164292	0
102.451155642993	1.5	7.891329575428157E-4	0.6666666666666666	0.0	2	2	AGGF1	protein_coding	1	false	-0.0327636632238713	ENSG00000164252	55109	4.0	1	0.956944982888216	0	false	0	ENSG00000164252	4654
121.127012213647	2.0	0.0	0.5	0.0	3	1	ANKRD33B	protein_coding	0	false	1.80930516560104	ENSG00000164236	651746	293.0	1	0.00350848282394644	0	false	0	ENSG00000164236	0
199.641057252672	5.0	0.002963572374717089	0.2	0.0	9	2	TMEM184C	protein_coding	1	false	0.274610110448085	ENSG00000164168	55751	2.5	1	0.66508442659107	0	false	0	ENSG00000164168	17478
64.5581951039415	6.0	0.0	0.16666666666666666	0.0	11	1	TMEM144	protein_coding	0	false	1.77860445795543	ENSG00000164124	55314	2.0	1	0.00877377549318293	0	false	0	ENSG00000164124	0
165.212331840631	3.5	0.002053034346783071	0.2857142857142857	0.0	6	2	CEP44	protein_coding	1	false	-0.0194776587020101	ENSG00000164118	80817	3.0	1	0.978369471005796	0	false	0	ENSG00000164118	12108
21.4826754173274	11.5	0.008322351487347762	0.08695652173913043	0.0	22	2	MAP9	protein_coding	1	false	-0.591090548915819	ENSG00000164114	79884	1.5	1	0.546358575450792	0	false	0	ENSG00000164114	49082
1274.37528084524	6.5	0.0	0.15384615384615385	0.0	12	1	HMGB2	protein_coding	0	false	1.89382151217896	ENSG00000164104	3148	5.0	1	5.71741947003404E-4	0	false	0	ENSG00000164104	0
651.413940887781	7.5	0.00469308594732919	0.13333333333333333	0.0	14	2	C4orf3	protein_coding	1	false	0.580605585008399	ENSG00000164096	401152	2.5	1	0.201247692786879	0	false	0	ENSG00000164096	27678
10.8817909814173	25.0	0.016724904927621555	0.04	0.0	49	2	POC1A	protein_coding	1	false	0.279648912002622	ENSG00000164087	25886	3.0	1	0.873536281030888	0	false	0	ENSG00000164087	98637
935.205557826376	5.0	0.04712568409044203	0.2	0.0	9	2	FAR1	protein_coding	1	false	0.871087088994484	ENSG00000197601	84188	3.5	1	0.0672821156733864	0	false	0	ENSG00000197601	277929
99.5622621812645	5.5	0.049408133325827476	0.18181818181818182	0.0	10	2	DUSP7	protein_coding	1	false	-0.571198732326165	ENSG00000164086	1849	3.0	1	0.211537593245659	0	false	0	ENSG00000164086	291390
120.541696227981	4.0	0.0024201320805776983	0.25	0.0	7	2	TEX264	protein_coding	1	false	-0.00163442449132171	ENSG00000164081	51368	4.5	1	0.9986373962671	0	false	0	ENSG00000164081	14273
87.538172856049	14.5	0.0	0.06896551724137931	0.0	28	1	ATRIP	protein_coding	0	false	-1.51098752098427	ENSG00000164053	84126	5.0	1	0.0120076941797914	0	false	0	ENSG00000164053	0
27.003090173717	28.5	0.36748975687108615	0.03508771929824561	0.0	56	2	BDH2	protein_coding	1	false	-1.43353905639249	ENSG00000164039	56898	3.5	1	0.178104266980714	0	false	0	ENSG00000164039	2167312
255.75331434815	5.0	0.003279462941950064	0.2	0.0	9	2	EPM2AIP1	protein_coding	1	false	0.0990405624040154	ENSG00000178567	9852	3.0	1	0.869523656447817	0	false	0	ENSG00000178567	19341
396.687902411279	26.5	0.0	0.03773584905660377	0.0	52	1	S100P	protein_coding	0	false	2.38734787709378	ENSG00000163993	6286	6.0	1	0.0284170886352589	0	false	0	ENSG00000163993	0
3608.00481823674	25.5	0.014709343374911745	0.0392156862745098	0.0	50	2	YOD1	protein_coding	1	false	0.113853920670813	ENSG00000180667	55432	1.5	1	0.941624815518453	0	false	0	ENSG00000180667	86750
29.4936487915719	26.0	0.0	0.038461538461538464	0.0	51	1	ZDHHC19	protein_coding	0	false	4.1100408967528	ENSG00000163958	131540	2.0	1	0.016793143681884	0	false	0	ENSG00000163958	0
737.823019165405	7.5	0.0	0.13333333333333333	0.0	14	1	PRKCD	protein_coding	0	false	1.45714727908814	ENSG00000163932	5580	4.0	1	4.76770144789168E-4	0	false	0	ENSG00000163932	0
111.942081621523	14.5	0.11660312682489117	0.06896551724137931	0.0	28	2	PRIM1	protein_coding	1	false	-1.40067138348406	ENSG00000198056	5557	3.0	1	0.0381037378601884	0	false	0	ENSG00000198056	687680
183.771644023954	22.5	0.0	0.044444444444444446	0.0	44	1	ZC3H12A	protein_coding	0	false	1.30635550379722	ENSG00000163874	80149	20.0	1	0.0294365656693333	0	false	0	ENSG00000163874	0
872.845158997025	30.0	0.3093452061614091	0.03333333333333333	0.0	59	3	PLEKHO2	protein_coding	2	false	1.27127261280667	ENSG00000241839	80301	5.0	1	0.00529599396211015	0	false	0	ENSG00000241839	1824398
1169.56136912747	15.5	0.0	0.06451612903225806	0.0	30	1	DTX3L	protein_coding	0	false	1.20911843106423	ENSG00000163840	151636	6.0	1	0.0366910241213821	0	false	0	ENSG00000163840	0
486.217934388107	2.0	0.0	0.5	0.0	3	1	KIF15	protein_coding	0	false	-2.07977153677044	ENSG00000163808	56992	293.0	1	0.0092589664063817	0	false	0	ENSG00000163808	0
100.906433258436	8.5	0.02208894040503173	0.11764705882352941	0.0	16	4	TSEN15	protein_coding	3	false	-0.340493437458449	ENSG00000198860	116461	1.75	1	0.312369585376096	0	false	0	ENSG00000198860	130272
253.600486907667	9.0	0.0	0.1111111111111111	0.0	17	1	PLB1	protein_coding	0	false	1.57647271154038	ENSG00000163803	151056	4.0	1	0.0452943572023105	0	false	0	ENSG00000163803	0
529.141174333815	7.0	0.0	0.14285714285714285	0.0	13	1	GYG1	protein_coding	0	false	1.87318156085474	ENSG00000163754	2992	3.0	1	2.70005249560194E-4	0	false	0	ENSG00000163754	0
46.2752509550867	7.0	0.06294547691506325	0.14285714285714285	0.0	13	2	CCNQ	protein_coding	1	false	-0.481436302067291	ENSG00000262919	92002	2.0	1	0.60057954046476	0	false	0	ENSG00000262919	371228
461.790642738165	7.5	0.06369493279652849	0.13333333333333333	0.0	14	2	TTC14	protein_coding	1	false	-0.00830285276399619	ENSG00000163728	151613	2.5	1	0.991720774976853	0	false	0	ENSG00000163728	375648
416.471876919921	4.0	0.018683324708373493	0.25	0.0	7	3	CHURC1	protein_coding	2	false	0.377037291223852	ENSG00000258289	91612	7.0	1	0.564861766746679	0	false	0	ENSG00000258289	110187
1090.20773775564	2.0	0.0	0.5	0.0	3	1	RBM47	protein_coding	0	false	1.37844332150543	ENSG00000163694	54502	293.0	1	0.00546055367009843	0	false	0	ENSG00000163694	0
119.340892570203	5.0	0.005698238541294341	0.2	0.0	9	2	TVP23B	protein_coding	1	false	0.0960830892822849	ENSG00000171928	51030	2.5	1	0.917721679231947	0	false	0	ENSG00000171928	33606
39.0264206105241	12.5	0.03288924398553177	0.08	0.0	24	3	RPP14	protein_coding	2	false	0.135854855686007	ENSG00000163684	11102	2.0	1	0.897328985667706	0	false	0	ENSG00000163684	193968
573.186033125631	6.5	0.046023373528133085	0.15384615384615385	0.0	12	2	GMPS	protein_coding	1	false	-1.39865218355404	ENSG00000163655	8833	3.5	1	0.00868562414213698	0	false	0	ENSG00000163655	271428
50.5153839972422	5.5	0.0027451788961362668	0.18181818181818182	0.0	10	2	GP5	protein_coding	1	false	1.26807863483265	ENSG00000178732	2814	3.5	1	0.185259976927113	0	false	0	ENSG00000178732	16190
2407.37696191735	2.0	0.0	0.5	0.0	3	1	WDFY3	protein_coding	0	false	2.00827115646371	ENSG00000163625	23001	293.0	1	1.16194685261946E-4	0	false	0	ENSG00000163625	0
181.009589516938	26.5	0.0	0.03773584905660377	0.0	52	1	AIM2	protein_coding	0	false	2.65487883155258	ENSG00000163568	9447	6.0	1	1.92476760923246E-4	0	false	0	ENSG00000163568	0
1524.28714209015	2.0	0.0	0.5	0.0	3	1	IFI16	protein_coding	0	false	1.24008104398331	ENSG00000163565	3428	293.0	1	0.0180188602755561	0	false	0	ENSG00000163565	0
13.2141462432082	2.5	0.026551085422370956	0.4	0.0	4	2	MAP10	protein_coding	1	false	-1.06155409740999	ENSG00000212916	54627	3.5	1	0.386715817655002	0	false	0	ENSG00000212916	156588
476.040396602711	2.0	0.0010641595276189753	0.5	0.0	3	2	CCT3	protein_coding	1	false	-0.306166817910447	ENSG00000163468	7203	147.0	1	0.471616002936563	0	false	0	ENSG00000163468	6276
1966.40174960336	5.5	0.0	0.18181818181818182	0.0	10	1	CXCR1	protein_coding	0	false	1.75688267354568	ENSG00000163464	3577	2.0	1	0.0398389517382939	0	false	0	ENSG00000163464	0
266.60846392877	20.5	0.0	0.04878048780487805	0.0	40	1	FSTL1	protein_coding	0	false	2.41425245416071	ENSG00000163430	11167	6.0	1	0.00216311811859516	0	false	0	ENSG00000163430	0
651.364024475953	1.0	2.897783034896158E-4	1.0	0.0	1	2	LENG8	protein_coding	1	false	0.352398308287513	ENSG00000167615	114823	16.0	1	0.67485219585869	0	false	0	ENSG00000167615	1709
959.038714827497	1.5	0.0	0.6666666666666666	0.0	2	1	PROK2	protein_coding	0	false	1.7243864887752	ENSG00000163421	60675	2.0	1	0.0258895928596094	0	false	0	ENSG00000163421	0
1059.61758103489	5.5	0.0	0.18181818181818182	0.0	10	1	EIF4E3	protein_coding	0	false	1.32797066931782	ENSG00000163412	317649	2.0	1	6.70018022426579E-4	0	false	0	ENSG00000163412	0
377.281867226113	10.0	0.0	0.1	0.0	19	1	SLC22A15	protein_coding	0	false	2.12373248771022	ENSG00000163393	55356	7.0	1	1.15439436520889E-5	0	false	0	ENSG00000163393	0
81.800604435826	2.0	0.0	0.5	0.0	3	1	COL6A3	protein_coding	0	false	3.24803215613255	ENSG00000163359	1293	6.0	1	0.0065437783879744	0	false	0	ENSG00000163359	0
1010.27398082352	12.0	1.1544435273124105	0.08333333333333333	0.0	23	2	SETD3	protein_coding	1	false	-0.967375722295596	ENSG00000183576	84193	3.5	1	0.108776300483584	0	false	0	ENSG00000183576	6808460
68.5915141421807	5.5	0.0033030318033807583	0.18181818181818182	0.0	10	2	PAQR3	protein_coding	1	false	0.062751325186408	ENSG00000163291	152559	2.5	1	0.947745826819558	0	false	0	ENSG00000163291	19480
236.741775798926	16.0	0.0	0.0625	0.0	31	1	CCNYL1	protein_coding	0	false	-1.25869556708349	ENSG00000163249	151195	4.0	1	0.0220921660085817	0	false	0	ENSG00000163249	0
205.545204945724	7.0	0.0	0.14285714285714285	0.0	13	1	TGFA	protein_coding	0	false	1.86009761337887	ENSG00000163235	7039	2.0	1	0.0279260048557047	0	false	0	ENSG00000163235	0
2025.4906469689	2.5	0.0	0.4	0.0	4	1	S100A12	protein_coding	0	false	3.54881141077651	ENSG00000163221	6283	2.0	1	7.84771570040547E-5	0	false	0	ENSG00000163221	0
33200.9244885656	2.0	0.0	0.5	0.0	3	1	S100A9	protein_coding	0	false	2.37549266824356	ENSG00000163220	6280	293.0	1	7.72859877339993E-4	0	false	0	ENSG00000163220	0
1408.53098453417	7.5	0.0	0.13333333333333333	0.0	14	1	CDC42EP3	protein_coding	0	false	1.06355871398221	ENSG00000163171	10602	2.0	1	0.0390351016677893	0	false	0	ENSG00000163171	0
3235.52140159825	2.5	0.0	0.4	0.0	4	1	RNF149	protein_coding	0	false	1.1653144173347	ENSG00000163162	284996	11.0	1	0.031460230297826	0	false	0	ENSG00000163162	0
73.9979475192131	7.5	0.0	0.13333333333333333	0.0	14	1	PACRGL	protein_coding	0	false	-1.04179100306045	ENSG00000163138	133015	2.0	1	0.0131291032474813	0	false	0	ENSG00000163138	0
1011.03813465012	13.0	0.0	0.07692307692307693	0.0	25	1	H3-3A	protein_coding	0	false	1.01989551360341	ENSG00000163041	3020	11.0	1	0.0391893410583177	0	false	0	ENSG00000163041	0
89.3327547774419	7.5	0.0	0.13333333333333333	0.0	14	1	CCDC138	protein_coding	0	false	-1.45101066296964	ENSG00000163006	165055	13.0	1	0.0209547078820171	0	false	0	ENSG00000163006	0
11.8407805845008	11.0	0.0	0.09090909090909091	0.0	21	1	CAPN13	protein_coding	0	false	3.9648542401028	ENSG00000162949	92291	2.0	1	0.029169202904177	0	false	0	ENSG00000162949	0
101.703401894715	1.0	2.8689578086859565E-4	1.0	0.0	1	2	ZNHIT3	protein_coding	1	false	-0.445572986465968	ENSG00000273611	9326	16.0	1	0.337805826979404	0	false	0	ENSG00000273611	1692
390.08080591254	1.5	0.0	0.6666666666666666	0.0	2	1	FCMR	protein_coding	0	false	-1.05971324608815	ENSG00000162894	9214	2.0	1	0.0149888651387263	0	false	0	ENSG00000162894	0
67.5124559924638	2.5	0.0	0.4	0.0	4	1	TFB2M	protein_coding	0	false	-1.29383240551931	ENSG00000162851	64216	12.0	1	0.00701502000465194	0	false	0	ENSG00000162851	0
306.074461169306	2.0	0.0023175481873002157	0.5	0.0	3	3	RBM15	protein_coding	2	false	0.0267862003520862	ENSG00000162775	64783	98.33333333333333	1	0.954684989154809	0	false	0	ENSG00000162775	13668
14.6446374585422	7.0	0.011724575980922448	0.14285714285714285	0.0	13	3	BACE1	protein_coding	2	false	-0.689331160993075	ENSG00000186318	23621	1.6666666666666667	1	0.593100308838744	0	false	0	ENSG00000186318	69147
411.05774203939	7.5	0.004434337152054086	0.13333333333333333	0.0	14	2	NCSTN	protein_coding	1	false	0.696839492295069	ENSG00000162736	23385	2.0	1	0.0560903764645506	0	false	0	ENSG00000162736	26152
495.088117982152	11.0	0.0	0.09090909090909091	0.0	21	1	ZNF281	protein_coding	0	false	1.33357615907058	ENSG00000162702	23528	4.0	1	0.0320305690723755	0	false	0	ENSG00000162702	0
7.34206383493488	33.5	0.0	0.029850746268656716	0.0	66	1	KCNT2	protein_coding	0	false	3.05594590922035	ENSG00000162687	343450	2.0	1	0.043560959828191	0	false	0	ENSG00000162687	0
2042.21137806997	4.0	0.0	0.25	0.0	7	1	GBP2	protein_coding	0	false	1.31104312437175	ENSG00000162645	2634	20.0	1	0.0177424529989686	0	false	0	ENSG00000162645	0
1472.34788190989	18.5	0.0	0.05405405405405406	0.0	36	1	ALPL	protein_coding	0	false	2.52017033309139	ENSG00000162551	249	4.0	1	0.00440963380288755	0	false	0	ENSG00000162551	0
522.196968523872	2.0	0.0	0.5	0.0	3	1	KLHL21	protein_coding	0	false	1.06924336389084	ENSG00000162413	9903	293.0	1	0.0296002375792888	0	false	0	ENSG00000162413	0
17.0780565021469	4.5	0.08954810862430422	0.2222222222222222	0.0	8	2	IGKV1D-13	IG_V_gene	1	false	-0.627472199141419	ENSG00000276566		3.0	1	0.816738287250557	0	false	0	ENSG00000276566	528120
132.443939585872	7.0	0.0	0.14285714285714285	0.0	13	1	TPCN2	protein_coding	0	false	1.17742902938562	ENSG00000162341	219931	5.0	1	0.0254223086406246	0	false	0	ENSG00000162341	0
188.76856293191	3.0	0.03176455148287138	0.3333333333333333	0.0	5	3	CWC22	protein_coding	2	false	-0.138524635507263	ENSG00000163510	57703	2.6666666666666665	1	0.768761471665586	0	false	0	ENSG00000163510	187335
1073.49552943372	18.5	0.0	0.05405405405405406	0.0	36	1	RPL29	protein_coding	0	false	-1.18401227015523	ENSG00000162244	6159	8.0	1	0.00421731278046957	0	false	0	ENSG00000162244	0
76.5281267730796	3.5	0.0017061142713355848	0.2857142857142857	0.0	6	2	CARD9	protein_coding	1	false	0.251779582318641	ENSG00000187796	64170	2.5	1	0.845631373605814	0	false	0	ENSG00000187796	10062
14.853991267677	4.0	0.0	0.25	0.0	7	1	BICDL2	protein_coding	0	false	3.69774961700102	ENSG00000162069	146439	2.0	1	0.0102043259372225	0	false	0	ENSG00000162069	0
727.485339324729	18.5	0.0	0.05405405405405406	0.0	36	1	RPL26	protein_coding	0	false	-1.19875397727514	ENSG00000161970	6154	8.0	1	0.0063377114296056	0	false	0	ENSG00000161970	0
251.812343822113	5.0	0.0	0.2	0.0	9	1	CXCL16	protein_coding	0	false	1.40131053404231	ENSG00000161921	58191	5.0	1	0.0305286320692405	0	false	0	ENSG00000161921	0
218.313669564918	2.0	0.004284615535915214	0.5	0.0	3	5	RBM10	protein_coding	4	false	0.312535699009641	ENSG00000182872	8241	59.4	1	0.394657493272745	0	false	0	ENSG00000182872	25269
131.07772351743	2.5	0.0	0.4	0.0	4	1	ADCY10P1	transcribed_unprocessed_pseudogene	0	false	1.79402103082056	ENSG00000161912	221442	5.0	1	7.85584773609406E-4	0	false	0	ENSG00000161912	0
15.2831354561846	5.5	0.0	0.18181818181818182	0.0	10	1	TAMALIN	protein_coding	0	false	-1.90629432539471	ENSG00000161835	160622	3.0	1	0.0228247159679562	0	false	0	ENSG00000161835	0
717.804378687918	2.0	0.0	0.5	0.0	3	1	LARP4	protein_coding	0	false	-1.3641865781859	ENSG00000161813	113251	13.0	1	0.0126104796523037	0	false	0	ENSG00000161813	0
79.7306739229583	5.0	0.0	0.2	0.0	9	1	ZNF385A	protein_coding	0	false	-1.41294346590919	ENSG00000161642	25946	2.0	1	0.030656841401819	0	false	0	ENSG00000161642	0
7.19818810089743	5.0	0.06923344567258749	0.2	0.0	9	2	TMEM30B	protein_coding	1	false	-0.726611472849276	ENSG00000182107	161291	5.5	1	0.734764467455819	0	false	0	ENSG00000182107	408312
10.7029328862237	5.5	0.0740977873756361	0.18181818181818182	0.0	10	3	TMEM143	protein_coding	2	false	-0.680248854887713	ENSG00000161558	55260	2.6666666666666665	1	0.664560714145197	0	false	0	ENSG00000161558	437000
996.340780868713	14.0	0.0	0.07142857142857142	0.0	27	1	ACOX1	protein_coding	0	false	1.29704457404674	ENSG00000161533	51	5.0	1	0.0169121340531862	0	false	0	ENSG00000161533	0
21.4367545264907	11.0	0.0	0.09090909090909091	0.0	21	1	FDXR	protein_coding	0	false	1.26133197931922	ENSG00000161513	2232	3.0	1	0.022555220237569	0	false	0	ENSG00000161513	0
55.8554054279399	12.0	0.19774749508784234	0.08333333333333333	0.0	23	2	ZBED6CL	protein_coding	1	false	-0.235662207656195	ENSG00000188707	113763	4.0	1	0.73046160233509	0	false	0	ENSG00000188707	1166238
135.162566256226	12.5	0.1995736579483357	0.08	0.0	24	2	ABCF3	protein_coding	1	false	0.112926105929137	ENSG00000161204	55324	2.0	1	0.852607922651424	0	false	0	ENSG00000161204	1177008
203.691114472129	28.0	0.0	0.03571428571428571	0.0	55	1	MFSD12	protein_coding	0	false	-1.42078549118369	ENSG00000161091	126321	14.0	1	0.0244891234798127	0	false	0	ENSG00000161091	0
161.883685547417	17.5	0.0	0.05714285714285714	0.0	34	1	FBXL13	protein_coding	0	false	1.82641042949811	ENSG00000161040	222235	2.0	1	0.0191987292050305	0	false	0	ENSG00000161040	0
120.467124811326	4.0	0.0016201472731675126	0.25	0.0	7	2	SH2B1	protein_coding	1	false	0.375844735104279	ENSG00000178188	25970	2.0	1	0.609209191370752	0	false	0	ENSG00000178188	9555
840.527896267732	2.0	0.0	0.5	0.0	3	1	ORAI2	protein_coding	0	false	1.26640241387009	ENSG00000160991	80228	293.0	1	0.00249118290909725	0	false	0	ENSG00000160991	0
71.198879104019	2.0	0.0011984511697276797	0.5	0.0	3	2	CPSF4	protein_coding	1	false	0.128604290976354	ENSG00000160917	10898	3.5	1	0.874287494670534	0	false	0	ENSG00000160917	7068
618.147411424827	3.0	0.0	0.3333333333333333	0.0	5	1	ZNF394	protein_coding	0	false	-1.03245827868564	ENSG00000160908	84124	2.0	1	0.0385822801257249	0	false	0	ENSG00000160908	0
1371.81492762259	7.0	0.0	0.14285714285714285	0.0	13	1	HK3	protein_coding	0	false	1.97728091423762	ENSG00000160883	3101	2.0	1	1.40436965839464E-6	0	false	0	ENSG00000160883	0
171.718205829984	6.5	0.0061184086033465755	0.15384615384615385	0.0	12	2	KIAA1143	protein_coding	1	false	-0.458240435716807	ENSG00000163807	57456	2.5	1	0.607397234963988	0	false	0	ENSG00000163807	36084
3415.84331213842	4.5	0.0	0.2222222222222222	0.0	8	1	NBEAL2	protein_coding	0	false	1.50205049494103	ENSG00000160796	23218	2.0	1	6.96642662272769E-6	0	false	0	ENSG00000160796	0
261.131205884542	2.0	0.0	0.5	0.0	3	1	LMNA	protein_coding	0	false	1.45350956496864	ENSG00000160789	4000	293.0	1	0.0106708098933202	0	false	0	ENSG00000160789	0
158.324022361167	2.0	8.403401241044681E-4	0.5	0.0	3	2	IMPDH2	protein_coding	1	false	-0.47264022627697	ENSG00000178035	3615	147.0	1	0.344350101942664	0	false	0	ENSG00000178035	4956
415.752654401083	2.5	0.0	0.4	0.0	4	1	SLC25A44	protein_coding	0	false	1.39669736290039	ENSG00000160785	9673	2.0	1	0.00236167937457439	0	false	0	ENSG00000160785	0
30.6368196276278	16.0	0.0	0.0625	0.0	31	1	PAQR6	protein_coding	0	false	2.24616858006328	ENSG00000160781	79957	2.0	1	0.0224760863736883	0	false	0	ENSG00000160781	0
1955.19419161751	21.0	0.0	0.047619047619047616	0.0	41	1	IL6R	protein_coding	0	false	1.20341804165963	ENSG00000160712	3570	14.0	1	0.0497479267535129	0	false	0	ENSG00000160712	0
3991.84078608053	2.0	0.0	0.5	0.0	3	1	ADAR	protein_coding	0	false	1.29308480646875	ENSG00000160710	103	293.0	1	0.00708575583360324	0	false	0	ENSG00000160710	0
124.158180866524	6.5	0.0	0.15384615384615385	0.0	12	1	NLRX1	protein_coding	0	false	1.26048160182357	ENSG00000160703	79671	2.0	1	0.0110448042869144	0	false	0	ENSG00000160703	0
281.710256009866	21.5	0.0	0.046511627906976744	0.0	42	1	CD3G	protein_coding	0	false	-1.53562462909846	ENSG00000160654	917	13.0	1	0.00168088669617464	0	false	0	ENSG00000160654	0
418.183311074399	5.5	0.016118388256128074	0.18181818181818182	0.0	10	2	MPZL3	protein_coding	1	false	0.88925990497713	ENSG00000160588	196264	3.0	1	0.250080628067758	0	false	0	ENSG00000160588	95060
1194.94766541459	14.5	0.0	0.06896551724137931	0.0	28	1	SHKBP1	protein_coding	0	false	1.30914237515833	ENSG00000160410	92799	3.0	1	0.00550097228667259	0	false	0	ENSG00000160410	0
78.9010801259126	4.0	0.001950111333197233	0.25	0.0	7	2	CZIB	protein_coding	1	false	-0.415170707936132	ENSG00000162384	54987	1.5	1	0.360671795595708	0	false	0	ENSG00000162384	11501
30.470106807498	4.5	0.0	0.2222222222222222	0.0	8	1	CACFD1	protein_coding	0	false	1.93505605977777	ENSG00000160325	11094	2.0	1	0.0325827963950929	0	false	0	ENSG00000160325	0
1847.02534443176	2.0	0.0	0.5	0.0	3	1	PCNT	protein_coding	0	false	-1.77276072973827	ENSG00000160299	5116	293.0	1	0.0454909287304928	0	false	0	ENSG00000160299	0
245.644214580901	6.0	0.0	0.16666666666666666	0.0	11	1	ABCG1	protein_coding	0	false	1.5486664746983	ENSG00000160179	9619	2.0	1	0.0468123701607041	0	false	0	ENSG00000160179	0
72.6260066266564	9.5	0.005002363668549237	0.10526315789473684	0.0	18	2	TMEM203	protein_coding	1	false	0.203292955755706	ENSG00000187713	94107	2.0	1	0.807211512373664	0	false	0	ENSG00000187713	29502
75.1338856322713	10.0	0.0	0.1	0.0	19	1	TMEM234	protein_coding	0	false	1.34549671255477	ENSG00000160055	56063	2.0	1	0.00216311811859516	0	false	0	ENSG00000160055	0
1741.76944605766	5.0	0.0024981297514994204	0.2	0.0	9	2	CCNDBP1	protein_coding	1	false	-0.294433647299519	ENSG00000166946	23582	2.0	1	0.767176164659631	0	false	0	ENSG00000166946	14733
140.171726877375	5.5	0.0	0.18181818181818182	0.0	10	1	ZNF230	protein_coding	0	false	1.3438414965403	ENSG00000159882	7773	2.0	1	0.020482053340962	0	false	0	ENSG00000159882	0
1761.63648497331	2.0	0.0	0.5	0.0	3	1	ZYX	protein_coding	0	false	1.27650507485525	ENSG00000159840	7791	15.0	1	0.00109721042970587	0	false	0	ENSG00000159840	0
9.14947274369118	6.0	0.004426028704499381	0.16666666666666666	0.0	11	2	CHCHD6	protein_coding	1	false	-0.517956297095977	ENSG00000159685	84303	1.5	1	0.833328498726209	0	false	0	ENSG00000159685	26103
63.9338861505532	8.0	0.0	0.1250	0.0	15	1	CCDC17	protein_coding	0	false	1.45448014285498	ENSG00000159588	149483	2.0	1	0.00729524125130146	0	false	0	ENSG00000159588	0
137.98698351936	3.5	0.0	0.2857142857142857	0.0	6	1	RGL4	protein_coding	0	false	1.53402436184889	ENSG00000159496	266747	2.0	1	0.0399265257928412	0	false	0	ENSG00000159496	0
66.6886250903816	2.0	0.0	0.5	0.0	3	1	THEM4	protein_coding	0	false	-1.69281547297712	ENSG00000159445	117145	9.0	1	0.00143473446508633	0	false	0	ENSG00000159445	0
35.7110747742668	6.0	0.004963195272934198	0.16666666666666666	0.0	11	2	C1QA	protein_coding	1	false	0.653930075571221	ENSG00000173372	712	2.5	1	0.670554495149972	0	false	0	ENSG00000173372	29271
472.6823909069	2.0	0.0	0.5	0.0	3	1	HK2	protein_coding	0	false	1.53972130863419	ENSG00000159399	3099	293.0	1	6.37227909164332E-4	0	false	0	ENSG00000159399	0
745.560936594607	13.0	0.0	0.07692307692307693	0.0	25	1	PADI4	protein_coding	0	false	2.19972304743941	ENSG00000159339	23569	2.0	1	1.56034489940072E-5	0	false	0	ENSG00000159339	0
9192.97726155847	2.0	0.0	0.5	0.0	3	1	MORC3	protein_coding	0	false	-1.99421213499629	ENSG00000159256	23515	293.0	1	0.0133017592421663	0	false	0	ENSG00000159256	0
1105.08042232006	4.5	0.0	0.2222222222222222	0.0	8	1	IFNGR2	protein_coding	0	false	1.2118194478195	ENSG00000159128	3460	25.0	1	0.0218735119080055	0	false	0	ENSG00000159128	0
199.724635546506	16.0	1.3647467822569543	0.0625	0.0	31	2	IFNAR2	protein_coding	1	false	0.920429667317616	ENSG00000159110	3455	2.5	1	0.0279260048557047	0	false	0	ENSG00000159110	8048747
260.241137375371	6.0	0.008697248988234561	0.16666666666666666	0.0	11	2	PAXBP1	protein_coding	1	false	0.0367030866820205	ENSG00000159086	94104	2.0	1	0.948953908131079	0	false	0	ENSG00000159086	51293
18.620564753101	11.5	0.008699114149930515	0.08695652173913043	0.0	22	2	CFAP298	protein_coding	1	false	-0.103925320953623	ENSG00000159079	56683	2.5	1	0.941642362026306	0	false	0	ENSG00000159079	51304
415.619561068102	4.0	0.0019251859905331176	0.25	0.0	7	2	NRAS	protein_coding	1	false	-0.0770690559866694	ENSG00000213281	4893	4.5	1	0.875368314778234	0	false	0	ENSG00000213281	11354
31.4567148074241	4.5	0.0	0.2222222222222222	0.0	8	1	MPZ	protein_coding	0	false	2.17928141765503	ENSG00000158887	4359	2.0	1	0.00868562414213698	0	false	0	ENSG00000158887	0
1176.33663338143	10.0	0.0	0.1	0.0	19	1	FCER1G	protein_coding	0	false	1.08325347872177	ENSG00000158869	2207	8.0	1	0.0498174031771445	0	false	0	ENSG00000158869	0
289.653994476198	31.0	0.23584494876909504	0.03225806451612903	0.0	61	2	CDA	protein_coding	1	false	2.07532903742453	ENSG00000158825	978	3.0	1	4.74471048821766E-4	0	false	0	ENSG00000158825	1390922
147.340614776011	11.0	0.015044224679412618	0.09090909090909091	0.0	21	2	MUS81	protein_coding	1	false	0.336592265591643	ENSG00000172732	80198	2.5	1	0.567853905830714	0	false	0	ENSG00000172732	88725
570.124076996352	2.0	0.0	0.5	0.0	3	1	EMSY	protein_coding	0	false	-1.03246441916818	ENSG00000158636	56946	293.0	1	0.0387079167101152	0	false	0	ENSG00000158636	0
727.341992880471	4.0	0.0	0.25	0.0	7	1	NCF1	protein_coding	0	false	1.49248211571928	ENSG00000158517	653361	20.0	1	0.0197486957670011	0	false	0	ENSG00000158517	0
1049.76998492666	2.0	0.0	0.5	0.0	3	1	B4GALT5	protein_coding	0	false	1.87872777265716	ENSG00000158470	9334	13.0	1	2.78726242420782E-4	0	false	0	ENSG00000158470	0
200.605460034224	5.0	0.009867383612214571	0.2	0.0	9	2	DPY19L3	protein_coding	1	false	0.876178980702386	ENSG00000178904	147991	3.0	1	0.0587925811752433	0	false	0	ENSG00000178904	58194
24.0274200603361	2.5	0.0	0.4	0.0	4	1	SHROOM4	protein_coding	0	false	2.17921518189743	ENSG00000158352	57477	2.0	1	0.0423032859147076	0	false	0	ENSG00000158352	0
462.624338513408	28.0	0.0	0.03571428571428571	0.0	55	1	ABHD3	protein_coding	0	false	1.3680527183209	ENSG00000158201	171586	14.0	1	0.0166346116745848	0	false	0	ENSG00000158201	0
83.0514480441276	23.0	0.0	0.043478260869565216	0.0	45	1	GALNT14	protein_coding	0	false	2.69295970224749	ENSG00000158089	79623	6.0	1	0.00459804377121428	0	false	0	ENSG00000158089	0
66.0613005811656	14.5	0.039372546040668664	0.06896551724137931	0.0	28	2	RAB28	protein_coding	1	false	-0.340456442114039	ENSG00000157869	9364	2.5	1	0.612051145175037	0	false	0	ENSG00000157869	232204
533.984278052661	1.5	8.182973040613727E-4	0.6666666666666666	0.0	2	2	SPPL3	protein_coding	1	false	-0.720041925639901	ENSG00000157837	121665	5.5	1	0.289466691673289	0	false	0	ENSG00000157837	4826
300.263692169346	10.0	0.0	0.1	0.0	19	1	SLC37A3	protein_coding	0	false	1.7207308967737	ENSG00000157800	84255	7.0	1	0.00162664728729023	0	false	0	ENSG00000157800	0
682.496914249904	23.0	0.0	0.043478260869565216	0.0	45	1	TMEM164	protein_coding	0	false	1.18850593602885	ENSG00000157600	84187	6.0	1	0.00380431991499178	0	false	0	ENSG00000157600	0
102.158816473394	8.0	0.06415732333697097	0.1250	0.0	15	3	CDK10	protein_coding	2	false	0.0177457468452575	ENSG00000185324	8558	1.6666666666666667	1	0.985424985914014	0	false	0	ENSG00000185324	378375
667.124158932253	8.5	0.0	0.11764705882352941	0.0	16	1	ETS2	protein_coding	0	false	1.57080696452079	ENSG00000157557	2114	3.0	1	0.0128112545325179	0	false	0	ENSG00000157557	0
1612.20518035644	17.0	0.0	0.058823529411764705	0.0	33	1	KCNJ15	protein_coding	0	false	2.36252296332499	ENSG00000157551	3772	2.0	1	0.00647675494757578	0	false	0	ENSG00000157551	0
5474.34310732131	10.0	0.0	0.1	0.0	19	1	TSC22D3	protein_coding	0	false	1.6206613079781	ENSG00000157514	1831	8.0	1	0.00211844843273977	0	false	0	ENSG00000157514	0
8.90130111543341	30.0	0.0	0.03333333333333333	0.0	59	1	CLEC18A	protein_coding	0	false	2.86106191907259	ENSG00000157322	348174	6.0	1	0.0381436881835793	0	false	0	ENSG00000157322	0
374.138662949442	19.5	0.0	0.05128205128205128	0.0	38	1	SSBP3	protein_coding	0	false	-1.55905977447558	ENSG00000157216	23648	4.0	1	0.0243422800585688	0	false	0	ENSG00000157216	0
2719.87525716145	3.5	0.0	0.2857142857142857	0.0	6	1	FCHO2	protein_coding	0	false	-1.74856951270125	ENSG00000157107	115548	16.0	1	0.0199329752981146	0	false	0	ENSG00000157107	0
112.913766762022	7.5	0.0	0.13333333333333333	0.0	14	1	FBXO32	protein_coding	0	false	-1.04164884791285	ENSG00000156804	114907	13.0	1	0.0355919541158111	0	false	0	ENSG00000156804	0
764.63319212942	2.0	0.0	0.5	0.0	3	1	ATAD2	protein_coding	0	false	-1.51967703451899	ENSG00000156802	29028	293.0	1	0.0217425298325892	0	false	0	ENSG00000156802	0
954.539016935228	7.5	0.0	0.13333333333333333	0.0	14	1	TBC1D31	protein_coding	0	false	-1.69974906392225	ENSG00000156787	93594	13.0	1	0.0220921660085817	0	false	0	ENSG00000156787	0
358.694375309582	6.5	0.0	0.15384615384615385	0.0	12	1	MAPK13	protein_coding	0	false	1.15304093370267	ENSG00000156711	5603	3.0	1	0.00742379782586068	0	false	0	ENSG00000156711	0
626.646527702281	4.0	0.001964354386148156	0.25	0.0	7	2	NPTN	protein_coding	1	false	0.564458524363138	ENSG00000156642	27020	2.0	1	0.210122152189692	0	false	0	ENSG00000156642	11585
3081.37978674432	2.5	0.0	0.4	0.0	4	1	RPL30	protein_coding	0	false	-1.32907169621315	ENSG00000156482	6156	11.0	1	9.24296836251875E-5	0	false	0	ENSG00000156482	0
672.254112599541	2.0	0.0	0.5	0.0	3	1	UQCRB	protein_coding	0	false	-1.07422207153385	ENSG00000156467	7381	293.0	1	0.00928753203580917	0	false	0	ENSG00000156467	0
130.839069901452	2.0	0.0	0.5	0.0	3	1	TDRD9	protein_coding	0	false	2.76283449044097	ENSG00000156414	122402	293.0	1	6.74250035538822E-7	0	false	0	ENSG00000156414	0
1123.11473875004	34.5	0.0	0.028985507246376812	0.0	68	1	MAP3K7CL	protein_coding	0	false	-1.14850615065389	ENSG00000156265	56911	3.0	1	0.0395539526945002	0	false	0	ENSG00000156265	0
206.606074893592	8.5	0.024791051022006873	0.11764705882352941	0.0	16	3	ZFYVE1	protein_coding	2	false	0.154784666891524	ENSG00000165861	53349	2.6666666666666665	1	0.862180005883324	0	false	0	ENSG00000165861	146208
196.828841131131	9.0	0.0	0.1111111111111111	0.0	17	1	WHAMM	protein_coding	0	false	-1.24635960340853	ENSG00000156232	123720	3.0	1	0.0126104796523037	0	false	0	ENSG00000156232	0
70.0299851201832	6.0	0.02507150351701672	0.16666666666666666	0.0	11	3	DPY19L4	protein_coding	2	false	-0.498920695332004	ENSG00000156162	286148	2.3333333333333335	1	0.470648212657852	0	false	0	ENSG00000156162	147862
24.9457256910529	10.0	0.0	0.1	0.0	19	1	KCNMA1	protein_coding	0	false	3.43983866209472	ENSG00000156113	3778	4.0	1	0.0334154932020845	0	false	0	ENSG00000156113	0
35.074218376851	1.5	0.007699048360590694	0.6666666666666666	0.0	2	4	CHCHD10	protein_coding	3	false	-0.363886883617601	ENSG00000250479	400916	6.75	1	0.689766903179451	0	false	0	ENSG00000250479	45406
248.348976766612	2.0	0.0	0.5	0.0	3	1	CARNMT1	protein_coding	0	false	-1.05208414151049	ENSG00000156017	138199	4.0	1	0.040110457433504	0	false	0	ENSG00000156017	0
162.316294587418	16.0	0.01788215297988406	0.0625	0.0	31	2	ARRDC1	protein_coding	1	false	1.03622683331551	ENSG00000197070	92714	2.0	1	0.0383734748298908	0	false	0	ENSG00000197070	105462
351.575238670958	16.5	0.009864331529439373	0.06060606060606061	0.0	32	2	VPS37A	protein_coding	1	false	-0.232187565953739	ENSG00000155975	137492	1.5	1	0.669085230084215	0	false	0	ENSG00000155975	58176
278.331540578315	12.0	0.03822665851873606	0.08333333333333333	0.0	23	2	CLIC2	protein_coding	1	false	0.561371060814607	ENSG00000155962	1193	2.5	1	0.73037444686686	0	false	0	ENSG00000155962	225446
416.19872691315	5.0	0.4460313767674103	0.2	0.0	9	6	MYO15B	protein_coding	5	false	0.637123601256558	ENSG00000266714	80022	2.0	1	0.208397490051034	0	false	0	ENSG00000266714	2630520
2289.50265910722	5.5	0.0	0.18181818181818182	0.0	10	1	SLA	protein_coding	0	false	1.33695594840344	ENSG00000155926	6503	6.0	1	0.0122499275270194	0	false	0	ENSG00000155926	0
132.124924261494	2.0	0.0	0.5	0.0	3	1	PXYLP1	protein_coding	0	false	1.22684893172215	ENSG00000155893	92370	13.0	1	0.0440573583776749	0	false	0	ENSG00000155893	0
26.6067833546688	16.5	0.04292449215038222	0.06060606060606061	0.0	32	2	RNF152	protein_coding	1	false	-0.928558354949098	ENSG00000176641	220441	4.0	1	0.566333463869749	0	false	0	ENSG00000176641	253152
1515.33381845902	13.5	0.0	0.07407407407407407	0.0	26	1	FLACC1	protein_coding	0	false	-2.60501292765049	ENSG00000155749	130540	2.0	1	0.00157197400006658	0	false	0	ENSG00000155749	0
239.03746784805	14.0	0.017612043654279055	0.07142857142857142	0.0	27	3	DAPK1	protein_coding	2	false	0.0169209830779229	ENSG00000196730	1612	2.6666666666666665	1	0.987242447712385	0	false	0	ENSG00000196730	103869
1557.63337499488	14.5	0.0	0.06896551724137931	0.0	28	1	FAM126B	protein_coding	0	false	1.63930299900198	ENSG00000155744	285172	3.0	1	0.00503648904646032	0	false	0	ENSG00000155744	0
1418.95681260576	12.0	0.038643946058167275	0.08333333333333333	0.0	23	2	CASP4	protein_coding	1	false	1.02472011221102	ENSG00000196954	837	6.0	1	0.0548757804091354	0	false	0	ENSG00000196954	227907
16.2420260338631	7.0	0.07196760315870221	0.14285714285714285	0.0	13	2	GRAMD2B	protein_coding	1	false	-0.508056599851371	ENSG00000155324	65983	2.0	1	0.760961386679599	0	false	0	ENSG00000155324	424437
733.370816014372	16.0	0.0	0.0625	0.0	31	1	SAMSN1	protein_coding	0	false	1.49934537009834	ENSG00000155307		2.0	1	0.0395780828454077	0	false	0	ENSG00000155307	0
455.579933287868	21.0	0.0	0.047619047619047616	0.0	41	1	PIP4P2	protein_coding	0	false	1.20983969745169	ENSG00000155099	55529	14.0	1	0.0146189495650863	0	false	0	ENSG00000155099	0
110.477973374211	28.0	0.0	0.03571428571428571	0.0	55	1	APOOL	protein_coding	0	false	-1.19534551836765	ENSG00000155008	139322	14.0	1	0.0323563181684178	0	false	0	ENSG00000155008	0
35.1127041593889	7.0	0.046397931908711526	0.14285714285714285	0.0	13	4	SPHK1	protein_coding	3	false	0.108453079489988	ENSG00000176170	8877	2.25	1	0.918571685103896	0	false	0	ENSG00000176170	273637
15.4065437562966	28.0	0.01462286769628114	0.03571428571428571	0.0	55	2	SRR	protein_coding	1	false	-0.513081305930238	ENSG00000167720	63826	7.5	1	0.754259131808913	0	false	0	ENSG00000167720	86240
299.899859046601	28.5	0.0	0.03508771929824561	0.0	56	1	OXNAD1	protein_coding	0	false	-1.02610312642594	ENSG00000154814	92106	2.0	1	0.0251604558346905	0	false	0	ENSG00000154814	0
29.6910152367949	6.5	0.04885367162166653	0.15384615384615385	0.0	12	3	PGM5	protein_coding	2	false	0.494499932994191	ENSG00000154330	5239	1.6666666666666667	1	0.823263347687351	0	false	0	ENSG00000154330	288120
199.794092590453	5.5	0.0035946752685663283	0.18181818181818182	0.0	10	2	TOMM70	protein_coding	1	false	-0.37954356851963	ENSG00000154174	9868	1.5	1	0.309075185044756	0	false	0	ENSG00000154174	21200
393.84824588313	2.0	0.0	0.5	0.0	3	1	UBASH3B	protein_coding	0	false	1.1206589615132	ENSG00000154127	84959	293.0	1	0.00520190696021216	0	false	0	ENSG00000154127	0
28.5738849357606	10.5	0.0	0.09523809523809523	0.0	20	1	AK5	protein_coding	0	false	-2.15268107416767	ENSG00000154027	26289	2.0	1	0.0206908976736825	0	false	0	ENSG00000154027	0
177.161975062482	5.5	0.0031487320630790906	0.18181818181818182	0.0	10	2	CEBPG	protein_coding	1	false	0.101209092440243	ENSG00000153879	1054	2.5	1	0.902003020574233	0	false	0	ENSG00000153879	18570
190.116522614211	8.5	0.005990221126788267	0.11764705882352941	0.0	16	2	CMTM7	protein_coding	1	false	0.228647810884522	ENSG00000153551	112616	3.0	1	0.76595522787248	0	false	0	ENSG00000153551	35328
2810.4312447365	2.0	0.0	0.5	0.0	3	1	ASAP1	protein_coding	0	false	-1.23567542051888	ENSG00000153317	50807	293.0	1	0.0423032859147076	0	false	0	ENSG00000153317	0
69.2184064483971	22.0	0.08548069964589058	0.045454545454545456	0.0	43	4	PPIL3	protein_coding	3	false	-0.873104429890906	ENSG00000240344	53938	2.5	1	0.0517210035909208	0	false	0	ENSG00000240344	504132
1569.41823636576	22.5	0.016114997053044523	0.044444444444444446	0.0	44	2	CYRIB	protein_coding	1	false	0.789654126970669	ENSG00000153310	51571	2.5	1	0.0752899186897835	0	false	0	ENSG00000153310	95040
2807.9659242928	2.0	0.0	0.5	0.0	3	1	SMARCA5	protein_coding	0	false	-1.56411955049279	ENSG00000153147	8467	293.0	1	0.0149479590489354	0	false	0	ENSG00000153147	0
2838.28382003278	2.0	0.0	0.5	0.0	3	1	CDYL	protein_coding	0	false	-1.98040719630965	ENSG00000153046	9425	293.0	1	0.0286304855290471	0	false	0	ENSG00000153046	0
114.252516694897	13.0	0.0	0.07692307692307693	0.0	25	1	CENPH	protein_coding	0	false	-2.32805298573005	ENSG00000153044	64946	5.0	1	5.15533038133616E-4	0	false	0	ENSG00000153044	0
64.2416585269862	2.5	0.0	0.4	0.0	4	1	PRDM8	protein_coding	0	false	1.40610169958385	ENSG00000152784	56978	4.0	1	0.0288517606525916	0	false	0	ENSG00000152784	0
65.8121449453796	7.5	0.0	0.13333333333333333	0.0	14	1	ANKRD22	protein_coding	0	false	2.98597362517982	ENSG00000152766	118932	4.0	1	0.0114772708642493	0	false	0	ENSG00000152766	0
141.10424629176	1.5	0.0	0.6666666666666666	0.0	2	1	DNAI4	protein_coding	0	false	-2.19709705534513	ENSG00000152763	79819	2.0	1	0.00576667533196827	0	false	0	ENSG00000152763	0
122.09708375791	4.0	0.016589595924587783	0.25	0.0	7	2	EXOSC6	protein_coding	1	false	-1.09636585039303	ENSG00000223496	118460	2.5	1	0.00500299187422863	0	false	0	ENSG00000223496	97839
171.486019421281	28.0	0.020721946442051463	0.03571428571428571	0.0	55	2	SLC30A6	protein_coding	1	false	-0.0910216689246517	ENSG00000152683	55676	7.5	1	0.850271843743864	0	false	0	ENSG00000152683	122210
67.156318551299	4.5	0.21279256756802586	0.2222222222222222	0.0	8	2	ETFRF1	protein_coding	1	false	-0.269630909654139	ENSG00000205707	144363	2.0	1	0.752628757367436	0	false	0	ENSG00000205707	1254968
71.4174478891228	5.0	0.23702780040463836	0.2	0.0	9	2	NADK2	protein_coding	1	false	-0.427492970899835	ENSG00000152620	133686	2.0	1	0.506023994961389	0	false	0	ENSG00000152620	1397898
56.833436809962	8.0	0.021283190552379507	0.1250	0.0	15	4	IRF2BP1	protein_coding	3	false	-0.272709835130395	ENSG00000170604	26145	2.0	1	0.672457648519145	0	false	0	ENSG00000170604	125520
5180.32339668214	8.5	0.006215397011536195	0.11764705882352941	0.0	16	2	MBNL1	protein_coding	1	false	0.141168948852478	ENSG00000152601	4154	2.5	1	0.779986166422384	0	false	0	ENSG00000152601	36656
303.612822447832	3.0	0.0	0.3333333333333333	0.0	5	1	CAMK4	protein_coding	0	false	-1.57644201403012	ENSG00000152495	814	3.0	1	0.00227785433597822	0	false	0	ENSG00000152495	0
1080.49482162291	3.5	0.0038293465219482055	0.2857142857142857	0.0	6	3	RNF123	protein_coding	2	false	-1.33983777519855	ENSG00000164068	63891	6.0	1	0.122578438625781	0	false	0	ENSG00000164068	22584
80.5947326534675	4.0	0.0	0.25	0.0	7	1	OLAH	protein_coding	0	false	4.69303750631218	ENSG00000152463	55301	3.0	1	0.0150899956204015	0	false	0	ENSG00000152463	0
42.7907172460615	13.0	0.0	0.07692307692307693	0.0	25	1	SUV39H2	protein_coding	0	false	-1.97024409064879	ENSG00000152455	79723	11.0	1	0.00494567625150799	0	false	0	ENSG00000152455	0
35.868410119824	25.5	0.0	0.0392156862745098	0.0	50	1	SPC25	protein_coding	0	false	-2.13298728992784	ENSG00000152253	57405	2.0	1	0.0407797657877782	0	false	0	ENSG00000152253	0
181.53646260583	3.5	0.0	0.2857142857142857	0.0	6	1	HAUS1	protein_coding	0	false	-1.57338471575647	ENSG00000152240	115106	5.0	1	0.00668135809514123	0	false	0	ENSG00000152240	0
570.675477143969	21.5	0.0	0.046511627906976744	0.0	42	1	PSTPIP2	protein_coding	0	false	1.37051537861445	ENSG00000152229	9050	2.0	1	0.00401897174509924	0	false	0	ENSG00000152229	0
231.683121038617	10.0	0.0	0.1	0.0	19	1	ARL11	protein_coding	0	false	1.38487792844687	ENSG00000152213	115761	2.0	1	0.0204953052224484	0	false	0	ENSG00000152213	0
199.933643641727	33.5	0.0	0.029850746268656716	0.0	66	1	OBI1	protein_coding	0	false	-1.21368600583823	ENSG00000152193	79596	4.0	1	0.00701082849767928	0	false	0	ENSG00000152193	0
59.7068389177445	17.5	0.029966705168125676	0.05714285714285714	0.0	34	3	MZT1	protein_coding	2	false	-0.381338658757366	ENSG00000204899	440145	3.3333333333333335	1	0.660553467126422	0	false	0	ENSG00000204899	176732
193.313489722635	18.0	0.0	0.05555555555555555	0.0	35	1	MZT2B	protein_coding	0	false	-1.24836013800668	ENSG00000152082	80097	3.0	1	0.0327789756380151	0	false	0	ENSG00000152082	0
844.273986923588	4.5	0.0	0.2222222222222222	0.0	8	1	GLT1D1	protein_coding	0	false	1.28285537124712	ENSG00000151948	144423	5.0	1	0.0171058824016727	0	false	0	ENSG00000151948	0
406.237817089736	1.5	7.942197621681454E-4	0.6666666666666666	0.0	2	2	TIAL1	protein_coding	1	false	-0.156124371259638	ENSG00000151923	7073	4.0	1	0.716206392995777	0	false	0	ENSG00000151923	4684
22.1513642222444	12.0	0.0029444120772950137	0.08333333333333333	0.0	23	2	CCL28	protein_coding	1	false	-1.31559681148053	ENSG00000151882	56477	3.0	1	0.0822091668165025	0	false	0	ENSG00000151882	17365
345.856470605742	22.5	0.011422250226023686	0.044444444444444446	0.0	44	2	SUGT1	protein_coding	1	false	-0.605392047136478	ENSG00000165416	10910	2.5	1	0.139626406770185	0	false	0	ENSG00000165416	67364
124.157412314445	23.0	0.0	0.043478260869565216	0.0	45	1	AMN1	protein_coding	0	false	1.46800241020295	ENSG00000151743	196394	2.0	1	0.00665304230812587	0	false	0	ENSG00000151743	0
8028.53440142373	10.5	0.0	0.09523809523809523	0.0	20	1	ACSL1	protein_coding	0	false	2.67965971116177	ENSG00000151726	2180	2.0	1	6.74464755941789E-5	0	false	0	ENSG00000151726	0
715.814445026145	16.0	0.0	0.0625	0.0	31	1	ADAM17	protein_coding	0	false	1.03144936749558	ENSG00000151694	6868	7.0	1	0.0235680234161749	0	false	0	ENSG00000151694	0
146.338125024634	15.5	0.00839831443641935	0.06451612903225806	0.0	30	2	RNF144A	protein_coding	1	false	-0.0450262714415469	ENSG00000151692	9781	3.5	1	0.955231501852142	0	false	0	ENSG00000151692	49530
2480.87525526255	8.0	0.0	0.1250	0.0	15	1	ADAM8	protein_coding	0	false	1.45920804673296	ENSG00000151651	101	2.0	1	0.0021843210118103	0	false	0	ENSG00000151651	0
177.944184804223	7.0	0.0	0.14285714285714285	0.0	13	1	TEX9	protein_coding	0	false	-2.73800444165424	ENSG00000151575	374618	11.0	1	1.22596392160424E-4	0	false	0	ENSG00000151575	0
982.494381762473	2.5	0.0010336386998669972	0.4	0.0	4	2	ZFP36L2	protein_coding	1	false	-0.358033119385309	ENSG00000152518	678	2.5	1	0.438330450788974	0	false	0	ENSG00000152518	6096
654.477851890202	3.0	0.0	0.3333333333333333	0.0	5	1	FHIP2A	protein_coding	0	false	1.01517661987414	ENSG00000151553	57700	2.0	1	0.0333641369593224	0	false	0	ENSG00000151553	0
2030.37008300142	7.5	0.0	0.13333333333333333	0.0	14	1	SCLT1	protein_coding	0	false	-1.43491405950623	ENSG00000151466	132320	13.0	1	0.007327921482248	0	false	0	ENSG00000151466	0
106.233545691062	2.0	0.0	0.5	0.0	3	1	SRFBP1	protein_coding	0	false	-1.82826178674866	ENSG00000151304	153443	293.0	1	0.00680138614389087	0	false	0	ENSG00000151304	0
864.954603770367	28.0	0.0	0.03571428571428571	0.0	55	1	CSNK1G3	protein_coding	0	false	-1.06736383875683	ENSG00000151292	1456	14.0	1	0.0216501008434179	0	false	0	ENSG00000151292	0
155.970816254137	4.0	0.005392182463003671	0.25	0.0	7	2	ANK3	protein_coding	1	false	0.0885673552166496	ENSG00000151150	288	5.0	1	0.954241132424875	0	false	0	ENSG00000151150	31801
1704.76514690989	10.0	0.3037622685249555	0.1	0.0	19	3	FCGR3A	protein_coding	2	false	0.706928560200773	ENSG00000203747	2214	4.0	1	0.483332098242055	0	false	0	ENSG00000203747	1791472
14.859857945237	15.0	0.03163755092739231	0.06666666666666667	0.0	29	5	KLRC2	protein_coding	4	false	-0.0214001991511246	ENSG00000205809	3822	1.4	1	0.994152933942001	0	false	0	ENSG00000205809	186586
45.1943461342903	15.5	0.0	0.06451612903225806	0.0	30	1	SLC7A11	protein_coding	0	false	1.60188056125729	ENSG00000151012	23657	5.0	1	0.0487098062908547	0	false	0	ENSG00000151012	0
8121.46000673915	3.5	0.002435562054607865	0.2857142857142857	0.0	6	2	PIP4K2A	protein_coding	1	false	-0.906111396264021	ENSG00000150867	5305	3.0	1	0.39002955484272	0	false	0	ENSG00000150867	14364
357.607087515204	12.0	0.0	0.08333333333333333	0.0	23	1	TMCO3	protein_coding	0	false	1.14995307318277	ENSG00000150403	55002	6.0	1	0.00168088669617464	0	false	0	ENSG00000150403	0
74.9572433090104	4.5	0.0020523561061663604	0.2222222222222222	0.0	8	2	JAGN1	protein_coding	1	false	-0.0840534492812458	ENSG00000171135	84522	13.0	1	0.920087026483297	0	false	0	ENSG00000171135	12104
206.369755456917	5.0	0.0	0.2	0.0	9	1	FCGR1A	protein_coding	0	false	2.38013232662994	ENSG00000150337	2209	2.0	1	3.7541802164433E-4	0	false	0	ENSG00000150337	0
169.482557940673	2.0	0.0	0.5	0.0	3	1	ALDOA	protein_coding	0	false	1.05210900957188	ENSG00000149925	226	293.0	1	0.0474440326658355	0	false	0	ENSG00000149925	0
54.5795079172826	5.5	0.0	0.18181818181818182	0.0	10	1	TM7SF2	protein_coding	0	false	-1.60385267641452	ENSG00000149809	7108	2.0	1	0.0321116016873979	0	false	0	ENSG00000149809	0
1784.23615830968	2.5	0.0	0.4	0.0	4	1	FERMT3	protein_coding	0	false	1.04994502210527	ENSG00000149781	83706	4.0	1	0.00807548553894371	0	false	0	ENSG00000149781	0
16.4787534438768	24.0	0.0	0.041666666666666664	0.0	47	1	TMEM25	protein_coding	0	false	-1.86741612080483	ENSG00000149582	84866	5.0	1	0.0228275881664838	0	false	0	ENSG00000149582	0
1679.646793824	29.0	0.03513201614483964	0.034482758620689655	0.0	57	2	ZDHHC18	protein_coding	1	false	1.64983623927125	ENSG00000204160	84243	3.0	1	0.0120449894217107	0	false	0	ENSG00000204160	207195
260.936711696872	29.5	0.020927792469223137	0.03389830508474576	0.0	58	2	SIDT2	protein_coding	1	false	0.0648814147766421	ENSG00000149577	51092	1.5	1	0.937662812409757	0	false	0	ENSG00000149577	123424
347.681565956269	2.5	0.0026132610961860495	0.4	0.0	4	3	MPHOSPH8	protein_coding	2	false	0.00651141478751905	ENSG00000196199	54737	4.666666666666667	1	0.99072227025377	0	false	0	ENSG00000196199	15412
183.316000340224	3.0	0.0	0.3333333333333333	0.0	5	1	ESAM	protein_coding	0	false	1.94557371333872	ENSG00000149564	90952	3.0	1	7.72859877339993E-4	0	false	0	ENSG00000149564	0
31.9246010128859	11.5	0.3352255116138532	0.08695652173913043	0.0	22	6	DNAAF5	protein_coding	5	false	-0.806040154623595	ENSG00000164818	54919	1.8333333333333333	1	0.415926777962978	0	false	0	ENSG00000164818	1977030
216.156265969936	2.0	0.0	0.5	0.0	3	1	CCDC15	protein_coding	0	false	-1.81696985341989	ENSG00000149548	80071	293.0	1	0.0339753027521281	0	false	0	ENSG00000149548	0
97.0641238819367	8.5	0.07714037478219998	0.11764705882352941	0.0	16	2	MS4A3	protein_coding	1	false	2.81270470618693	ENSG00000149516	932	3.0	1	0.0894432849202454	0	false	0	ENSG00000149516	454944
44.7039020346515	3.0	0.0	0.3333333333333333	0.0	5	1	KAT14	protein_coding	0	false	-1.0322575417496	ENSG00000149474	57325	8.0	1	0.0257148788660806	0	false	0	ENSG00000149474	0
146.479460502912	12.0	0.0	0.08333333333333333	0.0	23	1	CAPN5	protein_coding	0	false	-2.55952434048081	ENSG00000149260	726	3.0	1	0.0122792407967273	0	false	0	ENSG00000149260	0
59.5336127771283	3.5	0.0064103911888405	0.2857142857142857	0.0	6	2	RCAN1	protein_coding	1	false	0.114114787535331	ENSG00000159200	1827	2.0	1	0.91065877408396	0	false	0	ENSG00000159200	37806
1009.33591618432	3.5	0.47444321532172684	0.2857142857142857	0.0	6	8	MARCKS	protein_coding	7	false	1.24979623548526	ENSG00000277443	4082	5.3750	1	0.0599792923232412	0	false	0	ENSG00000277443	2798082
2866.57883061822	2.0	0.0	0.5	0.0	3	1	PTPRJ	protein_coding	0	false	1.12938507007517	ENSG00000149177	5795	293.0	1	0.00442609938366599	0	false	0	ENSG00000149177	0
381.13251653861	4.0	0.0017744470134691806	0.25	0.0	7	2	ARFGAP2	protein_coding	1	false	0.151807611011013	ENSG00000149182	84364	4.5	1	0.765546790010056	0	false	0	ENSG00000149182	10465
183.173103822251	4.5	0.0	0.2222222222222222	0.0	8	1	SERPING1	protein_coding	0	false	3.99873239774946	ENSG00000149131	710	2.0	1	6.57205748815613E-4	0	false	0	ENSG00000149131	0
333.15792771334	2.5	0.0	0.4	0.0	4	1	ADM	protein_coding	0	false	2.0614464968456	ENSG00000148926	133	4.0	1	0.00342318886578553	0	false	0	ENSG00000148926	0
1131.04605277115	13.0	0.0	0.07692307692307693	0.0	25	1	RGS10	protein_coding	0	false	-1.38226960137723	ENSG00000148908	6001	3.0	1	0.0238448507769401	0	false	0	ENSG00000148908	0
795.103710354589	2.0	0.0	0.5	0.0	3	1	ITPRIP	protein_coding	0	false	1.30940773450601	ENSG00000148841	85450	293.0	1	0.00342674595468088	0	false	0	ENSG00000148841	0
1960.91881784995	2.0	0.0	0.5	0.0	3	1	NOTCH1	protein_coding	0	false	1.03229051941441	ENSG00000148400	4851	293.0	1	0.0370496906127562	0	false	0	ENSG00000148400	0
9.08138093198177	9.0	0.008728278496449072	0.1111111111111111	0.0	17	2	DECR2	protein_coding	1	false	-1.33002492304458	ENSG00000242612	26063	3.0	1	0.285238922689093	0	false	0	ENSG00000242612	51476
345.572777357135	9.5	0.004697155391029454	0.10526315789473684	0.0	18	2	GPR107	protein_coding	1	false	0.648182728188983	ENSG00000148358	57720	1.5	1	0.0570588972075206	0	false	0	ENSG00000148358	27702
444.452293513894	6.5	0.0	0.15384615384615385	0.0	12	1	CIZ1	protein_coding	0	false	-1.53417626456504	ENSG00000148337	25792	10.0	1	0.0327402379900947	0	false	0	ENSG00000148337	0
68.9182380954342	2.0	0.001017360925065942	0.5	0.0	3	2	PTGES2	protein_coding	1	false	0.0834824855967389	ENSG00000148334	80142	147.0	1	0.943505659117121	0	false	0	ENSG00000148334	6000
1529.09803265546	23.0	0.011330857302921929	0.043478260869565216	0.0	45	2	BAZ1A	protein_coding	1	false	0.724265579303959	ENSG00000198604	11177	2.0	1	0.0758123194909218	0	false	0	ENSG00000198604	66825
152.492665638417	23.5	0.0	0.0425531914893617	0.0	46	1	POLE3	protein_coding	0	false	-1.01479667222461	ENSG00000148229	54107	2.0	1	0.0065437783879744	0	false	0	ENSG00000148229	0
1134.18948436144	3.5	0.0	0.2857142857142857	0.0	6	1	GSN	protein_coding	0	false	1.59649683577111	ENSG00000148180	2934	16.0	1	0.00122122252327459	0	false	0	ENSG00000148180	0
553.82958757163	21.5	0.0	0.046511627906976744	0.0	42	1	MFSD14B	protein_coding	0	false	1.20691456312112	ENSG00000148110	84641	13.0	1	0.0199725428873671	0	false	0	ENSG00000148110	0
1144.30109905599	5.0	0.0	0.2	0.0	9	1	C9orf72	protein_coding	0	false	1.44618214019284	ENSG00000147894	203228	5.0	1	0.0077443526855803	0	false	0	ENSG00000147894	0
29.7013310968639	11.5	0.0	0.08695652173913043	0.0	22	1	CDKN2B	protein_coding	0	false	1.7708245411191	ENSG00000147883	1030	4.0	1	0.00463661133429726	0	false	0	ENSG00000147883	0
46.0594253346069	3.0	0.0074402995653155895	0.3333333333333333	0.0	5	5	HAUS5	protein_coding	4	false	-0.545643893170947	ENSG00000249115	23354	1.4	1	0.367378847702187	0	false	0	ENSG00000249115	43880
396.934693984665	3.5	0.0	0.2857142857142857	0.0	6	1	HAUS6	protein_coding	0	false	-1.39642360173074	ENSG00000147874	54801	5.0	1	0.0085151643810592	0	false	0	ENSG00000147874	0
94.5942386319213	16.5	0.01548558976073706	0.06060606060606061	0.0	32	3	TMEM106A	protein_coding	2	false	0.692139215402935	ENSG00000184988	113277	2.0	1	0.130882098984026	0	false	0	ENSG00000184988	91328
68.9204789289608	3.5	0.0	0.2857142857142857	0.0	6	1	TATDN1	protein_coding	0	false	-1.49820206198302	ENSG00000147687	83940	5.0	1	0.00119333399038895	0	false	0	ENSG00000147687	0
796.903495394187	2.0	0.0	0.5	0.0	3	1	EIF3H	protein_coding	0	false	-1.15750767477955	ENSG00000147677	8667	293.0	1	5.32453102353087E-4	0	false	0	ENSG00000147677	0
1025.05101781225	1.0	2.6332691943790134E-4	1.0	0.0	1	2	MTDH	protein_coding	1	false	-0.404523655837593	ENSG00000147649	92140	16.0	1	0.330603722940945	0	false	0	ENSG00000147649	1553
2631.08512047746	2.5	0.0	0.4	0.0	4	1	RPL7	protein_coding	0	false	-1.18506961628367	ENSG00000147604	6129	11.0	1	0.00529599396211015	0	false	0	ENSG00000147604	0
2150.10640979091	2.0	0.0	0.5	0.0	3	1	DOCK5	protein_coding	0	false	1.42012416002188	ENSG00000147459	80005	293.0	1	0.00879935492137732	0	false	0	ENSG00000147459	0
2159.75254158082	2.0	0.0	0.5	0.0	3	1	ATP6V1B2	protein_coding	0	false	1.38129321122585	ENSG00000147416	526	293.0	1	0.0126007661377042	0	false	0	ENSG00000147416	0
407.048794229025	30.0	0.0	0.03333333333333333	0.0	59	1	CSGALNACT1	protein_coding	0	false	1.36539650567777	ENSG00000147408	55790	6.0	1	0.0134823061806415	0	false	0	ENSG00000147408	0
150.685794841342	16.5	0.07895263371005079	0.06060606060606061	0.0	32	3	H2BC10	protein_coding	2	false	-0.263538599980878	ENSG00000278588	8346	3.3333333333333335	1	0.776480782370719	0	false	0	ENSG00000278588	465632
95.4136946485898	17.0	0.009299696216027775	0.058823529411764705	0.0	33	2	CETN2	protein_coding	1	false	-0.217097981234688	ENSG00000147400	1069	2.0	1	0.816738287250557	0	false	0	ENSG00000147400	54846
609.214346653503	7.5	0.0	0.13333333333333333	0.0	14	1	ZNF185	protein_coding	0	false	1.15684489811529	ENSG00000147394	7739	4.0	1	0.0469273292204681	0	false	0	ENSG00000147394	0
48.899606039198	8.0	0.00148789035290894	0.1250	0.0	15	2	CD320	protein_coding	1	false	-0.577332394315416	ENSG00000167775	51293	2.5	1	0.51235364484375	0	false	0	ENSG00000167775	8775
754.044713901577	2.0	0.001192347004177284	0.5	0.0	3	2	NONO	protein_coding	1	false	-0.324116972197269	ENSG00000147140	4841	147.0	1	0.163808304008305	0	false	0	ENSG00000147140	7032
40.1256207761451	6.5	0.06161341234384358	0.15384615384615385	0.0	12	2	KRBOX4	protein_coding	1	false	-0.552147495860171	ENSG00000147121	55634	2.0	1	0.450797925808923	0	false	0	ENSG00000147121	363372
606.606861091316	27.0	0.0	0.037037037037037035	0.0	53	1	TLK2	protein_coding	0	false	-1.07513709295571	ENSG00000146872	11011	6.0	1	0.0237066373747491	0	false	0	ENSG00000146872	0
976.768799999826	2.0	0.0	0.5	0.0	3	1	TMEM140	protein_coding	0	false	1.33114347825133	ENSG00000146859	55281	293.0	1	0.0304157819625052	0	false	0	ENSG00000146859	0
78.4679334573165	9.0	0.3206979367242199	0.1111111111111111	0.0	17	3	NAXD	protein_coding	2	false	0.350210921585627	ENSG00000213995	55739	4.333333333333333	1	0.685444786748885	0	false	0	ENSG00000213995	1891352
163.093449078979	9.5	0.0	0.10526315789473684	0.0	18	1	TMEM209	protein_coding	0	false	-1.10541678826248	ENSG00000146842	84928	3.0	1	0.00214038167462747	0	false	0	ENSG00000146842	0
106.499648374841	6.0	0.0027212709143972173	0.16666666666666666	0.0	11	2	TPRA1	protein_coding	1	false	0.188377683522144	ENSG00000163870	131601	2.0	1	0.771021532796465	0	false	0	ENSG00000163870	16049
743.570451564325	6.5	0.0	0.15384615384615385	0.0	12	1	SLC12A9	protein_coding	0	false	1.05751663091019	ENSG00000146828	56996	2.0	1	0.00747166388086855	0	false	0	ENSG00000146828	0
1589.29278525652	2.5	0.0	0.4	0.0	4	1	CREB5	protein_coding	0	false	2.07054441551203	ENSG00000146592	9586	11.0	1	0.00404821844653334	0	false	0	ENSG00000146592	0
97.4362259882209	10.0	0.005038649541543256	0.1	0.0	19	2	C7orf26	protein_coding	1	false	-0.126638411761779	ENSG00000146576	79034	2.5	1	0.872319067453154	0	false	0	ENSG00000146576	29716
571.864769791086	2.0	0.0	0.5	0.0	3	1	GNA12	protein_coding	0	false	-1.9474019060551	ENSG00000146535	2768	293.0	1	0.0397619853929782	0	false	0	ENSG00000146535	0
368.112393121143	6.5	0.0	0.15384615384615385	0.0	12	1	DYNLT1	protein_coding	0	false	1.0031858040969	ENSG00000146425	6993	10.0	1	0.0442662836292417	0	false	0	ENSG00000146425	0
166.923115142	2.0	0.0	0.5	0.0	3	1	MMS22L	protein_coding	0	false	-1.15143608489996	ENSG00000146263	253714	293.0	1	0.0231992220657816	0	false	0	ENSG00000146263	0
21.1666340447605	3.0	0.0	0.3333333333333333	0.0	5	1	IRAK1BP1	protein_coding	0	false	-2.05835019415889	ENSG00000146243	134728	3.0	1	0.00455129414048648	0	false	0	ENSG00000146243	0
12.4020831778815	8.0	0.1460472475978413	0.1250	0.0	15	2	C2orf27A	lncRNA	1	false	-0.885188568506557	ENSG00000287151		2.0	1	0.508426139912695	0	false	0	ENSG00000287151	861330
100.576926643065	8.5	0.15184722223164224	0.11764705882352941	0.0	16	2	NFKBIE	protein_coding	1	false	0.309884566693206	ENSG00000146232	4794	2.0	1	0.659507599071566	0	false	0	ENSG00000146232	895536
189.586934839552	3.0	0.001228463317017125	0.3333333333333333	0.0	5	2	NFATC2IP	protein_coding	1	false	0.0387878356821547	ENSG00000176953	84901	8.0	1	0.957202812020484	0	false	0	ENSG00000176953	7245
230.273820702018	3.5	0.0	0.2857142857142857	0.0	6	1	DAAM2	protein_coding	0	false	4.12600681608186	ENSG00000146122	23500	2.0	1	0.0191646907561372	0	false	0	ENSG00000146122	0
973.403534814935	10.5	0.0	0.09523809523809523	0.0	20	1	DOK3	protein_coding	0	false	1.43311234209168	ENSG00000146094	79930	6.0	1	0.00253456314250144	0	false	0	ENSG00000146094	0
141.020090132706	3.0	0.0024221668024278302	0.3333333333333333	0.0	5	2	TRIM41	protein_coding	1	false	0.600593524880851	ENSG00000146063	90933	4.5	1	0.116365970262221	0	false	0	ENSG00000146063	14285
203.842588936143	2.5	0.0	0.4	0.0	4	1	CDKAL1	protein_coding	0	false	-1.0138735059316	ENSG00000145996	54901	11.0	1	0.0023871936592516	0	false	0	ENSG00000145996	0
120.925239160224	5.5	0.03419858749609164	0.18181818181818182	0.0	10	3	SSNA1	protein_coding	2	false	-0.386459663941932	ENSG00000176101	8636	5.333333333333333	1	0.671475283640575	0	false	0	ENSG00000176101	201690
66.7632525739426	6.0	0.0033143923337106613	0.16666666666666666	0.0	11	2	TBC1D7	protein_coding	1	false	0.411135941072914	ENSG00000145979		2.0	1	0.627315750060877	0	false	0	ENSG00000145979	19547
39.9715516774796	5.5	0.0	0.18181818181818182	0.0	10	1	MYLK4	protein_coding	0	false	-2.26426240088636	ENSG00000145949	340156	4.0	1	0.0366910241213821	0	false	0	ENSG00000145949	0
13.8374073023402	7.5	0.0038788580869680814	0.13333333333333333	0.0	14	2	N4BP3	protein_coding	1	false	0.0455706082334628	ENSG00000145911	23138	7.0	1	0.969338183033909	0	false	0	ENSG00000145911	22876
659.326901922899	2.0	0.0	0.5	0.0	3	1	FBXO38	protein_coding	0	false	1.13197194541038	ENSG00000145868	81545	293.0	1	0.00868562414213698	0	false	0	ENSG00000145868	0
2183.05835253548	2.0	0.0	0.5	0.0	3	1	ARHGAP26	protein_coding	0	false	1.36041745401462	ENSG00000145819	23092	293.0	1	0.00193885957111863	0	false	0	ENSG00000145819	0
2566.72130195809	4.0	0.0	0.25	0.0	7	1	BTF3	protein_coding	0	false	-1.46014670096381	ENSG00000145741	689	13.0	1	0.0351035048699415	0	false	0	ENSG00000145741	0
331.235756568028	28.0	0.0	0.03571428571428571	0.0	55	1	LHFPL2	protein_coding	0	false	1.12208818701489	ENSG00000145685	10184	5.0	1	0.0219756089987427	0	false	0	ENSG00000145685	0
2173.964434643	2.5	0.0	0.4	0.0	4	1	RPL37	protein_coding	0	false	-1.11518408393712	ENSG00000145592	6167	6.0	1	0.00265984465977885	0	false	0	ENSG00000145592	0
46.1433638606728	2.0	0.0	0.5	0.0	3	1	MYO10	protein_coding	0	false	2.56099245260494	ENSG00000145555	4651	293.0	1	7.81491941266996E-5	0	false	0	ENSG00000145555	0
70.3544107561062	2.5	0.0	0.4	0.0	4	1	ROPN1L	protein_coding	0	false	2.32078092047223	ENSG00000145491	83853	2.0	1	0.0015221480762781	0	false	0	ENSG00000145491	0
2366.51466418224	1.5	0.0	0.6666666666666666	0.0	2	1	RPS3A	protein_coding	0	false	-1.12391688207848	ENSG00000145425	6189	18.0	1	0.00274911100611523	0	false	0	ENSG00000145425	0
710.796058959422	21.5	0.10480038361289282	0.046511627906976744	0.0	42	3	WDR82	protein_coding	2	false	-0.231507552608628	ENSG00000164091	80335	2.6666666666666665	1	0.506415644468479	0	false	0	ENSG00000164091	618072
431.936020750552	22.0	0.0	0.045454545454545456	0.0	43	1	FIP1L1	protein_coding	0	false	-1.42758886896144	ENSG00000145216	81608	3.0	1	0.0131291032474813	0	false	0	ENSG00000145216	0
2599.87493000761	18.5	0.0	0.05405405405405406	0.0	36	1	RPL32	protein_coding	0	false	-1.29111296667733	ENSG00000144713	6161	8.0	1	4.95419762871682E-4	0	false	0	ENSG00000144713	0
339.212622479862	4.5	0.0	0.2222222222222222	0.0	8	1	CTDSPL	protein_coding	0	false	1.5729167788972	ENSG00000144677	10217	2.0	1	0.0429363897538123	0	false	0	ENSG00000144677	0
40.3901177754229	3.5	0.001452791400994165	0.2857142857142857	0.0	6	2	ZSCAN16	protein_coding	1	false	0.258309985570533	ENSG00000196812	80345	1.5	1	0.745405811355251	0	false	0	ENSG00000196812	8568
355.582041471189	4.0	0.0	0.25	0.0	7	1	SLC25A38	protein_coding	0	false	-1.58545759708268	ENSG00000144659	54977	2.0	1	0.0413642979794121	0	false	0	ENSG00000144659	0
136.67596332154	2.5	0.003305744765847601	0.4	0.0	4	3	POM121C	protein_coding	2	false	-0.172867402297429	ENSG00000272391	100101267	5.0	1	0.819847871313249	0	false	0	ENSG00000272391	19496
595.410437363344	2.0	0.0010249911320039365	0.5	0.0	3	2	UBR3	protein_coding	1	false	-0.00595794571344906	ENSG00000144357	130507	147.0	1	0.989814360253529	0	false	0	ENSG00000144357	6045
1350.50814794875	4.5	0.0	0.2222222222222222	0.0	8	1	LNPK	protein_coding	0	false	-2.07824291932213	ENSG00000144320	80856	25.0	1	6.48863318965332E-4	0	false	0	ENSG00000144320	0
319.7237691857	13.5	0.014495358460339542	0.07407407407407407	0.0	26	3	CUL5	protein_coding	2	false	-0.575768005839516	ENSG00000166266	8065	2.0	1	0.050700314369084	0	false	0	ENSG00000166266	85488
14.6511157122861	14.0	0.0	0.07142857142857142	0.0	27	1	NT5DC4	protein_coding	0	false	2.85982225043389	ENSG00000144130	284958	3.0	1	0.0291372281518451	0	false	0	ENSG00000144130	0
934.650325460937	19.0	0.0	0.05263157894736842	0.0	37	1	RALB	protein_coding	0	false	1.37114191010406	ENSG00000144118	5899	3.0	1	0.0140566742138979	0	false	0	ENSG00000144118	0
81.811744207041	3.0	0.0013844586588605695	0.3333333333333333	0.0	5	2	ETAA1	protein_coding	1	false	-0.5800278206474	ENSG00000143971	54465	3.0	1	0.224931922804974	0	false	0	ENSG00000143971	8165
2268.60164512872	2.0	0.0	0.5	0.0	3	1	RPS27A	protein_coding	0	false	-1.17748157592004	ENSG00000143947	6233	293.0	1	5.71467281113321E-4	0	false	0	ENSG00000143947	0
275.792576469619	2.0	0.0	0.5	0.0	3	1	CNIH4	protein_coding	0	false	1.22478760970353	ENSG00000143771	29097	293.0	1	0.00526831746306265	0	false	0	ENSG00000143771	0
604.869685634314	8.0	0.0	0.1250	0.0	15	1	ACP1	protein_coding	0	false	-1.66578723622394	ENSG00000143727	52	7.0	1	0.00877377549318293	0	false	0	ENSG00000143727	0
4972.8241687094	2.0	0.0	0.5	0.0	3	1	LYST	protein_coding	0	false	1.01934843288145	ENSG00000143669	1130	293.0	1	0.0409609079531157	0	false	0	ENSG00000143669	0
394.759120853549	6.0	0.0026392037997752314	0.16666666666666666	0.0	11	2	TMEM167B	protein_coding	1	false	0.234476003148488	ENSG00000215717	56900	1.5	1	0.682968579241151	0	false	0	ENSG00000215717	15565
55.9954074401081	6.5	0.0	0.15384615384615385	0.0	12	1	AQP10	protein_coding	0	false	2.64452765365798	ENSG00000143595	89872	2.0	1	0.0065437783879744	0	false	0	ENSG00000143595	0
16012.3527131074	2.0	0.0	0.5	0.0	3	1	S100A8	protein_coding	0	false	2.4705404808521	ENSG00000143546	6279	293.0	1	0.00101827255268794	0	false	0	ENSG00000143546	0
97.1832768026139	4.5	0.01704283021670466	0.2222222222222222	0.0	8	2	PELO	protein_coding	1	false	0.693885117814296	ENSG00000152684	53918	2.0	1	0.209373834861963	0	false	0	ENSG00000152684	100512
116.860437470598	5.0	0.01701841355450308	0.2	0.0	9	2	SMYD2	protein_coding	1	false	-0.304864746742116	ENSG00000143499	56950	2.0	1	0.596567925598905	0	false	0	ENSG00000143499	100368
251.836850387072	4.5	0.0	0.2222222222222222	0.0	8	1	GABPB2	protein_coding	0	false	-1.30291931113712	ENSG00000143458	126626	3.0	1	0.0156998156011272	0	false	0	ENSG00000143458	0
158.515793825715	15.0	0.0069283974598532425	0.06666666666666667	0.0	29	2	CD1D	protein_coding	1	false	0.4409894007488	ENSG00000158473	912	1.5	1	0.605247879516713	0	false	0	ENSG00000158473	40861
596.189512788881	15.5	0.0	0.06451612903225806	0.0	30	1	MINDY1	protein_coding	0	false	1.6009639947231	ENSG00000143409	55793	2.0	1	9.58259008135894E-4	0	false	0	ENSG00000143409	0
8879.28429312928	6.5	0.0	0.15384615384615385	0.0	12	1	MCL1	protein_coding	0	false	1.1702919225682	ENSG00000143384	4170	10.0	1	0.024216618182736	0	false	0	ENSG00000143384	0
127.856084891689	4.5	0.0	0.2222222222222222	0.0	8	1	ADAMTSL4	protein_coding	0	false	1.37882000362743	ENSG00000143382	54507	9.0	1	0.026212344838195	0	false	0	ENSG00000143382	0
269.611477033585	2.5	0.0015375714780829937	0.4	0.0	4	2	SETDB1	protein_coding	1	false	0.596452249302228	ENSG00000143379	9869	3.0	1	0.101538947891199	0	false	0	ENSG00000143379	9068
846.459931046894	9.0	0.0	0.1111111111111111	0.0	17	1	SNX27	protein_coding	0	false	1.03103578314781	ENSG00000143376	81609	5.0	1	0.0236116712887582	0	false	0	ENSG00000143376	0
40.3025517571872	7.0	0.0	0.14285714285714285	0.0	13	1	TUFT1	protein_coding	0	false	1.79878436467894	ENSG00000143367	7286	11.0	1	0.0331386113397734	0	false	0	ENSG00000143367	0
3637.04014823143	21.5	0.0	0.046511627906976744	0.0	42	1	FCGR2A	protein_coding	0	false	1.51048215613351	ENSG00000143226	2212	13.0	1	0.0261609154954805	0	false	0	ENSG00000143226	0
2108.09999887955	11.5	0.037732221109154016	0.08695652173913043	0.0	22	4	CCL5	protein_coding	3	false	-0.743209095498622	ENSG00000271503	6352	2.0	1	0.141806113306614	0	false	0	ENSG00000271503	222530
8.18082370934992	12.0	0.0038881838954478525	0.08333333333333333	0.0	23	2	XCL2	protein_coding	1	false	-1.09937468852538	ENSG00000143185	6846	3.0	1	0.58293315820987	0	false	0	ENSG00000143185	22931
1625.2089397054	12.5	0.0	0.08	0.0	24	1	DCAF6	protein_coding	0	false	-1.62061622013004	ENSG00000143164	55827	2.0	1	0.0246953092824883	0	false	0	ENSG00000143164	0
2657.36483453082	2.0	0.0	0.5	0.0	3	1	RPS8	protein_coding	0	false	-1.09460788398751	ENSG00000142937	6202	293.0	1	0.00444774124251216	0	false	0	ENSG00000142937	0
265.375231179529	2.5	9.475021415447473E-4	0.4	0.0	4	2	LIMD1	protein_coding	1	false	0.179439246599257	ENSG00000144791	8994	4.0	1	0.780179859980546	0	false	0	ENSG00000144791	5588
55.6700860190038	3.0	0.0	0.3333333333333333	0.0	5	1	MAP3K6	protein_coding	0	false	1.15445868250873	ENSG00000142733	9064	2.0	1	0.049315916710639	0	false	0	ENSG00000142733	0
607.808533910216	2.0	0.0	0.5	0.0	3	1	KIAA0319L	protein_coding	0	false	1.01636669926898	ENSG00000142687	79932	293.0	1	0.0175634715513187	0	false	0	ENSG00000142687	0
2457.47417215787	2.0	0.0	0.5	0.0	3	1	RPL11	protein_coding	0	false	-1.08268471333114	ENSG00000142676	6135	25.0	1	0.00184056459727755	0	false	0	ENSG00000142676	0
1718.59015489027	13.0	0.0	0.07692307692307693	0.0	25	1	PGD	protein_coding	0	false	1.56790044086639	ENSG00000142657	5226	10.0	1	7.72859877339993E-4	0	false	0	ENSG00000142657	0
5097.71537169519	2.0	0.0	0.5	0.0	3	1	RPL13A	protein_coding	0	false	-1.13673316740144	ENSG00000142541	23521	25.0	1	0.00105690156138731	0	false	0	ENSG00000142541	0
5717.3145698367	1.5	0.0	0.6666666666666666	0.0	2	1	RPS11	protein_coding	0	false	-1.31502724257886	ENSG00000142534	6205	7.0	1	0.00342674595468088	0	false	0	ENSG00000142534	0
1140.76567162644	22.5	0.08488723910626877	0.044444444444444446	0.0	44	3	CARM1	protein_coding	2	false	-2.28938555860455	ENSG00000142453	10498	2.6666666666666665	1	0.0124821519764751	0	false	0	ENSG00000142453	500632
332.509449547966	2.5	9.420762166110623E-4	0.4	0.0	4	2	IRAK1	protein_coding	1	false	0.135413059877286	ENSG00000184216	3654	6.5	1	0.861802578783358	0	false	0	ENSG00000184216	5556
734.708481130065	3.0	0.0	0.3333333333333333	0.0	5	1	NLRP12	protein_coding	0	false	1.71764704264432	ENSG00000142405	91662	2.0	1	5.6557304787602E-4	0	false	0	ENSG00000142405	0
776.198328095229	2.0	0.0011877688800144873	0.5	0.0	3	2	APP	protein_coding	1	false	0.784840822830941	ENSG00000142192	351	147.0	1	0.145731991334578	0	false	0	ENSG00000142192	7005
148.754038526279	5.0	0.002826228649833187	0.2	0.0	9	2	TMEM50B	protein_coding	1	false	-0.379000360284533	ENSG00000142188	757	4.0	1	0.461209034928866	0	false	0	ENSG00000142188	16668
142.454705242014	4.0	0.0	0.25	0.0	7	1	TRPM2	protein_coding	0	false	1.5332976762892	ENSG00000142185	7226	4.0	1	0.00106636744905193	0	false	0	ENSG00000142185	0
936.779559857164	2.5	0.0	0.4	0.0	4	1	PGGHG	protein_coding	0	false	1.11642556179122	ENSG00000142102	80162	4.0	1	0.0166488293450695	0	false	0	ENSG00000142102	0
1929.59807592442	2.0	0.0	0.5	0.0	3	1	IFITM3	protein_coding	0	false	2.89670863986989	ENSG00000142089	10410	293.0	1	9.11745364056333E-5	0	false	0	ENSG00000142089	0
147.212919750591	4.0	0.0	0.25	0.0	7	1	TMEM91	protein_coding	0	false	1.55143458203618	ENSG00000142046	641649	4.0	1	0.0168091227065484	0	false	0	ENSG00000142046	0
37.703881612924	2.5	0.0	0.4	0.0	4	1	TPGS1	protein_coding	0	false	-1.3376801751197	ENSG00000141933	91978	7.0	1	0.0125102142859324	0	false	0	ENSG00000141933	0
130.280799823686	25.5	0.9259001779025138	0.0392156862745098	0.0	50	4	L3MBTL3	protein_coding	3	false	-0.202207856087214	ENSG00000198945	84456	2.75	1	0.712655055401345	0	false	0	ENSG00000198945	5460600
140.808852914671	5.0	0.004651374149401487	0.2	0.0	9	2	HSD17B12	protein_coding	1	false	0.334341308917197	ENSG00000149084	51144	6.5	1	0.576457525761959	0	false	0	ENSG00000149084	27432
73.9264559776639	5.5	0.002829958973225095	0.18181818181818182	0.0	10	2	RNF157	protein_coding	1	false	-0.41065221918371	ENSG00000141576	114804	2.0	1	0.740376548481309	0	false	0	ENSG00000141576	16690
189.911543877445	32.5	0.038600029978235265	0.03076923076923077	0.0	64	3	RYK	protein_coding	2	false	-0.453107687233114	ENSG00000163785	6259	2.3333333333333335	1	0.225460557120913	0	false	0	ENSG00000163785	227648
559.076021706146	33.0	0.0	0.030303030303030304	0.0	65	1	SECTM1	protein_coding	0	false	1.38712925915633	ENSG00000141574	6398	3.0	1	0.0123207535003346	0	false	0	ENSG00000141574	0
1342.51862976199	2.0	0.0	0.5	0.0	3	1	SLC16A3	protein_coding	0	false	1.68626300864813	ENSG00000141526	9123	293.0	1	3.62302386399123E-5	0	false	0	ENSG00000141526	0
55.99881525062	7.0	0.011993498385448213	0.14285714285714285	0.0	13	4	C18orf21	protein_coding	3	false	0.0659516477815809	ENSG00000141428	83608	2.0	1	0.938663869221701	0	false	0	ENSG00000141428	70733
207.655605844917	15.5	0.0	0.06451612903225806	0.0	30	1	IMPA2	protein_coding	0	false	1.41262437474844	ENSG00000141401	3613	3.0	1	0.0201188412417387	0	false	0	ENSG00000141401	0
234.089792756946	2.0	0.0	0.5	0.0	3	1	TAF4B	protein_coding	0	false	-1.60770791294284	ENSG00000141384	6875	293.0	1	0.0155672087400806	0	false	0	ENSG00000141384	0
3870.36552738977	2.0	0.0	0.5	0.0	3	1	SSH2	protein_coding	0	false	1.60259509806405	ENSG00000141298	85464	293.0	1	0.00209564079856263	0	false	0	ENSG00000141298	0
299.43415596501	10.0	0.0	0.1	0.0	19	1	PRPSAP2	protein_coding	0	false	-1.31937904666297	ENSG00000141127	5636	4.0	1	0.0307239829488223	0	false	0	ENSG00000141127	0
1367.0319291911	9.5	0.010694498044293182	0.10526315789473684	0.0	18	2	RANBP10	protein_coding	1	false	-1.7436841829378	ENSG00000141084	57610	3.5	1	0.0617757018770016	0	false	0	ENSG00000141084	63072
127.290631925735	13.0	0.0	0.07692307692307693	0.0	25	1	UTP4	protein_coding	0	false	-1.51796121686762	ENSG00000141076	84916	10.0	1	0.0102043259372225	0	false	0	ENSG00000141076	0
193.14932959614	2.0	0.0	0.5	0.0	3	1	GALNS	protein_coding	0	false	1.11604993344476	ENSG00000141012	2588	13.0	1	0.00143473446508633	0	false	0	ENSG00000141012	0
580.647336134821	4.5	0.0	0.2222222222222222	0.0	8	1	DEF8	protein_coding	0	false	1.2037128426762	ENSG00000140995	54849	9.0	1	0.0455062614274133	0	false	0	ENSG00000140995	0
2663.36519576592	2.0	0.0	0.5	0.0	3	1	RPS2	protein_coding	0	false	-1.13767674871598	ENSG00000140988	6187	293.0	1	0.00721954712082297	0	false	0	ENSG00000140988	0
118.448574590071	2.0	0.0	0.5	0.0	3	1	KIFC3	protein_coding	0	false	1.92225810371579	ENSG00000140859	3801	15.0	1	4.95354088614978E-4	0	false	0	ENSG00000140859	0
91.0358673881802	5.0	0.04028291450844851	0.2	0.0	9	4	POLR2M	protein_coding	3	false	-0.558015837684401	ENSG00000255529	81488	2.25	1	0.368850402233173	0	false	0	ENSG00000255529	237573
135.331481713725	5.5	0.0	0.18181818181818182	0.0	10	1	CPNE2	protein_coding	0	false	1.14258674774834	ENSG00000140848	221184	4.0	1	0.019994123548802	0	false	0	ENSG00000140848	0
74.5325173958032	2.0	0.0	0.5	0.0	3	1	ZFHX3	protein_coding	0	false	-1.43892779673458	ENSG00000140836	463	293.0	1	0.0485827623415609	0	false	0	ENSG00000140836	0
40.222593018045	22.5	0.0	0.044444444444444446	0.0	44	1	TGFB1I1	protein_coding	0	false	2.00548714418477	ENSG00000140682	7041	20.0	1	0.0332802241772438	0	false	0	ENSG00000140682	0
2863.3329980451	2.5	0.0	0.4	0.0	4	1	ITGAX	protein_coding	0	false	1.19801517723862	ENSG00000140678	3687	3.0	1	0.0105219035302604	0	false	0	ENSG00000140678	0
2066.34376755202	2.0	0.0	0.5	0.0	3	1	MCTP2	protein_coding	0	false	1.99494355040755	ENSG00000140563	55784	7.0	1	7.81491941266996E-5	0	false	0	ENSG00000140563	0
314.095081193784	2.0	0.0	0.5	0.0	3	1	PCSK6	protein_coding	0	false	1.71362291480522	ENSG00000140479	5046	293.0	1	0.0378190204274224	0	false	0	ENSG00000140479	0
158.775159125317	12.5	0.005518165657557669	0.08	0.0	24	2	PLRG1	protein_coding	1	false	-0.275825292286162	ENSG00000171566	5356	2.5	1	0.621816160706039	0	false	0	ENSG00000171566	32544
519.612510948867	13.0	0.0	0.07692307692307693	0.0	25	1	LINS1	protein_coding	0	false	-1.8483177009455	ENSG00000140471	55180	2.0	1	0.00109721042970587	0	false	0	ENSG00000140471	0
61.713876660768	11.0	0.007053871973944709	0.09090909090909091	0.0	21	2	LZTFL1	protein_coding	1	false	-0.439558816902617	ENSG00000163818	54585	2.5	1	0.450605879624507	0	false	0	ENSG00000163818	41601
88.7350326917142	4.5	1.4921293567633817E-5	0.2222222222222222	0.0	8	2	SH2B2	protein_coding	1	false	0.628989449027412	ENSG00000160999	10603	2.0	1	0.418145793585992	0	false	0	ENSG00000160999	88
682.718803593142	4.0	0.0	0.25	0.0	7	1	BCL2A1	protein_coding	0	false	1.49582751251768	ENSG00000140379	597	2.0	1	0.048468119603705	0	false	0	ENSG00000140379	0
369.45841494895	4.0	0.0	0.25	0.0	7	1	UBE2Q2	protein_coding	0	false	-1.14109603784694	ENSG00000140367	92912	13.0	1	0.00143473446508633	0	false	0	ENSG00000140367	0
1388.16714662489	2.0	0.0	0.5	0.0	3	1	TLE3	protein_coding	0	false	1.21310239117599	ENSG00000140332	7090	293.0	1	0.00992447100153527	0	false	0	ENSG00000140332	0
184.753666727652	3.5	0.003314561893864839	0.2857142857142857	0.0	6	2	SLC35E3	protein_coding	1	false	0.999997470607159	ENSG00000175782	55508	2.5	1	0.101608216711238	0	false	0	ENSG00000175782	19548
1391.64150183717	4.0	0.0022658323402760306	0.25	0.0	7	2	BNIP2	protein_coding	1	false	0.397892683045325	ENSG00000140299	663	1.5	1	0.369195721554569	0	false	0	ENSG00000140299	13363
181.809050150955	10.5	0.12368395886335012	0.09523809523809523	0.0	20	3	CWC25	protein_coding	2	false	0.630672308428683	ENSG00000273559	54883	3.0	1	0.140363927634462	0	false	0	ENSG00000273559	729440
6337.64347524501	11.0	0.01416471615969311	0.09090909090909091	0.0	21	2	SERF2	protein_coding	1	false	-1.27451092235421	ENSG00000140264	10169	2.5	1	0.0807729573650875	0	false	0	ENSG00000140264	83538
2238.6703180495	5.0	0.0	0.2	0.0	9	1	SLC12A6	protein_coding	0	false	1.22380854774272	ENSG00000140199	9990	8.0	1	0.00476445942094896	0	false	0	ENSG00000140199	0
427.769628259155	2.0	0.0	0.5	0.0	3	1	STON2	protein_coding	0	false	1.22859080437938	ENSG00000140022	85439	293.0	1	0.0498174031771445	0	false	0	ENSG00000140022	0
424.466167034525	16.0	0.06825389666190317	0.0625	0.0	31	4	IRAK4	protein_coding	3	false	0.48691131094937	ENSG00000198001	51135	2.0	1	0.137380887018532	0	false	0	ENSG00000198001	402535
642.96163770777	16.5	0.0	0.06060606060606061	0.0	32	1	PELI2	protein_coding	0	false	1.26437599976426	ENSG00000139946	57161	4.0	1	0.00991041972179548	0	false	0	ENSG00000139946	0
63.1652884138935	6.0	0.0	0.16666666666666666	0.0	11	1	REM2	protein_coding	0	false	1.72313732049768	ENSG00000139890	161253	2.0	1	0.0166488293450695	0	false	0	ENSG00000139890	0
320.130938831891	1.5	0.009378711247874564	0.6666666666666666	0.0	2	13	MBNL2	protein_coding	12	false	0.0645333686847449	ENSG00000139793	10150	1.3076923076923077	1	0.944181474608183	0	false	0	ENSG00000139793	55312
249.47908999239	6.0	0.003073786474932566	0.16666666666666666	0.0	11	2	LPAR6	protein_coding	1	false	-0.530934475110465	ENSG00000139679	10161	1.5	1	0.482464481183059	0	false	0	ENSG00000139679	18128
60.8255658251218	3.5	0.07157337580023915	0.2857142857142857	0.0	6	2	RHNO1	protein_coding	1	false	-0.480343332520282	ENSG00000171792	83695	2.5	1	0.39424924519066	0	false	0	ENSG00000171792	422112
190.819632632317	3.5	0.0030785341592495406	0.2857142857142857	0.0	6	2	CSAD	protein_coding	1	false	1.52785848320171	ENSG00000139631	51380	2.0	1	0.0146125862900365	0	false	0	ENSG00000139631	18156
311.449474964335	10.0	0.1610757031829154	0.1	0.0	19	3	DYM	protein_coding	2	false	-0.258174840083732	ENSG00000141627	54808	3.0	1	0.431170448706211	0	false	0	ENSG00000141627	949962
25.4256462762886	10.5	0.0	0.09523809523809523	0.0	20	1	GPR84	protein_coding	0	false	2.03284966578518	ENSG00000139572	53831	3.0	1	0.0489475369669169	0	false	0	ENSG00000139572	0
140.453343065024	10.0	0.061633250881882366	0.1	0.0	19	3	NUP35	protein_coding	2	false	-1.60793373274907	ENSG00000163002	129401	2.0	1	0.0133017592421663	0	false	0	ENSG00000163002	363489
678.688256549884	10.5	0.007355519488226761	0.09523809523809523	0.0	20	2	NUP58	protein_coding	1	false	0.425883644220472	ENSG00000139496	9818	2.0	1	0.348482303948123	0	false	0	ENSG00000139496	43380
664.385384278387	11.0	0.0	0.09090909090909091	0.0	21	1	SLC15A4	protein_coding	0	false	1.17294357477868	ENSG00000139370	121260	2.0	1	0.042975392481624	0	false	0	ENSG00000139370	0
1278.31372472399	7.0	0.004957430227692158	0.14285714285714285	0.0	13	2	GLIPR1	protein_coding	1	false	0.294128257589818	ENSG00000139278	11010	1.5	1	0.72474466727246	0	false	0	ENSG00000139278	29237
12.1694441452455	6.5	0.0027061800606754055	0.15384615384615385	0.0	12	2	C1R	protein_coding	1	false	0.63981599258483	ENSG00000159403	715	1.5	1	0.603839094065037	0	false	0	ENSG00000159403	15960
400.417818867615	7.0	0.0	0.14285714285714285	0.0	13	1	C1RL	protein_coding	0	false	1.47925132303594	ENSG00000139178	51279	2.0	1	0.00280128410172543	0	false	0	ENSG00000139178	0
813.232368625645	2.0	0.0	0.5	0.0	3	1	FGD4	protein_coding	0	false	1.13897841220407	ENSG00000139132	121512	293.0	1	0.0166488293450695	0	false	0	ENSG00000139132	0
7.69735073741515	4.0	0.08192604057371018	0.25	0.0	7	3	HNRNPA1L2	protein_coding	2	false	-0.152920292842775	ENSG00000139675	144983	1.6666666666666667	1	0.946525871595514	0	false	0	ENSG00000139675	483168
4649.13945371019	4.5	0.0	0.2222222222222222	0.0	8	1	GUCD1	protein_coding	0	false	-1.82367983884458	ENSG00000138867	83606	3.0	1	0.0361734471383333	0	false	0	ENSG00000138867	0
768.658128566129	2.0	0.0	0.5	0.0	3	1	SEC24B	protein_coding	0	false	-1.07667749687044	ENSG00000138802	10427	293.0	1	0.0244891234798127	0	false	0	ENSG00000138802	0
186.826456510888	15.5	0.01631338243343238	0.06451612903225806	0.0	30	2	RNF103	protein_coding	1	false	0.15822607322101	ENSG00000239305	7844	4.0	1	0.801585486970582	0	false	0	ENSG00000239305	96210
64.9965660004346	16.0	0.009897734879812372	0.0625	0.0	31	2	HADH	protein_coding	1	false	-0.632310963107534	ENSG00000138796	3033	1.5	1	0.291738808288356	0	false	0	ENSG00000138796	58373
153.044997133954	13.5	0.6223040783286524	0.07407407407407407	0.0	26	3	KMT5A	protein_coding	2	false	-0.812105648262547	ENSG00000183955	387893	3.3333333333333335	1	0.128459018368635	0	false	0	ENSG00000183955	3670108
335.859105451791	14.0	0.0	0.07142857142857142	0.0	27	1	LEF1	protein_coding	0	false	-1.14639231250025	ENSG00000138795	51176	3.0	1	0.0397204595983357	0	false	0	ENSG00000138795	0
75.4155798030144	10.0	0.013112086722558217	0.1	0.0	19	3	INTS12	protein_coding	2	false	-0.0745301171247401	ENSG00000138785	57117	2.0	1	0.92787517628905	0	false	0	ENSG00000138785	77330
301.137693682776	2.0	0.0	0.5	0.0	3	1	CENPE	protein_coding	0	false	-1.38838737393254	ENSG00000138778	1062	293.0	1	0.0485827623415609	0	false	0	ENSG00000138778	0
550.734354763401	13.0	0.0	0.07692307692307693	0.0	25	1	ANXA3	protein_coding	0	false	3.00969406597499	ENSG00000138772	306	10.0	1	0.0015221480762781	0	false	0	ENSG00000138772	0
510.075769687323	21.5	0.0	0.046511627906976744	0.0	42	1	CCNG2	protein_coding	0	false	1.17878185682275	ENSG00000138764	901	2.0	1	0.030907127155183	0	false	0	ENSG00000138764	0
1701.07029809565	2.0	0.0	0.5	0.0	3	1	BMP2K	protein_coding	0	false	-1.18824732037749	ENSG00000138756	55589	293.0	1	0.0412221896113334	0	false	0	ENSG00000138756	0
383.426353678937	7.0	0.0	0.14285714285714285	0.0	13	1	NUP54	protein_coding	0	false	-1.20488232709551	ENSG00000138750	53371	11.0	1	0.0308311758756692	0	false	0	ENSG00000138750	0
551.936481532654	1.5	4.456040851788826E-4	0.6666666666666666	0.0	2	2	H1-5	protein_coding	1	false	-0.0256224247497129	ENSG00000184357	3009	9.5	1	0.987581338761939	0	false	0	ENSG00000184357	2628
692.760337408889	2.0	0.0	0.5	0.0	3	1	MMRN1	protein_coding	0	false	2.51219951704349	ENSG00000138722	22915	2.0	1	0.00542132369651912	0	false	0	ENSG00000138722	0
611.587166789847	2.5	0.0	0.4	0.0	4	1	LARP1B	protein_coding	0	false	-2.3684563820328	ENSG00000138709	55132	5.0	1	1.16194685261946E-4	0	false	0	ENSG00000138709	0
428.527628091374	2.0	0.0	0.5	0.0	3	1	FAM13A	protein_coding	0	false	-1.33998657540703	ENSG00000138640	10144	293.0	1	0.0185685139278219	0	false	0	ENSG00000138640	0
180.707985169676	16.5	0.0	0.06060606060606061	0.0	32	1	ARHGAP24	protein_coding	0	false	1.23280539625123	ENSG00000138639	83478	2.0	1	0.0102437986804018	0	false	0	ENSG00000138639	0
494.193823266075	2.5	0.0	0.4	0.0	4	1	UBL7	protein_coding	0	false	-1.366122351535	ENSG00000138629	84993	4.0	1	0.0473215253866565	0	false	0	ENSG00000138629	0
1440.70596105455	6.5	0.0	0.15384615384615385	0.0	12	1	PARP9	protein_coding	0	false	1.47242073506346	ENSG00000138496	83666	2.0	1	0.0231992220657816	0	false	0	ENSG00000138496	0
892.407025721073	2.0	0.0	0.5	0.0	3	1	ITPRID2	protein_coding	0	false	1.10011842984588	ENSG00000138434	6744	293.0	1	0.00174923357908808	0	false	0	ENSG00000138434	0
169.039781483027	13.5	0.0	0.07407407407407407	0.0	26	1	OLA1	protein_coding	0	false	-1.13785555114951	ENSG00000138430	29789	4.0	1	0.0207755247172381	0	false	0	ENSG00000138430	0
189.565531415744	2.5	0.0	0.4	0.0	4	1	FASTKD1	protein_coding	0	false	-1.05442596081018	ENSG00000138399	79675	12.0	1	0.0392329735462464	0	false	0	ENSG00000138399	0
10.6643463335984	1.0	0.2487571240698778	1.0	0.0	1	3	AC007952.4	lncRNA	2	false	-0.531633389305505	ENSG00000262202		21.0	1	0.738752713532585	0	false	0	ENSG00000262202	1467073
399.04826229081	1.5	0.004771083618250913	0.6666666666666666	0.0	2	7	PPIG	protein_coding	6	false	-0.161208915376634	ENSG00000138398	9360	1.2857142857142858	1	0.684560802337157	0	false	0	ENSG00000138398	28138
240.109478744915	3.0	0.2705595078143493	0.3333333333333333	0.0	5	4	ZNF121	protein_coding	3	false	-0.442254617114747	ENSG00000197961	7675	3.5	1	0.252182081451512	0	false	0	ENSG00000197961	1595655
496.129891906077	10.0	0.0	0.1	0.0	19	1	DNA2	protein_coding	0	false	-1.79254481954113	ENSG00000138346	1763	2.0	1	0.0168049559416282	0	false	0	ENSG00000138346	0
2381.56436806359	1.5	0.0	0.6666666666666666	0.0	2	1	RPS24	protein_coding	0	false	-1.07485575443503	ENSG00000138326	6229	18.0	1	4.90586387636173E-4	0	false	0	ENSG00000138326	0
640.121475396427	3.0	0.0036998025641564757	0.3333333333333333	0.0	5	2	ANXA7	protein_coding	1	false	0.112500613563213	ENSG00000138279	310	2.5	1	0.89731828697293	0	false	0	ENSG00000138279	21820
127.607941130093	7.5	0.003081247121716383	0.13333333333333333	0.0	14	2	ANKRD40	protein_coding	1	false	-0.448030047701864	ENSG00000154945	91369	2.5	1	0.442277046560142	0	false	0	ENSG00000154945	18172
1128.74644058505	8.0	0.0	0.1250	0.0	15	1	ENTPD1	protein_coding	0	false	1.74798045610315	ENSG00000138185	953	2.0	1	2.93059392722273E-4	0	false	0	ENSG00000138185	0
758.530755482484	2.0	0.0	0.5	0.0	3	1	KIF20B	protein_coding	0	false	-1.78970593812545	ENSG00000138182	9585	293.0	1	0.00661655055997712	0	false	0	ENSG00000138182	0
563.410599594957	32.5	0.03841554853048997	0.03076923076923077	0.0	64	2	DNAJB14	protein_coding	1	false	0.296072316829054	ENSG00000164031	79982	3.5	1	0.551332701485031	0	false	0	ENSG00000164031	226560
8.24760091499349	33.0	0.024743065498374597	0.030303030303030304	0.0	65	2	KHK	protein_coding	1	false	0.572027953396079	ENSG00000138030	3795	1.5	1	0.740376548481309	0	false	0	ENSG00000138030	145925
114.755772374612	6.0	0.04770524069742126	0.16666666666666666	0.0	11	2	KYAT3	protein_coding	1	false	-0.316596154209394	ENSG00000137944	56267	3.5	1	0.46042581096378	0	false	0	ENSG00000137944	281347
1939.74645990507	2.0	0.0	0.5	0.0	3	1	RPLP1	protein_coding	0	false	-1.04070224266922	ENSG00000137818	6176	293.0	1	0.0102403783014738	0	false	0	ENSG00000137818	0
501.220607090589	2.0	0.0	0.5	0.0	3	1	KNL1	protein_coding	0	false	-1.63991173939076	ENSG00000137812	57082	293.0	1	0.0264584341905222	0	false	0	ENSG00000137812	0
156.001868013339	2.5	0.0	0.4	0.0	4	1	KIF23	protein_coding	0	false	-1.50470632456234	ENSG00000137807	9493	12.0	1	0.0468809109061872	0	false	0	ENSG00000137807	0
1447.33720813339	2.0	0.0	0.5	0.0	3	1	THBS1	protein_coding	0	false	1.36496447315522	ENSG00000137801	7057	293.0	1	0.035547681760468	0	false	0	ENSG00000137801	0
1531.74461991885	1.5	0.0	0.6666666666666666	0.0	2	1	SLTM	protein_coding	0	false	-1.08718195902839	ENSG00000137776	79811	7.0	1	0.0258103528245669	0	false	0	ENSG00000137776	0
97.6462906012435	1.5	0.001593865449269976	0.6666666666666666	0.0	2	3	BUD13	protein_coding	2	false	-0.0860839409836613	ENSG00000137656	84811	4.0	1	0.906623436236373	0	false	0	ENSG00000137656	9400
23.0033369424773	3.5	0.0013083261496348014	0.2857142857142857	0.0	6	2	ZNF517	protein_coding	1	false	0.0120907386059592	ENSG00000197363	340385	2.0	1	0.992813914859287	0	false	0	ENSG00000197363	7716
14564.1206376702	4.0	0.0	0.25	0.0	7	1	SORL1	protein_coding	0	false	1.40338062645113	ENSG00000137642	6653	2.0	1	0.0179799264273584	0	false	0	ENSG00000137642	0
685.434635983118	23.0	0.0	0.043478260869565216	0.0	45	1	NEK1	protein_coding	0	false	-1.77738813203341	ENSG00000137601	4750	2.0	1	0.0186285703868583	0	false	0	ENSG00000137601	0
3403.2037347814	2.0	0.0	0.5	0.0	3	1	SDCBP	protein_coding	0	false	1.30804785368158	ENSG00000137575	6386	15.0	1	0.034801720246601	0	false	0	ENSG00000137575	0
134.829644037577	5.0	0.01124692502660399	0.2	0.0	9	3	CHML	protein_coding	2	false	-0.434589836915938	ENSG00000203668	1122	3.0	1	0.431170448706211	0	false	0	ENSG00000203668	66330
137.361143149204	5.5	0.007136786889337584	0.18181818181818182	0.0	10	2	RAB30	protein_coding	1	false	-0.53527397550406	ENSG00000137502	27314	2.5	1	0.425801362108599	0	false	0	ENSG00000137502	42090
3042.32865380901	2.5	0.0	0.4	0.0	4	1	TLR2	protein_coding	0	false	2.14402187104475	ENSG00000137462	7097	11.0	1	6.57205748815613E-4	0	false	0	ENSG00000137462	0
328.050862115946	2.0	0.0	0.5	0.0	3	1	CPEB2	protein_coding	0	false	1.25197192777403	ENSG00000137449	132864	293.0	1	0.0150899956204015	0	false	0	ENSG00000137449	0
194.326084863576	11.0	0.0	0.09090909090909091	0.0	21	1	FGFBP2	protein_coding	0	false	-1.49902014530729	ENSG00000137441	83888	3.0	1	0.0446950962603104	0	false	0	ENSG00000137441	0
906.875354613155	7.5	0.16288592738891608	0.13333333333333333	0.0	14	3	FAM8A1	protein_coding	2	false	1.32384801838721	ENSG00000137414	51439	3.3333333333333335	1	0.0515742580209644	0	false	0	ENSG00000137414	960638
326.904626338583	21.5	0.009087067782688994	0.046511627906976744	0.0	42	2	SGTB	protein_coding	1	false	0.257559077883312	ENSG00000197860	54557	7.0	1	0.686629128331451	0	false	0	ENSG00000197860	53592
728.691123455071	22.0	0.0	0.045454545454545456	0.0	43	1	RNF144B	protein_coding	0	false	1.52473649161275	ENSG00000137393	255488	2.0	1	0.0185394430837715	0	false	0	ENSG00000137393	0
928.789655409291	3.5	0.0	0.2857142857142857	0.0	6	1	FLOT1	protein_coding	0	false	1.56915360089435	ENSG00000137312	10211	16.0	1	0.00138568612066198	0	false	0	ENSG00000137312	0
39.1805940082662	20.5	0.23353859155197054	0.04878048780487805	0.0	40	3	PIDD1	protein_coding	2	false	0.0759013366068358	ENSG00000177595	55367	2.0	1	0.945409876677385	0	false	0	ENSG00000177595	1377320
295.067140068237	21.0	0.015621068323925007	0.047619047619047616	0.0	41	2	RIPK1	protein_coding	1	false	0.315238747699606	ENSG00000137275	8737	2.0	1	0.415319877117772	0	false	0	ENSG00000137275	92127
976.376334768639	5.0	0.011535346848860184	0.2	0.0	9	2	PTTG1IP	protein_coding	1	false	0.635569057591896	ENSG00000183255	754	4.0	1	0.0259079865309842	0	false	0	ENSG00000183255	68031
135.326117682161	5.5	0.010661942494691072	0.18181818181818182	0.0	10	2	SLC22A23	protein_coding	1	false	-0.904005652645982	ENSG00000137266	63027	2.0	1	0.38815697553602	0	false	0	ENSG00000137266	62880
612.633817567108	2.0	0.0	0.5	0.0	3	1	KIF13A	protein_coding	0	false	1.09586284813583	ENSG00000137177	63971	293.0	1	0.0157389215132769	0	false	0	ENSG00000137177	0
3354.25978170524	2.0	0.0	0.5	0.0	3	1	RPS6	protein_coding	0	false	-1.07565765124148	ENSG00000137154	6194	293.0	1	0.00161083246439886	0	false	0	ENSG00000137154	0
53.0094459488176	7.5	0.07449354077548676	0.13333333333333333	0.0	14	2	GRAMD1C	protein_coding	1	false	1.05788229397645	ENSG00000178075	54762	2.5	1	0.426032502876253	0	false	0	ENSG00000178075	439334
10726.7807633905	2.0	0.0	0.5	0.0	3	1	TLN1	protein_coding	0	false	1.22626158031491	ENSG00000137076	7094	293.0	1	0.00390384422957816	0	false	0	ENSG00000137076	0
2405.2136793727	4.0	0.0	0.25	0.0	7	1	UBAP2	protein_coding	0	false	-1.98243624766437	ENSG00000137073	55833	4.0	1	0.0166668885962926	0	false	0	ENSG00000137073	0
60.0392650956156	1.5	0.0	0.6666666666666666	0.0	2	1	POLR1E	protein_coding	0	false	-1.2697499470032	ENSG00000137054	64425	18.0	1	0.00910107034870178	0	false	0	ENSG00000137054	0
112.587602330077	5.0	0.003070395271849013	0.2	0.0	9	2	PDCL	protein_coding	1	false	-0.350285459310432	ENSG00000136940	5082	6.0	1	0.521488887507927	0	false	0	ENSG00000136940	18108
28.0663599153731	2.5	8.559396582888126E-4	0.4	0.0	4	2	DLC1	protein_coding	1	false	-0.0924624352472517	ENSG00000164741	10395	1.5	1	0.968977669582537	0	false	0	ENSG00000164741	5048
2882.36290111488	3.0	0.0	0.3333333333333333	0.0	5	1	HEMGN	protein_coding	0	false	-1.85121253825678	ENSG00000136929	55363	2.0	1	0.0263253630593815	0	false	0	ENSG00000136929	0
229.31917557109	2.5	0.0023216176310004795	0.4	0.0	4	3	USP20	protein_coding	2	false	-0.19199914977862	ENSG00000136878	10868	4.666666666666667	1	0.677121074084287	0	false	0	ENSG00000136878	13692
111.206921549283	2.0	0.0012844181678957518	0.5	0.0	3	2	ZNF189	protein_coding	1	false	0.640548153573644	ENSG00000136870	7743	13.5	1	0.22222488580565	0	false	0	ENSG00000136870	7575
3342.90110915303	22.5	0.0	0.044444444444444446	0.0	44	1	TLR4	protein_coding	0	false	1.79893802778211	ENSG00000136869	7099	20.0	1	0.0044720171260163	0	false	0	ENSG00000136869	0
193.482672005735	5.0	0.008034607905708277	0.2	0.0	9	2	TMEM41B	protein_coding	1	false	-0.294743171344461	ENSG00000166471	440026	2.0	1	0.517678570212059	0	false	0	ENSG00000166471	47385
17.0251165975877	5.5	0.006795970979440492	0.18181818181818182	0.0	10	2	SLC2A8	protein_coding	1	false	-0.51432553054529	ENSG00000136856	29988	2.0	1	0.691150218247892	0	false	0	ENSG00000136856	40080
4297.21168427944	7.0	0.06632684550967409	0.14285714285714285	0.0	13	2	C9orf78	protein_coding	1	false	-0.917420859409887	ENSG00000136819	51759	3.5	1	0.583482543832555	0	false	0	ENSG00000136819	391170
180.634569170779	16.0	0.0	0.0625	0.0	31	1	TOR1B	protein_coding	0	false	1.04362198487888	ENSG00000136816	27348	7.0	1	0.0306256385144939	0	false	0	ENSG00000136816	0
422.806695601683	2.0	0.0	0.5	0.0	3	1	LRRC8A	protein_coding	0	false	-2.16339997800012	ENSG00000136802	56262	293.0	1	0.00163898589365106	0	false	0	ENSG00000136802	0
186.038194667262	15.5	0.013368122555366478	0.06451612903225806	0.0	30	2	SULT1A1	protein_coding	1	false	1.00970499638614	ENSG00000196502	6817	2.5	1	0.236665763221503	0	false	0	ENSG00000196502	78840
23.785927509926	4.0	0.004018914774318826	0.25	0.0	7	3	HRAS	protein_coding	2	false	-0.105286144104263	ENSG00000174775	3265	3.3333333333333335	1	0.924917430142991	0	false	0	ENSG00000174775	23702
15085.9184574846	4.5	0.0	0.2222222222222222	0.0	8	1	GYPC	protein_coding	0	false	-2.0021419034119	ENSG00000136732	2995	3.0	1	0.0366921905495634	0	false	0	ENSG00000136732	0
115.066827612584	4.5	0.005425924933685024	0.2222222222222222	0.0	8	2	CCDC115	protein_coding	1	false	-0.565680760153454	ENSG00000136710	84317	13.5	1	0.333301059736483	0	false	0	ENSG00000136710	32000
552.451891929621	1.5	0.009524193860158995	0.6666666666666666	0.0	2	13	WDR33	protein_coding	12	false	-0.350459897544236	ENSG00000136709	55339	1.3076923076923077	1	0.229415816136721	0	false	0	ENSG00000136709	56170
457.735802167703	6.0	0.0	0.16666666666666666	0.0	11	1	IL1RN	protein_coding	0	false	1.83209997987147	ENSG00000136689	3557	3.0	1	0.0174095366746237	0	false	0	ENSG00000136689	0
145.793585007452	6.0	0.0	0.16666666666666666	0.0	11	1	HLX	protein_coding	0	false	1.72190672648037	ENSG00000136630	3142	5.0	1	0.00301180189143251	0	false	0	ENSG00000136630	0
116.74537840628	13.0	0.006689148082308569	0.07692307692307693	0.0	25	2	BLK	protein_coding	1	false	0.378420265380391	ENSG00000136573	640	5.5	1	0.771380336538237	0	false	0	ENSG00000136573	39450
27.7315065195726	15.0	0.11464555484491011	0.06666666666666667	0.0	29	3	LIPH	protein_coding	2	false	0.299215701104283	ENSG00000163898	200879	2.3333333333333335	1	0.875788609191906	0	false	0	ENSG00000163898	676135
348.210398907601	15.5	0.0	0.06451612903225806	0.0	30	1	BRIP1	protein_coding	0	false	-1.86586347764993	ENSG00000136492	83990	3.0	1	0.00729161865332002	0	false	0	ENSG00000136492	0
446.833911466099	2.0	0.0035327858122914837	0.5	0.0	3	4	SRSF1	protein_coding	3	false	0.290867151034639	ENSG00000136450	6426	2.25	1	0.425628524786733	0	false	0	ENSG00000136450	20835
263.35833610028	29.0	0.018315040053499623	0.034482758620689655	0.0	57	2	TTYH3	protein_coding	1	false	0.229248667139158	ENSG00000136295	80727	2.5	1	0.786535003949732	0	false	0	ENSG00000136295	108015
360.7852377578	2.5	0.0	0.4	0.0	4	1	SETDB2	protein_coding	0	false	-1.60960243207412	ENSG00000136169	83852	5.0	1	6.28703185592977E-4	0	false	0	ENSG00000136169	0
149.233451882659	2.0	0.0	0.5	0.0	3	1	TBC1D4	protein_coding	0	false	-1.34916719818606	ENSG00000136111	9882	293.0	1	0.0207171319169852	0	false	0	ENSG00000136111	0
352.900706502777	15.0	0.5496840076966746	0.06666666666666667	0.0	29	2	VPS36	protein_coding	1	false	-0.410830333254648	ENSG00000136100	51028	3.0	1	0.107592910181653	0	false	0	ENSG00000136100	3241823
171.72114504966	5.0	0.0	0.2	0.0	9	1	DRAM1	protein_coding	0	false	1.45933215794614	ENSG00000136048	55332	3.0	1	0.00193885957111863	0	false	0	ENSG00000136048	0
4238.71245563856	6.5	0.0	0.15384615384615385	0.0	12	1	PLXNC1	protein_coding	0	false	1.73807361448623	ENSG00000136040	10154	2.0	1	0.00272641560510139	0	false	0	ENSG00000136040	0
557.288536584591	2.0	0.0	0.5	0.0	3	1	CKAP4	protein_coding	0	false	1.32151697947918	ENSG00000136026	10970	293.0	1	0.0126280385816032	0	false	0	ENSG00000136026	0
494.916900192028	24.5	0.11256895163669635	0.04081632653061224	0.0	48	5	BRK1	protein_coding	4	false	-0.148171876910204	ENSG00000254999	55845	2.0	1	0.810635424841254	0	false	0	ENSG00000254999	663888
593.043567194531	25.0	0.012811626129355408	0.04	0.0	49	2	GCC2	protein_coding	1	false	-0.140816125294364	ENSG00000135968	9648	3.0	1	0.766911438953533	0	false	0	ENSG00000135968	75558
41.8103039099406	5.5	0.15077628029785617	0.18181818181818182	0.0	10	2	ZNF624	protein_coding	1	false	-0.299003029424067	ENSG00000197566	57547	3.0	1	0.65647353385499	0	false	0	ENSG00000197566	889220
65.2899335246595	3.0	0.0	0.3333333333333333	0.0	5	1	TSGA10	protein_coding	0	false	-1.57694951056648	ENSG00000135951	80705	7.0	1	0.0157389215132769	0	false	0	ENSG00000135951	0
186.181029074406	3.0	0.0010427949481925905	0.3333333333333333	0.0	5	2	ZHX1	protein_coding	1	false	-0.104960400784641	ENSG00000165156	11244	2.5	1	0.894463841774673	0	false	0	ENSG00000165156	6150
942.075011830468	3.5	0.0	0.2857142857142857	0.0	6	1	PIGC	protein_coding	0	false	-3.15726698433692	ENSG00000135845	5279	2.0	1	1.16258085678089E-4	0	false	0	ENSG00000135845	0
4057.16198045152	2.0	0.0	0.5	0.0	3	1	NIBAN1	protein_coding	0	false	1.46861708166797	ENSG00000135842	116496	293.0	1	0.0270568382728361	0	false	0	ENSG00000135842	0
201.760668997711	28.0	0.0	0.03571428571428571	0.0	55	1	COG2	protein_coding	0	false	-1.11082284698179	ENSG00000135775	22796	14.0	1	0.0219756089987427	0	false	0	ENSG00000135775	0
32.6390583066818	9.0	0.0035339727333707272	0.1111111111111111	0.0	17	2	SNUPN	protein_coding	1	false	-0.247864785729794	ENSG00000169371	10073	3.0	1	0.801506382210777	0	false	0	ENSG00000169371	20842
261.321249341817	9.5	0.0	0.10526315789473684	0.0	18	1	EGLN1	protein_coding	0	false	1.0829016149644	ENSG00000135766	54583	2.0	1	0.0468123701607041	0	false	0	ENSG00000135766	0
578.979471531264	2.0	0.06244357885869739	0.5	0.0	3	2	ZCCHC7	protein_coding	1	false	-1.42633794497624	ENSG00000147905	84186	14.5	1	0.00307857389895525	0	false	0	ENSG00000147905	368268
53.8189053079234	2.5	0.08242793863007604	0.4	0.0	4	4	MPHOSPH6	protein_coding	3	false	-0.298415752519575	ENSG00000135698	10200	2.0	1	0.681047516829069	0	false	0	ENSG00000135698	486128
3909.53688172958	10.5	0.0	0.09523809523809523	0.0	20	1	DYSF	protein_coding	0	false	2.51187443462956	ENSG00000135636	8291	6.0	1	5.37974375468489E-8	0	false	0	ENSG00000135636	0
708.588424904452	4.0	0.0	0.25	0.0	7	1	MICAL1	protein_coding	0	false	1.19180393242706	ENSG00000135596	64780	20.0	1	3.03443039718347E-4	0	false	0	ENSG00000135596	0
180.019094825292	16.0	0.5714509533689229	0.0625	0.0	31	4	VPS16	protein_coding	3	false	0.420904685157266	ENSG00000215305	64601	1.5	1	0.274734390200343	0	false	0	ENSG00000215305	3370196
186.83330640024	16.5	0.0	0.06060606060606061	0.0	32	1	ACVR1B	protein_coding	0	false	1.28613813169001	ENSG00000135503	91	4.0	1	0.0222251937508088	0	false	0	ENSG00000135503	0
177.874648367387	2.0	0.012828921265081528	0.5	0.0	3	4	RXRB	protein_coding	3	false	0.317664903342912	ENSG00000204231	6257	6.5	1	0.414990602483597	0	false	0	ENSG00000204231	75660
134.001908305995	2.5	0.0015436756436333894	0.4	0.0	4	2	TFCP2	protein_coding	1	false	-0.026351333329452	ENSG00000135457	7024	2.5	1	0.955231501852142	0	false	0	ENSG00000135457	9104
70.9841941642571	5.0	0.002435562054607865	0.2	0.0	9	2	TSPAN31	protein_coding	1	false	0.02760572563891	ENSG00000135452	6302	5.0	1	0.956071851011066	0	false	0	ENSG00000135452	14364
425.934012892977	8.5	0.003296249397213652	0.11764705882352941	0.0	16	2	KCMF1	protein_coding	1	false	0.09384642964477	ENSG00000176407	56888	1.5	1	0.89107018532842	0	false	0	ENSG00000176407	19440
187.511314630613	9.0	0.0	0.1111111111111111	0.0	17	1	TESPA1	protein_coding	0	false	-1.36903960399851	ENSG00000135426	9840	2.0	1	0.00701502000465194	0	false	0	ENSG00000135426	0
34.4940838948729	7.0	0.0	0.14285714285714285	0.0	13	1	ITGA7	protein_coding	0	false	3.77540084989191	ENSG00000135424	3679	5.0	1	7.81491941266996E-5	0	false	0	ENSG00000135424	0
120.729252559764	24.0	0.0	0.041666666666666664	0.0	47	1	AVIL	protein_coding	0	false	2.0214993947602	ENSG00000135407	10677	5.0	1	0.00877377549318293	0	false	0	ENSG00000135407	0
1679.32721817299	21.5	1.0748947201002712	0.046511627906976744	0.0	42	3	ZDHHC20	protein_coding	2	false	-0.340851820853973	ENSG00000180776	253832	5.666666666666667	1	0.516614058793078	0	false	0	ENSG00000180776	6339312
749.095479783003	22.0	0.0	0.045454545454545456	0.0	43	1	CD63	protein_coding	0	false	1.41201087718872	ENSG00000135404	967	3.0	1	0.00247873270264713	0	false	0	ENSG00000135404	0
16.9112960133783	6.5	0.006899741793797219	0.15384615384615385	0.0	12	3	MAGI2	protein_coding	2	false	-0.239756152929227	ENSG00000187391	9863	1.3333333333333333	1	0.920087026483297	0	false	0	ENSG00000187391	40692
288.382978810367	7.0	0.0	0.14285714285714285	0.0	13	1	PRRG4	protein_coding	0	false	1.92042921082542	ENSG00000135378	79056	3.0	1	0.00505857548472986	0	false	0	ENSG00000135378	0
970.695570230268	7.0	0.0	0.14285714285714285	0.0	13	1	PHF21A	protein_coding	0	false	1.04381510443682	ENSG00000135365	51317	11.0	1	0.00369782738988051	0	false	0	ENSG00000135365	0
337.481548837778	2.0	0.0	0.5	0.0	3	1	CEP162	protein_coding	0	false	-1.17265026494862	ENSG00000135315	22832	293.0	1	0.0272409865585667	0	false	0	ENSG00000135315	0
485.468822064447	12.0	0.0	0.08333333333333333	0.0	23	1	TRAFD1	protein_coding	0	false	1.08593497921733	ENSG00000135148	10906	3.0	1	0.013507210294156	0	false	0	ENSG00000135148	0
15.2813938469765	3.5	0.0013764893316142196	0.2857142857142857	0.0	6	2	HRK	protein_coding	1	false	0.307051995108663	ENSG00000135116	8739	2.0	1	0.889917932988251	0	false	0	ENSG00000135116	8118
200.020884913624	3.5	0.31956629225523825	0.2857142857142857	0.0	6	3	ZKSCAN8	protein_coding	2	false	-0.293661937095976	ENSG00000198315	7745	4.666666666666667	1	0.701604949352583	0	false	0	ENSG00000198315	1884678
435.777536195563	4.0	0.0	0.25	0.0	7	1	OASL	protein_coding	0	false	2.43775349097618	ENSG00000135114	8638	3.0	1	0.00503648904646032	0	false	0	ENSG00000135114	0
48.0505540217399	5.0	0.005624988554689594	0.2	0.0	9	2	USP30	protein_coding	1	false	0.213428698281712	ENSG00000135093	84749	2.5	1	0.74760477141866	0	false	0	ENSG00000135093	33174
36.9180406386085	15.5	0.08368810969592438	0.06451612903225806	0.0	30	7	NCR3	protein_coding	6	false	-0.610308961517649	ENSG00000204475	259197	1.7142857142857142	1	0.592411799589311	0	false	0	ENSG00000204475	493560
965.718884031981	16.0	0.0	0.0625	0.0	31	1	ADAM19	protein_coding	0	false	1.27835322056761	ENSG00000135074	8728	7.0	1	0.00380431991499178	0	false	0	ENSG00000135074	0
2588.93393700725	2.0	0.0	0.5	0.0	3	1	UBQLN1	protein_coding	0	false	-1.4264903366397	ENSG00000135018	29979	13.0	1	0.0268257621311992	0	false	0	ENSG00000135018	0
31.1218213752652	5.0	0.0023272131160883423	0.2	0.0	9	2	MEMO1	protein_coding	1	false	0.489019920391189	ENSG00000162959	51072	4.5	1	0.662435202938119	0	false	0	ENSG00000162959	13725
766.883654949524	5.0	0.0012895049725210816	0.2	0.0	9	2	OSTF1	protein_coding	1	false	0.709469005067263	ENSG00000134996	26578	4.5	1	0.151122934813754	0	false	0	ENSG00000134996	7605
2069.81222134885	22.5	0.0	0.044444444444444446	0.0	44	1	ETS1	protein_coding	0	false	-1.15888320076472	ENSG00000134954	2113	20.0	1	0.00281430802139856	0	false	0	ENSG00000134954	0
669.536466900578	7.5	0.0036248569760099513	0.13333333333333333	0.0	14	2	TPP2	protein_coding	1	false	-0.355556567994231	ENSG00000134900	7174	3.5	1	0.330110634317261	0	false	0	ENSG00000134900	21378
63.9359360970908	20.0	0.23612489258364233	0.05	0.0	39	2	ERCC5	protein_coding	1	false	-0.158251910608745	ENSG00000134899	2073	3.5	1	0.857527685176047	0	false	0	ENSG00000134899	1392573
34.802283971707	5.5	0.004308523517654265	0.18181818181818182	0.0	10	2	ABHD6	protein_coding	1	false	0.429579676326076	ENSG00000163686	57406	2.0	1	0.6485283706916	0	false	0	ENSG00000163686	25410
391.165219562574	6.0	0.0025161031278422524	0.16666666666666666	0.0	11	2	C5AR2	protein_coding	1	false	1.34156696788815	ENSG00000134830	27202	2.0	1	0.0258102908473927	0	false	0	ENSG00000134830	14839
119.661133132761	9.5	0.06246392607719871	0.10526315789473684	0.0	18	2	TMEM258	protein_coding	1	false	0.126087739264091	ENSG00000134825	746	3.0	1	0.883350952569932	0	false	0	ENSG00000134825	368388
537.046545143116	7.0	0.0	0.14285714285714285	0.0	13	1	DHX34	protein_coding	0	false	1.27904962843945	ENSG00000134815	9704	2.0	1	0.00993730815447354	0	false	0	ENSG00000134815	0
181.242753615889	5.5	0.055842941176869554	0.18181818181818182	0.0	10	2	MBOAT1	protein_coding	1	false	0.392481137769496	ENSG00000172197	154141	3.5	1	0.557411707656046	0	false	0	ENSG00000172197	329340
69.5043678997942	6.0	0.05921142319976289	0.16666666666666666	0.0	11	2	SLC43A3	protein_coding	1	false	-0.0912153938340423	ENSG00000134802	29015	2.0	1	0.925195930330159	0	false	0	ENSG00000134802	349206
294.82585629635	5.0	0.0	0.2	0.0	9	1	DSC2	protein_coding	0	false	1.98356464927017	ENSG00000134755	1824	8.0	1	0.0199089240218491	0	false	0	ENSG00000134755	0
43.596344336174	2.0	0.0	0.5	0.0	3	1	HOOK1	protein_coding	0	false	-1.60410430391756	ENSG00000134709	51361	293.0	1	0.0454592856801384	0	false	0	ENSG00000134709	0
54.8259712228451	2.0	6.022776676390377E-4	0.5	0.0	3	2	BAZ1A-AS1	lncRNA	1	false	0.78751298683187	ENSG00000258738	112268124	13.0	1	0.309075185044756	0	false	0	ENSG00000258738	3552
1528.8446631079	2.5	0.0	0.4	0.0	4	1	AGO4	protein_coding	0	false	1.16477229285573	ENSG00000134698	192670	2.0	1	0.0185685139278219	0	false	0	ENSG00000134698	0
141.958862586437	2.5	0.0034637748295411773	0.4	0.0	4	2	NOP9	protein_coding	1	false	-0.111974357065985	ENSG00000196943	161424	3.0	1	0.829144784217776	0	false	0	ENSG00000196943	20428
30.7264894432186	3.0	0.0033276180257365185	0.3333333333333333	0.0	5	3	CDCA8	protein_coding	2	false	0.298464239989524	ENSG00000134690	55143	1.3333333333333333	1	0.837049154272499	0	false	0	ENSG00000134690	19625
1717.09556664667	4.0	0.0	0.25	0.0	7	1	PHC2	protein_coding	0	false	2.05718699630791	ENSG00000134686	1912	20.0	1	0.00165343107357951	0	false	0	ENSG00000134686	0
1381.01412015006	5.0	0.004303436713028934	0.2	0.0	9	2	ANPEP	protein_coding	1	false	1.61157211886615	ENSG00000166825	290	2.0	1	0.00375682096525693	0	false	0	ENSG00000166825	25380
224.244623667578	5.5	0.0027824821300553512	0.18181818181818182	0.0	10	2	YARS1	protein_coding	1	false	-0.320445702308384	ENSG00000134684	8565	1.5	1	0.383033124218391	0	false	0	ENSG00000134684	16410
736.993390659103	2.0	5.987169044013069E-4	0.5	0.0	3	2	PPP1CC	protein_coding	1	false	-0.220029329684728	ENSG00000186298	5501	147.0	1	0.604749887937324	0	false	0	ENSG00000186298	3531
63.6440671617794	2.5	0.0	0.4	0.0	4	1	SPOCD1	protein_coding	0	false	1.68033235119388	ENSG00000134668	90853	2.0	1	0.0227889123575029	0	false	0	ENSG00000134668	0
26.0672387883219	10.5	0.7140822421007011	0.09523809523809523	0.0	20	4	TDRKH	protein_coding	3	false	-0.132868119806575	ENSG00000182134	11022	2.25	1	0.900861257973805	0	false	0	ENSG00000182134	4211380
47.4753755592738	11.0	0.0	0.09090909090909091	0.0	21	1	PIWIL4	protein_coding	0	false	1.31846942869165	ENSG00000134627	143689	4.0	1	0.0442662836292417	0	false	0	ENSG00000134627	0
683.467819864445	6.5	0.004671721367902806	0.15384615384615385	0.0	12	3	TTN	protein_coding	2	false	-0.313343223719295	ENSG00000155657	7273	2.3333333333333335	1	0.824464304838561	0	false	0	ENSG00000155657	27552
85.2582304291698	7.0	0.0	0.14285714285714285	0.0	13	1	MYBPC3	protein_coding	0	false	2.31590987218399	ENSG00000134571	4607	3.0	1	8.92884251793526E-5	0	false	0	ENSG00000134571	0
154.191783201364	3.0	9.927747027101818E-4	0.3333333333333333	0.0	5	2	UQCRFS1	protein_coding	1	false	-0.284898542217294	ENSG00000169021	7386	3.0	1	0.6601895275185	0	false	0	ENSG00000169021	5855
88.8799576382872	3.5	0.0	0.2857142857142857	0.0	6	1	ECHDC3	protein_coding	0	false	3.24598231935153	ENSG00000134463	79746	2.0	1	0.00470537528242236	0	false	0	ENSG00000134463	0
1292.56401633285	2.0	0.0	0.5	0.0	3	1	RPS15A	protein_coding	0	false	-1.02896185995115	ENSG00000134419	6210	293.0	1	0.00951968272340711	0	false	0	ENSG00000134419	0
1437.39932501503	15.0	0.0	0.06666666666666667	0.0	29	1	RSAD2	protein_coding	0	false	2.90279081991981	ENSG00000134321	91543	2.0	1	0.0421908494555942	0	false	0	ENSG00000134321	0
622.657958204332	2.0	9.568279500245184E-4	0.5	0.0	3	2	YWHAQ	protein_coding	1	false	-0.351822451551853	ENSG00000134308	10971	147.0	1	0.452229320172184	0	false	0	ENSG00000134308	5643
33.8943190637528	11.0	0.0010931543139833548	0.09090909090909091	0.0	21	2	AP4M1	protein_coding	1	false	0.736641594753272	ENSG00000221838	9179	2.5	1	0.435408518304801	0	false	0	ENSG00000221838	6447
675.684632532696	2.0	0.0	0.5	0.0	3	1	SORT1	protein_coding	0	false	1.26723584643929	ENSG00000134243	6272	293.0	1	0.00587688607574332	0	false	0	ENSG00000134243	0
346.593318795334	20.5	1.222155679281716	0.04878048780487805	0.0	40	3	CD3E	protein_coding	2	false	-1.42634255559271	ENSG00000198851	916	7.0	1	0.0165458957360767	0	false	0	ENSG00000198851	7207800
526.145092453218	21.0	0.010706028134777263	0.047619047619047616	0.0	41	2	PTPN22	protein_coding	1	false	0.0759775390993306	ENSG00000134242	26191	2.0	1	0.903143319814969	0	false	0	ENSG00000134242	63140
27.6936974827312	2.0	0.2401678848998544	0.5	0.0	3	2	CDKN2AIPNL	protein_coding	1	false	-0.873131043006549	ENSG00000237190	91368	7.5	1	0.397745639095036	0	false	0	ENSG00000237190	1416417
17.057853670304	2.5	0.31943573093652144	0.4	0.0	4	2	PSRC1	protein_coding	1	false	0.80889356666451	ENSG00000134222	84722	3.5	1	0.527978295447124	0	false	0	ENSG00000134222	1883908
869.672139830469	17.0	1.4354377670148528	0.058823529411764705	0.0	33	2	RHOG	protein_coding	1	false	1.07365288213406	ENSG00000177105	391	2.5	1	0.0345132939880317	0	false	0	ENSG00000177105	8465655
532.263715596853	17.5	1.4722484286860513	0.05714285714285714	0.0	34	3	VAV3	protein_coding	2	false	0.742353530645573	ENSG00000134215	10451	4.0	1	0.0294365656693333	0	false	0	ENSG00000134215	8682750
22.8705846119411	5.0	0.0	0.2	0.0	9	1	DPH6	protein_coding	0	false	-1.56572146261795	ENSG00000134146	89978	4.0	1	0.0342981973934765	0	false	0	ENSG00000134146	0
134.244707126317	4.5	0.020958991537591825	0.2222222222222222	0.0	8	7	TMEM14B	protein_coding	6	false	-0.897902065518114	ENSG00000137210	81853	5.285714285714286	1	0.0747683999033851	0	false	0	ENSG00000137210	123608
91.6774909567376	10.0	0.011749331763432387	0.1	0.0	19	2	THUMPD3	protein_coding	1	false	-0.640997895858632	ENSG00000134077	25917	2.5	1	0.185127211302157	0	false	0	ENSG00000134077	69293
71.0154245087039	15.5	0.11564341635224563	0.06451612903225806	0.0	30	4	TIRAP	protein_coding	3	false	0.695100642034789	ENSG00000150455	114609	2.75	1	0.0885285254488335	0	false	0	ENSG00000150455	682020
86.6467619786654	16.0	0.0	0.0625	0.0	31	1	IRAK2	protein_coding	0	false	1.23489658277325	ENSG00000134070	3656	4.0	1	0.0381464811315356	0	false	0	ENSG00000134070	0
44.7452410281774	19.5	0.4414037410395937	0.05128205128205128	0.0	38	4	GTF2H5	protein_coding	3	false	-0.330634978934514	ENSG00000272047	404672	3.25	1	0.699255958030952	0	false	0	ENSG00000272047	2603228
113.426953087261	20.0	0.0	0.05	0.0	39	1	CDK7	protein_coding	0	false	-1.17513440876209	ENSG00000134058	1022	4.0	1	0.0065437783879744	0	false	0	ENSG00000134058	0
1452.90256312462	2.0	0.0	0.5	0.0	3	1	NUMB	protein_coding	0	false	1.39588469787538	ENSG00000133961	8650	15.0	1	0.00253646531934933	0	false	0	ENSG00000133961	0
29.332433755564	17.0	0.5719592947111475	0.058823529411764705	0.0	33	3	NDUFAF8	protein_coding	2	false	-0.365953207518498	ENSG00000224877	284184	2.3333333333333335	1	0.767973380538243	0	false	0	ENSG00000224877	3373194
601.787462286646	17.5	0.0	0.05714285714285714	0.0	34	1	DGLUCY	protein_coding	0	false	1.13175879772477	ENSG00000133943	80017	3.0	1	0.0471402085601523	0	false	0	ENSG00000133943	0
414.750770225689	5.5	0.10656686129911565	0.18181818181818182	0.0	10	2	HSD17B4	protein_coding	1	false	0.327185921293256	ENSG00000133835	3295	2.5	1	0.596787835571044	0	false	0	ENSG00000133835	628490
607.442013226722	2.0	0.0	0.5	0.0	3	1	SBF2	protein_coding	0	false	1.34781401269358	ENSG00000133812	81846	293.0	1	0.00214192471626862	0	false	0	ENSG00000133812	0
19.4536966141567	4.5	0.006527387695223084	0.2222222222222222	0.0	8	3	LIN37	protein_coding	2	false	0.467956125278559	ENSG00000267796	55957	2.3333333333333335	1	0.632540306502596	0	false	0	ENSG00000267796	38496
239.726283240898	19.0	0.007183415931736439	0.05263157894736842	0.0	37	2	FBXO28	protein_coding	1	false	0.147993239096769	ENSG00000143756	23219	2.5	1	0.75664710647835	0	false	0	ENSG00000143756	42365
125.418176921087	19.5	0.0	0.05128205128205128	0.0	38	1	LRRCC1	protein_coding	0	false	-1.80193555087267	ENSG00000133739	85444	2.0	1	0.00503648904646032	0	false	0	ENSG00000133739	0
579.336356830252	1.0	3.899883546086111E-4	1.0	0.0	1	2	KRAS	protein_coding	1	false	0.713113250984966	ENSG00000133703	3845	16.0	1	0.0367699093482261	0	false	0	ENSG00000133703	2300
1466.67122423562	5.5	0.0	0.18181818181818182	0.0	10	1	RTN3	protein_coding	0	false	1.22445624950476	ENSG00000133318	10313	5.0	1	0.0124857579679802	0	false	0	ENSG00000133318	0
667.989936997467	10.0	0.0	0.1	0.0	19	1	SLF1	protein_coding	0	false	-1.33911851316947	ENSG00000133302	84250	2.0	1	0.0212842459974482	0	false	0	ENSG00000133302	0
15.6982156837146	2.5	0.0	0.4	0.0	4	1	BEX2	protein_coding	0	false	-2.18456799698225	ENSG00000133134	84707	7.0	1	0.0417096477851021	0	false	0	ENSG00000133134	0
12990.0926151626	23.5	0.0	0.0425531914893617	0.0	46	1	TPT1	protein_coding	0	false	-1.20810203541111	ENSG00000133112	7178	3.0	1	0.00863514392732364	0	false	0	ENSG00000133112	0
9.78410557805882	9.5	0.003473270198175126	0.10526315789473684	0.0	18	2	SLC29A2	protein_coding	1	false	-0.230292973876716	ENSG00000174669	3177	3.0	1	0.884798851685778	0	false	0	ENSG00000174669	20484
1095.19948181323	10.0	0.0	0.1	0.0	19	1	ALOX5AP	protein_coding	0	false	2.19563234751585	ENSG00000132965	241	2.0	1	0.00229331768245474	0	false	0	ENSG00000132965	0
337.867406539113	5.5	0.0	0.18181818181818182	0.0	10	1	CDK8	protein_coding	0	false	-1.59113055509425	ENSG00000132964	1024	6.0	1	0.0206908976736825	0	false	0	ENSG00000132964	0
270.332871674321	7.5	0.0	0.13333333333333333	0.0	14	1	PPP1R3D	protein_coding	0	false	1.44403311630196	ENSG00000132825	5509	2.0	1	0.0063433306541668	0	false	0	ENSG00000132825	0
9788.0825029888	3.5	0.0	0.2857142857142857	0.0	6	1	RBM38	protein_coding	0	false	-2.14733167863082	ENSG00000132819	55544	2.0	1	0.0296758575765882	0	false	0	ENSG00000132819	0
85.8075823637587	2.5	0.013788631737727068	0.4	0.0	4	2	IGHMBP2	protein_coding	1	false	0.130912791008734	ENSG00000132740	3508	3.5	1	0.861445399193931	0	false	0	ENSG00000132740	81320
693.640398812144	9.5	0.023015756207766806	0.10526315789473684	0.0	18	2	PDE7A	protein_coding	1	false	0.0914854746191903	ENSG00000205268	5150	2.5	1	0.894576183045656	0	false	0	ENSG00000205268	135738
595.72195314224	2.0	0.0	0.5	0.0	3	1	ARHGEF11	protein_coding	0	false	1.35472157701732	ENSG00000132694	9826	293.0	1	0.00211844843273977	0	false	0	ENSG00000132694	0
2228.43900632392	2.0	0.0	0.5	0.0	3	1	PTPRA	protein_coding	0	false	-1.6403315186242	ENSG00000132670	5786	293.0	1	0.0355008600653873	0	false	0	ENSG00000132670	0
123.157393183577	3.0	0.0031716226838930744	0.3333333333333333	0.0	5	2	TEX10	protein_coding	1	false	-0.534329237244668	ENSG00000136891	54881	2.0	1	0.318126571840898	0	false	0	ENSG00000136891	18705
365.243426992753	8.5	0.006397165496814643	0.11764705882352941	0.0	16	2	ZRANB2	protein_coding	1	false	0.159142735998876	ENSG00000132485	9406	2.5	1	0.741059724606212	0	false	0	ENSG00000132485	37728
91.8235243537168	23.0	0.05117579793312955	0.043478260869565216	0.0	45	3	JPT2	protein_coding	2	false	-0.0261607080429084	ENSG00000206053	90861	3.0	1	0.980553947564036	0	false	0	ENSG00000206053	301815
53.2689571668769	10.0	0.007657845243125523	0.1	0.0	19	2	COQ4	protein_coding	1	false	-0.395419168615382	ENSG00000167113	51117	2.5	1	0.604749887937324	0	false	0	ENSG00000167113	45163
237.53654834237	6.0	0.0	0.16666666666666666	0.0	11	1	CARD6	protein_coding	0	false	1.23486146044635	ENSG00000132357	84674	3.0	1	0.00703488925321719	0	false	0	ENSG00000132357	0
237.458002878566	7.0	0.002477612972843924	0.14285714285714285	0.0	13	2	EIF4E	protein_coding	1	false	0.24458454231206	ENSG00000151247	1977	2.0	1	0.597395021831452	0	false	0	ENSG00000151247	14612
2445.6017504177	7.5	0.0	0.13333333333333333	0.0	14	1	TRIM22	protein_coding	0	false	1.45182105535735	ENSG00000132274	10346	2.0	1	0.0140069456925256	0	false	0	ENSG00000132274	0
24.5074716727778	5.0	0.0	0.2	0.0	9	1	PPARG	protein_coding	0	false	3.64137905006704	ENSG00000132170	5468	6.0	1	0.0176405039509603	0	false	0	ENSG00000132170	0
219.764847444187	2.5	0.2635487041195657	0.4	0.0	4	4	PURA	protein_coding	3	false	-0.117021007490073	ENSG00000185129	5813	2.5	1	0.847452055774353	0	false	0	ENSG00000185129	1554308
1507.78522333143	3.0	0.0	0.3333333333333333	0.0	5	1	RAF1	protein_coding	0	false	1.12418962255532	ENSG00000132155	5894	4.0	1	0.0174095366746237	0	false	0	ENSG00000132155	0
346.069528690632	2.0	0.0	0.5	0.0	3	1	TRIM21	protein_coding	0	false	1.30964425861071	ENSG00000132109	6737	293.0	1	0.0258895928596094	0	false	0	ENSG00000132109	0
169.68196944019	4.5	0.0022653236598134978	0.2222222222222222	0.0	8	2	DCAF15	protein_coding	1	false	0.25923531968111	ENSG00000132017	90379	3.0	1	0.669085230084215	0	false	0	ENSG00000132017	13360
1696.31666446063	23.0	0.0	0.043478260869565216	0.0	45	1	LGALS3	protein_coding	0	false	-1.87230338399703	ENSG00000131981	3958	6.0	1	0.0375174142564182	0	false	0	ENSG00000131981	0
72.3981979204852	1.5	7.477602799234674E-4	0.6666666666666666	0.0	2	2	THAP1	protein_coding	1	false	0.115318431819902	ENSG00000131931	55145	2.5	1	0.907139834785269	0	false	0	ENSG00000131931	4410
77.8240262098995	18.5	0.0	0.05405405405405406	0.0	36	1	SNRPA1	protein_coding	0	false	-1.04935073901253	ENSG00000131876	6627	8.0	1	0.0259768870439412	0	false	0	ENSG00000131876	0
592.279199758459	2.0	0.0	0.5	0.0	3	1	CHSY1	protein_coding	0	false	1.13708938903162	ENSG00000131873	22856	293.0	1	0.00962585802457442	0	false	0	ENSG00000131873	0
317.648029889491	5.0	0.07373068964184148	0.2	0.0	9	2	SCYL1	protein_coding	1	false	0.386208973972982	ENSG00000142186	57410	3.0	1	0.494249985557829	0	false	0	ENSG00000142186	434835
15.316058594426	5.5	0.08003578397493766	0.18181818181818182	0.0	10	2	CHD1L	protein_coding	1	false	-0.468693923389827	ENSG00000131778	9557	2.0	1	0.754133507054373	0	false	0	ENSG00000131778	472020
759.13879594921	2.0	0.0	0.5	0.0	3	1	RARA	protein_coding	0	false	1.13571564382164	ENSG00000131759	5914	15.0	1	0.014705740056705	0	false	0	ENSG00000131759	0
74.3240080607521	3.0	9.622538749582035E-4	0.3333333333333333	0.0	5	2	ZCCHC9	protein_coding	1	false	0.147155143532539	ENSG00000131732	84240	4.0	1	0.804187902197105	0	false	0	ENSG00000131732	5675
635.150025322961	6.5	0.0038659715152505798	0.15384615384615385	0.0	12	2	NINJ1	protein_coding	1	false	1.03372083243592	ENSG00000131669	4814	2.5	1	0.13714490552366	0	false	0	ENSG00000131669	22800
69.1609543605365	14.0	0.0	0.07142857142857142	0.0	27	1	TMEM204	protein_coding	0	false	-1.45533135241069	ENSG00000131634	79652	6.0	1	0.0107931884640384	0	false	0	ENSG00000131634	0
7.74387971940204	6.0	0.1637873091685245	0.16666666666666666	0.0	11	4	EDAR	protein_coding	3	false	-1.71975929149617	ENSG00000135960	10913	2.75	1	0.318126571840898	0	false	0	ENSG00000135960	965954
1351.6548210004	2.0	0.19993939920089693	0.5	0.0	3	3	RPL14	protein_coding	2	false	-1.07487527325102	ENSG00000188846	9045	10.333333333333334	1	0.00576667533196827	0	false	0	ENSG00000188846	1179165
46.7800309557317	2.5	0.001526041387598913	0.4	0.0	4	2	TUBG1	protein_coding	1	false	0.0587798649315296	ENSG00000131462	7283	2.0	1	0.969272395306314	0	false	0	ENSG00000131462	9000
2244.44811943917	5.0	0.0	0.2	0.0	9	1	SLC6A6	protein_coding	0	false	1.3553401884204	ENSG00000131389	6533	8.0	1	0.00588571655686193	0	false	0	ENSG00000131389	0
7.44713740802162	5.5	0.004213569831314777	0.18181818181818182	0.0	10	2	SHPK	protein_coding	1	false	1.03808257982242	ENSG00000197417	23729	2.5	1	0.629099758483021	0	false	0	ENSG00000197417	24850
75.1871847433022	26.0	0.01943108498829696	0.038461538461538464	0.0	51	2	SFMBT1	protein_coding	1	false	-0.421684752231898	ENSG00000163935	51460	3.0	1	0.538076648775125	0	false	0	ENSG00000163935	114597
846.496174722714	2.5	0.0	0.4	0.0	4	1	LILRB2	protein_coding	0	false	1.08841891039805	ENSG00000131042	10288	12.0	1	0.0289166098684431	0	false	0	ENSG00000131042	0
539.763267797933	2.0	0.0	0.5	0.0	3	1	ZNF236	protein_coding	0	false	-1.58718290672609	ENSG00000130856	7776	293.0	1	0.005410555870218	0	false	0	ENSG00000130856	0
742.206069006984	2.0	0.0	0.5	0.0	3	1	DNMT1	protein_coding	0	false	-1.36569468228953	ENSG00000130816	1786	293.0	1	0.0289166098684431	0	false	0	ENSG00000130816	0
8.36609208853058	4.5	0.0038062863409800444	0.2222222222222222	0.0	8	2	NOTCH2NLA	protein_coding	1	false	0.463084938674424	ENSG00000264343	388677	5.5	1	0.863739983393506	0	false	0	ENSG00000264343	22448
1582.65354938382	5.0	0.0026064786900189436	0.2	0.0	9	2	THEMIS2	protein_coding	1	false	0.704928967825868	ENSG00000130775	9473	1.5	1	0.0296002375792888	0	false	0	ENSG00000130775	15372
414.965063280283	24.5	0.008920220590978179	0.04081632653061224	0.0	48	2	ATG13	protein_coding	1	false	0.155925685425366	ENSG00000175224	9776	2.0	1	0.740308004340308	0	false	0	ENSG00000175224	52608
116.222604460058	25.0	0.0	0.04	0.0	49	1	SESN2	protein_coding	0	false	1.40019153684004	ENSG00000130766	83667	2.0	1	0.0367263723034377	0	false	0	ENSG00000130766	0
200.973632360705	33.0	0.0	0.030303030303030304	0.0	65	1	CEP85	protein_coding	0	false	-1.15312372798721	ENSG00000130695	64793	6.0	1	0.0473215253866565	0	false	0	ENSG00000130695	0
1256.74528056201	2.0	0.0	0.5	0.0	3	1	HELZ2	protein_coding	0	false	1.56318494651142	ENSG00000130589	85441	293.0	1	0.018975489571227	0	false	0	ENSG00000130589	0
279.168000381599	14.5	0.005550042966543069	0.06896551724137931	0.0	28	2	UBAC1	protein_coding	1	false	-0.289289722914161	ENSG00000130560	10422	3.0	1	0.736577976826943	0	false	0	ENSG00000130560	32732
330.105053269954	3.5	0.0	0.2857142857142857	0.0	6	1	ARPC1B	protein_coding	0	false	1.02616213156532	ENSG00000130429	10095	16.0	1	0.0274132774071169	0	false	0	ENSG00000130429	0
34.6943260992754	8.5	0.00849971140861759	0.11764705882352941	0.0	16	3	ASGR1	protein_coding	2	false	-0.0543348735652745	ENSG00000141505	432	2.3333333333333335	1	0.975089323640731	0	false	0	ENSG00000141505	50128
213.506886533713	9.0	0.0	0.1111111111111111	0.0	17	1	PLVAP	protein_coding	0	false	-3.19320961708054	ENSG00000130300	83483	3.0	1	9.29733151984891E-4	0	false	0	ENSG00000130300	0
741.706510910637	2.5	0.003303710043997469	0.4	0.0	4	2	RPL36	protein_coding	1	false	-0.902755410167115	ENSG00000130255	25873	6.5	1	0.00339463355223511	0	false	0	ENSG00000130255	19484
238.293619212489	4.5	0.0386027429407021	0.2222222222222222	0.0	8	6	RAB4A	protein_coding	5	false	-0.1677911866379	ENSG00000168118	5867	5.833333333333333	1	0.853896037082874	0	false	0	ENSG00000168118	227664
73.7140490648231	5.0	0.0	0.2	0.0	9	1	NECTIN2	protein_coding	0	false	3.31896734743923	ENSG00000130202	5819	6.0	1	0.00411783067533562	0	false	0	ENSG00000130202	0
439.344512687916	5.0	0.0	0.2	0.0	9	1	MOSPD2	protein_coding	0	false	1.28780376195942	ENSG00000130150	158747	11.0	1	0.0457565173011966	0	false	0	ENSG00000130150	0
3701.058112244	7.0	0.0	0.14285714285714285	0.0	13	1	SAT1	protein_coding	0	false	1.1590394370313	ENSG00000130066	6303	11.0	1	0.011633684324705	0	false	0	ENSG00000130066	0
625.848107905874	26.5	0.010254319884047985	0.03773584905660377	0.0	52	2	GSE1	protein_coding	1	false	-1.581389321387	ENSG00000131149	23199	2.0	1	0.0126784930227151	0	false	0	ENSG00000131149	60476
64.1492589991403	13.0	0.0	0.07692307692307693	0.0	25	1	SGO1	protein_coding	0	false	-1.77983804536437	ENSG00000129810	151648	11.0	1	0.0123037510480673	0	false	0	ENSG00000129810	0
18.7857366048371	5.0	0.024587578836993685	0.2	0.0	9	2	DNAJC18	protein_coding	1	false	-0.486016999072838	ENSG00000170464	202052	2.0	1	0.729778965460219	0	false	0	ENSG00000170464	145008
16.9297650920836	5.5	0.025486586774443622	0.18181818181818182	0.0	10	2	CHRNA10	protein_coding	1	false	1.66918104019241	ENSG00000129749	57053	2.5	1	0.102537951226368	0	false	0	ENSG00000129749	150310
1290.04768855596	4.0	0.0	0.25	0.0	7	1	ASH2L	protein_coding	0	false	-1.77996204464996	ENSG00000129691	9070	20.0	1	0.0166488293450695	0	false	0	ENSG00000129691	0
249.88445753093	1.0	0.08463374667577318	1.0	0.0	1	4	STRBP	protein_coding	3	false	-0.609746001536951	ENSG00000165209	55342	12.0	1	0.347707168445486	0	false	0	ENSG00000165209	499137
145.382704030938	1.5	7.898111981595263E-4	0.6666666666666666	0.0	2	2	NEDD8	protein_coding	1	false	5.30353571665426E-4	ENSG00000129559	4738	2.5	1	0.999224293087065	0	false	0	ENSG00000129559	4658
197.900367434593	2.5	0.020826734617333253	0.4	0.0	4	3	THOC7	protein_coding	2	false	-0.537483381726322	ENSG00000163634	80145	3.0	1	0.414154946736039	0	false	0	ENSG00000163634	122828
42.5342141827884	3.0	0.0060753403241854504	0.3333333333333333	0.0	5	3	BCL2L2	protein_coding	2	false	0.64389628361292	ENSG00000129473	599	2.3333333333333335	1	0.416634011456523	0	false	0	ENSG00000129473	35830
33.0415543359415	5.5	0.0018210760558680361	0.18181818181818182	0.0	10	2	C1orf50	protein_coding	1	false	-0.268528224705773	ENSG00000164008	79078	1.5	1	0.735905301692222	0	false	0	ENSG00000164008	10740
55.5329720373007	6.0	0.0	0.16666666666666666	0.0	11	1	ADCY4	protein_coding	0	false	1.81064161617904	ENSG00000129467	196883	2.0	1	0.0156998156011272	0	false	0	ENSG00000129467	0
57.1751486492763	4.0	0.0012723793969491382	0.25	0.0	7	2	NCAM1	protein_coding	1	false	-0.632639815058261	ENSG00000149294	4684	4.5	1	0.545287387191475	0	false	0	ENSG00000149294	7504
449.67322390655	4.5	0.0	0.2222222222222222	0.0	8	1	SIGLEC9	protein_coding	0	false	1.46548679860111	ENSG00000129450	27180	2.0	1	0.00937166212696206	0	false	0	ENSG00000129450	0
1406.74854047427	3.0	0.0	0.3333333333333333	0.0	5	1	PHF20L1	protein_coding	0	false	1.01090719900513	ENSG00000129292	51105	8.0	1	0.0114184840583742	0	false	0	ENSG00000129292	0
45.4991889287255	5.0	0.0	0.2	0.0	9	1	ALDH1A2	protein_coding	0	false	3.34813070163689	ENSG00000128918	8854	2.0	1	7.37662845188155E-4	0	false	0	ENSG00000128918	0
7.50156506109646	7.0	0.0258981092686328	0.14285714285714285	0.0	13	2	IGLC7	IG_C_gene	1	false	1.12552371832577	ENSG00000211685		4.0	1	0.519074611471409	0	false	0	ENSG00000211685	152737
58.5766805512992	13.5	0.0047039377971965605	0.07407407407407407	0.0	26	2	CIP2A	protein_coding	1	false	-0.157967764980361	ENSG00000163507	57650	2.0	1	0.894463841774673	0	false	0	ENSG00000163507	27742
272.215895414934	14.0	0.0	0.07142857142857142	0.0	27	1	LRRC4	protein_coding	0	false	1.55921884577651	ENSG00000128594	64101	2.0	1	0.0258596915758969	0	false	0	ENSG00000128594	0
120.233815198839	4.0	0.0023073745780495566	0.25	0.0	7	2	POT1	protein_coding	1	false	-0.070964782914096	ENSG00000128513	25913	10.5	1	0.927567365731374	0	false	0	ENSG00000128513	13608
352.504992203069	2.0	0.0	0.5	0.0	3	1	DOCK4	protein_coding	0	false	2.39335919158552	ENSG00000128512	9732	293.0	1	0.00115684225579102	0	false	0	ENSG00000128512	0
438.825956060301	14.0	0.004866545985052933	0.07142857142857142	0.0	27	2	VHL	protein_coding	1	false	-0.154659532801318	ENSG00000134086	7428	3.5	1	0.734764467455819	0	false	0	ENSG00000134086	28701
996.632988875336	14.5	0.0	0.06896551724137931	0.0	28	1	APOBEC3A	protein_coding	0	false	2.52131472371749	ENSG00000128383		2.0	1	2.41220831884172E-6	0	false	0	ENSG00000128383	0
362.088291667838	27.0	0.0	0.037037037037037035	0.0	53	1	APOL2	protein_coding	0	false	1.08248269071117	ENSG00000128335	23780	6.0	1	0.0408452690921597	0	false	0	ENSG00000128335	0
8.65813598725457	15.0	0.00440585104615224	0.06666666666666667	0.0	29	2	ADORA2A	protein_coding	1	false	0.221418780580435	ENSG00000128271	135	2.0	1	0.911210322072536	0	false	0	ENSG00000128271	25984
812.554365152483	2.0	0.0	0.5	0.0	3	1	YWHAH	protein_coding	0	false	1.17712960789777	ENSG00000128245	7533	293.0	1	0.0189245623341639	0	false	0	ENSG00000128245	0
328.789297508828	2.0	0.0	0.5	0.0	3	1	POR	protein_coding	0	false	1.46046522096474	ENSG00000127948	5447	293.0	1	0.0073134949545409	0	false	0	ENSG00000127948	0
469.302519023577	2.0	0.0	0.5	0.0	3	1	HIP1	protein_coding	0	false	1.37694874607756	ENSG00000127946	3092	293.0	1	7.4915728694805E-4	0	false	0	ENSG00000127946	0
1271.26919591066	2.0	7.299564637348134E-4	0.5	0.0	3	2	AKAP9	protein_coding	1	false	-0.134844419437191	ENSG00000127914	10142	147.0	1	0.823052898841811	0	false	0	ENSG00000127914	4305
1063.22121160876	2.0	0.0010951890358334867	0.5	0.0	3	2	TUBA4A	protein_coding	1	false	0.591894119132499	ENSG00000127824	7277	147.0	1	0.312369585376096	0	false	0	ENSG00000127824	6459
158.799048201524	3.5	0.0	0.2857142857142857	0.0	6	1	METTL25	protein_coding	0	false	-1.02252401869544	ENSG00000127720	84190	2.0	1	0.0438495297708232	0	false	0	ENSG00000127720	0
36.7696201507893	8.5	0.005401508271483442	0.11764705882352941	0.0	16	2	GFER	protein_coding	1	false	0.169555786111719	ENSG00000127554	2671	2.5	1	0.875662629269947	0	false	0	ENSG00000127554	31856
87.0247089060378	21.5	0.007491845852185597	0.046511627906976744	0.0	42	2	MFSD5	protein_coding	1	false	0.29642979086479	ENSG00000182544	84975	7.0	1	0.684547743216781	0	false	0	ENSG00000182544	44184
1237.45606301535	22.0	0.0	0.045454545454545456	0.0	43	1	ADGRE2	protein_coding	0	false	1.58466829544791	ENSG00000127507	30817	2.0	1	0.0065437783879744	0	false	0	ENSG00000127507	0
2960.30894580292	13.0	0.0	0.07692307692307693	0.0	25	1	HP1BP3	protein_coding	0	false	-1.55088474047063	ENSG00000127483	50809	10.0	1	0.0103090252126603	0	false	0	ENSG00000127483	0
1675.27475490494	28.0	0.02152396597131178	0.03571428571428571	0.0	55	2	RAP1B	protein_coding	1	false	-0.0642186258389804	ENSG00000127314	5908	3.0	1	0.913218170683602	0	false	0	ENSG00000127314	126940
385.691086565864	5.5	0.0	0.18181818181818182	0.0	10	1	BCL11B	protein_coding	0	false	-1.31838920436828	ENSG00000127152	64919	3.0	1	0.0313149975665439	0	false	0	ENSG00000127152	0
31.4252859609182	13.5	1.2580410511915672	0.07407407407407407	0.0	26	5	ARL2	protein_coding	4	false	0.498312943936328	ENSG00000213465	402	1.8	1	0.527243393796117	0	false	0	ENSG00000213465	7419438
15.8539299896601	28.0	0.1409968984056598	0.03571428571428571	0.0	55	2	PIGW	protein_coding	1	false	-1.06101869231366	ENSG00000277161	284098	9.0	1	0.348972321153647	0	false	0	ENSG00000277161	831545
54.1002809849845	28.5	0.13362832278556136	0.03508771929824561	0.0	56	4	IPPK	protein_coding	3	false	0.503400317802883	ENSG00000127080	64768	2.25	1	0.263053598228574	0	false	0	ENSG00000127080	788088
94.80399135168	17.0	0.0	0.058823529411764705	0.0	33	1	DYNC2I1	protein_coding	0	false	-1.93112260698479	ENSG00000126870	55112	3.0	1	9.11745364056333E-5	0	false	0	ENSG00000126870	0
1245.75825498707	12.0	0.0	0.08333333333333333	0.0	23	1	RHOT1	protein_coding	0	false	-1.0796153666857	ENSG00000126858	55288	2.0	1	0.0336075084428971	0	false	0	ENSG00000126858	0
78.290721268897	12.5	0.006629123787729678	0.08	0.0	24	2	ELK1	protein_coding	1	false	-0.104604257009778	ENSG00000126767	2002	1.5	1	0.901797210447645	0	false	0	ENSG00000126767	39096
236.890159581605	10.5	0.0	0.09523809523809523	0.0	20	1	CFP	protein_coding	0	false	1.33077684087638	ENSG00000126759	5199	2.0	1	0.037698456813257	0	false	0	ENSG00000126759	0
490.723067924815	4.5	0.0	0.2222222222222222	0.0	8	1	IFI6	protein_coding	0	false	2.26223598455592	ENSG00000126709	2537	5.0	1	0.0304094134914215	0	false	0	ENSG00000126709	0
31.7051672783224	8.0	0.6188479337060492	0.1250	0.0	15	4	TYMS	protein_coding	3	false	-0.0476998170903948	ENSG00000176890	7298	4.0	1	0.978204656743904	0	false	0	ENSG00000176890	3649725
427.946463390768	8.5	0.0	0.11764705882352941	0.0	16	1	SBDS	protein_coding	0	false	-1.82831223503217	ENSG00000126524	51119	4.0	1	0.00766088450404886	0	false	0	ENSG00000126524	0
295.131888472148	6.5	0.06963428587706347	0.15384615384615385	0.0	12	2	FRMD8	protein_coding	1	false	0.529447137248541	ENSG00000126391	83786	3.0	1	0.157970300304836	0	false	0	ENSG00000126391	410676
91.6662517960138	3.0	8.783215986402633E-4	0.3333333333333333	0.0	5	2	C1D	protein_coding	1	false	-0.267739642897376	ENSG00000197223	10438	2.5	1	0.834488249108531	0	false	0	ENSG00000197223	5180
14.7190231190298	3.5	0.0	0.2857142857142857	0.0	6	1	NR1D1	protein_coding	0	false	-1.86164144306899	ENSG00000126368	9572	2.0	1	0.0304094134914215	0	false	0	ENSG00000126368	0
275.249650179678	2.5	0.0	0.4	0.0	4	1	CCR7	protein_coding	0	false	-1.55102084981218	ENSG00000126353	1236	2.0	1	0.00661869532042734	0	false	0	ENSG00000126353	0
800.580428213224	21.0	0.0	0.047619047619047616	0.0	41	1	FFAR2	protein_coding	0	false	1.65227087744273	ENSG00000126262	2867	14.0	1	0.0446950962603104	0	false	0	ENSG00000126262	0
8.57469569924952	2.0	0.0	0.5	0.0	3	1	LRFN3	protein_coding	0	false	-2.18142877809546	ENSG00000126243	79414	293.0	1	0.0366921905495634	0	false	0	ENSG00000126243	0
51.7904788784382	8.5	0.06127768323857182	0.11764705882352941	0.0	16	2	LRATD2	protein_coding	1	false	-1.21783942485297	ENSG00000168672	157638	2.5	1	0.0562231911953439	0	false	0	ENSG00000168672	361392
1931.64880859754	16.0	0.032689332563756314	0.0625	0.0	31	2	PIK3AP1	protein_coding	1	false	1.11199626795413	ENSG00000155629	118788	3.5	1	0.022555497025228	0	false	0	ENSG00000155629	192789
96.6672260303583	16.5	0.02815512448089159	0.06060606060606061	0.0	32	3	DYNLRB1	protein_coding	2	false	0.345217340534495	ENSG00000125971	83658	1.6666666666666667	1	0.550450757868749	0	false	0	ENSG00000125971	166048
85.5502066105586	4.0	0.006257447929772254	0.25	0.0	7	2	HIKESHI	protein_coding	1	false	-0.135407349829428	ENSG00000149196	51501	2.0	1	0.827015779019232	0	false	0	ENSG00000149196	36904
17.7317414167386	4.5	0.005756906354639811	0.2222222222222222	0.0	8	2	SIRPD	protein_coding	1	false	1.39312547101485	ENSG00000125900	128646	2.0	1	0.168567137358894	0	false	0	ENSG00000125900	33952
244.373781094021	9.0	0.050204896490308286	0.1111111111111111	0.0	17	2	AP5Z1	protein_coding	1	false	0.613751973594787	ENSG00000242802	9907	2.0	1	0.203948850677854	0	false	0	ENSG00000242802	296089
51.037792101063	9.5	0.05002668876826757	0.10526315789473684	0.0	18	2	AP5S1	protein_coding	1	false	-0.084778702652339	ENSG00000125843	55317	2.0	1	0.929638177138948	0	false	0	ENSG00000125843	295038
2242.59048186873	2.0	0.0	0.5	0.0	3	1	VASP	protein_coding	0	false	1.18479289972477	ENSG00000125753	7408	293.0	1	0.0219756089987427	0	false	0	ENSG00000125753	0
42.1449056965985	7.0	0.0	0.14285714285714285	0.0	13	1	RTN2	protein_coding	0	false	2.08252486604025	ENSG00000125744	6253	3.0	1	0.0274520753619265	0	false	0	ENSG00000125744	0
154.471327747046	7.5	0.7632733384291812	0.13333333333333333	0.0	14	3	SYS1	protein_coding	2	false	-0.13129156446081	ENSG00000204070	90196	2.3333333333333335	1	0.864939110277285	0	false	0	ENSG00000204070	4501490
302.160857349941	8.0	0.0	0.1250	0.0	15	1	TNFSF14	protein_coding	0	false	1.74087015013159	ENSG00000125735	8740	3.0	1	0.0147772138904919	0	false	0	ENSG00000125735	0
28.4715067318691	18.0	0.0644438799975312	0.05555555555555555	0.0	35	3	RIN1	protein_coding	2	false	0.601147781063268	ENSG00000174791	9610	2.6666666666666665	1	0.640110730841848	0	false	0	ENSG00000174791	380065
13.7958498365924	18.5	0.011585706214650947	0.05405405405405406	0.0	36	2	TRIP10	protein_coding	1	false	0.659648480154109	ENSG00000125733	9322	2.0	1	0.708444145902564	0	false	0	ENSG00000125733	68328
104.048976888825	9.5	0.33199335595491875	0.10526315789473684	0.0	18	7	SLC25A30	protein_coding	6	false	-0.162936050462737	ENSG00000174032	253512	2.0	1	0.809307332321396	0	false	0	ENSG00000174032	1957968
99.6958184488923	10.0	0.0	0.1	0.0	19	1	OPRL1	protein_coding	0	false	1.59985322239978	ENSG00000125510	4987	7.0	1	0.0324270196763309	0	false	0	ENSG00000125510	0
1249.30897866915	20.5	0.0	0.04878048780487805	0.0	40	1	MBOAT7	protein_coding	0	false	1.32099860722096	ENSG00000125505	79143	6.0	1	0.0165309275810828	0	false	0	ENSG00000125505	0
357.930763767424	17.0	0.005679417364180621	0.058823529411764705	0.0	33	2	SS18	protein_coding	1	false	-0.314181664037551	ENSG00000141380	6760	1.5	1	0.312041819888517	0	false	0	ENSG00000141380	33495
3008.37422642718	17.5	0.0	0.05714285714285714	0.0	34	1	IRF1	protein_coding	0	false	1.12181137820367	ENSG00000125347	3659	2.0	1	0.0289166098684431	0	false	0	ENSG00000125347	0
410.348913306948	5.0	0.0023058485366619576	0.2	0.0	9	2	RAP2A	protein_coding	1	false	0.125774226199493	ENSG00000125249	5911	4.0	1	0.879364096466041	0	false	0	ENSG00000125249	13599
223.368735424998	9.0	0.06218754302588913	0.1111111111111111	0.0	17	2	UROD	protein_coding	1	false	-0.325736313582953	ENSG00000126088	7389	2.0	1	0.72859920802475	0	false	0	ENSG00000126088	366758
156.310260657904	9.5	0.0627569260236177	0.10526315789473684	0.0	18	2	CPNE5	protein_coding	1	false	0.679593789998221	ENSG00000124772	57699	2.5	1	0.362126298548812	0	false	0	ENSG00000124772	370116
83.9799425386031	4.5	0.0029503466826912316	0.2222222222222222	0.0	8	2	HPRT1	protein_coding	1	false	-0.853439217922631	ENSG00000165704	3251	3.5	1	0.158440183741824	0	false	0	ENSG00000165704	17400
270.094337527273	2.0	0.0	0.5	0.0	3	1	RPS10	protein_coding	0	false	-1.28174452035043	ENSG00000124614	6204	293.0	1	0.00910107034870178	0	false	0	ENSG00000124614	0
10.8588060662978	5.0	0.09920184644225494	0.2	0.0	9	3	PARS2	protein_coding	2	false	0.608863423783669	ENSG00000162396	25973	1.6666666666666667	1	0.716676362949412	0	false	0	ENSG00000162396	585054
320.34071755741	5.5	0.0	0.18181818181818182	0.0	10	1	NQO2	protein_coding	0	false	1.4601393130234	ENSG00000124588	4835	3.0	1	0.022555220237569	0	false	0	ENSG00000124588	0
45.7242957107737	8.0	0.07769331044497332	0.1250	0.0	15	4	SIRT3	protein_coding	3	false	0.437431412148094	ENSG00000142082	23410	3.25	1	0.497795508806811	0	false	0	ENSG00000142082	458205
154.216478932695	9.5	0.029812744548132365	0.10526315789473684	0.0	18	3	SEC11C	protein_coding	2	false	0.153819077162961	ENSG00000166562	90701	2.0	1	0.894909463491123	0	false	0	ENSG00000166562	175824
7.87253895326131	5.5	0.001002100511189953	0.18181818181818182	0.0	10	2	MT-ATP8	protein_coding	1	false	-1.53130886480546	ENSG00000228253	4509	2.0	1	0.368850402233173	0	false	0	ENSG00000228253	5910
655.760891522881	7.5	0.0	0.13333333333333333	0.0	14	1	NAGK	protein_coding	0	false	1.11623840976949	ENSG00000124357	55577	13.0	1	0.035547681760468	0	false	0	ENSG00000124357	0
303.367412418812	2.0	0.0	0.5	0.0	3	1	ZBP1	protein_coding	0	false	1.67176486026853	ENSG00000124256	81030	15.0	1	0.0395539526945002	0	false	0	ENSG00000124256	0
37.4396471113716	1.5	0.005822356574152386	0.6666666666666666	0.0	2	9	TARBP2	protein_coding	8	false	0.0832749245930529	ENSG00000139546	6895	2.888888888888889	1	0.945409876677385	0	false	0	ENSG00000139546	34338
224.430921856233	2.0	0.0	0.5	0.0	3	1	PPP4R1L	transcribed_unprocessed_pseudogene	0	false	1.57906435120372	ENSG00000124224		9.0	1	0.00216936344010305	0	false	0	ENSG00000124224	0
521.184583259388	2.0	0.0	0.5	0.0	3	1	CSE1L	protein_coding	0	false	-1.12947786589238	ENSG00000124207	1434	293.0	1	0.0144118181493009	0	false	0	ENSG00000124207	0
160.683302181986	4.0	0.007839613728403971	0.25	0.0	7	5	GPAA1	protein_coding	4	false	0.271171798001132	ENSG00000197858	8733	1.4	1	0.684450357496176	0	false	0	ENSG00000197858	46235
543.174929896493	4.5	0.0	0.2222222222222222	0.0	8	1	VAPB	protein_coding	0	false	-1.37690932487704	ENSG00000124164	9217	5.0	1	0.0168091227065484	0	false	0	ENSG00000124164	0
5366.03387898988	2.0	0.0	0.5	0.0	3	1	PREX1	protein_coding	0	false	1.16285687699091	ENSG00000124126	57580	293.0	1	0.0235680234161749	0	false	0	ENSG00000124126	0
6.75587721224232	9.0	0.002868110007915068	0.1111111111111111	0.0	17	2	NBL1	protein_coding	1	false	-0.223362656469717	ENSG00000158747		1.5	1	0.941519702047762	0	false	0	ENSG00000158747	16915
143.874481453297	9.5	0.0	0.10526315789473684	0.0	18	1	SLPI	protein_coding	0	false	2.7266981283509	ENSG00000124107	6590	2.0	1	0.0166350323788009	0	false	0	ENSG00000124107	0
26.2709793917177	31.0	0.0	0.03225806451612903	0.0	61	1	SNX21	protein_coding	0	false	1.52932311197359	ENSG00000124104	90203	5.0	1	0.0443829100690849	0	false	0	ENSG00000124104	0
533.991803697469	2.5	0.0	0.4	0.0	4	1	MXD4	protein_coding	0	false	-1.65919948344404	ENSG00000123933	10608	3.0	1	0.0107931884640384	0	false	0	ENSG00000123933	0
552.991115879806	2.0	0.0	0.5	0.0	3	1	PFKFB2	protein_coding	0	false	2.75061421305098	ENSG00000123836	5208	293.0	1	0.00190639276905764	0	false	0	ENSG00000123836	0
89.4082522340939	13.5	0.0017942855515079663	0.07407407407407407	0.0	26	2	UCK1	protein_coding	1	false	0.4885580544549	ENSG00000130717	83549	2.0	1	0.511277286989943	0	false	0	ENSG00000130717	10582
228.62394796413	8.5	0.0026831198797072444	0.11764705882352941	0.0	16	2	RNPEP	protein_coding	1	false	0.356522463273584	ENSG00000176393	6051	1.5	1	0.487817860280738	0	false	0	ENSG00000176393	15824
853.516493701217	9.0	0.0	0.1111111111111111	0.0	17	1	KCNJ2	protein_coding	0	false	2.17188059458719	ENSG00000123700	3759	2.0	1	0.0158043641200381	0	false	0	ENSG00000123700	0
194.777828264727	31.0	0.0	0.03225806451612903	0.0	61	1	TNFAIP6	protein_coding	0	false	2.0956480007402	ENSG00000123610	7130	4.0	1	0.0327402379900947	0	false	0	ENSG00000123610	0
188.994130828469	2.0	0.0	0.5	0.0	3	1	USP45	protein_coding	0	false	-1.37522350963398	ENSG00000123552	85015	11.0	1	0.0198026108405936	0	false	0	ENSG00000123552	0
516.238656693048	22.5	0.02951431867677969	0.044444444444444446	0.0	44	3	SEC24C	protein_coding	2	false	0.374014907345851	ENSG00000176986	9632	2.3333333333333335	1	0.0355008600653873	0	false	0	ENSG00000176986	174064
1584.7894323205	23.0	0.0	0.043478260869565216	0.0	45	1	STIL	protein_coding	0	false	-2.00372411309709	ENSG00000123473	6491	3.0	1	0.0197698320098458	0	false	0	ENSG00000123473	0
1692.59922029784	2.0	0.0	0.5	0.0	3	1	PFDN5	protein_coding	0	false	-1.24981002574802	ENSG00000123349	5204	293.0	1	0.00424034167093145	0	false	0	ENSG00000123349	0
78.7588123150002	17.0	0.0584000778620228	0.058823529411764705	0.0	33	5	VPS72	protein_coding	4	false	0.0180055856296789	ENSG00000163159	6944	2.0	1	0.98647809077004	0	false	0	ENSG00000163159	344421
494.284895238808	17.5	0.0	0.05714285714285714	0.0	34	1	CENPK	protein_coding	0	false	-2.51199929053216	ENSG00000123219	64105	5.0	1	6.80169243992204E-4	0	false	0	ENSG00000123219	0
2751.72053731073	2.0	0.0	0.5	0.0	3	1	ADGRE5	protein_coding	0	false	1.01828925142536	ENSG00000123146	976	293.0	1	0.0235670633489271	0	false	0	ENSG00000123146	0
918.150188021125	10.5	0.06202171319510338	0.09523809523809523	0.0	20	3	AP1G1	protein_coding	2	false	0.479738483513245	ENSG00000166747	164	2.0	1	0.0274520753619265	0	false	0	ENSG00000166747	365780
715.400889830625	11.0	0.0	0.09090909090909091	0.0	21	1	CCDC91	protein_coding	0	false	-1.5111725412353	ENSG00000123106	55297	3.0	1	0.00583332154767504	0	false	0	ENSG00000123106	0
8434.14835307874	9.5	0.0	0.10526315789473684	0.0	18	1	SRGN	protein_coding	0	false	1.32026580405755	ENSG00000122862	5552	2.0	1	0.031460230297826	0	false	0	ENSG00000122862	0
159.86187915592	2.0	0.0	0.5	0.0	3	1	CALD1	protein_coding	0	false	1.92124758764602	ENSG00000122786	800	293.0	1	0.036252826524113	0	false	0	ENSG00000122786	0
339.094388341752	3.5	0.0	0.2857142857142857	0.0	6	1	TRIM24	protein_coding	0	false	-1.0317907009971	ENSG00000122779	8805	5.0	1	0.0355548586489307	0	false	0	ENSG00000122779	0
206.533839947636	13.5	0.20369329145423606	0.07407407407407407	0.0	26	2	NKIRAS2	protein_coding	1	false	-0.324659347870918	ENSG00000168256	28511	2.5	1	0.541168324364729	0	false	0	ENSG00000168256	1201304
432.886358633056	14.0	0.2070685558832965	0.07142857142857142	0.0	27	3	DCAF10	protein_coding	2	false	-0.551228641252182	ENSG00000122741	79269	2.3333333333333335	1	0.386711020667319	0	false	0	ENSG00000122741	1221210
914.159470417083	16.5	0.008090054076124372	0.06060606060606061	0.0	32	2	CCDC69	protein_coding	1	false	0.259866974195517	ENSG00000198624	26112	2.0	1	0.596055972849873	0	false	0	ENSG00000198624	47712
134.896356521393	28.0	0.0	0.03571428571428571	0.0	55	1	SLC25A51	protein_coding	0	false	-1.14951742605632	ENSG00000122696	92014	14.0	1	0.0269031794723291	0	false	0	ENSG00000122696	0
842.77592093135	4.0	0.0	0.25	0.0	7	1	GLIPR2	protein_coding	0	false	1.15931853558782	ENSG00000122694	152007	2.0	1	0.0168166056378494	0	false	0	ENSG00000122694	0
32.1342926722579	8.0	0.0	0.1250	0.0	15	1	FKBP9	protein_coding	0	false	1.76260906656967	ENSG00000122642	11328	3.0	1	0.0135951786325643	0	false	0	ENSG00000122642	0
2280.81458519835	1.5	8.149061009778195E-4	0.6666666666666666	0.0	2	2	HNRNPA2B1	protein_coding	1	false	-0.385017889881308	ENSG00000122566	3181	3.0	1	0.191543971361111	0	false	0	ENSG00000122566	4806
133.281887123203	5.0	0.004144728408718648	0.2	0.0	9	2	SLC35A4	protein_coding	1	false	-0.133814581648813	ENSG00000176087	113829	4.5	1	0.816030320215474	0	false	0	ENSG00000176087	24444
453.14585250984	5.5	0.002965607096567221	0.18181818181818182	0.0	10	2	HERPUD2	protein_coding	1	false	-0.460909211865793	ENSG00000122557	64224	1.5	1	0.218125046945118	0	false	0	ENSG00000122557	17490
71.4571031206359	3.0	0.14310453112208807	0.3333333333333333	0.0	5	3	MSRB3	protein_coding	2	false	0.966673647825742	ENSG00000174099	253827	3.0	1	0.129574605009502	0	false	0	ENSG00000174099	843975
134.898752553877	3.5	0.0019543503370516744	0.2857142857142857	0.0	6	2	KLHL7	protein_coding	1	false	-0.34180406931559	ENSG00000122550	55975	2.0	1	0.373595482031682	0	false	0	ENSG00000122550	11526
727.063125582798	7.5	0.0	0.13333333333333333	0.0	14	1	CCDC18	protein_coding	0	false	-1.96394761808294	ENSG00000122483	343099	13.0	1	0.0022596291217227	0	false	0	ENSG00000122483	0
501.977049755533	6.5	0.0019574024198268725	0.15384615384615385	0.0	12	2	NDFIP1	protein_coding	1	false	-0.132231330862835	ENSG00000131507	80762	2.5	1	0.771021532796465	0	false	0	ENSG00000131507	11544
24.6248793254043	7.0	0.0	0.14285714285714285	0.0	13	1	PTGFR	protein_coding	0	false	3.7040746486738	ENSG00000122420	5737	2.0	1	0.0199329752981146	0	false	0	ENSG00000122420	0
2158.89900418736	2.5	0.0	0.4	0.0	4	1	RPL5	protein_coding	0	false	-1.16094587666471	ENSG00000122406	6125	11.0	1	0.00660749655297588	0	false	0	ENSG00000122406	0
129.818432645135	18.5	0.00585389476282943	0.05405405405405406	0.0	36	2	SH2D1A	protein_coding	1	false	-0.839476375120895	ENSG00000183918	4068	4.5	1	0.196662609180774	0	false	0	ENSG00000183918	34524
168.762894885582	19.0	0.0	0.05263157894736842	0.0	37	1	LY9	protein_coding	0	false	-1.00361952389761	ENSG00000122224	4063	2.0	1	0.0279260048557047	0	false	0	ENSG00000122224	0
358.951929373722	2.0	0.018486974049835764	0.5	0.0	3	4	FYTTD1	protein_coding	3	false	-0.153495662494853	ENSG00000122068	84248	7.75	1	0.734764467455819	0	false	0	ENSG00000122068	109029
470.345350901537	28.0	0.3982679769371061	0.03571428571428571	0.0	55	4	EID1	protein_coding	3	false	-0.40939056256417	ENSG00000255302	23741	2.5	1	0.501400774931988	0	false	0	ENSG00000255302	2348830
3293.90145317755	28.5	0.0	0.03508771929824561	0.0	56	1	RPL21	protein_coding	0	false	-1.87559338510746	ENSG00000122026	6144	4.0	1	9.24296836251875E-5	0	false	0	ENSG00000122026	0
340.536688628699	12.0	0.13645302539400694	0.08333333333333333	0.0	23	2	REV1	protein_coding	1	false	-0.720171678465341	ENSG00000135945	51455	3.0	1	0.0798995877738082	0	false	0	ENSG00000135945	804747
277.857221775458	12.5	0.13850351633847735	0.08	0.0	24	3	POLK	protein_coding	2	false	-0.430455963282833	ENSG00000122008	51426	1.6666666666666667	1	0.219972544714613	0	false	0	ENSG00000122008	816840
417.337579527389	2.0	0.0012238851928543283	0.5	0.0	3	2	KHDRBS1	protein_coding	1	false	-0.267235431383325	ENSG00000121774	10657	147.0	1	0.391145598389604	0	false	0	ENSG00000121774	7218
156.929655455718	7.5	0.1397575832387753	0.13333333333333333	0.0	14	2	DESI2	protein_coding	1	false	-0.00393469249469777	ENSG00000121644	51029	2.5	1	0.996518358689906	0	false	0	ENSG00000121644	824236
181.786270125052	2.0	0.0	0.5	0.0	3	1	KIF18A	protein_coding	0	false	-1.63535288971164	ENSG00000121621	81930	293.0	1	0.0317490501252838	0	false	0	ENSG00000121621	0
49.8504464876032	12.0	0.026460709860194262	0.08333333333333333	0.0	23	4	LSM2	protein_coding	3	false	0.121908313381875	ENSG00000204392	57819	2.5	1	0.916486612357111	0	false	0	ENSG00000204392	156055
24.5116114918519	12.5	1.2007748220805303	0.08	0.0	24	5	PMVK	protein_coding	4	false	-0.0701160294734385	ENSG00000163344	10654	2.2	1	0.962726313556602	0	false	0	ENSG00000163344	7081704
1493.26611359337	13.0	0.0	0.07692307692307693	0.0	25	1	PLBD1	protein_coding	0	false	1.61580058087542	ENSG00000121316	79887	5.0	1	0.0395539526945002	0	false	0	ENSG00000121316	0
277.675316858468	14.5	0.6366454761689986	0.06896551724137931	0.0	28	4	TWF2	protein_coding	3	false	0.424562833426183	ENSG00000247596	11344	3.0	1	0.441058041814529	0	false	0	ENSG00000247596	3754688
461.189822837206	15.0	0.09356041055261011	0.06666666666666667	0.0	29	3	SCPEP1	protein_coding	2	false	0.675099204555477	ENSG00000121064	59342	4.0	1	0.253081903175408	0	false	0	ENSG00000121064	551783
2034.88206282555	3.5	0.0058722072594806175	0.2857142857142857	0.0	6	4	TRIM25	protein_coding	3	false	1.78790559038571	ENSG00000121060	7706	4.75	1	3.88126544195509E-5	0	false	0	ENSG00000121060	34632
31.5698897709624	8.5	0.0	0.11764705882352941	0.0	16	1	EPHX2	protein_coding	0	false	-1.32144456871138	ENSG00000120915	2053	5.0	1	0.021336538559062	0	false	0	ENSG00000120915	0
263.918430646676	10.5	0.0045204737103763356	0.09523809523809523	0.0	20	2	TNFRSF10B	protein_coding	1	false	0.231852506537938	ENSG00000120889	8795	2.5	1	0.674705241142327	0	false	0	ENSG00000120889	26660
2129.12393018328	2.0	0.0	0.5	0.0	3	1	CLU	protein_coding	0	false	1.30539549342423	ENSG00000120885	1191	293.0	1	0.0395539526945002	0	false	0	ENSG00000120885	0
1186.72782817462	14.0	0.0	0.07142857142857142	0.0	27	1	APAF1	protein_coding	0	false	1.20899919030359	ENSG00000120868	317	3.0	1	0.0160824840337344	0	false	0	ENSG00000120868	0
128.806707700782	6.0	0.010864566878933373	0.16666666666666666	0.0	11	2	NFYB	protein_coding	1	false	-0.665327070065673	ENSG00000120837	4801	2.0	1	0.267072283251685	0	false	0	ENSG00000120837	64075
90.310035067774	12.0	0.015650232670443565	0.08333333333333333	0.0	23	2	NR2C1	protein_coding	1	false	-0.618989852769731	ENSG00000120798	7181	2.5	1	0.242497191277651	0	false	0	ENSG00000120798	92299
28.9999585633122	6.0	0.015980705410935818	0.16666666666666666	0.0	11	4	TMEM79	protein_coding	3	false	0.814517267958007	ENSG00000163472	84283	2.25	1	0.331026770072212	0	false	0	ENSG00000163472	94248
1087.43113292518	6.5	0.003994158991808889	0.15384615384615385	0.0	12	2	SERP1	protein_coding	1	false	0.21180640822282	ENSG00000120742	27230	2.5	1	0.682801513036259	0	false	0	ENSG00000120742	23556
696.214111790671	11.5	0.0	0.08695652173913043	0.0	22	1	FAM53C	protein_coding	0	false	1.04023559785236	ENSG00000120709		4.0	1	0.0311875169906339	0	false	0	ENSG00000120709	0
273.050466174345	1.5	0.0	0.6666666666666666	0.0	2	1	MTRF1	protein_coding	0	false	-1.73656529345747	ENSG00000120662	9617	10.0	1	0.00457453371171203	0	false	0	ENSG00000120662	0
98.9625059722515	7.5	0.0	0.13333333333333333	0.0	14	1	CCDC77	protein_coding	0	false	-1.24825502172116	ENSG00000120647	84318	13.0	1	0.0352238944241422	0	false	0	ENSG00000120647	0
353.273113107143	5.5	0.009381763330649762	0.18181818181818182	0.0	10	2	TSPAN33	protein_coding	1	false	0.678878787286734	ENSG00000158457	340348	2.0	1	0.373884774933815	0	false	0	ENSG00000158457	55330
30.9099593460196	6.0	0.008581608963085399	0.16666666666666666	0.0	11	2	PDZD11	protein_coding	1	false	-0.258468234782207	ENSG00000120509	51248	2.5	1	0.79323865245945	0	false	0	ENSG00000120509	50611
181.943948685269	4.0	0.0	0.25	0.0	7	1	CD274	protein_coding	0	false	2.30506991940322	ENSG00000120217	29126	4.0	1	0.0208589260867621	0	false	0	ENSG00000120217	0
1861.93107941515	5.0	0.0036075618402838304	0.2	0.0	9	2	GNA13	protein_coding	1	false	0.530493231302139	ENSG00000120063	10672	4.0	1	0.228210182999038	0	false	0	ENSG00000120063	21276
8.5870062950501	4.5	0.004294619585011697	0.2222222222222222	0.0	8	2	NME2	protein_coding	1	false	-1.31440007862543	ENSG00000243678	4831	4.5	1	0.282100666934588	0	false	0	ENSG00000243678	25328
34.7285545499233	5.0	0.003415280625446367	0.2	0.0	9	2	GOT1	protein_coding	1	false	-0.138170352553352	ENSG00000120053	2805	1.5	1	0.91198752100881	0	false	0	ENSG00000120053	20142
11.0209953113613	2.0	0.016069724491879087	0.5	0.0	3	2	TMED2-DT	lncRNA	1	false	0.372993315966357	ENSG00000247373		20.0	1	0.775174399668789	0	false	0	ENSG00000247373	94773
43.9532082525833	4.5	0.013864594686798657	0.2222222222222222	0.0	8	4	LIN52	protein_coding	3	false	-0.483530094956293	ENSG00000205659	91750	2.25	1	0.54411459470166	0	false	0	ENSG00000205659	81768
176.620879161341	5.0	0.005109186565681161	0.2	0.0	9	3	BCL11A	protein_coding	2	false	-0.109069675407045	ENSG00000119866	53335	2.0	1	0.915184784316525	0	false	0	ENSG00000119866	30132
386.807938521712	12.0	0.0	0.08333333333333333	0.0	23	1	LGALSL	protein_coding	0	false	1.48289117897431	ENSG00000119862	29094	2.0	1	0.00258763821028144	0	false	0	ENSG00000119862	0
17.1357785348272	6.5	0.005333005969195668	0.15384615384615385	0.0	12	2	CDC42BPG	protein_coding	1	false	0.00153119563870607	ENSG00000171219	55561	6.0	1	0.998821881951463	0	false	0	ENSG00000171219	31452
492.875614929571	7.0	0.00374507512532191	0.14285714285714285	0.0	13	2	RHOQ	protein_coding	1	false	0.636706287352553	ENSG00000119729	23433	1.5	1	0.245939585181455	0	false	0	ENSG00000119729	22087
27.4637359190141	4.5	0.01771157546478134	0.2222222222222222	0.0	8	6	ZBTB9	protein_coding	5	false	0.00237638893100497	ENSG00000213588	221504	2.1666666666666665	1	0.9986373962671	0	false	0	ENSG00000213588	104456
90.681526477583	5.0	0.0	0.2	0.0	9	1	LTBP2	protein_coding	0	false	-2.22721266244492	ENSG00000119681	4053	6.0	1	0.0198046764254853	0	false	0	ENSG00000119681	0
158.018872876885	11.5	0.0034468188141234114	0.08695652173913043	0.0	22	2	FCF1	protein_coding	1	false	-0.484097194595771	ENSG00000119616	51077	2.5	1	0.158488926227543	0	false	0	ENSG00000119616	20328
8506.35630232215	34.5	0.0	0.028985507246376812	0.0	68	1	CSF3R	protein_coding	0	false	1.61656528997547	ENSG00000119535	1441	3.0	1	0.00552952371290366	0	false	0	ENSG00000119535	0
40.5800760197025	13.0	0.13282918577892205	0.07692307692307693	0.0	25	2	DTD1	protein_coding	1	false	-0.18423080458877	ENSG00000125821	92675	2.5	1	0.805580304586377	0	false	0	ENSG00000125821	783375
963.702533167633	1.0	1.5514754107255615E-4	1.0	0.0	1	2	STAU1	protein_coding	1	false	-0.395858995728688	ENSG00000124214	6780	16.0	1	0.649204205470104	0	false	0	ENSG00000124214	915
249.818227377284	1.5	0.0	0.6666666666666666	0.0	2	1	TRPM6	protein_coding	0	false	2.06775571266382	ENSG00000119121	140803	2.0	1	0.0185685139278219	0	false	0	ENSG00000119121	0
439.812897045127	2.0	0.0	0.5	0.0	3	1	KLF12	protein_coding	0	false	-1.03637824455039	ENSG00000118922	11278	293.0	1	0.031460230297826	0	false	0	ENSG00000118922	0
1108.33150181135	2.0	0.0	0.5	0.0	3	1	UBN1	protein_coding	0	false	1.49972663511293	ENSG00000118900	29855	293.0	1	0.00527523785925104	0	false	0	ENSG00000118900	0
3182.61723380622	4.0	0.0	0.25	0.0	7	1	FBXL5	protein_coding	0	false	1.18165461971519	ENSG00000118564	26234	20.0	1	0.033941983303739	0	false	0	ENSG00000118564	0
12.0943919342752	3.5	9.257984418100072E-4	0.2857142857142857	0.0	6	2	FABP5	protein_coding	1	false	0.171086044495988	ENSG00000164687	2171	2.5	1	0.934552867135257	0	false	0	ENSG00000164687	5460
409.848982542456	4.0	0.0	0.25	0.0	7	1	ARG1	protein_coding	0	false	2.8282352906826	ENSG00000118520	383	2.0	1	0.0065437783879744	0	false	0	ENSG00000118520	0
90.7543175921959	12.5	0.0036950548798395013	0.08	0.0	24	2	SNRPG	protein_coding	1	false	-0.0877655238778925	ENSG00000143977	6637	2.5	1	0.901767219301066	0	false	0	ENSG00000143977	21792
842.761784580286	13.0	0.0	0.07692307692307693	0.0	25	1	AKAP7	protein_coding	0	false	-2.44059026812495	ENSG00000118507	9465	2.0	1	0.00344916445636086	0	false	0	ENSG00000118507	0
12.4488782919417	5.0	0.0013825934971646151	0.2	0.0	9	2	CLDND2	protein_coding	1	false	0.600949938632812	ENSG00000160318	125875	4.0	1	0.731818327478342	0	false	0	ENSG00000160318	8154
415.983861096192	5.5	0.0	0.18181818181818182	0.0	10	1	ANKRD13C	protein_coding	0	false	-1.57341828003479	ENSG00000118454	81573	2.0	1	0.00583332154767504	0	false	0	ENSG00000118454	0
216.031706495643	20.0	1.492175477125318	0.05	0.0	39	6	TM2D3	protein_coding	5	false	0.188277131493102	ENSG00000184277	80213	3.8333333333333335	1	0.698045625277645	0	false	0	ENSG00000184277	8800272
1858.06534636058	2.0	0.002191904113054572	0.5	0.0	3	4	HNRNPH1	protein_coding	3	false	-0.16964931030924	ENSG00000169045	3187	74.0	1	0.733587156648947	0	false	0	ENSG00000169045	12927
623.817470274107	2.5	0.0	0.4	0.0	4	1	KLF7	protein_coding	0	false	1.287272144086	ENSG00000118263	8609	4.0	1	0.00320478198536384	0	false	0	ENSG00000118263	0
158.980848787913	1.5	8.169408228279514E-4	0.6666666666666666	0.0	2	2	DDX59	protein_coding	1	false	0.158330474263791	ENSG00000118197	83479	4.0	1	0.771339311485359	0	false	0	ENSG00000118197	4818
489.974275015903	2.0	0.0	0.5	0.0	3	1	KIF14	protein_coding	0	false	-1.90200827150641	ENSG00000118193	9928	293.0	1	0.0202462130178963	0	false	0	ENSG00000118193	0
83.8101213776133	2.0	0.022376344866362863	0.5	0.0	3	4	TSPYL2	protein_coding	3	false	0.166628204573072	ENSG00000184205	64061	7.25	1	0.908156661779891	0	false	0	ENSG00000184205	131967
1479.19711069581	2.5	0.0	0.4	0.0	4	1	RPS25	protein_coding	0	false	-1.29347360424996	ENSG00000118181	6230	4.0	1	3.36227149488811E-6	0	false	0	ENSG00000118181	0
16.0321657428576	3.0	0.0145533480330683	0.3333333333333333	0.0	5	3	KPTN	protein_coding	2	false	0.484173669476662	ENSG00000118162	11133	2.0	1	0.687493420459431	0	false	0	ENSG00000118162	85830
10543.9823051041	2.5	0.11719116143957928	0.4	0.0	4	4	PSAP	protein_coding	3	false	0.345951171959303	ENSG00000197746	5660	2.5	1	0.509747642848527	0	false	0	ENSG00000197746	691148
1013.16795095438	3.0	0.0	0.3333333333333333	0.0	5	1	CTSD	protein_coding	0	false	1.06865821630863	ENSG00000117984	1509	4.0	1	0.00527523785925104	0	false	0	ENSG00000117984	0
159.260898565462	2.0	9.517411453991888E-4	0.5	0.0	3	2	MESD	protein_coding	1	false	-0.256143068488214	ENSG00000117899	23184	5.0	1	0.478943545960176	0	false	0	ENSG00000117899	5613
946.791681952342	24.0	0.007116609230990442	0.041666666666666664	0.0	47	2	PPP3R1	protein_coding	1	false	-0.280741708206257	ENSG00000221823	5534	2.0	1	0.716682615392462	0	false	0	ENSG00000221823	41971
427.098215377002	24.5	0.0	0.04081632653061224	0.0	48	1	RCAN3	protein_coding	0	false	-1.36330422675199	ENSG00000117602	11123	2.0	1	0.0179947329834369	0	false	0	ENSG00000117602	0
4115.25191188182	2.0	0.0	0.5	0.0	3	1	PRDX6	protein_coding	0	false	-1.79536818185917	ENSG00000117592	9588	293.0	1	0.0278505752137462	0	false	0	ENSG00000117592	0
12.7738838151085	1.0	0.001351563988950104	1.0	0.0	1	2	AC020978.6	lncRNA	1	false	-0.224249528616647	ENSG00000262514		17.5	1	0.908031956760918	0	false	0	ENSG00000262514	7971
247.25527960805	1.5	0.0024013109034639784	0.6666666666666666	0.0	2	4	PTBP2	protein_coding	3	false	0.432269027253935	ENSG00000117569	58155	1.25	1	0.212540537178635	0	false	0	ENSG00000117569	14162
32.1814971530239	15.5	0.008001543675643635	0.06451612903225806	0.0	30	2	FASLG	protein_coding	1	false	0.18093164108838	ENSG00000117560	356	2.5	1	0.920276455340303	0	false	0	ENSG00000117560	47190
34.7335651634276	3.0	0.0035387204176877017	0.3333333333333333	0.0	5	2	CENPO	protein_coding	1	false	0.0905108807656653	ENSG00000138092	79172	3.0	1	0.952139257180665	0	false	0	ENSG00000138092	20870
53.5149204135388	3.5	0.0033440653606917514	0.2857142857142857	0.0	6	2	ERI3	protein_coding	1	false	-0.362170471883282	ENSG00000117419	79033	2.0	1	0.612558334564293	0	false	0	ENSG00000117419	19722
36.1627126491866	16.0	0.011553489785357193	0.0625	0.0	31	2	CR2	protein_coding	1	false	0.214945535749021	ENSG00000117322	1380	1.5	1	0.890721468842793	0	false	0	ENSG00000117322	68138
1428.8760351021	2.0	0.0	0.5	0.0	3	1	ECE1	protein_coding	0	false	1.49344051144353	ENSG00000117298	1889	293.0	1	1.31456801390404E-4	0	false	0	ENSG00000117298	0
1066.4970777846	13.0	0.0	0.07692307692307693	0.0	25	1	GBP1	protein_coding	0	false	1.89783708381231	ENSG00000117228	2633	10.0	1	0.0339705880527506	0	false	0	ENSG00000117228	0
528.582310156028	2.0	0.0010417775872675246	0.5	0.0	3	2	KDM5B	protein_coding	1	false	0.950525335585006	ENSG00000117139	10765	147.0	1	0.0160975894733668	0	false	0	ENSG00000117139	6144
454.564538255608	4.5	0.0011950599666441266	0.2222222222222222	0.0	8	2	MTMR14	protein_coding	1	false	0.34551134865616	ENSG00000163719	64419	2.0	1	0.325259631491433	0	false	0	ENSG00000163719	7048
1250.77438186556	5.0	0.0	0.2	0.0	9	1	PADI2	protein_coding	0	false	1.52279368241985	ENSG00000117115	11240	2.0	1	0.044876046421119	0	false	0	ENSG00000117115	0
744.474304469926	2.0	0.0	0.5	0.0	3	1	SIPA1L2	protein_coding	0	false	2.57093543295021	ENSG00000116991	57568	293.0	1	2.57515958056538E-4	0	false	0	ENSG00000116991	0
15.3613435274385	5.5	0.0	0.18181818181818182	0.0	10	1	HPCAL4	protein_coding	0	false	-1.72185014881842	ENSG00000116983	51440	2.0	1	0.0466222181389322	0	false	0	ENSG00000116983	0
116.517225324387	6.0	0.004810252013865952	0.16666666666666666	0.0	11	2	ZNF544	protein_coding	1	false	-0.0811658445581231	ENSG00000198131	27300	3.0	1	0.93670143300544	0	false	0	ENSG00000198131	28369
237.133171118002	6.5	0.0034630965889244666	0.15384615384615385	0.0	12	2	GNPAT	protein_coding	1	false	0.299499814014114	ENSG00000116906	8443	1.5	1	0.36478460269552	0	false	0	ENSG00000116906	20424
72.4304903591033	11.0	0.010906617797169432	0.09090909090909091	0.0	21	2	GPRASP1	protein_coding	1	false	-0.745824765477401	ENSG00000198932	9737	2.0	1	0.38483578015857	0	false	0	ENSG00000198932	64323
261.774829494344	2.5	0.0	0.4	0.0	4	1	PHTF1	protein_coding	0	false	1.38539194139315	ENSG00000116793	10745	2.0	1	0.0198709451471264	0	false	0	ENSG00000116793	0
78.2995127732673	9.5	0.0	0.10526315789473684	0.0	18	1	PLA2G4A	protein_coding	0	false	1.58123590536865	ENSG00000116711	5321	2.0	1	0.0465291187280026	0	false	0	ENSG00000116711	0
666.378518873519	1.0	0.0011889558010937309	1.0	0.0	1	2	DDX21	protein_coding	1	false	-0.659790269235162	ENSG00000165732	9188	17.0	1	0.0333641369593224	0	false	0	ENSG00000165732	7012
4461.37977549192	1.5	0.002082198693301628	0.6666666666666666	0.0	2	3	NCF2	protein_coding	2	false	1.18685694560443	ENSG00000116701	4688	2.0	1	0.0396868765240039	0	false	0	ENSG00000116701	12280
1680.44218862775	2.0	0.0	0.5	0.0	3	1	DNAJC6	protein_coding	0	false	-1.92447283542404	ENSG00000116675	9829	293.0	1	0.022388831945396	0	false	0	ENSG00000116675	0
192.3008458254	2.0	0.0019930100522041806	0.5	0.0	3	4	DDX39A	protein_coding	3	false	-0.144307932604189	ENSG00000123136	10212	74.0	1	0.807758297454262	0	false	0	ENSG00000123136	11754
2396.44608100002	2.5	0.0	0.4	0.0	4	1	SWT1	protein_coding	0	false	-2.49387511522717	ENSG00000116668	54823	4.0	1	6.75890478392132E-4	0	false	0	ENSG00000116668	0
1168.48063530586	2.0	0.004707329000280113	0.5	0.0	3	5	SFPQ	protein_coding	4	false	-0.270070484120453	ENSG00000116560	6421	59.4	1	0.467603737439557	0	false	0	ENSG00000116560	27762
78.499305911319	3.5	0.0029238952986395173	0.2857142857142857	0.0	6	2	PCED1A	protein_coding	1	false	-0.226298671284984	ENSG00000132635	64773	2.0	1	0.75781646107648	0	false	0	ENSG00000132635	17244
237.558915126167	4.0	0.0023833375271211468	0.25	0.0	7	2	S100PBP	protein_coding	1	false	0.38391705871016	ENSG00000116497	64766	1.5	1	0.361948249064741	0	false	0	ENSG00000116497	14056
254.273409351813	14.0	0.0	0.07142857142857142	0.0	27	1	ELAPOR1	protein_coding	0	false	1.87668419251894	ENSG00000116299	57535	6.0	1	0.0258596915758969	0	false	0	ENSG00000116299	0
378.748504030687	2.0	0.0	0.5	0.0	3	1	QSOX1	protein_coding	0	false	1.14019693960157	ENSG00000116260	5768	13.0	1	5.15533038133616E-4	0	false	0	ENSG00000116260	0
252.08855523783	2.0	0.0	0.5	0.0	3	1	RPL22	protein_coding	0	false	-1.20334509571086	ENSG00000116251	6146	293.0	1	4.95354088614978E-4	0	false	0	ENSG00000116251	0
52.0728699016325	9.5	0.1617420745888336	0.10526315789473684	0.0	18	3	DUSP28	protein_coding	2	false	0.110668884885521	ENSG00000188542	285193	2.3333333333333335	1	0.911210322072536	0	false	0	ENSG00000188542	953892
109.299703356322	2.0	0.0	0.5	0.0	3	1	EPAS1	protein_coding	0	false	3.53181552854564	ENSG00000116016	2034	293.0	1	2.74328447612997E-4	0	false	0	ENSG00000116016	0
27.4567926364413	17.0	0.018375573028541044	0.058823529411764705	0.0	33	2	DYNC2LI1	protein_coding	1	false	-1.29204110132983	ENSG00000138036	51626	2.5	1	0.123168827404787	0	false	0	ENSG00000138036	108372
105.330817249202	17.5	0.01398023471194782	0.05714285714285714	0.0	34	2	PCYOX1	protein_coding	1	false	-0.289036314125975	ENSG00000116005	51449	1.5	1	0.686519311116816	0	false	0	ENSG00000116005	82450
615.49506390711	1.5	0.001599630494512016	0.6666666666666666	0.0	2	3	TIA1	protein_coding	2	false	0.23369959619213	ENSG00000116001	7072	4.0	1	0.321935762245993	0	false	0	ENSG00000116001	9434
2629.09585170911	2.0	0.0	0.5	0.0	3	1	TRAK2	protein_coding	0	false	-1.60953172037247	ENSG00000115993	66008	293.0	1	0.0287153277365042	0	false	0	ENSG00000115993	0
2070.5006694945	14.0	0.003914296159191212	0.07142857142857142	0.0	27	2	SARAF	protein_coding	1	false	-0.295744931169765	ENSG00000133872	51669	3.5	1	0.509448216720112	0	false	0	ENSG00000133872	23085
2491.82798883357	14.5	0.0	0.06896551724137931	0.0	28	1	PLEK	protein_coding	0	false	1.05787903981448	ENSG00000115956	5341	2.0	1	0.0165309275810828	0	false	0	ENSG00000115956	0
23.6432950430871	6.5	0.00708490148215922	0.15384615384615385	0.0	12	3	NAT8B	polymorphic_pseudogene	2	false	0.312312258432827	ENSG00000204872	51471	2.0	1	0.816376451326333	0	false	0	ENSG00000204872	41784
99.1068557764024	6.0	0.0030439438877972987	0.16666666666666666	0.0	11	2	NFATC1	protein_coding	1	false	0.0861415067755385	ENSG00000131196	4772	2.0	1	0.924546668052758	0	false	0	ENSG00000131196	17952
245.90447733989	14.5	0.0	0.06896551724137931	0.0	28	1	DCAF17	protein_coding	0	false	-1.53601541179777	ENSG00000115827	80067	2.0	1	0.00214038167462747	0	false	0	ENSG00000115827	0
139.193624062016	1.0	0.0066445537617598445	1.0	0.0	1	3	NOL6	protein_coding	2	false	-0.335391030268326	ENSG00000165271	65083	15.666666666666666	1	0.70037026781238	0	false	0	ENSG00000165271	39187
175.942897952334	1.5	0.0	0.6666666666666666	0.0	2	1	NOL10	protein_coding	0	false	-1.38482415092887	ENSG00000115761	79954	3.0	1	0.00424906729433034	0	false	0	ENSG00000115761	0
2089.51900127638	4.0	0.0	0.25	0.0	7	1	ODC1	protein_coding	0	false	-1.61627897574965	ENSG00000115758	4953	20.0	1	0.0187178867849262	0	false	0	ENSG00000115758	0
17.0476843160241	2.0	0.0	0.5	0.0	3	1	ABCB6	protein_coding	0	false	2.67105352229794	ENSG00000115657	10058	293.0	1	0.0376368786831735	0	false	0	ENSG00000115657	0
82.1960836789958	2.0	4.3034367130289345E-4	0.5	0.0	3	2	PIGA	protein_coding	1	false	-0.22760215583566	ENSG00000165195	5277	3.0	1	0.721870409190517	0	false	0	ENSG00000165195	2538
1150.30226052107	2.5	0.0	0.4	0.0	4	1	IL18RAP	protein_coding	0	false	2.27756603890441	ENSG00000115607	8807	2.0	1	0.00705314577595528	0	false	0	ENSG00000115607	0
1058.31294316815	2.5	0.0	0.4	0.0	4	1	IL18R1	protein_coding	0	false	3.53549952777413	ENSG00000115604	8809	2.0	1	2.91447746220906E-4	0	false	0	ENSG00000115604	0
62.542848200016	6.0	0.0015723313096894134	0.16666666666666666	0.0	11	2	TSPAN18	protein_coding	1	false	0.194857712034207	ENSG00000157570	90139	2.0	1	0.840490610349913	0	false	0	ENSG00000157570	9273
99.5141263416809	6.5	0.0	0.15384615384615385	0.0	12	1	IL1RL1	protein_coding	0	false	3.62028930376824	ENSG00000115602	9173	2.0	1	0.00335144106063844	0	false	0	ENSG00000115602	0
418.978613404244	14.0	0.0	0.07142857142857142	0.0	27	1	IL1R1	protein_coding	0	false	3.05874435578261	ENSG00000115594	3554	2.0	1	2.50289790669924E-5	0	false	0	ENSG00000115594	0
2364.20895607466	14.0	0.0	0.07142857142857142	0.0	27	1	IL1R2	protein_coding	0	false	3.84592031803745	ENSG00000115590	7850	3.0	1	0.00202017704426238	0	false	0	ENSG00000115590	0
90.6169140040032	24.0	0.9484615128970845	0.041666666666666664	0.0	47	3	CHIC1	protein_coding	2	false	-0.757727489492365	ENSG00000204116	53344	2.6666666666666665	1	0.171318520341553	0	false	0	ENSG00000204116	5593658
109.109362393434	24.5	0.017189330189914157	0.04081632653061224	0.0	48	2	TXNDC9	protein_coding	1	false	0.0544011703204999	ENSG00000115514	10190	2.0	1	0.951531105368668	0	false	0	ENSG00000115514	101376
167.381372371844	5.0	0.0	0.2	0.0	9	1	EHBP1	protein_coding	0	false	-1.10977382791935	ENSG00000115504	23301	8.0	1	0.0258596915758969	0	false	0	ENSG00000115504	0
42.4734075076256	1.0	3.8947967414607813E-4	1.0	0.0	1	2	FN1	protein_coding	1	false	0.573137250236386	ENSG00000115414	2335	16.0	1	0.760135744889041	0	false	0	ENSG00000115414	2297
324.546703393252	31.0	0.0	0.03225806451612903	0.0	61	1	FANCL	protein_coding	0	false	-1.51747685096284	ENSG00000115392	55120	5.0	1	0.0365436110700062	0	false	0	ENSG00000115392	0
282.496495043602	6.0	0.0015555448544258253	0.16666666666666666	0.0	11	2	MSI2	protein_coding	1	false	-0.391197771967336	ENSG00000153944	124540	1.5	1	0.435493819970881	0	false	0	ENSG00000153944	9174
88.0772624920843	6.5	0.0	0.15384615384615385	0.0	12	1	LOXL3	protein_coding	0	false	1.68647084964092	ENSG00000115318	84695	2.0	1	0.0244891234798127	0	false	0	ENSG00000115318	0
915.827549323566	2.0	4.298349908403605E-4	0.5	0.0	3	2	SPTBN1	protein_coding	1	false	-0.0163043671880975	ENSG00000115306	6711	147.0	1	0.977289070376175	0	false	0	ENSG00000115306	2535
427.36195670184	11.5	0.008322351487347762	0.08695652173913043	0.0	22	2	MAP7D1	protein_coding	1	false	0.275027704495321	ENSG00000116871	55700	2.0	1	0.564380437960568	0	false	0	ENSG00000116871	49082
249.498265050615	12.0	0.0054598369645205555	0.08333333333333333	0.0	23	2	CLIP4	protein_coding	1	false	-0.197767270866483	ENSG00000115295	79745	1.5	1	0.751391711738049	0	false	0	ENSG00000115295	32200
118.361717547803	10.0	0.0026707419884522752	0.1	0.0	19	2	ICMT	protein_coding	1	false	-0.275690630296919	ENSG00000116237	23463	2.0	1	0.756136502933695	0	false	0	ENSG00000116237	15751
3380.97268347715	10.5	0.0	0.09523809523809523	0.0	20	1	GCA	protein_coding	0	false	1.86534930028174	ENSG00000115271	25801	2.0	1	0.018975489571227	0	false	0	ENSG00000115271	0
86.1868326141177	13.0	0.6274573505344198	0.07692307692307693	0.0	25	4	H4C9	protein_coding	3	false	-0.452858175692692	ENSG00000276180	8294	4.5	1	0.605559428462241	0	false	0	ENSG00000276180	3700500
1671.32021068791	13.5	0.0	0.07407407407407407	0.0	26	1	RPS15	protein_coding	0	false	-1.43197729848785	ENSG00000115268	6209	4.0	1	4.39857931505994E-4	0	false	0	ENSG00000115268	0
401.128361867679	2.0	0.0	0.5	0.0	3	1	GPD2	protein_coding	0	false	1.39463334656653	ENSG00000115159	2820	293.0	1	0.00157102278005373	0	false	0	ENSG00000115159	0
451.718381755021	18.5	0.027169640864811048	0.05405405405405406	0.0	36	3	ZAP70	protein_coding	2	false	-0.725402116797035	ENSG00000115085	7535	3.3333333333333335	1	0.235079866090789	0	false	0	ENSG00000115085	160236
349.390177572335	3.0	0.0015870830431028696	0.3333333333333333	0.0	5	2	KANSL3	protein_coding	1	false	0.185217036777224	ENSG00000114982	55683	4.5	1	0.706112460230049	0	false	0	ENSG00000114982	9360
668.680151759681	10.0	0.013395591300343259	0.1	0.0	19	2	MOB1B	protein_coding	1	false	-0.0884863695927227	ENSG00000173542	92597	3.0	1	0.920196817294138	0	false	0	ENSG00000173542	79002
2493.31701290546	10.5	0.011313053486733275	0.09523809523809523	0.0	20	2	MOB1A	protein_coding	1	false	0.240385555368801	ENSG00000114978	55233	2.0	1	0.588982743232589	0	false	0	ENSG00000114978	66720
105.366470834597	5.0	0.0013413903796994444	0.2	0.0	9	2	DGUOK	protein_coding	1	false	-0.0893414782449749	ENSG00000114956	1716	1.5	1	0.855280028274743	0	false	0	ENSG00000114956	7911
65.6322930189101	2.5	0.0011245229425062213	0.4	0.0	4	2	ZBTB47	protein_coding	1	false	0.698751670823717	ENSG00000114853	92999	6.0	1	0.401618099194167	0	false	0	ENSG00000114853	6632
74.0146811655211	10.0	0.004929113681944489	0.1	0.0	19	2	VIPR1	protein_coding	1	false	-0.231416350787359	ENSG00000114812	7433	4.5	1	0.873801785810138	0	false	0	ENSG00000114812	29070
126.519629814556	28.0	0.0	0.03571428571428571	0.0	55	1	ABHD14B	protein_coding	0	false	-1.14359859130541	ENSG00000114779	84836	14.0	1	0.0027226361932879	0	false	0	ENSG00000114779	0
560.174313844481	6.0	0.06647622800550461	0.16666666666666666	0.0	11	3	MAPKAPK3	protein_coding	2	false	0.425632454599191	ENSG00000114738	7867	2.6666666666666665	1	0.356835754756598	0	false	0	ENSG00000114738	392051
7.47630068559458	33.5	0.037209975834286826	0.029850746268656716	0.0	66	2	ETV5	protein_coding	1	false	1.20818990378274	ENSG00000244405	2119	3.5	1	0.56985029052637	0	false	0	ENSG00000244405	219450
228.566204863265	34.0	0.02851493112805658	0.029411764705882353	0.0	67	3	CISH	protein_coding	2	false	0.526083051771921	ENSG00000114737	1154	1.3333333333333333	1	0.421769400102888	0	false	0	ENSG00000114737	168170
188.199827289633	2.0	4.135572160393054E-4	0.5	0.0	3	2	LDLR	protein_coding	1	false	0.657809950565007	ENSG00000130164	3949	147.0	1	0.334171147717186	0	false	0	ENSG00000130164	2439
71.851045061721	2.5	0.0	0.4	0.0	4	1	CFAP92	protein_coding	0	false	2.02174017552067	ENSG00000114656	57501	2.0	1	0.0318008970815074	0	false	0	ENSG00000114656	0
22.6736534471992	1.0	0.003299471040143028	1.0	0.0	1	7	AC139530.1	lncRNA	6	false	-0.72699950185108	ENSG00000262049		6.0	1	0.461209034928866	0	false	0	ENSG00000262049	19459
165.350296543388	1.5	0.0015942045695783312	0.6666666666666666	0.0	2	3	NCBP2	protein_coding	2	false	-0.386922656440242	ENSG00000114503	22916	3.0	1	0.397490558344959	0	false	0	ENSG00000114503	9402
627.091957497928	4.0	0.008359485161112668	0.25	0.0	7	4	FXR1	protein_coding	3	false	-0.3193229160232	ENSG00000114416	8087	5.75	1	0.416400182339546	0	false	0	ENSG00000114416	49301
957.3213949012	2.0	0.0	0.5	0.0	3	1	RPL24	protein_coding	0	false	-1.07438705533999	ENSG00000114391	6152	293.0	1	0.00375682096525693	0	false	0	ENSG00000114391	0
7.70620813156111	16.0	0.004241886377062445	0.0625	0.0	31	2	LAMB3	protein_coding	1	false	0.187679629176504	ENSG00000196878	3914	4.0	1	0.947745826819558	0	false	0	ENSG00000196878	25017
28.4416184462805	16.5	0.0	0.06060606060606061	0.0	32	1	COL7A1	protein_coding	0	false	2.10057143762291	ENSG00000114270	1294	2.0	1	0.00703488925321719	0	false	0	ENSG00000114270	0
556.339136484016	4.0	0.0	0.25	0.0	7	1	PFKFB4	protein_coding	0	false	1.82289948802877	ENSG00000114268	5210	20.0	1	0.00266385118021486	0	false	0	ENSG00000114268	0
215.016897979999	4.0	0.3704440034373235	0.25	0.0	7	9	ZNF587	protein_coding	8	false	0.1662923984096	ENSG00000198466	84914	1.8888888888888888	1	0.781722438549499	0	false	0	ENSG00000198466	2184735
305.799056012995	4.5	0.0	0.2222222222222222	0.0	8	1	CEP70	protein_coding	0	false	-2.21744621883239	ENSG00000114107	80321	9.0	1	5.95247765805504E-4	0	false	0	ENSG00000114107	0
811.292466737607	2.0	0.0012243938733168612	0.5	0.0	3	2	UBE3A	protein_coding	1	false	-0.656184483175132	ENSG00000114062	7337	147.0	1	0.0950319375010861	0	false	0	ENSG00000114062	7221
88.5220667934922	5.5	0.2620043502353156	0.18181818181818182	0.0	10	2	PEDS1	protein_coding	1	false	0.0155745879947216	ENSG00000240849	387521	2.5	1	0.989328282695237	0	false	0	ENSG00000240849	1545200
64.1995932118327	6.0	0.2867107907403878	0.16666666666666666	0.0	11	3	NIT2	protein_coding	2	false	-0.569858775040936	ENSG00000114021	56954	2.3333333333333335	1	0.339839398649925	0	false	0	ENSG00000114021	1690909
2622.66714738199	2.0	0.0	0.5	0.0	3	1	BCL6	protein_coding	0	false	2.49454708289025	ENSG00000113916	604	15.0	1	2.41220831884172E-6	0	false	0	ENSG00000113916	0
193.756890646781	4.5	0.009078928895288467	0.2222222222222222	0.0	8	3	TIMMDC1	protein_coding	2	false	-0.605520261694262	ENSG00000113845	51300	9.333333333333334	1	0.267819629570994	0	false	0	ENSG00000113845	53544
895.332988760154	2.0	0.0	0.5	0.0	3	1	SMC4	protein_coding	0	false	-1.17490438039783	ENSG00000113810	10051	293.0	1	0.0399335841710132	0	false	0	ENSG00000113810	0
101.345873544282	3.5	0.0	0.2857142857142857	0.0	6	1	DBN1	protein_coding	0	false	1.59494314188986	ENSG00000113758	1627	16.0	1	0.0065437783879744	0	false	0	ENSG00000113758	0
887.235344714833	2.0	0.0	0.5	0.0	3	1	HRH2	protein_coding	0	false	2.05788595892943	ENSG00000113749	3274	2.0	1	2.93806419469688E-5	0	false	0	ENSG00000113749	0
795.533779511	4.5	0.009552340845752485	0.2222222222222222	0.0	8	2	ATP6V0E1	protein_coding	1	false	0.728943132922085	ENSG00000113732	8992	13.5	1	0.143724237259357	0	false	0	ENSG00000113732	56336
1457.09637628771	2.0	0.0	0.5	0.0	3	1	ERGIC1	protein_coding	0	false	1.42670533271325	ENSG00000113719	57222	293.0	1	0.0291858244702849	0	false	0	ENSG00000113719	0
684.351181223532	1.5	0.006255413207922122	0.6666666666666666	0.0	2	11	RBMX	protein_coding	10	false	-0.720743285395853	ENSG00000147274	27316	1.4545454545454546	1	0.0361050097267471	0	false	0	ENSG00000147274	36892
1802.35766566383	2.0	0.0	0.5	0.0	3	1	MACROH2A1	protein_coding	0	false	1.06180284979814	ENSG00000113648	9555	11.0	1	0.00792537822529999	0	false	0	ENSG00000113648	0
883.203959131806	2.0	0.0	0.5	0.0	3	1	RARS1	protein_coding	0	false	-2.09699337398049	ENSG00000113643	5917	293.0	1	5.6557304787602E-4	0	false	0	ENSG00000113643	0
327.161113825918	2.0	9.090119865464191E-4	0.5	0.0	3	2	TRIM23	protein_coding	1	false	0.316319333934965	ENSG00000113595	373	147.0	1	0.68301669570434	0	false	0	ENSG00000113595	5361
583.798036548189	2.0	9.436022579986613E-4	0.5	0.0	3	2	PPP2CA	protein_coding	1	false	0.23140632465933	ENSG00000113575	5515	5.0	1	0.622402922367646	0	false	0	ENSG00000113575	5565
122.657630618596	1.5	0.0	0.6666666666666666	0.0	2	1	BRIX1	protein_coding	0	false	-1.27069770257333	ENSG00000113460	55299	18.0	1	0.036252826524113	0	false	0	ENSG00000113460	0
279.290246381033	6.5	0.002421319001656942	0.15384615384615385	0.0	12	2	FAM172A	protein_coding	1	false	0.0361228087094216	ENSG00000113391	83989	5.5	1	0.954883554192872	0	false	0	ENSG00000113391	14280
814.424518341684	2.0	0.0	0.5	0.0	3	1	LMNB1	protein_coding	0	false	1.32139492942978	ENSG00000113368	4001	293.0	1	0.00757503137035598	0	false	0	ENSG00000113368	0
335.663210402337	13.5	0.13468163046331297	0.07407407407407407	0.0	26	2	PTPA	protein_coding	1	false	-0.604749171067584	ENSG00000119383	5524	2.5	1	0.371542728253464	0	false	0	ENSG00000119383	794300
747.866228255011	21.5	0.016507698370119974	0.046511627906976744	0.0	42	2	ITK	protein_coding	1	false	-0.862536809037743	ENSG00000113263	3702	7.0	1	0.13274387948267	0	false	0	ENSG00000113263	97356
509.21970327694	10.5	0.0	0.09523809523809523	0.0	20	1	CLK4	protein_coding	0	false	1.13735429009267	ENSG00000113240	57396	4.0	1	0.0154127653522838	0	false	0	ENSG00000113240	0
2785.85059379154	2.5	0.0	0.4	0.0	4	1	SPARC	protein_coding	0	false	1.30342726379737	ENSG00000113140	6678	6.0	1	0.0478782285371605	0	false	0	ENSG00000113140	0
246.63323070767	8.5	0.07385497723485371	0.11764705882352941	0.0	16	5	PDP1	protein_coding	4	false	-0.198706091199867	ENSG00000164951	54704	2.6	1	0.777200801107537	0	false	0	ENSG00000164951	435568
8.77196527673998	9.0	0.03629672484388597	0.1111111111111111	0.0	17	3	LOX	protein_coding	2	false	1.35025398045663	ENSG00000113083	4015	3.0	1	0.566075794090637	0	false	0	ENSG00000113083	214064
425.937596209746	2.0	0.0	0.5	0.0	3	1	BTN2A1	protein_coding	0	false	1.06173175723793	ENSG00000112763	11120	293.0	1	0.0295485600064457	0	false	0	ENSG00000112763	0
102.769100476618	11.0	0.0	0.09090909090909091	0.0	21	1	VEGFA	protein_coding	0	false	1.33834808280832	ENSG00000112715	7422	3.0	1	0.031460230297826	0	false	0	ENSG00000112715	0
955.320961307829	11.5	0.01286215505530035	0.08695652173913043	0.0	22	2	ELK4	protein_coding	1	false	-1.03832531852155	ENSG00000158711	2005	2.0	1	0.0133406349807305	0	false	0	ENSG00000158711	75856
196.314806080414	12.0	0.01042048883514209	0.08333333333333333	0.0	23	2	SRF	protein_coding	1	false	0.491460161880645	ENSG00000112658	6722	2.0	1	0.238390954570498	0	false	0	ENSG00000112658	61456
382.420205796529	9.5	0.0	0.10526315789473684	0.0	18	1	TFEB	protein_coding	0	false	1.02156180037348	ENSG00000112561	7942	2.0	1	0.0455241998678633	0	false	0	ENSG00000112561	0
132.47018396215	7.5	0.010461522392453081	0.13333333333333333	0.0	14	2	CUTA	protein_coding	1	false	-0.443532724931018	ENSG00000112514	51596	2.0	1	0.438050215946431	0	false	0	ENSG00000112514	61698
44.2484889232306	7.0	0.0025040643568956388	0.14285714285714285	0.0	13	2	EPM2A	protein_coding	1	false	-0.0656608566770514	ENSG00000112425	7957	1.5	1	0.968977669582537	0	false	0	ENSG00000112425	14768
921.059292326721	4.5	0.0	0.2222222222222222	0.0	8	1	TRIM38	protein_coding	0	false	1.00888761163482	ENSG00000112343	10475	5.0	1	0.0313149975665439	0	false	0	ENSG00000112343	0
5843.07819986321	18.5	0.0	0.05405405405405406	0.0	36	1	RPS12	protein_coding	0	false	-1.85165685338738	ENSG00000112306	6206	8.0	1	4.17434143028478E-4	0	false	0	ENSG00000112306	0
75.545248043382	6.0	0.0015835222798651388	0.16666666666666666	0.0	11	2	COX18	protein_coding	1	false	-0.204583293807042	ENSG00000163626	285521	2.0	1	0.718495763025562	0	false	0	ENSG00000163626	9339
38.9717522777904	5.0	0.0011719997856759652	0.2	0.0	9	2	E2F5	protein_coding	1	false	0.0213745916042556	ENSG00000133740	1875	2.0	1	0.987242447712385	0	false	0	ENSG00000133740	6912
404.007428150105	5.5	0.0	0.18181818181818182	0.0	10	1	E2F3	protein_coding	0	false	1.17585073232666	ENSG00000112242	1871	2.0	1	0.0173597857917845	0	false	0	ENSG00000112242	0
124.80261447139	22.0	0.0	0.045454545454545456	0.0	43	1	RAB23	protein_coding	0	false	-2.56008734016975	ENSG00000112210	51715	2.0	1	0.00145544863877571	0	false	0	ENSG00000112210	0
328.267213411129	15.0	0.0	0.06666666666666667	0.0	29	1	TREML2	protein_coding	0	false	1.35691220984082	ENSG00000112195	79865	2.0	1	0.0294365656693333	0	false	0	ENSG00000112195	0
49.5974348774136	8.5	0.05003787973844329	0.11764705882352941	0.0	16	2	SAYSD1	protein_coding	1	false	-0.235205860378014	ENSG00000112167	55776	2.0	1	0.821817058442998	0	false	0	ENSG00000112167	295104
7446.5285876344	13.0	0.0068036011863784876	0.07692307692307693	0.0	25	2	FCGR3B	protein_coding	1	false	1.70079049236896	ENSG00000162747	2215	4.0	1	0.123605070066061	0	false	0	ENSG00000162747	40125
116.078201559864	13.5	0.003712010895257267	0.07407407407407407	0.0	26	2	CILK1	protein_coding	1	false	-0.262621629487982	ENSG00000112144	22858	1.5	1	0.51537340395239	0	false	0	ENSG00000112144	21892
47.3145389970316	6.5	0.2617038896421128	0.15384615384615385	0.0	12	3	POGLUT3	protein_coding	2	false	-0.53522203064507	ENSG00000178202	143888	2.3333333333333335	1	0.503261541225954	0	false	0	ENSG00000178202	1543428
12060.7736468622	7.0	0.011420385064327732	0.14285714285714285	0.0	13	2	SOD2	protein_coding	1	false	1.51396508649675	ENSG00000112096	6648	2.5	1	0.0208589260867621	0	false	0	ENSG00000112096	67353
2394.99855146194	3.5	0.0	0.2857142857142857	0.0	6	1	MAPK14	protein_coding	0	false	2.04303885919612	ENSG00000112062	1432	16.0	1	2.87227705652939E-5	0	false	0	ENSG00000112062	0
410.838859703417	1.0	1.28526596866664E-4	1.0	0.0	1	2	NXF1	protein_coding	1	false	0.289786598442191	ENSG00000162231	10482	16.0	1	0.447239079727443	0	false	0	ENSG00000162231	758
134.642633385679	1.5	0.0	0.6666666666666666	0.0	2	1	SLC26A8	protein_coding	0	false	2.75891381155964	ENSG00000112053	116369	2.0	1	6.40873956139821E-4	0	false	0	ENSG00000112053	0
679.373021261322	21.0	0.005255686538890657	0.047619047619047616	0.0	41	2	MAP2K2	protein_coding	1	false	-0.509466977330238	ENSG00000126934	5605	7.5	1	0.429494403032426	0	false	0	ENSG00000126934	30996
8852.70795365331	21.5	0.0	0.046511627906976744	0.0	42	1	RIPOR2	protein_coding	0	false	1.21427187575266	ENSG00000111913	9750	2.0	1	0.0124857579679802	0	false	0	ENSG00000111913	0
1144.05746645335	2.0	0.0	0.5	0.0	3	1	NEDD9	protein_coding	0	false	1.46839797053471	ENSG00000111859	4739	293.0	1	0.0258895928596094	0	false	0	ENSG00000111859	0
24.117415610066	2.5	0.26242960710199315	0.4	0.0	4	7	ZNF2	protein_coding	6	false	0.111081976775026	ENSG00000275111	7549	3.7142857142857144	1	0.922624579599573	0	false	0	ENSG00000275111	1547708
63.9034369596071	3.0	0.0	0.3333333333333333	0.0	5	1	PAK1IP1	protein_coding	0	false	-1.5029427425689	ENSG00000111845	55003	7.0	1	0.00168088669617464	0	false	0	ENSG00000111845	0
400.209143131299	2.0	0.0	0.5	0.0	3	1	DSE	protein_coding	0	false	1.03709296538383	ENSG00000111817	29940	293.0	1	0.0291372281518451	0	false	0	ENSG00000111817	0
535.094593543776	5.0	0.0011445310406991848	0.2	0.0	9	2	ARL8B	protein_coding	1	false	0.00752179902917049	ENSG00000134108	55207	4.0	1	0.988777504487008	0	false	0	ENSG00000134108	6750
186.714285294489	5.5	0.0	0.18181818181818182	0.0	10	1	KLRB1	protein_coding	0	false	-1.82523648925918	ENSG00000111796	3820	2.0	1	0.0168285079221616	0	false	0	ENSG00000111796	0
330.701638947631	1.5	7.935415215514348E-4	0.6666666666666666	0.0	2	2	SRSF9	protein_coding	1	false	0.052877736833632	ENSG00000111786	8683	5.5	1	0.921116119671298	0	false	0	ENSG00000111786	4680
109.360939972262	2.0	0.0	0.5	0.0	3	1	LDHB	protein_coding	0	false	-1.37884217439514	ENSG00000111716	3945	293.0	1	1.16693952454146E-5	0	false	0	ENSG00000111716	0
2143.7688074644	22.5	0.014943675507985267	0.044444444444444446	0.0	44	2	PTPN6	protein_coding	1	false	0.835771202597311	ENSG00000111679	5777	10.5	1	0.0662026413686025	0	false	0	ENSG00000111679	88132
50.1537125104827	17.0	0.004168636390457697	0.058823529411764705	0.0	33	2	ACO1	protein_coding	1	false	-0.537186619119354	ENSG00000122729	48	1.5	1	0.516614058793078	0	false	0	ENSG00000122729	24585
129.011677100706	17.5	0.0	0.05714285714285714	0.0	34	1	C12orf57	protein_coding	0	false	-1.07644218208753	ENSG00000111678	113246	2.0	1	0.0331386113397734	0	false	0	ENSG00000111678	0
1025.06229356812	2.0	0.0	0.5	0.0	3	1	CPSF6	protein_coding	0	false	-1.05240239168991	ENSG00000111605	11052	293.0	1	0.0396868765240039	0	false	0	ENSG00000111605	0
1911.82251026066	2.0	7.035050796830989E-4	0.5	0.0	3	2	RAC2	protein_coding	1	false	0.603589948571173	ENSG00000128340	5880	2.5	1	0.202316068401558	0	false	0	ENSG00000128340	4149
257.820231967271	7.0	0.0	0.14285714285714285	0.0	13	1	LTBR	protein_coding	0	false	1.02140252230815	ENSG00000111321	4055	11.0	1	0.0287879018583939	0	false	0	ENSG00000111321	0
123.764339974494	5.5	0.003474287559100192	0.18181818181818182	0.0	10	2	MILR1	protein_coding	1	false	1.3451164790853	ENSG00000271605	284021	2.0	1	0.0149484336740863	0	false	0	ENSG00000271605	20490
162.695005472548	6.0	0.002441496660004083	0.16666666666666666	0.0	11	2	NAA25	protein_coding	1	false	-0.439331286164426	ENSG00000111300	80018	1.5	1	0.442123148679369	0	false	0	ENSG00000111300	14399
3689.29733560685	6.5	0.17281096145355104	0.15384615384615385	0.0	12	5	LRP10	protein_coding	4	false	0.118340090905523	ENSG00000197324	26020	2.4	1	0.89348746982696	0	false	0	ENSG00000197324	1019172
267.053553488366	7.0	0.0	0.14285714285714285	0.0	13	1	MANSC1	protein_coding	0	false	2.39066023022431	ENSG00000111261	54682	5.0	1	0.0149888651387263	0	false	0	ENSG00000111261	0
115.728623500058	2.5	0.0	0.4	0.0	4	1	ACSS3	protein_coding	0	false	2.28988507580821	ENSG00000111058	79611	2.0	1	0.0287153277365042	0	false	0	ENSG00000111058	0
223.955181880549	2.5	0.004271559404043535	0.4	0.0	4	3	PIP4K2B	protein_coding	2	false	-0.0237243398980733	ENSG00000276293	8396	4.333333333333333	1	0.972908436417769	0	false	0	ENSG00000276293	25192
425.397828288377	3.0	0.0	0.3333333333333333	0.0	5	1	LIN7A	protein_coding	0	false	1.80387812733869	ENSG00000111052	8825	3.0	1	0.0153824420058845	0	false	0	ENSG00000111052	0
203.435807249731	23.5	0.15565215209138886	0.0425531914893617	0.0	46	3	ATG4B	protein_coding	2	false	0.399706316490716	ENSG00000168397	23192	2.3333333333333335	1	0.404930613826822	0	false	0	ENSG00000168397	917976
779.776601339507	24.0	0.0	0.041666666666666664	0.0	47	1	CAMKK2	protein_coding	0	false	1.5488871396236	ENSG00000110931	10645	3.0	1	0.00193885957111863	0	false	0	ENSG00000110931	0
2325.2912374266	21.0	0.005081887380858558	0.047619047619047616	0.0	41	2	TNIP1	protein_coding	1	false	-0.678046683643978	ENSG00000145901	10318	7.5	1	0.273039683838708	0	false	0	ENSG00000145901	29971
1756.89950980085	21.5	0.0	0.046511627906976744	0.0	42	1	SELPLG	protein_coding	0	false	1.17882682299947	ENSG00000110876	6404	2.0	1	0.0096033494006947	0	false	0	ENSG00000110876	0
577.098976536963	4.5	0.015750103601254204	0.2222222222222222	0.0	8	3	CLEC2B	protein_coding	2	false	1.15681827065977	ENSG00000110852	9976	10.0	1	0.0479921555530192	0	false	0	ENSG00000110852	92888
225.254863574209	4.0	8.640785456893401E-4	0.25	0.0	7	2	SOCS4	protein_coding	1	false	-0.00441237010432763	ENSG00000180008	122809	1.5	1	0.995439511953451	0	false	0	ENSG00000180008	5096
150.207864672386	4.5	0.0	0.2222222222222222	0.0	8	1	VWF	protein_coding	0	false	1.86855149930002	ENSG00000110799	7450	2.0	1	0.00470537528242236	0	false	0	ENSG00000110799	0
1564.67930005781	4.5	0.023323338327445077	0.2222222222222222	0.0	8	2	TCIRG1	protein_coding	1	false	0.990724548509516	ENSG00000110719	10312	13.5	1	0.00660749655297588	0	false	0	ENSG00000110719	137552
1542.28583824658	1.5	0.0	0.6666666666666666	0.0	2	1	RPS13	protein_coding	0	false	-1.16427669749155	ENSG00000110700	6207	18.0	1	0.00526831746306265	0	false	0	ENSG00000110700	0
2323.14371610795	5.5	0.0	0.18181818181818182	0.0	10	1	SOX6	protein_coding	0	false	-1.90873531105746	ENSG00000110693	55553	6.0	1	0.0367224823083856	0	false	0	ENSG00000110693	0
74.6409491773239	15.0	0.0	0.06666666666666667	0.0	29	1	SLC22A18	protein_coding	0	false	1.46137102737704	ENSG00000110628	5002	2.0	1	0.0493652329667423	0	false	0	ENSG00000110628	0
55.7959123602619	8.0	0.07797562810167913	0.1250	0.0	15	3	CD72	protein_coding	2	false	0.309346855086876	ENSG00000137101	971	1.6666666666666667	1	0.772879520162153	0	false	0	ENSG00000137101	459870
202.686219974827	8.5	0.0	0.11764705882352941	0.0	16	1	CD5	protein_coding	0	false	-1.38089667846988	ENSG00000110448	921	3.0	1	0.0140566742138979	0	false	0	ENSG00000110448	0
318.727976505824	2.5	0.0	0.4	0.0	4	1	PDHX	protein_coding	0	false	-1.18445719940769	ENSG00000110435	8050	11.0	1	0.0453238040781716	0	false	0	ENSG00000110435	0
1495.26167089614	2.0	0.0	0.5	0.0	3	1	CBL	protein_coding	0	false	1.12634161612561	ENSG00000110395	867	293.0	1	0.00272641560510139	0	false	0	ENSG00000110395	0
8.20212099237449	3.0	0.04852726832487454	0.3333333333333333	0.0	5	5	SPOUT1	protein_coding	4	false	0.950775054833378	ENSG00000198917	51490	7.0	1	0.590826541072705	0	false	0	ENSG00000198917	286195
3368.30533949856	3.5	0.0071103355052858684	0.2857142857142857	0.0	6	4	EIF4G2	protein_coding	3	false	0.379948758227792	ENSG00000110321	1982	2.0	1	0.28828678294381	0	false	0	ENSG00000110321	41934
41.9396234891099	21.5	0.005099012956430502	0.046511627906976744	0.0	42	2	TRIM68	protein_coding	1	false	-0.164250428347146	ENSG00000167333	55128	4.0	1	0.897587194347734	0	false	0	ENSG00000167333	30072
241.809864189696	22.0	0.0	0.045454545454545456	0.0	43	1	FOLR3	protein_coding	0	false	2.76180914652348	ENSG00000110203	2352	2.0	1	0.00434361835221257	0	false	0	ENSG00000110203	0
113.273033283737	10.0	0.0023002530515740948	0.1	0.0	19	2	BTN2A2	protein_coding	1	false	0.420635542723842	ENSG00000124508	10385	2.0	1	0.481989128255096	0	false	0	ENSG00000124508	13566
177.786783571459	10.5	0.0	0.09523809523809523	0.0	20	1	ST3GAL4	protein_coding	0	false	1.64725325845544	ENSG00000110080	6484	2.0	1	0.00156060743074676	0	false	0	ENSG00000110080	0
700.376018569321	5.0	0.001086541467970426	0.2	0.0	9	2	CHP1	protein_coding	1	false	-0.189371875808906	ENSG00000187446	11261	2.5	1	0.810842146802516	0	false	0	ENSG00000187446	6408
83.3307756372884	5.5	0.0	0.18181818181818182	0.0	10	1	MS4A4A	protein_coding	0	false	2.44984977606933	ENSG00000110079	51338	2.0	1	1.95247386269269E-4	0	false	0	ENSG00000110079	0
414.477707221708	8.5	0.004297332547478539	0.11764705882352941	0.0	16	2	CCNL2	protein_coding	1	false	0.262939056367166	ENSG00000221978	81669	3.0	1	0.526136944282633	0	false	0	ENSG00000221978	25344
1330.11432779148	9.0	0.002519324770771628	0.1111111111111111	0.0	17	2	EHD1	protein_coding	1	false	0.621669447543434	ENSG00000110047	10938	1.5	1	0.232206896397896	0	false	0	ENSG00000110047	14858
140.502761858335	2.5	0.0	0.4	0.0	4	1	SIAE	protein_coding	0	false	1.4186726654898	ENSG00000110013	54414	12.0	1	0.0383603965062519	0	false	0	ENSG00000110013	0
541.597585776189	7.0	0.0	0.14285714285714285	0.0	13	1	ZBTB16	protein_coding	0	false	2.47001744865505	ENSG00000109906	7704	11.0	1	0.0103633599719325	0	false	0	ENSG00000109906	0
149.468823384615	14.0	0.0032321556589344977	0.07142857142857142	0.0	27	2	PPCS	protein_coding	1	false	0.222620811404109	ENSG00000127125	79717	3.0	1	0.767650204041135	0	false	0	ENSG00000127125	19062
485.090766553592	14.5	0.0	0.06896551724137931	0.0	28	1	BST1	protein_coding	0	false	1.45715256176511	ENSG00000109743	683	2.0	1	0.00668135809514123	0	false	0	ENSG00000109743	0
109.379015474466	4.0	8.355924397874937E-4	0.25	0.0	7	2	HMCES	protein_coding	1	false	-0.363402712744057	ENSG00000183624	56941	1.5	1	0.372949944119536	0	false	0	ENSG00000183624	4928
1878.27734448433	4.5	0.0	0.2222222222222222	0.0	8	1	NEIL3	protein_coding	0	false	-2.68038925881992	ENSG00000109674	55247	2.0	1	2.09354878541618E-4	0	false	0	ENSG00000109674	0
2066.31660093391	2.0	8.210102665282152E-4	0.5	0.0	3	2	FBXW7	protein_coding	1	false	-1.77650992692406	ENSG00000109670	55294	147.0	1	0.00151499947069757	0	false	0	ENSG00000109670	4842
97.9968643991549	8.5	0.008160591100262276	0.11764705882352941	0.0	16	2	SLC25A28	protein_coding	1	false	0.335516699156744	ENSG00000155287	81894	2.0	1	0.519817309162475	0	false	0	ENSG00000155287	48128
35.3027409228532	9.0	0.00664997968669353	0.1111111111111111	0.0	17	2	SLC2A9	protein_coding	1	false	0.447755066044532	ENSG00000109667	56606	2.0	1	0.735733950260613	0	false	0	ENSG00000109667	39219
1407.18765651032	21.0	0.0	0.047619047619047616	0.0	41	1	RPL34	protein_coding	0	false	-1.23430205767348	ENSG00000109475	6164	14.0	1	0.00157102278005373	0	false	0	ENSG00000109475	0
144.915362640957	5.0	0.010015409626811666	0.2	0.0	9	6	NACC1	protein_coding	5	false	0.43632586890344	ENSG00000160877	112939	1.8333333333333333	1	0.248675686720324	0	false	0	ENSG00000160877	59067
779.711348603568	5.5	0.0	0.18181818181818182	0.0	10	1	KLHL2	protein_coding	0	false	2.00383258672385	ENSG00000109466	11275	6.0	1	2.97808321580491E-4	0	false	0	ENSG00000109466	0
448.071679694976	19.0	0.0	0.05263157894736842	0.0	37	1	INPP4B	protein_coding	0	false	-1.01250463172476	ENSG00000109452	8821	3.0	1	0.045870134609386	0	false	0	ENSG00000109452	0
672.784653074965	12.0	0.002710419064529847	0.08333333333333333	0.0	23	2	ARL4C	protein_coding	1	false	-0.621403392383355	ENSG00000188042	10123	2.5	1	0.218405651509761	0	false	0	ENSG00000188042	15985
484.454279838065	12.5	0.0	0.08	0.0	24	1	DCUN1D4	protein_coding	0	false	-1.57650925265108	ENSG00000109184	23142	2.0	1	0.0254421310937256	0	false	0	ENSG00000109184	0
247.718739913035	3.5	0.11647663494987463	0.2857142857142857	0.0	6	4	ZNF143	protein_coding	3	false	0.194342110731377	ENSG00000166478	7702	2.25	1	0.667349195666402	0	false	0	ENSG00000166478	686934
633.040164797593	4.0	0.0	0.25	0.0	7	1	PHF12	protein_coding	0	false	1.0907778004576	ENSG00000109118	57649	4.0	1	0.00434361835221257	0	false	0	ENSG00000109118	0
4047.92082017658	2.5	4.6866426614704395E-4	0.4	0.0	4	2	ARHGDIB	protein_coding	1	false	0.327047876074354	ENSG00000111348	397	1.5	1	0.590253309712933	0	false	0	ENSG00000111348	2764
1293.84458283395	3.0	0.0	0.3333333333333333	0.0	5	1	WSB1	protein_coding	0	false	1.09066260406212	ENSG00000109046	26118	2.0	1	7.12199293640926E-4	0	false	0	ENSG00000109046	0
38.8722480436945	29.0	0.3673832730942626	0.034482758620689655	0.0	57	3	CDCA4	protein_coding	2	false	-0.428849693858393	ENSG00000170779	55038	3.0	1	0.663779030845304	0	false	0	ENSG00000170779	2166684
403.521383909945	29.5	0.0	0.03389830508474576	0.0	58	1	MAP2K6	protein_coding	0	false	1.56387150185505	ENSG00000108984	5608	3.0	1	0.00132131388953612	0	false	0	ENSG00000108984	0
365.06836760225	1.0	3.7167585795742415E-4	1.0	0.0	1	2	EFTUD2	protein_coding	1	false	0.0124660281671402	ENSG00000108883	9343	16.0	1	0.982000929161852	0	false	0	ENSG00000108883	2192
22.9187877523451	4.5	0.03858782164713447	0.2222222222222222	0.0	8	3	POLR2J3	protein_coding	2	false	0.183801264509407	ENSG00000285437	548644	3.3333333333333335	1	0.889008346053322	0	false	0	ENSG00000285437	227576
273.462612118164	5.0	0.0	0.2	0.0	9	1	DUSP3	protein_coding	0	false	1.04434631753344	ENSG00000108861	1845	3.0	1	0.0126784930227151	0	false	0	ENSG00000108861	0
374.548995629039	12.0	0.0	0.08333333333333333	0.0	23	1	ABCC3	protein_coding	0	false	1.6773916982399	ENSG00000108846	8714	3.0	1	0.007981374011699	0	false	0	ENSG00000108846	0
114.756421140181	2.0	3.474287559100192E-4	0.5	0.0	3	2	FASN	protein_coding	1	false	-0.407158288800953	ENSG00000169710	2194	147.0	1	0.58946048285907	0	false	0	ENSG00000169710	2049
180.792474593772	2.5	0.0	0.4	0.0	4	1	ALOX12	protein_coding	0	false	1.66182056191099	ENSG00000108839	239	2.0	1	0.0126154454527711	0	false	0	ENSG00000108839	0
113.569218452553	8.5	0.04950342613247532	0.11764705882352941	0.0	16	3	TMEM222	protein_coding	2	false	-0.146297704025027	ENSG00000186501	84065	3.3333333333333335	1	0.86660427466204	0	false	0	ENSG00000186501	291952
19.5042339632635	9.0	0.0028191071233577255	0.1111111111111111	0.0	17	2	PEX12	protein_coding	1	false	0.557886315412567	ENSG00000108733	5193	2.0	1	0.607397234963988	0	false	0	ENSG00000108733	16626
396.933218238194	5.0	0.0	0.2	0.0	9	1	GOSR1	protein_coding	0	false	-1.0335279093496	ENSG00000108587	9527	11.0	1	0.0296758575765882	0	false	0	ENSG00000108587	0
2284.29094160401	2.0	0.0	0.5	0.0	3	1	CPD	protein_coding	0	false	1.32904481200271	ENSG00000108582	1362	293.0	1	0.0194880849493955	0	false	0	ENSG00000108582	0
152.955009465234	3.5	6.887533462696427E-4	0.2857142857142857	0.0	6	2	SYVN1	protein_coding	1	false	-0.123950315194896	ENSG00000162298	84447	2.0	1	0.84890063798253	0	false	0	ENSG00000162298	4062
40.4678072834033	4.0	0.0	0.25	0.0	7	1	SLC6A4	protein_coding	0	false	1.865930043207	ENSG00000108576	6532	2.0	1	0.0309061177480832	0	false	0	ENSG00000108576	0
317.411319181262	14.5	0.0034373234454894625	0.06896551724137931	0.0	28	2	RNF167	protein_coding	1	false	0.483528206095712	ENSG00000108523	26001	3.5	1	0.236665763221503	0	false	0	ENSG00000108523	20272
106.961036816538	6.5	0.0013714025269888899	0.15384615384615385	0.0	12	2	GOLPH3L	protein_coding	1	false	0.0133550419660365	ENSG00000143457	55204	1.5	1	0.987701851379132	0	false	0	ENSG00000143457	8088
370.369552979251	7.0	0.0	0.14285714285714285	0.0	13	1	P2RX1	protein_coding	0	false	1.44342855681107	ENSG00000108405	5023	2.0	1	0.00417086944169888	0	false	0	ENSG00000108405	0
33.0904497085514	3.0	0.0014200662912378773	0.3333333333333333	0.0	5	2	MCRIP2	protein_coding	1	false	-0.301946399925508	ENSG00000172366	84331	2.5	1	0.798097260906774	0	false	0	ENSG00000172366	8375
1192.08026732186	3.5	0.0010204130078411398	0.2857142857142857	0.0	6	2	CASC3	protein_coding	1	false	-0.389395260262351	ENSG00000108349	22794	2.0	1	0.594421567896977	0	false	0	ENSG00000108349	6018
3655.68259221318	2.0	0.0	0.5	0.0	3	1	RPL19	protein_coding	0	false	-1.23186528641409	ENSG00000108298	6143	293.0	1	1.29270900387669E-4	0	false	0	ENSG00000108298	0
28.8046301102936	4.5	0.0028472541089512166	0.2222222222222222	0.0	8	2	PBLD	protein_coding	1	false	0.0887520986198792	ENSG00000108187	64081	2.0	1	0.927567365731374	0	false	0	ENSG00000108187	16792
486.574690371034	2.0	5.26484278721625E-4	0.5	0.0	3	2	ZMIZ1	protein_coding	1	false	0.427387021960524	ENSG00000108175	57178	147.0	1	0.46332813713658	0	false	0	ENSG00000108175	3105
493.163046738288	2.0	0.0014456698745187037	0.5	0.0	3	3	SMC3	protein_coding	2	false	-0.447284703108584	ENSG00000108055	9126	98.33333333333333	1	0.166167040349466	0	false	0	ENSG00000108055	8526
13.5327858268651	11.0	0.04291075777789383	0.09090909090909091	0.0	21	2	GDPGP1	protein_coding	1	false	0.457161605304126	ENSG00000183208	390637	2.0	1	0.7719298729104	0	false	0	ENSG00000183208	253071
115.023886801092	11.5	0.04246973181687775	0.08695652173913043	0.0	22	2	LHPP	protein_coding	1	false	-0.781806723081723	ENSG00000107902	64077	2.0	1	0.389053595432075	0	false	0	ENSG00000107902	250470
192.387845809073	2.0	0.0	0.5	0.0	3	1	ANKRD26	protein_coding	0	false	-1.45235738708664	ENSG00000107890	22852	293.0	1	0.0126784930227151	0	false	0	ENSG00000107890	0
100.339291120179	2.0	0.0	0.5	0.0	3	1	CPEB3	protein_coding	0	false	1.35711579595825	ENSG00000107864	22849	293.0	1	0.0307239829488223	0	false	0	ENSG00000107864	0
230.360188395497	9.0	0.015755868646496245	0.1111111111111111	0.0	17	2	MICU2	protein_coding	1	false	-0.45580802335382	ENSG00000165487	221154	2.0	1	0.323278789858089	0	false	0	ENSG00000165487	92922
352.060294340617	9.5	0.014662205652050356	0.10526315789473684	0.0	18	2	MICU1	protein_coding	1	false	0.758145154159928	ENSG00000107745	10367	2.0	1	0.0398674748605757	0	false	0	ENSG00000107745	86472
116.98640358431	8.0	0.0016786455263588043	0.1250	0.0	15	2	SLC25A16	protein_coding	1	false	-0.26264936057877	ENSG00000122912	8034	1.5	1	0.651948702673774	0	false	0	ENSG00000122912	9900
799.522096194564	8.5	0.0	0.11764705882352941	0.0	16	1	SPOCK2	protein_coding	0	false	-1.00204793560761	ENSG00000107742	9806	2.0	1	0.0173611994894415	0	false	0	ENSG00000107742	0
4538.24701410544	22.5	0.0	0.044444444444444446	0.0	44	1	VSIR	protein_coding	0	false	1.15465980638676	ENSG00000107738	64115	20.0	1	0.0244891234798127	0	false	0	ENSG00000107738	0
197.656899733901	3.0	0.0	0.3333333333333333	0.0	5	1	CDH23	protein_coding	0	false	1.40170877495972	ENSG00000107736	64072	8.0	1	0.045870134609386	0	false	0	ENSG00000107736	0
368.889966035727	22.5	0.0	0.044444444444444446	0.0	44	1	MAPK8	protein_coding	0	false	-1.25925713706299	ENSG00000107643	5599	20.0	1	0.0123037510480673	0	false	0	ENSG00000107643	0
232.557153391529	4.5	0.008848327085606853	0.2222222222222222	0.0	8	2	ERLIN1	protein_coding	1	false	2.15178487378691	ENSG00000107566	10613	13.5	1	0.00193885957111863	0	false	0	ENSG00000107566	52184
26.6845721833694	28.5	0.00620997108660251	0.03508771929824561	0.0	56	2	PSEN2	protein_coding	1	false	0.294004799834168	ENSG00000143801	5664	2.5	1	0.784956902839208	0	false	0	ENSG00000143801	36624
3192.17639457606	29.0	0.0	0.034482758620689655	0.0	57	1	HPS1	protein_coding	0	false	-1.84186136941221	ENSG00000107521	3257	2.0	1	0.0468809109061872	0	false	0	ENSG00000107521	0
36.783310942686	15.0	1.3047662341978414	0.06666666666666667	0.0	29	3	SUPT4H1	protein_coding	2	false	0.418792784119401	ENSG00000213246	6827	2.3333333333333335	1	0.628751947679564	0	false	0	ENSG00000213246	7695005
4264.28422678122	4.0	0.0	0.25	0.0	7	1	BAG1	protein_coding	0	false	-1.90991348447978	ENSG00000107262	573	13.0	1	0.0365436110700062	0	false	0	ENSG00000107262	0
920.53527274116	2.0	8.652654667685837E-4	0.5	0.0	3	2	DDX58	protein_coding	1	false	1.65553103409112	ENSG00000107201	23586	147.0	1	0.0449413713887144	0	false	0	ENSG00000107201	5103
70.7304206615885	21.5	0.0054622108066790425	0.046511627906976744	0.0	42	2	CREB3	protein_coding	1	false	0.121751963072221	ENSG00000107175	10488	7.0	1	0.856318631532363	0	false	0	ENSG00000107175	32214
45.716156444312	19.0	1.4652662806573238	0.05263157894736842	0.0	37	4	COMMD3	protein_coding	3	false	-0.0556694601255745	ENSG00000148444	23412	2.25	1	0.961830339913841	0	false	0	ENSG00000148444	8641572
32.499615139386	19.5	0.0	0.05128205128205128	0.0	38	1	ENG	protein_coding	0	false	-1.57138348716499	ENSG00000106991	2022	4.0	1	0.0145424810093855	0	false	0	ENSG00000106991	0
140.739329418194	10.0	0.06415901893851274	0.1	0.0	19	3	SNX9	protein_coding	2	false	0.208230180129264	ENSG00000130340	51429	2.0	1	0.804215383163196	0	false	0	ENSG00000130340	378385
18.8516449608474	10.5	0.0	0.09523809523809523	0.0	20	1	DNM1	protein_coding	0	false	2.57893330315876	ENSG00000106976	1759	3.0	1	0.0199089240218491	0	false	0	ENSG00000106976	0
55.8614816630422	4.5	8.735739143232888E-4	0.2222222222222222	0.0	8	2	TCAF2	protein_coding	1	false	0.278763846339545	ENSG00000170379	285966	1.5	1	0.701895700428444	0	false	0	ENSG00000170379	5152
3162.64968272187	5.0	0.0	0.2	0.0	9	1	MEGF9	protein_coding	0	false	1.46947988693212	ENSG00000106780	1955	2.0	1	0.00576667533196827	0	false	0	ENSG00000106780	0
56.5405706358166	32.5	0.12212671840738253	0.03076923076923077	0.0	64	6	ENTR1	protein_coding	5	false	-0.426435507364558	ENSG00000165689	10807	2.5	1	0.648841166661065	0	false	0	ENSG00000165689	720256
193.281631779241	33.0	0.018582097296329432	0.030303030303030304	0.0	65	2	PRKAG2	protein_coding	1	false	0.158879847319734	ENSG00000106617	51422	3.5	1	0.828091583713643	0	false	0	ENSG00000106617	109590
527.357788830231	7.0	0.7234629880704259	0.14285714285714285	0.0	13	4	TMEM248	protein_coding	3	false	-0.206416558757852	ENSG00000106609	55069	2.25	1	0.624192238899154	0	false	0	ENSG00000106609	4266704
11.0857416075097	7.0	0.05515995287584195	0.14285714285714285	0.0	13	6	ANKRD39	protein_coding	5	false	-0.69107976178757	ENSG00000213337	51239	2.6666666666666665	1	0.643044243099749	0	false	0	ENSG00000213337	325312
118.45714992242	7.5	0.004852133371947833	0.13333333333333333	0.0	14	2	BLVRA	protein_coding	1	false	0.335869778553178	ENSG00000106605	644	3.5	1	0.637616888699186	0	false	0	ENSG00000106605	28616
42.1839013718769	6.5	0.048538289734896094	0.15384615384615385	0.0	12	5	IGLL5	protein_coding	4	false	0.248870852459293	ENSG00000254709	100423062	2.6	1	0.916486612357111	0	false	0	ENSG00000254709	286260
69.102455026773	7.0	0.005224148350213612	0.14285714285714285	0.0	13	2	TMEM176B	protein_coding	1	false	0.302313853033713	ENSG00000106565	28959	3.0	1	0.882430326025109	0	false	0	ENSG00000106565	30810
917.168959597856	13.5	0.0	0.07407407407407407	0.0	26	1	IMPDH1	protein_coding	0	false	1.07042179095286	ENSG00000106348	3614	4.0	1	0.0293159206845421	0	false	0	ENSG00000106348	0
328.101309861401	4.5	0.014693404720419046	0.2222222222222222	0.0	8	3	TSN	protein_coding	2	false	-0.729721996352982	ENSG00000211460	7247	2.0	1	0.0248797358530894	0	false	0	ENSG00000211460	86656
23.3603386417979	5.0	0.004257655471400968	0.2	0.0	9	2	MOSPD3	protein_coding	1	false	0.433887957348487	ENSG00000106330	64598	2.5	1	0.646311051674203	0	false	0	ENSG00000106330	25110
280.64224890949	9.5	0.005109186565681161	0.10526315789473684	0.0	18	2	ZWILCH	protein_coding	1	false	-2.00670464363154	ENSG00000174442	55055	2.0	1	0.0114266479964035	0	false	0	ENSG00000174442	30132
56.2770821951826	10.0	0.0033569519324092535	0.1	0.0	19	2	SNX8	protein_coding	1	false	0.378545347413968	ENSG00000106266	29886	1.5	1	0.682968579241151	0	false	0	ENSG00000106266	19798
748.210723446103	2.0	0.0	0.5	0.0	3	1	EIF3B	protein_coding	0	false	-1.4392125683956	ENSG00000106263	8662	293.0	1	0.0234933476354563	0	false	0	ENSG00000106263	0
21.4414807858099	4.5	0.0023060180968161354	0.2222222222222222	0.0	8	2	STX1A	protein_coding	1	false	1.10794129330368	ENSG00000106089	6804	13.5	1	0.270266989642351	0	false	0	ENSG00000106089	13600
522.273205760487	30.0	0.0	0.03333333333333333	0.0	59	1	GRB10	protein_coding	0	false	3.33713096753345	ENSG00000106070	2887	6.0	1	4.37871719169536E-5	0	false	0	ENSG00000106070	0
7.73600678899488	15.5	0.0013632636395883623	0.06451612903225806	0.0	30	2	CHN1	protein_coding	1	false	-0.197731577969148	ENSG00000128656	1123	2.0	1	0.916185625169836	0	false	0	ENSG00000128656	8040
210.631194870717	7.5	0.06994051151550831	0.13333333333333333	0.0	14	3	HEXA	protein_coding	2	false	-0.247564275589076	ENSG00000213614	3073	2.6666666666666665	1	0.636180135415161	0	false	0	ENSG00000213614	412482
66.6464534356299	8.0	0.07087699224703152	0.1250	0.0	15	5	HIBADH	protein_coding	4	false	-0.714102662993472	ENSG00000106049	11112	2.4	1	0.226779924401002	0	false	0	ENSG00000106049	418005
17.5415569992698	5.0	0.005512061492007274	0.2	0.0	9	2	SLC35G1	protein_coding	1	false	-0.059808023633897	ENSG00000176273	159371	4.5	1	0.963689303874814	0	false	0	ENSG00000176273	32508
152.230468929997	5.5	0.005066457406828391	0.18181818181818182	0.0	10	2	BRAT1	protein_coding	1	false	-0.110783530973845	ENSG00000106009	221927	2.0	1	0.890452955987042	0	false	0	ENSG00000106009	29880
44.7665014903185	9.5	0.02423353723507074	0.10526315789473684	0.0	18	4	CAV2	protein_coding	3	false	0.240977481083913	ENSG00000105971	858	1.75	1	0.894087793919199	0	false	0	ENSG00000105971	142920
36.7975962704402	8.5	0.0037872956037121467	0.11764705882352941	0.0	16	2	SMCO4	protein_coding	1	false	1.00907568700943	ENSG00000166002	56935	2.5	1	0.251511990947172	0	false	0	ENSG00000166002	22336
286.717127466041	9.0	0.002233955031290631	0.1111111111111111	0.0	17	2	TFEC	protein_coding	1	false	0.681243027142156	ENSG00000105967	22797	1.5	1	0.357972138247568	0	false	0	ENSG00000105967	13175
91.6918167022926	8.5	0.3141312110732276	0.11764705882352941	0.0	16	5	EIF1AD	protein_coding	4	false	-0.287309963521714	ENSG00000175376	84285	1.8	1	0.597908781879955	0	false	0	ENSG00000175376	1852624
615.4255317468	9.0	0.0	0.1111111111111111	0.0	17	1	PALS2	protein_coding	0	false	-2.36616597497474	ENSG00000105926	51678	5.0	1	2.70005249560194E-4	0	false	0	ENSG00000105926	0
9.72040525102704	1.0	3.777800235078198E-4	1.0	0.0	1	2	STEAP1B	protein_coding	1	false	-0.491164579151636	ENSG00000105889		16.0	1	0.814179137584571	0	false	0	ENSG00000105889	2228
99.0735611825905	14.0	0.01177951347087601	0.07142857142857142	0.0	27	2	USP49	protein_coding	1	false	-0.396088893449666	ENSG00000164663	25862	2.5	1	0.639964854254753	0	false	0	ENSG00000164663	69471
12206.4953702025	14.5	0.009291218208318894	0.06896551724137931	0.0	28	2	NAMPT	protein_coding	1	false	1.5393630193897	ENSG00000105835	10135	2.0	1	0.0710048789885735	0	false	0	ENSG00000105835	54796
173.027490740548	4.5	0.0	0.2222222222222222	0.0	8	1	DNAJC2	protein_coding	0	false	-1.48051771231207	ENSG00000105821	27000	7.0	1	0.00301180189143251	0	false	0	ENSG00000105821	0
385.24675002878	2.0	9.380067729107985E-4	0.5	0.0	3	2	CDK6	protein_coding	1	false	-0.29584352655728	ENSG00000105810	1021	147.0	1	0.594048412074826	0	false	0	ENSG00000105810	5532
66.0863444353377	9.5	0.0	0.10526315789473684	0.0	18	1	SCN1B	protein_coding	0	false	2.33249418955117	ENSG00000105711	6324	3.0	1	5.63484813669505E-5	0	false	0	ENSG00000105711	0
318.79453260626	6.5	0.0	0.15384615384615385	0.0	12	1	ELL	protein_coding	0	false	1.09119695458663	ENSG00000105656	8178	10.0	1	0.0133879210798901	0	false	0	ENSG00000105656	0
149.022427662865	13.5	0.005012537277799896	0.07407407407407407	0.0	26	2	NAA30	protein_coding	1	false	-0.282640046379873	ENSG00000139977	122830	2.5	1	0.567787521615034	0	false	0	ENSG00000139977	29562
1518.4537219605	2.0	0.0	0.5	0.0	3	1	RPL18A	protein_coding	0	false	-1.0713667995813	ENSG00000105640	6142	25.0	1	0.026756508298255	0	false	0	ENSG00000105640	0
1608.6686392588	19.5	0.0	0.05128205128205128	0.0	38	1	JAK3	protein_coding	0	false	1.17500098495755	ENSG00000105639	3718	8.0	1	3.15048977869075E-4	0	false	0	ENSG00000105639	0
40.8802030164211	7.5	0.10864600790964207	0.13333333333333333	0.0	14	4	MARS2	protein_coding	3	false	-0.848079500942002	ENSG00000247626	92935	2.75	1	0.209476855749627	0	false	0	ENSG00000247626	640752
66.3176759417827	8.0	0.009436022579986611	0.1250	0.0	15	2	GCDH	protein_coding	1	false	-0.360327168182658	ENSG00000105607	2639	3.0	1	0.518545853169234	0	false	0	ENSG00000105607	55650
138.445907751032	2.5	0.0014276964981758719	0.4	0.0	4	2	TNPO2	protein_coding	1	false	0.179819416380402	ENSG00000105576	30000	5.5	1	0.809215874216538	0	false	0	ENSG00000105576	8420
107.153082123388	2.5	0.00392090900520414	0.4	0.0	4	3	C11orf54	protein_coding	2	false	0.679379462801265	ENSG00000182919	28970	3.6666666666666665	1	0.300820430121487	0	false	0	ENSG00000182919	23124
53.11907581766	6.0	0.002307205017895379	0.16666666666666666	0.0	11	2	TMEM205	protein_coding	1	false	0.0473648566780293	ENSG00000105518	374882	2.0	1	0.975225582946738	0	false	0	ENSG00000105518	13607
108.209088996497	5.5	0.05244495568714931	0.18181818181818182	0.0	10	4	RABIF	protein_coding	3	false	0.063755392858027	ENSG00000183155	5877	1.75	1	0.92793969088805	0	false	0	ENSG00000183155	309300
1018.11678969683	6.0	0.0	0.16666666666666666	0.0	11	1	RAB3D	protein_coding	0	false	1.18868212750286	ENSG00000105514	9545	4.0	1	0.0185685139278219	0	false	0	ENSG00000105514	0
8.38461198561531	10.5	0.010329604592502865	0.09523809523809523	0.0	20	3	ACOT11	protein_coding	2	false	0.511465793527698	ENSG00000162390	26027	1.6666666666666667	1	0.788025643310115	0	false	0	ENSG00000162390	60920
44.2377840011628	11.0	0.00415541069843184	0.09090909090909091	0.0	21	2	CABP5	protein_coding	1	false	0.651758948426588	ENSG00000105507	56344	2.5	1	0.505845401721783	0	false	0	ENSG00000105507	24507
685.474777319397	1.5	0.0	0.6666666666666666	0.0	2	1	NOP53	protein_coding	0	false	-1.32744474240186	ENSG00000105373	29997	18.0	1	0.0022596291217227	0	false	0	ENSG00000105373	0
1988.49387469242	2.0	0.0	0.5	0.0	3	1	RPS19	protein_coding	0	false	-1.07802369772813	ENSG00000105372	6223	293.0	1	0.00761345335869261	0	false	0	ENSG00000105372	0
381.797390601558	2.0	0.0	0.5	0.0	3	1	PLIN3	protein_coding	0	false	1.27348239714405	ENSG00000105355	10226	293.0	1	0.00203416147618522	0	false	0	ENSG00000105355	0
64.6067898569598	13.5	0.002623095585128354	0.07407407407407407	0.0	26	2	CBR1	protein_coding	1	false	0.136244172302614	ENSG00000159228	873	2.5	1	0.841985196431843	0	false	0	ENSG00000159228	15470
2439.76815284409	14.0	0.0	0.07142857142857142	0.0	27	1	DENND3	protein_coding	0	false	1.67414541565684	ENSG00000105339	22898	2.0	1	4.17434143028478E-4	0	false	0	ENSG00000105339	0
16.1913327494157	2.0	3.016475142820518E-4	0.5	0.0	3	2	MYPOP	protein_coding	1	false	-0.244504050932556	ENSG00000176182	339344	6.0	1	0.850134360203851	0	false	0	ENSG00000176182	1779
83.8278218485278	2.5	0.0	0.4	0.0	4	1	BBC3	protein_coding	0	false	1.58552908047036	ENSG00000105327	27113	2.0	1	0.026161293757474	0	false	0	ENSG00000105327	0
138.583557660537	11.5	0.12055286105630551	0.08695652173913043	0.0	22	3	LONRF1	protein_coding	2	false	0.921665993117005	ENSG00000154359	91694	3.3333333333333335	1	0.160043145705081	0	false	0	ENSG00000154359	710974
424.36041541449	12.0	0.00859534333557379	0.08333333333333333	0.0	23	2	PRKD2	protein_coding	1	false	0.928296931695021	ENSG00000105287	25865	2.0	1	0.0684138596747751	0	false	0	ENSG00000105287	50692
831.974395487007	10.5	0.003869362718334133	0.09523809523809523	0.0	20	2	AKT2	protein_coding	1	false	-0.831527700046149	ENSG00000105221	208	4.0	1	0.17021668807009	0	false	0	ENSG00000105221	22820
131.892473570618	8.0	0.0	0.1250	0.0	15	1	DYRK1B	protein_coding	0	false	-1.57979999724544	ENSG00000105204	9149	3.0	1	0.0194880849493955	0	false	0	ENSG00000105204	0
7.79885744417784	21.0	1.2298236981340924	0.047619047619047616	0.0	41	13	LAT	protein_coding	12	false	-0.580806144898457	ENSG00000213658	27040	1.7692307692307692	1	0.62457760810364	0	false	0	ENSG00000213658	7253023
111.246682612113	21.5	0.015581899928309969	0.046511627906976744	0.0	42	2	SGTA	protein_coding	1	false	0.189853013925168	ENSG00000104969	6449	7.0	1	0.801585486970582	0	false	0	ENSG00000104969	91896
2167.25650814069	15.0	0.018041369964656884	0.06666666666666667	0.0	29	2	STAT6	protein_coding	1	false	0.124051662389329	ENSG00000166888	6778	2.5	1	0.830943636775358	0	false	0	ENSG00000166888	106401
52.6986983832556	15.5	0.015687705464516827	0.06451612903225806	0.0	30	2	FCER2	protein_coding	1	false	-0.916905040696367	ENSG00000104921	2208	2.0	1	0.436433966856259	0	false	0	ENSG00000104921	92520
222.563077416105	11.5	0.0021747785374826288	0.08695652173913043	0.0	22	2	ZNF664	protein_coding	1	false	0.322518541858578	ENSG00000179195	144348	1.5	1	0.506023994961389	0	false	0	ENSG00000179195	12826
77.2157546971961	12.0	0.0	0.08333333333333333	0.0	23	1	RETN	protein_coding	0	false	2.98441363686595	ENSG00000104918	56729	2.0	1	0.00195615610249358	0	false	0	ENSG00000104918	0
83.5399251407456	27.0	0.005221265827592592	0.037037037037037035	0.0	53	2	CBFA2T3	protein_coding	1	false	0.49002738642528	ENSG00000129993	863	1.5	1	0.57346057355034	0	false	0	ENSG00000129993	30793
2142.47822673165	27.5	0.0	0.03636363636363636	0.0	54	1	LYL1	protein_coding	0	false	-1.64041448945881	ENSG00000104903	4066	2.0	1	0.0444234333495181	0	false	0	ENSG00000104903	0
10641.9863417302	12.0	0.01891053531497155	0.08333333333333333	0.0	23	2	PPBP	protein_coding	1	false	0.233199707747223	ENSG00000163736	5473	3.0	1	0.846363771358211	0	false	0	ENSG00000163736	111527
116.758989514535	12.5	0.01737652460012629	0.08	0.0	24	2	PLEKHJ1	protein_coding	1	false	0.127405660204124	ENSG00000104886	55111	2.0	1	0.835529443331262	0	false	0	ENSG00000104886	102480
27.8124861386818	13.0	0.0598928854594029	0.07692307692307693	0.0	25	3	NKIRAS1	protein_coding	2	false	0.473148724542147	ENSG00000197885	28512	2.3333333333333335	1	0.638205204951762	0	false	0	ENSG00000197885	353225
81.1058691487594	13.5	0.052038689557739645	0.07407407407407407	0.0	26	3	NFKBIB	protein_coding	2	false	0.191358732008777	ENSG00000104825	4793	2.3333333333333335	1	0.712018014214047	0	false	0	ENSG00000104825	306904
33.2816501460017	9.5	0.9576367519599459	0.10526315789473684	0.0	18	4	WASHC1	protein_coding	3	false	0.53491821285487	ENSG00000181404	100287171	2.25	1	0.708444145902564	0	false	0	ENSG00000181404	5647770
124.828361694802	10.0	0.006249987282988437	0.1	0.0	19	2	GYS1	protein_coding	1	false	0.168745280510418	ENSG00000104812	2997	2.5	1	0.776488179469239	0	false	0	ENSG00000104812	36860
74.1990655775829	14.5	0.003636726186802387	0.06896551724137931	0.0	28	2	KCNN4	protein_coding	1	false	0.220711291381189	ENSG00000104783	3783	3.5	1	0.835402377756392	0	false	0	ENSG00000104783	21448
20.0995302906682	5.0	0.00317264004481814	0.2	0.0	9	2	UBXN8	protein_coding	1	false	-0.652130305971576	ENSG00000104691	7993	3.0	1	0.680651612913337	0	false	0	ENSG00000104691	18711
477.695533400492	4.0	0.002577992584117097	0.25	0.0	7	2	IKBKB	protein_coding	1	false	0.208567681517424	ENSG00000104365	3551	10.5	1	0.684560802337157	0	false	0	ENSG00000104365	15204
139.759980445439	11.0	0.0020296350455065544	0.09090909090909091	0.0	21	2	PIP5K1C	protein_coding	1	false	0.186447732516837	ENSG00000186111	23396	1.5	1	0.729430043794273	0	false	0	ENSG00000186111	11970
94.6227243393265	11.5	0.0	0.08695652173913043	0.0	22	1	LAPTM4B	protein_coding	0	false	1.8643706788663	ENSG00000104341	55353	2.0	1	0.0219355902919745	0	false	0	ENSG00000104341	0
287.377548989558	7.0	0.004163888706140723	0.14285714285714285	0.0	13	2	COX7A2L	protein_coding	1	false	0.0409543830415625	ENSG00000115944	9167	2.5	1	0.933147158342991	0	false	0	ENSG00000115944	24557
424.637290009055	7.5	0.0031358454913615885	0.13333333333333333	0.0	14	2	CPQ	protein_coding	1	false	0.991657698093025	ENSG00000104324	10404	2.0	1	0.0454592856801384	0	false	0	ENSG00000104324	18494
47.5646147380486	26.0	0.895386471677011	0.038461538461538464	0.0	51	6	SAMD1	protein_coding	5	false	0.0727459280671493	ENSG00000141858	90378	2.5	1	0.948953908131079	0	false	0	ENSG00000141858	5280642
158.949162209763	26.5	0.017969306899131378	0.03773584905660377	0.0	52	2	TRIM35	protein_coding	1	false	-0.0949109100498035	ENSG00000104228	23087	3.5	1	0.869711497907776	0	false	0	ENSG00000104228	105976
613.633468107453	7.5	0.0	0.13333333333333333	0.0	14	1	CSPP1	protein_coding	0	false	-1.82083354769466	ENSG00000104218	79848	13.0	1	0.0114184840583742	0	false	0	ENSG00000104218	0
424.661862285247	4.0	0.0	0.25	0.0	7	1	EIF3J	protein_coding	0	false	-1.34035656403437	ENSG00000104131	8669	20.0	1	0.0473359409964773	0	false	0	ENSG00000104131	0
419.869475389293	23.0	0.0	0.043478260869565216	0.0	45	1	ATP8B4	protein_coding	0	false	1.27115577897917	ENSG00000104043	79895	2.0	1	0.0279954311614333	0	false	0	ENSG00000104043	0
10.2576091342472	7.0	0.0012366022044176526	0.14285714285714285	0.0	13	2	RYR1	protein_coding	1	false	-0.104886384641579	ENSG00000196218	6261	2.0	1	0.969094110511987	0	false	0	ENSG00000196218	7293
80.9124324521027	7.5	0.0	0.13333333333333333	0.0	14	1	HOMER2	protein_coding	0	false	1.55667637147423	ENSG00000103942	9455	2.0	1	0.019281240681203	0	false	0	ENSG00000103942	0
874.684068145846	1.5	2.6993976545082996E-4	0.6666666666666666	0.0	2	2	CSK	protein_coding	1	false	0.49325459153285	ENSG00000103653	1445	5.5	1	0.292946594380052	0	false	0	ENSG00000103653	1592
46.9508969685575	20.5	0.2729104593520225	0.04878048780487805	0.0	40	14	TNF	protein_coding	13	false	0.160049774187841	ENSG00000232810	7124	1.7857142857142858	1	0.891858792501076	0	false	0	ENSG00000232810	1609520
187.993956738651	21.0	0.029163498717786115	0.047619047619047616	0.0	41	3	LACTB	protein_coding	2	false	0.42642720905053	ENSG00000103642	114294	5.333333333333333	1	0.414154946736039	0	false	0	ENSG00000103642	171995
27.2973116513207	9.0	0.08035608310617925	0.1111111111111111	0.0	17	3	CCDC167	protein_coding	2	false	-0.0496914250278811	ENSG00000198937	154467	2.0	1	0.971380676752872	0	false	0	ENSG00000198937	473909
4185.63758114781	9.5	0.017286996838720488	0.10526315789473684	0.0	18	2	AQP9	protein_coding	1	false	2.02969081486016	ENSG00000103569	366	4.5	1	0.0127781990680118	0	false	0	ENSG00000103569	101952
181.874332294873	4.5	0.0763305554858475	0.2222222222222222	0.0	8	8	STX4	protein_coding	7	false	0.405429852016496	ENSG00000103496	6810	4.25	1	0.267819629570994	0	false	0	ENSG00000103496	450168
278.258008015392	18.5	0.012934726801288387	0.05405405405405406	0.0	36	3	PYCARD	protein_coding	2	false	0.546624019077087	ENSG00000103490	29108	1.3333333333333333	1	0.508915445948464	0	false	0	ENSG00000103490	76284
146.755580344223	6.0	0.679109103820326	0.16666666666666666	0.0	11	5	ZNF622	protein_coding	4	false	0.07483694675791	ENSG00000173545	90441	2.8	1	0.909433957513816	0	false	0	ENSG00000173545	4005122
157.000249422659	6.5	0.6736923351349665	0.15384615384615385	0.0	12	3	UBFD1	protein_coding	2	false	-0.635334666127854	ENSG00000103353	56061	3.6666666666666665	1	0.235079866090789	0	false	0	ENSG00000103353	3973176
1516.53400430764	19.5	0.0	0.05128205128205128	0.0	38	1	MEFV	protein_coding	0	false	1.46161518571155	ENSG00000103313	4210	4.0	1	0.00198400392770372	0	false	0	ENSG00000103313	0
331.831891945395	22.5	0.009586931117204727	0.044444444444444446	0.0	44	2	TSC2	protein_coding	1	false	0.148990713998959	ENSG00000103197	7249	10.5	1	0.765745497095563	0	false	0	ENSG00000103197	56540
118.532846512813	15.0	0.002694649970191325	0.06666666666666667	0.0	29	2	IQCB1	protein_coding	1	false	-0.404260338663842	ENSG00000173226	9657	2.5	1	0.396293365859032	0	false	0	ENSG00000173226	15892
1119.19357410126	15.5	0.0	0.06451612903225806	0.0	30	1	CRISPLD2	protein_coding	0	false	1.96082279170486	ENSG00000103196	83716	2.0	1	0.00754875627467452	0	false	0	ENSG00000103196	0
13.141161824807	2.5	0.0	0.4	0.0	4	1	WFDC1	protein_coding	0	false	3.66872380802421	ENSG00000103175	58189	2.0	1	0.0464290284572465	0	false	0	ENSG00000103175	0
210.877015857403	7.5	0.04689287799875611	0.13333333333333333	0.0	14	2	PITPNB	protein_coding	1	false	-0.531360807232526	ENSG00000180957	23760	2.0	1	0.166079725953446	0	false	0	ENSG00000180957	276556
112.267757165033	8.0	0.0488562150239792	0.1250	0.0	15	2	HSDL1	protein_coding	1	false	0.339091270341659	ENSG00000103160	83693	2.0	1	0.614382515808821	0	false	0	ENSG00000103160	288135
73.4320158093628	3.5	0.1682358893735295	0.2857142857142857	0.0	6	3	NUDT19	protein_coding	2	false	0.131335346713022	ENSG00000213965	390916	2.6666666666666665	1	0.848267954378259	0	false	0	ENSG00000213965	992190
131.963856479764	4.0	0.004961330111238244	0.25	0.0	7	3	VAC14	protein_coding	2	false	-0.0884871669218187	ENSG00000103043	55697	2.0	1	0.928005901329854	0	false	0	ENSG00000103043	29260
261.775216967124	8.0	0.0	0.1250	0.0	15	1	USB1	protein_coding	0	false	1.56962702869952	ENSG00000103005	79650	4.0	1	0.00186901772501981	0	false	0	ENSG00000103005	0
39.4184012253436	4.0	0.01322111390169445	0.25	0.0	7	7	HYPK	protein_coding	6	false	0.19472447223785	ENSG00000242028	25764	3.857142857142857	1	0.818745509526365	0	false	0	ENSG00000242028	77973
757.276228197124	4.5	0.0	0.2222222222222222	0.0	8	1	N4BP1	protein_coding	0	false	1.40635194556242	ENSG00000102921	9683	7.0	1	0.00393337209427315	0	false	0	ENSG00000102921	0
42.6063891179343	11.5	0.0	0.08695652173913043	0.0	22	1	GDPD3	protein_coding	0	false	1.97903460726508	ENSG00000102886	79153	4.0	1	0.0046373378187574	0	false	0	ENSG00000102886	0
311.921601050869	7.0	0.0	0.14285714285714285	0.0	13	1	MAPK3	protein_coding	0	false	1.0547111154081	ENSG00000102882	5595	6.0	1	0.0363704584304515	0	false	0	ENSG00000102882	0
92.2602230336294	30.5	0.04810082453711774	0.03278688524590164	0.0	60	5	FAAP100	protein_coding	4	false	-0.0153894490150786	ENSG00000185504	80233	1.4	1	0.987764357447136	0	false	0	ENSG00000185504	283680
325.04215386834	31.0	0.0	0.03225806451612903	0.0	61	1	OLFM4	protein_coding	0	false	3.06816790842054	ENSG00000102837	10562	5.0	1	0.0493761567941131	0	false	0	ENSG00000102837	0
67.6068037498972	10.5	0.16320843080216196	0.09523809523809523	0.0	20	5	PLCD1	protein_coding	4	false	-0.368514571610914	ENSG00000187091	5333	2.2	1	0.441394988514712	0	false	0	ENSG00000187091	962540
80.5299787180416	11.0	0.0	0.09090909090909091	0.0	21	1	DHRS12	protein_coding	0	false	1.62234506565418	ENSG00000102796	79758	5.0	1	0.0244891234798127	0	false	0	ENSG00000102796	0
13.9350564328985	9.0	0.1407045766998575	0.1111111111111111	0.0	17	2	ADAM32	protein_coding	1	false	-1.23883579287879	ENSG00000197140	203102	4.5	1	0.376099432793472	0	false	0	ENSG00000197140	829821
823.187297616187	9.5	0.14735760846932625	0.10526315789473684	0.0	18	4	INTS6	protein_coding	3	false	0.678334456247839	ENSG00000102786	26512	2.5	1	0.0900826350445167	0	false	0	ENSG00000102786	869058
378.873227283268	2.0	0.0	0.5	0.0	3	1	DGKH	protein_coding	0	false	1.67947696040667	ENSG00000102780	160851	293.0	1	0.038197561040787	0	false	0	ENSG00000102780	0
29.4475936603424	5.0	0.5600953402834911	0.2	0.0	9	2	RDH14	protein_coding	1	false	-0.65400742503265	ENSG00000240857	57665	2.5	1	0.461018486693658	0	false	0	ENSG00000240857	3303225
169.018202531975	5.5	0.6214311826549458	0.18181818181818182	0.0	10	3	GLA	protein_coding	2	false	0.689300007028333	ENSG00000102393	2717	3.0	1	0.23554235691388	0	false	0	ENSG00000102393	3664960
98.0368523875482	5.0	0.06745408141464715	0.2	0.0	9	4	TKFC	protein_coding	3	false	0.0893864394356974	ENSG00000149476	26007	2.25	1	0.908278177710939	0	false	0	ENSG00000149476	397818
185.009514689291	5.5	0.06541630748174007	0.18181818181818182	0.0	10	3	SMS	protein_coding	2	false	0.347945780100134	ENSG00000102172	6611	3.0	1	0.465829824414744	0	false	0	ENSG00000102172	385800
165.262856598445	4.5	7.121526475461595E-4	0.2222222222222222	0.0	8	2	HMGA1	protein_coding	1	false	-0.0918689147324415	ENSG00000137309	3159	3.0	1	0.89055549722098	0	false	0	ENSG00000137309	4200
22.1543606443106	5.0	0.0	0.2	0.0	9	1	KCND1	protein_coding	0	false	2.89458511082846	ENSG00000102057	3750	2.0	1	0.00157197400006658	0	false	0	ENSG00000102057	0
9.51500528075898	9.0	0.0015075593307935485	0.1111111111111111	0.0	17	2	PDCD2L	protein_coding	1	false	-0.0803384019096266	ENSG00000126249	84306	3.0	1	0.974783963072105	0	false	0	ENSG00000126249	8891
74.838461571266	9.5	0.0	0.10526315789473684	0.0	18	1	BMX	protein_coding	0	false	2.80706992438948	ENSG00000102010	660	2.0	1	0.0273359937894029	0	false	0	ENSG00000102010	0
163.505921254208	22.5	1.1032282218633576	0.044444444444444446	0.0	44	6	SLC9A6	protein_coding	5	false	-0.141417179098677	ENSG00000198689	10479	1.6666666666666667	1	0.787114733382924	0	false	0	ENSG00000198689	6506412
27.8400576255816	23.0	0.0	0.043478260869565216	0.0	45	1	VSIG1	protein_coding	0	false	-1.90062180662127	ENSG00000101842	340547	6.0	1	0.0249018289482844	0	false	0	ENSG00000101842	0
44.7667450422152	1.5	0.001600647855437082	0.6666666666666666	0.0	2	3	CSTF2	protein_coding	2	false	0.149044370216806	ENSG00000101811	1478	4.0	1	0.849455740305136	0	false	0	ENSG00000101811	9440
293.664116848412	2.0	0.0	0.5	0.0	3	1	RBBP8	protein_coding	0	false	-1.44516679293576	ENSG00000101773	5932	15.0	1	0.0116462811497265	0	false	0	ENSG00000101773	0
8258.44289833148	2.0	0.0	0.5	0.0	3	1	SMCHD1	protein_coding	0	false	1.12346172107991	ENSG00000101596	23347	293.0	1	0.048468119603705	0	false	0	ENSG00000101596	0
287.156015991233	4.0	0.0	0.25	0.0	7	1	USP14	protein_coding	0	false	-1.26882944501427	ENSG00000101557	9097	13.0	1	0.0170315044655625	0	false	0	ENSG00000101557	0
843.441415728506	2.0	0.0	0.5	0.0	3	1	ZNF516	protein_coding	0	false	1.4449706737469	ENSG00000101493	9658	293.0	1	0.00238460736033379	0	false	0	ENSG00000101493	0
1039.20787840724	2.0	0.0	0.5	0.0	3	1	APMAP	protein_coding	0	false	1.45657222773968	ENSG00000101474	57136	293.0	1	0.00455129414048648	0	false	0	ENSG00000101474	0
1817.43629733705	3.0	4.3492179546569023E-4	0.3333333333333333	0.0	5	2	RHBDD1	protein_coding	1	false	-1.38068108562151	ENSG00000144468	84236	2.0	1	0.0833720544938784	0	false	0	ENSG00000144468	2565
170.26112227658	3.5	0.0	0.2857142857142857	0.0	6	1	BPI	protein_coding	0	false	2.58935246502049	ENSG00000101425	671	2.0	1	0.0166346116745848	0	false	0	ENSG00000101425	0
418.358242711526	16.0	0.011122467873437588	0.0625	0.0	31	2	STAM	protein_coding	1	false	-0.666831440045384	ENSG00000136738	8027	2.0	1	0.324215713130366	0	false	0	ENSG00000136738	65596
12.245781282561	16.5	0.008708609518564463	0.06060606060606061	0.0	32	2	SNTA1	protein_coding	1	false	-1.44349946951212	ENSG00000101400	6640	1.5	1	0.222560509561726	0	false	0	ENSG00000101400	51360
1989.76991651831	5.0	0.0	0.2	0.0	9	1	HCK	protein_coding	0	false	1.11618386092962	ENSG00000101336	3055	5.0	1	0.0346846756689027	0	false	0	ENSG00000101336	0
1415.3061831662	18.5	0.003100916099600991	0.05405405405405406	0.0	36	2	SYK	protein_coding	1	false	0.735972312419425	ENSG00000165025	6850	4.5	1	0.0823359975620032	0	false	0	ENSG00000165025	18288
650.02121885504	19.0	0.0	0.05263157894736842	0.0	37	1	SIRPB1	protein_coding	0	false	1.28368404847352	ENSG00000101307	10326	2.0	1	0.0123037510480673	0	false	0	ENSG00000101307	0
4114.0149442596	2.0	0.0	0.5	0.0	3	1	RASSF2	protein_coding	0	false	1.17266921698691	ENSG00000101265	9770	293.0	1	0.0384567790180608	0	false	0	ENSG00000101265	0
328.994401930294	15.5	0.0025688363357915037	0.06451612903225806	0.0	30	2	UQCRH	protein_coding	1	false	0.13173909802248	ENSG00000173660	7388	3.0	1	0.836534569444593	0	false	0	ENSG00000173660	15150
1711.12080839541	16.0	0.0	0.0625	0.0	31	1	RNF24	protein_coding	0	false	1.95985036775059	ENSG00000101236	11237	2.0	1	8.32486388437932E-5	0	false	0	ENSG00000101236	0
692.508425480825	13.0	0.06622171821408394	0.07692307692307693	0.0	25	4	TXNRD1	protein_coding	3	false	0.530940815461294	ENSG00000198431	7296	4.5	1	0.216635911061404	0	false	0	ENSG00000198431	390550
643.723151833086	13.5	0.0	0.07407407407407407	0.0	26	1	TPD52L2	protein_coding	0	false	1.00938154013354	ENSG00000101150	7165	4.0	1	0.0129854091584868	0	false	0	ENSG00000101150	0
30.9925690213804	4.0	5.946474607010431E-4	0.25	0.0	7	2	PAIP2B	protein_coding	1	false	-0.514529666858543	ENSG00000124374	400961	1.5	1	0.717019793035949	0	false	0	ENSG00000124374	3507
97.4330348689442	4.5	0.0	0.2222222222222222	0.0	8	1	PABPC1L	protein_coding	0	false	1.42294481332213	ENSG00000101104	80336	2.0	1	0.00750136533251601	0	false	0	ENSG00000101104	0
1240.28266986384	2.0	0.0	0.5	0.0	3	1	ZMYND8	protein_coding	0	false	-1.33509626024823	ENSG00000101040	23613	293.0	1	0.0468663083234453	0	false	0	ENSG00000101040	0
295.222415025366	12.5	0.0020265829627313563	0.08	0.0	24	2	CXCL5	protein_coding	1	false	-6.06930380821645E-4	ENSG00000163735	6374	1.5	1	0.999364425998527	0	false	0	ENSG00000163735	11952
1571.30771401956	13.0	0.0	0.07692307692307693	0.0	25	1	MMP9	protein_coding	0	false	2.85534300096726	ENSG00000100985	4318	2.0	1	0.00307205546434837	0	false	0	ENSG00000100985	0
35.8638437034768	3.5	0.03623330934622353	0.2857142857142857	0.0	6	4	NFKBIL1	protein_coding	3	false	0.20908300520539	ENSG00000204498	4795	2.5	1	0.853689505123824	0	false	0	ENSG00000204498	213690
589.833808907273	4.0	0.0	0.25	0.0	7	1	PNN	protein_coding	0	false	-1.00394707726699	ENSG00000100941	5411	4.0	1	0.0206908976736825	0	false	0	ENSG00000100941	0
14.4204377331463	5.0	0.0031466973412289587	0.2	0.0	9	2	EMC9	protein_coding	1	false	0.151604540597565	ENSG00000100908	51016	3.0	1	0.925714563080888	0	false	0	ENSG00000100908	18558
1206.37520922734	2.0	0.010621248057688435	0.5	0.0	3	10	BRD2	protein_coding	9	false	0.513124353270225	ENSG00000204256	6046	3.8	1	0.00120575090011968	0	false	0	ENSG00000204256	62640
2328.42212149517	2.5	0.0	0.4	0.0	4	1	VRK1	protein_coding	0	false	-1.80306296849302	ENSG00000100749	7443	10.0	1	0.0308311758756692	0	false	0	ENSG00000100749	0
2973.83385085653	2.0	0.0	0.5	0.0	3	1	PCNX1	protein_coding	0	false	1.41020504947677	ENSG00000100731	22990	293.0	1	0.00219671083246082	0	false	0	ENSG00000100731	0
1826.52439573878	2.0	0.0	0.5	0.0	3	1	DICER1	protein_coding	0	false	1.05842914631673	ENSG00000100697	23405	293.0	1	0.0365764429969019	0	false	0	ENSG00000100697	0
1280.12385090408	2.0	0.1025937277664248	0.5	0.0	3	5	SRSF5	protein_coding	4	false	-0.290418342410587	ENSG00000100650	6430	7.2	1	0.12522698034934	0	false	0	ENSG00000100650	605058
125.870367722031	5.0	7.447081971482696E-4	0.2	0.0	9	2	TMEM19	protein_coding	1	false	-0.0493121353933757	ENSG00000139291	55266	4.0	1	0.957731193487882	0	false	0	ENSG00000139291	4392
925.014980686766	5.5	0.0	0.18181818181818182	0.0	10	1	SUSD6	protein_coding	0	false	1.03542492622813	ENSG00000100647	9766	2.0	1	0.0133586644848185	0	false	0	ENSG00000100647	0
238.124114379464	2.0	0.0	0.5	0.0	3	1	CEP128	protein_coding	0	false	-1.39484710301454	ENSG00000100629	145508	293.0	1	0.0268257621311992	0	false	0	ENSG00000100629	0
1434.78941868572	2.0	0.0	0.5	0.0	3	1	SPTLC2	protein_coding	0	false	1.25028032557003	ENSG00000100596	9517	293.0	1	0.00364688962108495	0	false	0	ENSG00000100596	0
606.959399116225	5.0	0.00397381177330757	0.2	0.0	9	2	TMED8	protein_coding	1	false	1.4080143636029	ENSG00000100580	283578	7.0	1	0.00146344883503993	0	false	0	ENSG00000100580	23436
254.916091958576	29.5	0.36229273814554097	0.03389830508474576	0.0	58	6	PPP2R2D	protein_coding	5	false	-0.288189415536587	ENSG00000175470	55844	1.6666666666666667	1	0.503369549270199	0	false	0	ENSG00000175470	2136662
88.6485273729214	30.0	0.0	0.03333333333333333	0.0	59	1	CDKN3	protein_coding	0	false	-1.97810140697721	ENSG00000100526	1033	6.0	1	0.0146189495650863	0	false	0	ENSG00000100526	0
2314.66148181564	2.0	0.0	0.5	0.0	3	1	PYGL	protein_coding	0	false	1.64601065547881	ENSG00000100504	5836	293.0	1	0.00592521632912746	0	false	0	ENSG00000100504	0
2944.25773447242	2.0	0.0	0.5	0.0	3	1	NIN	protein_coding	0	false	1.01299356659528	ENSG00000100503	51199	293.0	1	0.0208359926256166	0	false	0	ENSG00000100503	0
134.529036517712	14.0	0.04753466318231854	0.07142857142857142	0.0	27	3	RAD17	protein_coding	2	false	-0.494390717994215	ENSG00000152942	5884	2.0	1	0.426744946892529	0	false	0	ENSG00000152942	280341
490.865349862809	14.5	0.0	0.06896551724137931	0.0	28	1	POLE2	protein_coding	0	false	-1.92533378265661	ENSG00000100479	5427	3.0	1	0.0199089240218491	0	false	0	ENSG00000100479	0
269.671819897774	11.0	0.012608662624804753	0.09090909090909091	0.0	21	4	KDELR2	protein_coding	3	false	-0.187363351689591	ENSG00000136240	11014	2.25	1	0.776725868339518	0	false	0	ENSG00000136240	74361
355.807386236982	11.5	0.003894457621152426	0.08695652173913043	0.0	22	2	GZMH	protein_coding	1	false	-0.869196609199369	ENSG00000100450	2999	2.5	1	0.288071929118848	0	false	0	ENSG00000100450	22968
152.189978363332	3.5	0.011968233922475742	0.2857142857142857	0.0	6	4	NELFB	protein_coding	3	false	0.197706456212052	ENSG00000188986	25920	2.75	1	0.725050256096283	0	false	0	ENSG00000188986	70584
303.847739348846	4.0	0.0	0.25	0.0	7	1	FKBP3	protein_coding	0	false	-1.93512344623764	ENSG00000100442	2287	4.0	1	7.91234544977531E-4	0	false	0	ENSG00000100442	0
402.620064996275	31.5	0.23472822559368098	0.031746031746031744	0.0	62	2	CPNE1	protein_coding	1	false	0.347255512207735	ENSG00000214078	8904	3.5	1	0.411380404310572	0	false	0	ENSG00000214078	1384336
2072.26263307358	32.0	0.2334614416818197	0.03125	0.0	63	5	ST13	protein_coding	4	false	-1.01778032124056	ENSG00000100380	6767	3.0	1	0.30010662539545	0	false	0	ENSG00000100380	1376865
28.3556918658342	18.5	0.002875061974236352	0.05405405405405406	0.0	36	2	SOCS1	protein_coding	1	false	0.27595482716978	ENSG00000185338	8651	4.5	1	0.849127685508346	0	false	0	ENSG00000185338	16956
3000.97510190133	19.0	0.0	0.05263157894736842	0.0	37	1	CSF2RB	protein_coding	0	false	1.30317230832395	ENSG00000100368	1439	2.0	1	0.039538920070271	0	false	0	ENSG00000100368	0
1642.41162554689	2.0	2.385711369279634E-4	0.5	0.0	3	2	PRKDC	protein_coding	1	false	0.0340564007211767	ENSG00000253729	5591	147.0	1	0.966842585538097	0	false	0	ENSG00000253729	1407
1008.45559098885	2.5	0.0	0.4	0.0	4	1	NCF4	protein_coding	0	false	1.78750202864854	ENSG00000100365	4689	2.0	1	0.00375682096525693	0	false	0	ENSG00000100365	0
3839.77378788198	1.5	0.0	0.6666666666666666	0.0	2	1	RPL3	protein_coding	0	false	-1.20962423029012	ENSG00000100316	6122	18.0	1	5.95247765805504E-4	0	false	0	ENSG00000100316	0
465.921691863372	3.5	0.0	0.2857142857142857	0.0	6	1	TOM1	protein_coding	0	false	1.06191963062024	ENSG00000100284	10043	16.0	1	0.00720439383727146	0	false	0	ENSG00000100284	0
350.784453814987	14.0	0.01180698221585279	0.07142857142857142	0.0	27	3	RIC8A	protein_coding	2	false	0.327456032082775	ENSG00000177963	60626	2.6666666666666665	1	0.392582965534392	0	false	0	ENSG00000177963	69633
911.134937022429	14.5	0.0	0.06896551724137931	0.0	28	1	PACSIN2	protein_coding	0	false	1.12614555749993	ENSG00000100266	11252	3.0	1	0.0146189495650863	0	false	0	ENSG00000100266	0
56.5182545236536	23.5	0.03980221147135485	0.0425531914893617	0.0	46	5	FIGNL1	protein_coding	4	false	0.0776852772861408	ENSG00000132436	63979	1.4	1	0.940928813109521	0	false	0	ENSG00000132436	234738
71.8249607785001	24.0	0.0	0.041666666666666664	0.0	47	1	DMC1	protein_coding	0	false	-1.69095172976582	ENSG00000100206	11144	5.0	1	0.0391893410583177	0	false	0	ENSG00000100206	0
215.977292480832	2.5	0.02111295215758514	0.4	0.0	4	15	SMNDC1	protein_coding	14	false	0.33776102987792	ENSG00000119953	10285	1.1333333333333333	1	0.408942268951842	0	false	0	ENSG00000119953	124516
80.7706472363139	3.0	0.0	0.3333333333333333	0.0	5	1	TPTEP1	transcribed_unprocessed_pseudogene	0	false	1.83164615497708	ENSG00000100181	387590	15.0	1	0.0160687874702744	0	false	0	ENSG00000100181	0
603.405403738823	14.0	0.1377557560585539	0.07142857142857142	0.0	27	3	CCNG1	protein_coding	2	false	-0.188324676152831	ENSG00000113328	900	1.6666666666666667	1	0.768454076825145	0	false	0	ENSG00000113328	812430
55.1287700422157	5.5	0.0036370653071107427	0.18181818181818182	0.0	10	3	TMEM218	protein_coding	2	false	0.587590391308585	ENSG00000150433	219854	1.6666666666666667	1	0.452829331001433	0	false	0	ENSG00000150433	21450
637.141767988256	6.0	0.0	0.16666666666666666	0.0	11	1	PIK3IP1	protein_coding	0	false	-1.33161162855657	ENSG00000100100	113791	3.0	1	2.78726242420782E-4	0	false	0	ENSG00000100100	0
797.360114385037	9.5	0.003485478529275917	0.10526315789473684	0.0	18	2	PPM1F	protein_coding	1	false	0.64428284116396	ENSG00000100034	9647	3.0	1	0.292946594380052	0	false	0	ENSG00000100034	20556
303.359424300271	10.0	0.9945340588699291	0.1	0.0	19	4	UBL5	protein_coding	3	false	0.00890260419546283	ENSG00000198258	59286	2.5	1	0.991720774976853	0	false	0	ENSG00000198258	5865376
973.035097974846	10.5	0.0066806700745996855	0.09523809523809523	0.0	20	2	CRKL	protein_coding	1	false	0.331003357353582	ENSG00000099942	1399	2.5	1	0.496697689323959	0	false	0	ENSG00000099942	39400
490.169406340053	15.5	1.3379669601865976	0.06451612903225806	0.0	30	3	PDLIM1	protein_coding	2	false	0.693720409036216	ENSG00000107438	9124	2.3333333333333335	1	0.276869316672111	0	false	0	ENSG00000107438	7890810
85.0873231165587	16.0	0.006891094225934158	0.0625	0.0	31	2	RANBP1	protein_coding	1	false	-0.130076623640221	ENSG00000099901	5902	2.0	1	0.816030320215474	0	false	0	ENSG00000099901	40641
547.694539030062	12.5	0.03848472907339445	0.08	0.0	24	6	CNOT8	protein_coding	5	false	0.213778729708251	ENSG00000155508	9337	1.8333333333333333	1	0.573131194068587	0	false	0	ENSG00000155508	226968
268.56582843818	13.0	0.0	0.07692307692307693	0.0	25	1	GADD45B	protein_coding	0	false	1.20934885897741	ENSG00000099860	4616	6.0	1	0.014163368841818	0	false	0	ENSG00000099860	0
1128.11338882251	1.5	0.0	0.6666666666666666	0.0	2	1	HNRNPM	protein_coding	0	false	-1.12379496059692	ENSG00000099783	4670	10.0	1	0.0454909287304928	0	false	0	ENSG00000099783	0
63.6324197587723	4.0	0.03866158031420175	0.25	0.0	7	5	TSPYL4	protein_coding	4	false	-0.16746064048449	ENSG00000187189	23270	2.0	1	0.764000217430851	0	false	0	ENSG00000187189	228011
206.06529180131	4.5	0.0	0.2222222222222222	0.0	8	1	IFT74	protein_coding	0	false	-2.04941234136574	ENSG00000096872	80173	5.0	1	0.00320430444595058	0	false	0	ENSG00000096872	0
190.805398569848	3.0	0.004467062261810374	0.3333333333333333	0.0	5	2	ITGB3BP	protein_coding	1	false	-0.799385039939453	ENSG00000142856	23421	4.0	1	0.312041819888517	0	false	0	ENSG00000142856	26345
32.7144445983053	3.5	0.004906731741593038	0.2857142857142857	0.0	6	4	EFHC1	protein_coding	3	false	0.159901374474188	ENSG00000096093	114327	1.25	1	0.86660427466204	0	false	0	ENSG00000096093	28938
1154.84653708424	13.0	0.0	0.07692307692307693	0.0	25	1	SRPK1	protein_coding	0	false	1.06695155321376	ENSG00000096063	6732	10.0	1	0.0359993198551544	0	false	0	ENSG00000096063	0
171.042239509621	21.0	0.11534702520274308	0.047619047619047616	0.0	41	3	IKBKE	protein_coding	2	false	0.0692952098239666	ENSG00000263528	9641	6.0	1	0.942576176251965	0	false	0	ENSG00000263528	680272
2519.34625852888	21.5	0.0	0.046511627906976744	0.0	42	1	FKBP5	protein_coding	0	false	2.01596400738732	ENSG00000096060	2289	3.0	1	0.0133879210798901	0	false	0	ENSG00000096060	0
96.5516209942502	7.0	0.005653983341053973	0.14285714285714285	0.0	13	3	CCDC12	protein_coding	2	false	0.0270749945298563	ENSG00000160799	151903	2.0	1	0.980553947564036	0	false	0	ENSG00000160799	33345
199.626796885372	7.5	0.004925722478860936	0.13333333333333333	0.0	14	2	CWF19L1	protein_coding	1	false	-0.208740905906535	ENSG00000095485	55280	2.0	1	0.635638044706833	0	false	0	ENSG00000095485	29050
203.896196622719	9.5	0.0	0.10526315789473684	0.0	18	1	TBC1D2	protein_coding	0	false	1.09131755051563	ENSG00000095383	55357	5.0	1	0.00342674595468088	0	false	0	ENSG00000095383	0
524.596049300219	4.0	0.011773070185017259	0.25	0.0	7	5	PA2G4	protein_coding	4	false	-0.574399646907913	ENSG00000170515	5036	2.4	1	0.617230437304752	0	false	0	ENSG00000170515	69433
127.330565922242	4.5	0.0014514349197607438	0.2222222222222222	0.0	8	2	NANS	protein_coding	1	false	-0.190850798248391	ENSG00000095380	54187	3.0	1	0.81964669698371	0	false	0	ENSG00000095380	8560
20659.8068441605	2.0	0.04589620341249984	0.5	0.0	3	12	HLA-B	protein_coding	11	false	0.526303867579491	ENSG00000234745	3106	1.5833333333333333	1	0.27187694842213	0	false	0	ENSG00000234745	270678
512.737877102875	2.5	0.0	0.4	0.0	4	1	SH2D3C	protein_coding	0	false	1.02947816386956	ENSG00000095370	10044	12.0	1	0.0344133122382909	0	false	0	ENSG00000095370	0
14.6691489636083	8.5	0.0011774257106096503	0.11764705882352941	0.0	16	2	METAP1D	protein_coding	1	false	0.226007008159006	ENSG00000172878	254042	2.5	1	0.870795936972399	0	false	0	ENSG00000172878	6944
366.903753082299	9.0	0.0	0.1111111111111111	0.0	17	1	CRAT	protein_coding	0	false	-1.72290922544509	ENSG00000095321	1384	2.0	1	0.0267243024637392	0	false	0	ENSG00000095321	0
1609.96202650104	2.0	0.0	0.5	0.0	3	1	PTGS1	protein_coding	0	false	1.55934974946488	ENSG00000095303	5742	293.0	1	0.0125750303460569	0	false	0	ENSG00000095303	0
[truncated: 432 more rows]
