# Supplementary material for: Buffy Coat Transcriptomic Analysis Reveals Alterations in Host Cell Protein Synthesis and Cell Cycle in Severe COVID-19 Patients
Source: Int J Mol Sci. 2022 Nov 5;23(21):13588. doi: 10.3390/ijms232113588 (PMC9659271; doi:10.3390/ijms232113588)
Supplement: Supplementary file 1 [file ijms-23-13588-s001.zip › Table S3.ods]

## Sheet: Table S3
Table S3. Centrality scores of the interactive network connecting FBL to all upregulated DEGs.
abundance	AverageShortestPathLength	BetweennessCentrality	ClosenessCentrality	ClusteringCoefficient	Eccentricity	EdgeCount	Gene name	Gene Type	Indegree	IsSingleNode	log2fc	name	NCBI Gene ID	NeighborhoodConnectivity	Outdegree	padj	PartnerOfMultiEdgedNodePairs	selected	SelfLoops	shared name	Stress
7.50156506109646	7.0	0.02338337696568182	0.14285714285714285	0.0	13	2	IGLC7	IG_C_gene	1	false	1.12552371832577	ENSG00000211685		3.5	1	0.519074611471409	0	false	0	ENSG00000211685	78780
1847.98645158753	6.5	5.805773717297999E-4	0.15384615384615385	0.0	12	2	IGHA1	IG_C_gene	1	false	0.943503352042934	ENSG00000211895		2.5	1	0.619568586014879	0	false	0	ENSG00000211895	1956
13.6416192111059	4.5	0.0	0.2222222222222222	0.0	8	1	IGKV2D-29	IG_V_gene	0	false	3.44434550199436	ENSG00000243264		2.0	1	0.0350603900505586	0	false	0	ENSG00000243264	0
17.0780565021469	4.5	0.08478091811959418	0.2222222222222222	0.0	8	2	IGKV1D-13	IG_V_gene	1	false	-0.627472199141419	ENSG00000276566		2.5	1	0.816738287250557	0	false	0	ENSG00000276566	285632
31.5422803823774	2.0	0.0	0.5	0.0	3	1	AL160272.1	lncRNA	0	false	2.48939677824555	ENSG00000284977		11.0	1	0.0199329752981146	0	false	0	ENSG00000284977	0
88.5566651968034	2.0	0.0	0.5	0.0	3	1	AC215522.2	lncRNA	0	false	1.56738284286564	ENSG00000282572		6.0	1	0.00418377821870628	0	false	0	ENSG00000282572	0
42.231501217105	2.0	0.0	0.5	0.0	3	1	NPTN-IT1	lncRNA	0	false	1.28045587321635	ENSG00000281183	101241892	7.0	1	0.0211610398309175	0	false	0	ENSG00000281183	0
154.156616310257	2.0	0.0	0.5	0.0	3	1	LINC01127	lncRNA	0	false	3.00561479068811	ENSG00000281162		12.0	1	5.95247765805504E-4	0	false	0	ENSG00000281162	0
9.69939432569989	2.0	0.0	0.5	0.0	3	1	AC079174.2	lncRNA	0	false	2.57282546930792	ENSG00000277715		12.0	1	0.0443217016122529	0	false	0	ENSG00000277715	0
56.4111436474147	2.5	0.0	0.4	0.0	4	1	AL117335.1	lncRNA	0	false	1.68934455161231	ENSG00000276649		5.0	1	0.0065437783879744	0	false	0	ENSG00000276649	0
24.7689819180619	2.0	0.0	0.5	0.0	3	1	AL442125.1	lncRNA	0	false	2.32532535533355	ENSG00000276248		12.0	1	0.0132434291571657	0	false	0	ENSG00000276248	0
2781.96931945013	2.0	0.0	0.5	0.0	3	1	MIR223HG	lncRNA	0	false	2.48710188354872	ENSG00000274536	115891964	13.0	1	0.00208685721667894	0	false	0	ENSG00000274536	0
44.4438387447647	2.0	0.0	0.5	0.0	3	1	AL035661.1	lncRNA	0	false	3.04973314161289	ENSG00000274173		12.0	1	0.0110448042869144	0	false	0	ENSG00000274173	0
147.59477073468	2.0	0.0	0.5	0.0	3	1	RAB33B-AS1	lncRNA	0	false	1.36308748047344	ENSG00000273247		9.0	1	0.0145424810093855	0	false	0	ENSG00000273247	0
132.294745182229	2.0	0.0	0.5	0.0	3	1	LINC02035	lncRNA	0	false	1.23967570908496	ENSG00000273033	100129550	2.0	1	0.0269001457503647	0	false	0	ENSG00000273033	0
113.651112011098	4.5	0.0	0.2222222222222222	0.0	8	1	AC083862.1	lncRNA	0	false	2.0632800535258	ENSG00000272941		3.0	1	6.47162027827495E-4	0	false	0	ENSG00000272941	0
28.5438280873457	2.0	0.0	0.5	0.0	3	1	AL021707.6	lncRNA	0	false	2.54025221534284	ENSG00000272669		6.0	1	0.0194143050328819	0	false	0	ENSG00000272669	0
16.3968871137459	2.0	0.0	0.5	0.0	3	1	AC005072.1	lncRNA	0	false	2.64570062349347	ENSG00000272219		2.0	1	0.00705314577595528	0	false	0	ENSG00000272219	0
25.2997022790276	1.0	0.0	1.0	0.0	1	1	AC136475.9	lncRNA	0	false	3.95073008149585	ENSG00000270972		27.0	1	0.00493600549344736	0	false	0	ENSG00000270972	0
46.2389305336701	2.5	0.0	0.4	0.0	4	1	AC010680.2	lncRNA	0	false	2.00063433174632	ENSG00000270574		2.0	1	0.0165453737351892	0	false	0	ENSG00000270574	0
31.1599320031676	2.5	0.0	0.4	0.0	4	1	AC099343.2	lncRNA	0	false	2.25445568756602	ENSG00000270426		2.0	1	0.0152123557196103	0	false	0	ENSG00000270426	0
66.2966887197016	2.0	0.0	0.5	0.0	3	1	AC009948.1	lncRNA	0	false	1.92673710235592	ENSG00000270277		3.0	1	0.0241756278063854	0	false	0	ENSG00000270277	0
7.68378113368875	2.0	0.0	0.5	0.0	3	1	AC104695.2	lncRNA	0	false	3.4510004261372	ENSG00000270210		2.0	1	0.0135951786325643	0	false	0	ENSG00000270210	0
86.9498002706304	2.0	0.0	0.5	0.0	3	1	KCNQ1OT1	lncRNA	0	false	1.20695700127562	ENSG00000269821	10984	17.0	1	0.016793143681884	0	false	0	ENSG00000269821	0
523.468640450578	3.0	0.0	0.3333333333333333	0.0	5	1	MIR23AHG	lncRNA	0	false	1.29378986222919	ENSG00000267519		13.0	1	0.0228376047131683	0	false	0	ENSG00000267519	0
15.9068508927475	2.0	0.0	0.5	0.0	3	1	AC138150.2	lncRNA	0	false	2.65634585028031	ENSG00000267288	105371795	6.0	1	0.0498978086424771	0	false	0	ENSG00000267288	0
29.6856896586467	1.5	0.0	0.6666666666666666	0.0	2	1	AC005306.1	lncRNA	0	false	1.80509794510866	ENSG00000267283		9.0	1	0.016713269364977	0	false	0	ENSG00000267283	0
55.9557933143117	1.5	0.0	0.6666666666666666	0.0	2	1	AC011472.2	lncRNA	0	false	2.08826486610204	ENSG00000267174		9.0	1	0.040110457433504	0	false	0	ENSG00000267174	0
159.703839497773	3.0	0.0	0.3333333333333333	0.0	5	1	FMNL1-DT	lncRNA	0	false	1.18844188303414	ENSG00000267121	339192	13.0	1	0.0201362471286569	0	false	0	ENSG00000267121	0
12.0686953596339	2.0	0.0	0.5	0.0	3	1	AC087289.1	lncRNA	0	false	3.32505533201459	ENSG00000266980		6.0	1	0.0120076941797914	0	false	0	ENSG00000266980	0
70.7858831797878	2.0	0.0	0.5	0.0	3	1	AC104564.5	lncRNA	0	false	1.72736074194017	ENSG00000265625		2.0	1	0.0243833782348996	0	false	0	ENSG00000265625	0
170.718862242798	3.0	0.0	0.3333333333333333	0.0	5	1	AC004687.1	lncRNA	0	false	1.45398506593398	ENSG00000265206		13.0	1	0.0105560794819681	0	false	0	ENSG00000265206	0
102.695638310169	12.0	0.0	0.08333333333333333	0.0	23	1	AC011933.2	lncRNA	0	false	1.34140384976815	ENSG00000264853		2.0	1	0.0148724516844125	0	false	0	ENSG00000264853	0
51.0104932919701	2.0	0.0	0.5	0.0	3	1	MMP25-AS1	lncRNA	0	false	1.58859228579975	ENSG00000261971		4.0	1	0.0106634885186351	0	false	0	ENSG00000261971	0
51.4607571695768	2.0	0.0	0.5	0.0	3	1	AC005632.3	lncRNA	0	false	1.78827798798584	ENSG00000261596		3.0	1	0.0199089240218491	0	false	0	ENSG00000261596	0
13.4612892490543	2.5	0.0	0.4	0.0	4	1	AC092368.3	lncRNA	0	false	2.08575852018606	ENSG00000261512		2.0	1	0.0381464811315356	0	false	0	ENSG00000261512	0
22.3752924259065	2.0	0.0	0.5	0.0	3	1	AC104964.2	lncRNA	0	false	1.73252512981278	ENSG00000261451		11.0	1	0.0122106623654058	0	false	0	ENSG00000261451	0
179.145045885021	1.5	0.0	0.6666666666666666	0.0	2	1	FAM157C	lncRNA	0	false	1.59133080619915	ENSG00000260528		9.0	1	4.95354088614978E-4	0	false	0	ENSG00000260528	0
29.3010775383697	2.0	0.0	0.5	0.0	3	1	AC087286.4	lncRNA	0	false	1.68130293490765	ENSG00000259453		7.0	1	0.0211645580212597	0	false	0	ENSG00000259453	0
19.4669833026236	2.0	0.0	0.5	0.0	3	1	TMC3-AS1	lncRNA	0	false	2.18634500609385	ENSG00000259343		3.0	1	0.0136659725748713	0	false	0	ENSG00000259343	0
125.284661366007	2.5	0.0	0.4	0.0	4	1	LINC02289	lncRNA	0	false	2.983996904319	ENSG00000258819	102724190	4.0	1	0.0368663319058158	0	false	0	ENSG00000258819	0
165.001618087273	2.0	0.0	0.5	0.0	3	1	LINC02207	lncRNA	0	false	4.27661000274089	ENSG00000258476		13.0	1	7.81491941266996E-5	0	false	0	ENSG00000258476	0
84.6788343143877	2.5	0.0	0.4	0.0	4	1	PLBD1-AS1	lncRNA	0	false	1.50086962321334	ENSG00000256751	101928290	2.0	1	0.0390786952086425	0	false	0	ENSG00000256751	0
16.559650883155	2.0	0.0	0.5	0.0	3	1	AC005840.2	lncRNA	0	false	2.86129991510808	ENSG00000256433		6.0	1	0.0228172682212656	0	false	0	ENSG00000256433	0
167.248153567856	1.0	0.0	1.0	0.0	1	1	AC092746.1	lncRNA	0	false	3.14919959064967	ENSG00000255801		27.0	1	0.0470381193955172	0	false	0	ENSG00000255801	0
44.3557998598289	2.0	0.0	0.5	0.0	3	1	AC136475.5	lncRNA	0	false	4.14278217435547	ENSG00000255328		3.0	1	0.00214192471626862	0	false	0	ENSG00000255328	0
98.8235352840215	1.5	0.0	0.6666666666666666	0.0	2	1	AP002807.1	lncRNA	0	false	1.90335071395801	ENSG00000255031		9.0	1	3.09759819441595E-4	0	false	0	ENSG00000255031	0
101.028430911662	4.5	0.0	0.2222222222222222	0.0	8	1	AC018607.1	lncRNA	0	false	1.67851546845867	ENSG00000254325		3.0	1	0.0208359926256166	0	false	0	ENSG00000254325	0
10.3751232778609	2.0	0.0	0.5	0.0	3	1	AC011676.1	lncRNA	0	false	2.59794633207903	ENSG00000253307		3.0	1	0.0242518789830316	0	false	0	ENSG00000253307	0
39.0056059227759	2.5	0.0	0.4	0.0	4	1	DENND3-AS1	lncRNA	0	false	1.85156002838881	ENSG00000253210	101927963	2.0	1	0.00146651965977734	0	false	0	ENSG00000253210	0
9.80714826449649	2.0	0.0	0.5	0.0	3	1	AC113398.2	lncRNA	0	false	3.94598657029391	ENSG00000251456		13.0	1	0.0221081864275817	0	false	0	ENSG00000251456	0
52.9084849743628	2.5	0.0	0.4	0.0	4	1	NUDT16-DT	lncRNA	0	false	2.20142653379425	ENSG00000250608	339874	2.0	1	0.00879935492137732	0	false	0	ENSG00000250608	0
37.6922072620894	2.0	0.0	0.5	0.0	3	1	AC020703.1	lncRNA	0	false	3.08006761912688	ENSG00000249309		13.0	1	0.00442609938366599	0	false	0	ENSG00000249309	0
19.0460845580683	1.0	0.0	1.0	0.0	1	1	LINC01093	lncRNA	0	false	3.43228922727392	ENSG00000249173	100506229	27.0	1	0.0245915601342422	0	false	0	ENSG00000249173	0
75.4249295601218	2.5	0.0	0.4	0.0	4	1	LINC02362	lncRNA	0	false	2.05898859081993	ENSG00000249096		4.0	1	0.0135788756324186	0	false	0	ENSG00000249096	0
34.272441951451	2.0	0.0	0.5	0.0	3	1	AC097534.1	lncRNA	0	false	2.90015018992494	ENSG00000248774		11.0	1	1.92476760923246E-4	0	false	0	ENSG00000248774	0
20.598762317402	2.5	0.0	0.4	0.0	4	1	AC105415.1	lncRNA	0	false	2.29163170846665	ENSG00000248516		2.0	1	0.0254223086406246	0	false	0	ENSG00000248516	0
56.2537109293168	1.5	0.0	0.6666666666666666	0.0	2	1	GASK1B-AS1	lncRNA	0	false	1.42833916662016	ENSG00000248429	285505	9.0	1	0.0323563181684178	0	false	0	ENSG00000248429	0
1355.11364679853	2.0	0.0	0.5	0.0	3	1	LUCAT1	lncRNA	0	false	1.79372065393531	ENSG00000248323	100505994	2.0	1	0.0287153277365042	0	false	0	ENSG00000248323	0
39.8820691500754	2.0	0.0	0.5	0.0	3	1	DNAJC3-DT	lncRNA	0	false	1.89445179095738	ENSG00000247400	100289274	2.0	1	0.00375607827092526	0	false	0	ENSG00000247400	0
31.800831105975	2.0	0.0	0.5	0.0	3	1	FBXO38-DT	lncRNA	0	false	2.01380796942912	ENSG00000247199	102546294	11.0	1	0.0344705926078376	0	false	0	ENSG00000247199	0
152.615822885494	4.0	0.0	0.25	0.0	7	1	UBR5-DT	lncRNA	0	false	1.98661137883242	ENSG00000246263		3.0	1	0.00885975098298248	0	false	0	ENSG00000246263	0
7.96259067972799	2.0	0.0	0.5	0.0	3	1	AC079760.2	lncRNA	0	false	4.37669630773232	ENSG00000243144		2.0	1	0.0458522065825738	0	false	0	ENSG00000243144	0
71.147878797725	2.0	0.0	0.5	0.0	3	1	FOXP1-IT1	lncRNA	0	false	1.47794886550508	ENSG00000242094		3.0	1	0.0102403783014738	0	false	0	ENSG00000242094	0
46.8303342070397	3.0	0.0	0.3333333333333333	0.0	5	1	AC112496.1	lncRNA	0	false	2.154446779254	ENSG00000241886		13.0	1	0.00394195710696174	0	false	0	ENSG00000241886	0
199.506540825999	2.0	0.0	0.5	0.0	3	1	AL157392.3	lncRNA	0	false	1.11405239127208	ENSG00000239665		5.0	1	0.0407797657877782	0	false	0	ENSG00000239665	0
133.938395902137	2.0	0.0	0.5	0.0	3	1	PSMD6-AS2	lncRNA	0	false	1.27399760742692	ENSG00000239653	100507062	9.0	1	0.0454335373688422	0	false	0	ENSG00000239653	0
137.071502700928	2.0	0.0	0.5	0.0	3	1	LINC01410	lncRNA	0	false	1.87653916363592	ENSG00000238113	103352539	3.0	1	0.0065437783879744	0	false	0	ENSG00000238113	0
69.2501784199609	2.0	0.0	0.5	0.0	3	1	AL391832.2	lncRNA	0	false	2.69889454311572	ENSG00000238005	101927851	3.0	1	0.00226863968664228	0	false	0	ENSG00000238005	0
32.1726778874837	2.5	0.0	0.4	0.0	4	1	KLF7-IT1	lncRNA	0	false	1.56383584351457	ENSG00000237892		5.0	1	0.0413642979794121	0	false	0	ENSG00000237892	0
107.024272009348	2.0	0.0	0.5	0.0	3	1	LINC00211	lncRNA	0	false	2.03861778436407	ENSG00000237803	101929559	4.0	1	0.0256031551930969	0	false	0	ENSG00000237803	0
569.393417244431	3.0	0.0	0.3333333333333333	0.0	5	1	TTN-AS1	lncRNA	0	false	1.43432932748849	ENSG00000237298		13.0	1	0.00208685721667894	0	false	0	ENSG00000237298	0
134.258301352218	1.0	0.0	1.0	0.0	1	1	AC007278.2	lncRNA	0	false	2.33861203047299	ENSG00000236525		27.0	1	0.00868562414213698	0	false	0	ENSG00000236525	0
108.910501205352	2.0	0.0	0.5	0.0	3	1	AC099811.1	lncRNA	0	false	1.84321019192873	ENSG00000236194		4.0	1	0.0022596291217227	0	false	0	ENSG00000236194	0
25.8962772925325	2.0	0.0	0.5	0.0	3	1	LINC01814	lncRNA	0	false	2.62171772995664	ENSG00000236008	101929567	11.0	1	0.0132716537944646	0	false	0	ENSG00000236008	0
21.9930792781597	3.0	0.0	0.3333333333333333	0.0	5	1	AC009495.3	lncRNA	0	false	2.09292046008381	ENSG00000235192		13.0	1	0.0356275955870242	0	false	0	ENSG00000235192	0
39.7043700414096	2.0	0.0	0.5	0.0	3	1	AL445524.1	lncRNA	0	false	1.77726526687119	ENSG00000233461		4.0	1	0.0323563181684178	0	false	0	ENSG00000233461	0
15.891849813742	2.5	0.0	0.4	0.0	4	1	LINC01762	lncRNA	0	false	3.28806935849827	ENSG00000233154	101929023	3.0	1	0.00341902450891842	0	false	0	ENSG00000233154	0
26.7474843451399	2.0	0.0	0.5	0.0	3	1	AC243772.2	lncRNA	0	false	3.35034947587796	ENSG00000233030		13.0	1	0.00701502000465194	0	false	0	ENSG00000233030	0
11.7640011371236	2.0	0.0	0.5	0.0	3	1	AL691447.2	lncRNA	0	false	2.49887698868048	ENSG00000232063		11.0	1	0.0208359926256166	0	false	0	ENSG00000232063	0
564.58498533436	2.0	0.0	0.5	0.0	3	1	LINC-PINT	lncRNA	0	false	1.22463769981305	ENSG00000231721	378805	9.0	1	0.0200361855764478	0	false	0	ENSG00000231721	0
25.9983254916433	2.0	0.0	0.5	0.0	3	1	CFAP58-DT	lncRNA	0	false	2.44073406865543	ENSG00000231233	100505869	12.0	1	0.0274288960255265	0	false	0	ENSG00000231233	0
22.9934615387628	2.0	0.0	0.5	0.0	3	1	ARHGAP26-IT1	lncRNA	0	false	1.82659285823864	ENSG00000230789	100874372	12.0	1	0.0100145452541984	0	false	0	ENSG00000230789	0
12.0577488368129	3.0	0.0	0.3333333333333333	0.0	5	1	LINC01001	lncRNA	0	false	2.56683686963155	ENSG00000230724		13.0	1	0.0438919402718756	0	false	0	ENSG00000230724	0
9.09600614181177	1.0	0.0	1.0	0.0	1	1	AL049651.1	lncRNA	0	false	3.26835365845273	ENSG00000230492	101929707	27.0	1	0.045057057703467	0	false	0	ENSG00000230492	0
36.458842631512	1.5	0.0	0.6666666666666666	0.0	2	1	U73166.1	lncRNA	0	false	2.15049479504713	ENSG00000230454		9.0	1	0.0228155207064548	0	false	0	ENSG00000230454	0
65.761411268315	3.0	0.0	0.3333333333333333	0.0	5	1	NFE4	lncRNA	0	false	2.44719232834193	ENSG00000230257	58160	2.0	1	0.0254223086406246	0	false	0	ENSG00000230257	0
15.3599424619254	3.0	0.0	0.3333333333333333	0.0	5	1	AL021707.3	lncRNA	0	false	2.90053595340552	ENSG00000230149		13.0	1	0.00392991811891092	0	false	0	ENSG00000230149	0
144.825805247956	2.0	0.0	0.5	0.0	3	1	MIR646HG	lncRNA	0	false	1.64752258174039	ENSG00000228340	284757	11.0	1	0.00444774124251216	0	false	0	ENSG00000228340	0
78.9386396598513	4.0	0.0	0.25	0.0	7	1	LINC01359	lncRNA	0	false	2.27397723287783	ENSG00000226891	101927084	3.0	1	0.00741314855698834	0	false	0	ENSG00000226891	0
18.3636892001745	1.5	0.0	0.6666666666666666	0.0	2	1	AL021707.1	lncRNA	0	false	3.43849801592989	ENSG00000225450		9.0	1	0.00211844843273977	0	false	0	ENSG00000225450	0
37.5280968079979	2.5	0.0	0.4	0.0	4	1	AL390066.2	lncRNA	0	false	2.12492418564342	ENSG00000224950		3.0	1	0.0186091133122774	0	false	0	ENSG00000224950	0
430.892935937968	2.0	0.0	0.5	0.0	3	1	PELATON	lncRNA	0	false	1.79734601008695	ENSG00000224397	100506115	4.0	1	0.0132434291571657	0	false	0	ENSG00000224397	0
179.144931815968	2.0	0.0	0.5	0.0	3	1	CYTOR	lncRNA	0	false	1.17962533307241	ENSG00000222041	112597	9.0	1	0.00364688962108495	0	false	0	ENSG00000222041	0
52.3985018220864	2.0	0.0	0.5	0.0	3	1	ARHGAP27P1-BPTFP1-KPNA2P3	lncRNA	0	false	1.39666064851271	ENSG00000215769	109286553	17.0	1	0.0376944491704238	0	false	0	ENSG00000215769	0
162.41711467366	2.0	0.0	0.5	0.0	3	1	LINC02649	lncRNA	0	false	2.88394100562088	ENSG00000215244	399715	11.0	1	4.59910857975715E-4	0	false	0	ENSG00000215244	0
8.04644622367579	2.0	0.0	0.5	0.0	3	1	AC004540.1	lncRNA	0	false	3.55895347481142	ENSG00000214870	441204	11.0	1	0.026161293757474	0	false	0	ENSG00000214870	0
22.6935156225916	2.5	0.0	0.4	0.0	4	1	LINC00671	lncRNA	0	false	2.85987309849464	ENSG00000213373	388387	5.0	1	0.0498833913118869	0	false	0	ENSG00000213373	0
72.58578144192	1.5	0.0	0.6666666666666666	0.0	2	1	LINC02656	lncRNA	0	false	3.36647851524462	ENSG00000212743		2.0	1	0.00107805344282154	0	false	0	ENSG00000212743	0
361.00625687782	2.0	0.0	0.5	0.0	3	1	HCG27	lncRNA	0	false	1.83826071071559	ENSG00000206344	253018	6.0	1	0.0167475284908625	0	false	0	ENSG00000206344	0
8.40756242876142	8.5	0.8278629647438751	0.11764705882352941	0.0	16	2	FAM153CP	lncRNA	1	false	-0.254840903278512	ENSG00000204677	653316	2.0	1	0.899890453876126	0	false	0	ENSG00000204677	2789120
88.1705365333259	2.0	0.0	0.5	0.0	3	1	LINC01270	lncRNA	0	false	2.36323278322221	ENSG00000203999	284751	6.0	1	0.0185685139278219	0	false	0	ENSG00000203999	0
71.6807016222512	2.0	0.0	0.5	0.0	3	1	PRDX6-AS1	lncRNA	0	false	1.23976118902363	ENSG00000203739	101928673	5.0	1	0.0346613970512998	0	false	0	ENSG00000203739	0
49.6477325219306	2.0	0.0	0.5	0.0	3	1	LINC00862	lncRNA	0	false	2.47466724898284	ENSG00000203721	554279	11.0	1	0.0114577924713176	0	false	0	ENSG00000203721	0
800.775631723096	3.0	0.0	0.3333333333333333	0.0	5	1	MIR29B2CHG	lncRNA	0	false	1.5176611699257	ENSG00000203709		13.0	1	0.00777320713623869	0	false	0	ENSG00000203709	0
43.3611789876789	2.0	0.0	0.5	0.0	3	1	MIRLET7BHG	lncRNA	0	false	1.24545711404745	ENSG00000197182	400931	188.0	1	0.0158043641200381	0	false	0	ENSG00000197182	0
112.273627843089	12.0	0.021722973173526144	0.08333333333333333	0.0	23	2	AC107959.4	lncRNA	1	false	1.05546697933056	ENSG00000284948	254896	2.5	1	0.214949483020882	0	false	0	ENSG00000284948	73186
77728.1593814676	1.0	4.5947534327082327E-4	1.0	0.0	1	2	MALAT1	lncRNA	1	false	0.601523160459483	ENSG00000251562	378938	14.0	1	0.152519622739178	0	false	0	ENSG00000251562	1548
20.6142966458957	4.0	0.0	0.25	0.0	7	1	LINC02363	lncRNA	0	false	2.26462440896068	ENSG00000180712	728175	2.0	1	0.0256818154735221	0	false	0	ENSG00000180712	0
62.0267466041056	2.5	0.0	0.4	0.0	4	1	LINC02908	lncRNA	0	false	1.60633386006895	ENSG00000180539	401563	2.0	1	0.0243356857881736	0	false	0	ENSG00000180539	0
778.645808437263	2.0	0.0	0.5	0.0	3	1	PCBP1-AS1	lncRNA	0	false	1.21776784624338	ENSG00000179818	400960	9.0	1	0.0331386113397734	0	false	0	ENSG00000179818	0
306.904541191936	2.0	0.0	0.5	0.0	3	1	MIR4435-2HG	lncRNA	0	false	1.02654104394012	ENSG00000172965	541471	9.0	1	0.0135757083090072	0	false	0	ENSG00000172965	0
12.4020831778815	8.0	0.13058983811508254	0.1250	0.0	15	2	C2orf27A	lncRNA	1	false	-0.885188568506557	ENSG00000287151		2.0	1	0.508426139912695	0	false	0	ENSG00000287151	439965
10.6643463335984	1.0	0.24285498032092037	1.0	0.0	1	3	AC007952.4	lncRNA	2	false	-0.531633389305505	ENSG00000262202		16.666666666666668	1	0.738752713532585	0	false	0	ENSG00000262202	818193
54.8259712228451	2.0	7.782586240672472E-4	0.5	0.0	3	2	BAZ1A-AS1	lncRNA	1	false	0.78751298683187	ENSG00000258738	112268124	9.0	1	0.309075185044756	0	false	0	ENSG00000258738	2622
11.0209953113613	2.0	0.01800413171626507	0.5	0.0	3	2	TMED2-DT	lncRNA	1	false	0.372993315966357	ENSG00000247373		15.0	1	0.775174399668789	0	false	0	ENSG00000247373	60657
12.7738838151085	1.0	0.0017773503588538048	1.0	0.0	1	2	AC020978.6	lncRNA	1	false	-0.224249528616647	ENSG00000262514		15.5	1	0.908031956760918	0	false	0	ENSG00000262514	5988
22.6736534471992	1.0	0.0037307142051492105	1.0	0.0	1	5	AC139530.1	lncRNA	4	false	-0.72699950185108	ENSG00000262049		7.2	1	0.461209034928866	0	false	0	ENSG00000262049	12569
31113.3160318877	4.0	0.00970092548069788	0.25	0.0	7	5	NEAT1	lncRNA	4	false	2.82936686904481	ENSG00000245532	283131	2.6	1	6.47148926488259E-7	0	false	0	ENSG00000245532	32683
56.9353325233941	1.0	0.0019064664921372727	1.0	0.0	1	2	AC087741.1	lncRNA	1	false	0.817881008340836	ENSG00000262580		16.0	1	0.382492874006237	0	false	0	ENSG00000262580	6423
100.198078268832	2.0	0.0	0.5	0.0	3	1	RN7SL600P	misc_RNA	0	false	2.36878844160232	ENSG00000274963		13.0	1	0.0040432485656312	0	false	0	ENSG00000274963	0
16.435304145451	2.0	0.0	0.5	0.0	3	1	RN7SL683P	misc_RNA	0	false	2.99721004155058	ENSG00000242330		6.0	1	0.0298004254779924	0	false	0	ENSG00000242330	0
22.5380072987363	2.0	0.0	0.5	0.0	3	1	RN7SL288P	misc_RNA	0	false	1.73208790430278	ENSG00000240767		13.0	1	0.0315056232536342	0	false	0	ENSG00000240767	0
19.376303168454	2.0	0.0	0.5	0.0	3	1	RN7SKP97	misc_RNA	0	false	4.10330525248914	ENSG00000222898		12.0	1	0.00403689438490884	0	false	0	ENSG00000222898	0
28.1633051253903	2.0	0.0	0.5	0.0	3	1	RN7SKP16	misc_RNA	0	false	2.25913471783857	ENSG00000222112		12.0	1	0.0218379397968414	0	false	0	ENSG00000222112	0
23.6432950430871	6.5	0.002696301045395451	0.15384615384615385	0.0	12	2	NAT8B	polymorphic_pseudogene	1	false	0.312312258432827	ENSG00000204872	51471	2.0	1	0.816376451326333	0	false	0	ENSG00000204872	9084
1	2.0	0.0	0.5	0.0	3	1	MTCYBP23	processed_pseudogene	0	false	2.46999541604415	ENSG00000259671		13.0	1	0.00693853419502472	0	false	0	ENSG00000259671	0
55.9380889559232	2.0	0.0	0.5	0.0	3	1	AC066616.2	processed_pseudogene	0	false	2.04421143583474	ENSG00000259600		13.0	1	0.0329468828730239	0	false	0	ENSG00000259600	0
53.6774243211667	2.0	0.0	0.5	0.0	3	1	MTND5P32	processed_pseudogene	0	false	2.07614986141097	ENSG00000259379		12.0	1	0.0229658805741733	0	false	0	ENSG00000259379	0
19.9083823855788	2.0	0.0	0.5	0.0	3	1	AC135626.1	processed_pseudogene	0	false	2.66102423285178	ENSG00000258632		13.0	1	0.0096033494006947	0	false	0	ENSG00000258632	0
50.00934266249	2.0	0.0	0.5	0.0	3	1	GOLGA5P1	processed_pseudogene	0	false	1.7485775646999	ENSG00000251215		13.0	1	0.00991041972179548	0	false	0	ENSG00000251215	0
29.1286356465999	2.0	0.0	0.5	0.0	3	1	DDX10P1	processed_pseudogene	0	false	2.05414964578812	ENSG00000237135		12.0	1	0.0446845592940242	0	false	0	ENSG00000237135	0
59.8296259556526	22.5	0.0	0.044444444444444446	0.0	44	1	DACH1	protein_coding	0	false	2.66981828928665	ENSG00000276644	1602	14.0	1	5.9741244942268E-4	0	false	0	ENSG00000276644	0
36.1266724188875	18.0	0.47796121173264944	0.05555555555555555	0.0	35	2	H3C6	protein_coding	1	false	-0.0201953089064999	ENSG00000274750	8353	3.0	1	0.99072227025377	0	false	0	ENSG00000274750	1610280
223.137120241942	19.0	0.0	0.05263157894736842	0.0	37	1	CD24	protein_coding	0	false	1.71351935826976	ENSG00000272398	100133941	2.0	1	0.0485827623415609	0	false	0	ENSG00000272398	0
136.369094558016	2.5	0.0	0.4	0.0	4	1	NBPF14	protein_coding	0	false	1.12355980833659	ENSG00000270629	25832	2.0	1	0.00401897174509924	0	false	0	ENSG00000270629	0
117.920100860989	4.0	0.0	0.25	0.0	7	1	STRADA	protein_coding	0	false	1.0593834020628	ENSG00000266173	92335	2.0	1	0.0231884927117477	0	false	0	ENSG00000266173	0
358.241361641201	17.0	0.0	0.058823529411764705	0.0	33	1	CCPG1	protein_coding	0	false	1.23107882057714	ENSG00000260916	9236	3.0	1	0.0156998156011272	0	false	0	ENSG00000260916	0
2049.55555780911	12.5	0.036323484888960124	0.08	0.0	24	2	PECAM1	protein_coding	1	false	0.317093656330238	ENSG00000261371	5175	2.0	1	0.664810315566428	0	false	0	ENSG00000261371	122376
75.9982814353024	6.5	0.0	0.15384615384615385	0.0	12	1	CLEC5A	protein_coding	0	false	1.37845781009257	ENSG00000258227	23601	2.0	1	0.0301637555101899	0	false	0	ENSG00000258227	0
214.09584402064	1.5	0.0	0.6666666666666666	0.0	2	1	MGAM2	protein_coding	0	false	3.78442226143018	ENSG00000257743	93432	2.0	1	9.11745364056333E-5	0	false	0	ENSG00000257743	0
4010.27181018451	2.5	0.0	0.4	0.0	4	1	MGAM	protein_coding	0	false	2.90712060722042	ENSG00000257335	8972	3.0	1	4.67460843070856E-4	0	false	0	ENSG00000257335	0
112.512185849056	7.5	0.0	0.13333333333333333	0.0	14	1	HP	protein_coding	0	false	2.73815628545234	ENSG00000257017	3240	2.0	1	0.0102403783014738	0	false	0	ENSG00000257017	0
47.5546510896022	16.5	0.0	0.06060606060606061	0.0	32	1	CLEC12B	protein_coding	0	false	2.10642576778036	ENSG00000256660	387837	3.0	1	0.0386954107874484	0	false	0	ENSG00000256660	0
228.337927690096	5.5	0.0	0.18181818181818182	0.0	10	1	SMIM3	protein_coding	0	false	1.17993422426856	ENSG00000256235	85027	2.0	1	0.0218333481240039	0	false	0	ENSG00000256235	0
67.7356863912368	5.5	0.0	0.18181818181818182	0.0	10	1	EBLN2	protein_coding	0	false	1.67569859578019	ENSG00000255423	55096	2.0	1	0.0113743417650853	0	false	0	ENSG00000255423	0
46.4260885115728	31.0	0.0	0.03225806451612903	0.0	61	1	CARD17	protein_coding	0	false	3.29513755439811	ENSG00000255221	440068	4.0	1	0.0304094134914215	0	false	0	ENSG00000255221	0
1587.4803493358	2.0	0.0	0.5	0.0	3	1	AP5B1	protein_coding	0	false	1.32067688011949	ENSG00000254470	91056	188.0	1	0.00315711932395819	0	false	0	ENSG00000254470	0
422.198043874645	20.0	0.0	0.05	0.0	39	1	NAIP	protein_coding	0	false	1.81033403100301	ENSG00000249437	4671	2.0	1	0.00214668065032925	0	false	0	ENSG00000249437	0
77.4954849028142	12.0	0.0	0.08333333333333333	0.0	23	1	ASPRV1	protein_coding	0	false	2.0977009101972	ENSG00000244617	151516	2.0	1	0.00693043043322125	0	false	0	ENSG00000244617	0
608.360127587666	5.0	0.0	0.2	0.0	9	1	LILRA6	protein_coding	0	false	1.6468381245703	ENSG00000244482	79168	2.0	1	0.00163506235890871	0	false	0	ENSG00000244482	0
557.198267347501	12.0	0.047023205285747355	0.08333333333333333	0.0	23	2	RBM12	protein_coding	1	false	0.270308510746834	ENSG00000244462	10137	2.0	1	0.359766046838428	0	false	0	ENSG00000244462	158424
185.846385967413	11.0	0.06470053961639151	0.09090909090909091	0.0	21	2	CORO7	protein_coding	1	false	0.397434915137315	ENSG00000262246	79585	2.0	1	0.510362546252375	0	false	0	ENSG00000262246	217980
9.73730024242322	11.5	0.056393177919063474	0.08695652173913043	0.0	22	2	CNTF	protein_coding	1	false	0.608317648810037	ENSG00000242689	1270	2.0	1	0.665733647085803	0	false	0	ENSG00000242689	189992
620.86760287645	14.5	0.0	0.06896551724137931	0.0	28	1	PISD	protein_coding	0	false	1.62332064571248	ENSG00000241878	23761	6.0	1	0.00879935492137732	0	false	0	ENSG00000241878	0
19.9764179499879	2.5	0.006658237015666091	0.4	0.0	4	2	YAE1	protein_coding	1	false	-0.220152854098951	ENSG00000241127	57002	4.0	1	0.856197398622809	0	false	0	ENSG00000241127	22432
42.6101036505374	2.5	0.05128314722801018	0.4	0.0	4	2	HLA-DQA2	protein_coding	1	false	-1.69169155790126	ENSG00000237541	3117	10.5	1	0.468837690782827	0	false	0	ENSG00000237541	172776
516.53330371207	28.5	0.0	0.03508771929824561	0.0	56	1	RGL2	protein_coding	0	false	1.28860820042925	ENSG00000237441	5863	2.0	1	0.00523310118553799	0	false	0	ENSG00000237441	0
19.1627464555394	8.5	0.0	0.11764705882352941	0.0	16	1	CLEC2L	protein_coding	0	false	2.33736209476073	ENSG00000236279	154790	2.0	1	0.0379715495415313	0	false	0	ENSG00000236279	0
1119.01169848485	1.5	0.0	0.6666666666666666	0.0	2	1	KIAA0040	protein_coding	0	false	1.39796575178568	ENSG00000235750	9674	2.0	1	0.0102850489513565	0	false	0	ENSG00000235750	0
1441.37548843237	5.5	0.0	0.18181818181818182	0.0	10	1	NFAM1	protein_coding	0	false	1.04682276908445	ENSG00000235568	150372	2.0	1	0.0194844629519351	0	false	0	ENSG00000235568	0
127.690130622237	21.5	0.0	0.046511627906976744	0.0	42	1	SLC26A6	protein_coding	0	false	1.56277472976176	ENSG00000225697	65010	9.0	1	0.00186377013769366	0	false	0	ENSG00000225697	0
672.897118575288	22.5	0.0	0.044444444444444446	0.0	44	1	CEBPD	protein_coding	0	false	1.17373609678861	ENSG00000221869	1052	14.0	1	0.0452943572023105	0	false	0	ENSG00000221869	0
135.197612271128	7.5	0.0	0.13333333333333333	0.0	14	1	CKLF	protein_coding	0	false	1.27857597792332	ENSG00000217555	51192	2.0	1	0.0487098062908547	0	false	0	ENSG00000217555	0
82.4190457090957	33.5	0.0	0.029850746268656716	0.0	66	1	NPEPL1	protein_coding	0	false	1.18807596756841	ENSG00000215440	79716	2.0	1	0.0147772138904919	0	false	0	ENSG00000215440	0
4839.31696694908	2.0	0.0015859022991576285	0.5	0.0	3	2	DDX3X	protein_coding	1	false	0.435185823146912	ENSG00000215301	1654	94.5	1	0.38643126456945	0	false	0	ENSG00000215301	5343
867.972014076019	21.5	0.0	0.046511627906976744	0.0	42	1	UBXN2B	protein_coding	0	false	1.55578802312452	ENSG00000215114	137886	2.0	1	0.00980272499168831	0	false	0	ENSG00000215114	0
580.714308483669	6.0	0.0	0.16666666666666666	0.0	11	1	ZSWIM8	protein_coding	0	false	1.07266068264313	ENSG00000214655	23053	5.0	1	4.88453647902197E-4	0	false	0	ENSG00000214655	0
59.2122066975339	5.5	0.0	0.18181818181818182	0.0	10	1	STARD10	protein_coding	0	false	1.37624191362351	ENSG00000214530	10809	2.0	1	0.047527209733446	0	false	0	ENSG00000214530	0
96.9434716098387	8.0	0.0	0.1250	0.0	15	1	PLIN5	protein_coding	0	false	1.89620613863554	ENSG00000214456	440503	2.0	1	0.00687029939008671	0	false	0	ENSG00000214456	0
158.400249266502	8.5	0.0	0.11764705882352941	0.0	16	1	IRF9	protein_coding	0	false	1.33576035606719	ENSG00000213928	10379	4.0	1	0.0364313042365166	0	false	0	ENSG00000213928	0
382.699320497601	2.5	0.0	0.4	0.0	4	1	LTB4R	protein_coding	0	false	1.52756534488231	ENSG00000213903	1241	2.0	1	0.00146910641847838	0	false	0	ENSG00000213903	0
187.852279620905	9.0	0.0	0.1111111111111111	0.0	17	1	DDAH2	protein_coding	0	false	1.99192555027689	ENSG00000213722	23564	5.0	1	2.87227705652939E-5	0	false	0	ENSG00000213722	0
232.972113689833	2.5	0.0	0.4	0.0	4	1	MXD3	protein_coding	0	false	1.9790194372421	ENSG00000213347	83463	3.0	1	0.00151499947069757	0	false	0	ENSG00000213347	0
17.408170755278	28.5	0.0	0.03508771929824561	0.0	56	1	DOK6	protein_coding	0	false	4.6594170813757	ENSG00000206052	220164	2.0	1	6.7027708843712E-4	0	false	0	ENSG00000206052	0
78.3537466764678	4.0	0.21298195935958397	0.25	0.0	7	2	RCC1L	protein_coding	1	false	-0.228954998292742	ENSG00000274523	81554	2.5	1	0.702938100612454	0	false	0	ENSG00000274523	717549
12.4158685730811	4.0	0.0	0.25	0.0	7	1	CPT1B	protein_coding	0	false	1.65141495781942	ENSG00000205560	1375	3.0	1	0.0283954157142561	0	false	0	ENSG00000205560	0
721.889960986358	2.5	0.0	0.4	0.0	4	1	CD177	protein_coding	0	false	6.0153484912835	ENSG00000204936	57126	4.0	1	9.11745364056333E-5	0	false	0	ENSG00000204936	0
32.4035390493918	7.0	0.3052032317619751	0.14285714285714285	0.0	13	2	TCTN1	protein_coding	1	false	-0.895629821856358	ENSG00000204852	79600	3.5	1	0.111890260240207	0	false	0	ENSG00000204852	1028248
250.128271667961	5.0	0.0	0.2	0.0	9	1	TBC1D8	protein_coding	0	false	1.44958874410691	ENSG00000204634	11138	3.0	1	5.32453102353087E-4	0	false	0	ENSG00000204634	0
83.9187552169454	10.5	0.9857883207779023	0.09523809523809523	0.0	20	2	TRIM39	protein_coding	1	false	0.631020532403533	ENSG00000204599	56658	2.5	1	0.330603722940945	0	false	0	ENSG00000204599	3321180
1216.987562519	4.5	0.004153087211269612	0.2222222222222222	0.0	8	2	LILRB3	protein_coding	1	false	1.76836959883262	ENSG00000204577		1.5	1	1.08494960025683E-4	0	false	0	ENSG00000204577	13992
13189.3922365695	2.0	0.0	0.5	0.0	3	1	HLA-C	protein_coding	0	false	1.13538245612227	ENSG00000204525	3107	188.0	1	0.029337838674116	0	false	0	ENSG00000204525	0
449.234629961158	2.0	0.0	0.5	0.0	3	1	HSPA1A	protein_coding	0	false	1.67467267611663	ENSG00000204389	3303	188.0	1	0.0127807345282917	0	false	0	ENSG00000204389	0
38.5902601449844	12.0	0.6598677375885261	0.08333333333333333	0.0	23	2	ZNF688	protein_coding	1	false	-0.510515514336807	ENSG00000229809	146542	4.0	1	0.394287532591823	0	false	0	ENSG00000229809	2223134
97.2563559401547	9.0	0.0	0.1111111111111111	0.0	17	1	AGER	protein_coding	0	false	1.18115272908818	ENSG00000204305	177	2.0	1	0.0235680234161749	0	false	0	ENSG00000204305	0
1024.74494703563	5.5	0.0	0.18181818181818182	0.0	10	1	NHSL2	protein_coding	0	false	1.37653411897677	ENSG00000204131		5.0	1	0.0116462811497265	0	false	0	ENSG00000204131	0
465.364162107026	2.0	0.0	0.5	0.0	3	1	GDI1	protein_coding	0	false	1.08879317891614	ENSG00000203879	2664	188.0	1	5.82226552536864E-4	0	false	0	ENSG00000203879	0
8.94183948941795	13.0	1.1631953720028732	0.07692307692307693	0.0	25	2	CENPW	protein_coding	1	false	0.0418880111463939	ENSG00000203760	387103	4.0	1	0.986065086651289	0	false	0	ENSG00000203760	3918875
2145.71959224919	16.5	0.0	0.06060606060606061	0.0	32	1	CR1	protein_coding	0	false	2.09181651979628	ENSG00000203710	1378	2.0	1	1.11918713167762E-4	0	false	0	ENSG00000203710	0
733.034263696864	21.0	0.0	0.047619047619047616	0.0	41	1	GK	protein_coding	0	false	1.71400114692632	ENSG00000198814	2710	9.0	1	0.00605271756437013	0	false	0	ENSG00000198814	0
308.892628475714	12.0	0.10118044795877781	0.08333333333333333	0.0	23	2	C19orf38	protein_coding	1	false	0.857864289095521	ENSG00000214212	255809	4.5	1	0.122178193066568	0	false	0	ENSG00000214212	340883
28.2853906771552	7.0	0.0	0.14285714285714285	0.0	13	1	PLXNB3	protein_coding	0	false	3.52417813882335	ENSG00000198753	5365	3.0	1	0.00674910837150255	0	false	0	ENSG00000198753	0
916.274446931103	10.0	0.0	0.1	0.0	19	1	MSRB1	protein_coding	0	false	1.99929707940671	ENSG00000198736	51734	2.0	1	0.00186798024033439	0	false	0	ENSG00000198736	0
725.170931619987	33.0	0.0	0.030303030303030304	0.0	65	1	F5	protein_coding	0	false	2.08174623356166	ENSG00000198734	2153	3.0	1	1.92476760923246E-4	0	false	0	ENSG00000198734	0
186.885712447746	5.5	0.0	0.18181818181818182	0.0	10	1	TAFA2	protein_coding	0	false	1.88428265655462	ENSG00000198673	338811	2.0	1	5.71741947003404E-4	0	false	0	ENSG00000198673	0
386.79975911564	5.0	0.0	0.2	0.0	9	1	NUDT16	protein_coding	0	false	1.33910236420998	ENSG00000198585	131870	2.0	1	0.031460230297826	0	false	0	ENSG00000198585	0
1128.76618311727	2.0	0.0	0.5	0.0	3	1	ASPH	protein_coding	0	false	1.99635225369089	ENSG00000198363	444	188.0	1	0.00107490974970882	0	false	0	ENSG00000198363	0
461.09029322376	4.5	0.0	0.2222222222222222	0.0	8	1	CSF2RA	protein_coding	0	false	1.48081348567207	ENSG00000198223	1438	2.0	1	0.00146344883503993	0	false	0	ENSG00000198223	0
131.411102331801	4.0	0.0	0.25	0.0	7	1	CACNA1E	protein_coding	0	false	3.20348189876876	ENSG00000198216	777	3.0	1	2.91447746220906E-4	0	false	0	ENSG00000198216	0
84.8944890570265	18.5	0.01750280493668857	0.05405405405405406	0.0	36	2	SH2D1B	protein_coding	1	false	-0.409248543552363	ENSG00000198574	117157	3.5	1	0.698668919845845	0	false	0	ENSG00000198574	58968
1055.8762024341	19.0	0.0	0.05263157894736842	0.0	37	1	SIRPA	protein_coding	0	false	1.46211749684739	ENSG00000198053	140885	2.0	1	0.00567016079407533	0	false	0	ENSG00000198053	0
178.195495834145	20.0	0.0	0.05	0.0	39	1	FCGR1B	protein_coding	0	false	2.18159221536367	ENSG00000198019	2210	2.0	1	0.00217832125101096	0	false	0	ENSG00000198019	0
112.592632865518	2.0	0.0	0.5	0.0	3	1	ENTPD7	protein_coding	0	false	1.12051696041298	ENSG00000198018	57089	188.0	1	0.0419681850056811	0	false	0	ENSG00000198018	0
24.117415610066	2.5	0.2419416691896256	0.4	0.0	4	3	ZNF2	protein_coding	2	false	0.111081976775026	ENSG00000275111	7549	4.666666666666667	1	0.922624579599573	0	false	0	ENSG00000275111	815116
1057.16756942341	2.0	0.0	0.5	0.0	3	1	PLCG2	protein_coding	0	false	1.15691819360853	ENSG00000197943	5336	188.0	1	0.0151002569296371	0	false	0	ENSG00000197943	0
637.685806972301	23.0	0.0	0.043478260869565216	0.0	45	1	CYRIA	protein_coding	0	false	1.06444058008366	ENSG00000197872	81553	2.0	1	0.0296684705063739	0	false	0	ENSG00000197872	0
383.370828453761	3.5	0.0	0.2857142857142857	0.0	6	1	SLC9A8	protein_coding	0	false	1.14993302000446	ENSG00000197818	23315	2.0	1	0.00503648904646032	0	false	0	ENSG00000197818	0
60.2943814827273	8.0	0.03251500418514363	0.1250	0.0	15	2	KLHL14	protein_coding	1	false	0.248239702181527	ENSG00000197705	57565	4.0	1	0.879164982600998	0	false	0	ENSG00000197705	109545
441.207462837376	5.0	0.10890901319655927	0.2	0.0	9	2	TRIM10	protein_coding	1	false	-1.54681866356967	ENSG00000204613	10107	2.0	1	0.169362112439496	0	false	0	ENSG00000204613	366921
87.9896743798339	2.5	0.0	0.4	0.0	4	1	ELANE	protein_coding	0	false	3.62597635705826	ENSG00000197561	1991	2.0	1	0.00688634445926667	0	false	0	ENSG00000197561	0
934.542749896374	2.0	0.0	0.5	0.0	3	1	SIPA1L1	protein_coding	0	false	1.0030684819151	ENSG00000197555	26037	188.0	1	0.0339705880527506	0	false	0	ENSG00000197555	0
436.249392720469	4.0	0.0	0.25	0.0	7	1	ATG7	protein_coding	0	false	1.24296131439478	ENSG00000197548	10533	9.0	1	0.00145108596937226	0	false	0	ENSG00000197548	0
74.4040769974909	2.5	0.0	0.4	0.0	4	1	VEPH1	protein_coding	0	false	1.42290287046128	ENSG00000197415	79674	2.0	1	0.0379715495415313	0	false	0	ENSG00000197415	0
1310.23627121666	16.5	0.0	0.06060606060606061	0.0	32	1	PELI1	protein_coding	0	false	1.28964181565137	ENSG00000197329	57162	4.0	1	0.028610438842216	0	false	0	ENSG00000197329	0
1051.84262608722	2.0	0.0	0.5	0.0	3	1	SVIL	protein_coding	0	false	1.68487978857516	ENSG00000197321	6840	188.0	1	1.83893704729848E-4	0	false	0	ENSG00000197321	0
3721.50314729398	6.5	0.0	0.15384615384615385	0.0	12	1	SERPINA1	protein_coding	0	false	1.3999653987402	ENSG00000197249	5265	4.0	1	0.0135951786325643	0	false	0	ENSG00000197249	0
5986.64489671055	2.0	0.0	0.5	0.0	3	1	IGF2R	protein_coding	0	false	1.37845518704716	ENSG00000197081	3482	188.0	1	0.00274911100611523	0	false	0	ENSG00000197081	0
162.316294587418	16.0	0.0	0.0625	0.0	31	1	ARRDC1	protein_coding	0	false	1.03622683331551	ENSG00000197070	92714	2.0	1	0.0383734748298908	0	false	0	ENSG00000197070	0
235.717537221148	21.0	0.20660273191928905	0.047619047619047616	0.0	41	2	MAFG	protein_coding	1	false	1.33225926449881	ENSG00000197063	4097	2.0	1	0.0182906843632035	0	false	0	ENSG00000197063	696057
424.906118722892	4.0	0.0	0.25	0.0	7	1	PDLIM7	protein_coding	0	false	1.3588366085509	ENSG00000196923	9260	9.0	1	0.00196228232045887	0	false	0	ENSG00000196923	0
791.69563017383	2.0	0.0	0.5	0.0	3	1	TECPR2	protein_coding	0	false	1.62927763957364	ENSG00000196663	9895	188.0	1	0.00847771077549744	0	false	0	ENSG00000196663	0
20.6512794308909	12.5	0.011162757564424497	0.08	0.0	24	2	XRCC2	protein_coding	1	false	0.639355004914934	ENSG00000196584	7516	2.0	1	0.659619808375225	0	false	0	ENSG00000196584	37608
96.582443448981	2.5	0.04981211376467026	0.4	0.0	4	3	C1orf174	protein_coding	2	false	-0.0820584274873502	ENSG00000198912	339448	1.6666666666666667	1	0.913375172984852	0	false	0	ENSG00000198912	167820
54.0504553874917	3.0	0.0	0.3333333333333333	0.0	5	1	PRTN3	protein_coding	0	false	6.05053835392796	ENSG00000196415	5657	3.0	1	0.00455129414048648	0	false	0	ENSG00000196415	0
467.22523400026	13.5	0.0	0.07407407407407407	0.0	26	1	NTNG2	protein_coding	0	false	2.44266745198705	ENSG00000196358	84628	2.0	1	2.11467377779586E-4	0	false	0	ENSG00000196358	0
26.8931174342046	3.0	0.0	0.3333333333333333	0.0	5	1	NLGN3	protein_coding	0	false	2.39024621509849	ENSG00000196338	54413	4.0	1	0.00991041972179548	0	false	0	ENSG00000196338	0
633.790307690342	22.0	0.0	0.045454545454545456	0.0	43	1	SEMA4A	protein_coding	0	false	1.25402238626317	ENSG00000196189	64218	2.0	1	0.0133601059756742	0	false	0	ENSG00000196189	0
733.623634919159	30.0	0.0	0.03333333333333333	0.0	59	1	IL1RAP	protein_coding	0	false	1.62566985555397	ENSG00000196083	3556	2.0	1	0.040343221021164	0	false	0	ENSG00000196083	0
59.9445853547486	5.0	0.0	0.2	0.0	9	1	KAZN	protein_coding	0	false	2.62419865339217	ENSG00000189337	23254	2.0	1	0.00354771231364768	0	false	0	ENSG00000189337	0
584.111215814473	4.0	0.02154399149911251	0.25	0.0	7	3	LIN54	protein_coding	2	false	-1.10452616425858	ENSG00000189308	132660	3.3333333333333335	1	0.0355008600653873	0	false	0	ENSG00000189308	72583
50.5088653296383	2.0	0.0	0.5	0.0	3	1	BTBD8	protein_coding	0	false	1.38305475416625	ENSG00000189195	284697	188.0	1	0.0437298338742765	0	false	0	ENSG00000189195	0
136.224500462063	28.0	0.0	0.03571428571428571	0.0	55	1	TMEM120A	protein_coding	0	false	1.36096717099221	ENSG00000189077	83862	6.0	1	0.00822828286863514	0	false	0	ENSG00000189077	0
3395.54367562392	7.0	0.0	0.14285714285714285	0.0	13	1	LITAF	protein_coding	0	false	1.20980772774002	ENSG00000189067	9516	5.0	1	0.0372654561596976	0	false	0	ENSG00000189067	0
96.3586094984286	7.5	0.0	0.13333333333333333	0.0	14	1	KCTD21	protein_coding	0	false	1.17864698729299	ENSG00000188997	283219	4.0	1	0.0406900828404546	0	false	0	ENSG00000188997	0
7158.48045537547	4.0	0.0	0.25	0.0	7	1	LRRK2	protein_coding	0	false	1.55774252080083	ENSG00000188906	120892	9.0	1	0.0395662140255718	0	false	0	ENSG00000188906	0
1818.23255767065	6.0	0.0	0.16666666666666666	0.0	11	1	MSL1	protein_coding	0	false	1.23048703172926	ENSG00000188895	339287	2.0	1	0.0235680234161749	0	false	0	ENSG00000188895	0
429.37746280243	2.0	0.0	0.5	0.0	3	1	MTF1	protein_coding	0	false	1.74731675775274	ENSG00000188786	4520	188.0	1	0.00114917908097459	0	false	0	ENSG00000188786	0
1720.18274289521	2.0	0.0	0.5	0.0	3	1	DPYD	protein_coding	0	false	1.07349595267446	ENSG00000188641	1806	188.0	1	0.00364688962108495	0	false	0	ENSG00000188641	0
18.7135373353754	11.0	1.0251170949760466	0.09090909090909091	0.0	21	2	ZNF658	protein_coding	1	false	0.580877906990083	ENSG00000274349	26149	2.0	1	0.660061634086833	0	false	0	ENSG00000274349	3453681
1513.435609763	2.0	0.0	0.5	0.0	3	1	RALGAPA2	protein_coding	0	false	1.98527102098263	ENSG00000188559	57186	188.0	1	1.51579172719293E-5	0	false	0	ENSG00000188559	0
494.916900192028	24.5	0.058271446634966424	0.04081632653061224	0.0	48	2	BRK1	protein_coding	1	false	-0.148171876910204	ENSG00000254999	55845	2.5	1	0.810635424841254	0	false	0	ENSG00000254999	196320
6448.05584962653	6.0	0.0	0.16666666666666666	0.0	11	1	SELL	protein_coding	0	false	1.28289298839916	ENSG00000188404	6402	2.0	1	0.0301294505611547	0	false	0	ENSG00000188404	0
181.804933007978	25.0	0.0	0.04	0.0	49	1	C3orf62	protein_coding	0	false	1.63794205257866	ENSG00000188315	375341	2.0	1	0.0165309275810828	0	false	0	ENSG00000188315	0
748.899012534476	4.5	0.0	0.2222222222222222	0.0	8	1	PLSCR1	protein_coding	0	false	1.9918694439566	ENSG00000188313	5359	8.0	1	4.95354088614978E-4	0	false	0	ENSG00000188313	0
129.801698831746	4.5	0.0	0.2222222222222222	0.0	8	1	PEAK3	protein_coding	0	false	1.85757142946902	ENSG00000188305	374872	5.0	1	0.0189171724452818	0	false	0	ENSG00000188305	0
36.6562300655854	5.0	0.004749692792648395	0.2	0.0	9	2	CLEC17A	protein_coding	1	false	0.0744308191448598	ENSG00000187912	388512	1.5	1	0.970420371909075	0	false	0	ENSG00000187912	16002
45.6773279499831	9.0	0.05417801998183469	0.1111111111111111	0.0	17	3	RNASEK	protein_coding	2	false	0.538460068905541	ENSG00000219200	440400	2.3333333333333335	1	0.356880660796683	0	false	0	ENSG00000219200	182529
425.475379296279	3.0	0.0	0.3333333333333333	0.0	5	1	TLR5	protein_coding	0	false	2.48969618659188	ENSG00000187554	7100	3.0	1	1.29270900387669E-4	0	false	0	ENSG00000187554	0
1558.42756945302	3.0	0.45254907897158253	0.3333333333333333	0.0	5	2	PTMA	protein_coding	1	false	-0.601898953035083	ENSG00000187514	5757	4.5	1	0.0294365656693333	0	false	0	ENSG00000187514	1524665
35.8638437034768	3.5	0.03571619383448202	0.2857142857142857	0.0	6	2	NFKBIL1	protein_coding	1	false	0.20908300520539	ENSG00000204498	4795	3.0	1	0.853689505123824	0	false	0	ENSG00000204498	120330
1055.27914168967	3.5	0.0	0.2857142857142857	0.0	6	1	LILRA5	protein_coding	0	false	2.20941358496634	ENSG00000187116	353514	3.0	1	0.00342674595468088	0	false	0	ENSG00000187116	0
8941.74898398799	12.5	0.09429573827714555	0.08	0.0	24	3	MT-CO1	protein_coding	2	false	-0.217901994445658	ENSG00000198804	4512	1.6666666666666667	1	0.736217739045324	0	false	0	ENSG00000198804	317688
201.255202228635	13.0	0.0	0.07692307692307693	0.0	25	1	GPR141	protein_coding	0	false	1.92864395063668	ENSG00000187037	353345	3.0	1	5.95247765805504E-4	0	false	0	ENSG00000187037	0
1193.35627389862	2.5	0.0	0.4	0.0	4	1	CYP4F3	protein_coding	0	false	2.0536831200176	ENSG00000186529	4051	2.0	1	0.0130412183747937	0	false	0	ENSG00000186529	0
535.657210961647	5.0	0.0	0.2	0.0	9	1	FCAR	protein_coding	0	false	2.1272513583271	ENSG00000186431	2204	2.0	1	1.96510987092969E-4	0	false	0	ENSG00000186431	0
14.5472964818712	6.5	0.018510801232391228	0.15384615384615385	0.0	12	2	KLRC3	protein_coding	1	false	-0.260546525222792	ENSG00000205810	3823	3.0	1	0.907139834785269	0	false	0	ENSG00000205810	62364
61.6765097843056	10.5	0.00936759808373849	0.09523809523809523	0.0	20	2	SLC25A29	protein_coding	1	false	0.0522739004985122	ENSG00000197119	123096	2.5	1	0.9625885404176	0	false	0	ENSG00000197119	31560
373.529242382061	11.0	0.0	0.09090909090909091	0.0	21	1	MTARC1	protein_coding	0	false	2.59131096335088	ENSG00000186205	64757	2.0	1	2.5543824622694E-4	0	false	0	ENSG00000186205	0
137.518557080879	2.5	0.0	0.4	0.0	4	1	KLHDC8B	protein_coding	0	false	2.00040991339741	ENSG00000185909	200942	2.0	1	0.0135951786325643	0	false	0	ENSG00000185909	0
70.8356558644051	4.5	0.007997482977447715	0.2222222222222222	0.0	8	2	ATP6V0C	protein_coding	1	false	-1.43665517460139	ENSG00000185883	527	12.0	1	0.13274387948267	0	false	0	ENSG00000185883	26944
327.655955275755	10.0	0.0	0.1	0.0	19	1	TRIM69	protein_coding	0	false	1.23648245682395	ENSG00000185880	140691	4.0	1	0.0333080312821471	0	false	0	ENSG00000185880	0
1191.99630755217	8.0	0.0	0.1250	0.0	15	1	ZFP36L1	protein_coding	0	false	1.04600439982321	ENSG00000185650	677	3.0	1	0.0376944491704238	0	false	0	ENSG00000185650	0
514.466723238575	22.5	0.0	0.044444444444444446	0.0	44	1	IRF7	protein_coding	0	false	1.77833943348487	ENSG00000185507	3665	14.0	1	0.0203732029896912	0	false	0	ENSG00000185507	0
166.733875441665	3.5	0.0	0.2857142857142857	0.0	6	1	GAS2L1	protein_coding	0	false	1.47134288926124	ENSG00000185340	10634	13.0	1	0.0234483104367178	0	false	0	ENSG00000185340	0
76.7843832863233	10.5	0.0	0.09523809523809523	0.0	20	1	TCN2	protein_coding	0	false	1.78112244614776	ENSG00000185339	6948	3.0	1	0.0219756089987427	0	false	0	ENSG00000185339	0
245.615857967282	2.0	0.0	0.5	0.0	3	1	KIAA0825	protein_coding	0	false	1.73828735941395	ENSG00000185261	285600	188.0	1	0.00951968272340711	0	false	0	ENSG00000185261	0
454.649793052981	2.0	0.0	0.5	0.0	3	1	ZNF445	protein_coding	0	false	1.48004268424805	ENSG00000185219	353274	188.0	1	0.00163898589365106	0	false	0	ENSG00000185219	0
4901.97630056046	3.5	0.0	0.2857142857142857	0.0	6	1	IFITM2	protein_coding	0	false	1.99533892499883	ENSG00000185201	10581	2.0	1	0.021336538559062	0	false	0	ENSG00000185201	0
1351.6548210004	2.0	0.1942387490872825	0.5	0.0	3	2	RPL14	protein_coding	1	false	-1.07487527325102	ENSG00000188846	9045	10.5	1	0.00576667533196827	0	false	0	ENSG00000188846	654402
97.5726046555914	5.5	0.0	0.18181818181818182	0.0	10	1	SLC24A3	protein_coding	0	false	1.5158540880309	ENSG00000185052	57419	2.0	1	0.0156490529457494	0	false	0	ENSG00000185052	0
2867.58881697448	13.0	0.026223931897918114	0.07692307692307693	0.0	25	2	ITGB3	protein_coding	1	false	2.48953064427954	ENSG00000259207	3690	3.5	1	0.00195925948837529	0	false	0	ENSG00000259207	88350
417.595325243804	16.0	0.0	0.0625	0.0	31	1	SEMA4B	protein_coding	0	false	1.25599658658222	ENSG00000185033	10509	7.0	1	0.00720042797783792	0	false	0	ENSG00000185033	0
209.063439937219	16.0	0.046089710483042744	0.0625	0.0	31	3	LRIG2	protein_coding	2	false	-0.220383461304487	ENSG00000198799	9860	3.6666666666666665	1	0.733137845990087	0	false	0	ENSG00000198799	155279
2231.90307597215	8.0	0.0	0.1250	0.0	15	1	FMNL1	protein_coding	0	false	1.00254805176408	ENSG00000184922	752	2.0	1	0.0185685139278219	0	false	0	ENSG00000184922	0
722.76218312115	7.0	0.0	0.14285714285714285	0.0	13	1	SOCS3	protein_coding	0	false	1.78940843848526	ENSG00000184557	9021	4.0	1	0.00120575090011968	0	false	0	ENSG00000184557	0
10.5020218328504	2.5	0.0	0.4	0.0	4	1	A3GALT2	protein_coding	0	false	3.01738836160589	ENSG00000184389	127550	3.0	1	0.0421056789336934	0	false	0	ENSG00000184389	0
102.953711019093	2.0	0.0	0.5	0.0	3	1	CSF1	protein_coding	0	false	2.21631137870686	ENSG00000184371	1435	188.0	1	0.00129089280407268	0	false	0	ENSG00000184371	0
192.070788815746	19.5	1.3575875763566099	0.05128205128205128	0.0	38	2	COMMD6	protein_coding	1	false	-0.770332511099131	ENSG00000188243	170622	4.0	1	0.106272100610917	0	false	0	ENSG00000188243	4573794
83.8101213776133	2.0	0.0238918273939912	0.5	0.0	3	3	TSPYL2	protein_coding	2	false	0.166628204573072	ENSG00000184205	64061	6.666666666666667	1	0.908156661779891	0	false	0	ENSG00000184205	80493
84.1721289250667	5.0	0.004391729443821125	0.2	0.0	9	2	CRELD2	protein_coding	1	false	-0.288658231960707	ENSG00000184164	79174	1.5	1	0.648524405158008	0	false	0	ENSG00000184164	14796
1493.61282063254	2.0	0.0	0.5	0.0	3	1	DENND5A	protein_coding	0	false	1.17916177311097	ENSG00000184014	23258	188.0	1	0.00705314577595528	0	false	0	ENSG00000184014	0
377.240749889185	3.0	0.009659964500483814	0.3333333333333333	0.0	5	2	ATXN7L3B	protein_coding	1	false	-0.315167444364467	ENSG00000253719	552889	4.5	1	0.317219363961459	0	false	0	ENSG00000253719	32545
2207.86997030028	3.5	0.008826200780039536	0.2857142857142857	0.0	6	2	PTP4A2	protein_coding	1	false	-0.0647248085503417	ENSG00000184007	8073	3.0	1	0.908691633820929	0	false	0	ENSG00000184007	29736
153.044997133954	13.5	0.67104118062605	0.07407407407407407	0.0	26	2	KMT5A	protein_coding	1	false	-0.812105648262547	ENSG00000183955	387893	3.5	1	0.128459018368635	0	false	0	ENSG00000183955	2260778
13.71315977921	5.5	0.0	0.18181818181818182	0.0	10	1	SCN5A	protein_coding	0	false	4.531803286282	ENSG00000183873	6331	2.0	1	0.0235680234161749	0	false	0	ENSG00000183873	0
511.949550225631	1.5	0.0	0.6666666666666666	0.0	2	1	KREMEN1	protein_coding	0	false	1.90070982308526	ENSG00000183762	83999	2.0	1	0.0158140014980343	0	false	0	ENSG00000183762	0
457.114350824257	8.0	0.0	0.1250	0.0	15	1	UPP1	protein_coding	0	false	1.62702936792642	ENSG00000183696	7378	2.0	1	3.22613979931652E-5	0	false	0	ENSG00000183696	0
59.7068389177445	17.5	0.025037844383893428	0.05714285714285714	0.0	34	2	MZT1	protein_coding	1	false	-0.381338658757366	ENSG00000204899	440145	2.0	1	0.660553467126422	0	false	0	ENSG00000204899	84354
19.6701224815905	10.5	0.049883350251999074	0.09523809523809523	0.0	20	2	CCL3L3	protein_coding	1	false	0.573476630028431	ENSG00000276085		2.0	1	0.770872680273844	0	false	0	ENSG00000276085	168060
43.5572554452501	11.0	0.04275346832647682	0.09090909090909091	0.0	21	2	CCR3	protein_coding	1	false	1.02879403461797	ENSG00000183625	1232	2.5	1	0.441730046340834	0	false	0	ENSG00000183625	144039
262.911151863124	5.5	0.0	0.18181818181818182	0.0	10	1	ZNF438	protein_coding	0	false	1.22838096533566	ENSG00000183621	220929	5.0	1	0.0234839817387044	0	false	0	ENSG00000183621	0
61.9675943060274	16.5	0.5948721601871144	0.06060606060606061	0.0	32	2	MRPL54	protein_coding	1	false	-0.27371912957474	ENSG00000183617	116541	3.0	1	0.852607922651424	0	false	0	ENSG00000183617	2004160
33.8705615381664	6.0	0.05116916884828409	0.16666666666666666	0.0	11	4	SFXN4	protein_coding	3	false	-0.552024628767206	ENSG00000183605	119559	2.5	1	0.594442450144309	0	false	0	ENSG00000183605	172392
77.5987399916584	11.5	1.0638759772755604	0.08695652173913043	0.0	22	2	NDOR1	protein_coding	1	false	0.807106060644545	ENSG00000188566	27158	2.0	1	0.0676234428274934	0	false	0	ENSG00000188566	3584262
1368.03476590781	13.0	0.0	0.07692307692307693	0.0	25	1	MX2	protein_coding	0	false	1.46890036365861	ENSG00000183486	4600	6.0	1	0.0237460115056184	0	false	0	ENSG00000183486	0
54.928176814788	20.0	0.2184493597620701	0.05	0.0	39	2	GTF2H2C	protein_coding	1	false	0.271881622485276	ENSG00000183474	728340	3.5	1	0.682968579241151	0	false	0	ENSG00000183474	735969
87.1271801013335	2.5	0.0	0.4	0.0	4	1	TMEM121B	protein_coding	0	false	1.54637330460835	ENSG00000183307	27439	2.0	1	0.0282208151538439	0	false	0	ENSG00000183307	0
60.4361283271641	27.0	0.2857764480300143	0.037037037037037035	0.0	53	2	SMDT1	protein_coding	1	false	-0.412840256171035	ENSG00000183172	91689	5.5	1	0.441109759581131	0	false	0	ENSG00000183172	962798
29.1379116017205	15.5	0.0	0.06451612903225806	0.0	30	1	GAS6	protein_coding	0	false	1.65553111303189	ENSG00000183087	2621	4.0	1	0.0274294298855779	0	false	0	ENSG00000183087	0
226.352169417154	9.0	0.0	0.1111111111111111	0.0	17	1	MCEMP1	protein_coding	0	false	3.12169061160019	ENSG00000183019	199675	2.0	1	9.07095083373497E-5	0	false	0	ENSG00000183019	0
1016.5720501023	2.0	0.004549340172036117	0.5	0.0	3	4	EWSR1	protein_coding	3	false	0.267044059263416	ENSG00000182944	2130	47.75	1	0.22837950642469	0	false	0	ENSG00000182944	15327
871.616139487134	4.5	0.0	0.2222222222222222	0.0	8	1	ADGRG3	protein_coding	0	false	2.35236826869138	ENSG00000182885	222487	2.0	1	4.17434143028478E-4	0	false	0	ENSG00000182885	0
1731.30774426007	27.0	0.0	0.037037037037037035	0.0	53	1	LIMK2	protein_coding	0	false	2.09970112176932	ENSG00000182541	3985	2.0	1	1.29270900387669E-4	0	false	0	ENSG00000182541	0
164.876521316962	22.5	0.019968774673054204	0.044444444444444446	0.0	44	2	SMURF1	protein_coding	1	false	0.482788797416498	ENSG00000198742	57154	7.5	1	0.209476855749627	0	false	0	ENSG00000198742	67276
610.714595534056	23.0	0.0	0.043478260869565216	0.0	45	1	FES	protein_coding	0	false	1.38925555154775	ENSG00000182511	2242	2.0	1	7.85584773609406E-4	0	false	0	ENSG00000182511	0
168.711130767692	2.0	0.0	0.5	0.0	3	1	EXT1	protein_coding	0	false	1.44256815006252	ENSG00000182197	2131	10.0	1	0.00163506235890871	0	false	0	ENSG00000182197	0
180.422615716244	10.0	0.6720206823268211	0.1	0.0	19	2	ARHGAP19	protein_coding	1	false	0.838595337471219	ENSG00000213390	84986	6.0	1	0.0957014486873202	0	false	0	ENSG00000213390	2264078
1672.74221592496	2.0	0.0	0.5	0.0	3	1	CHST15	protein_coding	0	false	1.51429099696773	ENSG00000182022	51363	188.0	1	0.00601003020657826	0	false	0	ENSG00000182022	0
17.9265913070822	3.5	0.0	0.2857142857142857	0.0	6	1	OR52K2	protein_coding	0	false	3.13536534574577	ENSG00000181963	119774	5.0	1	0.0498722176390574	0	false	0	ENSG00000181963	0
161.00300703723	18.5	0.0	0.05405405405405406	0.0	36	1	MACIR	protein_coding	0	false	1.83293003195698	ENSG00000181751	90355	2.0	1	0.0399265257928412	0	false	0	ENSG00000181751	0
637.388678702129	18.5	0.04733664582999412	0.05405405405405406	0.0	36	2	RAP2B	protein_coding	1	false	-0.187306556535025	ENSG00000181467	5912	2.5	1	0.635308320115817	0	false	0	ENSG00000181467	159480
2466.14587701991	8.5	0.0	0.11764705882352941	0.0	16	1	DDX60L	protein_coding	0	false	1.61134701999892	ENSG00000181381	91351	2.0	1	0.00514974437755525	0	false	0	ENSG00000181381	0
1311.92224950085	26.5	0.0	0.03773584905660377	0.0	52	1	FRAT2	protein_coding	0	false	1.30833002077266	ENSG00000181274	23401	6.0	1	0.0306587547465834	0	false	0	ENSG00000181274	0
499.504908588021	1.5	0.0	0.6666666666666666	0.0	2	1	ZNF746	protein_coding	0	false	1.01227142145832	ENSG00000181220	155061	7.0	1	0.0152123557196103	0	false	0	ENSG00000181220	0
34.045765624179	2.0	0.0014505529732328898	0.5	0.0	3	2	FKRP	protein_coding	1	false	-0.0612210337210287	ENSG00000181027	79147	5.5	1	0.947745826819558	0	false	0	ENSG00000181027	4887
24.0018966143557	22.0	0.0	0.045454545454545456	0.0	43	1	LSMEM1	protein_coding	0	false	2.46003317054176	ENSG00000181016	286006	2.0	1	0.03062071646531	0	false	0	ENSG00000181016	0
78.2643517685119	2.5	0.0	0.4	0.0	4	1	ST20	protein_coding	0	false	2.11532765571586	ENSG00000180953	400410	4.0	1	0.00750136533251601	0	false	0	ENSG00000180953	0
22.604458776824	6.0	0.0	0.16666666666666666	0.0	11	1	OXTR	protein_coding	0	false	2.3135566015422	ENSG00000180914	5021	2.0	1	0.0409289436879716	0	false	0	ENSG00000180914	0
52.5670728339315	15.5	0.014425388684083986	0.06451612903225806	0.0	30	2	CUEDC1	protein_coding	1	false	0.536666753803861	ENSG00000180891	404093	2.0	1	0.486226164204338	0	false	0	ENSG00000180891	48600
84.8679011642182	25.0	0.037509275584287606	0.04	0.0	49	2	BLOC1S5	protein_coding	1	false	-0.515217630175695	ENSG00000188428	63915	2.0	1	0.547025895662708	0	false	0	ENSG00000188428	126371
94.2307526278464	2.5	0.0	0.4	0.0	4	1	FUT7	protein_coding	0	false	1.43721821237235	ENSG00000180549	2529	2.0	1	0.0468123701607041	0	false	0	ENSG00000180549	0
144.345503703596	29.5	0.0	0.03389830508474576	0.0	58	1	KCNE1	protein_coding	0	false	2.80995435377576	ENSG00000180509	3753	3.0	1	7.94649903718737E-5	0	false	0	ENSG00000180509	0
37.8062282602913	5.5	0.0	0.18181818181818182	0.0	10	1	PNPLA1	protein_coding	0	false	2.57173757299619	ENSG00000180316	285848	2.0	1	0.00201191913376412	0	false	0	ENSG00000180316	0
563.954737878307	4.5	0.0	0.2222222222222222	0.0	8	1	ABCA13	protein_coding	0	false	3.62089941259215	ENSG00000179869	154664	3.0	1	4.95354088614978E-4	0	false	0	ENSG00000179869	0
604.473317958118	5.0	0.010765614147566382	0.2	0.0	9	2	ZBTB18	protein_coding	1	false	1.01105072891773	ENSG00000179456	10472	4.0	1	0.036731687648875	0	false	0	ENSG00000179456	36270
102.669569011521	23.0	0.0	0.043478260869565216	0.0	45	1	NSUN7	protein_coding	0	false	2.77236108705975	ENSG00000179299	79730	2.0	1	0.00211844843273977	0	false	0	ENSG00000179299	0
64.8487364831053	11.5	0.04685936136489109	0.08695652173913043	0.0	22	3	EDC3	protein_coding	2	false	-0.0305390476561085	ENSG00000179151	80153	2.6666666666666665	1	0.971472918508578	0	false	0	ENSG00000179151	157872
854.979087319215	21.5	0.0	0.046511627906976744	0.0	42	1	CYBC1	protein_coding	0	false	1.32204576260087	ENSG00000178927	79415	9.0	1	1.08494960025683E-4	0	false	0	ENSG00000178927	0
99.5052357419307	2.5	0.0	0.4	0.0	4	1	OPLAH	protein_coding	0	false	2.65302399270007	ENSG00000178814	26873	2.0	1	1.83893704729848E-4	0	false	0	ENSG00000178814	0
1120.7161694553	4.5	0.0039013849560411507	0.2222222222222222	0.0	8	2	KCTD12	protein_coding	1	false	0.123490270889117	ENSG00000178695	115207	3.0	1	0.876818040203938	0	false	0	ENSG00000178695	13144
301.940266702387	2.0	0.0013330127691403536	0.5	0.0	3	2	H2BC9	protein_coding	1	false	-0.590134352379728	ENSG00000275713	8345	94.5	1	0.469206493696858	0	false	0	ENSG00000275713	4491
50.8172090006048	2.5	0.0	0.4	0.0	4	1	CEP295NL	protein_coding	0	false	1.46701505289375	ENSG00000178404	100653515	2.0	1	0.0126154454527711	0	false	0	ENSG00000178404	0
264.015369139442	4.5	0.48695125643354525	0.2222222222222222	0.0	8	2	ASB8	protein_coding	1	false	0.174132661574108	ENSG00000177981	140461	2.5	1	0.735905301692222	0	false	0	ENSG00000177981	1640568
346.86183781914	2.5	0.0	0.4	0.0	4	1	CD151	protein_coding	0	false	1.82009999523353	ENSG00000177697	977	8.0	1	0.00406669713657492	0	false	0	ENSG00000177697	0
545.165281423898	2.0	0.0	0.5	0.0	3	1	AGTRAP	protein_coding	0	false	1.55781805885195	ENSG00000177674	57085	6.0	1	0.00364688962108495	0	false	0	ENSG00000177674	0
3230.1393987294	3.5	0.0	0.2857142857142857	0.0	6	1	IL17RA	protein_coding	0	false	1.36027422282965	ENSG00000177663	23765	3.0	1	0.00163506235890871	0	false	0	ENSG00000177663	0
201.830904961454	8.0	0.0	0.1250	0.0	15	1	GBA	protein_coding	0	false	1.41908902073317	ENSG00000177628	2629	4.0	1	5.71741947003404E-4	0	false	0	ENSG00000177628	0
39.1805940082662	20.5	0.22078561972775787	0.04878048780487805	0.0	40	2	PIDD1	protein_coding	1	false	0.0759013366068358	ENSG00000177595	55367	2.0	1	0.945409876677385	0	false	0	ENSG00000177595	743840
234.554650428894	4.5	0.10067852754180691	0.2222222222222222	0.0	8	2	ZBTB33	protein_coding	1	false	-0.33074556852196	ENSG00000177485	10009	2.0	1	0.503992537402899	0	false	0	ENSG00000177485	339192
1488.16181170592	4.5	0.0	0.2222222222222222	0.0	8	1	SAMD9L	protein_coding	0	false	1.79330659193747	ENSG00000177409	219285	3.0	1	0.0154127653522838	0	false	0	ENSG00000177409	0
140.176133379349	10.5	0.0	0.09523809523809523	0.0	20	1	B3GNT8	protein_coding	0	false	1.61345423676209	ENSG00000177191	374907	3.0	1	0.0219756089987427	0	false	0	ENSG00000177191	0
2480.517786536	7.0	0.03882566650638457	0.14285714285714285	0.0	13	2	TALDO1	protein_coding	1	false	-0.0627290360409794	ENSG00000177156	6888	2.5	1	0.939979245926141	0	false	0	ENSG00000177156	130806
575.096297166066	5.0	0.0	0.2	0.0	9	1	ZBTB34	protein_coding	0	false	1.24141454867462	ENSG00000177125	403341	5.0	1	0.0211645580212597	0	false	0	ENSG00000177125	0
24.9079057529684	13.0	0.012681578838014164	0.07692307692307693	0.0	25	2	PHETA1	protein_coding	1	false	-0.117894127613981	ENSG00000198324	144717	2.0	1	0.929654965906055	0	false	0	ENSG00000198324	42725
56.1894674336072	21.5	0.018899040088333242	0.046511627906976744	0.0	42	2	TMEM80	protein_coding	1	false	-0.102139028558816	ENSG00000177042	283232	5.0	1	0.918902189815673	0	false	0	ENSG00000177042	63672
41.1306110338783	4.0	0.017772909951143643	0.25	0.0	7	2	SHMT1	protein_coding	1	false	-0.239159583299938	ENSG00000176974	6470	2.5	1	0.798194033031122	0	false	0	ENSG00000176974	59878
31.7051672783224	8.0	0.6067211625794732	0.1250	0.0	15	2	TYMS	protein_coding	1	false	-0.0476998170903948	ENSG00000176890	7298	5.0	1	0.978204656743904	0	false	0	ENSG00000176890	2044080
739.029276989887	2.0	0.0	0.5	0.0	3	1	BASP1	protein_coding	0	false	1.69775555184695	ENSG00000176788	10409	188.0	1	0.0405340436460045	0	false	0	ENSG00000176788	0
446.31466569874	8.0	0.0	0.1250	0.0	15	1	SLCO3A1	protein_coding	0	false	1.04569821914134	ENSG00000176463	28232	2.0	1	0.007981374011699	0	false	0	ENSG00000176463	0
6.79229847899608	21.5	0.1083827536464177	0.046511627906976744	0.0	42	2	MAGIX	protein_coding	1	false	0.801255335704645	ENSG00000269313	79917	4.5	1	0.675252160686409	0	false	0	ENSG00000269313	365148
145.04931834684	14.5	0.0374739541593204	0.06896551724137931	0.0	28	2	TMEM39A	protein_coding	1	false	0.260238286649272	ENSG00000176142	55254	5.0	1	0.626974370600172	0	false	0	ENSG00000176142	126252
53.1281201988803	2.5	0.0	0.4	0.0	4	1	LRRN1	protein_coding	0	false	2.49290289242485	ENSG00000175928	57633	2.0	1	7.72859877339993E-4	0	false	0	ENSG00000175928	0
9.36712143669922	12.0	0.07431687176838643	0.08333333333333333	0.0	23	3	SFN	protein_coding	2	false	1.02123202788079	ENSG00000175793	2810	3.6666666666666665	1	0.583646503457067	0	false	0	ENSG00000175793	250378
107.957390776275	2.0	0.0	0.5	0.0	3	1	B3GNTL1	protein_coding	0	false	1.57151080421362	ENSG00000175711	146712	7.0	1	0.00344665320850616	0	false	0	ENSG00000175711	0
147.842253389425	15.0	0.05149151395344695	0.06666666666666667	0.0	29	3	TOM1L2	protein_coding	2	false	-0.0904965581133826	ENSG00000175662	146691	2.3333333333333335	1	0.879324185898134	0	false	0	ENSG00000175662	173478
738.016016376688	2.5	0.0	0.4	0.0	4	1	MCTP1	protein_coding	0	false	1.44704894137801	ENSG00000175471	79772	5.0	1	0.00168088669617464	0	false	0	ENSG00000175471	0
334.163273340626	8.0	0.3386805221634521	0.1250	0.0	15	2	CTC1	protein_coding	1	false	0.0189355987197903	ENSG00000178971	80169	4.0	1	0.975225582946738	0	false	0	ENSG00000178971	1141035
252.902142892696	5.0	0.0	0.2	0.0	9	1	TP53I11	protein_coding	0	false	1.51132575400966	ENSG00000175274	9537	9.0	1	5.71741947003404E-4	0	false	0	ENSG00000175274	0
556.555217600704	24.0	0.10189429692555192	0.041666666666666664	0.0	47	3	ULK1	protein_coding	2	false	0.890745591011012	ENSG00000177169	8408	2.3333333333333335	1	0.0896521990144915	0	false	0	ENSG00000177169	343288
43.0769721297954	7.0	0.0	0.14285714285714285	0.0	13	1	SLC22A1	protein_coding	0	false	2.31071910645885	ENSG00000175003	6580	2.0	1	0.00842409269649963	0	false	0	ENSG00000175003	0
25.2086032287212	19.5	0.0	0.05128205128205128	0.0	38	1	ADCY6	protein_coding	0	false	2.41895704514606	ENSG00000174233	112	7.0	1	0.0444234333495181	0	false	0	ENSG00000174233	0
588.341083614823	4.0	0.0	0.25	0.0	7	1	SELP	protein_coding	0	false	1.72270127908925	ENSG00000174175	6403	2.0	1	0.0371565136430959	0	false	0	ENSG00000174175	0
812.460451788926	15.5	0.0	0.06451612903225806	0.0	30	1	TLR6	protein_coding	0	false	1.46275003445285	ENSG00000174130	10333	4.0	1	0.0261096884792595	0	false	0	ENSG00000174130	0
78.4679334573165	9.0	0.3634877384196185	0.1111111111111111	0.0	17	2	NAXD	protein_coding	1	false	0.350210921585627	ENSG00000213995	55739	5.0	1	0.685444786748885	0	false	0	ENSG00000213995	1224612
70.3252326530535	19.5	0.0	0.05128205128205128	0.0	38	1	GNG5	protein_coding	0	false	1.32739480743301	ENSG00000174021	2787	7.0	1	0.0127017046328514	0	false	0	ENSG00000174021	0
191.641044974731	5.5	0.0	0.18181818181818182	0.0	10	1	SLCO4C1	protein_coding	0	false	1.14903077927329	ENSG00000173930	353189	2.0	1	0.0496580470331379	0	false	0	ENSG00000173930	0
1900.00150343043	18.5	0.0	0.05405405405405406	0.0	36	1	STAT5B	protein_coding	0	false	1.13838090485285	ENSG00000173757	6777	6.0	1	0.00512649162461775	0	false	0	ENSG00000173757	0
1257.47211705532	6.0	0.0	0.16666666666666666	0.0	11	1	AGFG1	protein_coding	0	false	1.08055139241655	ENSG00000173744	3267	2.0	1	0.0195130929149796	0	false	0	ENSG00000173744	0
420.037997137099	5.0	0.0	0.2	0.0	9	1	SLC19A1	protein_coding	0	false	1.46437134094351	ENSG00000173638	6573	7.0	1	0.00445994242275883	0	false	0	ENSG00000173638	0
1276.47179645447	4.5	0.0	0.2222222222222222	0.0	8	1	SULT1B1	protein_coding	0	false	2.17494668088456	ENSG00000173597	27284	2.0	1	0.00576667533196827	0	false	0	ENSG00000173597	0
2924.63192739535	3.5	0.0	0.2857142857142857	0.0	6	1	NABP1	protein_coding	0	false	1.80630419958403	ENSG00000173559	64859	5.0	1	0.00801295082694778	0	false	0	ENSG00000173559	0
1086.23150019896	5.5	0.0	0.18181818181818182	0.0	10	1	TNFRSF10C	protein_coding	0	false	1.70299325602511	ENSG00000173535	8794	2.0	1	0.0159115591941086	0	false	0	ENSG00000173535	0
769.671314048452	16.5	1.2959531738823291	0.06060606060606061	0.0	32	2	MAP3K11	protein_coding	1	false	0.849243796412382	ENSG00000173327	4296	2.0	1	0.0442043740993019	0	false	0	ENSG00000173327	4366144
953.109333855281	10.5	0.0	0.09523809523809523	0.0	20	1	PPP1R3B	protein_coding	0	false	2.20125568364937	ENSG00000173281	79660	2.0	1	0.00682402053054999	0	false	0	ENSG00000173281	0
94.7830137816603	13.5	0.001967907962458371	0.07407407407407407	0.0	26	2	WDR73	protein_coding	1	false	-0.0613330274360913	ENSG00000177082	84942	2.0	1	0.949223905757117	0	false	0	ENSG00000177082	6630
239.593923408453	2.5	0.0	0.4	0.0	4	1	ABLIM3	protein_coding	0	false	1.62548761716543	ENSG00000173210	22885	4.0	1	0.0373609930694445	0	false	0	ENSG00000173210	0
2780.01747011423	2.0	0.0	0.5	0.0	3	1	PARP14	protein_coding	0	false	1.5247922369226	ENSG00000173193	54625	188.0	1	0.0370496906127562	0	false	0	ENSG00000173193	0
40.3059638838161	19.5	0.01989635091093658	0.05128205128205128	0.0	38	2	COMMD1	protein_coding	1	false	-0.197216342477338	ENSG00000173163	150684	2.0	1	0.841985196431843	0	false	0	ENSG00000173163	67032
167.462130573431	3.5	0.021809050595715123	0.2857142857142857	0.0	6	3	ESRRA	protein_coding	2	false	0.818897039541755	ENSG00000173153	2101	2.0	1	0.209373834861963	0	false	0	ENSG00000173153	73476
854.305946525744	2.0	0.0	0.5	0.0	3	1	HSPA6	protein_coding	0	false	2.22866693543677	ENSG00000173110	3310	188.0	1	0.00100292108293949	0	false	0	ENSG00000173110	0
529.131470154702	2.0	0.0	0.5	0.0	3	1	HPSE	protein_coding	0	false	1.59868746860152	ENSG00000173083	10855	10.0	1	0.013065311076374	0	false	0	ENSG00000173083	0
841.521892755223	2.0	0.0	0.5	0.0	3	1	MYD88	protein_coding	0	false	1.13621778566193	ENSG00000172936	4615	11.0	1	0.00511270779581371	0	false	0	ENSG00000172936	0
714.142648037933	8.0	0.7835568378123274	0.1250	0.0	15	2	ANKRD13D	protein_coding	1	false	1.10803601192889	ENSG00000172932	338692	2.5	1	0.00633232501437094	0	false	0	ENSG00000172932	2639850
30.763524763137	2.0	0.0	0.5	0.0	3	1	EGFL7	protein_coding	0	false	1.60665956687011	ENSG00000172889	51162	10.0	1	0.0333641369593224	0	false	0	ENSG00000172889	0
105.557570743295	7.5	0.0	0.13333333333333333	0.0	14	1	SSH3	protein_coding	0	false	1.4565451538629	ENSG00000172830	54961	4.0	1	0.00238460736033379	0	false	0	ENSG00000172830	0
77.5583868302795	3.0	0.002138578713350311	0.3333333333333333	0.0	5	2	FHL3	protein_coding	1	false	0.407326796489916	ENSG00000183386	2275	2.0	1	0.619648987263532	0	false	0	ENSG00000183386	7205
13.4542745014963	3.5	0.0	0.2857142857142857	0.0	6	1	EFCAB12	protein_coding	0	false	1.98190336957514	ENSG00000172771	90288	2.0	1	0.0498174031771445	0	false	0	ENSG00000172771	0
445.415220533754	4.0	0.0	0.25	0.0	7	1	KLHL6	protein_coding	0	false	1.12899323314862	ENSG00000172578	89857	2.0	1	0.00757503137035598	0	false	0	ENSG00000172578	0
123.334916658006	8.0	0.007675731509679257	0.1250	0.0	15	2	FIBP	protein_coding	1	false	0.047137496192963	ENSG00000172500	9158	3.5	1	0.961733694330903	0	false	0	ENSG00000172500	25860
480.397123061244	21.5	0.0	0.046511627906976744	0.0	42	1	GTPBP2	protein_coding	0	false	1.01984485441127	ENSG00000172432	54676	7.0	1	0.0219222284429008	0	false	0	ENSG00000172432	0
59.5215430950309	24.0	0.0	0.041666666666666664	0.0	47	1	AZU1	protein_coding	0	false	3.51325367307228	ENSG00000172232	566	3.0	1	0.0040432485656312	0	false	0	ENSG00000172232	0
14.546078329488	1.0	4.903444877799742E-4	1.0	0.0	1	2	SMN1	protein_coding	1	false	-0.156534749950173	ENSG00000172062	6606	14.0	1	0.923604367027447	0	false	0	ENSG00000172062	1652
4505.13140190218	3.0	0.0	0.3333333333333333	0.0	5	1	PTEN	protein_coding	0	false	1.04873643243035	ENSG00000171862	5728	4.0	1	0.0473359409964773	0	false	0	ENSG00000171862	0
11.9342709233939	5.0	0.010084415237484639	0.2	0.0	9	2	COL8A2	protein_coding	1	false	-0.145274498925615	ENSG00000171812	1296	2.5	1	0.948847856509957	0	false	0	ENSG00000171812	33975
136.378471724845	3.0	0.05774459344743044	0.3333333333333333	0.0	5	2	TPK1	protein_coding	1	false	0.434138065856025	ENSG00000196511	27010	2.5	1	0.528788748047137	0	false	0	ENSG00000196511	194545
718.482480278763	4.5	0.0	0.2222222222222222	0.0	8	1	RASGRP4	protein_coding	0	false	1.5692905687628	ENSG00000171777	115727	2.0	1	0.00186798024033439	0	false	0	ENSG00000171777	0
707.026321709525	2.0	0.0	0.5	0.0	3	1	CHD7	protein_coding	0	false	1.72217752455492	ENSG00000171316	55636	188.0	1	0.00214038167462747	0	false	0	ENSG00000171316	0
78.8907375282509	8.0	0.006486972627379743	0.1250	0.0	15	2	FAM98B	protein_coding	1	false	-0.751965237032635	ENSG00000171262	283742	2.5	1	0.059747081721414	0	false	0	ENSG00000171262	21855
292.967656041695	2.0	0.0012715712988192551	0.5	0.0	3	2	CYCS	protein_coding	1	false	-0.21860219835111	ENSG00000172115	54205	94.5	1	0.682968579241151	0	false	0	ENSG00000172115	4284
571.488488117542	2.5	0.0	0.4	0.0	4	1	LRG1	protein_coding	0	false	2.22257329572547	ENSG00000171236	116844	2.0	1	0.00375682096525693	0	false	0	ENSG00000171236	0
74.7903632627909	21.5	0.0	0.046511627906976744	0.0	42	1	ZNF692	protein_coding	0	false	1.11322899019226	ENSG00000171163	55657	7.0	1	0.0463520379407724	0	false	0	ENSG00000171163	0
144.08121822624	6.5	0.010375594379441149	0.15384615384615385	0.0	12	2	DRAP1	protein_coding	1	false	0.120343390583111	ENSG00000175550	10589	2.0	1	0.864873844657592	0	false	0	ENSG00000175550	34956
4007.04905809992	13.0	0.0	0.07692307692307693	0.0	25	1	FPR1	protein_coding	0	false	1.97249054681196	ENSG00000171051	2357	6.0	1	0.00675999176833423	0	false	0	ENSG00000171051	0
1385.78103605059	4.5	0.0	0.2222222222222222	0.0	8	1	FPR2	protein_coding	0	false	2.01282532051566	ENSG00000171049	2358	4.0	1	0.00880014822582427	0	false	0	ENSG00000171049	0
382.288456907702	7.0	0.0	0.14285714285714285	0.0	13	1	CEACAM3	protein_coding	0	false	1.80492370150794	ENSG00000170956	1084	2.0	1	0.0305522733347528	0	false	0	ENSG00000170956	0
261.333340661659	2.0	0.0	0.5	0.0	3	1	TANC2	protein_coding	0	false	1.22330173694914	ENSG00000170921	26115	188.0	1	0.0468098509021096	0	false	0	ENSG00000170921	0
256.561008998381	19.0	0.0	0.05263157894736842	0.0	37	1	OSCAR	protein_coding	0	false	1.45983016218793	ENSG00000170909	126014	2.0	1	0.00255482352178151	0	false	0	ENSG00000170909	0
375.574465156985	9.0	0.0	0.1111111111111111	0.0	17	1	TSEN34	protein_coding	0	false	1.26268419426211	ENSG00000170892	79042	4.0	1	0.036538105952196	0	false	0	ENSG00000170892	0
102.969790480528	2.0	0.03879628145536143	0.5	0.0	3	2	RIOX2	protein_coding	1	false	-0.382368457422832	ENSG00000170854	84864	10.0	1	0.605265092040635	0	false	0	ENSG00000170854	130707
168.343305318606	29.5	0.0	0.03389830508474576	0.0	58	1	GPR27	protein_coding	0	false	1.80502706579596	ENSG00000170837	2850	2.0	1	0.0205272868137797	0	false	0	ENSG00000170837	0
112.326636642111	14.0	1.2204279531976276	0.07142857142857142	0.0	27	2	UNC119B	protein_coding	1	false	0.201698814359284	ENSG00000175970	84747	3.5	1	0.749562919891357	0	false	0	ENSG00000175970	4111695
271.471418285165	14.5	1.2538607207945243	0.06896551724137931	0.0	28	3	RNF34	protein_coding	2	false	0.465775795923305	ENSG00000170633	80196	3.3333333333333335	1	0.172591180906955	0	false	0	ENSG00000170633	4224332
11.0289990972138	7.5	0.030671463256813473	0.13333333333333333	0.0	14	2	TBCE	protein_coding	1	false	0.537002881502127	ENSG00000285053	6905	4.0	1	0.635994710213629	0	false	0	ENSG00000285053	103334
1224.70131581213	2.0	0.0	0.5	0.0	3	1	PFKFB3	protein_coding	0	false	2.46428014722373	ENSG00000170525	5209	188.0	1	4.37871719169536E-5	0	false	0	ENSG00000170525	0
61.6718733501395	29.0	0.049402503962529605	0.034482758620689655	0.0	57	3	FAM241A	protein_coding	2	false	0.249558287996506	ENSG00000174749	132720	2.0	1	0.794811241723841	0	false	0	ENSG00000174749	166440
6.96069915091372	29.5	0.0	0.03389830508474576	0.0	58	1	METTL7B	protein_coding	0	false	3.69188557920351	ENSG00000170439	196410	3.0	1	0.0371677235153923	0	false	0	ENSG00000170439	0
387.109801337011	4.0	0.002000854837847946	0.25	0.0	7	2	GYPB	protein_coding	1	false	-1.16482454211046	ENSG00000250361	2994	2.5	1	0.243523523189501	0	false	0	ENSG00000250361	6741
67.0013660855468	21.5	0.020070880304892163	0.046511627906976744	0.0	42	2	TMEM192	protein_coding	1	false	-0.6591686759926	ENSG00000170088	201931	4.0	1	0.167112201004144	0	false	0	ENSG00000170088	67620
323.572905417424	2.0	0.0	0.5	0.0	3	1	TPST1	protein_coding	0	false	2.72699432775487	ENSG00000169902	8460	188.0	1	6.40175518116374E-4	0	false	0	ENSG00000169902	0
2759.50501764192	2.0	0.0	0.5	0.0	3	1	ITGAM	protein_coding	0	false	1.46977896377945	ENSG00000169896	3684	6.0	1	7.73090639456493E-4	0	false	0	ENSG00000169896	0
787.747081215761	2.0	0.0	0.5	0.0	3	1	REPS2	protein_coding	0	false	1.6429104923378	ENSG00000169891	9185	188.0	1	0.0188988376664903	0	false	0	ENSG00000169891	0
643.216517242828	16.5	0.0	0.06060606060606061	0.0	32	1	CLIC4	protein_coding	0	false	1.23567885413553	ENSG00000169504	25932	2.0	1	0.0103399468066478	0	false	0	ENSG00000169504	0
1080.83301880592	5.0	0.04914249078377945	0.2	0.0	9	2	PTAFR	protein_coding	1	false	0.964434729288636	ENSG00000169403	5724	3.5	1	0.105460439510257	0	false	0	ENSG00000169403	165564
241.235441437639	2.5	0.0	0.4	0.0	4	1	RNASE2	protein_coding	0	false	2.34478207771877	ENSG00000169385	6036	2.0	1	0.042157982319135	0	false	0	ENSG00000169385	0
86.6074266009741	16.0	0.0	0.0625	0.0	31	1	THBS3	protein_coding	0	false	1.61409184076316	ENSG00000169231	7059	3.0	1	0.00241701819544918	0	false	0	ENSG00000169231	0
107.704940246275	5.5	0.0	0.18181818181818182	0.0	10	1	RAB24	protein_coding	0	false	1.24590551390918	ENSG00000169228	53917	3.0	1	0.0307239829488223	0	false	0	ENSG00000169228	0
815.543979506655	5.5	0.0	0.18181818181818182	0.0	10	1	RGS14	protein_coding	0	false	1.40940949815152	ENSG00000169220	10636	2.0	1	0.0147736544956779	0	false	0	ENSG00000169220	0
81.2879284281805	27.0	0.4873112975132529	0.037037037037037035	0.0	53	2	NSMCE1	protein_coding	1	false	0.0227895467751767	ENSG00000169189	197370	5.0	1	0.980708650772329	0	false	0	ENSG00000169189	1641781
4827.33837228884	22.5	0.0	0.044444444444444446	0.0	44	1	XPO6	protein_coding	0	false	1.68800810667789	ENSG00000169180	23214	14.0	1	0.00219699422377717	0	false	0	ENSG00000169180	0
35.1167837789269	4.5	0.0	0.2222222222222222	0.0	8	1	SPRY3	protein_coding	0	false	1.49442549027442	ENSG00000168939	10251	8.0	1	0.0192780699115914	0	false	0	ENSG00000168939	0
2141.09439452922	19.0	0.033309291018859856	0.05263157894736842	0.0	37	2	MME	protein_coding	1	false	1.32994665064568	ENSG00000196549	4311	2.0	1	0.352295592915632	0	false	0	ENSG00000196549	112221
1519.95364583054	19.5	0.018463903878233098	0.05128205128205128	0.0	38	2	INPP5D	protein_coding	1	false	0.395195592853456	ENSG00000168918	3635	1.5	1	0.285947257546687	0	false	0	ENSG00000168918	62206
313.000495775634	3.5	0.0	0.2857142857142857	0.0	6	1	ZNF608	protein_coding	0	false	3.62711982849237	ENSG00000168916	57507	2.0	1	3.96072995849324E-4	0	false	0	ENSG00000168916	0
340.195428385282	2.0	0.0	0.5	0.0	3	1	ADAM9	protein_coding	0	false	1.44238971982147	ENSG00000168615	8754	188.0	1	0.00444774124251216	0	false	0	ENSG00000168615	0
2245.13634137045	2.0	0.0	0.5	0.0	3	1	STAT3	protein_coding	0	false	1.23399024887568	ENSG00000168610	6774	188.0	1	0.00198400392770372	0	false	0	ENSG00000168610	0
1777.24288905989	8.0	0.0	0.1250	0.0	15	1	RAB31	protein_coding	0	false	1.31368497148873	ENSG00000168461	11031	2.0	1	0.00742379782586068	0	false	0	ENSG00000168461	0
1206.37520922734	2.0	0.007689978807145019	0.5	0.0	3	5	BRD2	protein_coding	4	false	0.513124353270225	ENSG00000204256	6046	4.8	1	0.00120575090011968	0	false	0	ENSG00000204256	25908
363.706465997416	2.5	0.0	0.4	0.0	4	1	MLKL	protein_coding	0	false	1.08429946174328	ENSG00000168404	197259	5.0	1	0.00265532518535784	0	false	0	ENSG00000168404	0
1559.32466755975	2.0	0.0	0.5	0.0	3	1	TAP1	protein_coding	0	false	1.19601192143624	ENSG00000168394	6890	188.0	1	0.0318008970815074	0	false	0	ENSG00000168394	0
510.346382122092	15.5	0.0	0.06451612903225806	0.0	30	1	PXK	protein_coding	0	false	1.10462416955827	ENSG00000168297	54899	3.0	1	0.00486012687350391	0	false	0	ENSG00000168297	0
154.284581607732	13.0	0.20710524597365437	0.07692307692307693	0.0	25	2	BTLA	protein_coding	1	false	-0.0625674171951251	ENSG00000186265	151888	2.0	1	0.932139539763186	0	false	0	ENSG00000186265	697750
113.256670597477	11.5	0.6420437748214635	0.08695652173913043	0.0	22	2	GLYCTK	protein_coding	1	false	0.378398142276045	ENSG00000168237	132158	3.5	1	0.548268094756049	0	false	0	ENSG00000168237	2163084
869.229615805346	5.5	0.0	0.18181818181818182	0.0	10	1	RBPJ	protein_coding	0	false	1.0752821539554	ENSG00000168214	3516	3.0	1	0.0193930484741474	0	false	0	ENSG00000168214	0
159.193295035583	9.5	0.037089277127744825	0.10526315789473684	0.0	18	2	TIMM23	protein_coding	1	false	-1.27651371865891	ENSG00000265354	100287932	2.5	1	0.0254843422236275	0	false	0	ENSG00000265354	124956
77.128721942625	10.0	0.03135028761731759	0.1	0.0	19	2	NUDT16L1	protein_coding	1	false	-0.30677729675722	ENSG00000168101	84309	2.5	1	0.657323697629762	0	false	0	ENSG00000168101	105621
572.006434445046	7.5	0.018537514915139535	0.13333333333333333	0.0	14	3	PAFAH1B2	protein_coding	2	false	0.374388717337617	ENSG00000168092	5049	2.6666666666666665	1	0.210122152189692	0	false	0	ENSG00000168092	62454
59.0015236787537	6.0	0.0	0.16666666666666666	0.0	11	1	BATF2	protein_coding	0	false	3.70160860926917	ENSG00000168062	116071	2.0	1	0.00185440523790775	0	false	0	ENSG00000168062	0
2248.3877470008	4.0	0.0	0.25	0.0	7	1	ATG16L2	protein_coding	0	false	1.48099089371103	ENSG00000168010	89849	2.0	1	5.32453102353087E-4	0	false	0	ENSG00000168010	0
385.422394537631	2.5	0.0	0.4	0.0	4	1	BEST1	protein_coding	0	false	1.67360090683123	ENSG00000167995	7439	2.0	1	0.0157389215132769	0	false	0	ENSG00000167995	0
475.46671126682	3.0	0.004091645740948514	0.3333333333333333	0.0	5	2	ZNF131	protein_coding	1	false	-1.32944359047857	ENSG00000172262	7690	2.5	1	0.0122792407967273	0	false	0	ENSG00000172262	13785
33.6678410920111	3.5	0.0024576588128439386	0.2857142857142857	0.0	6	2	TK1	protein_coding	1	false	-0.412937750846954	ENSG00000167900	7083	1.5	1	0.754985111668482	0	false	0	ENSG00000167900	8280
23.1891375254151	5.5	0.0	0.18181818181818182	0.0	10	1	TMEM88	protein_coding	0	false	2.21400517686448	ENSG00000167874	92162	2.0	1	0.0158043641200381	0	false	0	ENSG00000167874	0
833.441716427916	4.5	0.0	0.2222222222222222	0.0	8	1	CD300A	protein_coding	0	false	1.30892329242896	ENSG00000167851	11314	22.0	1	0.0219756089987427	0	false	0	ENSG00000167851	0
494.427329715854	15.5	0.5875852611707716	0.06451612903225806	0.0	30	2	RILP	protein_coding	1	false	-1.51706082898667	ENSG00000167705	83547	2.5	1	0.103959297146101	0	false	0	ENSG00000167705	1979610
141.55860916546	2.5	0.0	0.4	0.0	4	1	PLIN4	protein_coding	0	false	2.05341078714813	ENSG00000167676	729359	2.0	1	0.00195531282628008	0	false	0	ENSG00000167676	0
215.589296941717	25.0	0.0	0.04	0.0	49	1	DHRS13	protein_coding	0	false	1.22349213670217	ENSG00000167536	147015	3.0	1	0.0318008970815074	0	false	0	ENSG00000167536	0
2244.39018635843	3.5	0.0	0.2857142857142857	0.0	6	1	TPM4	protein_coding	0	false	1.15240392487504	ENSG00000167460	7171	13.0	1	0.0366921905495634	0	false	0	ENSG00000167460	0
122.868761050862	2.5	0.0	0.4	0.0	4	1	CA4	protein_coding	0	false	2.25038810117461	ENSG00000167434	762	2.0	1	0.0317312154187181	0	false	0	ENSG00000167434	0
46.4639044132982	9.0	0.6642698556867493	0.1111111111111111	0.0	17	4	TMEM242	protein_coding	3	false	-0.323386261530064	ENSG00000215712	729515	4.0	1	0.697288615840999	0	false	0	ENSG00000215712	2237965
54.026751243477	9.5	0.00879414436074157	0.10526315789473684	0.0	18	2	VKORC1	protein_coding	1	false	0.189646627614505	ENSG00000167397	79001	2.5	1	0.85699597978097	0	false	0	ENSG00000167397	29628
75.9185935429392	1.5	0.0	0.6666666666666666	0.0	2	1	LOXHD1	protein_coding	0	false	1.72537491823842	ENSG00000167210	125336	9.0	1	0.0229859759469858	0	false	0	ENSG00000167210	0
492.627213663325	33.0	0.0	0.030303030303030304	0.0	65	1	NOD2	protein_coding	0	false	1.2192556116128	ENSG00000167207	64127	4.0	1	0.0219756089987427	0	false	0	ENSG00000167207	0
161.024146403896	10.0	0.032664303989836926	0.1	0.0	19	2	ACBD6	protein_coding	1	false	-0.470887982524311	ENSG00000230124		2.0	1	0.521488887507927	0	false	0	ENSG00000230124	110048
79.3111319384766	10.5	0.02628626382433082	0.09523809523809523	0.0	20	2	URM1	protein_coding	1	false	-0.429937071611887	ENSG00000167118	81605	2.0	1	0.324215713130366	0	false	0	ENSG00000167118	88560
59.7113461974818	4.5	0.0	0.2222222222222222	0.0	8	1	SAMD14	protein_coding	0	false	2.64534293322362	ENSG00000167100	201191	5.0	1	0.0260729098152177	0	false	0	ENSG00000167100	0
268.384930838195	6.0	0.0	0.16666666666666666	0.0	11	1	MBD6	protein_coding	0	false	1.03494923053723	ENSG00000166987	114785	5.0	1	0.0373104168521684	0	false	0	ENSG00000166987	0
199.193322050696	2.0	0.0	0.5	0.0	3	1	MAP1A	protein_coding	0	false	2.37717360148335	ENSG00000166963	4130	188.0	1	0.00143473446508633	0	false	0	ENSG00000166963	0
149.974067748668	21.5	0.194687538957454	0.046511627906976744	0.0	42	2	MAFK	protein_coding	1	false	-0.0395439340640371	ENSG00000198517	7975	8.0	1	0.962507462815949	0	false	0	ENSG00000198517	655914
1166.01440513726	10.0	0.0	0.1	0.0	19	1	STX3	protein_coding	0	false	1.76679730803794	ENSG00000166900	6809	8.0	1	0.0100142111177391	0	false	0	ENSG00000166900	0
12.8469957222677	14.5	0.08853626827661128	0.06896551724137931	0.0	28	3	SRXN1	protein_coding	2	false	-1.76953277408367	ENSG00000271303	140809	2.6666666666666665	1	0.126250008827571	0	false	0	ENSG00000271303	298284
918.150188021125	10.5	0.07197853407181824	0.09523809523809523	0.0	20	2	AP1G1	protein_coding	1	false	0.479738483513245	ENSG00000166747	164	2.5	1	0.0274520753619265	0	false	0	ENSG00000166747	242500
54.6449746546118	3.0	0.020326144384487068	0.3333333333333333	0.0	5	2	ZNF606	protein_coding	1	false	0.297082197335612	ENSG00000166704	80095	3.0	1	0.757106867792252	0	false	0	ENSG00000166704	68480
284.204831129394	18.5	0.00879414436074157	0.05405405405405406	0.0	36	2	BEX3	protein_coding	1	false	-0.100571123044066	ENSG00000166681	27018	2.0	1	0.928592350409286	0	false	0	ENSG00000166681	29628
215.368637144992	3.5	0.0	0.2857142857142857	0.0	6	1	TK2	protein_coding	0	false	1.15300480407481	ENSG00000166548	7084	3.0	1	0.0034154708372011	0	false	0	ENSG00000166548	0
277.052179777857	2.5	0.0	0.4	0.0	4	1	CLEC4D	protein_coding	0	false	1.75795974668118	ENSG00000166527	338339	8.0	1	0.0156490529457494	0	false	0	ENSG00000166527	0
904.576480829979	4.0	0.0	0.25	0.0	7	1	CLEC4E	protein_coding	0	false	2.6789847449099	ENSG00000166523	26253	9.0	1	6.05548717366042E-4	0	false	0	ENSG00000166523	0
26.1888391505387	17.5	0.6013523059844585	0.05714285714285714	0.0	34	4	SPINDOC	protein_coding	3	false	0.204656359743041	ENSG00000168005	144097	2.5	1	0.861208766065178	0	false	0	ENSG00000168005	2025992
61.8377254028871	18.0	0.015821920654425864	0.05555555555555555	0.0	35	2	MAPK7	protein_coding	1	false	0.181259917946177	ENSG00000166484	5598	2.5	1	0.768761471665586	0	false	0	ENSG00000166484	53305
158.443010151579	3.0	0.08609523131081072	0.3333333333333333	0.0	5	2	EXOSC1	protein_coding	1	false	-0.391915157907668	ENSG00000171311	51013	3.0	1	0.383902589369394	0	false	0	ENSG00000171311	290060
868.38484759419	2.5	0.0	0.4	0.0	4	1	ILK	protein_coding	0	false	1.1302703560761	ENSG00000166333	3611	5.0	1	0.0185685139278219	0	false	0	ENSG00000166333	0
46.7147060034448	24.5	0.9030364552723905	0.04081632653061224	0.0	48	3	KIFBP	protein_coding	2	false	-0.153825028415289	ENSG00000198954	26128	2.0	1	0.89844643987995	0	false	0	ENSG00000198954	3042384
69.7725422421881	25.0	0.8823188070262922	0.04	0.0	49	2	PLEKHF1	protein_coding	1	false	-0.296758983414965	ENSG00000166289	79156	2.5	1	0.755230905195484	0	false	0	ENSG00000166289	2972585
86.1868326141177	13.0	0.6723759743073735	0.07692307692307693	0.0	25	3	H4C9	protein_coding	2	false	-0.452858175692692	ENSG00000276180	8294	3.3333333333333335	1	0.605559428462241	0	false	0	ENSG00000276180	2265275
189.884929497615	1.0	0.004070868432144277	1.0	0.0	1	9	NOLC1	protein_coding	8	false	-0.251437869490376	ENSG00000166197	9221	3.888888888888889	1	0.521000533591394	0	false	0	ENSG00000166197	13715
182.176517831212	2.0	0.0	0.5	0.0	3	1	ZNF319	protein_coding	0	false	1.28570061350279	ENSG00000166188	57567	188.0	1	0.0131291032474813	0	false	0	ENSG00000166188	0
243.37691218045	2.0	0.0	0.5	0.0	3	1	CMTM5	protein_coding	0	false	1.57133358711271	ENSG00000166091	116173	6.0	1	0.0427539700938732	0	false	0	ENSG00000166091	0
25.9931238207	2.0	0.0	0.5	0.0	3	1	ABTB2	protein_coding	0	false	1.89768997314911	ENSG00000166016	25841	188.0	1	0.0411322682534886	0	false	0	ENSG00000166016	0
27.574856302754	8.0	0.09809264305177111	0.1250	0.0	15	3	WBP1	protein_coding	2	false	0.0955854575809954	ENSG00000239779	23559	3.0	1	0.915043448489463	0	false	0	ENSG00000239779	330480
55.3876269929567	9.0	0.0	0.1111111111111111	0.0	17	1	UBTD1	protein_coding	0	false	1.61333501502059	ENSG00000165886	80019	4.0	1	0.0176405039509603	0	false	0	ENSG00000165886	0
485.398004619111	3.5	0.0	0.2857142857142857	0.0	6	1	FRAT1	protein_coding	0	false	1.59852369051394	ENSG00000165879	10023	3.0	1	0.00418377821870628	0	false	0	ENSG00000165879	0
206.606074893592	8.5	0.020924530878049068	0.11764705882352941	0.0	16	2	ZFYVE1	protein_coding	1	false	0.154784666891524	ENSG00000165861	53349	3.0	1	0.862180005883324	0	false	0	ENSG00000165861	70496
713.595209555789	2.0	0.0	0.5	0.0	3	1	ARHGEF40	protein_coding	0	false	1.32543938607105	ENSG00000165801	55701	188.0	1	0.0276698228210921	0	false	0	ENSG00000165801	0
453.493856207806	9.0	0.00912301947724291	0.1111111111111111	0.0	17	2	FUNDC2	protein_coding	1	false	-1.11401494931213	ENSG00000165775	65991	3.0	1	0.141996924288212	0	false	0	ENSG00000165775	30736
446.560486202935	4.5	0.0038182757208242058	0.2222222222222222	0.0	8	2	TSC1	protein_coding	1	false	0.0628748965116441	ENSG00000165699	7248	4.5	1	0.913494052867402	0	false	0	ENSG00000165699	12864
35.074218376851	1.5	0.007507732127062148	0.6666666666666666	0.0	2	3	CHCHD10	protein_coding	2	false	-0.363886883617601	ENSG00000250479	400916	4.666666666666667	1	0.689766903179451	0	false	0	ENSG00000250479	25294
957.874889202359	2.0	0.0013152036473081511	0.5	0.0	3	2	GHITM	protein_coding	1	false	0.0672310172363494	ENSG00000165678	27069	2.0	1	0.943844409616852	0	false	0	ENSG00000165678	4431
32.6387821356606	6.5	0.0	0.15384615384615385	0.0	12	1	BEND7	protein_coding	0	false	2.15824093102629	ENSG00000165626	222389	5.0	1	0.0373095666355269	0	false	0	ENSG00000165626	0
10.3954843903976	2.5	0.0	0.4	0.0	4	1	DEPP1	protein_coding	0	false	3.04891710734354	ENSG00000165507	11067	2.0	1	0.043072528624882	0	false	0	ENSG00000165507	0
139.193624062016	1.0	0.007344778662297495	1.0	0.0	1	2	NOL6	protein_coding	1	false	-0.335391030268326	ENSG00000165271	65083	19.0	1	0.70037026781238	0	false	0	ENSG00000165271	24745
249.88445753093	1.0	0.0951099119635744	1.0	0.0	1	2	STRBP	protein_coding	1	false	-0.609746001536951	ENSG00000165209	55342	18.5	1	0.347707168445486	0	false	0	ENSG00000165209	320431
95.7958510757519	2.0	0.0	0.5	0.0	3	1	KIAA1958	protein_coding	0	false	1.58752129120947	ENSG00000165185	158405	188.0	1	0.0096033494006947	0	false	0	ENSG00000165185	0
3912.00862749682	2.0	0.0014977471460882264	0.5	0.0	3	2	CYBB	protein_coding	1	false	0.418604108499917	ENSG00000165168	1536	2.0	1	0.626829839848509	0	false	0	ENSG00000165168	5046
61.8322977561191	4.0	0.003629795848100063	0.25	0.0	7	2	FBP1	protein_coding	1	false	0.28298939102221	ENSG00000165140	2203	5.0	1	0.821807490146752	0	false	0	ENSG00000165140	12229
3086.49291791433	2.0	0.0016010400527150005	0.5	0.0	3	2	HNRNPK	protein_coding	1	false	-0.0539416635840278	ENSG00000165119	3190	94.5	1	0.922624579599573	0	false	0	ENSG00000165119	5394
266.871475598303	6.5	0.0	0.15384615384615385	0.0	12	1	KIF27	protein_coding	0	false	1.80188266158532	ENSG00000165115	55582	2.0	1	0.0365436110700062	0	false	0	ENSG00000165115	0
101.547734848209	2.5	0.0034537823606584626	0.4	0.0	4	3	TMX2	protein_coding	2	false	-0.151245446423091	ENSG00000213593	51075	2.0	1	0.84499071721976	0	false	0	ENSG00000213593	11636
856.247360382121	3.0	0.0	0.3333333333333333	0.0	5	1	TMEM71	protein_coding	0	false	1.03751546171365	ENSG00000165071	137835	3.0	1	0.0468809109061872	0	false	0	ENSG00000165071	0
471.988328048187	2.0	0.0	0.5	0.0	3	1	NFIL3	protein_coding	0	false	1.57825779555547	ENSG00000165030	4783	188.0	1	0.0243833782348996	0	false	0	ENSG00000165030	0
273.862360993523	23.0	0.017604316931132125	0.043478260869565216	0.0	45	2	SNTB2	protein_coding	1	false	0.31112985536887	ENSG00000168807	6645	2.0	1	0.532339627636547	0	false	0	ENSG00000168807	59310
1346.80635297364	23.5	0.0	0.0425531914893617	0.0	46	1	ABCA1	protein_coding	0	false	2.41155460579561	ENSG00000165029	19	2.0	1	5.00830336336971E-4	0	false	0	ENSG00000165029	0
1089.22288299627	5.0	0.0	0.2	0.0	9	1	TP53INP1	protein_coding	0	false	1.2629518470471	ENSG00000164938	94241	5.0	1	0.0191049657665779	0	false	0	ENSG00000164938	0
26.0300454518616	13.0	0.07671279229221206	0.07692307692307693	0.0	25	2	GPR52	protein_coding	1	false	0.907999793960039	ENSG00000203737	9293	3.0	1	0.290830199596967	0	false	0	ENSG00000203737	258450
79.5768567129354	11.0	0.36813859058609816	0.09090909090909091	0.0	21	2	CMKLR1	protein_coding	1	false	-0.314410064158178	ENSG00000174600	1240	4.0	1	0.802162305074535	0	false	0	ENSG00000174600	1240281
396.120849823222	7.5	0.0	0.13333333333333333	0.0	14	1	BRI3	protein_coding	0	false	1.24580358558037	ENSG00000164713	25798	3.0	1	0.0194844629519351	0	false	0	ENSG00000164713	0
177.744220533263	3.0	0.015485031433100033	0.3333333333333333	0.0	5	3	NELFE	protein_coding	2	false	-0.0471983902694229	ENSG00000204356	7936	2.3333333333333335	1	0.947745826819558	0	false	0	ENSG00000204356	52170
210.727300607686	3.5	0.0178750155829816	0.2857142857142857	0.0	6	2	BMT2	protein_coding	1	false	0.391550608538145	ENSG00000164603	154743	2.0	1	0.388608780163218	0	false	0	ENSG00000164603	60222
219.119087318089	7.0	0.006181546187957471	0.14285714285714285	0.0	13	2	FEZ2	protein_coding	1	false	0.868953639795728	ENSG00000171055	9637	2.0	1	0.0181132783742705	0	false	0	ENSG00000171055	20826
254.678339402927	7.5	0.0012133948341673938	0.13333333333333333	0.0	14	2	SAP30L	protein_coding	1	false	0.57141180751188	ENSG00000164576	79685	2.0	1	0.193420745808936	0	false	0	ENSG00000164576	4088
1091.49064226593	2.0	0.0	0.5	0.0	3	1	STXBP5	protein_coding	0	false	1.26472498828641	ENSG00000164506	134957	188.0	1	0.0302151982959298	0	false	0	ENSG00000164506	0
8.74392299364875	5.5	0.445551578185013	0.18181818181818182	0.0	10	2	NEFL	protein_coding	1	false	-1.31072814495531	ENSG00000277586	4747	3.5	1	0.405373032738563	0	false	0	ENSG00000277586	1501090
10.7484065873619	6.0	0.4858393735938214	0.16666666666666666	0.0	11	2	TXLNB	protein_coding	1	false	0.3570825632662	ENSG00000164440	167838	5.0	1	0.806069950523412	0	false	0	ENSG00000164440	1636822
102.451155642993	1.5	0.0010364908906341827	0.6666666666666666	0.0	2	2	AGGF1	protein_coding	1	false	-0.0327636632238713	ENSG00000164252	55109	3.0	1	0.956944982888216	0	false	0	ENSG00000164252	3492
121.127012213647	2.0	0.0	0.5	0.0	3	1	ANKRD33B	protein_coding	0	false	1.80930516560104	ENSG00000164236	651746	188.0	1	0.00350848282394644	0	false	0	ENSG00000164236	0
199.641057252672	5.0	0.003892183576427846	0.2	0.0	9	2	TMEM184C	protein_coding	1	false	0.274610110448085	ENSG00000164168	55751	2.5	1	0.66508442659107	0	false	0	ENSG00000164168	13113
64.5581951039415	6.0	0.0	0.16666666666666666	0.0	11	1	TMEM144	protein_coding	0	false	1.77860445795543	ENSG00000164124	55314	2.0	1	0.00877377549318293	0	false	0	ENSG00000164124	0
46.0594253346069	3.0	0.006390506550788647	0.3333333333333333	0.0	5	3	HAUS5	protein_coding	2	false	-0.545643893170947	ENSG00000249115	23354	1.6666666666666667	1	0.367378847702187	0	false	0	ENSG00000249115	21530
165.212331840631	3.5	0.002692739221029011	0.2857142857142857	0.0	6	2	CEP44	protein_coding	1	false	-0.0194776587020101	ENSG00000164118	80817	2.0	1	0.978369471005796	0	false	0	ENSG00000164118	9072
1274.37528084524	6.5	0.0	0.15384615384615385	0.0	12	1	HMGB2	protein_coding	0	false	1.89382151217896	ENSG00000164104	3148	5.0	1	5.71741947003404E-4	0	false	0	ENSG00000164104	0
651.413940887781	7.5	0.006150083406053913	0.13333333333333333	0.0	14	2	C4orf3	protein_coding	1	false	0.580605585008399	ENSG00000164096	401152	2.5	1	0.201247692786879	0	false	0	ENSG00000164096	20720
710.796058959422	21.5	0.07707966020195543	0.046511627906976744	0.0	42	2	WDR82	protein_coding	1	false	-0.231507552608628	ENSG00000164091	80335	3.0	1	0.506415644468479	0	false	0	ENSG00000164091	259686
935.205557826376	5.0	0.04944435539883528	0.2	0.0	9	2	FAR1	protein_coding	1	false	0.871087088994484	ENSG00000197601	84188	3.5	1	0.0672821156733864	0	false	0	ENSG00000197601	166581
99.5622621812645	5.5	0.0510914023496168	0.18181818181818182	0.0	10	2	DUSP7	protein_coding	1	false	-0.571198732326165	ENSG00000164086	1849	3.0	1	0.211537593245659	0	false	0	ENSG00000164086	172130
120.541696227981	4.0	0.003183083708808985	0.25	0.0	7	2	TEX264	protein_coding	1	false	-0.00163442449132171	ENSG00000164081	51368	4.0	1	0.9986373962671	0	false	0	ENSG00000164081	10724
470.345350901537	28.0	0.4208918808213567	0.03571428571428571	0.0	55	2	EID1	protein_coding	1	false	-0.40939056256417	ENSG00000255302	23741	3.5	1	0.501400774931988	0	false	0	ENSG00000255302	1418010
27.003090173717	28.5	0.40705241224555216	0.03508771929824561	0.0	56	2	BDH2	protein_coding	1	false	-1.43353905639249	ENSG00000164039	56898	2.5	1	0.178104266980714	0	false	0	ENSG00000164039	1371384
255.75331434815	5.0	0.004255489661804776	0.2	0.0	9	2	EPM2AIP1	protein_coding	1	false	0.0990405624040154	ENSG00000178567	9852	2.5	1	0.869523656447817	0	false	0	ENSG00000178567	14337
396.687902411279	26.5	0.0	0.03773584905660377	0.0	52	1	S100P	protein_coding	0	false	2.38734787709378	ENSG00000163993	6286	6.0	1	0.0284170886352589	0	false	0	ENSG00000163993	0
3608.00481823674	25.5	0.01912996503475747	0.0392156862745098	0.0	50	2	YOD1	protein_coding	1	false	0.113853920670813	ENSG00000180667	55432	1.5	1	0.941624815518453	0	false	0	ENSG00000180667	64450
29.4936487915719	26.0	0.0	0.038461538461538464	0.0	51	1	ZDHHC19	protein_coding	0	false	4.1100408967528	ENSG00000163958	131540	2.0	1	0.016793143681884	0	false	0	ENSG00000163958	0
737.823019165405	7.5	0.0	0.13333333333333333	0.0	14	1	PRKCD	protein_coding	0	false	1.45714727908814	ENSG00000163932	5580	4.0	1	4.76770144789168E-4	0	false	0	ENSG00000163932	0
111.942081621523	14.5	0.10944655185719458	0.06896551724137931	0.0	28	2	PRIM1	protein_coding	1	false	-1.40067138348406	ENSG00000198056	5557	2.5	1	0.0381037378601884	0	false	0	ENSG00000198056	368732
27.7315065195726	15.0	0.10228580078716318	0.06666666666666667	0.0	29	2	LIPH	protein_coding	1	false	0.299215701104283	ENSG00000163898	200879	2.5	1	0.875788609191906	0	false	0	ENSG00000163898	344607
183.771644023954	22.5	0.0	0.044444444444444446	0.0	44	1	ZC3H12A	protein_coding	0	false	1.30635550379722	ENSG00000163874	80149	14.0	1	0.0294365656693333	0	false	0	ENSG00000163874	0
872.845158997025	30.0	0.33247107501795753	0.03333333333333333	0.0	59	3	PLEKHO2	protein_coding	2	false	1.27127261280667	ENSG00000241839	80301	4.333333333333333	1	0.00529599396211015	0	false	0	ENSG00000241839	1120115
1169.56136912747	15.5	0.0	0.06451612903225806	0.0	30	1	DTX3L	protein_coding	0	false	1.20911843106423	ENSG00000163840	151636	5.0	1	0.0366910241213821	0	false	0	ENSG00000163840	0
100.906433258436	8.5	0.028594326013784258	0.11764705882352941	0.0	16	4	TSEN15	protein_coding	3	false	-0.340493437458449	ENSG00000198860	116461	1.5	1	0.312369585376096	0	false	0	ENSG00000198860	96336
253.600486907667	9.0	0.0	0.1111111111111111	0.0	17	1	PLB1	protein_coding	0	false	1.57647271154038	ENSG00000163803	151056	4.0	1	0.0452943572023105	0	false	0	ENSG00000163803	0
529.141174333815	7.0	0.0	0.14285714285714285	0.0	13	1	GYG1	protein_coding	0	false	1.87318156085474	ENSG00000163754	2992	3.0	1	2.70005249560194E-4	0	false	0	ENSG00000163754	0
46.2752509550867	7.0	0.07845007212694341	0.14285714285714285	0.0	13	2	CCNQ	protein_coding	1	false	-0.481436302067291	ENSG00000262919	92002	2.0	1	0.60057954046476	0	false	0	ENSG00000262919	264303
461.790642738165	7.5	0.07917401292942244	0.13333333333333333	0.0	14	2	TTC14	protein_coding	1	false	-0.00830285276399619	ENSG00000163728	151613	2.5	1	0.991720774976853	0	false	0	ENSG00000163728	266742
416.471876919921	4.0	0.01701453817978902	0.25	0.0	7	3	CHURC1	protein_coding	2	false	0.377037291223852	ENSG00000258289	91612	5.333333333333333	1	0.564861766746679	0	false	0	ENSG00000258289	57323
1090.20773775564	2.0	0.0	0.5	0.0	3	1	RBM47	protein_coding	0	false	1.37844332150543	ENSG00000163694	54502	188.0	1	0.00546055367009843	0	false	0	ENSG00000163694	0
119.340892570203	5.0	0.007383661911631137	0.2	0.0	9	2	TVP23B	protein_coding	1	false	0.0960830892822849	ENSG00000171928	51030	2.5	1	0.917721679231947	0	false	0	ENSG00000171928	24876
39.0264206105241	12.5	0.007137896030346743	0.08	0.0	24	2	RPP14	protein_coding	1	false	0.135854855686007	ENSG00000163684	11102	2.0	1	0.897328985667706	0	false	0	ENSG00000163684	24048
573.186033125631	6.5	0.04886823030756353	0.15384615384615385	0.0	12	2	GMPS	protein_coding	1	false	-1.39865218355404	ENSG00000163655	8833	3.5	1	0.00868562414213698	0	false	0	ENSG00000163655	164640
50.5153839972422	5.5	0.003591506236160828	0.18181818181818182	0.0	10	2	GP5	protein_coding	1	false	1.26807863483265	ENSG00000178732	2814	3.5	1	0.185259976927113	0	false	0	ENSG00000178732	12100
2407.37696191735	2.0	0.0	0.5	0.0	3	1	WDFY3	protein_coding	0	false	2.00827115646371	ENSG00000163625	23001	188.0	1	1.16194685261946E-4	0	false	0	ENSG00000163625	0
181.009589516938	26.5	0.0	0.03773584905660377	0.0	52	1	AIM2	protein_coding	0	false	2.65487883155258	ENSG00000163568	9447	6.0	1	1.92476760923246E-4	0	false	0	ENSG00000163568	0
1524.28714209015	2.0	0.0	0.5	0.0	3	1	IFI16	protein_coding	0	false	1.24008104398331	ENSG00000163565	3428	188.0	1	0.0180188602755561	0	false	0	ENSG00000163565	0
13.2141462432082	2.5	0.028356871056021558	0.4	0.0	4	2	MAP10	protein_coding	1	false	-1.06155409740999	ENSG00000212916	54627	3.0	1	0.386715817655002	0	false	0	ENSG00000212916	95536
8.66731454115516	13.0	0.011716918072103196	0.07692307692307693	0.0	25	2	TACSTD2	protein_coding	1	false	2.74560729375776	ENSG00000184292	4070	4.0	1	0.156435969142353	0	false	0	ENSG00000184292	39475
476.040396602711	2.0	0.0014042492564691634	0.5	0.0	3	2	CCT3	protein_coding	1	false	-0.306166817910447	ENSG00000163468	7203	94.5	1	0.471616002936563	0	false	0	ENSG00000163468	4731
1966.40174960336	5.5	0.0	0.18181818181818182	0.0	10	1	CXCR1	protein_coding	0	false	1.75688267354568	ENSG00000163464	3577	2.0	1	0.0398389517382939	0	false	0	ENSG00000163464	0
266.60846392877	20.5	0.0	0.04878048780487805	0.0	40	1	FSTL1	protein_coding	0	false	2.41425245416071	ENSG00000163430	11167	5.0	1	0.00216311811859516	0	false	0	ENSG00000163430	0
651.364024475953	1.0	3.7458519587065827E-4	1.0	0.0	1	2	LENG8	protein_coding	1	false	0.352398308287513	ENSG00000167615	114823	14.0	1	0.67485219585869	0	false	0	ENSG00000167615	1262
959.038714827497	1.5	0.0	0.6666666666666666	0.0	2	1	PROK2	protein_coding	0	false	1.7243864887752	ENSG00000163421	60675	2.0	1	0.0258895928596094	0	false	0	ENSG00000163421	0
1059.61758103489	5.5	0.0	0.18181818181818182	0.0	10	1	EIF4E3	protein_coding	0	false	1.32797066931782	ENSG00000163412	317649	2.0	1	6.70018022426579E-4	0	false	0	ENSG00000163412	0
377.281867226113	10.0	0.0	0.1	0.0	19	1	SLC22A15	protein_coding	0	false	2.12373248771022	ENSG00000163393	55356	6.0	1	1.15439436520889E-5	0	false	0	ENSG00000163393	0
81.800604435826	2.0	0.0	0.5	0.0	3	1	COL6A3	protein_coding	0	false	3.24803215613255	ENSG00000163359	1293	6.0	1	0.0065437783879744	0	false	0	ENSG00000163359	0
1010.27398082352	12.0	1.103645824057749	0.08333333333333333	0.0	23	2	SETD3	protein_coding	1	false	-0.967375722295596	ENSG00000183576	84193	3.0	1	0.108776300483584	0	false	0	ENSG00000183576	3718249
68.5915141421807	5.5	0.004336521166141297	0.18181818181818182	0.0	10	2	PAQR3	protein_coding	1	false	0.062751325186408	ENSG00000163291	152559	2.0	1	0.947745826819558	0	false	0	ENSG00000163291	14610
205.545204945724	7.0	0.0	0.14285714285714285	0.0	13	1	TGFA	protein_coding	0	false	1.86009761337887	ENSG00000163235	7039	2.0	1	0.0279260048557047	0	false	0	ENSG00000163235	0
2025.4906469689	2.5	0.0	0.4	0.0	4	1	S100A12	protein_coding	0	false	3.54881141077651	ENSG00000163221	6283	2.0	1	7.84771570040547E-5	0	false	0	ENSG00000163221	0
33200.9244885656	2.0	0.0	0.5	0.0	3	1	S100A9	protein_coding	0	false	2.37549266824356	ENSG00000163220	6280	188.0	1	7.72859877339993E-4	0	false	0	ENSG00000163220	0
1408.53098453417	7.5	0.0	0.13333333333333333	0.0	14	1	CDC42EP3	protein_coding	0	false	1.06355871398221	ENSG00000163171	10602	2.0	1	0.0390351016677893	0	false	0	ENSG00000163171	0
3235.52140159825	2.5	0.0	0.4	0.0	4	1	RNF149	protein_coding	0	false	1.1653144173347	ENSG00000163162	284996	5.0	1	0.031460230297826	0	false	0	ENSG00000163162	0
78.7588123150002	17.0	0.039444533490053606	0.058823529411764705	0.0	33	2	VPS72	protein_coding	1	false	0.0180055856296789	ENSG00000163159	6944	2.5	1	0.98647809077004	0	false	0	ENSG00000163159	132891
1011.03813465012	13.0	0.0	0.07692307692307693	0.0	25	1	H3-3A	protein_coding	0	false	1.01989551360341	ENSG00000163041	3020	6.0	1	0.0391893410583177	0	false	0	ENSG00000163041	0
140.453343065024	10.0	0.056102295595804166	0.1	0.0	19	2	NUP35	protein_coding	1	false	-1.60793373274907	ENSG00000163002	129401	2.0	1	0.0133017592421663	0	false	0	ENSG00000163002	189012
11.8407805845008	11.0	0.0	0.09090909090909091	0.0	21	1	CAPN13	protein_coding	0	false	3.9648542401028	ENSG00000162949	92291	2.0	1	0.029169202904177	0	false	0	ENSG00000162949	0
306.074461169306	2.0	0.003041798008940179	0.5	0.0	3	3	RBM15	protein_coding	2	false	0.0267862003520862	ENSG00000162775	64783	63.333333333333336	1	0.954684989154809	0	false	0	ENSG00000162775	10248
14.6446374585422	7.0	0.01524549874445691	0.14285714285714285	0.0	13	3	BACE1	protein_coding	2	false	-0.689331160993075	ENSG00000186318	23621	1.6666666666666667	1	0.593100308838744	0	false	0	ENSG00000186318	51363
411.05774203939	7.5	0.005784402771099356	0.13333333333333333	0.0	14	2	NCSTN	protein_coding	1	false	0.696839492295069	ENSG00000162736	23385	2.0	1	0.0560903764645506	0	false	0	ENSG00000162736	19488
495.088117982152	11.0	0.0	0.09090909090909091	0.0	21	1	ZNF281	protein_coding	0	false	1.33357615907058	ENSG00000162702	23528	4.0	1	0.0320305690723755	0	false	0	ENSG00000162702	0
7.34206383493488	33.5	0.0	0.029850746268656716	0.0	66	1	KCNT2	protein_coding	0	false	3.05594590922035	ENSG00000162687	343450	2.0	1	0.043560959828191	0	false	0	ENSG00000162687	0
2042.21137806997	4.0	0.0	0.25	0.0	7	1	GBP2	protein_coding	0	false	1.31104312437175	ENSG00000162645	2634	13.0	1	0.0177424529989686	0	false	0	ENSG00000162645	0
129.81069409598	18.0	0.012881931458626442	0.05555555555555555	0.0	35	2	NDUFB1	protein_coding	1	false	-0.0726940553004909	ENSG00000183648	4707	1.5	1	0.923937149584678	0	false	0	ENSG00000183648	43400
1472.34788190989	18.5	0.0	0.05405405405405406	0.0	36	1	ALPL	protein_coding	0	false	2.52017033309139	ENSG00000162551	249	2.0	1	0.00440963380288755	0	false	0	ENSG00000162551	0
522.196968523872	2.0	0.0	0.5	0.0	3	1	KLHL21	protein_coding	0	false	1.06924336389084	ENSG00000162413	9903	188.0	1	0.0296002375792888	0	false	0	ENSG00000162413	0
132.443939585872	7.0	0.0	0.14285714285714285	0.0	13	1	TPCN2	protein_coding	0	false	1.17742902938562	ENSG00000162341	219931	5.0	1	0.0254223086406246	0	false	0	ENSG00000162341	0
188.76856293191	3.0	0.033611749271310096	0.3333333333333333	0.0	5	3	CWC22	protein_coding	2	false	-0.138524635507263	ENSG00000163510	57703	2.0	1	0.768761471665586	0	false	0	ENSG00000163510	113240
76.5281267730796	3.5	0.0021976456340937825	0.2857142857142857	0.0	6	2	CARD9	protein_coding	1	false	0.251779582318641	ENSG00000187796	64170	2.5	1	0.845631373605814	0	false	0	ENSG00000187796	7404
14.853991267677	4.0	0.0	0.25	0.0	7	1	BICDL2	protein_coding	0	false	3.69774961700102	ENSG00000162069	146439	2.0	1	0.0102043259372225	0	false	0	ENSG00000162069	0
251.812343822113	5.0	0.0	0.2	0.0	9	1	CXCL16	protein_coding	0	false	1.40131053404231	ENSG00000161921	58191	5.0	1	0.0305286320692405	0	false	0	ENSG00000161921	0
218.313669564918	2.0	0.004048903848551228	0.5	0.0	3	4	RBM10	protein_coding	3	false	0.312535699009641	ENSG00000182872	8241	47.75	1	0.394657493272745	0	false	0	ENSG00000182872	13641
7.19818810089743	5.0	0.07880269273922103	0.2	0.0	9	2	TMEM30B	protein_coding	1	false	-0.726611472849276	ENSG00000182107	161291	5.0	1	0.734764467455819	0	false	0	ENSG00000182107	265491
10.7029328862237	5.5	0.0839106456993939	0.18181818181818182	0.0	10	3	TMEM143	protein_coding	2	false	-0.680248854887713	ENSG00000161558	55260	2.6666666666666665	1	0.664560714145197	0	false	0	ENSG00000161558	282700
996.340780868713	14.0	0.0	0.07142857142857142	0.0	27	1	ACOX1	protein_coding	0	false	1.29704457404674	ENSG00000161533	51	4.0	1	0.0169121340531862	0	false	0	ENSG00000161533	0
21.4367545264907	11.0	0.0	0.09090909090909091	0.0	21	1	FDXR	protein_coding	0	false	1.26133197931922	ENSG00000161513	2232	3.0	1	0.022555220237569	0	false	0	ENSG00000161513	0
55.8554054279399	12.0	0.20836850634895193	0.08333333333333333	0.0	23	2	ZBED6CL	protein_coding	1	false	-0.235662207656195	ENSG00000188707	113763	4.0	1	0.73046160233509	0	false	0	ENSG00000188707	702006
135.162566256226	12.5	0.2087015369272141	0.08	0.0	24	2	ABCF3	protein_coding	1	false	0.112926105929137	ENSG00000161204	55324	2.0	1	0.852607922651424	0	false	0	ENSG00000161204	703128
161.883685547417	17.5	0.0	0.05714285714285714	0.0	34	1	FBXL13	protein_coding	0	false	1.82641042949811	ENSG00000161040	222235	2.0	1	0.0191987292050305	0	false	0	ENSG00000161040	0
840.527896267732	2.0	0.0	0.5	0.0	3	1	ORAI2	protein_coding	0	false	1.26640241387009	ENSG00000160991	80228	188.0	1	0.00249118290909725	0	false	0	ENSG00000160991	0
71.198879104019	2.0	0.001575216826058307	0.5	0.0	3	2	CPSF4	protein_coding	1	false	0.128604290976354	ENSG00000160917	10898	3.5	1	0.874287494670534	0	false	0	ENSG00000160917	5307
1371.81492762259	7.0	0.0	0.14285714285714285	0.0	13	1	HK3	protein_coding	0	false	1.97728091423762	ENSG00000160883	3101	2.0	1	1.40436965839464E-6	0	false	0	ENSG00000160883	0
171.718205829984	6.5	0.00791081191786433	0.15384615384615385	0.0	12	2	KIAA1143	protein_coding	1	false	-0.458240435716807	ENSG00000163807	57456	2.0	1	0.607397234963988	0	false	0	ENSG00000163807	26652
3415.84331213842	4.5	0.0	0.2222222222222222	0.0	8	1	NBEAL2	protein_coding	0	false	1.50205049494103	ENSG00000160796	23218	2.0	1	6.96642662272769E-6	0	false	0	ENSG00000160796	0
261.131205884542	2.0	0.0	0.5	0.0	3	1	LMNA	protein_coding	0	false	1.45350956496864	ENSG00000160789	4000	188.0	1	0.0106708098933202	0	false	0	ENSG00000160789	0
158.324022361167	2.0	0.001082794607397909	0.5	0.0	3	2	IMPDH2	protein_coding	1	false	-0.47264022627697	ENSG00000178035	3615	94.5	1	0.344350101942664	0	false	0	ENSG00000178035	3648
415.752654401083	2.5	0.0	0.4	0.0	4	1	SLC25A44	protein_coding	0	false	1.39669736290039	ENSG00000160785	9673	2.0	1	0.00236167937457439	0	false	0	ENSG00000160785	0
30.6368196276278	16.0	0.0	0.0625	0.0	31	1	PAQR6	protein_coding	0	false	2.24616858006328	ENSG00000160781	79957	2.0	1	0.0224760863736883	0	false	0	ENSG00000160781	0
1955.19419161751	21.0	0.0	0.047619047619047616	0.0	41	1	IL6R	protein_coding	0	false	1.20341804165963	ENSG00000160712	3570	9.0	1	0.0497479267535129	0	false	0	ENSG00000160712	0
3991.84078608053	2.0	0.0	0.5	0.0	3	1	ADAR	protein_coding	0	false	1.29308480646875	ENSG00000160710	103	188.0	1	0.00708575583360324	0	false	0	ENSG00000160710	0
124.158180866524	6.5	0.0	0.15384615384615385	0.0	12	1	NLRX1	protein_coding	0	false	1.26048160182357	ENSG00000160703	79671	2.0	1	0.0110448042869144	0	false	0	ENSG00000160703	0
418.183311074399	5.5	0.016123191632087287	0.18181818181818182	0.0	10	2	MPZL3	protein_coding	1	false	0.88925990497713	ENSG00000160588	196264	2.5	1	0.250080628067758	0	false	0	ENSG00000160588	54320
1194.94766541459	14.5	0.0	0.06896551724137931	0.0	28	1	SHKBP1	protein_coding	0	false	1.30914237515833	ENSG00000160410	92799	3.0	1	0.00550097228667259	0	false	0	ENSG00000160410	0
78.9010801259126	4.0	0.0025098989035517326	0.25	0.0	7	2	CZIB	protein_coding	1	false	-0.415170707936132	ENSG00000162384	54987	1.5	1	0.360671795595708	0	false	0	ENSG00000162384	8456
30.470106807498	4.5	0.0	0.2222222222222222	0.0	8	1	CACFD1	protein_coding	0	false	1.93505605977777	ENSG00000160325	11094	2.0	1	0.0325827963950929	0	false	0	ENSG00000160325	0
245.644214580901	6.0	0.0	0.16666666666666666	0.0	11	1	ABCG1	protein_coding	0	false	1.5486664746983	ENSG00000160179	9619	2.0	1	0.0468123701607041	0	false	0	ENSG00000160179	0
72.6260066266564	9.5	0.006437997542341187	0.10526315789473684	0.0	18	2	TMEM203	protein_coding	1	false	0.203292955755706	ENSG00000187713	94107	2.0	1	0.807211512373664	0	false	0	ENSG00000187713	21690
75.1338856322713	10.0	0.0	0.1	0.0	19	1	TMEM234	protein_coding	0	false	1.34549671255477	ENSG00000160055	56063	2.0	1	0.00216311811859516	0	false	0	ENSG00000160055	0
1741.76944605766	5.0	0.0032136560346209325	0.2	0.0	9	2	CCNDBP1	protein_coding	1	false	-0.294433647299519	ENSG00000166946	23582	2.0	1	0.767176164659631	0	false	0	ENSG00000166946	10827
140.171726877375	5.5	0.0	0.18181818181818182	0.0	10	1	ZNF230	protein_coding	0	false	1.3438414965403	ENSG00000159882	7773	2.0	1	0.020482053340962	0	false	0	ENSG00000159882	0
1761.63648497331	2.0	0.0	0.5	0.0	3	1	ZYX	protein_coding	0	false	1.27650507485525	ENSG00000159840	7791	11.0	1	0.00109721042970587	0	false	0	ENSG00000159840	0
9.14947274369118	6.0	0.005828035119588253	0.16666666666666666	0.0	11	2	CHCHD6	protein_coding	1	false	-0.517956297095977	ENSG00000159685	84303	1.5	1	0.833328498726209	0	false	0	ENSG00000159685	19635
63.9338861505532	8.0	0.0	0.1250	0.0	15	1	CCDC17	protein_coding	0	false	1.45448014285498	ENSG00000159588	149483	2.0	1	0.00729524125130146	0	false	0	ENSG00000159588	0
137.98698351936	3.5	0.0	0.2857142857142857	0.0	6	1	RGL4	protein_coding	0	false	1.53402436184889	ENSG00000159496	266747	2.0	1	0.0399265257928412	0	false	0	ENSG00000159496	0
137.750217494263	8.5	0.6414798192967771	0.11764705882352941	0.0	16	4	RNF5	protein_coding	3	false	-0.268692280373142	ENSG00000204308	6048	2.5	1	0.788869633548273	0	false	0	ENSG00000204308	2161184
35.7110747742668	6.0	0.006376556072020088	0.16666666666666666	0.0	11	2	C1QA	protein_coding	1	false	0.653930075571221	ENSG00000173372	712	2.5	1	0.670554495149972	0	false	0	ENSG00000173372	21483
472.6823909069	2.0	0.0	0.5	0.0	3	1	HK2	protein_coding	0	false	1.53972130863419	ENSG00000159399	3099	188.0	1	6.37227909164332E-4	0	false	0	ENSG00000159399	0
745.560936594607	13.0	0.0	0.07692307692307693	0.0	25	1	PADI4	protein_coding	0	false	2.19972304743941	ENSG00000159339	23569	2.0	1	1.56034489940072E-5	0	false	0	ENSG00000159339	0
1105.08042232006	4.5	0.0	0.2222222222222222	0.0	8	1	IFNGR2	protein_coding	0	false	1.2118194478195	ENSG00000159128	3460	22.0	1	0.0218735119080055	0	false	0	ENSG00000159128	0
199.724635546506	16.0	1.2688518459154778	0.0625	0.0	31	2	IFNAR2	protein_coding	1	false	0.920429667317616	ENSG00000159110	3455	2.5	1	0.0279260048557047	0	false	0	ENSG00000159110	4274838
260.241137375371	6.0	0.011234884507844918	0.16666666666666666	0.0	11	2	PAXBP1	protein_coding	1	false	0.0367030866820205	ENSG00000159086	94104	2.0	1	0.948953908131079	0	false	0	ENSG00000159086	37851
18.620564753101	11.5	0.011427519842329908	0.08695652173913043	0.0	22	2	CFAP298	protein_coding	1	false	-0.103925320953623	ENSG00000159079	56683	2.5	1	0.941642362026306	0	false	0	ENSG00000159079	38500
415.619561068102	4.0	0.0024704220168236834	0.25	0.0	7	2	NRAS	protein_coding	1	false	-0.0770690559866694	ENSG00000213281	4893	4.0	1	0.875368314778234	0	false	0	ENSG00000213281	8323
31.4567148074241	4.5	0.0	0.2222222222222222	0.0	8	1	MPZ	protein_coding	0	false	2.17928141765503	ENSG00000158887	4359	2.0	1	0.00868562414213698	0	false	0	ENSG00000158887	0
1176.33663338143	10.0	0.0	0.1	0.0	19	1	FCER1G	protein_coding	0	false	1.08325347872177	ENSG00000158869	2207	8.0	1	0.0498174031771445	0	false	0	ENSG00000158869	0
289.653994476198	31.0	0.24615026149727223	0.03225806451612903	0.0	61	2	CDA	protein_coding	1	false	2.07532903742453	ENSG00000158825	978	3.0	1	4.74471048821766E-4	0	false	0	ENSG00000158825	829295
147.340614776011	11.0	0.019503659774536518	0.09090909090909091	0.0	21	2	MUS81	protein_coding	1	false	0.336592265591643	ENSG00000172732	80198	2.5	1	0.567853905830714	0	false	0	ENSG00000172732	65709
727.341992880471	4.0	0.0	0.25	0.0	7	1	NCF1	protein_coding	0	false	1.49248211571928	ENSG00000158517	653361	13.0	1	0.0197486957670011	0	false	0	ENSG00000158517	0
1049.76998492666	2.0	0.0	0.5	0.0	3	1	B4GALT5	protein_coding	0	false	1.87872777265716	ENSG00000158470	9334	10.0	1	2.78726242420782E-4	0	false	0	ENSG00000158470	0
200.605460034224	5.0	0.012900037399155847	0.2	0.0	9	2	DPY19L3	protein_coding	1	false	0.876178980702386	ENSG00000178904	147991	3.0	1	0.0587925811752433	0	false	0	ENSG00000178904	43461
24.0274200603361	2.5	0.0	0.4	0.0	4	1	SHROOM4	protein_coding	0	false	2.17921518189743	ENSG00000158352	57477	2.0	1	0.0423032859147076	0	false	0	ENSG00000158352	0
462.624338513408	28.0	0.0	0.03571428571428571	0.0	55	1	ABHD3	protein_coding	0	false	1.3680527183209	ENSG00000158201	171586	6.0	1	0.0166346116745848	0	false	0	ENSG00000158201	0
83.0514480441276	23.0	0.0	0.043478260869565216	0.0	45	1	GALNT14	protein_coding	0	false	2.69295970224749	ENSG00000158089	79623	4.0	1	0.00459804377121428	0	false	0	ENSG00000158089	0
533.984278052661	1.5	0.0010822009700035024	0.6666666666666666	0.0	2	2	SPPL3	protein_coding	1	false	-0.720041925639901	ENSG00000157837	121665	4.5	1	0.289466691673289	0	false	0	ENSG00000157837	3646
300.263692169346	10.0	0.0	0.1	0.0	19	1	SLC37A3	protein_coding	0	false	1.7207308967737	ENSG00000157800	84255	6.0	1	0.00162664728729023	0	false	0	ENSG00000157800	0
163.505921254208	22.5	1.048928781321793	0.044444444444444446	0.0	44	4	SLC9A6	protein_coding	3	false	-0.141417179098677	ENSG00000198689	10479	2.0	1	0.787114733382924	0	false	0	ENSG00000198689	3533904
682.496914249904	23.0	0.0	0.043478260869565216	0.0	45	1	TMEM164	protein_coding	0	false	1.18850593602885	ENSG00000157600	84187	4.0	1	0.00380431991499178	0	false	0	ENSG00000157600	0
102.158816473394	8.0	0.07959787002902886	0.1250	0.0	15	3	CDK10	protein_coding	2	false	0.0177457468452575	ENSG00000185324	8558	1.6666666666666667	1	0.985424985914014	0	false	0	ENSG00000185324	268170
667.124158932253	8.5	0.0	0.11764705882352941	0.0	16	1	ETS2	protein_coding	0	false	1.57080696452079	ENSG00000157557	2114	3.0	1	0.0128112545325179	0	false	0	ENSG00000157557	0
1612.20518035644	17.0	0.0	0.058823529411764705	0.0	33	1	KCNJ15	protein_coding	0	false	2.36252296332499	ENSG00000157551	3772	2.0	1	0.00647675494757578	0	false	0	ENSG00000157551	0
5474.34310732131	10.0	0.0	0.1	0.0	19	1	TSC22D3	protein_coding	0	false	1.6206613079781	ENSG00000157514	1831	8.0	1	0.00211844843273977	0	false	0	ENSG00000157514	0
8.90130111543341	30.0	0.0	0.03333333333333333	0.0	59	1	CLEC18A	protein_coding	0	false	2.86106191907259	ENSG00000157322	348174	5.0	1	0.0381436881835793	0	false	0	ENSG00000157322	0
358.694375309582	6.5	0.0	0.15384615384615385	0.0	12	1	MAPK13	protein_coding	0	false	1.15304093370267	ENSG00000156711	5603	3.0	1	0.00742379782586068	0	false	0	ENSG00000156711	0
626.646527702281	4.0	0.002532753943236392	0.25	0.0	7	2	NPTN	protein_coding	1	false	0.564458524363138	ENSG00000156642	27020	2.0	1	0.210122152189692	0	false	0	ENSG00000156642	8533
130.839069901452	2.0	0.0	0.5	0.0	3	1	TDRD9	protein_coding	0	false	2.76283449044097	ENSG00000156414	122402	188.0	1	6.74250035538822E-7	0	false	0	ENSG00000156414	0
70.0299851201832	6.0	0.027073427009314168	0.16666666666666666	0.0	11	3	DPY19L4	protein_coding	2	false	-0.498920695332004	ENSG00000156162	286148	2.0	1	0.470648212657852	0	false	0	ENSG00000156162	91212
24.9457256910529	10.0	0.0	0.1	0.0	19	1	KCNMA1	protein_coding	0	false	3.43983866209472	ENSG00000156113	3778	3.0	1	0.0334154932020845	0	false	0	ENSG00000156113	0
278.331540578315	12.0	0.015537865161202234	0.08333333333333333	0.0	23	2	CLIC2	protein_coding	1	false	0.561371060814607	ENSG00000155962	1193	2.0	1	0.73037444686686	0	false	0	ENSG00000155962	52348
416.19872691315	5.0	0.4161591066944489	0.2	0.0	9	5	MYO15B	protein_coding	4	false	0.637123601256558	ENSG00000266714	80022	2.0	1	0.208397490051034	0	false	0	ENSG00000266714	1402065
2289.50265910722	5.5	0.0	0.18181818181818182	0.0	10	1	SLA	protein_coding	0	false	1.33695594840344	ENSG00000155926	6503	5.0	1	0.0122499275270194	0	false	0	ENSG00000155926	0
132.124924261494	2.0	0.0	0.5	0.0	3	1	PXYLP1	protein_coding	0	false	1.22684893172215	ENSG00000155893	92370	10.0	1	0.0440573583776749	0	false	0	ENSG00000155893	0
26.6067833546688	16.5	0.0423999572581076	0.06060606060606061	0.0	32	2	RNF152	protein_coding	1	false	-0.928558354949098	ENSG00000176641	220441	4.0	1	0.566333463869749	0	false	0	ENSG00000176641	142848
239.03746784805	14.0	0.00928834749158519	0.07142857142857142	0.0	27	2	DAPK1	protein_coding	1	false	0.0169209830779229	ENSG00000196730	1612	3.0	1	0.987242447712385	0	false	0	ENSG00000196730	31293
1557.63337499488	14.5	0.0	0.06896551724137931	0.0	28	1	FAM126B	protein_coding	0	false	1.63930299900198	ENSG00000155744	285172	2.0	1	0.00503648904646032	0	false	0	ENSG00000155744	0
1931.64880859754	16.0	0.0	0.0625	0.0	31	1	PIK3AP1	protein_coding	0	false	1.11199626795413	ENSG00000155629	118788	4.0	1	0.022555497025228	0	false	0	ENSG00000155629	0
1418.95681260576	12.0	0.04799261515081358	0.08333333333333333	0.0	23	2	CASP4	protein_coding	1	false	1.02472011221102	ENSG00000196954	837	6.0	1	0.0548757804091354	0	false	0	ENSG00000196954	161690
16.2420260338631	7.0	0.07755872557924168	0.14285714285714285	0.0	13	2	GRAMD2B	protein_coding	1	false	-0.508056599851371	ENSG00000155324	65983	2.0	1	0.760961386679599	0	false	0	ENSG00000155324	261300
733.370816014372	16.0	0.0	0.0625	0.0	31	1	SAMSN1	protein_coding	0	false	1.49934537009834	ENSG00000155307		2.0	1	0.0395780828454077	0	false	0	ENSG00000155307	0
455.579933287868	21.0	0.0	0.047619047619047616	0.0	41	1	PIP4P2	protein_coding	0	false	1.20983969745169	ENSG00000155099	55529	9.0	1	0.0146189495650863	0	false	0	ENSG00000155099	0
35.1127041593889	7.0	0.04849156738081245	0.14285714285714285	0.0	13	4	SPHK1	protein_coding	3	false	0.108453079489988	ENSG00000176170	8877	2.25	1	0.918571685103896	0	false	0	ENSG00000176170	163371
138.583557660537	11.5	0.08072400016621846	0.08695652173913043	0.0	22	2	LONRF1	protein_coding	1	false	0.921665993117005	ENSG00000154359	91694	4.0	1	0.160043145705081	0	false	0	ENSG00000154359	271964
29.6910152367949	6.5	0.04569464479706505	0.15384615384615385	0.0	12	3	PGM5	protein_coding	2	false	0.494499932994191	ENSG00000154330	5239	1.6666666666666667	1	0.823263347687351	0	false	0	ENSG00000154330	153948
199.794092590453	5.5	0.004752067342226021	0.18181818181818182	0.0	10	2	TOMM70	protein_coding	1	false	-0.37954356851963	ENSG00000154174	9868	1.5	1	0.309075185044756	0	false	0	ENSG00000154174	16010
393.84824588313	2.0	0.0	0.5	0.0	3	1	UBASH3B	protein_coding	0	false	1.1206589615132	ENSG00000154127	84959	188.0	1	0.00520190696021216	0	false	0	ENSG00000154127	0
177.161975062482	5.5	0.0040990662083785975	0.18181818181818182	0.0	10	2	CEBPG	protein_coding	1	false	0.101209092440243	ENSG00000153879	1054	2.5	1	0.902003020574233	0	false	0	ENSG00000153879	13810
190.116522614211	8.5	0.00789775189518738	0.11764705882352941	0.0	16	2	CMTM7	protein_coding	1	false	0.228647810884522	ENSG00000153551	112616	2.5	1	0.76595522787248	0	false	0	ENSG00000153551	26608
69.2184064483971	22.0	0.06428825844597602	0.045454545454545456	0.0	43	3	PPIL3	protein_coding	2	false	-0.873104429890906	ENSG00000240344	53938	2.0	1	0.0517210035909208	0	false	0	ENSG00000240344	216591
1569.41823636576	22.5	0.021327017031456844	0.044444444444444446	0.0	44	2	CYRIB	protein_coding	1	false	0.789654126970669	ENSG00000153310	51571	2.0	1	0.0752899186897835	0	false	0	ENSG00000153310	71852
64.2416585269862	2.5	0.0	0.4	0.0	4	1	PRDM8	protein_coding	0	false	1.40610169958385	ENSG00000152784	56978	3.0	1	0.0288517606525916	0	false	0	ENSG00000152784	0
65.8121449453796	7.5	0.0	0.13333333333333333	0.0	14	1	ANKRD22	protein_coding	0	false	2.98597362517982	ENSG00000152766	118932	3.0	1	0.0114772708642493	0	false	0	ENSG00000152766	0
122.09708375791	4.0	0.018138590586098197	0.25	0.0	7	2	EXOSC6	protein_coding	1	false	-1.09636585039303	ENSG00000223496	118460	2.5	1	0.00500299187422863	0	false	0	ENSG00000223496	61110
171.486019421281	28.0	0.02734442247986085	0.03571428571428571	0.0	55	2	SLC30A6	protein_coding	1	false	-0.0910216689246517	ENSG00000152683	55676	3.5	1	0.850271843743864	0	false	0	ENSG00000152683	92125
67.156318551299	4.5	0.24070096703531546	0.2222222222222222	0.0	8	2	ETFRF1	protein_coding	1	false	-0.269630909654139	ENSG00000205707	144363	2.0	1	0.752628757367436	0	false	0	ENSG00000205707	810936
71.4174478891228	5.0	0.2677458994496981	0.2	0.0	9	2	NADK2	protein_coding	1	false	-0.427492970899835	ENSG00000152620	133686	2.0	1	0.506023994961389	0	false	0	ENSG00000152620	902052
56.833436809962	8.0	0.027795586899609977	0.1250	0.0	15	4	IRF2BP1	protein_coding	3	false	-0.272709835130395	ENSG00000170604	26145	1.75	1	0.672457648519145	0	false	0	ENSG00000170604	93645
5180.32339668214	8.5	0.008144705051260588	0.11764705882352941	0.0	16	2	MBNL1	protein_coding	1	false	0.141168948852478	ENSG00000152601	4154	2.5	1	0.779986166422384	0	false	0	ENSG00000152601	27440
1080.49482162291	3.5	0.005000801410482448	0.2857142857142857	0.0	6	3	RNF123	protein_coding	2	false	-1.33983777519855	ENSG00000164068	63891	5.0	1	0.122578438625781	0	false	0	ENSG00000164068	16848
80.5947326534675	4.0	0.0	0.25	0.0	7	1	OLAH	protein_coding	0	false	4.69303750631218	ENSG00000152463	55301	3.0	1	0.0150899956204015	0	false	0	ENSG00000152463	0
570.675477143969	21.5	0.0	0.046511627906976744	0.0	42	1	PSTPIP2	protein_coding	0	false	1.37051537861445	ENSG00000152229	9050	2.0	1	0.00401897174509924	0	false	0	ENSG00000152229	0
231.683121038617	10.0	0.0	0.1	0.0	19	1	ARL11	protein_coding	0	false	1.38487792844687	ENSG00000152213	115761	2.0	1	0.0204953052224484	0	false	0	ENSG00000152213	0
844.273986923588	4.5	0.0	0.2222222222222222	0.0	8	1	GLT1D1	protein_coding	0	false	1.28285537124712	ENSG00000151948	144423	3.0	1	0.0171058824016727	0	false	0	ENSG00000151948	0
406.237817089736	1.5	0.0010424272645782502	0.6666666666666666	0.0	2	2	TIAL1	protein_coding	1	false	-0.156124371259638	ENSG00000151923	7073	3.0	1	0.716206392995777	0	false	0	ENSG00000151923	3512
345.856470605742	22.5	0.014744765602274817	0.044444444444444446	0.0	44	2	SUGT1	protein_coding	1	false	-0.605392047136478	ENSG00000165416	10910	2.0	1	0.139626406770185	0	false	0	ENSG00000165416	49676
124.157412314445	23.0	0.0	0.043478260869565216	0.0	45	1	AMN1	protein_coding	0	false	1.46800241020295	ENSG00000151743	196394	2.0	1	0.00665304230812587	0	false	0	ENSG00000151743	0
8028.53440142373	10.5	0.0	0.09523809523809523	0.0	20	1	ACSL1	protein_coding	0	false	2.67965971116177	ENSG00000151726	2180	2.0	1	6.74464755941789E-5	0	false	0	ENSG00000151726	0
715.814445026145	16.0	0.0	0.0625	0.0	31	1	ADAM17	protein_coding	0	false	1.03144936749558	ENSG00000151694	6868	7.0	1	0.0235680234161749	0	false	0	ENSG00000151694	0
146.338125024634	15.5	0.01081904151306299	0.06451612903225806	0.0	30	2	RNF144A	protein_coding	1	false	-0.0450262714415469	ENSG00000151692	9781	3.0	1	0.955231501852142	0	false	0	ENSG00000151692	36450
2480.87525526255	8.0	0.0	0.1250	0.0	15	1	ADAM8	protein_coding	0	false	1.45920804673296	ENSG00000151651	101	2.0	1	0.0021843210118103	0	false	0	ENSG00000151651	0
982.494381762473	2.5	0.001333309587837557	0.4	0.0	4	2	ZFP36L2	protein_coding	1	false	-0.358033119385309	ENSG00000152518	678	2.5	1	0.438330450788974	0	false	0	ENSG00000152518	4492
654.477851890202	3.0	0.0	0.3333333333333333	0.0	5	1	FHIP2A	protein_coding	0	false	1.01517661987414	ENSG00000151553	57700	2.0	1	0.0333641369593224	0	false	0	ENSG00000151553	0
155.970816254137	4.0	0.007097528687527084	0.25	0.0	7	2	ANK3	protein_coding	1	false	0.0885673552166496	ENSG00000151150	288	4.5	1	0.954241132424875	0	false	0	ENSG00000151150	23912
1704.76514690989	10.0	0.34910538844662903	0.1	0.0	19	3	FCGR3A	protein_coding	2	false	0.706928560200773	ENSG00000203747	2214	3.3333333333333335	1	0.483332098242055	0	false	0	ENSG00000203747	1176157
23.5504305598137	10.5	0.35841451324701845	0.09523809523809523	0.0	20	2	NOCT	protein_coding	1	false	0.341587106844576	ENSG00000151014	25819	2.5	1	0.751391711738049	0	false	0	ENSG00000151014	1207520
14.859857945237	15.0	0.02918024612206372	0.06666666666666667	0.0	29	4	KLRC2	protein_coding	3	false	-0.0214001991511246	ENSG00000205809	3822	1.5	1	0.994152933942001	0	false	0	ENSG00000205809	98310
45.1943461342903	15.5	0.0	0.06451612903225806	0.0	30	1	SLC7A11	protein_coding	0	false	1.60188056125729	ENSG00000151012	23657	4.0	1	0.0487098062908547	0	false	0	ENSG00000151012	0
8121.46000673915	3.5	0.0032145464907125426	0.2857142857142857	0.0	6	2	PIP4K2A	protein_coding	1	false	-0.906111396264021	ENSG00000150867	5305	2.5	1	0.39002955484272	0	false	0	ENSG00000150867	10830
55.1287700422157	5.5	0.0037488201456786162	0.18181818181818182	0.0	10	2	TMEM218	protein_coding	1	false	0.587590391308585	ENSG00000150433	219854	2.0	1	0.452829331001433	0	false	0	ENSG00000150433	12630
357.607087515204	12.0	0.0	0.08333333333333333	0.0	23	1	TMCO3	protein_coding	0	false	1.14995307318277	ENSG00000150403	55002	6.0	1	0.00168088669617464	0	false	0	ENSG00000150403	0
74.9572433090104	4.5	0.002642873679898844	0.2222222222222222	0.0	8	2	JAGN1	protein_coding	1	false	-0.0840534492812458	ENSG00000171135	84522	11.5	1	0.920087026483297	0	false	0	ENSG00000171135	8904
206.369755456917	5.0	0.0	0.2	0.0	9	1	FCGR1A	protein_coding	0	false	2.38013232662994	ENSG00000150337	2209	2.0	1	3.7541802164433E-4	0	false	0	ENSG00000150337	0
169.482557940673	2.0	0.0	0.5	0.0	3	1	ALDOA	protein_coding	0	false	1.05210900957188	ENSG00000149925	226	188.0	1	0.0474440326658355	0	false	0	ENSG00000149925	0
1784.23615830968	2.5	0.0	0.4	0.0	4	1	FERMT3	protein_coding	0	false	1.04994502210527	ENSG00000149781	83706	4.0	1	0.00807548553894371	0	false	0	ENSG00000149781	0
108.378641131138	4.0	0.09118953061091224	0.25	0.0	7	2	NUDT22	protein_coding	1	false	0.433682236945958	ENSG00000149761	84304	3.0	1	0.265808239135056	0	false	0	ENSG00000149761	307223
1679.646793824	29.0	0.04596801481718936	0.034482758620689655	0.0	57	2	ZDHHC18	protein_coding	1	false	1.64983623927125	ENSG00000204160	84243	3.0	1	0.0120449894217107	0	false	0	ENSG00000204160	154869
260.936711696872	29.5	0.027699714460413288	0.03389830508474576	0.0	58	2	SIDT2	protein_coding	1	false	0.0648814147766421	ENSG00000149577	51092	1.5	1	0.937662812409757	0	false	0	ENSG00000149577	93322
347.681565956269	2.5	0.003362362201919823	0.4	0.0	4	3	MPHOSPH8	protein_coding	2	false	0.00651141478751905	ENSG00000196199	54737	3.0	1	0.99072227025377	0	false	0	ENSG00000196199	11328
183.316000340224	3.0	0.0	0.3333333333333333	0.0	5	1	ESAM	protein_coding	0	false	1.94557371333872	ENSG00000149564	90952	3.0	1	7.72859877339993E-4	0	false	0	ENSG00000149564	0
31.9246010128859	11.5	0.37845333713261264	0.08695652173913043	0.0	22	6	DNAAF5	protein_coding	5	false	-0.806040154623595	ENSG00000164818	54919	1.8333333333333333	1	0.415926777962978	0	false	0	ENSG00000164818	1275032
97.0641238819367	8.5	0.08131882483541403	0.11764705882352941	0.0	16	2	MS4A3	protein_coding	1	false	2.81270470618693	ENSG00000149516	932	2.5	1	0.0894432849202454	0	false	0	ENSG00000149516	273968
59.5336127771283	3.5	0.008414810065715659	0.2857142857142857	0.0	6	2	RCAN1	protein_coding	1	false	0.114114787535331	ENSG00000159200	1827	2.0	1	0.91065877408396	0	false	0	ENSG00000159200	28350
1009.33591618432	3.5	0.5410963295399903	0.2857142857142857	0.0	6	7	MARCKS	protein_coding	6	false	1.24979623548526	ENSG00000277443	4082	4.857142857142857	1	0.0599792923232412	0	false	0	ENSG00000277443	1822986
2866.57883061822	2.0	0.0	0.5	0.0	3	1	PTPRJ	protein_coding	0	false	1.12938507007517	ENSG00000149177	5795	188.0	1	0.00442609938366599	0	false	0	ENSG00000149177	0
381.13251653861	4.0	0.002283426237585558	0.25	0.0	7	2	ARFGAP2	protein_coding	1	false	0.151807611011013	ENSG00000149182	84364	4.0	1	0.765546790010056	0	false	0	ENSG00000149182	7693
183.173103822251	4.5	0.0	0.2222222222222222	0.0	8	1	SERPING1	protein_coding	0	false	3.99873239774946	ENSG00000149131	710	2.0	1	6.57205748815613E-4	0	false	0	ENSG00000149131	0
333.15792771334	2.5	0.0	0.4	0.0	4	1	ADM	protein_coding	0	false	2.0614464968456	ENSG00000148926	133	3.0	1	0.00342318886578553	0	false	0	ENSG00000148926	0
795.103710354589	2.0	0.0	0.5	0.0	3	1	ITPRIP	protein_coding	0	false	1.30940773450601	ENSG00000148841	85450	188.0	1	0.00342674595468088	0	false	0	ENSG00000148841	0
45.716156444312	19.0	1.374280066249933	0.05263157894736842	0.0	37	3	COMMD3	protein_coding	2	false	-0.0556694601255745	ENSG00000148444	23412	2.0	1	0.961830339913841	0	false	0	ENSG00000148444	4630032
1960.91881784995	2.0	0.0	0.5	0.0	3	1	NOTCH1	protein_coding	0	false	1.03229051941441	ENSG00000148400	4851	188.0	1	0.0370496906127562	0	false	0	ENSG00000148400	0
9.08138093198177	9.0	0.011232213139570088	0.1111111111111111	0.0	17	2	DECR2	protein_coding	1	false	-1.33002492304458	ENSG00000242612	26063	3.0	1	0.285238922689093	0	false	0	ENSG00000242612	37842
345.572777357135	9.5	0.006053320510765614	0.10526315789473684	0.0	18	2	GPR107	protein_coding	1	false	0.648182728188983	ENSG00000148358	57720	1.5	1	0.0570588972075206	0	false	0	ENSG00000148358	20394
2380.940756005	15.0	0.061700296225059806	0.06666666666666667	0.0	29	5	UBE2H	protein_coding	4	false	-0.37428778002474	ENSG00000186591	7328	2.0	1	0.749370199651588	0	false	0	ENSG00000186591	207872
68.9182380954342	2.0	0.001335684137415184	0.5	0.0	3	2	PTGES2	protein_coding	1	false	0.0834824855967389	ENSG00000148334	80142	94.5	1	0.943505659117121	0	false	0	ENSG00000148334	4500
1134.18948436144	3.5	0.0	0.2857142857142857	0.0	6	1	GSN	protein_coding	0	false	1.59649683577111	ENSG00000148180	2934	13.0	1	0.00122122252327459	0	false	0	ENSG00000148180	0
553.82958757163	21.5	0.0	0.046511627906976744	0.0	42	1	MFSD14B	protein_coding	0	false	1.20691456312112	ENSG00000148110	84641	9.0	1	0.0199725428873671	0	false	0	ENSG00000148110	0
1144.30109905599	5.0	0.0	0.2	0.0	9	1	C9orf72	protein_coding	0	false	1.44618214019284	ENSG00000147894	203228	5.0	1	0.0077443526855803	0	false	0	ENSG00000147894	0
29.7013310968639	11.5	0.0	0.08695652173913043	0.0	22	1	CDKN2B	protein_coding	0	false	1.7708245411191	ENSG00000147883	1030	3.0	1	0.00463661133429726	0	false	0	ENSG00000147883	0
94.5942386319213	16.5	0.02035463897941859	0.06060606060606061	0.0	32	3	TMEM106A	protein_coding	2	false	0.692139215402935	ENSG00000184988	113277	2.0	1	0.130882098984026	0	false	0	ENSG00000184988	68576
2150.10640979091	2.0	0.0	0.5	0.0	3	1	DOCK5	protein_coding	0	false	1.42012416002188	ENSG00000147459	80005	188.0	1	0.00879935492137732	0	false	0	ENSG00000147459	0
2159.75254158082	2.0	0.0	0.5	0.0	3	1	ATP6V1B2	protein_coding	0	false	1.38129321122585	ENSG00000147416	526	188.0	1	0.0126007661377042	0	false	0	ENSG00000147416	0
407.048794229025	30.0	0.0	0.03333333333333333	0.0	59	1	CSGALNACT1	protein_coding	0	false	1.36539650567777	ENSG00000147408	55790	5.0	1	0.0134823061806415	0	false	0	ENSG00000147408	0
150.685794841342	16.5	0.07202483778858197	0.06060606060606061	0.0	32	3	H2BC10	protein_coding	2	false	-0.263538599980878	ENSG00000278588	8346	2.3333333333333335	1	0.776480782370719	0	false	0	ENSG00000278588	242656
95.4136946485898	17.0	0.011989100817438692	0.058823529411764705	0.0	33	2	CETN2	protein_coding	1	false	-0.217097981234688	ENSG00000147400	1069	2.0	1	0.816738287250557	0	false	0	ENSG00000147400	40392
609.214346653503	7.5	0.0	0.13333333333333333	0.0	14	1	ZNF185	protein_coding	0	false	1.15684489811529	ENSG00000147394	7739	3.0	1	0.0469273292204681	0	false	0	ENSG00000147394	0
48.899606039198	8.0	0.0019634556820003206	0.1250	0.0	15	2	CD320	protein_coding	1	false	-0.577332394315416	ENSG00000167775	51293	2.5	1	0.51235364484375	0	false	0	ENSG00000167775	6615
754.044713901577	2.0	0.0015654218090505956	0.5	0.0	3	2	NONO	protein_coding	1	false	-0.324116972197269	ENSG00000147140	4841	94.5	1	0.163808304008305	0	false	0	ENSG00000147140	5274
40.1256207761451	6.5	0.07697102455877901	0.15384615384615385	0.0	12	2	KRBOX4	protein_coding	1	false	-0.552147495860171	ENSG00000147121	55634	2.0	1	0.450797925808923	0	false	0	ENSG00000147121	259320
976.768799999826	2.0	0.0	0.5	0.0	3	1	TMEM140	protein_coding	0	false	1.33114347825133	ENSG00000146859	55281	188.0	1	0.0304157819625052	0	false	0	ENSG00000146859	0
181.809050150955	10.5	0.05603343365805299	0.09523809523809523	0.0	20	2	CWC25	protein_coding	1	false	0.630672308428683	ENSG00000273559	54883	3.5	1	0.140363927634462	0	false	0	ENSG00000273559	188780
106.499648374841	6.0	0.0035033510830914257	0.16666666666666666	0.0	11	2	TPRA1	protein_coding	1	false	0.188377683522144	ENSG00000163870	131601	2.0	1	0.771021532796465	0	false	0	ENSG00000163870	11803
743.570451564325	6.5	0.0	0.15384615384615385	0.0	12	1	SLC12A9	protein_coding	0	false	1.05751663091019	ENSG00000146828	56996	2.0	1	0.00747166388086855	0	false	0	ENSG00000146828	0
1589.29278525652	2.5	0.0	0.4	0.0	4	1	CREB5	protein_coding	0	false	2.07054441551203	ENSG00000146592	9586	5.0	1	0.00404821844653334	0	false	0	ENSG00000146592	0
368.112393121143	6.5	0.0	0.15384615384615385	0.0	12	1	DYNLT1	protein_coding	0	false	1.0031858040969	ENSG00000146425	6993	7.0	1	0.0442662836292417	0	false	0	ENSG00000146425	0
100.576926643065	8.5	0.13421904032578819	0.11764705882352941	0.0	16	2	NFKBIE	protein_coding	1	false	0.309884566693206	ENSG00000146232	4794	2.0	1	0.659507599071566	0	false	0	ENSG00000146232	452192
189.586934839552	3.0	0.0015835277495800015	0.3333333333333333	0.0	5	2	NFATC2IP	protein_coding	1	false	0.0387878356821547	ENSG00000176953	84901	7.0	1	0.957202812020484	0	false	0	ENSG00000176953	5335
230.273820702018	3.5	0.0	0.2857142857142857	0.0	6	1	DAAM2	protein_coding	0	false	4.12600681608186	ENSG00000146122	23500	2.0	1	0.0191646907561372	0	false	0	ENSG00000146122	0
973.403534814935	10.5	0.0	0.09523809523809523	0.0	20	1	DOK3	protein_coding	0	false	1.43311234209168	ENSG00000146094	79930	6.0	1	0.00253456314250144	0	false	0	ENSG00000146094	0
120.925239160224	5.5	0.03645527239051842	0.18181818181818182	0.0	10	3	SSNA1	protein_coding	2	false	-0.386459663941932	ENSG00000176101	8636	4.333333333333333	1	0.671475283640575	0	false	0	ENSG00000176101	122820
66.7632525739426	6.0	0.004319602500400705	0.16666666666666666	0.0	11	2	TBC1D7	protein_coding	1	false	0.411135941072914	ENSG00000145979		2.0	1	0.627315750060877	0	false	0	ENSG00000145979	14553
13.8374073023402	7.5	0.004986554113016687	0.13333333333333333	0.0	14	2	N4BP3	protein_coding	1	false	0.0455706082334628	ENSG00000145911	23138	3.0	1	0.969338183033909	0	false	0	ENSG00000145911	16800
659.326901922899	2.0	0.0	0.5	0.0	3	1	FBXO38	protein_coding	0	false	1.13197194541038	ENSG00000145868	81545	188.0	1	0.00868562414213698	0	false	0	ENSG00000145868	0
2183.05835253548	2.0	0.0	0.5	0.0	3	1	ARHGAP26	protein_coding	0	false	1.36041745401462	ENSG00000145819	23092	188.0	1	0.00193885957111863	0	false	0	ENSG00000145819	0
331.235756568028	28.0	0.0	0.03571428571428571	0.0	55	1	LHFPL2	protein_coding	0	false	1.12208818701489	ENSG00000145685	10184	5.0	1	0.0219756089987427	0	false	0	ENSG00000145685	0
46.1433638606728	2.0	0.0	0.5	0.0	3	1	MYO10	protein_coding	0	false	2.56099245260494	ENSG00000145555	4651	188.0	1	7.81491941266996E-5	0	false	0	ENSG00000145555	0
70.3544107561062	2.5	0.0	0.4	0.0	4	1	ROPN1L	protein_coding	0	false	2.32078092047223	ENSG00000145491	83853	2.0	1	0.0015221480762781	0	false	0	ENSG00000145491	0
339.212622479862	4.5	0.0	0.2222222222222222	0.0	8	1	CTDSPL	protein_coding	0	false	1.5729167788972	ENSG00000144677	10217	2.0	1	0.0429363897538123	0	false	0	ENSG00000144677	0
136.67596332154	2.5	0.004316931132125875	0.4	0.0	4	3	POM121C	protein_coding	2	false	-0.172867402297429	ENSG00000272391	100101267	3.0	1	0.819847871313249	0	false	0	ENSG00000272391	14544
595.410437363344	2.0	0.001343698242239675	0.5	0.0	3	2	UBR3	protein_coding	1	false	-0.00595794571344906	ENSG00000144357	130507	94.5	1	0.989814360253529	0	false	0	ENSG00000144357	4527
319.7237691857	13.5	0.008126302292033979	0.07407407407407407	0.0	26	2	CUL5	protein_coding	1	false	-0.575768005839516	ENSG00000166266	8065	2.0	1	0.050700314369084	0	false	0	ENSG00000166266	27378
14.6511157122861	14.0	0.0	0.07142857142857142	0.0	27	1	NT5DC4	protein_coding	0	false	2.85982225043389	ENSG00000144130	284958	2.0	1	0.0291372281518451	0	false	0	ENSG00000144130	0
934.650325460937	19.0	0.0	0.05263157894736842	0.0	37	1	RALB	protein_coding	0	false	1.37114191010406	ENSG00000144118	5899	2.0	1	0.0140566742138979	0	false	0	ENSG00000144118	0
32.9332581631255	2.5	0.0062961182050779736	0.4	0.0	4	4	CISD3	protein_coding	3	false	-0.120416209216622	ENSG00000277972	284106	2.0	1	0.937662812409757	0	false	0	ENSG00000277972	21212
81.811744207041	3.0	0.0017794280897342285	0.3333333333333333	0.0	5	2	ETAA1	protein_coding	1	false	-0.5800278206474	ENSG00000143971	54465	2.5	1	0.224931922804974	0	false	0	ENSG00000143971	5995
275.792576469619	2.0	0.0	0.5	0.0	3	1	CNIH4	protein_coding	0	false	1.22478760970353	ENSG00000143771	29097	188.0	1	0.00526831746306265	0	false	0	ENSG00000143771	0
4972.8241687094	2.0	0.0	0.5	0.0	3	1	LYST	protein_coding	0	false	1.01934843288145	ENSG00000143669	1130	188.0	1	0.0409609079531157	0	false	0	ENSG00000143669	0
394.759120853549	6.0	0.0034151959300220236	0.16666666666666666	0.0	11	2	TMEM167B	protein_coding	1	false	0.234476003148488	ENSG00000215717	56900	1.5	1	0.682968579241151	0	false	0	ENSG00000215717	11506
55.9954074401081	6.5	0.0	0.15384615384615385	0.0	12	1	AQP10	protein_coding	0	false	2.64452765365798	ENSG00000143595	89872	2.0	1	0.0065437783879744	0	false	0	ENSG00000143595	0
16012.3527131074	2.0	0.0	0.5	0.0	3	1	S100A8	protein_coding	0	false	2.4705404808521	ENSG00000143546	6279	188.0	1	0.00101827255268794	0	false	0	ENSG00000143546	0
97.1832768026139	4.5	0.018250788053641075	0.2222222222222222	0.0	8	2	PELO	protein_coding	1	false	0.693885117814296	ENSG00000152684	53918	2.0	1	0.209373834861963	0	false	0	ENSG00000152684	61488
116.860437470598	5.0	0.017745899449698135	0.2	0.0	9	2	SMYD2	protein_coding	1	false	-0.304864746742116	ENSG00000143499	56950	2.0	1	0.596567925598905	0	false	0	ENSG00000143499	59787
158.515793825715	15.0	0.008960659649872664	0.06666666666666667	0.0	29	2	CD1D	protein_coding	1	false	0.4409894007488	ENSG00000158473	912	1.5	1	0.605247879516713	0	false	0	ENSG00000158473	30189
596.189512788881	15.5	0.0	0.06451612903225806	0.0	30	1	MINDY1	protein_coding	0	false	1.6009639947231	ENSG00000143409	55793	2.0	1	9.58259008135894E-4	0	false	0	ENSG00000143409	0
8879.28429312928	6.5	0.0	0.15384615384615385	0.0	12	1	MCL1	protein_coding	0	false	1.1702919225682	ENSG00000143384	4170	7.0	1	0.024216618182736	0	false	0	ENSG00000143384	0
127.856084891689	4.5	0.0	0.2222222222222222	0.0	8	1	ADAMTSL4	protein_coding	0	false	1.37882000362743	ENSG00000143382	54507	8.0	1	0.026212344838195	0	false	0	ENSG00000143382	0
846.459931046894	9.0	0.0	0.1111111111111111	0.0	17	1	SNX27	protein_coding	0	false	1.03103578314781	ENSG00000143376	81609	4.0	1	0.0236116712887582	0	false	0	ENSG00000143376	0
40.3025517571872	7.0	0.0	0.14285714285714285	0.0	13	1	TUFT1	protein_coding	0	false	1.79878436467894	ENSG00000143367	7286	8.0	1	0.0331386113397734	0	false	0	ENSG00000143367	0
7.79885744417784	21.0	1.1688747009551625	0.047619047619047616	0.0	41	9	LAT	protein_coding	8	false	-0.580806144898457	ENSG00000213658	27040	1.7777777777777777	1	0.62457760810364	0	false	0	ENSG00000213658	3938009
3637.04014823143	21.5	0.0	0.046511627906976744	0.0	42	1	FCGR2A	protein_coding	0	false	1.51048215613351	ENSG00000143226	2212	9.0	1	0.0261609154954805	0	false	0	ENSG00000143226	0
2108.09999887955	11.5	0.0380373160466124	0.08695652173913043	0.0	22	3	CCL5	protein_coding	2	false	-0.743209095498622	ENSG00000271503	6352	2.0	1	0.141806113306614	0	false	0	ENSG00000271503	128150
8.18082370934992	12.0	0.004949451775866265	0.08333333333333333	0.0	23	2	XCL2	protein_coding	1	false	-1.09937468852538	ENSG00000143185	6846	2.5	1	0.58293315820987	0	false	0	ENSG00000143185	16675
265.375231179529	2.5	0.0012240803072667153	0.4	0.0	4	2	LIMD1	protein_coding	1	false	0.179439246599257	ENSG00000144791	8994	2.5	1	0.780179859980546	0	false	0	ENSG00000144791	4124
55.6700860190038	3.0	0.0	0.3333333333333333	0.0	5	1	MAP3K6	protein_coding	0	false	1.15445868250873	ENSG00000142733	9064	2.0	1	0.049315916710639	0	false	0	ENSG00000142733	0
607.808533910216	2.0	0.0	0.5	0.0	3	1	KIAA0319L	protein_coding	0	false	1.01636669926898	ENSG00000142687	79932	188.0	1	0.0175634715513187	0	false	0	ENSG00000142687	0
1718.59015489027	13.0	0.0	0.07692307692307693	0.0	25	1	PGD	protein_coding	0	false	1.56790044086639	ENSG00000142657	5226	7.0	1	7.72859877339993E-4	0	false	0	ENSG00000142657	0
54.2033995365354	22.0	0.09784272170872588	0.045454545454545456	0.0	43	2	CDC26	protein_coding	1	false	0.247265112454792	ENSG00000176386	246184	2.5	1	0.726657395657693	0	false	0	ENSG00000176386	329638
1140.76567162644	22.5	0.08670549055226086	0.044444444444444446	0.0	44	3	CARM1	protein_coding	2	false	-2.28938555860455	ENSG00000142453	10498	2.0	1	0.0124821519764751	0	false	0	ENSG00000142453	292116
332.509449547966	2.5	0.0012169566585338344	0.4	0.0	4	2	IRAK1	protein_coding	1	false	0.135413059877286	ENSG00000184216	3654	4.5	1	0.861802578783358	0	false	0	ENSG00000184216	4100
734.708481130065	3.0	0.0	0.3333333333333333	0.0	5	1	NLRP12	protein_coding	0	false	1.71764704264432	ENSG00000142405	91662	2.0	1	5.6557304787602E-4	0	false	0	ENSG00000142405	0
776.198328095229	2.0	0.001560079072500935	0.5	0.0	3	2	APP	protein_coding	1	false	0.784840822830941	ENSG00000142192	351	94.5	1	0.145731991334578	0	false	0	ENSG00000142192	5256
148.754038526279	5.0	0.003675802746166586	0.2	0.0	9	2	TMEM50B	protein_coding	1	false	-0.379000360284533	ENSG00000142188	757	3.0	1	0.461209034928866	0	false	0	ENSG00000142188	12384
142.454705242014	4.0	0.0	0.25	0.0	7	1	TRPM2	protein_coding	0	false	1.5332976762892	ENSG00000142185	7226	3.0	1	0.00106636744905193	0	false	0	ENSG00000142185	0
936.779559857164	2.5	0.0	0.4	0.0	4	1	PGGHG	protein_coding	0	false	1.11642556179122	ENSG00000142102	80162	4.0	1	0.0166488293450695	0	false	0	ENSG00000142102	0
1929.59807592442	2.0	0.0	0.5	0.0	3	1	IFITM3	protein_coding	0	false	2.89670863986989	ENSG00000142089	10410	188.0	1	9.11745364056333E-5	0	false	0	ENSG00000142089	0
45.7242957107737	8.0	0.07504763940090113	0.1250	0.0	15	2	SIRT3	protein_coding	1	false	0.437431412148094	ENSG00000142082	23410	4.5	1	0.497795508806811	0	false	0	ENSG00000142082	252840
147.212919750591	4.0	0.0	0.25	0.0	7	1	TMEM91	protein_coding	0	false	1.55143458203618	ENSG00000142046	641649	4.0	1	0.0168091227065484	0	false	0	ENSG00000142046	0
130.280799823686	25.5	0.8852320825393433	0.0392156862745098	0.0	50	2	L3MBTL3	protein_coding	1	false	-0.202207856087214	ENSG00000198945	84456	4.0	1	0.712655055401345	0	false	0	ENSG00000198945	2982400
140.808852914671	5.0	0.006053320510765614	0.2	0.0	9	2	HSD17B12	protein_coding	1	false	0.334341308917197	ENSG00000149084	51144	5.5	1	0.576457525761959	0	false	0	ENSG00000149084	20394
73.9264559776639	5.5	0.0037132019020142113	0.18181818181818182	0.0	10	2	RNF157	protein_coding	1	false	-0.41065221918371	ENSG00000141576	114804	2.0	1	0.740376548481309	0	false	0	ENSG00000141576	12510
189.911543877445	32.5	0.0504924222186604	0.03076923076923077	0.0	64	3	RYK	protein_coding	2	false	-0.453107687233114	ENSG00000163785	6259	2.3333333333333335	1	0.225460557120913	0	false	0	ENSG00000163785	170112
559.076021706146	33.0	0.0	0.030303030303030304	0.0	65	1	SECTM1	protein_coding	0	false	1.38712925915633	ENSG00000141574	6398	3.0	1	0.0123207535003346	0	false	0	ENSG00000141574	0
1342.51862976199	2.0	0.0	0.5	0.0	3	1	SLC16A3	protein_coding	0	false	1.68626300864813	ENSG00000141526	9123	188.0	1	3.62302386399123E-5	0	false	0	ENSG00000141526	0
34.6943260992754	8.5	0.007285118104159617	0.11764705882352941	0.0	16	2	ASGR1	protein_coding	1	false	-0.0543348735652745	ENSG00000141505	432	2.5	1	0.975089323640731	0	false	0	ENSG00000141505	24544
55.99881525062	7.0	0.008577763530480311	0.14285714285714285	0.0	13	3	C18orf21	protein_coding	2	false	0.0659516477815809	ENSG00000141428	83608	2.3333333333333335	1	0.938663869221701	0	false	0	ENSG00000141428	28899
207.655605844917	15.5	0.0	0.06451612903225806	0.0	30	1	IMPA2	protein_coding	0	false	1.41262437474844	ENSG00000141401	3613	3.0	1	0.0201188412417387	0	false	0	ENSG00000141401	0
3870.36552738977	2.0	0.0	0.5	0.0	3	1	SSH2	protein_coding	0	false	1.60259509806405	ENSG00000141298	85464	188.0	1	0.00209564079856263	0	false	0	ENSG00000141298	0
1367.0319291911	9.5	0.013837687663621307	0.10526315789473684	0.0	18	2	RANBP10	protein_coding	1	false	-1.7436841829378	ENSG00000141084	57610	3.0	1	0.0617757018770016	0	false	0	ENSG00000141084	46620
193.14932959614	2.0	0.0	0.5	0.0	3	1	GALNS	protein_coding	0	false	1.11604993344476	ENSG00000141012	2588	10.0	1	0.00143473446508633	0	false	0	ENSG00000141012	0
215.016897979999	4.0	0.353045953470701	0.25	0.0	7	8	ZNF587	protein_coding	7	false	0.1662923984096	ENSG00000198466	84914	2.0	1	0.781722438549499	0	false	0	ENSG00000198466	1189433
580.647336134821	4.5	0.0	0.2222222222222222	0.0	8	1	DEF8	protein_coding	0	false	1.2037128426762	ENSG00000140995	54849	8.0	1	0.0455062614274133	0	false	0	ENSG00000140995	0
118.448574590071	2.0	0.0	0.5	0.0	3	1	KIFC3	protein_coding	0	false	1.92225810371579	ENSG00000140859	3801	11.0	1	4.95354088614978E-4	0	false	0	ENSG00000140859	0
91.0358673881802	5.0	0.04508468237431212	0.2	0.0	9	4	POLR2M	protein_coding	3	false	-0.558015837684401	ENSG00000255529	81488	2.25	1	0.368850402233173	0	false	0	ENSG00000255529	151893
135.331481713725	5.5	0.0	0.18181818181818182	0.0	10	1	CPNE2	protein_coding	0	false	1.14258674774834	ENSG00000140848	221184	4.0	1	0.019994123548802	0	false	0	ENSG00000140848	0
40.222593018045	22.5	0.0	0.044444444444444446	0.0	44	1	TGFB1I1	protein_coding	0	false	2.00548714418477	ENSG00000140682	7041	14.0	1	0.0332802241772438	0	false	0	ENSG00000140682	0
2863.3329980451	2.5	0.0	0.4	0.0	4	1	ITGAX	protein_coding	0	false	1.19801517723862	ENSG00000140678	3687	3.0	1	0.0105219035302604	0	false	0	ENSG00000140678	0
2066.34376755202	2.0	0.0	0.5	0.0	3	1	MCTP2	protein_coding	0	false	1.99494355040755	ENSG00000140563	55784	7.0	1	7.81491941266996E-5	0	false	0	ENSG00000140563	0
314.095081193784	2.0	0.0	0.5	0.0	3	1	PCSK6	protein_coding	0	false	1.71362291480522	ENSG00000140479	5046	188.0	1	0.0378190204274224	0	false	0	ENSG00000140479	0
61.713876660768	11.0	0.009156559990026892	0.09090909090909091	0.0	21	2	LZTFL1	protein_coding	1	false	-0.439558816902617	ENSG00000163818	54585	2.5	1	0.450605879624507	0	false	0	ENSG00000163818	30849
682.718803593142	4.0	0.0	0.25	0.0	7	1	BCL2A1	protein_coding	0	false	1.49582751251768	ENSG00000140379	597	2.0	1	0.048468119603705	0	false	0	ENSG00000140379	0
1388.16714662489	2.0	0.0	0.5	0.0	3	1	TLE3	protein_coding	0	false	1.21310239117599	ENSG00000140332	7090	188.0	1	0.00992447100153527	0	false	0	ENSG00000140332	0
184.753666727652	3.5	0.004316931132125875	0.2857142857142857	0.0	6	2	SLC35E3	protein_coding	1	false	0.999997470607159	ENSG00000175782	55508	2.5	1	0.101608216711238	0	false	0	ENSG00000175782	14544
1391.64150183717	4.0	0.002975310620766623	0.25	0.0	7	2	BNIP2	protein_coding	1	false	0.397892683045325	ENSG00000140299	663	1.5	1	0.369195721554569	0	false	0	ENSG00000140299	10024
2238.6703180495	5.0	0.0	0.2	0.0	9	1	SLC12A6	protein_coding	0	false	1.22380854774272	ENSG00000140199	9990	7.0	1	0.00476445942094896	0	false	0	ENSG00000140199	0
427.769628259155	2.0	0.0	0.5	0.0	3	1	STON2	protein_coding	0	false	1.22859080437938	ENSG00000140022	85439	188.0	1	0.0498174031771445	0	false	0	ENSG00000140022	0
424.466167034525	16.0	0.0758009652544033	0.0625	0.0	31	4	IRAK4	protein_coding	3	false	0.48691131094937	ENSG00000198001	51135	2.0	1	0.137380887018532	0	false	0	ENSG00000198001	255378
642.96163770777	16.5	0.0	0.06060606060606061	0.0	32	1	PELI2	protein_coding	0	false	1.26437599976426	ENSG00000139946	57161	4.0	1	0.00991041972179548	0	false	0	ENSG00000139946	0
63.1652884138935	6.0	0.0	0.16666666666666666	0.0	11	1	REM2	protein_coding	0	false	1.72313732049768	ENSG00000139890	161253	2.0	1	0.0166488293450695	0	false	0	ENSG00000139890	0
320.130938831891	1.5	0.010280018758941663	0.6666666666666666	0.0	2	11	MBNL2	protein_coding	10	false	0.0645333686847449	ENSG00000139793	10150	1.3636363636363635	1	0.944181474608183	0	false	0	ENSG00000139793	34634
249.47908999239	6.0	0.003957186871115385	0.16666666666666666	0.0	11	2	LPAR6	protein_coding	1	false	-0.530934475110465	ENSG00000139679	10161	1.5	1	0.482464481183059	0	false	0	ENSG00000139679	13332
60.8255658251218	3.5	0.0675410945486278	0.2857142857142857	0.0	6	2	RHNO1	protein_coding	1	false	-0.480343332520282	ENSG00000171792	83695	2.0	1	0.39424924519066	0	false	0	ENSG00000171792	227550
7.69735073741515	4.0	0.07675553418460936	0.25	0.0	7	2	HNRNPA1L2	protein_coding	1	false	-0.152920292842775	ENSG00000139675	144983	2.0	1	0.946525871595514	0	false	0	ENSG00000139675	258594
190.819632632317	3.5	0.0	0.2857142857142857	0.0	6	1	CSAD	protein_coding	0	false	1.52785848320171	ENSG00000139631	51380	2.0	1	0.0146125862900365	0	false	0	ENSG00000139631	0
311.449474964335	10.0	0.1342101357648721	0.1	0.0	19	3	DYM	protein_coding	2	false	-0.258174840083732	ENSG00000141627	54808	2.6666666666666665	1	0.431170448706211	0	false	0	ENSG00000141627	452162
25.4256462762886	10.5	0.0	0.09523809523809523	0.0	20	1	GPR84	protein_coding	0	false	2.03284966578518	ENSG00000139572	53831	3.0	1	0.0489475369669169	0	false	0	ENSG00000139572	0
664.385384278387	11.0	0.0	0.09090909090909091	0.0	21	1	SLC15A4	protein_coding	0	false	1.17294357477868	ENSG00000139370	121260	2.0	1	0.042975392481624	0	false	0	ENSG00000139370	0
1278.31372472399	7.0	0.0065326827067490635	0.14285714285714285	0.0	13	2	GLIPR1	protein_coding	1	false	0.294128257589818	ENSG00000139278	11010	1.5	1	0.72474466727246	0	false	0	ENSG00000139278	22009
12.1694441452455	6.5	0.003476340581645919	0.15384615384615385	0.0	12	2	C1R	protein_coding	1	false	0.63981599258483	ENSG00000159403	715	1.5	1	0.603839094065037	0	false	0	ENSG00000159403	11712
400.417818867615	7.0	0.0	0.14285714285714285	0.0	13	1	C1RL	protein_coding	0	false	1.47925132303594	ENSG00000139178	51279	2.0	1	0.00280128410172543	0	false	0	ENSG00000139178	0
813.232368625645	2.0	0.0	0.5	0.0	3	1	FGD4	protein_coding	0	false	1.13897841220407	ENSG00000139132	121512	188.0	1	0.0166488293450695	0	false	0	ENSG00000139132	0
186.826456510888	15.5	0.021183950419404816	0.06451612903225806	0.0	30	2	RNF103	protein_coding	1	false	0.15822607322101	ENSG00000239305	7844	3.5	1	0.801585486970582	0	false	0	ENSG00000239305	71370
64.9965660004346	16.0	0.012937139736306268	0.0625	0.0	31	2	HADH	protein_coding	1	false	-0.632310963107534	ENSG00000138796	3033	1.5	1	0.291738808288356	0	false	0	ENSG00000138796	43586
75.4155798030144	10.0	0.017251399500157312	0.1	0.0	19	3	INTS12	protein_coding	2	false	-0.0745301171247401	ENSG00000138785	57117	1.6666666666666667	1	0.92787517628905	0	false	0	ENSG00000138785	58121
550.734354763401	13.0	0.0	0.07692307692307693	0.0	25	1	ANXA3	protein_coding	0	false	3.00969406597499	ENSG00000138772	306	7.0	1	0.0015221480762781	0	false	0	ENSG00000138772	0
510.075769687323	21.5	0.0	0.046511627906976744	0.0	42	1	CCNG2	protein_coding	0	false	1.17878185682275	ENSG00000138764	901	2.0	1	0.030907127155183	0	false	0	ENSG00000138764	0
551.936481532654	1.5	5.746409977857325E-4	0.6666666666666666	0.0	2	2	H1-5	protein_coding	1	false	-0.0256224247497129	ENSG00000184357	3009	4.0	1	0.987581338761939	0	false	0	ENSG00000184357	1936
692.760337408889	2.0	0.0	0.5	0.0	3	1	MMRN1	protein_coding	0	false	2.51219951704349	ENSG00000138722	22915	2.0	1	0.00542132369651912	0	false	0	ENSG00000138722	0
180.707985169676	16.5	0.0	0.06060606060606061	0.0	32	1	ARHGAP24	protein_coding	0	false	1.23280539625123	ENSG00000138639	83478	2.0	1	0.0102437986804018	0	false	0	ENSG00000138639	0
1440.70596105455	6.5	0.0	0.15384615384615385	0.0	12	1	PARP9	protein_coding	0	false	1.47242073506346	ENSG00000138496	83666	2.0	1	0.0231992220657816	0	false	0	ENSG00000138496	0
892.407025721073	2.0	0.0	0.5	0.0	3	1	ITPRID2	protein_coding	0	false	1.10011842984588	ENSG00000138434	6744	188.0	1	0.00174923357908808	0	false	0	ENSG00000138434	0
399.04826229081	1.5	0.005269719150148706	0.6666666666666666	0.0	2	6	PPIG	protein_coding	5	false	-0.161208915376634	ENSG00000138398	9360	1.3333333333333333	1	0.684560802337157	0	false	0	ENSG00000138398	17754
240.109478744915	3.0	0.26048957275916723	0.3333333333333333	0.0	5	4	ZNF121	protein_coding	3	false	-0.442254617114747	ENSG00000197961	7675	2.5	1	0.252182081451512	0	false	0	ENSG00000197961	877605
640.121475396427	3.0	0.0014573798032685675	0.3333333333333333	0.0	5	2	ANXA7	protein_coding	1	false	0.112500613563213	ENSG00000138279	310	2.0	1	0.89731828697293	0	false	0	ENSG00000138279	4910
127.607941130093	7.5	0.0039850878286525025	0.13333333333333333	0.0	14	2	ANKRD40	protein_coding	1	false	-0.448030047701864	ENSG00000154945	91369	2.5	1	0.442277046560142	0	false	0	ENSG00000154945	13426
1128.74644058505	8.0	0.0	0.1250	0.0	15	1	ENTPD1	protein_coding	0	false	1.74798045610315	ENSG00000138185	953	2.0	1	2.93059392722273E-4	0	false	0	ENSG00000138185	0
563.410599594957	32.5	0.050302458252450236	0.03076923076923077	0.0	64	2	DNAJB14	protein_coding	1	false	0.296072316829054	ENSG00000164031	79982	3.5	1	0.551332701485031	0	false	0	ENSG00000164031	169472
8.24760091499349	33.0	0.03262482710310888	0.030303030303030304	0.0	65	2	KHK	protein_coding	1	false	0.572027953396079	ENSG00000138030	3795	1.5	1	0.740376548481309	0	false	0	ENSG00000138030	109915
114.755772374612	6.0	0.04564477925593489	0.16666666666666666	0.0	11	2	KYAT3	protein_coding	1	false	-0.316596154209394	ENSG00000137944	56267	3.5	1	0.46042581096378	0	false	0	ENSG00000137944	153780
1447.33720813339	2.0	0.0	0.5	0.0	3	1	THBS1	protein_coding	0	false	1.36496447315522	ENSG00000137801	7057	188.0	1	0.035547681760468	0	false	0	ENSG00000137801	0
97.6462906012435	1.5	0.0020967272770446355	0.6666666666666666	0.0	2	3	BUD13	protein_coding	2	false	-0.0860839409836613	ENSG00000137656	84811	3.3333333333333335	1	0.906623436236373	0	false	0	ENSG00000137656	7064
23.0033369424773	3.5	0.0016954283984256734	0.2857142857142857	0.0	6	2	ZNF517	protein_coding	1	false	0.0120907386059592	ENSG00000197363	340385	2.0	1	0.992813914859287	0	false	0	ENSG00000197363	5712
14564.1206376702	4.0	0.0	0.25	0.0	7	1	SORL1	protein_coding	0	false	1.40338062645113	ENSG00000137642	6653	2.0	1	0.0179799264273584	0	false	0	ENSG00000137642	0
3403.2037347814	2.0	0.0	0.5	0.0	3	1	SDCBP	protein_coding	0	false	1.30804785368158	ENSG00000137575	6386	11.0	1	0.034801720246601	0	false	0	ENSG00000137575	0
134.829644037577	5.0	0.006635678794678634	0.2	0.0	9	3	CHML	protein_coding	2	false	-0.434589836915938	ENSG00000203668	1122	3.0	1	0.431170448706211	0	false	0	ENSG00000203668	22356
137.361143149204	5.5	3.947688672804877E-4	0.18181818181818182	0.0	10	2	RAB30	protein_coding	1	false	-0.53527397550406	ENSG00000137502	27314	2.5	1	0.425801362108599	0	false	0	ENSG00000137502	1330
27.4094106764017	2.0	0.0070907018574914065	0.5	0.0	3	5	LGR4	protein_coding	4	false	-0.43875845571937	ENSG00000205213	55366	38.8	1	0.818196506253929	0	false	0	ENSG00000205213	23889
3042.32865380901	2.5	0.0	0.4	0.0	4	1	TLR2	protein_coding	0	false	2.14402187104475	ENSG00000137462	7097	5.0	1	6.57205748815613E-4	0	false	0	ENSG00000137462	0
328.050862115946	2.0	0.0	0.5	0.0	3	1	CPEB2	protein_coding	0	false	1.25197192777403	ENSG00000137449	132864	188.0	1	0.0150899956204015	0	false	0	ENSG00000137449	0
906.875354613155	7.5	0.10343775415100948	0.13333333333333333	0.0	14	3	FAM8A1	protein_coding	2	false	1.32384801838721	ENSG00000137414	51439	3.3333333333333335	1	0.0515742580209644	0	false	0	ENSG00000137414	348488
326.904626338583	21.5	0.011755801321436839	0.046511627906976744	0.0	42	2	SGTB	protein_coding	1	false	0.257559077883312	ENSG00000197860	54557	5.0	1	0.686629128331451	0	false	0	ENSG00000197860	39606
728.691123455071	22.0	0.0	0.045454545454545456	0.0	43	1	RNF144B	protein_coding	0	false	1.52473649161275	ENSG00000137393	255488	2.0	1	0.0185394430837715	0	false	0	ENSG00000137393	0
928.789655409291	3.5	0.0	0.2857142857142857	0.0	6	1	FLOT1	protein_coding	0	false	1.56915360089435	ENSG00000137312	10211	13.0	1	0.00138568612066198	0	false	0	ENSG00000137312	0
976.376334768639	5.0	0.01488753539562964	0.2	0.0	9	2	PTTG1IP	protein_coding	1	false	0.635569057591896	ENSG00000183255	754	4.0	1	0.0259079865309842	0	false	0	ENSG00000183255	50157
135.326117682161	5.5	0.013751610241432328	0.18181818181818182	0.0	10	2	SLC22A23	protein_coding	1	false	-0.904005652645982	ENSG00000137266	63027	2.0	1	0.38815697553602	0	false	0	ENSG00000137266	46330
134.244707126317	4.5	0.021309207909624643	0.2222222222222222	0.0	8	5	TMEM14B	protein_coding	4	false	-0.897902065518114	ENSG00000137210	81853	6.0	1	0.0747683999033851	0	false	0	ENSG00000137210	71792
612.633817567108	2.0	0.0	0.5	0.0	3	1	KIF13A	protein_coding	0	false	1.09586284813583	ENSG00000137177	63971	188.0	1	0.0157389215132769	0	false	0	ENSG00000137177	0
53.0094459488176	7.5	0.07963111372311564	0.13333333333333333	0.0	14	2	GRAMD1C	protein_coding	1	false	1.05788229397645	ENSG00000178075	54762	2.0	1	0.426032502876253	0	false	0	ENSG00000178075	268282
55.7959123602619	8.0	0.08115171590888853	0.1250	0.0	15	2	CD72	protein_coding	1	false	0.309346855086876	ENSG00000137101	971	2.0	1	0.772879520162153	0	false	0	ENSG00000137101	273405
10726.7807633905	2.0	0.0	0.5	0.0	3	1	TLN1	protein_coding	0	false	1.22626158031491	ENSG00000137076	7094	188.0	1	0.00390384422957816	0	false	0	ENSG00000137076	0
112.587602330077	5.0	0.004025751990169364	0.2	0.0	9	2	PDCL	protein_coding	1	false	-0.350285459310432	ENSG00000136940	5082	5.0	1	0.521488887507927	0	false	0	ENSG00000136940	13563
229.31917557109	2.5	0.0017405448404005865	0.4	0.0	4	2	USP20	protein_coding	1	false	-0.19199914977862	ENSG00000136878	10868	4.0	1	0.677121074084287	0	false	0	ENSG00000136878	5864
3342.90110915303	22.5	0.0	0.044444444444444446	0.0	44	1	TLR4	protein_coding	0	false	1.79893802778211	ENSG00000136869	7099	14.0	1	0.0044720171260163	0	false	0	ENSG00000136869	0
193.482672005735	5.0	0.010461078164235721	0.2	0.0	9	2	TMEM41B	protein_coding	1	false	-0.294743171344461	ENSG00000166471	440026	2.0	1	0.517678570212059	0	false	0	ENSG00000166471	35244
17.0251165975877	5.5	0.008863006298492754	0.18181818181818182	0.0	10	2	SLC2A8	protein_coding	1	false	-0.51432553054529	ENSG00000136856	29988	2.0	1	0.691150218247892	0	false	0	ENSG00000136856	29860
4297.21168427944	7.0	0.08130160935097623	0.14285714285714285	0.0	13	2	C9orf78	protein_coding	1	false	-0.917420859409887	ENSG00000136819	51759	3.5	1	0.583482543832555	0	false	0	ENSG00000136819	273910
180.634569170779	16.0	0.0	0.0625	0.0	31	1	TOR1B	protein_coding	0	false	1.04362198487888	ENSG00000136816	27348	7.0	1	0.0306256385144939	0	false	0	ENSG00000136816	0
186.038194667262	15.5	0.017114566080746556	0.06451612903225806	0.0	30	2	SULT1A1	protein_coding	1	false	1.00970499638614	ENSG00000196502	6817	2.5	1	0.236665763221503	0	false	0	ENSG00000196502	57660
115.066827612584	4.5	0.006995423055689123	0.2222222222222222	0.0	8	2	CCDC115	protein_coding	1	false	-0.565680760153454	ENSG00000136710	84317	12.0	1	0.333301059736483	0	false	0	ENSG00000136710	23568
552.451891929621	1.5	0.011508254527969225	0.6666666666666666	0.0	2	12	WDR33	protein_coding	11	false	-0.350459897544236	ENSG00000136709	55339	1.3333333333333333	1	0.229415816136721	0	false	0	ENSG00000136709	38772
457.735802167703	6.0	0.0	0.16666666666666666	0.0	11	1	IL1RN	protein_coding	0	false	1.83209997987147	ENSG00000136689	3557	2.0	1	0.0174095366746237	0	false	0	ENSG00000136689	0
145.793585007452	6.0	0.0	0.16666666666666666	0.0	11	1	HLX	protein_coding	0	false	1.72190672648037	ENSG00000136630	3142	5.0	1	0.00301180189143251	0	false	0	ENSG00000136630	0
446.833911466099	2.0	0.0015725454577834766	0.5	0.0	3	2	SRSF1	protein_coding	1	false	0.290867151034639	ENSG00000136450	6426	3.5	1	0.425628524786733	0	false	0	ENSG00000136450	5298
263.35833610028	29.0	0.023990668020159926	0.034482758620689655	0.0	57	2	TTYH3	protein_coding	1	false	0.229248667139158	ENSG00000136295	80727	2.5	1	0.786535003949732	0	false	0	ENSG00000136295	80826
352.900706502777	15.0	0.5798261236071782	0.06666666666666667	0.0	29	2	VPS36	protein_coding	1	false	-0.410830333254648	ENSG00000136100	51028	3.0	1	0.107592910181653	0	false	0	ENSG00000136100	1953469
171.72114504966	5.0	0.0	0.2	0.0	9	1	DRAM1	protein_coding	0	false	1.45933215794614	ENSG00000136048	55332	3.0	1	0.00193885957111863	0	false	0	ENSG00000136048	0
4238.71245563856	6.5	0.0	0.15384615384615385	0.0	12	1	PLXNC1	protein_coding	0	false	1.73807361448623	ENSG00000136040	10154	2.0	1	0.00272641560510139	0	false	0	ENSG00000136040	0
557.288536584591	2.0	0.0	0.5	0.0	3	1	CKAP4	protein_coding	0	false	1.32151697947918	ENSG00000136026	10970	188.0	1	0.0126280385816032	0	false	0	ENSG00000136026	0
41.8103039099406	5.5	0.11829115539646072	0.18181818181818182	0.0	10	2	ZNF624	protein_coding	1	false	-0.299003029424067	ENSG00000197566	57547	2.5	1	0.65647353385499	0	false	0	ENSG00000197566	398530
4057.16198045152	2.0	0.0	0.5	0.0	3	1	NIBAN1	protein_coding	0	false	1.46861708166797	ENSG00000135842	116496	188.0	1	0.0270568382728361	0	false	0	ENSG00000135842	0
32.6390583066818	9.0	0.004606922999293571	0.1111111111111111	0.0	17	2	SNUPN	protein_coding	1	false	-0.247864785729794	ENSG00000169371	10073	3.0	1	0.801506382210777	0	false	0	ENSG00000169371	15521
261.321249341817	9.5	0.0	0.10526315789473684	0.0	18	1	EGLN1	protein_coding	0	false	1.0829016149644	ENSG00000135766	54583	2.0	1	0.0468123701607041	0	false	0	ENSG00000135766	0
578.979471531264	2.0	0.05366956955352531	0.5	0.0	3	2	ZCCHC7	protein_coding	1	false	-1.42633794497624	ENSG00000147905	84186	9.5	1	0.00307857389895525	0	false	0	ENSG00000147905	180816
53.8189053079234	2.5	0.07047781873875798	0.4	0.0	4	2	MPHOSPH6	protein_coding	1	false	-0.298415752519575	ENSG00000135698	10200	2.0	1	0.681047516829069	0	false	0	ENSG00000135698	237444
3909.53688172958	10.5	0.0	0.09523809523809523	0.0	20	1	DYSF	protein_coding	0	false	2.51187443462956	ENSG00000135636	8291	6.0	1	5.37974375468489E-8	0	false	0	ENSG00000135636	0
708.588424904452	4.0	0.0	0.25	0.0	7	1	MICAL1	protein_coding	0	false	1.19180393242706	ENSG00000135596	64780	13.0	1	3.03443039718347E-4	0	false	0	ENSG00000135596	0
180.019094825292	16.0	0.5988165838542501	0.0625	0.0	31	3	VPS16	protein_coding	2	false	0.420904685157266	ENSG00000215305	64601	1.6666666666666667	1	0.274734390200343	0	false	0	ENSG00000215305	2017449
186.83330640024	16.5	0.0	0.06060606060606061	0.0	32	1	ACVR1B	protein_coding	0	false	1.28613813169001	ENSG00000135503	91	3.0	1	0.0222251937508088	0	false	0	ENSG00000135503	0
177.874648367387	2.0	0.014280244341151537	0.5	0.0	3	3	RXRB	protein_coding	2	false	0.317664903342912	ENSG00000204231	6257	6.666666666666667	1	0.414990602483597	0	false	0	ENSG00000204231	48111
134.001908305995	2.5	0.0020243035149270124	0.4	0.0	4	2	TFCP2	protein_coding	1	false	-0.026351333329452	ENSG00000135457	7024	2.0	1	0.955231501852142	0	false	0	ENSG00000135457	6820
70.9841941642571	5.0	0.003170914142223647	0.2	0.0	9	2	TSPAN31	protein_coding	1	false	0.02760572563891	ENSG00000135452	6302	4.5	1	0.956071851011066	0	false	0	ENSG00000135452	10683
34.4940838948729	7.0	0.0	0.14285714285714285	0.0	13	1	ITGA7	protein_coding	0	false	3.77540084989191	ENSG00000135424	3679	5.0	1	7.81491941266996E-5	0	false	0	ENSG00000135424	0
120.729252559764	24.0	0.0	0.041666666666666664	0.0	47	1	AVIL	protein_coding	0	false	2.0214993947602	ENSG00000135407	10677	3.0	1	0.00877377549318293	0	false	0	ENSG00000135407	0
1679.32721817299	21.5	1.0394721376288936	0.046511627906976744	0.0	42	3	ZDHHC20	protein_coding	2	false	-0.340851820853973	ENSG00000180776	253832	4.333333333333333	1	0.516614058793078	0	false	0	ENSG00000180776	3502044
749.095479783003	22.0	0.0	0.045454545454545456	0.0	43	1	CD63	protein_coding	0	false	1.41201087718872	ENSG00000135404	967	3.0	1	0.00247873270264713	0	false	0	ENSG00000135404	0
16.9112960133783	6.5	0.00906484301259105	0.15384615384615385	0.0	12	3	MAGI2	protein_coding	2	false	-0.239756152929227	ENSG00000187391	9863	1.3333333333333333	1	0.920087026483297	0	false	0	ENSG00000187391	30540
288.382978810367	7.0	0.0	0.14285714285714285	0.0	13	1	PRRG4	protein_coding	0	false	1.92042921082542	ENSG00000135378	79056	3.0	1	0.00505857548472986	0	false	0	ENSG00000135378	0
970.695570230268	7.0	0.0	0.14285714285714285	0.0	13	1	PHF21A	protein_coding	0	false	1.04381510443682	ENSG00000135365	51317	8.0	1	0.00369782738988051	0	false	0	ENSG00000135365	0
485.468822064447	12.0	0.0	0.08333333333333333	0.0	23	1	TRAFD1	protein_coding	0	false	1.08593497921733	ENSG00000135148	10906	3.0	1	0.013507210294156	0	false	0	ENSG00000135148	0
15.2813938469765	3.5	0.0017720076223041441	0.2857142857142857	0.0	6	2	HRK	protein_coding	1	false	0.307051995108663	ENSG00000135116	8739	2.0	1	0.889917932988251	0	false	0	ENSG00000135116	5970
200.020884913624	3.5	0.30599098858435286	0.2857142857142857	0.0	6	3	ZKSCAN8	protein_coding	2	false	-0.293661937095976	ENSG00000198315	7745	4.333333333333333	1	0.701604949352583	0	false	0	ENSG00000198315	1030902
435.777536195563	4.0	0.0	0.25	0.0	7	1	OASL	protein_coding	0	false	2.43775349097618	ENSG00000135114	8638	3.0	1	0.00503648904646032	0	false	0	ENSG00000135114	0
48.0505540217399	5.0	0.007348934124058342	0.2	0.0	9	2	USP30	protein_coding	1	false	0.213428698281712	ENSG00000135093	84749	2.5	1	0.74760477141866	0	false	0	ENSG00000135093	24759
36.9180406386085	15.5	0.10949048102438068	0.06451612903225806	0.0	30	7	NCR3	protein_coding	6	false	-0.610308961517649	ENSG00000204475	259197	1.7142857142857142	1	0.592411799589311	0	false	0	ENSG00000204475	368880
965.718884031981	16.0	0.0	0.0625	0.0	31	1	ADAM19	protein_coding	0	false	1.27835322056761	ENSG00000135074	8728	7.0	1	0.00380431991499178	0	false	0	ENSG00000135074	0
31.1218213752652	5.0	0.004840519313992627	0.2	0.0	9	2	MEMO1	protein_coding	1	false	0.489019920391189	ENSG00000162959	51072	4.0	1	0.662435202938119	0	false	0	ENSG00000162959	16308
74.4589810326209	5.5	0.002742604762159178	0.18181818181818182	0.0	10	2	RFK	protein_coding	1	false	-0.358706672591468	ENSG00000135002	55312	1.5	1	0.725391423295963	0	false	0	ENSG00000135002	9240
766.883654949524	5.0	0.0016856333814179623	0.2	0.0	9	2	OSTF1	protein_coding	1	false	0.709469005067263	ENSG00000134996	26578	4.0	1	0.151122934813754	0	false	0	ENSG00000134996	5679
11.0857416075097	7.0	0.04788190177675672	0.14285714285714285	0.0	13	4	ANKRD39	protein_coding	3	false	-0.69107976178757	ENSG00000213337	51239	2.25	1	0.643044243099749	0	false	0	ENSG00000213337	161317
669.536466900578	7.5	0.004674894480953144	0.13333333333333333	0.0	14	2	TPP2	protein_coding	1	false	-0.355556567994231	ENSG00000134900	7174	2.5	1	0.330110634317261	0	false	0	ENSG00000134900	15750
44.7452410281774	19.5	0.46671831311998	0.05128205128205128	0.0	38	3	GTF2H5	protein_coding	2	false	-0.330634978934514	ENSG00000272047	404672	3.6666666666666665	1	0.699255958030952	0	false	0	ENSG00000272047	1572402
63.9359360970908	20.0	0.23252568965824294	0.05	0.0	39	2	ERCC5	protein_coding	1	false	-0.158251910608745	ENSG00000134899	2073	2.5	1	0.857527685176047	0	false	0	ENSG00000134899	783393
34.802283971707	5.5	0.005586127881367503	0.18181818181818182	0.0	10	2	ABHD6	protein_coding	1	false	0.429579676326076	ENSG00000163686	57406	2.0	1	0.6485283706916	0	false	0	ENSG00000163686	18820
391.165219562574	6.0	0.0032682706749063537	0.16666666666666666	0.0	11	2	C5AR2	protein_coding	1	false	1.34156696788815	ENSG00000134830	27202	2.0	1	0.0258102908473927	0	false	0	ENSG00000134830	11011
119.661133132761	9.5	0.05982262114655126	0.10526315789473684	0.0	18	2	TMEM258	protein_coding	1	false	0.126087739264091	ENSG00000134825	746	2.5	1	0.883350952569932	0	false	0	ENSG00000134825	201546
537.046545143116	7.0	0.0	0.14285714285714285	0.0	13	1	DHX34	protein_coding	0	false	1.27904962843945	ENSG00000134815	9704	2.0	1	0.00993730815447354	0	false	0	ENSG00000134815	0
181.242753615889	5.5	0.0699423578090031	0.18181818181818182	0.0	10	2	MBOAT1	protein_coding	1	false	0.392481137769496	ENSG00000172197	154141	3.5	1	0.557411707656046	0	false	0	ENSG00000172197	235640
69.5043678997942	6.0	0.07407318361798246	0.16666666666666666	0.0	11	2	SLC43A3	protein_coding	1	false	-0.0912153938340423	ENSG00000134802	29015	2.0	1	0.925195930330159	0	false	0	ENSG00000134802	249557
294.82585629635	5.0	0.0	0.2	0.0	9	1	DSC2	protein_coding	0	false	1.98356464927017	ENSG00000134755	1824	7.0	1	0.0199089240218491	0	false	0	ENSG00000134755	0
1528.8446631079	2.5	0.0	0.4	0.0	4	1	AGO4	protein_coding	0	false	1.16477229285573	ENSG00000134698	192670	2.0	1	0.0185685139278219	0	false	0	ENSG00000134698	0
141.958862586437	2.5	0.004524704220168237	0.4	0.0	4	2	NOP9	protein_coding	1	false	-0.111974357065985	ENSG00000196943	161424	3.0	1	0.829144784217776	0	false	0	ENSG00000196943	15244
30.7264894432186	3.0	0.0043617507554035845	0.3333333333333333	0.0	5	3	CDCA8	protein_coding	2	false	0.298464239989524	ENSG00000134690	55143	1.3333333333333333	1	0.837049154272499	0	false	0	ENSG00000134690	14695
1717.09556664667	4.0	0.0	0.25	0.0	7	1	PHC2	protein_coding	0	false	2.05718699630791	ENSG00000134686	1912	13.0	1	0.00165343107357951	0	false	0	ENSG00000134686	0
1381.01412015006	5.0	0.005545760538547844	0.2	0.0	9	2	ANPEP	protein_coding	1	false	1.61157211886615	ENSG00000166825	290	2.0	1	0.00375682096525693	0	false	0	ENSG00000166825	18684
224.244623667578	5.5	0.003582601675244727	0.18181818181818182	0.0	10	2	YARS1	protein_coding	1	false	-0.320445702308384	ENSG00000134684	8565	1.5	1	0.383033124218391	0	false	0	ENSG00000134684	12070
736.993390659103	2.0	7.720254314259763E-4	0.5	0.0	3	2	PPP1CC	protein_coding	1	false	-0.220029329684728	ENSG00000186298	5501	94.5	1	0.604749887937324	0	false	0	ENSG00000186298	2601
63.6440671617794	2.5	0.0	0.4	0.0	4	1	SPOCD1	protein_coding	0	false	1.68033235119388	ENSG00000134668	90853	2.0	1	0.0227889123575029	0	false	0	ENSG00000134668	0
26.0672387883219	10.5	0.7022492920874072	0.09523809523809523	0.0	20	4	TDRKH	protein_coding	3	false	-0.132868119806575	ENSG00000182134	11022	2.25	1	0.900861257973805	0	false	0	ENSG00000182134	2365920
47.4753755592738	11.0	0.0	0.09090909090909091	0.0	21	1	PIWIL4	protein_coding	0	false	1.31846942869165	ENSG00000134627	143689	4.0	1	0.0442662836292417	0	false	0	ENSG00000134627	0
683.467819864445	6.5	0.006083596017880358	0.15384615384615385	0.0	12	3	TTN	protein_coding	2	false	-0.313343223719295	ENSG00000155657	7273	2.0	1	0.824464304838561	0	false	0	ENSG00000155657	20496
85.2582304291698	7.0	0.0	0.14285714285714285	0.0	13	1	MYBPC3	protein_coding	0	false	2.31590987218399	ENSG00000134571	4607	3.0	1	8.92884251793526E-5	0	false	0	ENSG00000134571	0
154.191783201364	3.0	0.001277804491460526	0.3333333333333333	0.0	5	2	UQCRFS1	protein_coding	1	false	-0.284898542217294	ENSG00000169021	7386	2.5	1	0.6601895275185	0	false	0	ENSG00000169021	4305
88.8799576382872	3.5	0.0	0.2857142857142857	0.0	6	1	ECHDC3	protein_coding	0	false	3.24598231935153	ENSG00000134463	79746	2.0	1	0.00470537528242236	0	false	0	ENSG00000134463	0
1437.39932501503	15.0	0.0	0.06666666666666667	0.0	29	1	RSAD2	protein_coding	0	false	2.90279081991981	ENSG00000134321	91543	2.0	1	0.0421908494555942	0	false	0	ENSG00000134321	0
622.657958204332	2.0	0.001250200352620612	0.5	0.0	3	2	YWHAQ	protein_coding	1	false	-0.351822451551853	ENSG00000134308	10971	94.5	1	0.452229320172184	0	false	0	ENSG00000134308	4212
33.8943190637528	11.0	0.0013775355737208597	0.09090909090909091	0.0	21	2	AP4M1	protein_coding	1	false	0.736641594753272	ENSG00000221838	9179	2.5	1	0.435408518304801	0	false	0	ENSG00000221838	4641
675.684632532696	2.0	0.0	0.5	0.0	3	1	SORT1	protein_coding	0	false	1.26723584643929	ENSG00000134243	6272	188.0	1	0.00587688607574332	0	false	0	ENSG00000134243	0
346.593318795334	20.5	1.176280624269084	0.04878048780487805	0.0	40	3	CD3E	protein_coding	2	false	-1.42634255559271	ENSG00000198851	916	5.333333333333333	1	0.0165458957360767	0	false	0	ENSG00000198851	3962960
526.145092453218	21.0	0.013800288507773682	0.047619047619047616	0.0	41	2	PTPN22	protein_coding	1	false	0.0759775390993306	ENSG00000134242	26191	2.0	1	0.903143319814969	0	false	0	ENSG00000134242	46494
27.6936974827312	2.0	0.27370216024647825	0.5	0.0	3	2	CDKN2AIPNL	protein_coding	1	false	-0.873131043006549	ENSG00000237190	91368	6.0	1	0.397745639095036	0	false	0	ENSG00000237190	922119
17.057853670304	2.5	0.3639234682671131	0.4	0.0	4	2	PSRC1	protein_coding	1	false	0.80889356666451	ENSG00000134222	84722	2.0	1	0.527978295447124	0	false	0	ENSG00000134222	1226080
869.672139830469	17.0	1.328106356075582	0.058823529411764705	0.0	33	2	RHOG	protein_coding	1	false	1.07365288213406	ENSG00000177105	391	2.5	1	0.0345132939880317	0	false	0	ENSG00000177105	4474470
532.263715596853	17.5	1.359763851044505	0.05714285714285714	0.0	34	3	VAV3	protein_coding	2	false	0.742353530645573	ENSG00000134215	10451	3.3333333333333335	1	0.0294365656693333	0	false	0	ENSG00000134215	4581126
91.6774909567376	10.0	0.010004571007936931	0.1	0.0	19	2	THUMPD3	protein_coding	1	false	-0.640997895858632	ENSG00000134077	25917	2.0	1	0.185127211302157	0	false	0	ENSG00000134077	33706
71.0154245087039	15.5	0.10002493277056508	0.06451612903225806	0.0	30	4	TIRAP	protein_coding	3	false	0.695100642034789	ENSG00000150455	114609	2.5	1	0.0885285254488335	0	false	0	ENSG00000150455	336990
86.6467619786654	16.0	0.0	0.0625	0.0	31	1	IRAK2	protein_coding	0	false	1.23489658277325	ENSG00000134070	3656	4.0	1	0.0381464811315356	0	false	0	ENSG00000134070	0
1452.90256312462	2.0	0.0	0.5	0.0	3	1	NUMB	protein_coding	0	false	1.39588469787538	ENSG00000133961	8650	11.0	1	0.00253646531934933	0	false	0	ENSG00000133961	0
29.332433755564	17.0	0.605175330804438	0.058823529411764705	0.0	33	3	NDUFAF8	protein_coding	2	false	-0.365953207518498	ENSG00000224877	284184	2.3333333333333335	1	0.767973380538243	0	false	0	ENSG00000224877	2038872
601.787462286646	17.5	0.0	0.05714285714285714	0.0	34	1	DGLUCY	protein_coding	0	false	1.13175879772477	ENSG00000133943	80017	3.0	1	0.0471402085601523	0	false	0	ENSG00000133943	0
42.9387437390643	13.5	0.04517699298914237	0.07407407407407407	0.0	26	5	PAPSS2	protein_coding	4	false	0.756813623641069	ENSG00000198682	9060	2.2	1	0.304086662406807	0	false	0	ENSG00000198682	152204
414.750770225689	5.5	0.09906620837859818	0.18181818181818182	0.0	10	2	HSD17B4	protein_coding	1	false	0.327185921293256	ENSG00000133835	3295	2.5	1	0.596787835571044	0	false	0	ENSG00000133835	333760
607.442013226722	2.0	0.0	0.5	0.0	3	1	SBF2	protein_coding	0	false	1.34781401269358	ENSG00000133812	81846	188.0	1	0.00214192471626862	0	false	0	ENSG00000133812	0
19.4536966141567	4.5	0.008439149198886336	0.2222222222222222	0.0	8	3	LIN37	protein_coding	2	false	0.467956125278559	ENSG00000267796	55957	2.3333333333333335	1	0.632540306502596	0	false	0	ENSG00000267796	28432
579.336356830252	1.0	5.10824977887007E-4	1.0	0.0	1	2	KRAS	protein_coding	1	false	0.713113250984966	ENSG00000133703	3845	14.0	1	0.0367699093482261	0	false	0	ENSG00000133703	1721
1466.67122423562	5.5	0.0	0.18181818181818182	0.0	10	1	RTN3	protein_coding	0	false	1.22445624950476	ENSG00000133318	10313	5.0	1	0.0124857579679802	0	false	0	ENSG00000133318	0
9.78410557805882	9.5	0.004471870492066036	0.10526315789473684	0.0	18	2	SLC29A2	protein_coding	1	false	-0.230292973876716	ENSG00000174669	3177	2.5	1	0.884798851685778	0	false	0	ENSG00000174669	15066
1095.19948181323	10.0	0.0	0.1	0.0	19	1	ALOX5AP	protein_coding	0	false	2.19563234751585	ENSG00000132965	241	2.0	1	0.00229331768245474	0	false	0	ENSG00000132965	0
270.332871674321	7.5	0.0	0.13333333333333333	0.0	14	1	PPP1R3D	protein_coding	0	false	1.44403311630196	ENSG00000132825	5509	2.0	1	0.0063433306541668	0	false	0	ENSG00000132825	0
85.8075823637587	2.5	0.013946916944192148	0.4	0.0	4	2	IGHMBP2	protein_coding	1	false	0.130912791008734	ENSG00000132740	3508	3.0	1	0.861445399193931	0	false	0	ENSG00000132740	46988
693.640398812144	9.5	0.029668216060266067	0.10526315789473684	0.0	18	2	PDE7A	protein_coding	1	false	0.0914854746191903	ENSG00000205268	5150	2.0	1	0.894576183045656	0	false	0	ENSG00000205268	99954
595.72195314224	2.0	0.0	0.5	0.0	3	1	ARHGEF11	protein_coding	0	false	1.35472157701732	ENSG00000132694	9826	188.0	1	0.00211844843273977	0	false	0	ENSG00000132694	0
91.8235243537168	23.0	0.04234118715606133	0.043478260869565216	0.0	45	2	JPT2	protein_coding	1	false	-0.0261607080429084	ENSG00000206053	90861	3.0	1	0.980553947564036	0	false	0	ENSG00000206053	142650
56.5182545236536	23.5	0.031935910906899845	0.0425531914893617	0.0	46	3	FIGNL1	protein_coding	2	false	0.0776852772861408	ENSG00000132436	63979	1.3333333333333333	1	0.940928813109521	0	false	0	ENSG00000132436	107594
53.2689571668769	10.0	0.009925617234480833	0.1	0.0	19	2	COQ4	protein_coding	1	false	-0.395419168615382	ENSG00000167113	51117	2.5	1	0.604749887937324	0	false	0	ENSG00000167113	33440
237.53654834237	6.0	0.0	0.16666666666666666	0.0	11	1	CARD6	protein_coding	0	false	1.23486146044635	ENSG00000132357	84674	3.0	1	0.00703488925321719	0	false	0	ENSG00000132357	0
237.458002878566	7.0	0.003191097813633476	0.14285714285714285	0.0	13	2	EIF4E	protein_coding	1	false	0.24458454231206	ENSG00000151247	1977	2.0	1	0.597395021831452	0	false	0	ENSG00000151247	10751
2445.6017504177	7.5	0.0	0.13333333333333333	0.0	14	1	TRIM22	protein_coding	0	false	1.45182105535735	ENSG00000132274	10346	2.0	1	0.0140069456925256	0	false	0	ENSG00000132274	0
27.4637359190141	4.5	0.01437552314295382	0.2222222222222222	0.0	8	5	ZBTB9	protein_coding	4	false	0.00237638893100497	ENSG00000213588	221504	1.8	1	0.9986373962671	0	false	0	ENSG00000213588	48432
24.5074716727778	5.0	0.0	0.2	0.0	9	1	PPARG	protein_coding	0	false	3.64137905006704	ENSG00000132170	5468	5.0	1	0.0176405039509603	0	false	0	ENSG00000132170	0
219.764847444187	2.5	0.258006684357061	0.4	0.0	4	4	PURA	protein_coding	3	false	-0.117021007490073	ENSG00000185129	5813	2.25	1	0.847452055774353	0	false	0	ENSG00000185129	869240
1507.78522333143	3.0	0.0	0.3333333333333333	0.0	5	1	RAF1	protein_coding	0	false	1.12418962255532	ENSG00000132155	5894	4.0	1	0.0174095366746237	0	false	0	ENSG00000132155	0
346.069528690632	2.0	0.0	0.5	0.0	3	1	TRIM21	protein_coding	0	false	1.30964425861071	ENSG00000132109	6737	188.0	1	0.0258895928596094	0	false	0	ENSG00000132109	0
592.279199758459	2.0	0.0	0.5	0.0	3	1	CHSY1	protein_coding	0	false	1.13708938903162	ENSG00000131873	22856	188.0	1	0.00962585802457442	0	false	0	ENSG00000131873	0
317.648029889491	5.0	0.07846075760004274	0.2	0.0	9	2	SCYL1	protein_coding	1	false	0.386208973972982	ENSG00000142186	57410	3.0	1	0.494249985557829	0	false	0	ENSG00000142186	264339
15.316058594426	5.5	0.0847476744255074	0.18181818181818182	0.0	10	2	CHD1L	protein_coding	1	false	-0.468693923389827	ENSG00000131778	9557	2.0	1	0.754133507054373	0	false	0	ENSG00000131778	285520
759.13879594921	2.0	0.0	0.5	0.0	3	1	RARA	protein_coding	0	false	1.13571564382164	ENSG00000131759	5914	11.0	1	0.014705740056705	0	false	0	ENSG00000131759	0
635.150025322961	6.5	0.0050684760734448185	0.15384615384615385	0.0	12	2	NINJ1	protein_coding	1	false	1.03372083243592	ENSG00000131669	4814	2.5	1	0.13714490552366	0	false	0	ENSG00000131669	17076
7.74387971940204	6.0	0.12745602631000932	0.16666666666666666	0.0	11	3	EDAR	protein_coding	2	false	-1.71975929149617	ENSG00000135960	10913	3.0	1	0.318126571840898	0	false	0	ENSG00000135960	429407
2244.44811943917	5.0	0.0	0.2	0.0	9	1	SLC6A6	protein_coding	0	false	1.3553401884204	ENSG00000131389	6533	7.0	1	0.00588571655686193	0	false	0	ENSG00000131389	0
7.44713740802162	5.5	0.0055000504591785244	0.18181818181818182	0.0	10	2	SHPK	protein_coding	1	false	1.03808257982242	ENSG00000197417	23729	2.5	1	0.629099758483021	0	false	0	ENSG00000197417	18530
846.496174722714	2.5	0.0	0.4	0.0	4	1	LILRB2	protein_coding	0	false	1.08841891039805	ENSG00000131042	10288	8.0	1	0.0289166098684431	0	false	0	ENSG00000131042	0
8.36609208853058	4.5	0.004920066724843131	0.2222222222222222	0.0	8	2	NOTCH2NLA	protein_coding	1	false	0.463084938674424	ENSG00000264343	388677	5.0	1	0.863739983393506	0	false	0	ENSG00000264343	16576
1582.65354938382	5.0	0.003368595394561094	0.2	0.0	9	2	THEMIS2	protein_coding	1	false	0.704928967825868	ENSG00000130775	9473	1.5	1	0.0296002375792888	0	false	0	ENSG00000130775	11349
414.965063280283	24.5	0.011526063649801428	0.04081632653061224	0.0	48	2	ATG13	protein_coding	1	false	0.155925685425366	ENSG00000175224	9776	2.0	1	0.740308004340308	0	false	0	ENSG00000175224	38832
116.222604460058	25.0	0.0	0.04	0.0	49	1	SESN2	protein_coding	0	false	1.40019153684004	ENSG00000130766	83667	2.0	1	0.0367263723034377	0	false	0	ENSG00000130766	0
1256.74528056201	2.0	0.0	0.5	0.0	3	1	HELZ2	protein_coding	0	false	1.56318494651142	ENSG00000130589	85441	188.0	1	0.018975489571227	0	false	0	ENSG00000130589	0
279.168000381599	14.5	0.007147394228657251	0.06896551724137931	0.0	28	2	UBAC1	protein_coding	1	false	-0.289289722914161	ENSG00000130560	10422	2.5	1	0.736577976826943	0	false	0	ENSG00000130560	24080
330.105053269954	3.5	0.0	0.2857142857142857	0.0	6	1	ARPC1B	protein_coding	0	false	1.02616213156532	ENSG00000130429	10095	13.0	1	0.0274132774071169	0	false	0	ENSG00000130429	0
238.293619212489	4.5	0.04460353926614545	0.2222222222222222	0.0	8	6	RAB4A	protein_coding	5	false	-0.1677911866379	ENSG00000168118	5867	5.333333333333333	1	0.853896037082874	0	false	0	ENSG00000168118	150272
73.7140490648231	5.0	0.0	0.2	0.0	9	1	NECTIN2	protein_coding	0	false	3.31896734743923	ENSG00000130202	5819	6.0	1	0.00411783067533562	0	false	0	ENSG00000130202	0
439.344512687916	5.0	0.0	0.2	0.0	9	1	MOSPD2	protein_coding	0	false	1.28780376195942	ENSG00000130150	158747	9.0	1	0.0457565173011966	0	false	0	ENSG00000130150	0
3701.058112244	7.0	0.0	0.14285714285714285	0.0	13	1	SAT1	protein_coding	0	false	1.1590394370313	ENSG00000130066	6303	8.0	1	0.011633684324705	0	false	0	ENSG00000130066	0
18.7857366048371	5.0	0.027405567131484745	0.2	0.0	9	2	DNAJC18	protein_coding	1	false	-0.486016999072838	ENSG00000170464	202052	2.0	1	0.729778965460219	0	false	0	ENSG00000170464	92331
16.9297650920836	5.5	0.028076080568467165	0.18181818181818182	0.0	10	2	CHRNA10	protein_coding	1	false	1.66918104019241	ENSG00000129749	57053	2.5	1	0.102537951226368	0	false	0	ENSG00000129749	94590
197.900367434593	2.5	0.025119172706927154	0.4	0.0	4	3	THOC7	protein_coding	2	false	-0.537483381726322	ENSG00000163634	80145	3.0	1	0.414154946736039	0	false	0	ENSG00000163634	84628
42.5342141827884	3.0	0.007876084130291535	0.3333333333333333	0.0	5	3	BCL2L2	protein_coding	2	false	0.64389628361292	ENSG00000129473	599	2.3333333333333335	1	0.416634011456523	0	false	0	ENSG00000129473	26535
33.0415543359415	5.5	0.002362676829738859	0.18181818181818182	0.0	10	2	C1orf50	protein_coding	1	false	-0.268528224705773	ENSG00000164008	79078	1.5	1	0.735905301692222	0	false	0	ENSG00000164008	7960
55.5329720373007	6.0	0.0	0.16666666666666666	0.0	11	1	ADCY4	protein_coding	0	false	1.81064161617904	ENSG00000129467	196883	2.0	1	0.0156998156011272	0	false	0	ENSG00000129467	0
57.1751486492763	4.0	0.001649718319056354	0.25	0.0	7	2	NCAM1	protein_coding	1	false	-0.632639815058261	ENSG00000149294	4684	4.0	1	0.545287387191475	0	false	0	ENSG00000149294	5558
449.67322390655	4.5	0.0	0.2222222222222222	0.0	8	1	SIGLEC9	protein_coding	0	false	1.46548679860111	ENSG00000129450	27180	2.0	1	0.00937166212696206	0	false	0	ENSG00000129450	0
1406.74854047427	3.0	0.0	0.3333333333333333	0.0	5	1	PHF20L1	protein_coding	0	false	1.01090719900513	ENSG00000129292	51105	7.0	1	0.0114184840583742	0	false	0	ENSG00000129292	0
45.4991889287255	5.0	0.0	0.2	0.0	9	1	ALDH1A2	protein_coding	0	false	3.34813070163689	ENSG00000128918	8854	2.0	1	7.37662845188155E-4	0	false	0	ENSG00000128918	0
58.5766805512992	13.5	0.006088938754430019	0.07407407407407407	0.0	26	2	CIP2A	protein_coding	1	false	-0.157967764980361	ENSG00000163507	57650	1.5	1	0.894463841774673	0	false	0	ENSG00000163507	20514
272.215895414934	14.0	0.0	0.07142857142857142	0.0	27	1	LRRC4	protein_coding	0	false	1.55921884577651	ENSG00000128594	64101	2.0	1	0.0258596915758969	0	false	0	ENSG00000128594	0
120.233815198839	4.0	0.003031409354538061	0.25	0.0	7	2	POT1	protein_coding	1	false	-0.070964782914096	ENSG00000128513	25913	7.0	1	0.927567365731374	0	false	0	ENSG00000128513	10213
352.504992203069	2.0	0.0	0.5	0.0	3	1	DOCK4	protein_coding	0	false	2.39335919158552	ENSG00000128512	9732	188.0	1	0.00115684225579102	0	false	0	ENSG00000128512	0
438.825956060301	14.0	0.006291072287225517	0.07142857142857142	0.0	27	2	VHL	protein_coding	1	false	-0.154659532801318	ENSG00000134086	7428	3.0	1	0.734764467455819	0	false	0	ENSG00000134086	21195
996.632988875336	14.5	0.0	0.06896551724137931	0.0	28	1	APOBEC3A	protein_coding	0	false	2.52131472371749	ENSG00000128383		2.0	1	2.41220831884172E-6	0	false	0	ENSG00000128383	0
362.088291667838	27.0	0.0	0.037037037037037035	0.0	53	1	APOL2	protein_coding	0	false	1.08248269071117	ENSG00000128335	23780	5.0	1	0.0408452690921597	0	false	0	ENSG00000128335	0
812.554365152483	2.0	0.0	0.5	0.0	3	1	YWHAH	protein_coding	0	false	1.17712960789777	ENSG00000128245	7533	188.0	1	0.0189245623341639	0	false	0	ENSG00000128245	0
328.789297508828	2.0	0.0	0.5	0.0	3	1	POR	protein_coding	0	false	1.46046522096474	ENSG00000127948	5447	188.0	1	0.0073134949545409	0	false	0	ENSG00000127948	0
469.302519023577	2.0	0.0	0.5	0.0	3	1	HIP1	protein_coding	0	false	1.37694874607756	ENSG00000127946	3092	188.0	1	7.4915728694805E-4	0	false	0	ENSG00000127946	0
1271.26919591066	2.0	9.421025449235097E-4	0.5	0.0	3	2	AKAP9	protein_coding	1	false	-0.134844419437191	ENSG00000127914	10142	94.5	1	0.823052898841811	0	false	0	ENSG00000127914	3174
1063.22121160876	2.0	0.0014478816049580594	0.5	0.0	3	2	TUBA4A	protein_coding	1	false	0.591894119132499	ENSG00000127824	7277	94.5	1	0.312369585376096	0	false	0	ENSG00000127824	4878
36.7696201507893	8.5	0.0069669284607575994	0.11764705882352941	0.0	16	2	GFER	protein_coding	1	false	0.169555786111719	ENSG00000127554	2671	2.5	1	0.875662629269947	0	false	0	ENSG00000127554	23472
87.0247089060378	21.5	0.009673914979252372	0.046511627906976744	0.0	42	2	MFSD5	protein_coding	1	false	0.29642979086479	ENSG00000182544	84975	5.0	1	0.684547743216781	0	false	0	ENSG00000182544	32592
1237.45606301535	22.0	0.0	0.045454545454545456	0.0	43	1	ADGRE2	protein_coding	0	false	1.58466829544791	ENSG00000127507	30817	2.0	1	0.0065437783879744	0	false	0	ENSG00000127507	0
1675.27475490494	28.0	0.02822597401055487	0.03571428571428571	0.0	55	2	RAP1B	protein_coding	1	false	-0.0642186258389804	ENSG00000127314	5908	3.0	1	0.913218170683602	0	false	0	ENSG00000127314	95095
31.4252859609182	13.5	1.2037500074204674	0.07407407407407407	0.0	26	4	ARL2	protein_coding	3	false	0.498312943936328	ENSG00000213465	402	1.75	1	0.527243393796117	0	false	0	ENSG00000213465	4055506
15.8539299896601	28.0	0.1839830694615115	0.03571428571428571	0.0	55	2	PIGW	protein_coding	1	false	-1.06101869231366	ENSG00000277161	284098	5.0	1	0.348972321153647	0	false	0	ENSG00000277161	619850
54.1002809849845	28.5	0.17449615026149726	0.03508771929824561	0.0	56	4	IPPK	protein_coding	3	false	0.503400317802883	ENSG00000127080	64768	2.25	1	0.263053598228574	0	false	0	ENSG00000127080	587888
78.290721268897	12.5	0.008512760235792772	0.08	0.0	24	2	ELK1	protein_coding	1	false	-0.104604257009778	ENSG00000126767	2002	1.5	1	0.901797210447645	0	false	0	ENSG00000126767	28680
236.890159581605	10.5	0.0	0.09523809523809523	0.0	20	1	CFP	protein_coding	0	false	1.33077684087638	ENSG00000126759	5199	2.0	1	0.037698456813257	0	false	0	ENSG00000126759	0
160.683302181986	4.0	0.008699459196333695	0.25	0.0	7	4	GPAA1	protein_coding	3	false	0.271171798001132	ENSG00000197858	8733	1.5	1	0.684450357496176	0	false	0	ENSG00000197858	29309
490.723067924815	4.5	0.0	0.2222222222222222	0.0	8	1	IFI6	protein_coding	0	false	2.26223598455592	ENSG00000126709	2537	4.0	1	0.0304094134914215	0	false	0	ENSG00000126709	0
295.131888472148	6.5	0.07571013873305907	0.15384615384615385	0.0	12	2	FRMD8	protein_coding	1	false	0.529447137248541	ENSG00000126391	83786	3.0	1	0.157970300304836	0	false	0	ENSG00000126391	255072
800.580428213224	21.0	0.0	0.047619047619047616	0.0	41	1	FFAR2	protein_coding	0	false	1.65227087744273	ENSG00000126262	2867	9.0	1	0.0446950962603104	0	false	0	ENSG00000126262	0
91.6918167022926	8.5	0.3576261627872463	0.11764705882352941	0.0	16	4	EIF1AD	protein_coding	3	false	-0.287309963521714	ENSG00000175376	84285	1.75	1	0.597908781879955	0	false	0	ENSG00000175376	1204864
51.7904788784382	8.5	0.07570064053474856	0.11764705882352941	0.0	16	2	LRATD2	protein_coding	1	false	-1.21783942485297	ENSG00000168672	157638	2.5	1	0.0562231911953439	0	false	0	ENSG00000168672	255040
85.5502066105586	4.0	0.00823196974823838	0.25	0.0	7	2	HIKESHI	protein_coding	1	false	-0.135407349829428	ENSG00000149196	51501	2.0	1	0.827015779019232	0	false	0	ENSG00000149196	27734
17.7317414167386	4.5	0.00759855864840638	0.2222222222222222	0.0	8	2	SIRPD	protein_coding	1	false	1.39312547101485	ENSG00000125900	128646	2.0	1	0.168567137358894	0	false	0	ENSG00000125900	25600
244.373781094021	9.0	0.03994853163790493	0.1111111111111111	0.0	17	2	AP5Z1	protein_coding	1	false	0.613751973594787	ENSG00000242802	9907	2.0	1	0.203948850677854	0	false	0	ENSG00000242802	134589
51.037792101063	9.5	0.038237965485921885	0.10526315789473684	0.0	18	2	AP5S1	protein_coding	1	false	-0.084778702652339	ENSG00000125843	55317	2.0	1	0.929638177138948	0	false	0	ENSG00000125843	128826
2242.59048186873	2.0	0.0	0.5	0.0	3	1	VASP	protein_coding	0	false	1.18479289972477	ENSG00000125753	7408	188.0	1	0.0219756089987427	0	false	0	ENSG00000125753	0
42.1449056965985	7.0	0.0	0.14285714285714285	0.0	13	1	RTN2	protein_coding	0	false	2.08252486604025	ENSG00000125744	6253	2.0	1	0.0274520753619265	0	false	0	ENSG00000125744	0
154.471327747046	7.5	0.7404617311653695	0.13333333333333333	0.0	14	3	SYS1	protein_coding	2	false	-0.13129156446081	ENSG00000204070	90196	2.3333333333333335	1	0.864939110277285	0	false	0	ENSG00000204070	2494660
302.160857349941	8.0	0.0	0.1250	0.0	15	1	TNFSF14	protein_coding	0	false	1.74087015013159	ENSG00000125735	8740	3.0	1	0.0147772138904919	0	false	0	ENSG00000125735	0
28.4715067318691	18.0	0.08441820567161167	0.05555555555555555	0.0	35	3	RIN1	protein_coding	2	false	0.601147781063268	ENSG00000174791	9610	2.6666666666666665	1	0.640110730841848	0	false	0	ENSG00000174791	284410
13.7958498365924	18.5	0.015184057274135812	0.05405405405405406	0.0	36	2	TRIP10	protein_coding	1	false	0.659648480154109	ENSG00000125733	9322	2.0	1	0.708444145902564	0	false	0	ENSG00000125733	51156
104.048976888825	9.5	0.3808516322060159	0.10526315789473684	0.0	18	6	SLC25A30	protein_coding	5	false	-0.162936050462737	ENSG00000174032	253512	2.0	1	0.809307332321396	0	false	0	ENSG00000174032	1283112
99.6958184488923	10.0	0.0	0.1	0.0	19	1	OPRL1	protein_coding	0	false	1.59985322239978	ENSG00000125510	4987	6.0	1	0.0324270196763309	0	false	0	ENSG00000125510	0
216.031706495643	20.0	1.3846316183149008	0.05	0.0	39	5	TM2D3	protein_coding	4	false	0.188277131493102	ENSG00000184277	80213	3.2	1	0.698045625277645	0	false	0	ENSG00000184277	4664907
1249.30897866915	20.5	0.0	0.04878048780487805	0.0	40	1	MBOAT7	protein_coding	0	false	1.32099860722096	ENSG00000125505	79143	5.0	1	0.0165309275810828	0	false	0	ENSG00000125505	0
357.930763767424	17.0	0.007316877704760378	0.058823529411764705	0.0	33	2	SS18	protein_coding	1	false	-0.314181664037551	ENSG00000141380	6760	1.5	1	0.312041819888517	0	false	0	ENSG00000141380	24651
3008.37422642718	17.5	0.0	0.05714285714285714	0.0	34	1	IRF1	protein_coding	0	false	1.12181137820367	ENSG00000125347	3659	2.0	1	0.0289166098684431	0	false	0	ENSG00000125347	0
223.368735424998	9.0	0.07666767585023715	0.1111111111111111	0.0	17	2	UROD	protein_coding	1	false	-0.325736313582953	ENSG00000126088	7389	2.0	1	0.72859920802475	0	false	0	ENSG00000126088	258298
156.310260657904	9.5	0.07719720040604797	0.10526315789473684	0.0	18	2	CPNE5	protein_coding	1	false	0.679593789998221	ENSG00000124772	57699	2.5	1	0.362126298548812	0	false	0	ENSG00000124772	260082
83.9799425386031	4.5	0.0038182757208242058	0.2222222222222222	0.0	8	2	HPRT1	protein_coding	1	false	-0.853439217922631	ENSG00000165704	3251	3.5	1	0.158440183741824	0	false	0	ENSG00000165704	12864
10.8588060662978	5.0	0.0933937062563445	0.2	0.0	9	3	PARS2	protein_coding	2	false	0.608863423783669	ENSG00000162396	25973	1.6666666666666667	1	0.716676362949412	0	false	0	ENSG00000162396	314649
320.34071755741	5.5	0.0	0.18181818181818182	0.0	10	1	NQO2	protein_coding	0	false	1.4601393130234	ENSG00000124588	4835	3.0	1	0.022555220237569	0	false	0	ENSG00000124588	0
154.216478932695	9.5	0.005700699898488005	0.10526315789473684	0.0	18	2	SEC11C	protein_coding	1	false	0.153819077162961	ENSG00000166562	90701	2.0	1	0.894909463491123	0	false	0	ENSG00000166562	19206
7.87253895326131	5.5	0.0013267795764990828	0.18181818181818182	0.0	10	2	MT-ATP8	protein_coding	1	false	-1.53130886480546	ENSG00000228253	4509	2.0	1	0.368850402233173	0	false	0	ENSG00000228253	4470
655.760891522881	7.5	0.0	0.13333333333333333	0.0	14	1	NAGK	protein_coding	0	false	1.11623840976949	ENSG00000124357	55577	5.0	1	0.035547681760468	0	false	0	ENSG00000124357	0
303.367412418812	2.0	0.0	0.5	0.0	3	1	ZBP1	protein_coding	0	false	1.67176486026853	ENSG00000124256	81030	11.0	1	0.0395539526945002	0	false	0	ENSG00000124256	0
37.4396471113716	1.5	0.004645806248627213	0.6666666666666666	0.0	2	6	TARBP2	protein_coding	5	false	0.0832749245930529	ENSG00000139546	6895	2.0	1	0.945409876677385	0	false	0	ENSG00000139546	15652
5366.03387898988	2.0	0.0	0.5	0.0	3	1	PREX1	protein_coding	0	false	1.16285687699091	ENSG00000124126	57580	188.0	1	0.0235680234161749	0	false	0	ENSG00000124126	0
6.75587721224232	9.0	0.003698657785851246	0.1111111111111111	0.0	17	2	NBL1	protein_coding	1	false	-0.223362656469717	ENSG00000158747		1.5	1	0.941519702047762	0	false	0	ENSG00000158747	12461
143.874481453297	9.5	0.0	0.10526315789473684	0.0	18	1	SLPI	protein_coding	0	false	2.7266981283509	ENSG00000124107	6590	2.0	1	0.0166350323788009	0	false	0	ENSG00000124107	0
26.2709793917177	31.0	0.0	0.03225806451612903	0.0	61	1	SNX21	protein_coding	0	false	1.52932311197359	ENSG00000124104	90203	4.0	1	0.0443829100690849	0	false	0	ENSG00000124104	0
552.991115879806	2.0	0.0	0.5	0.0	3	1	PFKFB2	protein_coding	0	false	2.75061421305098	ENSG00000123836	5208	188.0	1	0.00190639276905764	0	false	0	ENSG00000123836	0
89.4082522340939	13.5	0.0023074685520590313	0.07407407407407407	0.0	26	2	UCK1	protein_coding	1	false	0.4885580544549	ENSG00000130717	83549	2.0	1	0.511277286989943	0	false	0	ENSG00000130717	7774
228.62394796413	8.5	0.0034573441850249027	0.11764705882352941	0.0	16	2	RNPEP	protein_coding	1	false	0.356522463273584	ENSG00000176393	6051	1.5	1	0.487817860280738	0	false	0	ENSG00000176393	11648
853.516493701217	9.0	0.0	0.1111111111111111	0.0	17	1	KCNJ2	protein_coding	0	false	2.17188059458719	ENSG00000123700	3759	2.0	1	0.0158043641200381	0	false	0	ENSG00000123700	0
194.777828264727	31.0	0.0	0.03225806451612903	0.0	61	1	TNFAIP6	protein_coding	0	false	2.0956480007402	ENSG00000123610	7130	4.0	1	0.0327402379900947	0	false	0	ENSG00000123610	0
2751.72053731073	2.0	0.0	0.5	0.0	3	1	ADGRE5	protein_coding	0	false	1.01828925142536	ENSG00000123146	976	188.0	1	0.0235670633489271	0	false	0	ENSG00000123146	0
192.3008458254	2.0	0.001996402557389895	0.5	0.0	3	3	DDX39A	protein_coding	2	false	-0.144307932604189	ENSG00000123136	10212	63.333333333333336	1	0.807758297454262	0	false	0	ENSG00000123136	6726
8434.14835307874	9.5	0.0	0.10526315789473684	0.0	18	1	SRGN	protein_coding	0	false	1.32026580405755	ENSG00000122862	5552	2.0	1	0.031460230297826	0	false	0	ENSG00000122862	0
159.86187915592	2.0	0.0	0.5	0.0	3	1	CALD1	protein_coding	0	false	1.92124758764602	ENSG00000122786	800	188.0	1	0.036252826524113	0	false	0	ENSG00000122786	0
206.533839947636	13.5	0.2098175752286988	0.07407407407407407	0.0	26	2	NKIRAS2	protein_coding	1	false	-0.324659347870918	ENSG00000168256	28511	2.5	1	0.541168324364729	0	false	0	ENSG00000168256	706888
432.886358633056	14.0	0.21210931238980604	0.07142857142857142	0.0	27	3	DCAF10	protein_coding	2	false	-0.551228641252182	ENSG00000122741	79269	2.3333333333333335	1	0.386711020667319	0	false	0	ENSG00000122741	714609
842.77592093135	4.0	0.0	0.25	0.0	7	1	GLIPR2	protein_coding	0	false	1.15931853558782	ENSG00000122694	152007	2.0	1	0.0168166056378494	0	false	0	ENSG00000122694	0
32.1342926722579	8.0	0.0	0.1250	0.0	15	1	FKBP9	protein_coding	0	false	1.76260906656967	ENSG00000122642	11328	3.0	1	0.0135951786325643	0	false	0	ENSG00000122642	0
2280.81458519835	1.5	0.0010762645960594348	0.6666666666666666	0.0	2	2	HNRNPA2B1	protein_coding	1	false	-0.385017889881308	ENSG00000122566	3181	3.0	1	0.191543971361111	0	false	0	ENSG00000122566	3626
133.281887123203	5.0	0.005393492546882513	0.2	0.0	9	2	SLC35A4	protein_coding	1	false	-0.133814581648813	ENSG00000176087	113829	3.5	1	0.816030320215474	0	false	0	ENSG00000176087	18171
453.14585250984	5.5	0.003867547624559966	0.18181818181818182	0.0	10	2	HERPUD2	protein_coding	1	false	-0.460909211865793	ENSG00000122557	64224	1.5	1	0.218125046945118	0	false	0	ENSG00000122557	13030
71.4571031206359	3.0	0.1620956587297347	0.3333333333333333	0.0	5	3	MSRB3	protein_coding	2	false	0.966673647825742	ENSG00000174099	253827	3.0	1	0.129574605009502	0	false	0	ENSG00000174099	546110
134.898752553877	3.5	0.0025645135438371533	0.2857142857142857	0.0	6	2	KLHL7	protein_coding	1	false	-0.34180406931559	ENSG00000122550	55975	2.0	1	0.373595482031682	0	false	0	ENSG00000122550	8640
501.977049755533	6.5	0.002536018948905629	0.15384615384615385	0.0	12	2	NDFIP1	protein_coding	1	false	-0.132231330862835	ENSG00000131507	80762	2.0	1	0.771021532796465	0	false	0	ENSG00000131507	8544
24.6248793254043	7.0	0.0	0.14285714285714285	0.0	13	1	PTGFR	protein_coding	0	false	3.7040746486738	ENSG00000122420	5737	2.0	1	0.0199329752981146	0	false	0	ENSG00000122420	0
358.951929373722	2.0	0.022541005503018643	0.5	0.0	3	4	FYTTD1	protein_coding	3	false	-0.153495662494853	ENSG00000122068	84248	5.75	1	0.734764467455819	0	false	0	ENSG00000122068	75942
340.536688628699	12.0	0.1296005413973037	0.08333333333333333	0.0	23	2	REV1	protein_coding	1	false	-0.720171678465341	ENSG00000135945	51455	2.0	1	0.0798995877738082	0	false	0	ENSG00000135945	436632
277.857221775458	12.5	0.13018468059339994	0.08	0.0	24	2	POLK	protein_coding	1	false	-0.430455963282833	ENSG00000122008	51426	2.0	1	0.219972544714613	0	false	0	ENSG00000122008	438600
417.337579527389	2.0	0.0016170682623639827	0.5	0.0	3	2	KHDRBS1	protein_coding	1	false	-0.267235431383325	ENSG00000121774	10657	94.5	1	0.391145598389604	0	false	0	ENSG00000121774	5448
156.929655455718	7.5	0.1263301929915169	0.13333333333333333	0.0	14	2	DESI2	protein_coding	1	false	-0.00393469249469777	ENSG00000121644	51029	2.5	1	0.996518358689906	0	false	0	ENSG00000121644	425614
49.8504464876032	12.0	0.011414459819652958	0.08333333333333333	0.0	23	2	LSM2	protein_coding	1	false	0.121908313381875	ENSG00000204392	57819	2.5	1	0.916486612357111	0	false	0	ENSG00000204392	38456
24.5116114918519	12.5	1.146608252747057	0.08	0.0	24	4	PMVK	protein_coding	3	false	-0.0701160294734385	ENSG00000163344	10654	2.0	1	0.962726313556602	0	false	0	ENSG00000163344	3862992
1493.26611359337	13.0	0.0	0.07692307692307693	0.0	25	1	PLBD1	protein_coding	0	false	1.61580058087542	ENSG00000121316	79887	4.0	1	0.0395539526945002	0	false	0	ENSG00000121316	0
277.675316858468	14.5	0.6981009539752928	0.06896551724137931	0.0	28	4	TWF2	protein_coding	3	false	0.424562833426183	ENSG00000247596	11344	2.75	1	0.441058041814529	0	false	0	ENSG00000247596	2351944
461.189822837206	15.0	0.1221955085394739	0.06666666666666667	0.0	29	3	SCPEP1	protein_coding	2	false	0.675099204555477	ENSG00000121064	59342	4.0	1	0.253081903175408	0	false	0	ENSG00000121064	411684
2034.88206282555	3.5	0.007698883368061121	0.2857142857142857	0.0	6	4	TRIM25	protein_coding	3	false	1.78790559038571	ENSG00000121060	7706	4.0	1	3.88126544195509E-5	0	false	0	ENSG00000121060	25938
263.918430646676	10.5	0.005811710091242067	0.09523809523809523	0.0	20	2	TNFRSF10B	protein_coding	1	false	0.231852506537938	ENSG00000120889	8795	2.5	1	0.674705241142327	0	false	0	ENSG00000120889	19580
2129.12393018328	2.0	0.0	0.5	0.0	3	1	CLU	protein_coding	0	false	1.30539549342423	ENSG00000120885	1191	188.0	1	0.0395539526945002	0	false	0	ENSG00000120885	0
1186.72782817462	14.0	0.0	0.07142857142857142	0.0	27	1	APAF1	protein_coding	0	false	1.20899919030359	ENSG00000120868	317	2.0	1	0.0160824840337344	0	false	0	ENSG00000120868	0
128.806707700782	6.0	0.014166859598819848	0.16666666666666666	0.0	11	2	NFYB	protein_coding	1	false	-0.665327070065673	ENSG00000120837	4801	2.0	1	0.267072283251685	0	false	0	ENSG00000120837	47729
28.9999585633122	6.0	0.015463066849506983	0.16666666666666666	0.0	11	3	TMEM79	protein_coding	2	false	0.814517267958007	ENSG00000163472	84283	2.3333333333333335	1	0.331026770072212	0	false	0	ENSG00000163472	52096
1087.43113292518	6.5	0.005232319994301081	0.15384615384615385	0.0	12	2	SERP1	protein_coding	1	false	0.21180640822282	ENSG00000120742	27230	2.0	1	0.682801513036259	0	false	0	ENSG00000120742	17628
696.214111790671	11.5	0.0	0.08695652173913043	0.0	22	1	FAM53C	protein_coding	0	false	1.04023559785236	ENSG00000120709		4.0	1	0.0311875169906339	0	false	0	ENSG00000120709	0
353.273113107143	5.5	0.012276421316331557	0.18181818181818182	0.0	10	2	TSPAN33	protein_coding	1	false	0.678878787286734	ENSG00000158457	340348	2.0	1	0.373884774933815	0	false	0	ENSG00000158457	41360
30.9099593460196	6.0	0.011244679524852629	0.16666666666666666	0.0	11	2	PDZD11	protein_coding	1	false	-0.258468234782207	ENSG00000120509	51248	2.5	1	0.79323865245945	0	false	0	ENSG00000120509	37884
152.189978363332	3.5	0.01495610051468362	0.2857142857142857	0.0	6	3	NELFB	protein_coding	2	false	0.197706456212052	ENSG00000188986	25920	3.0	1	0.725050256096283	0	false	0	ENSG00000188986	50388
181.943948685269	4.0	0.0	0.25	0.0	7	1	CD274	protein_coding	0	false	2.30506991940322	ENSG00000120217	29126	3.0	1	0.0208589260867621	0	false	0	ENSG00000120217	0
1861.93107941515	5.0	0.004744350056098734	0.2	0.0	9	2	GNA13	protein_coding	1	false	0.530493231302139	ENSG00000120063	10672	3.5	1	0.228210182999038	0	false	0	ENSG00000120063	15984
8.5870062950501	4.5	0.005632431598131229	0.2222222222222222	0.0	8	2	NME2	protein_coding	1	false	-1.31440007862543	ENSG00000243678	4831	2.5	1	0.282100666934588	0	false	0	ENSG00000243678	18976
34.7285545499233	5.0	0.00450125554308917	0.2	0.0	9	2	GOT1	protein_coding	1	false	-0.138170352553352	ENSG00000120053	2805	1.5	1	0.91198752100881	0	false	0	ENSG00000120053	15165
43.9532082525833	4.5	0.01255899271606917	0.2222222222222222	0.0	8	3	LIN52	protein_coding	2	false	-0.483530094956293	ENSG00000205659	91750	2.3333333333333335	1	0.54411459470166	0	false	0	ENSG00000205659	42312
176.620879161341	5.0	0.004594753432708233	0.2	0.0	9	2	BCL11A	protein_coding	1	false	-0.109069675407045	ENSG00000119866	53335	2.0	1	0.915184784316525	0	false	0	ENSG00000119866	15480
386.807938521712	12.0	0.0	0.08333333333333333	0.0	23	1	LGALSL	protein_coding	0	false	1.48289117897431	ENSG00000119862	29094	2.0	1	0.00258763821028144	0	false	0	ENSG00000119862	0
17.1357785348272	6.5	0.0068885683246959085	0.15384615384615385	0.0	12	2	CDC42BPG	protein_coding	1	false	0.00153119563870607	ENSG00000171219	55561	4.5	1	0.998821881951463	0	false	0	ENSG00000171219	23208
492.875614929571	7.0	0.004834879758745763	0.14285714285714285	0.0	13	2	RHOQ	protein_coding	1	false	0.636706287352553	ENSG00000119729	23433	1.5	1	0.245939585181455	0	false	0	ENSG00000119729	16289
158.018872876885	11.5	0.004459997744177901	0.08695652173913043	0.0	22	2	FCF1	protein_coding	1	false	-0.484097194595771	ENSG00000119616	51077	2.5	1	0.158488926227543	0	false	0	ENSG00000119616	15026
8506.35630232215	34.5	0.0	0.028985507246376812	0.0	68	1	CSF3R	protein_coding	0	false	1.61656528997547	ENSG00000119535	1441	2.0	1	0.00552952371290366	0	false	0	ENSG00000119535	0
40.5800760197025	13.0	0.1305779653671944	0.07692307692307693	0.0	25	2	DTD1	protein_coding	1	false	-0.18423080458877	ENSG00000125821	92675	2.0	1	0.805580304586377	0	false	0	ENSG00000125821	439925
963.702533167633	1.0	2.0064943930948097E-4	1.0	0.0	1	2	STAU1	protein_coding	1	false	-0.395858995728688	ENSG00000124214	6780	14.0	1	0.649204205470104	0	false	0	ENSG00000124214	676
249.818227377284	1.5	0.0	0.6666666666666666	0.0	2	1	TRPM6	protein_coding	0	false	2.06775571266382	ENSG00000119121	140803	2.0	1	0.0185685139278219	0	false	0	ENSG00000119121	0
1108.33150181135	2.0	0.0	0.5	0.0	3	1	UBN1	protein_coding	0	false	1.49972663511293	ENSG00000118900	29855	188.0	1	0.00527523785925104	0	false	0	ENSG00000118900	0
3182.61723380622	4.0	0.0	0.25	0.0	7	1	FBXL5	protein_coding	0	false	1.18165461971519	ENSG00000118564	26234	13.0	1	0.033941983303739	0	false	0	ENSG00000118564	0
12.0943919342752	3.5	0.0011967729871240047	0.2857142857142857	0.0	6	2	FABP5	protein_coding	1	false	0.171086044495988	ENSG00000164687	2171	2.0	1	0.934552867135257	0	false	0	ENSG00000164687	4032
409.848982542456	4.0	0.0	0.25	0.0	7	1	ARG1	protein_coding	0	false	2.8282352906826	ENSG00000118520	383	2.0	1	0.0065437783879744	0	false	0	ENSG00000118520	0
1858.06534636058	2.0	0.0028548022297020534	0.5	0.0	3	4	HNRNPH1	protein_coding	3	false	-0.16964931030924	ENSG00000169045	3187	47.75	1	0.733587156648947	0	false	0	ENSG00000169045	9618
623.817470274107	2.5	0.0	0.4	0.0	4	1	KLF7	protein_coding	0	false	1.287272144086	ENSG00000118263	8609	4.0	1	0.00320478198536384	0	false	0	ENSG00000118263	0
158.980848787913	1.5	0.0010798264204258754	0.6666666666666666	0.0	2	2	DDX59	protein_coding	1	false	0.158330474263791	ENSG00000118197	83479	3.0	1	0.771339311485359	0	false	0	ENSG00000118197	3638
16.0321657428576	3.0	0.01684297697280547	0.3333333333333333	0.0	5	2	KPTN	protein_coding	1	false	0.484173669476662	ENSG00000118162	11133	2.5	1	0.687493420459431	0	false	0	ENSG00000118162	56745
10543.9823051041	2.5	0.13322885315191774	0.4	0.0	4	4	PSAP	protein_coding	3	false	0.345951171959303	ENSG00000197746	5660	2.25	1	0.509747642848527	0	false	0	ENSG00000197746	448856
1013.16795095438	3.0	0.0	0.3333333333333333	0.0	5	1	CTSD	protein_coding	0	false	1.06865821630863	ENSG00000117984	1509	4.0	1	0.00527523785925104	0	false	0	ENSG00000117984	0
247.25527960805	1.5	0.003160525487821529	0.6666666666666666	0.0	2	4	PTBP2	protein_coding	3	false	0.432269027253935	ENSG00000117569	58155	1.25	1	0.212540537178635	0	false	0	ENSG00000117569	10648
32.1814971530239	15.5	0.010284767858096917	0.06451612903225806	0.0	30	2	FASLG	protein_coding	1	false	0.18093164108838	ENSG00000117560	356	2.5	1	0.920276455340303	0	false	0	ENSG00000117560	34650
34.7335651634276	3.0	0.0045680397499599295	0.3333333333333333	0.0	5	2	CENPO	protein_coding	1	false	0.0905108807656653	ENSG00000138092	79172	3.0	1	0.952139257180665	0	false	0	ENSG00000138092	15390
53.5149204135388	3.5	0.004304464746843333	0.2857142857142857	0.0	6	2	ERI3	protein_coding	1	false	-0.362170471883282	ENSG00000117419	79033	2.0	1	0.612558334564293	0	false	0	ENSG00000117419	14502
36.1627126491866	16.0	0.015237484639632419	0.0625	0.0	31	2	CR2	protein_coding	1	false	0.214945535749021	ENSG00000117322	1380	1.5	1	0.890721468842793	0	false	0	ENSG00000117322	51336
1428.8760351021	2.0	0.0	0.5	0.0	3	1	ECE1	protein_coding	0	false	1.49344051144353	ENSG00000117298	1889	188.0	1	1.31456801390404E-4	0	false	0	ENSG00000117298	0
1066.4970777846	13.0	0.0	0.07692307692307693	0.0	25	1	GBP1	protein_coding	0	false	1.89783708381231	ENSG00000117228	2633	7.0	1	0.0339705880527506	0	false	0	ENSG00000117228	0
334.116398426857	2.0	0.005334722444836245	0.5	0.0	3	4	SSX2IP	protein_coding	3	false	0.386698079847835	ENSG00000117155	117178	5.75	1	0.646131504809285	0	false	0	ENSG00000117155	17973
528.582310156028	2.0	0.0013686310128047585	0.5	0.0	3	2	KDM5B	protein_coding	1	false	0.950525335585006	ENSG00000117139	10765	94.5	1	0.0160975894733668	0	false	0	ENSG00000117139	4611
454.564538255608	4.5	0.0015529554237680538	0.2222222222222222	0.0	8	2	MTMR14	protein_coding	1	false	0.34551134865616	ENSG00000163719	64419	2.0	1	0.325259631491433	0	false	0	ENSG00000163719	5232
1250.77438186556	5.0	0.0	0.2	0.0	9	1	PADI2	protein_coding	0	false	1.52279368241985	ENSG00000117115	11240	2.0	1	0.044876046421119	0	false	0	ENSG00000117115	0
744.474304469926	2.0	0.0	0.5	0.0	3	1	SIPA1L2	protein_coding	0	false	2.57093543295021	ENSG00000116991	57568	188.0	1	2.57515958056538E-4	0	false	0	ENSG00000116991	0
116.517225324387	6.0	0.006226365811235181	0.16666666666666666	0.0	11	2	ZNF544	protein_coding	1	false	-0.0811658445581231	ENSG00000198131	27300	3.0	1	0.93670143300544	0	false	0	ENSG00000198131	20977
237.133171118002	6.5	0.004473651404249256	0.15384615384615385	0.0	12	2	GNPAT	protein_coding	1	false	0.299499814014114	ENSG00000116906	8443	1.5	1	0.36478460269552	0	false	0	ENSG00000116906	15072
261.774829494344	2.5	0.0	0.4	0.0	4	1	PHTF1	protein_coding	0	false	1.38539194139315	ENSG00000116793	10745	2.0	1	0.0198709451471264	0	false	0	ENSG00000116793	0
78.2995127732673	9.5	0.0	0.10526315789473684	0.0	18	1	PLA2G4A	protein_coding	0	false	1.58123590536865	ENSG00000116711	5321	2.0	1	0.0465291187280026	0	false	0	ENSG00000116711	0
666.378518873519	1.0	0.0015568140668316978	1.0	0.0	1	2	DDX21	protein_coding	1	false	-0.659790269235162	ENSG00000165732	9188	15.0	1	0.0333641369593224	0	false	0	ENSG00000165732	5245
4461.37977549192	1.5	0.0027295447394822293	0.6666666666666666	0.0	2	3	NCF2	protein_coding	2	false	1.18685694560443	ENSG00000116701	4688	2.0	1	0.0396868765240039	0	false	0	ENSG00000116701	9196
1168.48063530586	2.0	0.006194903029331623	0.5	0.0	3	5	SFPQ	protein_coding	4	false	-0.270070484120453	ENSG00000116560	6421	38.4	1	0.467603737439557	0	false	0	ENSG00000116560	20871
254.273409351813	14.0	0.0	0.07142857142857142	0.0	27	1	ELAPOR1	protein_coding	0	false	1.87668419251894	ENSG00000116299	57535	5.0	1	0.0258596915758969	0	false	0	ENSG00000116299	0
36.2396057106261	1.5	0.18983752144515087	0.6666666666666666	0.0	2	10	CCL3	protein_coding	9	false	0.47663552462941	ENSG00000277632	6348	1.3	1	0.749023352724437	0	false	0	ENSG00000277632	639574
378.748504030687	2.0	0.0	0.5	0.0	3	1	QSOX1	protein_coding	0	false	1.14019693960157	ENSG00000116260	5768	10.0	1	5.15533038133616E-4	0	false	0	ENSG00000116260	0
52.0728699016325	9.5	0.139039375968371	0.10526315789473684	0.0	18	3	DUSP28	protein_coding	2	false	0.110668884885521	ENSG00000188542	285193	2.3333333333333335	1	0.911210322072536	0	false	0	ENSG00000188542	468432
109.299703356322	2.0	0.0	0.5	0.0	3	1	EPAS1	protein_coding	0	false	3.53181552854564	ENSG00000116016	2034	188.0	1	2.74328447612997E-4	0	false	0	ENSG00000116016	0
615.49506390711	1.5	0.0021062254753551435	0.6666666666666666	0.0	2	3	TIA1	protein_coding	2	false	0.23369959619213	ENSG00000116001	7072	3.3333333333333335	1	0.321935762245993	0	false	0	ENSG00000116001	7096
2070.5006694945	14.0	0.005112998878025324	0.07142857142857142	0.0	27	2	SARAF	protein_coding	1	false	-0.295744931169765	ENSG00000133872	51669	3.0	1	0.509448216720112	0	false	0	ENSG00000133872	17226
2491.82798883357	14.5	0.0	0.06896551724137931	0.0	28	1	PLEK	protein_coding	0	false	1.05787903981448	ENSG00000115956	5341	2.0	1	0.0165309275810828	0	false	0	ENSG00000115956	0
99.1068557764024	6.0	0.003970246893792334	0.16666666666666666	0.0	11	2	NFATC1	protein_coding	1	false	0.0861415067755385	ENSG00000131196	4772	2.0	1	0.924546668052758	0	false	0	ENSG00000131196	13376
17.0476843160241	2.0	0.0	0.5	0.0	3	1	ABCB6	protein_coding	0	false	2.67105352229794	ENSG00000115657	10058	188.0	1	0.0376368786831735	0	false	0	ENSG00000115657	0
82.1960836789958	2.0	5.645491620808178E-4	0.5	0.0	3	2	PIGA	protein_coding	1	false	-0.22760215583566	ENSG00000165195	5277	3.0	1	0.721870409190517	0	false	0	ENSG00000165195	1902
1150.30226052107	2.5	0.0	0.4	0.0	4	1	IL18RAP	protein_coding	0	false	2.27756603890441	ENSG00000115607	8807	2.0	1	0.00705314577595528	0	false	0	ENSG00000115607	0
1058.31294316815	2.5	0.0	0.4	0.0	4	1	IL18R1	protein_coding	0	false	3.53549952777413	ENSG00000115604	8809	2.0	1	2.91447746220906E-4	0	false	0	ENSG00000115604	0
62.542848200016	6.0	0.0020602185772886205	0.16666666666666666	0.0	11	2	TSPAN18	protein_coding	1	false	0.194857712034207	ENSG00000157570	90139	1.5	1	0.840490610349913	0	false	0	ENSG00000157570	6941
99.5141263416809	6.5	0.0	0.15384615384615385	0.0	12	1	IL1RL1	protein_coding	0	false	3.62028930376824	ENSG00000115602	9173	2.0	1	0.00335144106063844	0	false	0	ENSG00000115602	0
418.978613404244	14.0	0.0	0.07142857142857142	0.0	27	1	IL1R1	protein_coding	0	false	3.05874435578261	ENSG00000115594	3554	2.0	1	2.50289790669924E-5	0	false	0	ENSG00000115594	0
2364.20895607466	14.0	0.0	0.07142857142857142	0.0	27	1	IL1R2	protein_coding	0	false	3.84592031803745	ENSG00000115590	7850	2.0	1	0.00202017704426238	0	false	0	ENSG00000115590	0
90.6169140040032	24.0	0.9339845535549974	0.041666666666666664	0.0	47	3	CHIC1	protein_coding	2	false	-0.757727489492365	ENSG00000204116	53344	2.3333333333333335	1	0.171318520341553	0	false	0	ENSG00000204116	3146650
109.109362393434	24.5	0.022695944862958808	0.04081632653061224	0.0	48	2	TXNDC9	protein_coding	1	false	0.0544011703204999	ENSG00000115514	10190	2.0	1	0.951531105368668	0	false	0	ENSG00000115514	76464
282.496495043602	6.0	0.0020406285432731978	0.16666666666666666	0.0	11	2	MSI2	protein_coding	1	false	-0.391197771967336	ENSG00000153944	124540	1.5	1	0.435493819970881	0	false	0	ENSG00000153944	6875
88.0772624920843	6.5	0.0	0.15384615384615385	0.0	12	1	LOXL3	protein_coding	0	false	1.68647084964092	ENSG00000115318	84695	2.0	1	0.0244891234798127	0	false	0	ENSG00000115318	0
915.827549323566	2.0	5.636587059892076E-4	0.5	0.0	3	2	SPTBN1	protein_coding	1	false	-0.0163043671880975	ENSG00000115306	6711	94.5	1	0.977289070376175	0	false	0	ENSG00000115306	1899
118.361717547803	10.0	0.0035078033635494764	0.1	0.0	19	2	ICMT	protein_coding	1	false	-0.275690630296919	ENSG00000116237	23463	2.0	1	0.756136502933695	0	false	0	ENSG00000116237	11818
3380.97268347715	10.5	0.0	0.09523809523809523	0.0	20	1	GCA	protein_coding	0	false	1.86534930028174	ENSG00000115271	25801	2.0	1	0.018975489571227	0	false	0	ENSG00000115271	0
401.128361867679	2.0	0.0	0.5	0.0	3	1	GPD2	protein_coding	0	false	1.39463334656653	ENSG00000115159	2820	188.0	1	0.00157102278005373	0	false	0	ENSG00000115159	0
349.390177572335	3.0	0.0020703104129935353	0.3333333333333333	0.0	5	2	KANSL3	protein_coding	1	false	0.185217036777224	ENSG00000114982	55683	4.0	1	0.706112460230049	0	false	0	ENSG00000114982	6975
668.680151759681	10.0	0.01738674882608205	0.1	0.0	19	2	MOB1B	protein_coding	1	false	-0.0884863695927227	ENSG00000173542	92597	2.5	1	0.920196817294138	0	false	0	ENSG00000173542	58577
2493.31701290546	10.5	0.01463316177212635	0.09523809523809523	0.0	20	2	MOB1A	protein_coding	1	false	0.240385555368801	ENSG00000114978	55233	2.0	1	0.588982743232589	0	false	0	ENSG00000114978	49300
74.0146811655211	10.0	0.006361418318462716	0.1	0.0	19	2	VIPR1	protein_coding	1	false	-0.231416350787359	ENSG00000114812	7433	4.5	1	0.873801785810138	0	false	0	ENSG00000114812	21432
560.174313844481	6.0	0.08228793788178304	0.16666666666666666	0.0	11	3	MAPKAPK3	protein_coding	2	false	0.425632454599191	ENSG00000114738	7867	2.6666666666666665	1	0.356835754756598	0	false	0	ENSG00000114738	277233
7.47630068559458	33.5	0.025329913981941548	0.029850746268656716	0.0	66	2	ETV5	protein_coding	1	false	1.20818990378274	ENSG00000244405	2119	2.5	1	0.56985029052637	0	false	0	ENSG00000244405	85338
228.566204863265	34.0	0.013503172991873104	0.029411764705882353	0.0	67	2	CISH	protein_coding	1	false	0.526083051771921	ENSG00000114737	1154	1.5	1	0.421769400102888	0	false	0	ENSG00000114737	45493
188.199827289633	2.0	5.44959128065395E-4	0.5	0.0	3	2	LDLR	protein_coding	1	false	0.657809950565007	ENSG00000130164	3949	94.5	1	0.334171147717186	0	false	0	ENSG00000130164	1836
71.851045061721	2.5	0.0	0.4	0.0	4	1	CFAP92	protein_coding	0	false	2.02174017552067	ENSG00000114656	57501	2.0	1	0.0318008970815074	0	false	0	ENSG00000114656	0
165.350296543388	1.5	0.0020967272770446355	0.6666666666666666	0.0	2	3	NCBP2	protein_coding	2	false	-0.386922656440242	ENSG00000114503	22916	2.3333333333333335	1	0.397490558344959	0	false	0	ENSG00000114503	7064
627.091957497928	4.0	0.007465287053362065	0.25	0.0	7	3	FXR1	protein_coding	2	false	-0.3193229160232	ENSG00000114416	8087	5.0	1	0.416400182339546	0	false	0	ENSG00000114416	25151
7.70620813156111	16.0	0.0055852374252758925	0.0625	0.0	31	2	LAMB3	protein_coding	1	false	0.187679629176504	ENSG00000196878	3914	4.0	1	0.947745826819558	0	false	0	ENSG00000196878	18817
28.4416184462805	16.5	0.0	0.06060606060606061	0.0	32	1	COL7A1	protein_coding	0	false	2.10057143762291	ENSG00000114270	1294	2.0	1	0.00703488925321719	0	false	0	ENSG00000114270	0
556.339136484016	4.0	0.0	0.25	0.0	7	1	PFKFB4	protein_coding	0	false	1.82289948802877	ENSG00000114268	5210	13.0	1	0.00266385118021486	0	false	0	ENSG00000114268	0
811.292466737607	2.0	0.0016179587184555928	0.5	0.0	3	2	UBE3A	protein_coding	1	false	-0.656184483175132	ENSG00000114062	7337	94.5	1	0.0950319375010861	0	false	0	ENSG00000114062	5451
88.5220667934922	5.5	0.2957026589018895	0.18181818181818182	0.0	10	2	PEDS1	protein_coding	1	false	0.0155745879947216	ENSG00000240849	387521	2.5	1	0.989328282695237	0	false	0	ENSG00000240849	996240
64.1995932118327	6.0	0.3233041263735285	0.16666666666666666	0.0	11	3	NIT2	protein_coding	2	false	-0.569858775040936	ENSG00000114021	56954	2.3333333333333335	1	0.339839398649925	0	false	0	ENSG00000114021	1089231
2622.66714738199	2.0	0.0	0.5	0.0	3	1	BCL6	protein_coding	0	false	2.49454708289025	ENSG00000113916	604	11.0	1	2.41220831884172E-6	0	false	0	ENSG00000113916	0
193.756890646781	4.5	0.011773016805874635	0.2222222222222222	0.0	8	3	TIMMDC1	protein_coding	2	false	-0.605520261694262	ENSG00000113845	51300	8.333333333333334	1	0.267819629570994	0	false	0	ENSG00000113845	39664
101.345873544282	3.5	0.0	0.2857142857142857	0.0	6	1	DBN1	protein_coding	0	false	1.59494314188986	ENSG00000113758	1627	13.0	1	0.0065437783879744	0	false	0	ENSG00000113758	0
887.235344714833	2.0	0.0	0.5	0.0	3	1	HRH2	protein_coding	0	false	2.05788595892943	ENSG00000113749	3274	2.0	1	2.93806419469688E-5	0	false	0	ENSG00000113749	0
795.533779511	4.5	0.01236902874985901	0.2222222222222222	0.0	8	2	ATP6V0E1	protein_coding	1	false	0.728943132922085	ENSG00000113732	8992	12.0	1	0.143724237259357	0	false	0	ENSG00000113732	41672
1457.09637628771	2.0	0.0	0.5	0.0	3	1	ERGIC1	protein_coding	0	false	1.42670533271325	ENSG00000113719	57222	188.0	1	0.0291858244702849	0	false	0	ENSG00000113719	0
684.351181223532	1.5	0.006766872658842525	0.6666666666666666	0.0	2	9	RBMX	protein_coding	8	false	-0.720743285395853	ENSG00000147274	27316	1.5555555555555556	1	0.0361050097267471	0	false	0	ENSG00000147274	22798
1802.35766566383	2.0	0.0	0.5	0.0	3	1	MACROH2A1	protein_coding	0	false	1.06180284979814	ENSG00000113648	9555	9.0	1	0.00792537822529999	0	false	0	ENSG00000113648	0
327.161113825918	2.0	0.0011843066018414632	0.5	0.0	3	2	TRIM23	protein_coding	1	false	0.316319333934965	ENSG00000113595	373	94.5	1	0.68301669570434	0	false	0	ENSG00000113595	3990
583.798036548189	2.0	0.0012279389503303591	0.5	0.0	3	2	PPP2CA	protein_coding	1	false	0.23140632465933	ENSG00000113575	5515	3.5	1	0.622402922367646	0	false	0	ENSG00000113575	4137
279.290246381033	6.5	0.0031308436181011912	0.15384615384615385	0.0	12	2	FAM172A	protein_coding	1	false	0.0361228087094216	ENSG00000113391	83989	4.0	1	0.954883554192872	0	false	0	ENSG00000113391	10548
814.424518341684	2.0	0.0	0.5	0.0	3	1	LMNB1	protein_coding	0	false	1.32139492942978	ENSG00000113368	4001	188.0	1	0.00757503137035598	0	false	0	ENSG00000113368	0
335.663210402337	13.5	0.13124788516678243	0.07407407407407407	0.0	26	2	PTPA	protein_coding	1	false	-0.604749171067584	ENSG00000119383	5524	2.5	1	0.371542728253464	0	false	0	ENSG00000119383	442182
303.359424300271	10.0	0.9492217413759327	0.1	0.0	19	3	UBL5	protein_coding	2	false	0.00890260419546283	ENSG00000198258	59286	2.3333333333333335	1	0.991720774976853	0	false	0	ENSG00000198258	3197985
509.21970327694	10.5	0.0	0.09523809523809523	0.0	20	1	CLK4	protein_coding	0	false	1.13735429009267	ENSG00000113240	57396	3.0	1	0.0154127653522838	0	false	0	ENSG00000113240	0
2785.85059379154	2.5	0.0	0.4	0.0	4	1	SPARC	protein_coding	0	false	1.30342726379737	ENSG00000113140	6678	5.0	1	0.0478782285371605	0	false	0	ENSG00000113140	0
246.63323070767	8.5	0.07726784325598238	0.11764705882352941	0.0	16	5	PDP1	protein_coding	4	false	-0.198706091199867	ENSG00000164951	54704	2.0	1	0.777200801107537	0	false	0	ENSG00000164951	260320
8.77196527673998	9.0	0.032228277323645166	0.1111111111111111	0.0	17	2	LOX	protein_coding	1	false	1.35025398045663	ENSG00000113083	4015	3.5	1	0.566075794090637	0	false	0	ENSG00000113083	108579
425.937596209746	2.0	0.0	0.5	0.0	3	1	BTN2A1	protein_coding	0	false	1.06173175723793	ENSG00000112763	11120	188.0	1	0.0295485600064457	0	false	0	ENSG00000112763	0
102.769100476618	11.0	0.0	0.09090909090909091	0.0	21	1	VEGFA	protein_coding	0	false	1.33834808280832	ENSG00000112715	7422	3.0	1	0.031460230297826	0	false	0	ENSG00000112715	0
955.320961307829	11.5	0.01663193887909387	0.08695652173913043	0.0	22	2	ELK4	protein_coding	1	false	-1.03832531852155	ENSG00000158711	2005	2.0	1	0.0133406349807305	0	false	0	ENSG00000158711	56034
196.314806080414	12.0	0.013421547850142176	0.08333333333333333	0.0	23	2	SRF	protein_coding	1	false	0.491460161880645	ENSG00000112658	6722	2.0	1	0.238390954570498	0	false	0	ENSG00000112658	45218
382.420205796529	9.5	0.0	0.10526315789473684	0.0	18	1	TFEB	protein_coding	0	false	1.02156180037348	ENSG00000112561	7942	2.0	1	0.0455241998678633	0	false	0	ENSG00000112561	0
132.47018396215	7.5	0.006428499344030679	0.13333333333333333	0.0	14	2	CUTA	protein_coding	1	false	-0.443532724931018	ENSG00000112514	51596	1.5	1	0.438050215946431	0	false	0	ENSG00000112514	21658
44.2484889232306	7.0	0.003225825601206271	0.14285714285714285	0.0	13	2	EPM2A	protein_coding	1	false	-0.0656608566770514	ENSG00000112425	7957	1.5	1	0.968977669582537	0	false	0	ENSG00000112425	10868
63.6324197587723	4.0	0.04047004208889126	0.25	0.0	7	3	TSPYL4	protein_coding	2	false	-0.16746064048449	ENSG00000187189	23270	2.0	1	0.764000217430851	0	false	0	ENSG00000187189	136346
921.059292326721	4.5	0.0	0.2222222222222222	0.0	8	1	TRIM38	protein_coding	0	false	1.00888761163482	ENSG00000112343	10475	3.0	1	0.0313149975665439	0	false	0	ENSG00000112343	0
75.545248043382	6.0	0.002073278599965569	0.16666666666666666	0.0	11	2	COX18	protein_coding	1	false	-0.204583293807042	ENSG00000163626	285521	2.0	1	0.718495763025562	0	false	0	ENSG00000163626	6985
38.9717522777904	5.0	0.0015306940214778009	0.2	0.0	9	2	E2F5	protein_coding	1	false	0.0213745916042556	ENSG00000133740	1875	2.0	1	0.987242447712385	0	false	0	ENSG00000133740	5157
404.007428150105	5.5	0.0	0.18181818181818182	0.0	10	1	E2F3	protein_coding	0	false	1.17585073232666	ENSG00000112242	1871	2.0	1	0.0173597857917845	0	false	0	ENSG00000112242	0
328.267213411129	15.0	0.0	0.06666666666666667	0.0	29	1	TREML2	protein_coding	0	false	1.35691220984082	ENSG00000112195	79865	2.0	1	0.0294365656693333	0	false	0	ENSG00000112195	0
49.5974348774136	8.5	0.041212682469294104	0.11764705882352941	0.0	16	2	SAYSD1	protein_coding	1	false	-0.235205860378014	ENSG00000112167	55776	2.0	1	0.821817058442998	0	false	0	ENSG00000112167	138848
7446.5285876344	13.0	0.008897140448671141	0.07692307692307693	0.0	25	2	FCGR3B	protein_coding	1	false	1.70079049236896	ENSG00000162747	2215	4.0	1	0.123605070066061	0	false	0	ENSG00000162747	29975
116.078201559864	13.5	0.004861890260191269	0.07407407407407407	0.0	26	2	CILK1	protein_coding	1	false	-0.262621629487982	ENSG00000112144	22858	1.5	1	0.51537340395239	0	false	0	ENSG00000112144	16380
47.3145389970316	6.5	0.29726986162312335	0.15384615384615385	0.0	12	3	POGLUT3	protein_coding	2	false	-0.53522203064507	ENSG00000178202	143888	2.3333333333333335	1	0.503261541225954	0	false	0	ENSG00000178202	1001520
12060.7736468622	7.0	0.008203475153306857	0.14285714285714285	0.0	13	2	SOD2	protein_coding	1	false	1.51396508649675	ENSG00000112096	6648	2.5	1	0.0208589260867621	0	false	0	ENSG00000112096	27638
2394.99855146194	3.5	0.0	0.2857142857142857	0.0	6	1	MAPK14	protein_coding	0	false	2.04303885919612	ENSG00000112062	1432	13.0	1	2.87227705652939E-5	0	false	0	ENSG00000112062	0
410.838859703417	1.0	1.6740574522270305E-4	1.0	0.0	1	2	NXF1	protein_coding	1	false	0.289786598442191	ENSG00000162231	10482	14.0	1	0.447239079727443	0	false	0	ENSG00000162231	564
134.642633385679	1.5	0.0	0.6666666666666666	0.0	2	1	SLC26A8	protein_coding	0	false	2.75891381155964	ENSG00000112053	116369	2.0	1	6.40873956139821E-4	0	false	0	ENSG00000112053	0
679.373021261322	21.0	0.006839296420960149	0.047619047619047616	0.0	41	2	MAP2K2	protein_coding	1	false	-0.509466977330238	ENSG00000126934	5605	5.0	1	0.429494403032426	0	false	0	ENSG00000126934	23042
8852.70795365331	21.5	0.0	0.046511627906976744	0.0	42	1	RIPOR2	protein_coding	0	false	1.21427187575266	ENSG00000111913	9750	2.0	1	0.0124857579679802	0	false	0	ENSG00000111913	0
1144.05746645335	2.0	0.0	0.5	0.0	3	1	NEDD9	protein_coding	0	false	1.46839797053471	ENSG00000111859	4739	188.0	1	0.0258895928596094	0	false	0	ENSG00000111859	0
400.209143131299	2.0	0.0	0.5	0.0	3	1	DSE	protein_coding	0	false	1.03709296538383	ENSG00000111817	29940	188.0	1	0.0291372281518451	0	false	0	ENSG00000111817	0
330.701638947631	1.5	0.0010418336271838435	0.6666666666666666	0.0	2	2	SRSF9	protein_coding	1	false	0.052877736833632	ENSG00000111786	8683	4.5	1	0.921116119671298	0	false	0	ENSG00000111786	3510
2143.7688074644	22.5	0.019629214083453545	0.044444444444444446	0.0	44	2	PTPN6	protein_coding	1	false	0.835771202597311	ENSG00000111679	5777	7.5	1	0.0662026413686025	0	false	0	ENSG00000111679	66132
1911.82251026066	2.0	9.198411426332567E-4	0.5	0.0	3	2	RAC2	protein_coding	1	false	0.603589948571173	ENSG00000128340	5880	2.5	1	0.202316068401558	0	false	0	ENSG00000128340	3099
257.820231967271	7.0	0.0	0.14285714285714285	0.0	13	1	LTBR	protein_coding	0	false	1.02140252230815	ENSG00000111321	4055	8.0	1	0.0287879018583939	0	false	0	ENSG00000111321	0
123.764339974494	5.5	0.0045116441974912885	0.18181818181818182	0.0	10	2	MILR1	protein_coding	1	false	1.3451164790853	ENSG00000271605	284021	2.0	1	0.0149484336740863	0	false	0	ENSG00000271605	15200
162.695005472548	6.0	0.0031539954764830546	0.16666666666666666	0.0	11	2	NAA25	protein_coding	1	false	-0.439331286164426	ENSG00000111300	80018	1.5	1	0.442123148679369	0	false	0	ENSG00000111300	10626
3689.29733560685	6.5	0.13199764919591814	0.15384615384615385	0.0	12	5	LRP10	protein_coding	4	false	0.118340090905523	ENSG00000197324	26020	2.2	1	0.89348746982696	0	false	0	ENSG00000197324	444708
267.053553488366	7.0	0.0	0.14285714285714285	0.0	13	1	MANSC1	protein_coding	0	false	2.39066023022431	ENSG00000111261	54682	5.0	1	0.0149888651387263	0	false	0	ENSG00000111261	0
115.728623500058	2.5	0.0	0.4	0.0	4	1	ACSS3	protein_coding	0	false	2.28988507580821	ENSG00000111058	79611	2.0	1	0.0287153277365042	0	false	0	ENSG00000111058	0
223.955181880549	2.5	0.005561195110802419	0.4	0.0	4	3	PIP4K2B	protein_coding	2	false	-0.0237243398980733	ENSG00000276293	8396	2.6666666666666665	1	0.972908436417769	0	false	0	ENSG00000276293	18736
425.397828288377	3.0	0.0	0.3333333333333333	0.0	5	1	LIN7A	protein_coding	0	false	1.80387812733869	ENSG00000111052	8825	3.0	1	0.0153824420058845	0	false	0	ENSG00000111052	0
203.435807249731	23.5	0.12726576552510194	0.0425531914893617	0.0	46	3	ATG4B	protein_coding	2	false	0.399706316490716	ENSG00000168397	23192	2.3333333333333335	1	0.404930613826822	0	false	0	ENSG00000168397	428766
779.776601339507	24.0	0.0	0.041666666666666664	0.0	47	1	CAMKK2	protein_coding	0	false	1.5488871396236	ENSG00000110931	10645	3.0	1	0.00193885957111863	0	false	0	ENSG00000110931	0
2325.2912374266	21.0	0.006632413789009397	0.047619047619047616	0.0	41	2	TNIP1	protein_coding	1	false	-0.678046683643978	ENSG00000145901	10318	5.0	1	0.273039683838708	0	false	0	ENSG00000145901	22345
1756.89950980085	21.5	0.0	0.046511627906976744	0.0	42	1	SELPLG	protein_coding	0	false	1.17882682299947	ENSG00000110876	6404	2.0	1	0.0096033494006947	0	false	0	ENSG00000110876	0
577.098976536963	4.5	0.020468617359144688	0.2222222222222222	0.0	8	3	CLEC2B	protein_coding	2	false	1.15681827065977	ENSG00000110852	9976	9.0	1	0.0479921555530192	0	false	0	ENSG00000110852	68960
225.254863574209	4.0	0.0011261301371896018	0.25	0.0	7	2	SOCS4	protein_coding	1	false	-0.00441237010432763	ENSG00000180008	122809	1.5	1	0.995439511953451	0	false	0	ENSG00000180008	3794
150.207864672386	4.5	0.0	0.2222222222222222	0.0	8	1	VWF	protein_coding	0	false	1.86855149930002	ENSG00000110799	7450	2.0	1	0.00470537528242236	0	false	0	ENSG00000110799	0
1564.67930005781	4.5	0.02626251832855455	0.2222222222222222	0.0	8	2	TCIRG1	protein_coding	1	false	0.990724548509516	ENSG00000110719	10312	12.0	1	0.00660749655297588	0	false	0	ENSG00000110719	88480
74.6409491773239	15.0	0.0	0.06666666666666667	0.0	29	1	SLC22A18	protein_coding	0	false	1.46137102737704	ENSG00000110628	5002	2.0	1	0.0493652329667423	0	false	0	ENSG00000110628	0
1495.26167089614	2.0	0.0	0.5	0.0	3	1	CBL	protein_coding	0	false	1.12634161612561	ENSG00000110395	867	188.0	1	0.00272641560510139	0	false	0	ENSG00000110395	0
8.20212099237449	3.0	0.039711373498839436	0.3333333333333333	0.0	5	4	SPOUT1	protein_coding	3	false	0.950775054833378	ENSG00000198917	51490	5.25	1	0.590826541072705	0	false	0	ENSG00000198917	133790
3368.30533949856	3.5	0.0061530515930259475	0.2857142857142857	0.0	6	3	EIF4G2	protein_coding	2	false	0.379948758227792	ENSG00000110321	1982	2.0	1	0.28828678294381	0	false	0	ENSG00000110321	20730
41.9396234891099	21.5	0.006669516126159819	0.046511627906976744	0.0	42	2	TRIM68	protein_coding	1	false	-0.164250428347146	ENSG00000167333	55128	4.0	1	0.897587194347734	0	false	0	ENSG00000167333	22470
241.809864189696	22.0	0.0	0.045454545454545456	0.0	43	1	FOLR3	protein_coding	0	false	2.76180914652348	ENSG00000110203	2352	2.0	1	0.00434361835221257	0	false	0	ENSG00000110203	0
113.273033283737	10.0	0.003005882946578571	0.1	0.0	19	2	BTN2A2	protein_coding	1	false	0.420635542723842	ENSG00000124508	10385	1.5	1	0.481989128255096	0	false	0	ENSG00000124508	10127
177.786783571459	10.5	0.0	0.09523809523809523	0.0	20	1	ST3GAL4	protein_coding	0	false	1.64725325845544	ENSG00000110080	6484	2.0	1	0.00156060743074676	0	false	0	ENSG00000110080	0
700.376018569321	5.0	0.0014184965539349255	0.2	0.0	9	2	CHP1	protein_coding	1	false	-0.189371875808906	ENSG00000187446	11261	2.5	1	0.810842146802516	0	false	0	ENSG00000187446	4779
83.3307756372884	5.5	0.0	0.18181818181818182	0.0	10	1	MS4A4A	protein_coding	0	false	2.44984977606933	ENSG00000110079	51338	2.0	1	1.95247386269269E-4	0	false	0	ENSG00000110079	0
414.477707221708	8.5	0.005594438804889197	0.11764705882352941	0.0	16	2	CCNL2	protein_coding	1	false	0.262939056367166	ENSG00000221978	81669	3.0	1	0.526136944282633	0	false	0	ENSG00000221978	18848
1330.11432779148	9.0	0.003274800686244828	0.1111111111111111	0.0	17	2	EHD1	protein_coding	1	false	0.621669447543434	ENSG00000110047	10938	1.5	1	0.232206896397896	0	false	0	ENSG00000110047	11033
140.502761858335	2.5	0.0	0.4	0.0	4	1	SIAE	protein_coding	0	false	1.4186726654898	ENSG00000110013	54414	8.0	1	0.0383603965062519	0	false	0	ENSG00000110013	0
541.597585776189	7.0	0.0	0.14285714285714285	0.0	13	1	ZBTB16	protein_coding	0	false	2.47001744865505	ENSG00000109906	7704	8.0	1	0.0103633599719325	0	false	0	ENSG00000109906	0
149.468823384615	14.0	0.004207405032857829	0.07142857142857142	0.0	27	2	PPCS	protein_coding	1	false	0.222620811404109	ENSG00000127125	79717	2.5	1	0.767650204041135	0	false	0	ENSG00000127125	14175
485.090766553592	14.5	0.0	0.06896551724137931	0.0	28	1	BST1	protein_coding	0	false	1.45715256176511	ENSG00000109743	683	2.0	1	0.00668135809514123	0	false	0	ENSG00000109743	0
2066.31660093391	2.0	0.001052519100283165	0.5	0.0	3	2	FBXW7	protein_coding	1	false	-1.77650992692406	ENSG00000109670	55294	94.5	1	0.00151499947069757	0	false	0	ENSG00000109670	3546
97.9968643991549	8.5	0.010604738413682153	0.11764705882352941	0.0	16	2	SLC25A28	protein_coding	1	false	0.335516699156744	ENSG00000155287	81894	2.0	1	0.519817309162475	0	false	0	ENSG00000155287	35728
35.3027409228532	9.0	0.008633565445554546	0.1111111111111111	0.0	17	2	SLC2A9	protein_coding	1	false	0.447755066044532	ENSG00000109667	56606	2.0	1	0.735733950260613	0	false	0	ENSG00000109667	29087
144.915362640957	5.0	0.0050889565635518505	0.2	0.0	9	3	NACC1	protein_coding	2	false	0.43632586890344	ENSG00000160877	112939	2.3333333333333335	1	0.248675686720324	0	false	0	ENSG00000160877	17145
779.711348603568	5.5	0.0	0.18181818181818182	0.0	10	1	KLHL2	protein_coding	0	false	2.00383258672385	ENSG00000109466	11275	3.0	1	2.97808321580491E-4	0	false	0	ENSG00000109466	0
247.718739913035	3.5	0.10238998414988157	0.2857142857142857	0.0	6	4	ZNF143	protein_coding	3	false	0.194342110731377	ENSG00000166478	7702	2.0	1	0.667349195666402	0	false	0	ENSG00000166478	344958
633.040164797593	4.0	0.0	0.25	0.0	7	1	PHF12	protein_coding	0	false	1.0907778004576	ENSG00000109118	57649	4.0	1	0.00434361835221257	0	false	0	ENSG00000109118	0
4047.92082017658	2.5	6.126337910277644E-4	0.4	0.0	4	2	ARHGDIB	protein_coding	1	false	0.327047876074354	ENSG00000111348	397	1.5	1	0.590253309712933	0	false	0	ENSG00000111348	2064
1293.84458283395	3.0	0.0	0.3333333333333333	0.0	5	1	WSB1	protein_coding	0	false	1.09066260406212	ENSG00000109046	26118	2.0	1	7.12199293640926E-4	0	false	0	ENSG00000109046	0
38.8722480436945	29.0	0.40560809246496055	0.034482758620689655	0.0	57	3	CDCA4	protein_coding	2	false	-0.428849693858393	ENSG00000170779	55038	2.6666666666666665	1	0.663779030845304	0	false	0	ENSG00000170779	1366518
403.521383909945	29.5	0.0	0.03389830508474576	0.0	58	1	MAP2K6	protein_coding	0	false	1.56387150185505	ENSG00000108984	5608	3.0	1	0.00132131388953612	0	false	0	ENSG00000108984	0
365.06836760225	1.0	4.897508503855675E-4	1.0	0.0	1	2	EFTUD2	protein_coding	1	false	0.0124660281671402	ENSG00000108883	9343	14.0	1	0.982000929161852	0	false	0	ENSG00000108883	1650
22.9187877523451	4.5	0.04366796673256042	0.2222222222222222	0.0	8	3	POLR2J3	protein_coding	2	false	0.183801264509407	ENSG00000285437	548644	2.6666666666666665	1	0.889008346053322	0	false	0	ENSG00000285437	147120
273.462612118164	5.0	0.0	0.2	0.0	9	1	DUSP3	protein_coding	0	false	1.04434631753344	ENSG00000108861	1845	3.0	1	0.0126784930227151	0	false	0	ENSG00000108861	0
374.548995629039	12.0	0.0	0.08333333333333333	0.0	23	1	ABCC3	protein_coding	0	false	1.6773916982399	ENSG00000108846	8714	2.0	1	0.007981374011699	0	false	0	ENSG00000108846	0
114.756421140181	2.0	4.5235169453794233E-4	0.5	0.0	3	2	FASN	protein_coding	1	false	-0.407158288800953	ENSG00000169710	2194	94.5	1	0.58946048285907	0	false	0	ENSG00000169710	1524
180.792474593772	2.5	0.0	0.4	0.0	4	1	ALOX12	protein_coding	0	false	1.66182056191099	ENSG00000108839	239	2.0	1	0.0126154454527711	0	false	0	ENSG00000108839	0
113.569218452553	8.5	0.06437878814862305	0.11764705882352941	0.0	16	3	TMEM222	protein_coding	2	false	-0.146297704025027	ENSG00000186501	84065	3.0	1	0.86660427466204	0	false	0	ENSG00000186501	216896
19.5042339632635	9.0	0.0036532445251791297	0.1111111111111111	0.0	17	2	PEX12	protein_coding	1	false	0.557886315412567	ENSG00000108733	5193	2.0	1	0.607397234963988	0	false	0	ENSG00000108733	12308
2284.29094160401	2.0	0.0	0.5	0.0	3	1	CPD	protein_coding	0	false	1.32904481200271	ENSG00000108582	1362	188.0	1	0.0194880849493955	0	false	0	ENSG00000108582	0
152.955009465234	3.5	8.957988281597834E-4	0.2857142857142857	0.0	6	2	SYVN1	protein_coding	1	false	-0.123950315194896	ENSG00000162298	84447	2.0	1	0.84890063798253	0	false	0	ENSG00000162298	3018
40.4678072834033	4.0	0.0	0.25	0.0	7	1	SLC6A4	protein_coding	0	false	1.865930043207	ENSG00000108576	6532	2.0	1	0.0309061177480832	0	false	0	ENSG00000108576	0
317.411319181262	14.5	0.004487898701715018	0.06896551724137931	0.0	28	2	RNF167	protein_coding	1	false	0.483528206095712	ENSG00000108523	26001	3.5	1	0.236665763221503	0	false	0	ENSG00000108523	15120
106.961036816538	6.5	0.0017809121832202453	0.15384615384615385	0.0	12	2	GOLPH3L	protein_coding	1	false	0.0133550419660365	ENSG00000143457	55204	1.5	1	0.987701851379132	0	false	0	ENSG00000143457	6000
370.369552979251	7.0	0.0	0.14285714285714285	0.0	13	1	P2RX1	protein_coding	0	false	1.44342855681107	ENSG00000108405	5023	2.0	1	0.00417086944169888	0	false	0	ENSG00000108405	0
33.0904497085514	3.0	0.0018209827073427008	0.3333333333333333	0.0	5	2	MCRIP2	protein_coding	1	false	-0.301946399925508	ENSG00000172366	84331	2.5	1	0.798097260906774	0	false	0	ENSG00000172366	6135
1192.08026732186	3.5	0.0012982849815675588	0.2857142857142857	0.0	6	2	CASC3	protein_coding	1	false	-0.389395260262351	ENSG00000108349	22794	2.0	1	0.594421567896977	0	false	0	ENSG00000108349	4374
28.8046301102936	4.5	0.003754162882228277	0.2222222222222222	0.0	8	2	PBLD	protein_coding	1	false	0.0887520986198792	ENSG00000108187	64081	1.5	1	0.927567365731374	0	false	0	ENSG00000108187	12648
361.50089757188	2.0	0.2037577247065947	0.5	0.0	3	6	ZNF770	protein_coding	5	false	-0.0485836748595108	ENSG00000198146	54989	5.166666666666667	1	0.948841442675217	0	false	0	ENSG00000198146	686472
493.163046738288	2.0	0.0012225962137806985	0.5	0.0	3	2	SMC3	protein_coding	1	false	-0.447284703108584	ENSG00000108055	9126	94.5	1	0.166167040349466	0	false	0	ENSG00000108055	4119
13.5327858268651	11.0	0.024521379850759556	0.09090909090909091	0.0	21	2	GDPGP1	protein_coding	1	false	0.457161605304126	ENSG00000183208	390637	2.0	1	0.7719298729104	0	false	0	ENSG00000183208	82614
115.023886801092	11.5	0.022469769015689835	0.08695652173913043	0.0	22	2	LHPP	protein_coding	1	false	-0.781806723081723	ENSG00000107902	64077	2.0	1	0.389053595432075	0	false	0	ENSG00000107902	75702
100.339291120179	2.0	0.0	0.5	0.0	3	1	CPEB3	protein_coding	0	false	1.35711579595825	ENSG00000107864	22849	188.0	1	0.0307239829488223	0	false	0	ENSG00000107864	0
230.360188395497	9.0	0.015712988192552225	0.1111111111111111	0.0	17	2	MICU2	protein_coding	1	false	-0.45580802335382	ENSG00000165487	221154	2.0	1	0.323278789858089	0	false	0	ENSG00000165487	52938
352.060294340617	9.5	0.014019340706309771	0.10526315789473684	0.0	18	2	MICU1	protein_coding	1	false	0.758145154159928	ENSG00000107745	10367	2.0	1	0.0398674748605757	0	false	0	ENSG00000107745	47232
4538.24701410544	22.5	0.0	0.044444444444444446	0.0	44	1	VSIR	protein_coding	0	false	1.15465980638676	ENSG00000107738	64115	14.0	1	0.0244891234798127	0	false	0	ENSG00000107738	0
197.656899733901	3.0	0.0	0.3333333333333333	0.0	5	1	CDH23	protein_coding	0	false	1.40170877495972	ENSG00000107736	64072	7.0	1	0.045870134609386	0	false	0	ENSG00000107736	0
232.557153391529	4.5	0.01150944180275804	0.2222222222222222	0.0	8	2	ERLIN1	protein_coding	1	false	2.15178487378691	ENSG00000107566	10613	12.0	1	0.00193885957111863	0	false	0	ENSG00000107566	38776
36.783310942686	15.0	1.2233581473764195	0.06666666666666667	0.0	29	3	SUPT4H1	protein_coding	2	false	0.418792784119401	ENSG00000213246	6827	2.3333333333333335	1	0.628751947679564	0	false	0	ENSG00000213246	4121567
920.53527274116	2.0	0.0011175223949707038	0.5	0.0	3	2	DDX58	protein_coding	1	false	1.65553103409112	ENSG00000107201	23586	94.5	1	0.0449413713887144	0	false	0	ENSG00000107201	3765
140.739329418194	10.0	0.0787563890224573	0.1	0.0	19	3	SNX9	protein_coding	2	false	0.208230180129264	ENSG00000130340	51429	1.6666666666666667	1	0.804215383163196	0	false	0	ENSG00000130340	265335
18.8516449608474	10.5	0.0	0.09523809523809523	0.0	20	1	DNM1	protein_coding	0	false	2.57893330315876	ENSG00000106976	1759	3.0	1	0.0199089240218491	0	false	0	ENSG00000106976	0
55.8614816630422	4.5	0.001142158346838584	0.2222222222222222	0.0	8	2	TCAF2	protein_coding	1	false	0.278763846339545	ENSG00000170379	285966	1.5	1	0.701895700428444	0	false	0	ENSG00000170379	3848
3162.64968272187	5.0	0.0	0.2	0.0	9	1	MEGF9	protein_coding	0	false	1.46947988693212	ENSG00000106780	1955	2.0	1	0.00576667533196827	0	false	0	ENSG00000106780	0
56.5405706358166	32.5	0.09511495788142686	0.03076923076923077	0.0	64	4	ENTR1	protein_coding	3	false	-0.426435507364558	ENSG00000165689	10807	2.75	1	0.648841166661065	0	false	0	ENSG00000165689	320448
193.281631779241	33.0	0.02398146664054662	0.030303030303030304	0.0	65	2	PRKAG2	protein_coding	1	false	0.158879847319734	ENSG00000106617	51422	2.5	1	0.828091583713643	0	false	0	ENSG00000106617	80795
527.357788830231	7.0	0.7067799326815194	0.14285714285714285	0.0	13	4	TMEM248	protein_coding	3	false	-0.206416558757852	ENSG00000106609	55069	2.25	1	0.624192238899154	0	false	0	ENSG00000106609	2381184
42.1839013718769	6.5	0.0471763637335043	0.15384615384615385	0.0	12	5	IGLL5	protein_coding	4	false	0.248870852459293	ENSG00000254709	100423062	2.4	1	0.916486612357111	0	false	0	ENSG00000254709	158940
69.102455026773	7.0	0.006876101939413367	0.14285714285714285	0.0	13	2	TMEM176B	protein_coding	1	false	0.302313853033713	ENSG00000106565	28959	3.0	1	0.882430326025109	0	false	0	ENSG00000106565	23166
13.6067560441537	13.0	0.010128938042065145	0.07692307692307693	0.0	25	3	SLC25A32	protein_coding	2	false	-0.539825608837071	ENSG00000164933	81034	2.3333333333333335	1	0.687184258555437	0	false	0	ENSG00000164933	34125
917.168959597856	13.5	0.0	0.07407407407407407	0.0	26	1	IMPDH1	protein_coding	0	false	1.07042179095286	ENSG00000106348	3614	3.0	1	0.0293159206845421	0	false	0	ENSG00000106348	0
328.101309861401	4.5	0.019188735136803737	0.2222222222222222	0.0	8	3	TSN	protein_coding	2	false	-0.729721996352982	ENSG00000211460	7247	2.0	1	0.0248797358530894	0	false	0	ENSG00000211460	64648
23.3603386417979	5.0	0.005543089170273014	0.2	0.0	9	2	MOSPD3	protein_coding	1	false	0.433887957348487	ENSG00000106330	64598	2.5	1	0.646311051674203	0	false	0	ENSG00000106330	18675
280.64224890949	9.5	0.006624993321579313	0.10526315789473684	0.0	18	2	ZWILCH	protein_coding	1	false	-2.00670464363154	ENSG00000174442	55055	2.0	1	0.0114266479964035	0	false	0	ENSG00000174442	22320
56.2770821951826	10.0	0.0043424575400853645	0.1	0.0	19	2	SNX8	protein_coding	1	false	0.378545347413968	ENSG00000106266	29886	1.5	1	0.682968579241151	0	false	0	ENSG00000106266	14630
254.916091958576	29.5	0.39580120270936103	0.03389830508474576	0.0	58	5	PPP2R2D	protein_coding	4	false	-0.288189415536587	ENSG00000175470	55844	1.8	1	0.503369549270199	0	false	0	ENSG00000175470	1333478
522.273205760487	30.0	0.0	0.03333333333333333	0.0	59	1	GRB10	protein_coding	0	false	3.33713096753345	ENSG00000106070	2887	5.0	1	4.37871719169536E-5	0	false	0	ENSG00000106070	0
210.631194870717	7.5	0.08561497865873567	0.13333333333333333	0.0	14	3	HEXA	protein_coding	2	false	-0.247564275589076	ENSG00000213614	3073	2.3333333333333335	1	0.636180135415161	0	false	0	ENSG00000213614	288442
66.6464534356299	8.0	0.08645438193442681	0.1250	0.0	15	4	HIBADH	protein_coding	3	false	-0.714102662993472	ENSG00000106049	11112	2.5	1	0.226779924401002	0	false	0	ENSG00000106049	291270
17.5415569992698	5.0	0.007108510979323609	0.2	0.0	9	2	SLC35G1	protein_coding	1	false	-0.059808023633897	ENSG00000176273	159371	3.5	1	0.963689303874814	0	false	0	ENSG00000176273	23949
152.230468929997	5.5	0.006521106777558131	0.18181818181818182	0.0	10	2	BRAT1	protein_coding	1	false	-0.110783530973845	ENSG00000106009	221927	2.0	1	0.890452955987042	0	false	0	ENSG00000106009	21970
44.7665014903185	9.5	0.02600844152374846	0.10526315789473684	0.0	18	3	CAV2	protein_coding	2	false	0.240977481083913	ENSG00000105971	858	2.0	1	0.894087793919199	0	false	0	ENSG00000105971	87624
36.7975962704402	8.5	0.004943812220619401	0.11764705882352941	0.0	16	2	SMCO4	protein_coding	1	false	1.00907568700943	ENSG00000166002	56935	2.5	1	0.251511990947172	0	false	0	ENSG00000166002	16656
286.717127466041	9.0	0.0029266323544252697	0.1111111111111111	0.0	17	2	TFEC	protein_coding	1	false	0.681243027142156	ENSG00000105967	22797	1.5	1	0.357972138247568	0	false	0	ENSG00000105967	9860
9.72040525102704	1.0	4.980617739072619E-4	1.0	0.0	1	2	STEAP1B	protein_coding	1	false	-0.491164579151636	ENSG00000105889		14.0	1	0.814179137584571	0	false	0	ENSG00000105889	1678
385.24675002878	2.0	0.001219924845505868	0.5	0.0	3	2	CDK6	protein_coding	1	false	-0.29584352655728	ENSG00000105810	1021	94.5	1	0.594048412074826	0	false	0	ENSG00000105810	4110
66.0863444353377	9.5	0.0	0.10526315789473684	0.0	18	1	SCN1B	protein_coding	0	false	2.33249418955117	ENSG00000105711	6324	3.0	1	5.63484813669505E-5	0	false	0	ENSG00000105711	0
318.79453260626	6.5	0.0	0.15384615384615385	0.0	12	1	ELL	protein_coding	0	false	1.09119695458663	ENSG00000105656	8178	7.0	1	0.0133879210798901	0	false	0	ENSG00000105656	0
1608.6686392588	19.5	0.0	0.05128205128205128	0.0	38	1	JAK3	protein_coding	0	false	1.17500098495755	ENSG00000105639	3718	7.0	1	3.15048977869075E-4	0	false	0	ENSG00000105639	0
40.8802030164211	7.5	0.11418377826456043	0.13333333333333333	0.0	14	4	MARS2	protein_coding	3	false	-0.848079500942002	ENSG00000247626	92935	2.25	1	0.209476855749627	0	false	0	ENSG00000247626	384692
66.3176759417827	8.0	0.01227048494238749	0.1250	0.0	15	2	GCDH	protein_coding	1	false	-0.360327168182658	ENSG00000105607	2639	3.0	1	0.518545853169234	0	false	0	ENSG00000105607	41340
107.153082123388	2.5	0.0024006696229808906	0.4	0.0	4	3	C11orf54	protein_coding	2	false	0.679379462801265	ENSG00000182919	28970	2.6666666666666665	1	0.300820430121487	0	false	0	ENSG00000182919	8088
53.11907581766	6.0	0.002997275204359673	0.16666666666666666	0.0	11	2	TMEM205	protein_coding	1	false	0.0473648566780293	ENSG00000105518	374882	2.0	1	0.975225582946738	0	false	0	ENSG00000105518	10098
108.209088996497	5.5	0.0532641152131455	0.18181818181818182	0.0	10	4	RABIF	protein_coding	3	false	0.063755392858027	ENSG00000183155	5877	1.75	1	0.92793969088805	0	false	0	ENSG00000183155	179450
1018.11678969683	6.0	0.0	0.16666666666666666	0.0	11	1	RAB3D	protein_coding	0	false	1.18868212750286	ENSG00000105514	9545	4.0	1	0.0185685139278219	0	false	0	ENSG00000105514	0
8.38461198561531	10.5	0.007865695475889417	0.09523809523809523	0.0	20	2	ACOT11	protein_coding	1	false	0.511465793527698	ENSG00000162390	26027	2.0	1	0.788025643310115	0	false	0	ENSG00000162390	26500
44.2377840011628	11.0	0.005466509946394543	0.09090909090909091	0.0	21	2	CABP5	protein_coding	1	false	0.651758948426588	ENSG00000105507	56344	2.0	1	0.505845401721783	0	false	0	ENSG00000105507	18417
381.797390601558	2.0	0.0	0.5	0.0	3	1	PLIN3	protein_coding	0	false	1.27348239714405	ENSG00000105355	10226	188.0	1	0.00203416147618522	0	false	0	ENSG00000105355	0
64.6067898569598	13.5	0.00343419232664304	0.07407407407407407	0.0	26	2	CBR1	protein_coding	1	false	0.136244172302614	ENSG00000159228	873	2.0	1	0.841985196431843	0	false	0	ENSG00000159228	11570
2439.76815284409	14.0	0.0	0.07142857142857142	0.0	27	1	DENND3	protein_coding	0	false	1.67414541565684	ENSG00000105339	22898	2.0	1	4.17434143028478E-4	0	false	0	ENSG00000105339	0
16.1913327494157	2.0	3.9447204858328435E-4	0.5	0.0	3	2	MYPOP	protein_coding	1	false	-0.244504050932556	ENSG00000176182	339344	5.0	1	0.850134360203851	0	false	0	ENSG00000176182	1329
83.8278218485278	2.5	0.0	0.4	0.0	4	1	BBC3	protein_coding	0	false	1.58552908047036	ENSG00000105327	27113	2.0	1	0.026161293757474	0	false	0	ENSG00000105327	0
831.974395487007	10.5	0.005075599722177699	0.09523809523809523	0.0	20	2	AKT2	protein_coding	1	false	-0.831527700046149	ENSG00000105221	208	4.0	1	0.17021668807009	0	false	0	ENSG00000105221	17100
2167.25650814069	15.0	0.02372293755528248	0.06666666666666667	0.0	29	2	STAT6	protein_coding	1	false	0.124051662389329	ENSG00000166888	6778	2.5	1	0.830943636775358	0	false	0	ENSG00000166888	79924
52.6986983832556	15.5	0.02062296308169044	0.06451612903225806	0.0	30	2	FCER2	protein_coding	1	false	-0.916905040696367	ENSG00000104921	2208	2.0	1	0.436433966856259	0	false	0	ENSG00000104921	69480
222.563077416105	11.5	0.002860144966251714	0.08695652173913043	0.0	22	2	ZNF664	protein_coding	1	false	0.322518541858578	ENSG00000179195	144348	1.5	1	0.506023994961389	0	false	0	ENSG00000179195	9636
77.2157546971961	12.0	0.0	0.08333333333333333	0.0	23	1	RETN	protein_coding	0	false	2.98441363686595	ENSG00000104918	56729	2.0	1	0.00195615610249358	0	false	0	ENSG00000104918	0
10641.9863417302	12.0	0.024781393029509713	0.08333333333333333	0.0	23	2	PPBP	protein_coding	1	false	0.233199707747223	ENSG00000163736	5473	2.5	1	0.846363771358211	0	false	0	ENSG00000163736	83490
116.758989514535	12.5	0.022752934052821853	0.08	0.0	24	2	PLEKHJ1	protein_coding	1	false	0.127405660204124	ENSG00000104886	55111	2.0	1	0.835529443331262	0	false	0	ENSG00000104886	76656
27.8124861386818	13.0	0.00839996913085549	0.07692307692307693	0.0	25	2	NKIRAS1	protein_coding	1	false	0.473148724542147	ENSG00000197885	28512	2.0	1	0.638205204951762	0	false	0	ENSG00000197885	28300
81.1058691487594	13.5	0.005386665716846835	0.07407407407407407	0.0	26	2	NFKBIB	protein_coding	1	false	0.191358732008777	ENSG00000104825	4793	1.5	1	0.712018014214047	0	false	0	ENSG00000104825	18148
33.2816501460017	9.5	0.9209061281188224	0.10526315789473684	0.0	18	4	WASHC1	protein_coding	3	false	0.53491821285487	ENSG00000181404	100287171	2.0	1	0.708444145902564	0	false	0	ENSG00000181404	3102588
124.828361694802	10.0	0.00820555288418728	0.1	0.0	19	2	GYS1	protein_coding	1	false	0.168745280510418	ENSG00000104812	2997	2.5	1	0.776488179469239	0	false	0	ENSG00000104812	27645
74.1990655775829	14.5	0.004753848254409242	0.06896551724137931	0.0	28	2	KCNN4	protein_coding	1	false	0.220711291381189	ENSG00000104783	3783	3.5	1	0.835402377756392	0	false	0	ENSG00000104783	16016
20.0995302906682	5.0	0.004183362718384356	0.2	0.0	9	2	UBXN8	protein_coding	1	false	-0.652130305971576	ENSG00000104691	7993	3.0	1	0.680651612913337	0	false	0	ENSG00000104691	14094
477.695533400492	4.0	0.0034095563747751595	0.25	0.0	7	2	IKBKB	protein_coding	1	false	0.208567681517424	ENSG00000104365	3551	7.0	1	0.684560802337157	0	false	0	ENSG00000104365	11487
139.759980445439	11.0	0.0026615732578226564	0.09090909090909091	0.0	21	2	PIP5K1C	protein_coding	1	false	0.186447732516837	ENSG00000186111	23396	1.5	1	0.729430043794273	0	false	0	ENSG00000186111	8967
94.6227243393265	11.5	0.0	0.08695652173913043	0.0	22	1	LAPTM4B	protein_coding	0	false	1.8643706788663	ENSG00000104341	55353	2.0	1	0.0219355902919745	0	false	0	ENSG00000104341	0
47.5646147380486	26.0	0.8964880411746896	0.038461538461538464	0.0	51	6	SAMD1	protein_coding	5	false	0.0727459280671493	ENSG00000141858	90378	2.0	1	0.948953908131079	0	false	0	ENSG00000141858	3020322
158.949162209763	26.5	0.023630330121755028	0.03773584905660377	0.0	52	2	TRIM35	protein_coding	1	false	-0.0949109100498035	ENSG00000104228	23087	3.5	1	0.869711497907776	0	false	0	ENSG00000104228	79612
419.869475389293	23.0	0.0	0.043478260869565216	0.0	45	1	ATP8B4	protein_coding	0	false	1.27115577897917	ENSG00000104043	79895	2.0	1	0.0279954311614333	0	false	0	ENSG00000104043	0
10.2576091342472	7.0	0.001628347372857711	0.14285714285714285	0.0	13	2	RYR1	protein_coding	1	false	-0.104886384641579	ENSG00000196218	6261	2.0	1	0.969094110511987	0	false	0	ENSG00000196218	5486
80.9124324521027	7.5	0.0	0.13333333333333333	0.0	14	1	HOMER2	protein_coding	0	false	1.55667637147423	ENSG00000103942	9455	2.0	1	0.019281240681203	0	false	0	ENSG00000103942	0
874.684068145846	1.5	3.555887992496423E-4	0.6666666666666666	0.0	2	2	CSK	protein_coding	1	false	0.49325459153285	ENSG00000103653	1445	4.5	1	0.292946594380052	0	false	0	ENSG00000103653	1198
46.9508969685575	20.5	0.2048049010703282	0.04878048780487805	0.0	40	9	TNF	protein_coding	8	false	0.160049774187841	ENSG00000232810	7124	2.0	1	0.891858792501076	0	false	0	ENSG00000232810	690000
187.993956738651	21.0	0.02054222839605112	0.047619047619047616	0.0	41	2	LACTB	protein_coding	1	false	0.42642720905053	ENSG00000103642	114294	5.0	1	0.414154946736039	0	false	0	ENSG00000103642	69208
27.2973116513207	9.0	0.08429205772530023	0.1111111111111111	0.0	17	3	CCDC167	protein_coding	2	false	-0.0496914250278811	ENSG00000198937	154467	2.0	1	0.971380676752872	0	false	0	ENSG00000198937	283985
4185.63758114781	9.5	0.02249826361062136	0.10526315789473684	0.0	18	2	AQP9	protein_coding	1	false	2.02969081486016	ENSG00000103569	366	4.5	1	0.0127781990680118	0	false	0	ENSG00000103569	75798
181.874332294873	4.5	0.08776810148824894	0.2222222222222222	0.0	8	7	STX4	protein_coding	6	false	0.405429852016496	ENSG00000103496	6810	4.285714285714286	1	0.267819629570994	0	false	0	ENSG00000103496	295696
278.258008015392	18.5	0.011241117700486188	0.05405405405405406	0.0	36	2	PYCARD	protein_coding	1	false	0.546624019077087	ENSG00000103490	29108	1.5	1	0.508915445948464	0	false	0	ENSG00000103490	37872
146.755580344223	6.0	0.6611962980772085	0.16666666666666666	0.0	11	5	ZNF622	protein_coding	4	false	0.07483694675791	ENSG00000173545	90441	2.4	1	0.909433957513816	0	false	0	ENSG00000173545	2227610
157.000249422659	6.5	0.6600096169257893	0.15384615384615385	0.0	12	3	UBFD1	protein_coding	2	false	-0.635334666127854	ENSG00000103353	56061	3.6666666666666665	1	0.235079866090789	0	false	0	ENSG00000103353	2223612
101.948199095543	19.0	0.004513721928371712	0.05263157894736842	0.0	37	2	SIVA1	protein_coding	1	false	-0.0263082229552046	ENSG00000184990	10572	1.5	1	0.977952801898419	0	false	0	ENSG00000184990	15207
1516.53400430764	19.5	0.0	0.05128205128205128	0.0	38	1	MEFV	protein_coding	0	false	1.46161518571155	ENSG00000103313	4210	2.0	1	0.00198400392770372	0	false	0	ENSG00000103313	0
118.532846512813	15.0	0.0035205665675292217	0.06666666666666667	0.0	29	2	IQCB1	protein_coding	1	false	-0.404260338663842	ENSG00000173226	9657	2.5	1	0.396293365859032	0	false	0	ENSG00000173226	11861
1119.19357410126	15.5	0.0	0.06451612903225806	0.0	30	1	CRISPLD2	protein_coding	0	false	1.96082279170486	ENSG00000103196	83716	2.0	1	0.00754875627467452	0	false	0	ENSG00000103196	0
13.141161824807	2.5	0.0	0.4	0.0	4	1	WFDC1	protein_coding	0	false	3.66872380802421	ENSG00000103175	58189	2.0	1	0.0464290284572465	0	false	0	ENSG00000103175	0
210.877015857403	7.5	0.040120983300980094	0.13333333333333333	0.0	14	2	PITPNB	protein_coding	1	false	-0.531360807232526	ENSG00000180957	23760	2.0	1	0.166079725953446	0	false	0	ENSG00000180957	135170
112.267757165033	8.0	0.041179141956510124	0.1250	0.0	15	2	HSDL1	protein_coding	1	false	0.339091270341659	ENSG00000103160	83693	2.0	1	0.614382515808821	0	false	0	ENSG00000103160	138735
73.4320158093628	3.5	0.18995743619882102	0.2857142857142857	0.0	6	3	NUDT19	protein_coding	2	false	0.131335346713022	ENSG00000213965	390916	2.3333333333333335	1	0.848267954378259	0	false	0	ENSG00000213965	639978
131.963856479764	4.0	0.004317524769520281	0.25	0.0	7	2	VAC14	protein_coding	1	false	-0.0884871669218187	ENSG00000103043	55697	2.5	1	0.928005901329854	0	false	0	ENSG00000103043	14546
261.775216967124	8.0	0.0	0.1250	0.0	15	1	USB1	protein_coding	0	false	1.56962702869952	ENSG00000103005	79650	4.0	1	0.00186901772501981	0	false	0	ENSG00000103005	0
39.4184012253436	4.0	0.007191026577146147	0.25	0.0	7	3	HYPK	protein_coding	2	false	0.19472447223785	ENSG00000242028	25764	5.333333333333333	1	0.818745509526365	0	false	0	ENSG00000242028	24227
757.276228197124	4.5	0.0	0.2222222222222222	0.0	8	1	N4BP1	protein_coding	0	false	1.40635194556242	ENSG00000102921	9683	3.0	1	0.00393337209427315	0	false	0	ENSG00000102921	0
269.671819897774	11.0	0.009262524264928495	0.09090909090909091	0.0	21	3	KDELR2	protein_coding	2	false	-0.187363351689591	ENSG00000136240	11014	2.0	1	0.776725868339518	0	false	0	ENSG00000136240	31206
42.6063891179343	11.5	0.0	0.08695652173913043	0.0	22	1	GDPD3	protein_coding	0	false	1.97903460726508	ENSG00000102886	79153	3.0	1	0.0046373378187574	0	false	0	ENSG00000102886	0
170.68622893011	6.5	0.049035636052786234	0.15384615384615385	0.0	12	4	NMD3	protein_coding	3	false	-0.435902453423304	ENSG00000169251	51068	3.0	1	0.314206439425789	0	false	0	ENSG00000169251	165204
311.921601050869	7.0	0.0	0.14285714285714285	0.0	13	1	MAPK3	protein_coding	0	false	1.0547111154081	ENSG00000102882	5595	4.0	1	0.0363704584304515	0	false	0	ENSG00000102882	0
92.2602230336294	30.5	0.051664262435219314	0.03278688524590164	0.0	60	4	FAAP100	protein_coding	3	false	-0.0153894490150786	ENSG00000185504	80233	1.5	1	0.987764357447136	0	false	0	ENSG00000185504	174060
325.04215386834	31.0	0.0	0.03225806451612903	0.0	61	1	OLFM4	protein_coding	0	false	3.06816790842054	ENSG00000102837	10562	4.0	1	0.0493761567941131	0	false	0	ENSG00000102837	0
67.6068037498972	10.5	0.13311724932176927	0.09523809523809523	0.0	20	4	PLCD1	protein_coding	3	false	-0.368514571610914	ENSG00000187091	5333	2.25	1	0.441394988514712	0	false	0	ENSG00000187091	448480
80.5299787180416	11.0	0.0	0.09090909090909091	0.0	21	1	DHRS12	protein_coding	0	false	1.62234506565418	ENSG00000102796	79758	4.0	1	0.0244891234798127	0	false	0	ENSG00000102796	0
13.9350564328985	9.0	0.0829700272479564	0.1111111111111111	0.0	17	2	ADAM32	protein_coding	1	false	-1.23883579287879	ENSG00000197140	203102	3.5	1	0.376099432793472	0	false	0	ENSG00000197140	279531
823.187297616187	9.5	0.08576160709515414	0.10526315789473684	0.0	18	3	INTS6	protein_coding	2	false	0.678334456247839	ENSG00000102786	26512	2.6666666666666665	1	0.0900826350445167	0	false	0	ENSG00000102786	288936
378.873227283268	2.0	0.0	0.5	0.0	3	1	DGKH	protein_coding	0	false	1.67947696040667	ENSG00000102780	160851	188.0	1	0.038197561040787	0	false	0	ENSG00000102780	0
29.4475936603424	5.0	0.5467810012288293	0.2	0.0	9	2	RDH14	protein_coding	1	false	-0.65400742503265	ENSG00000240857	57665	2.5	1	0.461018486693658	0	false	0	ENSG00000240857	1842138
169.018202531975	5.5	0.6063827892646613	0.18181818181818182	0.0	10	3	GLA	protein_coding	2	false	0.689300007028333	ENSG00000102393	2717	3.0	1	0.23554235691388	0	false	0	ENSG00000102393	2042940
98.0368523875482	5.0	0.08144467596302826	0.2	0.0	9	3	TKFC	protein_coding	2	false	0.0893864394356974	ENSG00000149476	26007	2.3333333333333335	1	0.908278177710939	0	false	0	ENSG00000149476	274392
185.009514689291	5.5	0.081280832042172	0.18181818181818182	0.0	10	3	SMS	protein_coding	2	false	0.347945780100134	ENSG00000102172	6611	2.6666666666666665	1	0.465829824414744	0	false	0	ENSG00000102172	273840
165.262856598445	4.5	9.118270378087656E-4	0.2222222222222222	0.0	8	2	HMGA1	protein_coding	1	false	-0.0918689147324415	ENSG00000137309	3159	3.0	1	0.89055549722098	0	false	0	ENSG00000137309	3072
22.1543606443106	5.0	0.0	0.2	0.0	9	1	KCND1	protein_coding	0	false	2.89458511082846	ENSG00000102057	3750	2.0	1	0.00157197400006658	0	false	0	ENSG00000102057	0
9.51500528075898	9.0	0.0019275406196387122	0.1111111111111111	0.0	17	2	PDCD2L	protein_coding	1	false	-0.0803384019096266	ENSG00000126249	84306	2.5	1	0.974783963072105	0	false	0	ENSG00000126249	6494
74.838461571266	9.5	0.0	0.10526315789473684	0.0	18	1	BMX	protein_coding	0	false	2.80706992438948	ENSG00000102010	660	2.0	1	0.0273359937894029	0	false	0	ENSG00000102010	0
44.7667450422152	1.5	0.002104444563171923	0.6666666666666666	0.0	2	3	CSTF2	protein_coding	2	false	0.149044370216806	ENSG00000101811	1478	3.3333333333333335	1	0.849455740305136	0	false	0	ENSG00000101811	7090
8258.44289833148	2.0	0.0	0.5	0.0	3	1	SMCHD1	protein_coding	0	false	1.12346172107991	ENSG00000101596	23347	188.0	1	0.048468119603705	0	false	0	ENSG00000101596	0
843.441415728506	2.0	0.0	0.5	0.0	3	1	ZNF516	protein_coding	0	false	1.4449706737469	ENSG00000101493	9658	188.0	1	0.00238460736033379	0	false	0	ENSG00000101493	0
1039.20787840724	2.0	0.0	0.5	0.0	3	1	APMAP	protein_coding	0	false	1.45657222773968	ENSG00000101474	57136	188.0	1	0.00455129414048648	0	false	0	ENSG00000101474	0
1817.43629733705	3.0	5.580191507423435E-4	0.3333333333333333	0.0	5	2	RHBDD1	protein_coding	1	false	-1.38068108562151	ENSG00000144468	84236	2.0	1	0.0833720544938784	0	false	0	ENSG00000144468	1880
170.26112227658	3.5	0.0	0.2857142857142857	0.0	6	1	BPI	protein_coding	0	false	2.58935246502049	ENSG00000101425	671	2.0	1	0.0166346116745848	0	false	0	ENSG00000101425	0
418.358242711526	16.0	0.014234534261782218	0.0625	0.0	31	2	STAM	protein_coding	1	false	-0.666831440045384	ENSG00000136738	8027	2.0	1	0.324215713130366	0	false	0	ENSG00000136738	47957
12.245781282561	16.5	0.011141386618225854	0.06060606060606061	0.0	32	2	SNTA1	protein_coding	1	false	-1.44349946951212	ENSG00000101400	6640	1.5	1	0.222560509561726	0	false	0	ENSG00000101400	37536
1989.76991651831	5.0	0.0	0.2	0.0	9	1	HCK	protein_coding	0	false	1.11618386092962	ENSG00000101336	3055	5.0	1	0.0346846756689027	0	false	0	ENSG00000101336	0
1415.3061831662	18.5	0.003964310519848266	0.05405405405405406	0.0	36	2	SYK	protein_coding	1	false	0.735972312419425	ENSG00000165025	6850	3.5	1	0.0823359975620032	0	false	0	ENSG00000165025	13356
650.02121885504	19.0	0.0	0.05263157894736842	0.0	37	1	SIRPB1	protein_coding	0	false	1.28368404847352	ENSG00000101307	10326	2.0	1	0.0123037510480673	0	false	0	ENSG00000101307	0
4114.0149442596	2.0	0.0	0.5	0.0	3	1	RASSF2	protein_coding	0	false	1.17266921698691	ENSG00000101265	9770	188.0	1	0.0384567790180608	0	false	0	ENSG00000101265	0
328.994401930294	15.5	0.0032768784171252514	0.06451612903225806	0.0	30	2	UQCRH	protein_coding	1	false	0.13173909802248	ENSG00000173660	7388	2.5	1	0.836534569444593	0	false	0	ENSG00000173660	11040
1711.12080839541	16.0	0.0	0.0625	0.0	31	1	RNF24	protein_coding	0	false	1.95985036775059	ENSG00000101236	11237	2.0	1	8.32486388437932E-5	0	false	0	ENSG00000101236	0
692.508425480825	13.0	0.05241818192611589	0.07692307692307693	0.0	25	3	TXNRD1	protein_coding	2	false	0.530940815461294	ENSG00000198431	7296	4.333333333333333	1	0.216635911061404	0	false	0	ENSG00000198431	176600
643.723151833086	13.5	0.0	0.07407407407407407	0.0	26	1	TPD52L2	protein_coding	0	false	1.00938154013354	ENSG00000101150	7165	3.0	1	0.0129854091584868	0	false	0	ENSG00000101150	0
30.9925690213804	4.0	7.562940404741975E-4	0.25	0.0	7	2	PAIP2B	protein_coding	1	false	-0.514529666858543	ENSG00000124374	400961	1.5	1	0.717019793035949	0	false	0	ENSG00000124374	2548
97.4330348689442	4.5	0.0	0.2222222222222222	0.0	8	1	PABPC1L	protein_coding	0	false	1.42294481332213	ENSG00000101104	80336	2.0	1	0.00750136533251601	0	false	0	ENSG00000101104	0
295.222415025366	12.5	0.002578760841302915	0.08	0.0	24	2	CXCL5	protein_coding	1	false	-6.06930380821645E-4	ENSG00000163735	6374	1.5	1	0.999364425998527	0	false	0	ENSG00000163735	8688
1571.30771401956	13.0	0.0	0.07692307692307693	0.0	25	1	MMP9	protein_coding	0	false	2.85534300096726	ENSG00000100985	4318	2.0	1	0.00307205546434837	0	false	0	ENSG00000100985	0
14.4204377331463	5.0	0.004140620825987071	0.2	0.0	9	2	EMC9	protein_coding	1	false	0.151604540597565	ENSG00000100908	51016	3.0	1	0.925714563080888	0	false	0	ENSG00000100908	13950
2973.83385085653	2.0	0.0	0.5	0.0	3	1	PCNX1	protein_coding	0	false	1.41020504947677	ENSG00000100731	22990	188.0	1	0.00219671083246082	0	false	0	ENSG00000100731	0
1826.52439573878	2.0	0.0	0.5	0.0	3	1	DICER1	protein_coding	0	false	1.05842914631673	ENSG00000100697	23405	188.0	1	0.0365764429969019	0	false	0	ENSG00000100697	0
1280.12385090408	2.0	0.11697565493045538	0.5	0.0	3	4	SRSF5	protein_coding	3	false	-0.290418342410587	ENSG00000100650	6430	6.75	1	0.12522698034934	0	false	0	ENSG00000100650	394098
125.870367722031	5.0	9.51007105839611E-4	0.2	0.0	9	2	TMEM19	protein_coding	1	false	-0.0493121353933757	ENSG00000139291	55266	3.0	1	0.957731193487882	0	false	0	ENSG00000139291	3204
925.014980686766	5.5	0.0	0.18181818181818182	0.0	10	1	SUSD6	protein_coding	0	false	1.03542492622813	ENSG00000100647	9766	2.0	1	0.0133586644848185	0	false	0	ENSG00000100647	0
1434.78941868572	2.0	0.0	0.5	0.0	3	1	SPTLC2	protein_coding	0	false	1.25028032557003	ENSG00000100596	9517	188.0	1	0.00364688962108495	0	false	0	ENSG00000100596	0
606.959399116225	5.0	0.0063551851258214455	0.2	0.0	9	2	TMED8	protein_coding	1	false	1.4080143636029	ENSG00000100580	283578	5.5	1	0.00146344883503993	0	false	0	ENSG00000100580	21411
2314.66148181564	2.0	0.0	0.5	0.0	3	1	PYGL	protein_coding	0	false	1.64601065547881	ENSG00000100504	5836	188.0	1	0.00592521632912746	0	false	0	ENSG00000100504	0
2944.25773447242	2.0	0.0	0.5	0.0	3	1	NIN	protein_coding	0	false	1.01299356659528	ENSG00000100503	51199	188.0	1	0.0208359926256166	0	false	0	ENSG00000100503	0
402.620064996275	31.5	0.24372614319721225	0.031746031746031744	0.0	62	2	CPNE1	protein_coding	1	false	0.347255512207735	ENSG00000214078	8904	3.5	1	0.411380404310572	0	false	0	ENSG00000214078	821128
2072.26263307358	32.0	0.24111235774963935	0.03125	0.0	63	5	ST13	protein_coding	4	false	-1.01778032124056	ENSG00000100380	6767	2.6	1	0.30010662539545	0	false	0	ENSG00000100380	812322
28.3556918658342	18.5	0.003718544638563872	0.05405405405405406	0.0	36	2	SOCS1	protein_coding	1	false	0.27595482716978	ENSG00000185338	8651	3.5	1	0.849127685508346	0	false	0	ENSG00000185338	12528
3000.97510190133	19.0	0.0	0.05263157894736842	0.0	37	1	CSF2RB	protein_coding	0	false	1.30317230832395	ENSG00000100368	1439	2.0	1	0.039538920070271	0	false	0	ENSG00000100368	0
1642.41162554689	2.0	3.080978076971024E-4	0.5	0.0	3	2	PRKDC	protein_coding	1	false	0.0340564007211767	ENSG00000253729	5591	94.5	1	0.966842585538097	0	false	0	ENSG00000253729	1038
1008.45559098885	2.5	0.0	0.4	0.0	4	1	NCF4	protein_coding	0	false	1.78750202864854	ENSG00000100365	4689	2.0	1	0.00375682096525693	0	false	0	ENSG00000100365	0
465.921691863372	3.5	0.0	0.2857142857142857	0.0	6	1	TOM1	protein_coding	0	false	1.06191963062024	ENSG00000100284	10043	13.0	1	0.00720439383727146	0	false	0	ENSG00000100284	0
350.784453814987	14.0	0.0027488379548004484	0.07142857142857142	0.0	27	2	RIC8A	protein_coding	1	false	0.327456032082775	ENSG00000177963	60626	3.0	1	0.392582965534392	0	false	0	ENSG00000177963	9261
911.134937022429	14.5	0.0	0.06896551724137931	0.0	28	1	PACSIN2	protein_coding	0	false	1.12614555749993	ENSG00000100266	11252	2.0	1	0.0146189495650863	0	false	0	ENSG00000100266	0
215.977292480832	2.5	0.023599460977245877	0.4	0.0	4	13	SMNDC1	protein_coding	12	false	0.33776102987792	ENSG00000119953	10285	1.1538461538461537	1	0.408942268951842	0	false	0	ENSG00000119953	79508
603.405403738823	14.0	0.13357108510979324	0.07142857142857142	0.0	27	3	CCNG1	protein_coding	2	false	-0.188324676152831	ENSG00000113328	900	1.6666666666666667	1	0.768454076825145	0	false	0	ENSG00000113328	450009
490.169406340053	15.5	1.2501647343769478	0.06451612903225806	0.0	30	3	PDLIM1	protein_coding	2	false	0.693720409036216	ENSG00000107438	9124	2.3333333333333335	1	0.276869316672111	0	false	0	ENSG00000107438	4211880
85.0873231165587	16.0	0.00889773408606555	0.0625	0.0	31	2	RANBP1	protein_coding	1	false	-0.130076623640221	ENSG00000099901	5902	2.0	1	0.816030320215474	0	false	0	ENSG00000099901	29977
547.694539030062	12.5	0.04767858096917241	0.08	0.0	24	6	CNOT8	protein_coding	5	false	0.213778729708251	ENSG00000155508	9337	1.6666666666666667	1	0.573131194068587	0	false	0	ENSG00000155508	160632
268.56582843818	13.0	0.0	0.07692307692307693	0.0	25	1	GADD45B	protein_coding	0	false	1.20934885897741	ENSG00000099860	4616	6.0	1	0.014163368841818	0	false	0	ENSG00000099860	0
190.805398569848	3.0	0.004446344084106546	0.3333333333333333	0.0	5	2	ITGB3BP	protein_coding	1	false	-0.799385039939453	ENSG00000142856	23421	3.5	1	0.312041819888517	0	false	0	ENSG00000142856	14980
32.7144445983053	3.5	0.004740788231732293	0.2857142857142857	0.0	6	3	EFHC1	protein_coding	2	false	0.159901374474188	ENSG00000096093	114327	1.3333333333333333	1	0.86660427466204	0	false	0	ENSG00000096093	15972
1154.84653708424	13.0	0.0	0.07692307692307693	0.0	25	1	SRPK1	protein_coding	0	false	1.06695155321376	ENSG00000096063	6732	7.0	1	0.0359993198551544	0	false	0	ENSG00000096063	0
171.042239509621	21.0	0.09506865416466313	0.047619047619047616	0.0	41	3	IKBKE	protein_coding	2	false	0.0692952098239666	ENSG00000263528	9641	4.0	1	0.942576176251965	0	false	0	ENSG00000263528	320292
2519.34625852888	21.5	0.0	0.046511627906976744	0.0	42	1	FKBP5	protein_coding	0	false	2.01596400738732	ENSG00000096060	2289	3.0	1	0.0133879210798901	0	false	0	ENSG00000096060	0
96.5516209942502	7.0	0.007296694033350548	0.14285714285714285	0.0	13	2	CCDC12	protein_coding	1	false	0.0270749945298563	ENSG00000160799	151903	2.0	1	0.980553947564036	0	false	0	ENSG00000160799	24583
199.626796885372	7.5	0.006490831270443387	0.13333333333333333	0.0	14	2	CWF19L1	protein_coding	1	false	-0.208740905906535	ENSG00000095485	55280	1.5	1	0.635638044706833	0	false	0	ENSG00000095485	21868
203.896196622719	9.5	0.0	0.10526315789473684	0.0	18	1	TBC1D2	protein_coding	0	false	1.09131755051563	ENSG00000095383	55357	4.0	1	0.00342674595468088	0	false	0	ENSG00000095383	0
524.596049300219	4.0	0.015335731628406736	0.25	0.0	7	5	PA2G4	protein_coding	4	false	-0.574399646907913	ENSG00000170515	5036	2.2	1	0.617230437304752	0	false	0	ENSG00000170515	51667
127.330565922242	4.5	0.0018806432654805791	0.2222222222222222	0.0	8	2	NANS	protein_coding	1	false	-0.190850798248391	ENSG00000095380	54187	3.0	1	0.81964669698371	0	false	0	ENSG00000095380	6336
20659.8068441605	2.0	0.045847803244821995	0.5	0.0	3	8	HLA-B	protein_coding	7	false	0.526303867579491	ENSG00000234745	3106	1.8750	1	0.27187694842213	0	false	0	ENSG00000234745	154464
512.737877102875	2.5	0.0	0.4	0.0	4	1	SH2D3C	protein_coding	0	false	1.02947816386956	ENSG00000095370	10044	8.0	1	0.0344133122382909	0	false	0	ENSG00000095370	0
1609.96202650104	2.0	0.0	0.5	0.0	3	1	PTGS1	protein_coding	0	false	1.55934974946488	ENSG00000095303	5742	188.0	1	0.0125750303460569	0	false	0	ENSG00000095303	0
136.827273527625	12.5	0.009616925789389325	0.08	0.0	24	2	PYROXD1	protein_coding	1	false	-0.276165715597005	ENSG00000121350	79912	2.0	1	0.576360768467858	0	false	0	ENSG00000121350	32400
62.1944110514365	13.0	0.007635660985556802	0.07692307692307693	0.0	25	2	UPRT	protein_coding	1	false	-0.801404734645532	ENSG00000094841	139596	2.0	1	0.0370496906127562	0	false	0	ENSG00000094841	25725
13.8403730936173	6.0	0.08424694128332531	0.16666666666666666	0.0	11	4	LIME1	protein_coding	3	false	0.679598451449604	ENSG00000203896	54923	2.25	1	0.608418093445361	0	false	0	ENSG00000203896	283833
182.020464748395	6.5	0.004348987551423839	0.15384615384615385	0.0	12	2	SEC22C	protein_coding	1	false	0.0435943497414896	ENSG00000093183	9117	2.5	1	0.948953908131079	0	false	0	ENSG00000093183	14652
783.230585333461	6.5	0.0011290983241616355	0.15384615384615385	0.0	12	2	VNN1	protein_coding	1	false	3.01634370500962	ENSG00000112299	8876	1.5	1	3.36227149488811E-6	0	false	0	ENSG00000112299	3804
794.3850879995	7.0	0.0	0.14285714285714285	0.0	13	1	VNN3	protein_coding	0	false	2.11507577828712	ENSG00000093134	55350	2.0	1	0.0366921905495634	0	false	0	ENSG00000093134	0
282.011743607023	5.5	9.349788961906288E-4	0.18181818181818182	0.0	10	2	VPS37B	protein_coding	1	false	0.78634184071381	ENSG00000139722	79720	1.5	1	0.0408204910364387	0	false	0	ENSG00000139722	3150
1405.38244769487	6.0	0.0	0.16666666666666666	0.0	11	1	UNC13D	protein_coding	0	false	1.23814186624116	ENSG00000092929	201294	2.0	1	5.32453102353087E-4	0	false	0	ENSG00000092929	0
852.380589880935	2.0	3.6330608537693006E-4	0.5	0.0	3	2	EZR	protein_coding	1	false	-0.0690658338716987	ENSG00000092820	7430	94.5	1	0.914073647634523	0	false	0	ENSG00000092820	1224
15.119992985484	5.5	0.010275863297180816	0.18181818181818182	0.0	10	3	COLGALT2	protein_coding	2	false	-0.0897806875015926	ENSG00000198756	23127	1.6666666666666667	1	0.968673086328155	0	false	0	ENSG00000198756	34620
27.8949329488394	6.0	0.0	0.16666666666666666	0.0	11	1	COL9A3	protein_coding	0	false	2.12453617580982	ENSG00000092758	1299	3.0	1	0.048822813042992	0	false	0	ENSG00000092758	0
10.2391356770148	5.0	0.003464764652454987	0.2	0.0	9	2	GNMT	protein_coding	1	false	1.03553577420988	ENSG00000124713	27232	2.0	1	0.61072131806637	0	false	0	ENSG00000124713	11673
390.46635850593	5.5	0.0029296005413973034	0.18181818181818182	0.0	10	2	TINF2	protein_coding	1	false	0.416918528421513	ENSG00000092330	26277	1.5	1	0.33936231103119	0	false	0	ENSG00000092330	9870
1966.56660359011	2.0	0.0016161778062723725	0.5	0.0	3	2	HNRNPC	protein_coding	1	false	0.0857816649245834	ENSG00000092199	3183	94.5	1	0.814179137584571	0	false	0	ENSG00000092199	5445
234.246492195597	6.5	0.0032341365247279654	0.15384615384615385	0.0	12	2	ORC2	protein_coding	1	false	-0.300554529225844	ENSG00000115942	4999	2.0	1	0.57346057355034	0	false	0	ENSG00000115942	10896
12.5353700792136	7.0	0.0023190444812499628	0.14285714285714285	0.0	13	2	ORC6	protein_coding	1	false	-0.766115277427587	ENSG00000091651	23594	2.0	1	0.561625064965593	0	false	0	ENSG00000091651	7813
177.666756979945	3.0	0.001521195823167293	0.3333333333333333	0.0	5	2	SCO2	protein_coding	1	false	1.7550603589895	ENSG00000284194	9997	3.0	1	0.0331386113397734	0	false	0	ENSG00000284194	5125
1286.3566743974	3.5	0.0012822567719185766	0.2857142857142857	0.0	6	2	CDV3	protein_coding	1	false	-0.0966758210624382	ENSG00000091527	55573	1.5	1	0.851134003326383	0	false	0	ENSG00000091527	4320
443.817882752694	6.0	0.0	0.16666666666666666	0.0	11	1	NLRC4	protein_coding	0	false	1.68721926409782	ENSG00000091106	58484	3.0	1	0.0116142683192019	0	false	0	ENSG00000091106	0
62.7361028038638	2.5	0.016563670578737096	0.4	0.0	4	3	OTUD3	protein_coding	2	false	-0.774633977783904	ENSG00000169914	23252	2.6666666666666665	1	0.205230749592959	0	false	0	ENSG00000169914	55804
105.151563803885	3.0	0.0024220405691795337	0.3333333333333333	0.0	5	2	ZNF268	protein_coding	1	false	-0.136803626698722	ENSG00000090612	10795	2.0	1	0.828236199369689	0	false	0	ENSG00000090612	8160
412.708319907783	7.5	0.0012466385282541717	0.13333333333333333	0.0	14	2	LDB1	protein_coding	1	false	0.10662541045281	ENSG00000198728	8861	1.5	1	0.834790900466304	0	false	0	ENSG00000198728	4200
2796.48909931326	8.0	0.0	0.1250	0.0	15	1	IRAK3	protein_coding	0	false	2.22217846556364	ENSG00000090376	11213	2.0	1	3.37550191636433E-4	0	false	0	ENSG00000090376	0
203.908370443173	2.5	0.004204140027188593	0.4	0.0	4	2	CUL9	protein_coding	1	false	0.226924265443536	ENSG00000112659	23113	4.5	1	0.665168714832621	0	false	0	ENSG00000112659	14164
65.780750449492	3.0	0.004812915175152713	0.3333333333333333	0.0	5	3	LTBP4	protein_coding	2	false	-0.489829683276886	ENSG00000090006	8425	1.6666666666666667	1	0.641942297466717	0	false	0	ENSG00000090006	16215
402.324526179579	17.5	0.017791906347764657	0.05714285714285714	0.0	34	2	LAMTOR4	protein_coding	1	false	0.867717206124292	ENSG00000188186	389541	3.0	1	0.12554572544838	0	false	0	ENSG00000188186	59942
39.2768472027818	18.0	0.015240156007907249	0.05555555555555555	0.0	35	2	BIRC5	protein_coding	1	false	0.422734653072921	ENSG00000089685	332	2.0	1	0.780179859980546	0	false	0	ENSG00000089685	51345
323.20383642081	1.5	0.03505131995274646	0.6666666666666666	0.0	2	6	NEK4	protein_coding	5	false	-1.05051480198878	ENSG00000114904	6787	2.8333333333333335	1	0.0364313042365166	0	false	0	ENSG00000114904	118090
52.1625480221802	2.0	0.0	0.5	0.0	3	1	CMTM1	protein_coding	0	false	1.7738806010528	ENSG00000089505	113540	6.0	1	0.031460230297826	0	false	0	ENSG00000089505	0
539.988110188426	14.0	0.694502324090399	0.07142857142857142	0.0	27	4	HMGN2	protein_coding	3	false	0.0955029568744729	ENSG00000198830	3151	2.25	1	0.849115103995715	0	false	0	ENSG00000198830	2339820
668.767642350193	14.5	0.0	0.06896551724137931	0.0	28	1	GRAMD1A	protein_coding	0	false	1.5327599224468	ENSG00000089351	57655	4.0	1	7.37662845188155E-4	0	false	0	ENSG00000089351	0
477.681971320994	1.5	0.012660504710512725	0.6666666666666666	0.0	2	13	FUS	protein_coding	12	false	0.0981768011557	ENSG00000089280	2521	1.3076923076923077	1	0.899890453876126	0	false	0	ENSG00000089280	42654
399.59932672042	10.0	0.022112696122954176	0.1	0.0	19	6	APPL1	protein_coding	5	false	-0.239225706726051	ENSG00000157500	26060	1.5	1	0.451627328829935	0	false	0	ENSG00000157500	74499
74.4949401727598	10.5	0.0	0.09523809523809523	0.0	20	1	RPH3A	protein_coding	0	false	2.3800432577571	ENSG00000089169	22895	6.0	1	0.0196238747528644	0	false	0	ENSG00000089169	0
1440.91435642923	8.0	0.0	0.1250	0.0	15	1	PXN	protein_coding	0	false	1.19015542405452	ENSG00000089159	5829	6.0	1	0.00143473446508633	0	false	0	ENSG00000089159	0
33.8236493591806	11.5	0.007718473402076543	0.08695652173913043	0.0	22	3	BBS4	protein_coding	2	false	-0.143433625366904	ENSG00000140463	585	1.3333333333333333	1	0.831858365022162	0	false	0	ENSG00000140463	26004
692.962136813708	12.0	0.0	0.08333333333333333	0.0	23	1	OAS1	protein_coding	0	false	2.21093475873945	ENSG00000089127	4938	3.0	1	0.0179231175979149	0	false	0	ENSG00000089127	0
559.588467277954	6.0	0.031376704481368686	0.16666666666666666	0.0	11	7	DYNLL2	protein_coding	6	false	-0.588652620251077	ENSG00000264364	140735	1.7142857142857142	1	0.367307512436337	0	false	0	ENSG00000264364	105710
10.1225981019978	6.5	0.00951363288276255	0.15384615384615385	0.0	12	2	DZANK1	protein_coding	1	false	-0.437249498420546	ENSG00000089091	55184	4.5	1	0.784910840252827	0	false	0	ENSG00000089091	32052
35.6499911937674	22.0	1.0491226039310668	0.045454545454545456	0.0	43	3	MBLAC2	protein_coding	2	false	-0.834010739050859	ENSG00000176055	153364	3.0	1	0.335815479416806	0	false	0	ENSG00000176055	3534557
300.769840344346	22.5	0.00553744961502615	0.044444444444444446	0.0	44	2	TMEM230	protein_coding	1	false	-0.0260113448799125	ENSG00000089063	29058	2.0	1	0.977490171790511	0	false	0	ENSG00000089063	18656
20.5503594224985	4.5	0.07331421820923344	0.2222222222222222	0.0	8	2	C3orf18	protein_coding	1	false	0.115559671816775	ENSG00000088543	51161	12.5	1	0.925402347463111	0	false	0	ENSG00000088543	247000
65.7392258625202	4.5	0.018329148189702764	0.2222222222222222	0.0	8	6	TMEM185A	protein_coding	5	false	0.980205155773806	ENSG00000269556	84548	5.5	1	0.0880252358629425	0	false	0	ENSG00000269556	61752
14.644516827141	5.0	0.0037425869530373457	0.2	0.0	9	2	GNA11	protein_coding	1	false	0.00725455279892503	ENSG00000088256	2767	3.5	1	0.997208046586063	0	false	0	ENSG00000088256	12609
164.542558892109	14.0	0.0	0.07142857142857142	0.0	27	1	RFX2	protein_coding	0	false	1.53794200254959	ENSG00000087903	5990	2.0	1	0.0161543221410191	0	false	0	ENSG00000087903	0
213.468580696561	18.5	0.4886573703050702	0.05405405405405406	0.0	36	2	H4C6	protein_coding	1	false	-0.695851191426531	ENSG00000274618	8361	4.5	1	0.374820985837461	0	false	0	ENSG00000274618	1646316
1374.31775159116	8.5	0.09618350519135901	0.11764705882352941	0.0	16	4	METTL9	protein_coding	3	false	0.362243152176882	ENSG00000197006	51108	2.0	1	0.653755221089966	0	false	0	ENSG00000197006	324048
595.532259436642	9.0	0.0	0.1111111111111111	0.0	17	1	LPCAT2	protein_coding	0	false	1.39874744726947	ENSG00000087253	54947	4.0	1	0.0324270196763309	0	false	0	ENSG00000087253	0
338.160365352624	4.5	0.07486242453384623	0.2222222222222222	0.0	8	4	OTULINL	protein_coding	3	false	0.495035167236697	ENSG00000145569	54491	6.75	1	0.268594398626331	0	false	0	ENSG00000145569	252216
880.177099073184	5.0	0.0	0.2	0.0	9	1	PGS1	protein_coding	0	false	1.83375007698115	ENSG00000087157	9489	4.0	1	3.62302386399123E-5	0	false	0	ENSG00000087157	0
10.7691421529652	8.0	0.027252408683727802	0.1250	0.0	15	3	MTSS2	protein_coding	2	false	0.573537922320489	ENSG00000132613	92154	2.6666666666666665	1	0.740900934334717	0	false	0	ENSG00000132613	91815
61.9261978858751	8.5	0.017120502454690625	0.11764705882352941	0.0	16	2	ACOX3	protein_coding	1	false	0.21211182163089	ENSG00000087008	8310	2.5	1	0.734764467455819	0	false	0	ENSG00000087008	57680
1589.46566003605	2.5	3.1937691819083067E-4	0.4	0.0	4	2	GRB2	protein_coding	1	false	0.729128617806254	ENSG00000177885	2885	3.0	1	0.0440162758197243	0	false	0	ENSG00000177885	1076
853.208765048771	3.0	0.0	0.3333333333333333	0.0	5	1	LAT2	protein_coding	0	false	1.34942351923522	ENSG00000086730	7462	2.0	1	0.0205712016267881	0	false	0	ENSG00000086730	0
92.764401179344	14.0	0.0	0.07142857142857142	0.0	27	1	CEACAM6	protein_coding	0	false	3.2898790725939	ENSG00000086548	4680	5.0	1	0.00501808084597706	0	false	0	ENSG00000086548	0
10.3403551992233	10.5	0.008863006298492754	0.09523809523809523	0.0	20	3	COQ3	protein_coding	2	false	-0.403870596957455	ENSG00000132423	51805	1.3333333333333333	1	0.797812037396682	0	false	0	ENSG00000132423	29860
116.300596580602	11.0	0.0	0.09090909090909091	0.0	21	1	ITPKC	protein_coding	0	false	1.74837172971303	ENSG00000086544	80271	3.0	1	0.016793143681884	0	false	0	ENSG00000086544	0
73.4955601569204	2.0	0.0	0.5	0.0	3	1	BCORL1	protein_coding	0	false	1.37635518171895	ENSG00000085185	63035	188.0	1	0.0196238747528644	0	false	0	ENSG00000085185	0
100.799186389845	2.0	0.0	0.5	0.0	3	1	KIF3C	protein_coding	0	false	1.20363391618581	ENSG00000084731	3797	188.0	1	0.0392329735462464	0	false	0	ENSG00000084731	0
29.2546505547536	10.5	0.031439036407781396	0.09523809523809523	0.0	20	3	VEGFB	protein_coding	2	false	-0.408832355490896	ENSG00000173511	7423	2.3333333333333335	1	0.754661723391867	0	false	0	ENSG00000173511	105920
574.489605712735	11.0	0.02774394044629659	0.09090909090909091	0.0	21	4	HAL	protein_coding	3	false	1.78509793124817	ENSG00000084110	3034	2.25	1	0.0184038184122713	0	false	0	ENSG00000084110	93471
308.565216410386	27.5	0.28698509376502646	0.03636363636363636	0.0	54	6	SLC22A4	protein_coding	5	false	0.592886236989403	ENSG00000197208	6583	1.5	1	0.378384781364003	0	false	0	ENSG00000197208	966870
4480.9818462475	28.0	0.0	0.03571428571428571	0.0	55	1	SMAP2	protein_coding	0	false	1.41632622419686	ENSG00000084070	64744	6.0	1	0.0406184265593217	0	false	0	ENSG00000084070	0
1554.69475861984	2.0	0.00297679471425264	0.5	0.0	3	3	CYLD	protein_coding	2	false	0.0746647259963808	ENSG00000083799	1540	63.333333333333336	1	0.894711902892162	0	false	0	ENSG00000083799	10029
487.153475712491	2.0	0.0014087015369272141	0.5	0.0	3	2	PDS5B	protein_coding	1	false	0.0528016854568273	ENSG00000083642	23047	94.5	1	0.89348746982696	0	false	0	ENSG00000083642	4746
16.5180972844808	23.0	1.0378666452957204	0.043478260869565216	0.0	45	3	MAP1LC3B2	protein_coding	2	false	1.25484428258914	ENSG00000258102	643246	3.0	1	0.330394243299473	0	false	0	ENSG00000258102	3496635
29.5697132724303	23.5	0.9226870403020426	0.0425531914893617	0.0	46	2	NUFIP1	protein_coding	1	false	-0.715967936950899	ENSG00000083635	26747	3.0	1	0.410678301148509	0	false	0	ENSG00000083635	3108588
348.022775919139	1.5	0.0030554516690115344	0.6666666666666666	0.0	2	4	DIS3	protein_coding	3	false	-0.163148474668521	ENSG00000083520	22894	2.0	1	0.770497817889498	0	false	0	ENSG00000083520	10294
35.7806610729553	7.0	0.10778347669676408	0.14285714285714285	0.0	13	2	BCKDHB	protein_coding	1	false	-1.13327219806038	ENSG00000083123	594	3.0	1	0.027624414618637	0	false	0	ENSG00000083123	363129
13.8749936528289	4.5	0.37709509477421	0.2222222222222222	0.0	8	5	NBPF19	protein_coding	4	false	0.590142141306644	ENSG00000271383	101060226	3.2	1	0.763986887058305	0	false	0	ENSG00000271383	1270456
322.148047360302	5.0	0.0	0.2	0.0	9	1	ITGB5	protein_coding	0	false	1.65211238589796	ENSG00000082781	3693	5.0	1	0.0149479590489354	0	false	0	ENSG00000082781	0
8.92886894053408	18.0	1.3139777860887012	0.05555555555555555	0.0	35	2	TNFRSF11A	protein_coding	1	false	-0.832531542889808	ENSG00000141655	8792	2.5	1	0.705601231996251	0	false	0	ENSG00000141655	4426870
177.650313245889	18.5	1.348848640273548	0.05405405405405406	0.0	36	2	TRAF5	protein_coding	1	false	-0.809496868330767	ENSG00000082512	7188	2.5	1	0.0539591223636996	0	false	0	ENSG00000082512	4544352
223.627368842108	16.5	0.014199806474209422	0.06060606060606061	0.0	32	2	SMARCD3	protein_coding	1	false	1.86407829953377	ENSG00000082014	6604	2.5	1	0.00310175126254637	0	false	0	ENSG00000082014	47840
232.444949505926	14.0	0.018672864241064274	0.07142857142857142	0.0	27	2	PLK3	protein_coding	1	false	0.633101774198775	ENSG00000173846	1263	3.5	1	0.3301285613379	0	false	0	ENSG00000173846	62910
12072.9700975524	14.5	0.0173116536956896	0.06896551724137931	0.0	28	2	PTPRC	protein_coding	1	false	0.467662736556452	ENSG00000081237	5788	2.0	1	0.359522857874243	0	false	0	ENSG00000081237	58324
188.570118786372	14.0	4.247475556980285E-4	0.07142857142857142	0.0	27	2	PLA2G12A	protein_coding	1	false	0.903022629248469	ENSG00000123739	81579	2.0	1	0.201405376278292	0	false	0	ENSG00000123739	1431
407.941986174562	4.5	0.05060165149923124	0.2222222222222222	0.0	8	3	KIAA2013	protein_coding	2	false	0.515791638613813	ENSG00000116685	90231	8.666666666666666	1	0.311333335959928	0	false	0	ENSG00000116685	170480
245.663712108954	5.0	0.0033792808676604154	0.2	0.0	9	2	CLDND1	protein_coding	1	false	-0.170620069964424	ENSG00000080822	56650	2.0	1	0.6869635583165	0	false	0	ENSG00000080822	11385
252.681073106206	7.0	0.12746641496441144	0.14285714285714285	0.0	13	3	PLIN2	protein_coding	2	false	0.517564068167264	ENSG00000147872	123	2.0	1	0.566931324759204	0	false	0	ENSG00000147872	429442
14.18993267237	7.5	0.006997797605266751	0.13333333333333333	0.0	14	2	LIPE	protein_coding	1	false	-0.0854874290704626	ENSG00000079435	3991	2.0	1	0.964549359571415	0	false	0	ENSG00000079435	23576
36.5414437216583	9.0	0.02101624785548491	0.1111111111111111	0.0	17	4	KCTD6	protein_coding	3	false	0.186771661159643	ENSG00000168301	200845	1.5	1	0.852607922651424	0	false	0	ENSG00000168301	70805
16.6276365278513	9.5	0.0	0.10526315789473684	0.0	18	1	DUSP13	protein_coding	0	false	4.45301302783053	ENSG00000079393	51207	4.0	1	0.0126154454527711	0	false	0	ENSG00000079393	0
696.045613851874	2.0	2.1192854980320918E-4	0.5	0.0	3	2	PTPN11	protein_coding	1	false	-0.278189871814909	ENSG00000179295	5781	94.5	1	0.545018822005735	0	false	0	ENSG00000179295	714
245.219630202521	2.5	0.0	0.4	0.0	4	1	CEACAM1	protein_coding	0	false	3.11002591130563	ENSG00000079385	634	2.0	1	1.83893704729848E-4	0	false	0	ENSG00000079385	0
10.2318414074435	6.5	0.08475717262381792	0.15384615384615385	0.0	12	4	MAPK11	protein_coding	3	false	-0.541888153410034	ENSG00000185386	5600	1.75	1	0.681674158748309	0	false	0	ENSG00000185386	285552
593.1151566787	7.0	0.0	0.14285714285714285	0.0	13	1	MKNK1	protein_coding	0	false	1.61740121149676	ENSG00000079277	8569	4.0	1	0.00106099748417437	0	false	0	ENSG00000079277	0
65.7920817544902	4.5	0.021387568045686332	0.2222222222222222	0.0	8	4	TCTN3	protein_coding	3	false	-0.241289749795848	ENSG00000119977	26123	6.75	1	0.710104762701914	0	false	0	ENSG00000119977	72056
34.3519170526648	5.0	0.0	0.2	0.0	9	1	SLC1A3	protein_coding	0	false	3.20734409806194	ENSG00000079215	6507	4.0	1	0.00526831746306265	0	false	0	ENSG00000079215	0
1472.14601750357	21.0	0.011804479587778192	0.047619047619047616	0.0	41	2	PPP2R5C	protein_coding	1	false	-0.233196012230141	ENSG00000078304	5527	2.5	1	0.485611806407216	0	false	0	ENSG00000078304	39770
67.4223858907338	3.5	0.03492724973731545	0.2857142857142857	0.0	6	13	CSNK2B	protein_coding	12	false	0.234932479423091	ENSG00000204435	1460	1.8461538461538463	1	0.651681958548459	0	false	0	ENSG00000204435	117672
17.0286022101033	4.0	0.002196161540607766	0.25	0.0	7	2	TULP3	protein_coding	1	false	-0.193853010238543	ENSG00000078246	7289	7.0	1	0.826296415694706	0	false	0	ENSG00000078246	7399
51.5768100841017	9.0	0.02805530325966293	0.1111111111111111	0.0	17	3	PLD2	protein_coding	2	false	0.282729738731389	ENSG00000129219	5338	3.0	1	0.676015097606149	0	false	0	ENSG00000129219	94520
31.1347651326209	9.5	0.0	0.10526315789473684	0.0	18	1	AMPH	protein_coding	0	false	3.19618252521477	ENSG00000078053	273	3.0	1	0.0177765836920832	0	false	0	ENSG00000078053	0
153.088165424136	4.0	4.716449098561616E-4	0.25	0.0	7	2	ZCCHC17	protein_coding	1	false	-0.00447637019702541	ENSG00000121766	51538	7.0	1	0.996518358689906	0	false	0	ENSG00000121766	1589
855.111212572465	4.5	0.0	0.2222222222222222	0.0	8	1	CST7	protein_coding	0	false	1.36004626135675	ENSG00000077984	8530	2.0	1	0.0423032859147076	0	false	0	ENSG00000077984	0
14.0797503172606	11.0	0.12415896422147424	0.09090909090909091	0.0	21	2	ITGAD	protein_coding	1	false	2.08727064322272	ENSG00000156886	3681	3.0	1	0.123528538167463	0	false	0	ENSG00000156886	418299
132.814161281921	11.5	0.12860204329991154	0.08695652173913043	0.0	22	2	POLD3	protein_coding	1	false	0.305401471110994	ENSG00000077514	10714	2.0	1	0.657320807877321	0	false	0	ENSG00000077514	433268
6.79079680224438	6.0	7.28096264239877E-4	0.16666666666666666	0.0	11	2	PACSIN1	protein_coding	1	false	-0.0601973459579153	ENSG00000124507	29993	1.5	1	0.982752964334958	0	false	0	ENSG00000124507	2453
1128.80240772481	6.5	0.0	0.15384615384615385	0.0	12	1	APBB1IP	protein_coding	0	false	1.02331775060552	ENSG00000077420	54518	2.0	1	0.031636554658059	0	false	0	ENSG00000077420	0
35.9490368069973	11.5	0.011767080431930567	0.08695652173913043	0.0	22	2	EXOSC5	protein_coding	1	false	0.354293887738433	ENSG00000077348	56915	3.0	1	0.743893889026774	0	false	0	ENSG00000077348	39644
197.631678396259	8.5	0.0010448018141558772	0.11764705882352941	0.0	16	2	IL2RG	protein_coding	1	false	0.327239746295576	ENSG00000147168	3561	1.5	1	0.564118645161428	0	false	0	ENSG00000147168	3520
1209.88242824597	9.0	0.0	0.1111111111111111	0.0	17	1	IL4R	protein_coding	0	false	1.24280160653213	ENSG00000077238	3566	2.0	1	0.00156060743074676	0	false	0	ENSG00000077238	0
9.84083516793516	12.0	0.0014882489477777182	0.08333333333333333	0.0	23	2	FEZ1	protein_coding	1	false	-0.807457081004964	ENSG00000149557		3.5	1	0.494827022907346	0	false	0	ENSG00000149557	5014
1019.7272123065	12.5	0.0	0.08	0.0	24	1	DGKD	protein_coding	0	false	1.03362994352803	ENSG00000077044	8527	2.0	1	0.00622637248001469	0	false	0	ENSG00000077044	0
1219.38835463172	8.0	0.0	0.1250	0.0	15	1	NT5C2	protein_coding	0	false	1.39955803752	ENSG00000076685	22978	6.0	1	0.00343662543440471	0	false	0	ENSG00000076685	0
136.068410872264	11.0	0.7228695838008228	0.09090909090909091	0.0	21	5	ZFP90	protein_coding	4	false	-0.694212422608891	ENSG00000184939	146198	2.4	1	0.222560509561726	0	false	0	ENSG00000184939	2435391
169.029750976424	11.5	0.003330305782621859	0.08695652173913043	0.0	22	2	MLH1	protein_coding	1	false	-0.236420644363179	ENSG00000076242	4292	3.0	1	0.602264680488868	0	false	0	ENSG00000076242	11220
128.556077468594	13.0	0.01196179349729598	0.07692307692307693	0.0	25	2	MKRN2	protein_coding	1	false	-0.0766863302449746	ENSG00000075975	23609	3.5	1	0.918902189815673	0	false	0	ENSG00000075975	40300
1555.64945611523	2.0	0.0	0.5	0.0	3	1	FOSL2	protein_coding	0	false	1.43865463935368	ENSG00000075426	2355	188.0	1	9.24296836251875E-5	0	false	0	ENSG00000075426	0
1435.4980367287	2.0	0.0	0.5	0.0	3	1	FNDC3B	protein_coding	0	false	1.32210025500567	ENSG00000075420	64778	188.0	1	4.85707562324279E-4	0	false	0	ENSG00000075420	0
34.1772406695732	6.5	0.5292550444337589	0.15384615384615385	0.0	12	8	CCHCR1	protein_coding	7	false	0.227991494413008	ENSG00000204536	54535	1.6250	1	0.759574116771381	0	false	0	ENSG00000204536	1783092
176.78133162189	7.0	0.0	0.14285714285714285	0.0	13	1	VPS9D1	protein_coding	0	false	1.68710033372883	ENSG00000075399	9605	8.0	1	1.83893704729848E-4	0	false	0	ENSG00000075399	0
52.1458671791774	10.0	0.001173027491347735	0.1	0.0	19	2	COQ9	protein_coding	1	false	0.102109013999758	ENSG00000088682	57017	4.5	1	0.943844409616852	0	false	0	ENSG00000088682	3952
232.88589237905	10.5	0.0	0.09523809523809523	0.0	20	1	SCARF1	protein_coding	0	false	1.88276748174376	ENSG00000074660	8578	2.0	1	0.00286557922929883	0	false	0	ENSG00000074660	0
492.553611609903	5.0	0.0013650691884383181	0.2	0.0	9	3	HPCAL1	protein_coding	2	false	0.111862614310625	ENSG00000115756	3241	3.0	1	0.898552565218267	0	false	0	ENSG00000115756	4599
256.991588503512	5.5	0.0	0.18181818181818182	0.0	10	1	MGLL	protein_coding	0	false	1.78313193944944	ENSG00000074416	11343	3.0	1	0.0100977049040898	0	false	0	ENSG00000074416	0
8.99906941296945	3.0	0.0	0.3333333333333333	0.0	5	1	CA12	protein_coding	0	false	4.56420984976184	ENSG00000074410	771	2.0	1	0.042257827074653	0	false	0	ENSG00000074410	0
124.173903713031	10.5	0.0012050839106456993	0.09523809523809523	0.0	20	2	GALNT11	protein_coding	1	false	-0.185894898471348	ENSG00000178234	63917	2.0	1	0.728529858487044	0	false	0	ENSG00000178234	4060
237.388138251732	11.0	0.0	0.09090909090909091	0.0	21	1	DHRS9	protein_coding	0	false	2.70364610141775	ENSG00000073737	10170	2.0	1	0.00991432748140047	0	false	0	ENSG00000073737	0
33.6611413483511	2.0	0.015374614877740377	0.5	0.0	3	3	NLE1	protein_coding	2	false	-0.424182889053644	ENSG00000073536	54475	7.0	1	0.649204205470104	0	false	0	ENSG00000073536	51798
65.9111737467442	21.0	0.21058218019269467	0.047619047619047616	0.0	41	7	IFI30	protein_coding	6	false	0.654647436240094	ENSG00000216490	10437	2.0	1	0.288435350263088	0	false	0	ENSG00000216490	709464
1404.77583780446	2.0	1.7720076223041442E-4	0.5	0.0	3	2	HSP90AA1	protein_coding	1	false	-0.0868155265488412	ENSG00000080824	3320	94.5	1	0.897213286109148	0	false	0	ENSG00000080824	597
886.448623624499	2.5	0.0	0.4	0.0	4	1	ALPK1	protein_coding	0	false	2.27502302871814	ENSG00000073331	80216	2.0	1	4.96241851446936E-4	0	false	0	ENSG00000073331	0
423.377653612438	3.0	0.3188634218446688	0.3333333333333333	0.0	5	5	PURB	protein_coding	4	false	0.263012814641909	ENSG00000146676	5814	2.2	1	0.542949337023462	0	false	0	ENSG00000146676	1074270
337.298753436676	3.5	0.0026125981727841	0.2857142857142857	0.0	6	2	AP1M1	protein_coding	1	false	0.0855560441154814	ENSG00000072958	8907	3.0	1	0.852607922651424	0	false	0	ENSG00000072958	8802
657.081693108598	2.0	1.7363893786397392E-4	0.5	0.0	3	2	ITPR1	protein_coding	1	false	0.0536117072446344	ENSG00000150995	3708	94.5	1	0.939301031174676	0	false	0	ENSG00000150995	585
343.215248998608	2.5	0.0	0.4	0.0	4	1	IRAG1	protein_coding	0	false	1.73663270732	ENSG00000072952	10335	2.0	1	0.0219756089987427	0	false	0	ENSG00000072952	0
93.5174675243816	9.5	0.6772559705080942	0.10526315789473684	0.0	18	8	SYNJ2BP	protein_coding	7	false	-0.193821982858599	ENSG00000213463	55333	1.75	1	0.810635424841254	0	false	0	ENSG00000213463	2281716
12.9835949728799	10.0	0.0	0.1	0.0	19	1	P4HA2	protein_coding	0	false	2.77152535944029	ENSG00000072682	8974	8.0	1	0.0263253630593815	0	false	0	ENSG00000072682	0
510.105801728191	2.0	0.0	0.5	0.0	3	1	MARK2	protein_coding	0	false	1.02965938332622	ENSG00000072518	2011	188.0	1	0.00773795888791975	0	false	0	ENSG00000072518	0
31.6129423769944	3.0	0.0018922191946715106	0.3333333333333333	0.0	5	2	SRGAP2B	protein_coding	1	false	1.23262875735622	ENSG00000196369	647135	2.0	1	0.336298094334955	0	false	0	ENSG00000196369	6375
97.3929885704848	3.5	0.0019322897187939662	0.2857142857142857	0.0	6	2	PALS1	protein_coding	1	false	-0.599991549124937	ENSG00000072415	64398	2.0	1	0.423842742031924	0	false	0	ENSG00000072415	6510
148.51571458764	3.0	0.002327058586074454	0.3333333333333333	0.0	5	2	SREBF1	protein_coding	1	false	-0.329811893825152	ENSG00000072310	6720	4.0	1	0.59961684972358	0	false	0	ENSG00000072310	7840
2234.45076674657	2.0	0.0	0.5	0.0	3	1	ACTN1	protein_coding	0	false	1.56187156934446	ENSG00000072110	87	188.0	1	9.07095083373497E-5	0	false	0	ENSG00000072110	0
156.687156428055	13.0	0.00604768095551875	0.07692307692307693	0.0	25	2	ZNF277	protein_coding	1	false	-0.517363933595669	ENSG00000198839	11179	2.0	1	0.177308773135037	0	false	0	ENSG00000198839	20375
230.073023935081	13.5	0.004854172974063982	0.07407407407407407	0.0	26	2	PDCD2	protein_coding	1	false	-0.175013741214783	ENSG00000071994	5134	1.5	1	0.665168714832621	0	false	0	ENSG00000071994	16354
82.5280506229931	22.5	0.0	0.044444444444444446	0.0	44	1	ST6GALNAC2	protein_coding	0	false	1.97089442343835	ENSG00000070731	10610	14.0	1	0.0395539526945002	0	false	0	ENSG00000070731	0
489.321971893792	2.0	0.0	0.5	0.0	3	1	NDST1	protein_coding	0	false	1.15339477640043	ENSG00000070614	3340	188.0	1	0.00343662543440471	0	false	0	ENSG00000070614	0
412.14037588518	6.0	0.09262494583058775	0.16666666666666666	0.0	11	2	APLF	protein_coding	1	false	-1.41847938817825	ENSG00000169621	200558	2.0	1	0.019994123548802	0	false	0	ENSG00000169621	312059
134.219211287759	6.5	0.10039714341685811	0.15384615384615385	0.0	12	2	POLB	protein_coding	1	false	0.518467379072567	ENSG00000070501	5423	2.0	1	0.43499511935366	0	false	0	ENSG00000070501	338244
87.1844310673287	2.0	0.0	0.5	0.0	3	1	CLTCL1	protein_coding	0	false	1.75112617743209	ENSG00000070371	8218	188.0	1	5.6557304787602E-4	0	false	0	ENSG00000070371	0
13.2339282117381	10.5	0.0010626109359880797	0.09523809523809523	0.0	20	2	MYH3	protein_coding	1	false	-0.787787287414528	ENSG00000109063	4621	3.5	1	0.607397234963988	0	false	0	ENSG00000109063	3580
253.322064776101	11.0	0.0	0.09090909090909091	0.0	21	1	TMEM260	protein_coding	0	false	1.171740897282	ENSG00000070269	54916	2.0	1	0.00558620955662809	0	false	0	ENSG00000070269	0
118.099251903879	3.0	0.06383976539450173	0.3333333333333333	0.0	5	13	MYO19	protein_coding	12	false	-0.044090439912087	ENSG00000278259	80179	2.076923076923077	1	0.955363240865333	0	false	0	ENSG00000278259	215080
763.712629514339	3.5	0.0	0.2857142857142857	0.0	6	1	RAB27A	protein_coding	0	false	1.02742982037468	ENSG00000069974	5873	13.0	1	0.0185685139278219	0	false	0	ENSG00000069974	0
7.96479802924693	2.0	0.008603586757137006	0.5	0.0	3	5	ZNF579	protein_coding	4	false	-0.0941768440177333	ENSG00000218891	163033	1.8	1	0.970564611899296	0	false	0	ENSG00000218891	28986
193.77515049154	2.5	2.4339133170676685E-4	0.4	0.0	4	2	MAPK6	protein_coding	1	false	-0.0338816653493293	ENSG00000069956	5597	3.0	1	0.960328610082207	0	false	0	ENSG00000069956	820
10.0970980615664	17.0	0.0016945379423340635	0.058823529411764705	0.0	33	2	SLC39A4	protein_coding	1	false	0.208397252681153	ENSG00000147804	55630	2.0	1	0.920048608929131	0	false	0	ENSG00000147804	5709
35.0207017527913	17.5	0.0	0.05714285714285714	0.0	34	1	MAOB	protein_coding	0	false	4.25061446779419	ENSG00000069535	4129	2.0	1	0.00174610057172307	0	false	0	ENSG00000069535	0
65.9428818703975	5.0	7.239408024790297E-4	0.2	0.0	9	2	ST6GALNAC3	protein_coding	1	false	1.68304718231095	ENSG00000184005	256435	2.0	1	0.057090027564584	0	false	0	ENSG00000184005	2439
433.71647426973	3.5	3.027550711474417E-4	0.2857142857142857	0.0	6	2	BARD1	protein_coding	1	false	-0.670412586852567	ENSG00000138376	580	2.5	1	0.410749139709942	0	false	0	ENSG00000138376	1020
227.359787551712	4.0	0.0	0.25	0.0	7	1	BCL3	protein_coding	0	false	1.24433098119577	ENSG00000069399	602	2.0	1	0.040343221021164	0	false	0	ENSG00000069399	0
34.2729415176242	27.5	0.49379708286584384	0.03636363636363636	0.0	54	5	MAGEF1	protein_coding	4	false	-0.0226423316685422	ENSG00000177383	64110	1.6	1	0.985424985914014	0	false	0	ENSG00000177383	1663632
65.9564265658088	28.0	0.0	0.03571428571428571	0.0	55	1	PYGM	protein_coding	0	false	1.6161732737073	ENSG00000068976	5837	5.0	1	0.0243422800585688	0	false	0	ENSG00000068976	0
1248.29232065854	2.5	0.015511745115848337	0.4	0.0	4	4	RPL28	protein_coding	3	false	-0.834977723194056	ENSG00000108107	6158	3.0	1	0.0174095366746237	0	false	0	ENSG00000108107	52260
308.69077737562	3.0	0.008649296836506325	0.3333333333333333	0.0	5	2	SRBD1	protein_coding	1	false	0.022849036992222	ENSG00000068784	55133	3.0	1	0.980218173449015	0	false	0	ENSG00000068784	29140
889.690944085725	2.0	0.0	0.5	0.0	3	1	ATP11A	protein_coding	0	false	1.17404356709476	ENSG00000068650	23250	188.0	1	6.30977578727437E-4	0	false	0	ENSG00000068650	0
173.029611073235	7.0	0.0	0.14285714285714285	0.0	13	1	INPP5A	protein_coding	0	false	1.04153427690647	ENSG00000068383	3632	2.0	1	0.0260985952834322	0	false	0	ENSG00000068383	0
33.8820352707611	26.5	0.8184027592266091	0.03773584905660377	0.0	52	5	EID3	protein_coding	4	false	0.70307601465745	ENSG00000255150	493861	2.4	1	0.367357813974326	0	false	0	ENSG00000255150	2757248
1174.32232125231	27.0	0.0	0.037037037037037035	0.0	53	1	ACSL4	protein_coding	0	false	1.13718582194911	ENSG00000068366	2182	5.0	1	0.0381436881835793	0	false	0	ENSG00000068366	0
668.206325773671	2.0	0.0	0.5	0.0	3	1	HDAC4	protein_coding	0	false	1.30441196660309	ENSG00000068024	9759	188.0	1	4.07219029841748E-4	0	false	0	ENSG00000068024	0
293.053337810528	7.5	0.024521379850759556	0.13333333333333333	0.0	14	2	ICE2	protein_coding	1	false	-0.582964732953368	ENSG00000128915	79664	2.0	1	0.145503154706656	0	false	0	ENSG00000128915	82614
161.232047066882	8.0	0.02556944667058467	0.1250	0.0	15	2	IDH3G	protein_coding	1	false	-0.0999182961674755	ENSG00000067829	3421	2.0	1	0.846522655113525	0	false	0	ENSG00000067829	86145
1124.39297244011	1.5	0.0	0.6666666666666666	0.0	2	1	TNFRSF1A	protein_coding	0	false	1.47063563436926	ENSG00000067182	7132	7.0	1	0.00588571655686193	0	false	0	ENSG00000067182	0
441.944592005937	2.5	0.015756323722343916	0.4	0.0	4	7	TADA3	protein_coding	6	false	0.409633951477266	ENSG00000171148	10474	1.7142857142857142	1	0.361640648603021	0	false	0	ENSG00000171148	53084
2085.9044319894	3.0	0.0	0.3333333333333333	0.0	5	1	KLF6	protein_coding	0	false	1.1622332916119	ENSG00000067082	1316	7.0	1	0.00448205099138868	0	false	0	ENSG00000067082	0
75.9479082897738	1.0	0.007506248033576131	1.0	0.0	1	8	TRMT11	protein_coding	7	false	-0.173818287688919	ENSG00000066651	60487	6.0	1	0.829601557886606	0	false	0	ENSG00000066651	25289
106.074663304233	5.5	4.511644197491288E-4	0.18181818181818182	0.0	10	2	CREM	protein_coding	1	false	-0.368620758639922	ENSG00000095794	1390	2.0	1	0.628751947679564	0	false	0	ENSG00000095794	1520
1410.6423774938	6.0	0.0	0.16666666666666666	0.0	11	1	SPI1	protein_coding	0	false	1.30522336555955	ENSG00000066336	6688	2.0	1	0.0124857579679802	0	false	0	ENSG00000066336	0
123.303331567665	5.0	0.004658866271304162	0.2	0.0	9	2	C2CD2L	protein_coding	1	false	0.206971244954235	ENSG00000172375	9854	5.5	1	0.719560330454436	0	false	0	ENSG00000172375	15696
216.609926844003	5.5	0.004731290033421785	0.18181818181818182	0.0	10	2	PRKCQ	protein_coding	1	false	-0.657513093111422	ENSG00000065675	5588	1.5	1	0.263053598228574	0	false	0	ENSG00000065675	15940
214.361411186369	2.0	0.0	0.5	0.0	3	1	ANKS1A	protein_coding	0	false	1.15149138717341	ENSG00000064999	23294	188.0	1	0.00880014822582427	0	false	0	ENSG00000064999	0
10.7137269097235	5.0	0.013845701768445797	0.2	0.0	9	2	RAB4B	protein_coding	1	false	0.412951849279999	ENSG00000167578	53916	4.0	1	0.815135281110863	0	false	0	ENSG00000167578	46647
94.9167837724448	5.5	0.014947789591161926	0.18181818181818182	0.0	10	2	TAF11	protein_coding	1	false	-0.079269269553067	ENSG00000064995	6882	2.0	1	0.911600325467717	0	false	0	ENSG00000064995	50360
575.788238867222	1.5	0.004723572747294498	0.6666666666666666	0.0	2	7	HNRNPL	protein_coding	6	false	-0.150196887769889	ENSG00000104824	3191	1.2857142857142858	1	0.712243408063247	0	false	0	ENSG00000104824	15914
1513.08980507858	2.0	0.0	0.5	0.0	3	1	SBNO2	protein_coding	0	false	1.4085175763034	ENSG00000064932	22904	7.0	1	0.00162001969209089	0	false	0	ENSG00000064932	0
7.93867138670595	14.0	0.07945984933482929	0.07142857142857142	0.0	27	6	B4GAT1	protein_coding	5	false	-0.261667112216965	ENSG00000174684	11041	1.8333333333333333	1	0.888590281879848	0	false	0	ENSG00000174684	267705
334.589086379854	14.5	0.0	0.06896551724137931	0.0	28	1	FAR2	protein_coding	0	false	1.24139422236607	ENSG00000064763	55711	6.0	1	0.0169678720809575	0	false	0	ENSG00000064763	0
15.3834863921019	7.0	0.12935715006559692	0.14285714285714285	0.0	13	5	ABHD14A	protein_coding	4	false	-0.572571863345753	ENSG00000248487	25864	2.8	1	0.685822513371926	0	false	0	ENSG00000248487	435812
1467.40609727898	7.5	0.0	0.13333333333333333	0.0	14	1	CTSA	protein_coding	0	false	1.05306521203256	ENSG00000064601	5476	5.0	1	0.0119759968612758	0	false	0	ENSG00000064601	0
150.698437069292	13.5	0.07870088392608027	0.07407407407407407	0.0	26	3	SLC4A2	protein_coding	2	false	0.476961821890563	ENSG00000164889	6522	3.0	1	0.393873017469857	0	false	0	ENSG00000164889	265148
242.858386848997	14.0	0.0	0.07142857142857142	0.0	27	1	LPAR2	protein_coding	0	false	1.55932662111144	ENSG00000064547	9170	3.0	1	0.00366959307812138	0	false	0	ENSG00000064547	0
146.381963429534	5.0	0.07857562643586044	0.2	0.0	9	5	YIPF5	protein_coding	4	false	0.152345963115934	ENSG00000145817	81555	3.2	1	0.867665064047199	0	false	0	ENSG00000145817	264726
24.341451984649	5.5	0.004493835075659086	0.18181818181818182	0.0	10	2	TMEM161A	protein_coding	1	false	-0.255325752946155	ENSG00000064545	54929	3.0	1	0.828231134000776	0	false	0	ENSG00000064545	15140
658.390173784476	5.5	4.007052412245552E-4	0.18181818181818182	0.0	10	2	CLEC2D	protein_coding	1	false	-0.423383436730123	ENSG00000069493	29121	1.5	1	0.356429516458226	0	false	0	ENSG00000069493	1350
193.55061387633	6.0	0.0	0.16666666666666666	0.0	11	1	ST3GAL6	protein_coding	0	false	1.56709929898957	ENSG00000064225	10402	2.0	1	0.0356460194047976	0	false	0	ENSG00000064225	0
3315.67572524403	2.0	0.0	0.5	0.0	3	1	VMP1	protein_coding	0	false	1.41612101470801	ENSG00000062716	81671	188.0	1	0.00238460736033379	0	false	0	ENSG00000062716	0
426.994908369751	2.0	0.0	0.5	0.0	3	1	ELMO2	protein_coding	0	false	1.00643184845024	ENSG00000062598	63916	188.0	1	0.0142780961197802	0	false	0	ENSG00000062598	0
1715.33757346846	9.0	0.002972045615097386	0.1111111111111111	0.0	17	3	AMFR	protein_coding	2	false	-0.226261674153516	ENSG00000159461	267	2.0	1	0.852774277846132	0	false	0	ENSG00000159461	10013
725.493673083436	9.5	0.0	0.10526315789473684	0.0	18	1	DGAT2	protein_coding	0	false	1.74864604252066	ENSG00000062282	84649	3.0	1	0.0171393158641936	0	false	0	ENSG00000062282	0
188.853510448556	10.0	0.06705995144046113	0.1	0.0	19	3	UQCR11	protein_coding	2	false	-0.341276661155539	ENSG00000127540	10975	2.3333333333333335	1	0.663061708706857	0	false	0	ENSG00000127540	225929
325.796904225125	10.5	0.007408594682196221	0.09523809523809523	0.0	20	2	SFSWAP	protein_coding	1	false	0.132195879402594	ENSG00000061936	6433	2.0	1	0.826933936456386	0	false	0	ENSG00000061936	24960
45.7720376741679	14.0	0.0010177913127103703	0.07142857142857142	0.0	27	2	SLC2A14	protein_coding	1	false	-0.137590946474571	ENSG00000173262	144195	1.5	1	0.954883554192872	0	false	0	ENSG00000173262	3429
3260.28902335477	14.5	0.0	0.06896551724137931	0.0	28	1	SLC2A3	protein_coding	0	false	2.0621436771604	ENSG00000059804	6515	2.0	1	2.77037751515922E-4	0	false	0	ENSG00000059804	0
21.7063661571681	4.5	0.058891204074727074	0.2222222222222222	0.0	8	5	DNAJC25	protein_coding	4	false	-0.0212090884764375	ENSG00000059769	548645	5.8	1	0.990750076148981	0	false	0	ENSG00000059769	198408
5180.23090667865	9.0	0.0	0.1111111111111111	0.0	17	1	MXD1	protein_coding	0	false	2.20905970692374	ENSG00000059728	4084	2.0	1	0.00149696730361777	0	false	0	ENSG00000059728	0
355.335972662411	2.0	9.990917347865577E-4	0.5	0.0	3	3	NHLRC2	protein_coding	2	false	-0.707584307661978	ENSG00000196865	374354	63.333333333333336	1	0.0548757804091354	0	false	0	ENSG00000196865	3366
980.085784582086	2.5	0.0	0.4	0.0	4	1	TBXAS1	protein_coding	0	false	1.17121614059825	ENSG00000059377	6916	3.0	1	0.00721954712082297	0	false	0	ENSG00000059377	0
353.057063920102	2.0	0.0	0.5	0.0	3	1	CDK14	protein_coding	0	false	1.45024248572002	ENSG00000058091	5218	188.0	1	0.00377419138456502	0	false	0	ENSG00000058091	0
653.043804267337	2.0	0.0	0.5	0.0	3	1	TMCC3	protein_coding	0	false	1.54268511781777	ENSG00000057704	57458	188.0	1	0.0158043641200381	0	false	0	ENSG00000057704	0
176.375778607355	12.5	0.07509038129329842	0.08	0.0	24	7	ISG15	protein_coding	6	false	0.160086001286217	ENSG00000187608	9636	1.5714285714285714	1	0.911210322072536	0	false	0	ENSG00000187608	252984
1141.36288920752	13.0	0.0	0.07692307692307693	0.0	25	1	EIF2AK2	protein_coding	0	false	1.56005023354182	ENSG00000055332	5610	7.0	1	0.0382367795792995	0	false	0	ENSG00000055332	0
151.359568085361	10.0	0.027932717137717937	0.1	0.0	19	4	MICB	protein_coding	3	false	0.437645131870312	ENSG00000204516	4277	2.75	1	0.292946594380052	0	false	0	ENSG00000204516	94107
591.9448382615	10.5	0.0	0.09523809523809523	0.0	20	1	RELT	protein_coding	0	false	1.13107858494438	ENSG00000054967	84957	4.0	1	0.00442609938366599	0	false	0	ENSG00000054967	0
194.991645790412	2.0	0.0	0.5	0.0	3	1	ATP9A	protein_coding	0	false	1.35468126480797	ENSG00000054793	10079	188.0	1	0.0290484168156005	0	false	0	ENSG00000054793	0
921.001616950475	2.0	0.0	0.5	0.0	3	1	KIF1B	protein_coding	0	false	2.02941928158773	ENSG00000054523	23095	188.0	1	2.38446122385054E-6	0	false	0	ENSG00000054523	0
368.750202617833	1.0	0.008287178025918208	1.0	0.0	1	7	RRP12	protein_coding	6	false	0.46294195727143	ENSG00000052749	23223	5.857142857142857	1	0.283656410094288	0	false	0	ENSG00000052749	27920
298.835210556777	12.5	7.978486580826699E-4	0.08	0.0	24	2	PLEKHF2	protein_coding	1	false	0.273989689366304	ENSG00000175895	79666	2.0	1	0.625967885414332	0	false	0	ENSG00000175895	2688
544.819108689787	13.0	0.0	0.07692307692307693	0.0	25	1	HEBP2	protein_coding	0	false	1.03148010318372	ENSG00000051620	23593	2.0	1	0.0220127683632381	0	false	0	ENSG00000051620	0
145.012929091193	11.5	7.183012472321656E-4	0.08695652173913043	0.0	22	2	AP4B1	protein_coding	1	false	0.220251383904532	ENSG00000134262	10717	1.5	1	0.497392864459661	0	false	0	ENSG00000134262	2420
297.678801248348	12.0	0.0	0.08333333333333333	0.0	23	1	FHIP1B	protein_coding	0	false	1.09071202628399	ENSG00000051009	84067	2.0	1	0.0117922898248406	0	false	0	ENSG00000051009	0
87.9354727566705	5.0	0.01300422076187423	0.2	0.0	9	3	MCOLN2	protein_coding	2	false	0.600233486399196	ENSG00000153898	255231	2.3333333333333335	1	0.675032951434748	0	false	0	ENSG00000153898	43812
181.580113483359	5.5	0.006212415332466623	0.18181818181818182	0.0	10	2	LETMD1	protein_coding	1	false	-0.573156649436428	ENSG00000050426	25875	2.5	1	0.148303336459522	0	false	0	ENSG00000050426	20930
26.2224669667988	1.5	0.4798050494796768	0.6666666666666666	0.0	2	17	NOL12	protein_coding	16	false	0.672859830147301	ENSG00000273899	79159	2.823529411764706	1	0.639754083494106	0	false	0	ENSG00000273899	1616492
119.7670974149	2.0	0.005657958006090719	0.5	0.0	3	2	MRPS10	protein_coding	1	false	-0.21379348764935	ENSG00000048544	55173	10.5	1	0.70875692970301	0	false	0	ENSG00000048544	19062
191.612567581261	1.5	0.0010709218595097742	0.6666666666666666	0.0	2	2	HDAC9	protein_coding	1	false	-0.410965546205411	ENSG00000048052	9734	3.0	1	0.471102031649971	0	false	0	ENSG00000048052	3608
130.781969350118	5.0	0.0032991398194155046	0.2	0.0	9	2	SRC	protein_coding	1	false	0.463594131125094	ENSG00000197122	6714	4.5	1	0.473472697705434	0	false	0	ENSG00000197122	11115
1822.7681219321	5.5	0.00336295583931423	0.18181818181818182	0.0	10	3	XK	protein_coding	2	false	0.0158776868320522	ENSG00000047597	7504	1.3333333333333333	1	0.994707545378588	0	false	0	ENSG00000047597	11330
688.055330411327	2.0	0.0013445886983312852	0.5	0.0	3	2	HSPA5	protein_coding	1	false	-0.1712452336864	ENSG00000044574	3309	94.5	1	0.811848737939768	0	false	0	ENSG00000044574	4530
963.410791399642	2.0	8.815515306940214E-5	0.5	0.0	3	2	P4HB	protein_coding	1	false	0.260841725895977	ENSG00000185624	5034	94.5	1	0.578233737015946	0	false	0	ENSG00000185624	297
61.4778362389463	2.5	0.0	0.4	0.0	4	1	TG	protein_coding	0	false	2.18768216762934	ENSG00000042832	7038	2.0	1	0.0339077138825988	0	false	0	ENSG00000042832	0
115.190691139716	1.5	0.014631380859943128	0.6666666666666666	0.0	2	11	SIAH1	protein_coding	10	false	0.329700871640895	ENSG00000196470	6477	1.2727272727272727	1	0.685035544557474	0	false	0	ENSG00000196470	49294
445.892943966207	2.0	0.0	0.5	0.0	3	1	CAPG	protein_coding	0	false	1.40760978232499	ENSG00000042493	822	11.0	1	0.0338489709149811	0	false	0	ENSG00000042493	0
124.501150953813	15.5	8.459332870296165E-4	0.06451612903225806	0.0	30	2	LRSAM1	protein_coding	1	false	0.666906322264435	ENSG00000148356	90678	3.0	1	0.17021668807009	0	false	0	ENSG00000148356	2850
205.168770782635	16.0	0.0	0.0625	0.0	31	1	PHF23	protein_coding	0	false	1.14258237738422	ENSG00000040633	79142	2.0	1	0.0201188412417387	0	false	0	ENSG00000040633	0
35.9915284956181	4.5	0.004183956355778763	0.2222222222222222	0.0	8	3	B3GAT1	protein_coding	2	false	-0.381224408583675	ENSG00000109956	27087	8.0	1	0.760961386679599	0	false	0	ENSG00000109956	14096
765.313691260694	5.0	0.0	0.2	0.0	9	1	ZFYVE16	protein_coding	0	false	1.14383553709183	ENSG00000039319	9765	3.0	1	0.0366910241213821	0	false	0	ENSG00000039319	0
23.0426599537215	7.5	0.006694448896724902	0.13333333333333333	0.0	14	2	HDAC10	protein_coding	1	false	1.22608773276128	ENSG00000100429	83933	3.5	1	0.19047902605784	0	false	0	ENSG00000100429	22554
204.073080014826	8.0	0.006767466296236932	0.1250	0.0	15	2	PI4K2B	protein_coding	1	false	-0.348510602881561	ENSG00000038210	55300	1.5	1	0.561621027498064	0	false	0	ENSG00000038210	22800
112.177315613637	30.5	0.27778668233869386	0.03278688524590164	0.0	60	4	ZMYM6	protein_coding	3	false	0.00499650004356881	ENSG00000163867	9204	1.75	1	0.994707545378588	0	false	0	ENSG00000163867	935880
689.526517956827	31.0	0.0	0.03225806451612903	0.0	61	1	TIMP2	protein_coding	0	false	1.38230937786167	ENSG00000035862	7077	4.0	1	0.00657933174831828	0	false	0	ENSG00000035862	0
98.9801201246917	21.5	0.0010845755195811294	0.046511627906976744	0.0	42	2	LLGL2	protein_coding	1	false	-0.409253886176987	ENSG00000073350	3993	4.0	1	0.655577685138433	0	false	0	ENSG00000073350	3654
296.393184524017	22.0	0.0	0.045454545454545456	0.0	43	1	DAPK2	protein_coding	0	false	1.90345902340392	ENSG00000035664	23604	2.0	1	0.00720439383727146	0	false	0	ENSG00000035664	0
3644.27341171772	2.0	0.0	0.5	0.0	3	1	VCL	protein_coding	0	false	1.22298850507117	ENSG00000035403	7414	188.0	1	0.0399265257928412	0	false	0	ENSG00000035403	0
1017.4081391071	2.0	0.0	0.5	0.0	3	1	GAB2	protein_coding	0	false	1.40747145557314	ENSG00000033327	9846	188.0	1	0.00442891864993902	0	false	0	ENSG00000033327	0
31.2149306743849	8.0	9.260743352745276E-4	0.1250	0.0	15	2	ING2	protein_coding	1	false	0.0911806871107208	ENSG00000168556	3622	2.0	1	0.935030649982327	0	false	0	ENSG00000168556	3120
666.826611108913	8.5	5.936373944067484E-4	0.11764705882352941	0.0	16	2	ARID4A	protein_coding	1	false	0.270148303270257	ENSG00000032219	5926	1.5	1	0.525566063907437	0	false	0	ENSG00000032219	2000
50.6503262138264	20.5	0.22307706007016792	0.04878048780487805	0.0	40	4	FAM43A	protein_coding	3	false	-0.0199068206781946	ENSG00000185112	131583	3.0	1	0.988922597920441	0	false	0	ENSG00000185112	751560
2551.43788262451	21.0	0.0	0.047619047619047616	0.0	41	1	GRN	protein_coding	0	false	1.11792212846354	ENSG00000030582	2896	4.0	1	0.036252826524113	0	false	0	ENSG00000030582	0
282.623610472764	10.0	0.030865285866087274	0.1	0.0	19	2	DCAF8	protein_coding	1	false	0.319014941556775	ENSG00000132716	50717	2.5	1	0.654488196158563	0	false	0	ENSG00000132716	103987
42.1262364732759	10.5	0.03202080105430001	0.09523809523809523	0.0	20	3	TFB1M	protein_coding	2	false	-0.154821920652974	ENSG00000029639	51106	2.0	1	0.840531717459953	0	false	0	ENSG00000029639	107880
175.551759812122	2.0	6.856511905397945E-5	0.5	0.0	3	2	DAXX	protein_coding	1	false	0.238694195473485	ENSG00000204209	1616	9.0	1	0.621929576994298	0	false	0	ENSG00000204209	231
450.620562142356	2.5	0.0	0.4	0.0	4	1	FAS	protein_coding	0	false	1.16766209591129	ENSG00000026103	355	2.0	1	0.0194143050328819	0	false	0	ENSG00000026103	0
387.782558998038	6.0	0.004861593441494066	0.16666666666666666	0.0	11	2	CHORDC1	protein_coding	1	false	0.464780249554094	ENSG00000110172	26973	2.5	1	0.577653540237492	0	false	0	ENSG00000110172	16379
40.2183180728711	6.5	0.005036419654146853	0.15384615384615385	0.0	12	2	TOMM34	protein_coding	1	false	-0.306696953353875	ENSG00000025772	10953	2.0	1	0.71272899006369	0	false	0	ENSG00000025772	16968
1260.84105532118	12.0	0.0	0.08333333333333333	0.0	23	1	TYMP	protein_coding	0	false	1.31790891185063	ENSG00000025708	1890	2.0	1	0.00470537528242236	0	false	0	ENSG00000025708	0
183.561813859654	17.0	0.04301971469786824	0.058823529411764705	0.0	33	4	RRAGA	protein_coding	3	false	0.169733433726938	ENSG00000155876	10670	1.75	1	0.82582088825956	0	false	0	ENSG00000155876	144936
259.711964425216	17.5	0.0	0.05714285714285714	0.0	34	1	RRAGD	protein_coding	0	false	1.51247111606321	ENSG00000025039	58528	4.0	1	0.0179151342568518	0	false	0	ENSG00000025039	0
939.239870321019	1.0	5.295245558108196E-4	1.0	0.0	1	2	BIRC3	protein_coding	1	false	-0.411708319781795	ENSG00000023445	330	14.0	1	0.427007303978774	0	false	0	ENSG00000023445	1784
22.8265711933678	1.5	0.0037304173864520073	0.6666666666666666	0.0	2	6	MRM1	protein_coding	5	false	0.287378448777348	ENSG00000278619	79922	2.3333333333333335	1	0.817377450725577	0	false	0	ENSG00000278619	12568
215.2566271994	2.0	0.0	0.5	0.0	3	1	ALAS1	protein_coding	0	false	1.02361534313657	ENSG00000023330	211	6.0	1	0.0178555228766616	0	false	0	ENSG00000023330	0
115.434096337582	6.0	2.1549037416964968E-4	0.16666666666666666	0.0	11	2	TRAPPC4	protein_coding	1	false	0.294486244187637	ENSG00000196655	51399	1.5	1	0.664560714145197	0	false	0	ENSG00000196655	726
1718.41309841461	6.5	0.0	0.15384615384615385	0.0	12	1	SERPINB1	protein_coding	0	false	1.12305113705611	ENSG00000021355	1992	2.0	1	0.0165309275810828	0	false	0	ENSG00000021355	0
619.293074609541	32.5	0.0012157693837450208	0.03076923076923077	0.0	64	2	CCND2	protein_coding	1	false	-0.355409189297818	ENSG00000118971	894	3.0	1	0.293417948756182	0	false	0	ENSG00000118971	4096
115.596864813466	33.0	0.0	0.030303030303030304	0.0	65	1	HGF	protein_coding	0	false	1.33059525602505	ENSG00000019991	3082	2.0	1	0.0166488293450695	0	false	0	ENSG00000019991	0
2772.34532191079	4.5	0.0	0.2222222222222222	0.0	8	1	SLC11A1	protein_coding	0	false	1.99167768329702	ENSG00000018280	6556	5.0	1	2.84249271132644E-4	0	false	0	ENSG00000018280	0
247.519891788143	3.5	0.3742533525671849	0.2857142857142857	0.0	6	3	RUFY2	protein_coding	2	false	-1.50369196959196	ENSG00000204130	55680	3.3333333333333335	1	0.00375682096525693	0	false	0	ENSG00000204130	1260882
107.568488347359	4.0	0.43154262613310534	0.25	0.0	7	3	RUFY3	protein_coding	2	false	-0.053740500140186	ENSG00000018189	22902	2.0	1	0.959251035093043	0	false	0	ENSG00000018189	1453893
485.014201823839	5.0	0.003908211786076829	0.2	0.0	9	2	ATP2C1	protein_coding	1	false	0.270481318004117	ENSG00000017260	27032	5.0	1	0.635638044706833	0	false	0	ENSG00000017260	13167
737.8559031937	3.5	0.04723157201118412	0.2857142857142857	0.0	6	9	ARPC4	protein_coding	8	false	0.240559281474437	ENSG00000241553	10093	3.3333333333333335	1	0.599911092037089	0	false	0	ENSG00000241553	159126
1526.81030701794	4.0	0.00622280398686874	0.25	0.0	7	3	CLK1	protein_coding	2	false	0.186113092078974	ENSG00000013441	1195	3.6666666666666665	1	0.589154679707481	0	false	0	ENSG00000013441	20965
69.6520122214726	7.5	0.5879022635393848	0.13333333333333333	0.0	14	6	ADSL	protein_coding	5	false	-0.240560244204056	ENSG00000239900	158	2.0	1	0.700798322699563	0	false	0	ENSG00000239900	1980678
1792.1899797458	8.0	0.0	0.1250	0.0	15	1	ALOX5	protein_coding	0	false	1.69227719338513	ENSG00000012779	240	6.0	1	9.25922446295242E-4	0	false	0	ENSG00000012779	0
79.8629322117867	4.0	0.6030509993885534	0.25	0.0	7	22	TMEM199	protein_coding	21	false	-0.0109396935118372	ENSG00000244045	147007	3.6818181818181817	1	0.989814360253529	0	false	0	ENSG00000244045	2031715
1055.13563057471	4.5	0.103765441992722	0.2222222222222222	0.0	8	9	ELOVL5	protein_coding	8	false	0.6187476218264	ENSG00000012660	60481	4.333333333333333	1	0.192591341362911	0	false	0	ENSG00000012660	349592
491.050924631064	2.0	0.0	0.5	0.0	3	1	EXTL3	protein_coding	0	false	1.35261363188197	ENSG00000012232	2137	188.0	1	0.0150952424123772	0	false	0	ENSG00000012232	0
165.995140228265	2.0	4.906413064771776E-4	0.5	0.0	3	2	ANLN	protein_coding	1	false	-1.38167353969765	ENSG00000011426	54443	94.5	1	0.0809154557039118	0	false	0	ENSG00000011426	1653
73.0379569733064	6.0	0.10880957893299614	0.16666666666666666	0.0	11	2	TRIM59	protein_coding	1	false	-0.375763148540505	ENSG00000213186	286827	2.0	1	0.631973099494173	0	false	0	ENSG00000213186	366586
1033.57974475531	6.5	0.11852682944204021	0.15384615384615385	0.0	12	2	ABHD5	protein_coding	1	false	1.73155846177575	ENSG00000011198	51099	2.5	1	0.0125196040266948	0	false	0	ENSG00000011198	399324
27.6521612618017	22.5	6.138210658165778E-4	0.044444444444444446	0.0	44	2	EVA1B	protein_coding	1	false	0.0309335216495093	ENSG00000142694	55194	7.5	1	0.987360188066717	0	false	0	ENSG00000142694	2068
131.205596256766	23.0	0.0	0.043478260869565216	0.0	45	1	TSPAN9	protein_coding	0	false	1.67836571409869	ENSG00000011105	10867	2.0	1	0.0223644245161589	0	false	0	ENSG00000011105	0
38.440260854342	14.5	0.1280796423928336	0.06896551724137931	0.0	28	2	ANKRD54	protein_coding	1	false	0.391215554927987	ENSG00000100124	129138	3.5	1	0.676746944274996	0	false	0	ENSG00000100124	431508
435.19005988721	15.0	0.1322665669355844	0.06666666666666667	0.0	29	4	BTK	protein_coding	3	false	0.459788080025167	ENSG00000010671	695	2.25	1	0.20494961139587	0	false	0	ENSG00000010671	445614
133.68047942951	12.5	0.6882441986785631	0.08	0.0	24	6	EHMT2	protein_coding	5	false	-0.0793710358675088	ENSG00000204371	10919	1.6666666666666667	1	0.897213286109148	0	false	0	ENSG00000204371	2318736
43.1295769908464	13.0	0.0	0.07692307692307693	0.0	25	1	ETV7	protein_coding	0	false	2.85313992667282	ENSG00000010030	51513	6.0	1	0.0395539526945002	0	false	0	ENSG00000010030	0
1093.55441219295	17.5	0.022393783429205772	0.05714285714285714	0.0	34	2	FNIP1	protein_coding	1	false	0.411238959442006	ENSG00000217128	96459	3.0	1	0.470648212657852	0	false	0	ENSG00000217128	75446
219.224237050511	18.0	0.022626489287813217	0.05555555555555555	0.0	35	2	VTA1	protein_coding	1	false	0.22802412963248	ENSG00000009844	51534	2.0	1	0.705529887442403	0	false	0	ENSG00000009844	76230
26.0503193725755	3.0	5.7879645954657974E-5	0.3333333333333333	0.0	5	2	BCAT2	protein_coding	1	false	-0.195606658619928	ENSG00000105552	587	2.0	1	0.828933651543712	0	false	0	ENSG00000105552	195
1974.39331452217	3.5	0.0	0.2857142857142857	0.0	6	1	MMP25	protein_coding	0	false	1.87029839629434	ENSG00000008516	64386	2.0	1	4.79864739925943E-4	0	false	0	ENSG00000008516	0
21.1737852495259	7.0	1.42769793354823E-4	0.14285714285714285	0.0	13	2	HSPBP1	protein_coding	1	false	-0.978636418673039	ENSG00000133265	23640	2.5	1	0.171900713401552	0	false	0	ENSG00000133265	481
141.710409042737	7.5	0.0	0.13333333333333333	0.0	14	1	PGLYRP1	protein_coding	0	false	2.48060376855767	ENSG00000008438	8993	2.0	1	0.022388831945396	0	false	0	ENSG00000008438	0
8.99599674000264	15.5	0.10549233317305123	0.06451612903225806	0.0	30	3	RTEL1	protein_coding	2	false	0.0306906102868522	ENSG00000258366	51750	2.0	1	0.989341567428941	0	false	0	ENSG00000258366	355410
57.0515112139082	16.0	0.0957771603948876	0.0625	0.0	31	3	SS18L2	protein_coding	2	false	-0.22179446640246	ENSG00000008324	51188	2.6666666666666665	1	0.765009740582431	0	false	0	ENSG00000008324	322679
305.256422479161	11.0	0.05862317679115243	0.09090909090909091	0.0	21	4	GIGYF1	protein_coding	3	false	0.186406180462955	ENSG00000146830	64599	1.75	1	0.778690747393614	0	false	0	ENSG00000146830	197505
1729.49198947582	11.5	0.0	0.08695652173913043	0.0	22	1	NADK	protein_coding	0	false	1.40278440056657	ENSG00000008130	65220	4.0	1	0.0101360453464283	0	false	0	ENSG00000008130	0
24.7328303632979	7.5	0.3285474286596261	0.13333333333333333	0.0	14	4	CNPY2	protein_coding	3	false	-0.496352750466134	ENSG00000257727	10330	1.5	1	0.468837690782827	0	false	0	ENSG00000257727	1106896
464.468700185416	8.0	0.0	0.1250	0.0	15	1	MYLIP	protein_coding	0	false	1.04971531230809	ENSG00000007944	29116	4.0	1	0.0343882763457542	0	false	0	ENSG00000007944	0
312.769615823712	5.5	0.01187274788813497	0.18181818181818182	0.0	10	5	ATXN1L	protein_coding	4	false	0.0671084786753124	ENSG00000224470	342371	1.2	1	0.907141379009727	0	false	0	ENSG00000224470	40000
1225.14844389877	6.0	0.0	0.16666666666666666	0.0	11	1	GAS7	protein_coding	0	false	1.13816020736442	ENSG00000007237	8522	5.0	1	0.0194143050328819	0	false	0	ENSG00000007237	0
58.6558325050072	1.0	0.020018343395487168	1.0	0.0	1	3	COX10	protein_coding	2	false	-0.682846942233079	ENSG00000006695	1352	13.333333333333334	1	0.237970324559847	0	false	0	ENSG00000006695	67443
446.695209161442	14.5	2.1608401156405642E-4	0.06896551724137931	0.0	28	2	MEF2C	protein_coding	1	false	-0.416461149201255	ENSG00000081189	4208	1.5	1	0.362011876537353	0	false	0	ENSG00000081189	728
374.434859553012	15.0	0.0	0.06666666666666667	0.0	29	1	IFRD1	protein_coding	0	false	1.33338178840759	ENSG00000006652	3475	2.0	1	0.0413642979794121	0	false	0	ENSG00000006652	0
6102.01149130105	19.0	0.5019566288519646	0.05263157894736842	0.0	37	7	GNAS	protein_coding	6	false	-0.329698510868965	ENSG00000087460	2778	1.5714285714285714	1	0.669935910089959	0	false	0	ENSG00000087460	1691122
40.9208981326588	19.5	0.0	0.05128205128205128	0.0	38	1	TBXA2R	protein_coding	0	false	1.52006428944789	ENSG00000006638	6915	7.0	1	0.0296758575765882	0	false	0	ENSG00000006638	0
283.295930497918	2.0	5.787964595465797E-4	0.5	0.0	3	2	PHTF2	protein_coding	1	false	0.210772044187248	ENSG00000006576	57157	94.5	1	0.701604949352583	0	false	0	ENSG00000006576	1950
157.829053398865	13.5	0.027103108879034506	0.07407407407407407	0.0	26	5	CIB1	protein_coding	4	false	-0.0789089701907491	ENSG00000185043	10519	1.4	1	0.903429324318769	0	false	0	ENSG00000185043	91312
2467.28103359386	14.0	0.0	0.07142857142857142	0.0	27	1	ITGA2B	protein_coding	0	false	2.08221727676059	ENSG00000005961	3674	5.0	1	0.00501808084597706	0	false	0	ENSG00000005961	0
1377.13759898935	13.0	0.0022038788267350535	0.07692307692307693	0.0	25	2	BTG2	protein_coding	1	false	0.769061238091349	ENSG00000159388	7832	4.0	1	0.16481746328936	0	false	0	ENSG00000159388	7425
790.172307494826	13.5	0.002145405543385989	0.07407407407407407	0.0	26	2	FBXL3	protein_coding	1	false	0.290238001762288	ENSG00000005812	26224	1.5	1	0.506023994961389	0	false	0	ENSG00000005812	7228
152.537223107357	0.0	0.0	0.0	0.0	0	27	FBL	protein_coding	27	false	-1.02926798758769	ENSG00000105202	2091	2.888888888888889	0	0.0212781998534437	0	false	0	ENSG00000105202	0
1971.70502649359	1.0	0.08506853543718425	1.0	0.0	1	5	KMT2E	protein_coding	4	false	-0.609600392232683	ENSG00000005483	55904	48.4	1	0.23190611104058	0	false	0	ENSG00000005483	286601
1297.5376302419	19.5	1.691866574059233E-4	0.05128205128205128	0.0	38	2	CAT	protein_coding	1	false	0.065191828479749	ENSG00000121691	847	4.0	1	0.9625885404176	0	false	0	ENSG00000121691	570
261.196965643997	20.0	0.0	0.05	0.0	39	1	MPO	protein_coding	0	false	4.17596053729103	ENSG00000005381	4353	2.0	1	0.00220316707129705	0	false	0	ENSG00000005381	0
83.8497048811796	7.0	0.5577591375635934	0.14285714285714285	0.0	13	5	CEP43	protein_coding	4	false	-0.215349989930012	ENSG00000213066	11116	3.6	1	0.816030320215474	0	false	0	ENSG00000213066	1879124
686.626393934504	7.5	0.0	0.13333333333333333	0.0	14	1	MSL3	protein_coding	0	false	1.17752707347539	ENSG00000005302	10943	5.0	1	0.0171388522267497	0	false	0	ENSG00000005302	0
77.8632980701658	7.5	0.03884525654039999	0.13333333333333333	0.0	14	4	SPATA5L1	protein_coding	3	false	0.143177610080485	ENSG00000171763	79029	2.0	1	0.891594017859114	0	false	0	ENSG00000171763	130872
1063.87663957079	8.0	0.0	0.1250	0.0	15	1	SKAP2	protein_coding	0	false	1.00926529951906	ENSG00000005020	8935	4.0	1	0.0315593693851361	0	false	0	ENSG00000005020	0
595.113363796322	1.5	0.0038075902477248845	0.6666666666666666	0.0	2	5	RBM6	protein_coding	4	false	-0.758310670445776	ENSG00000004534	10180	1.4	1	0.064512955029939	0	false	0	ENSG00000004534	12828
198.287520696558	22.0	0.19922085091984112	0.045454545454545456	0.0	43	14	SMAD3	protein_coding	13	false	-0.371428010029191	ENSG00000166949	4088	1.2857142857142858	1	0.52682717415012	0	false	0	ENSG00000166949	671187
6091.38197562034	22.5	0.0	0.044444444444444446	0.0	44	1	CFLAR	protein_coding	0	false	1.65307586631397	ENSG00000003402	8837	14.0	1	2.5543824622694E-4	0	false	0	ENSG00000003402	0
889.659834297411	33.0	0.03690792090375357	0.030303030303030304	0.0	65	3	STK40	protein_coding	2	false	0.613328139575153	ENSG00000196182	83931	2.3333333333333335	1	0.164445120618964	0	false	0	ENSG00000196182	124345
238.680982211267	33.5	0.0	0.029850746268656716	0.0	66	1	SNX11	protein_coding	0	false	1.31742550233164	ENSG00000002919	29916	3.0	1	0.0100225548353123	0	false	0	ENSG00000002919	0
16.6840656653972	18.0	0.08313001252574902	0.05555555555555555	0.0	35	6	KIT	protein_coding	5	false	0.814219658783416	ENSG00000157404	3815	2.0	1	0.695635669794384	0	false	0	ENSG00000157404	280070
2685.29175746444	18.5	0.019447561040765077	0.05405405405405406	0.0	36	2	FGR	protein_coding	1	false	1.1090162083009	ENSG00000000938	2268	3.5	1	0.00486012687350391	0	false	0	ENSG00000000938	65520
397.032652204355	1.5	0.14374276504425565	0.6666666666666666	0.0	2	188	VIRMA	protein_coding	187	false	-0.163913655539473	ENSG00000164944	25962	1.3457446808510638	1	0.63256805263271	0	false	0	ENSG00000164944	484278
117.040795396141	2.0	0.0	0.5	0.0	3	1	DPM1	protein_coding	0	false	-0.189075292891014	ENSG00000000419	8813	188.0	1	0.785099045144436	0	false	0	ENSG00000000419	0
39.7651081764956	1.5	0.0	0.6666666666666666	0.0	2	1	SCARNA22	scaRNA	0	false	1.95795934402854	ENSG00000249784	677770	7.0	1	0.0498174031771445	0	false	0	ENSG00000249784	0
49.2201909032121	2.5	0.0	0.4	0.0	4	1	SNORA74B	snoRNA	0	false	2.80418243543692	ENSG00000212402	677841	4.0	1	0.016793143681884	0	false	0	ENSG00000212402	0
9.53580790809409	4.5	0.0	0.2222222222222222	0.0	8	1	SNORA65	snoRNA	0	false	2.35465545348155	ENSG00000201302	26783	5.0	1	0.0468809109061872	0	false	0	ENSG00000201302	0
2351.55743754435	4.0	0.0	0.25	0.0	7	1	SNORA73B	snoRNA	0	false	1.87242038240024	ENSG00000200087	26768	4.0	1	0.0267243024637392	0	false	0	ENSG00000200087	0
12.8945636160208	1.0	0.011162757564424497	1.0	0.0	1	5	SNORD3B-2	snoRNA	4	false	0.25677506041828	ENSG00000262074	780852	10.6	1	0.856672864414485	0	false	0	ENSG00000262074	37608
2824.29235806962	4.0	0.0	0.25	0.0	7	1	RNU4-2	snRNA	0	false	2.65456795650709	ENSG00000202538	26834	4.0	1	0.0102403783014738	0	false	0	ENSG00000202538	0
832.789757277	1.5	0.0	0.6666666666666666	0.0	2	1	RNU4-1	snRNA	0	false	2.57847829283084	ENSG00000200795	26835	2.0	1	0.0169813095945536	0	false	0	ENSG00000200795	0
209.129164505136	1.5	0.0	0.6666666666666666	0.0	2	1	RNU5A-1	snRNA	0	false	3.30207307068334	ENSG00000199568	26831	2.0	1	0.0253274765198347	0	false	0	ENSG00000199568	0
112.324201456325	2.0	0.0	0.5	0.0	3	1	SLED1	transcribed_processed_pseudogene	0	false	2.86368310802262	ENSG00000249138	643036	13.0	1	1.68220892051604E-4	0	false	0	ENSG00000249138	0
35.8309178666958	2.0	0.0	0.5	0.0	3	1	RPL21P123	transcribed_processed_pseudogene	0	false	1.45932613374163	ENSG00000240531		12.0	1	0.0482056529651074	0	false	0	ENSG00000240531	0
14.7733669896028	2.0	0.0	0.5	0.0	3	1	AL133517.1	transcribed_processed_pseudogene	0	false	3.52169073377624	ENSG00000232450		7.0	1	0.0219983253170898	0	false	0	ENSG00000232450	0
47.3984629623601	2.5	0.0	0.4	0.0	4	1	NUDT16L2P	transcribed_unitary_pseudogene	0	false	1.57008149466276	ENSG00000246082	152195	2.0	1	0.0455062614274133	0	false	0	ENSG00000246082	0
38.1986883745452	2.5	0.0	0.4	0.0	4	1	AL109809.1	transcribed_unitary_pseudogene	0	false	2.12306821268159	ENSG00000232528	100289473	5.0	1	0.0391893410583177	0	false	0	ENSG00000232528	0
48.4562104661295	2.0	0.0	0.5	0.0	3	1	GTF2IP12	transcribed_unprocessed_pseudogene	0	false	1.76020773010642	ENSG00000283050	101926918	6.0	1	0.0434081040944998	0	false	0	ENSG00000283050	0
215.22394945078	2.0	0.0	0.5	0.0	3	1	H2BC20P	transcribed_unprocessed_pseudogene	0	false	1.43343405817414	ENSG00000261716	337873	4.0	1	0.0384316918342567	0	false	0	ENSG00000261716	0
61.394345141683	2.0	0.0	0.5	0.0	3	1	TPTEP2	transcribed_unprocessed_pseudogene	0	false	1.3100976881623	ENSG00000244627		5.0	1	0.0123207535003346	0	false	0	ENSG00000244627	0
134.041331852483	3.0	0.0	0.3333333333333333	0.0	5	1	FAM157A	transcribed_unprocessed_pseudogene	0	false	1.94191476443297	ENSG00000236438	728262	13.0	1	1.08494960025683E-4	0	false	0	ENSG00000236438	0
39.8957656304674	9.0	0.0	0.1111111111111111	0.0	17	1	FAM157B	transcribed_unprocessed_pseudogene	0	false	1.83525081491711	ENSG00000233013		2.0	1	0.0065437783879744	0	false	0	ENSG00000233013	0
11.0213371765186	9.0	0.13455444545362802	0.1111111111111111	0.0	17	2	NPEPPSP1	transcribed_unprocessed_pseudogene	1	false	-0.111084049567359	ENSG00000274487	440434	2.5	1	0.957278576102046	0	false	0	ENSG00000274487	453322
28.3634938019237	4.5	0.0010519254628887581	0.2222222222222222	0.0	8	2	ADGRE4P	transcribed_unprocessed_pseudogene	1	false	-0.427633558830516	ENSG00000268758	326342	3.0	1	0.851134003326383	0	false	0	ENSG00000268758	3544
287.663905990279	2.5	0.0	0.4	0.0	4	1	NCF1B	transcribed_unprocessed_pseudogene	0	false	1.64870871710955	ENSG00000182487	654816	4.0	1	0.0142659939649594	0	false	0	ENSG00000182487	0
131.07772351743	2.5	0.0	0.4	0.0	4	1	ADCY10P1	transcribed_unprocessed_pseudogene	0	false	1.79402103082056	ENSG00000161912	221442	4.0	1	7.85584773609406E-4	0	false	0	ENSG00000161912	0
224.430921856233	2.0	0.0	0.5	0.0	3	1	PPP4R1L	transcribed_unprocessed_pseudogene	0	false	1.57906435120372	ENSG00000124224		6.0	1	0.00216936344010305	0	false	0	ENSG00000124224	0
80.7706472363139	3.0	0.0	0.3333333333333333	0.0	5	1	TPTEP1	transcribed_unprocessed_pseudogene	0	false	1.83164615497708	ENSG00000100181	387590	13.0	1	0.0160687874702744	0	false	0	ENSG00000100181	0
42.1658527808292	11.5	4.76690827708619E-4	0.08695652173913043	0.0	22	2	PI4KAP1	transcribed_unprocessed_pseudogene	1	false	0.289543889338491	ENSG00000274602	728233	2.5	1	0.897587194347734	0	false	0	ENSG00000274602	1606
83.5168466512749	9.0	0.8719295589867796	0.1111111111111111	0.0	17	2	WASH8P	unprocessed_pseudogene	1	false	-0.368555077992604	ENSG00000226210	100288778	3.0	1	0.779294291222203	0	false	0	ENSG00000226210	2937583
