# Supplementary material for: Buffy Coat Transcriptomic Analysis Reveals Alterations in Host Cell Protein Synthesis and Cell Cycle in Severe COVID-19 Patients
Source: Int J Mol Sci. 2022 Nov 5;23(21):13588. doi: 10.3390/ijms232113588 (PMC9659271; doi:10.3390/ijms232113588)
Supplement: Supplementary file 1 [file ijms-23-13588-s001.zip › Table S4.ods]

## Sheet: Table_S4
Table S4. Centrality scores of the interactive network connecting FBL to all downregulated DEGs.
abundance	AverageShortestPathLength	BetweennessCentrality	ClosenessCentrality	ClusteringCoefficient	Eccentricity	EdgeCount	Gene name	Gene Type	Indegree	IsSingleNode	log2fc	name	NCBI Gene ID	NeighborhoodConnectivity	Outdegree	padj	PartnerOfMultiEdgedNodePairs	selected	SelfLoops	shared name	Stress
117.040795396141	2.0	0.0	0.5	0.0	3	1	DPM1	protein_coding	0	false	-0.189075292891014	ENSG00000000419	8813	112.0	1	0.785099045144436	0	false	0	ENSG00000000419	0
397.032652204355	1.5	0.11929619749344174	0.6666666666666666	0.0	2	112	VIRMA	protein_coding	111	false	-0.163913655539473	ENSG00000164944	25962	1.1250	1	0.63256805263271	0	false	0	ENSG00000164944	139792
192.620188365764	5.5	0.0	0.18181818181818182	0.0	10	1	KRIT1	protein_coding	0	false	-1.78389011855046	ENSG00000001631	889	2.0	1	0.00657933174831828	0	false	0	ENSG00000001631	0
114.20004227374	5.0	0.00754988453720155	0.2	0.0	9	2	TLNRD1	protein_coding	1	false	-0.164197130426722	ENSG00000140406	59274	1.5	1	0.794919598823284	0	false	0	ENSG00000140406	8847
313.435843945916	2.0	0.0	0.5	0.0	3	1	KDM1A	protein_coding	0	false	-1.04102074090128	ENSG00000004487	23028	112.0	1	0.0065437783879744	0	false	0	ENSG00000004487	0
1855.0217351738	22.5	0.0	0.044444444444444446	0.0	44	1	CDC27	protein_coding	0	false	-1.37252067457529	ENSG00000004897	996	3.0	1	0.0325827963950929	0	false	0	ENSG00000004897	0
54.2033995365354	22.0	0.14395642282084237	0.045454545454545456	0.0	43	3	CDC26	protein_coding	2	false	0.247265112454792	ENSG00000176386	246184	1.6666666666666667	1	0.726657395657693	0	false	0	ENSG00000176386	168689
221.309890850612	2.5	0.0	0.4	0.0	4	1	MCUB	protein_coding	0	false	-1.00450229483629	ENSG00000005059	55013	3.0	1	0.0138347194364107	0	false	0	ENSG00000005059	0
119.7670974149	2.0	0.007864783078427657	0.5	0.0	3	3	MRPS10	protein_coding	2	false	-0.21379348764935	ENSG00000048544	55173	8.333333333333334	1	0.70875692970301	0	false	0	ENSG00000048544	9216
98.3486379428919	8.0	0.0	0.1250	0.0	15	1	GCFC2	protein_coding	0	false	-1.38156462370675	ENSG00000005436	6936	2.0	1	5.6557304787602E-4	0	false	0	ENSG00000005436	0
431.023327348605	7.5	0.011565054283729559	0.13333333333333333	0.0	14	2	SYF2	protein_coding	1	false	-0.281984505546969	ENSG00000117614	25949	1.5	1	0.407418746304888	0	false	0	ENSG00000117614	13552
1971.70502649359	1.0	0.06305480600031063	1.0	0.0	1	4	KMT2E	protein_coding	3	false	-0.609600392232683	ENSG00000005483	55904	32.75	1	0.23190611104058	0	false	0	ENSG00000005483	73888
152.537223107357	0.0	0.0	0.0	0.0	0	15	FBL	protein_coding	15	false	-1.02926798758769	ENSG00000105202	2091	3.533333333333333	0	0.0212781998534437	0	false	0	ENSG00000105202	0
462.383108426767	18.5	0.0	0.05405405405405406	0.0	36	1	PDK2	protein_coding	0	false	-2.81061798081299	ENSG00000005882	5164	3.0	1	0.0248539994758615	0	false	0	ENSG00000005882	0
129.81069409598	18.0	0.030555399101899118	0.05555555555555555	0.0	35	3	NDUFB1	protein_coding	2	false	-0.0726940553004909	ENSG00000183648	4707	1.6666666666666667	1	0.923937149584678	0	false	0	ENSG00000183648	35805
176.429680804866	2.5	0.0	0.4	0.0	4	1	DBF4	protein_coding	0	false	-1.62536259663907	ENSG00000006634	10926	4.0	1	7.1214125095813E-4	0	false	0	ENSG00000006634	0
175.551759812122	2.0	0.006671752832806795	0.5	0.0	3	4	DAXX	protein_coding	3	false	0.238694195473485	ENSG00000204209	1616	6.5	1	0.621929576994298	0	false	0	ENSG00000204209	7818
58.6558325050072	1.0	0.013560265095075465	1.0	0.0	1	2	COX10	protein_coding	1	false	-0.682846942233079	ENSG00000006695	1352	9.0	1	0.237970324559847	0	false	0	ENSG00000006695	15890
212.860083802811	9.0	0.0	0.1111111111111111	0.0	17	1	ST7L	protein_coding	0	false	-1.47607309524868	ENSG00000007341	54879	4.0	1	0.0119039255239252	0	false	0	ENSG00000007341	0
137.750217494263	8.5	0.7519333405017554	0.11764705882352941	0.0	16	4	RNF5	protein_coding	3	false	-0.268692280373142	ENSG00000204308	6048	2.5	1	0.788869633548273	0	false	0	ENSG00000204308	881120
154.147773436641	10.0	0.0021240717320102475	0.1	0.0	19	2	PIGQ	protein_coding	1	false	-0.655247838157483	ENSG00000007541	9091	2.0	1	0.50205221858385	0	false	0	ENSG00000007541	2489
184.210948584046	9.5	0.01654369409270818	0.10526315789473684	0.0	18	2	JTB	protein_coding	1	false	-0.241944628199509	ENSG00000143543	10899	2.5	1	0.785429874915829	0	false	0	ENSG00000143543	19386
57.0515112139082	16.0	0.1671684562120351	0.0625	0.0	31	2	SS18L2	protein_coding	1	false	-0.22179446640246	ENSG00000008324	51188	2.5	1	0.765009740582431	0	false	0	ENSG00000008324	195889
8.99599674000264	15.5	0.19006559106200172	0.06451612903225806	0.0	30	3	RTEL1	protein_coding	2	false	0.0306906102868522	ENSG00000258366	51750	2.0	1	0.989341567428941	0	false	0	ENSG00000258366	222720
1019.48797956843	13.0	0.0	0.07692307692307693	0.0	25	1	NFIX	protein_coding	0	false	-2.08886227760433	ENSG00000008441	4784	7.0	1	0.044876046421119	0	false	0	ENSG00000008441	0
133.68047942951	12.5	0.6838879473223384	0.08	0.0	24	7	EHMT2	protein_coding	6	false	-0.0793710358675088	ENSG00000204371	10919	1.7142857142857142	1	0.897213286109148	0	false	0	ENSG00000204371	801384
1960.47798994396	18.5	0.0	0.05405405405405406	0.0	36	1	RPS20	protein_coding	0	false	-1.33284021398927	ENSG00000008988	6224	8.0	1	3.83191207014537E-5	0	false	0	ENSG00000008988	0
36.1266724188875	18.0	0.6721590433911415	0.05555555555555555	0.0	35	8	H3C6	protein_coding	7	false	-0.0201953089064999	ENSG00000274750	8353	1.25	1	0.99072227025377	0	false	0	ENSG00000274750	787640
219.224237050511	18.0	0.06406777231043363	0.05555555555555555	0.0	35	2	VTA1	protein_coding	1	false	0.22802412963248	ENSG00000009844	51534	2.0	1	0.705529887442403	0	false	0	ENSG00000009844	75075
1093.55441219295	17.5	0.08925026838913608	0.05714285714285714	0.0	34	2	FNIP1	protein_coding	1	false	0.411238959442006	ENSG00000217128	96459	2.5	1	0.470648212657852	0	false	0	ENSG00000217128	104584
1733.89106554624	22.5	0.0	0.044444444444444446	0.0	44	1	RANBP9	protein_coding	0	false	-1.52277077153692	ENSG00000010017	10048	7.0	1	0.0207171319169852	0	false	0	ENSG00000010017	0
198.287520696558	22.0	0.18241330049513316	0.045454545454545456	0.0	43	7	SMAD3	protein_coding	6	false	-0.371428010029191	ENSG00000166949	4088	1.2857142857142858	1	0.52682717415012	0	false	0	ENSG00000166949	213753
390.731293938183	19.5	0.0	0.05128205128205128	0.0	38	1	CD4	protein_coding	0	false	-1.30378355726765	ENSG00000010610	920	3.0	1	0.0199725428873671	0	false	0	ENSG00000010610	0
101.948199095543	19.0	0.03542736596330792	0.05263157894736842	0.0	37	3	SIVA1	protein_coding	2	false	-0.0263082229552046	ENSG00000184990	10572	1.3333333333333333	1	0.977952801898419	0	false	0	ENSG00000184990	41514
435.19005988721	15.0	0.27445669334343736	0.06666666666666667	0.0	29	2	BTK	protein_coding	1	false	0.459788080025167	ENSG00000010671	695	2.5	1	0.20494961139587	0	false	0	ENSG00000010671	321610
38.440260854342	14.5	0.2869519357299758	0.06896551724137931	0.0	28	2	ANKRD54	protein_coding	1	false	0.391215554927987	ENSG00000100124	129138	2.0	1	0.676746944274996	0	false	0	ENSG00000100124	336252
361.176556383441	2.0	0.0	0.5	0.0	3	1	MRC2	protein_coding	0	false	-2.32934285028707	ENSG00000011028	9902	112.0	1	0.0326418074513124	0	false	0	ENSG00000011028	0
1033.57974475531	6.5	0.2551343823124306	0.15384615384615385	0.0	12	2	ABHD5	protein_coding	1	false	1.73155846177575	ENSG00000011198	51099	2.0	1	0.0125196040266948	0	false	0	ENSG00000011198	298968
73.0379569733064	6.0	0.24244371508594426	0.16666666666666666	0.0	11	2	TRIM59	protein_coding	1	false	-0.375763148540505	ENSG00000213186	286827	2.0	1	0.631973099494173	0	false	0	ENSG00000213186	284097
14.9515050442	16.5	0.023867431981061712	0.06060606060606061	0.0	32	2	QPCTL	protein_coding	1	false	0.133788995361576	ENSG00000011478	54814	1.5	1	0.905527660486983	0	false	0	ENSG00000011478	27968
13.9595820783823	16.0	0.04714261575721578	0.0625	0.0	31	2	CHN2	protein_coding	1	false	0.155379565465844	ENSG00000106069	1124	2.0	1	0.939670136693026	0	false	0	ENSG00000106069	55242
1055.13563057471	4.5	0.09557213395391387	0.2222222222222222	0.0	8	5	ELOVL5	protein_coding	4	false	0.6187476218264	ENSG00000012660	60481	4.2	1	0.192591341362911	0	false	0	ENSG00000012660	111992
79.8629322117867	4.0	0.6406836967894003	0.25	0.0	7	15	TMEM199	protein_coding	14	false	-0.0109396935118372	ENSG00000244045	147007	2.6	1	0.989814360253529	0	false	0	ENSG00000244045	750757
297.26757521525	22.5	0.0	0.044444444444444446	0.0	44	1	CD6	protein_coding	0	false	-1.40375963155802	ENSG00000013725	923	7.0	1	0.00705314577595528	0	false	0	ENSG00000013725	0
107.568488347359	4.0	0.47328312024345326	0.25	0.0	7	4	RUFY3	protein_coding	3	false	-0.053740500140186	ENSG00000018189	22902	1.75	1	0.959251035093043	0	false	0	ENSG00000018189	554596
247.519891788143	3.5	0.41026927665500945	0.2857142857142857	0.0	6	2	RUFY2	protein_coding	1	false	-1.50369196959196	ENSG00000204130	55680	3.0	1	0.00375682096525693	0	false	0	ENSG00000204130	480756
4152.24168359876	5.5	0.0	0.18181818181818182	0.0	10	1	CD74	protein_coding	0	false	-1.04635232027313	ENSG00000019582	972	2.0	1	0.0256184167907787	0	false	0	ENSG00000019582	0
160.229568760673	5.0	0.0068663242891741465	0.2	0.0	9	2	DGKE	protein_coding	1	false	-0.855166436057767	ENSG00000153933	8526	1.5	1	0.134721547896639	0	false	0	ENSG00000153933	8046
1718.41309841461	6.5	0.01964147649013574	0.15384615384615385	0.0	12	2	SERPINB1	protein_coding	1	false	1.12305113705611	ENSG00000021355	1992	2.0	1	0.0165309275810828	0	false	0	ENSG00000021355	23016
115.434096337582	6.0	0.026359312036292697	0.16666666666666666	0.0	11	2	TRAPPC4	protein_coding	1	false	0.294486244187637	ENSG00000196655	51399	2.0	1	0.664560714145197	0	false	0	ENSG00000196655	30888
286.929383711101	9.5	0.005483842888669285	0.10526315789473684	0.0	18	2	GCLM	protein_coding	1	false	-0.0537953207806832	ENSG00000023909	2730	1.5	1	0.960328610082207	0	false	0	ENSG00000023909	6426
310.242485311507	9.0	0.01803284844078286	0.1111111111111111	0.0	17	2	PARP12	protein_coding	1	false	0.424790037500112	ENSG00000059378	64761	2.0	1	0.601740808004637	0	false	0	ENSG00000059378	21131
525.690818025334	7.0	0.0	0.14285714285714285	0.0	13	1	VRK2	protein_coding	0	false	-1.70913212146447	ENSG00000028116	7444	2.0	1	0.00470537528242236	0	false	0	ENSG00000028116	0
195.33186795217	6.5	0.009032211816631762	0.15384615384615385	0.0	12	2	CTDNEP1	protein_coding	1	false	-0.528749712533885	ENSG00000175826	23399	2.0	1	0.424664428877184	0	false	0	ENSG00000175826	10584
42.1262364732759	10.5	0.006673459599967913	0.09523809523809523	0.0	20	2	TFB1M	protein_coding	1	false	-0.154821920652974	ENSG00000029639	51106	2.0	1	0.840531717459953	0	false	0	ENSG00000029639	7820
282.623610472764	10.0	0.02057593151084736	0.1	0.0	19	2	DCAF8	protein_coding	1	false	0.319014941556775	ENSG00000132716	50717	2.0	1	0.654488196158563	0	false	0	ENSG00000132716	24111
1396.02976986037	17.0	0.0	0.058823529411764705	0.0	33	1	FAM13B	protein_coding	0	false	-1.00531036313991	ENSG00000031003	51306	2.0	1	0.0371565136430959	0	false	0	ENSG00000031003	0
135.878034415579	7.5	0.0	0.13333333333333333	0.0	14	1	IFT88	protein_coding	0	false	-1.09983286546366	ENSG00000032742	8100	10.0	1	0.0198709451471264	0	false	0	ENSG00000032742	0
83.8497048811796	7.0	0.6921427266970812	0.14285714285714285	0.0	13	10	CEP43	protein_coding	9	false	-0.215349989930012	ENSG00000213066	11116	1.6	1	0.816030320215474	0	false	0	ENSG00000213066	811057
1030.04463111444	2.0	0.0	0.5	0.0	3	1	CLEC16A	protein_coding	0	false	-1.64542346266474	ENSG00000038532	23274	112.0	1	0.0318008970815074	0	false	0	ENSG00000038532	0
37.3834154223024	4.5	0.0	0.2222222222222222	0.0	8	1	SPATA7	protein_coding	0	false	-2.22230878459527	ENSG00000042317	55812	3.0	1	0.00665968275086214	0	false	0	ENSG00000042317	0
108.378641131138	4.0	0.18572784232202258	0.25	0.0	7	3	NUDT22	protein_coding	2	false	0.433682236945958	ENSG00000149761	84304	2.0	1	0.265808239135056	0	false	0	ENSG00000149761	217637
512.908305408703	6.0	0.0	0.16666666666666666	0.0	11	1	CNTLN	protein_coding	0	false	-1.87674719430376	ENSG00000044459	54875	2.0	1	0.00267622038489545	0	false	0	ENSG00000044459	0
74.4589810326209	5.5	0.007381767971831515	0.18181818181818182	0.0	10	2	RFK	protein_coding	1	false	-0.358706672591468	ENSG00000135002	55312	1.5	1	0.725391423295963	0	false	0	ENSG00000135002	8650
26.7043047386056	6.5	0.008008151519961496	0.15384615384615385	0.0	12	2	SCML1	protein_coding	1	false	-0.602483179642114	ENSG00000047634	6322	2.5	1	0.600381136306749	0	false	0	ENSG00000047634	9384
559.588467277954	6.0	0.0187650515529021	0.16666666666666666	0.0	11	4	DYNLL2	protein_coding	3	false	-0.588652620251077	ENSG00000264364	140735	1.5	1	0.367307512436337	0	false	0	ENSG00000264364	21989
142.582194541727	4.5	0.012193144599020657	0.2222222222222222	0.0	8	2	TSPAN17	protein_coding	1	false	-0.450999714681211	ENSG00000048140	26262	8.5	1	0.517053885012784	0	false	0	ENSG00000048140	14288
26.2224669667988	1.5	0.5721356606810343	0.6666666666666666	0.0	2	22	NOL12	protein_coding	21	false	0.672859830147301	ENSG00000273899	79159	2.772727272727273	1	0.639754083494106	0	false	0	ENSG00000273899	670432
374.471170272934	33.5	0.0	0.029850746268656716	0.0	66	1	R3HDM1	protein_coding	0	false	-1.53576104124893	ENSG00000048991	23518	2.0	1	0.00266385118021486	0	false	0	ENSG00000048991	0
333.057561072587	33.0	0.04764867222048701	0.030303030303030304	0.0	65	2	PATL1	protein_coding	1	false	0.638337552992837	ENSG00000166889	219988	2.5	1	0.17641763288991	0	false	0	ENSG00000166889	55835
13.6850683625176	4.0	0.006272369317105391	0.25	0.0	7	2	RAD51	protein_coding	1	false	0.0927334939553811	ENSG00000051180	5888	5.5	1	0.959933243588379	0	false	0	ENSG00000051180	7350
67.4223858907338	3.5	0.04841757082657027	0.2857142857142857	0.0	6	10	CSNK2B	protein_coding	9	false	0.234932479423091	ENSG00000204435	1460	1.9	1	0.651681958548459	0	false	0	ENSG00000204435	56736
448.366733336028	2.0	0.0	0.5	0.0	3	1	MPHOSPH9	protein_coding	0	false	-1.45866823615879	ENSG00000051825	10198	112.0	1	0.00226515871189559	0	false	0	ENSG00000051825	0
368.750202617833	1.0	0.010615238358567886	1.0	0.0	1	14	RRP12	protein_coding	13	false	0.46294195727143	ENSG00000052749	23223	2.4285714285714284	1	0.283656410094288	0	false	0	ENSG00000052749	12439
326.955454557879	8.5	0.029056004150857736	0.11764705882352941	0.0	16	2	SIRT5	protein_coding	1	false	-1.26931002756434	ENSG00000124523	23408	3.0	1	0.0710048789885735	0	false	0	ENSG00000124523	34048
21.7063661571681	4.5	0.05513540637272722	0.2222222222222222	0.0	8	2	DNAJC25	protein_coding	1	false	-0.0212090884764375	ENSG00000059769	548645	8.5	1	0.990750076148981	0	false	0	ENSG00000059769	64608
707.715618449765	2.0	0.0	0.5	0.0	3	1	CCAR1	protein_coding	0	false	-1.06368547048568	ENSG00000060339	55749	112.0	1	0.026969903161485	0	false	0	ENSG00000060339	0
1495.79143250243	2.5	0.0	0.4	0.0	4	1	RPL18	protein_coding	0	false	-1.13372482056643	ENSG00000063177	6141	10.0	1	0.00665304230812587	0	false	0	ENSG00000063177	0
361.50089757188	2.0	0.2562531681865428	0.5	0.0	3	10	ZNF770	protein_coding	9	false	-0.0485836748595108	ENSG00000198146	54989	4.2	1	0.948841442675217	0	false	0	ENSG00000198146	300279
316.956686703305	13.5	0.0027513086637207863	0.07407407407407407	0.0	26	2	BTBD1	protein_coding	1	false	-0.155192553676415	ENSG00000064726	53339	1.5	1	0.792446696816074	0	false	0	ENSG00000064726	3224
8.66731454115516	13.0	0.020737221007572925	0.07692307692307693	0.0	25	2	TACSTD2	protein_coding	1	false	2.74560729375776	ENSG00000184292	4070	2.0	1	0.156435969142353	0	false	0	ENSG00000184292	24300
1798.26467419761	2.0	0.0	0.5	0.0	3	1	PKN2	protein_coding	0	false	-1.2171951600812	ENSG00000065243	5586	112.0	1	0.0166346116745848	0	false	0	ENSG00000065243	0
528.700090111429	2.0	0.0	0.5	0.0	3	1	TBC1D22B	protein_coding	0	false	-1.63722912243471	ENSG00000065491	55633	6.0	1	0.0368756265221942	0	false	0	ENSG00000065491	0
115.190691139716	1.5	0.012863904093339682	0.6666666666666666	0.0	2	6	SIAH1	protein_coding	5	false	0.329700871640895	ENSG00000196470	6477	1.6666666666666667	1	0.685035544557474	0	false	0	ENSG00000196470	15074
8339.99686177171	2.0	0.0	0.5	0.0	3	1	YBX1	protein_coding	0	false	-1.87875985469426	ENSG00000065978	4904	112.0	1	0.0165309275810828	0	false	0	ENSG00000065978	0
75.9479082897738	1.0	0.003661015560596208	1.0	0.0	1	4	TRMT11	protein_coding	3	false	-0.173818287688919	ENSG00000066651	60487	5.25	1	0.829601557886606	0	false	0	ENSG00000066651	4290
68.3486829359839	8.5	0.0	0.11764705882352941	0.0	16	1	RRP15	protein_coding	0	false	-1.26474182939688	ENSG00000067533	51018	2.0	1	0.00296096730320976	0	false	0	ENSG00000067533	0
74.0265430521799	8.0	0.010765433868746191	0.1250	0.0	15	2	CLN8	protein_coding	1	false	0.232013935703899	ENSG00000182372	2055	1.5	1	0.823263347687351	0	false	0	ENSG00000182372	12615
161.232047066882	8.0	0.03015857573693939	0.1250	0.0	15	2	IDH3G	protein_coding	1	false	-0.0999182961674755	ENSG00000067829	3421	3.0	1	0.846522655113525	0	false	0	ENSG00000067829	35340
293.053337810528	7.5	0.04643942768683553	0.13333333333333333	0.0	14	3	ICE2	protein_coding	2	false	-0.582964732953368	ENSG00000128915	79664	1.6666666666666667	1	0.145503154706656	0	false	0	ENSG00000128915	54418
367.947439688395	13.5	0.01786131834109059	0.07407407407407407	0.0	26	2	CBFB	protein_coding	1	false	-0.240933219621007	ENSG00000067955	865	1.5	1	0.503261541225954	0	false	0	ENSG00000067955	20930
13.6067560441537	13.0	0.03503139598192875	0.07692307692307693	0.0	25	2	SLC25A32	protein_coding	1	false	-0.539825608837071	ENSG00000164933	81034	3.0	1	0.687184258555437	0	false	0	ENSG00000164933	41050
70.754154936684	9.0	0.0	0.1111111111111111	0.0	17	1	FUNDC1	protein_coding	0	false	-1.4144771929289	ENSG00000069509	139341	4.0	1	0.0366910241213821	0	false	0	ENSG00000069509	0
1374.31775159116	8.5	0.31374476662519224	0.11764705882352941	0.0	16	4	METTL9	protein_coding	3	false	0.362243152176882	ENSG00000197006	51108	1.75	1	0.653755221089966	0	false	0	ENSG00000197006	367648
134.298191957466	4.0	0.0	0.25	0.0	7	1	RNF126	protein_coding	0	false	-1.15477222092981	ENSG00000070423	55658	10.0	1	0.00680852467677081	0	false	0	ENSG00000070423	0
134.219211287759	6.5	0.20551866093875606	0.15384615384615385	0.0	12	2	POLB	protein_coding	1	false	0.518467379072567	ENSG00000070501	5423	2.0	1	0.43499511935366	0	false	0	ENSG00000070501	240828
412.14037588518	6.0	0.19620227238979832	0.16666666666666666	0.0	11	2	APLF	protein_coding	1	false	-1.41847938817825	ENSG00000169621	200558	2.0	1	0.019994123548802	0	false	0	ENSG00000169621	229911
280.18294980095	4.0	0.0	0.25	0.0	7	1	RAD18	protein_coding	0	false	-1.90941280820272	ENSG00000070950	56852	10.0	1	0.00397762911600213	0	false	0	ENSG00000070950	0
2124.40407904871	2.0	0.0	0.5	0.0	3	1	RPL31	protein_coding	0	false	-1.35733469567981	ENSG00000071082	6160	112.0	1	3.98851248719951E-5	0	false	0	ENSG00000071082	0
91.4307896434834	7.0	0.001830507780298104	0.14285714285714285	0.0	13	2	FAM3A	protein_coding	1	false	-0.300051158428104	ENSG00000071889	60343	1.5	1	0.70037026781238	0	false	0	ENSG00000071889	2145
1384.16424847717	6.5	0.01016891874593576	0.15384615384615385	0.0	12	2	CLEC7A	protein_coding	1	false	0.76911479925963	ENSG00000172243	64581	2.0	1	0.243973297790443	0	false	0	ENSG00000172243	11916
230.073023935081	13.5	0.11533308414532781	0.07407407407407407	0.0	26	2	PDCD2	protein_coding	1	false	-0.175013741214783	ENSG00000071994	5134	2.0	1	0.665168714832621	0	false	0	ENSG00000071994	135148
156.687156428055	13.0	0.12851956723211863	0.07692307692307693	0.0	25	2	ZNF277	protein_coding	1	false	-0.517363933595669	ENSG00000198839	11179	2.5	1	0.177308773135037	0	false	0	ENSG00000198839	150600
1349.12731115339	2.0	0.0	0.5	0.0	3	1	NFATC3	protein_coding	0	false	-1.0989887126088	ENSG00000072736	4775	112.0	1	0.0233438409340593	0	false	0	ENSG00000072736	0
33.6611413483511	2.0	0.01247561456418554	0.5	0.0	3	2	NLE1	protein_coding	1	false	-0.424182889053644	ENSG00000073536	54475	12.0	1	0.649204205470104	0	false	0	ENSG00000073536	14619
559.768868072528	2.0	0.0	0.5	0.0	3	1	CLNS1A	protein_coding	0	false	-1.21289320200183	ENSG00000074201	1207	112.0	1	0.0127807345282917	0	false	0	ENSG00000074201	0
67.0372049140682	18.0	0.0	0.05555555555555555	0.0	35	1	TIPIN	protein_coding	0	false	-1.63243031956203	ENSG00000075131	54962	2.0	1	0.0105961221558168	0	false	0	ENSG00000075131	0
31.4494497939975	17.5	0.02382134926771155	0.05714285714285714	0.0	34	2	DONSON	protein_coding	1	false	-0.294443389501708	ENSG00000159147	29980	3.0	1	0.794485989527672	0	false	0	ENSG00000159147	27914
169.029750976424	11.5	0.004862579642022655	0.08695652173913043	0.0	22	2	MLH1	protein_coding	1	false	-0.236420644363179	ENSG00000076242	4292	2.5	1	0.602264680488868	0	false	0	ENSG00000076242	5698
136.068410872264	11.0	0.8938484697979017	0.09090909090909091	0.0	21	4	ZFP90	protein_coding	3	false	-0.694212422608891	ENSG00000184939	146198	2.5	1	0.222560509561726	0	false	0	ENSG00000184939	1047417
151.496507157184	2.5	0.0	0.4	0.0	4	1	GPATCH1	protein_coding	0	false	-1.62639906630332	ENSG00000076650	55094	7.0	1	0.0149420118068902	0	false	0	ENSG00000076650	0
27.4094106764017	2.0	0.008914444882514682	0.5	0.0	3	7	LGR4	protein_coding	6	false	-0.43875845571937	ENSG00000205213	55366	16.857142857142858	1	0.818196506253929	0	false	0	ENSG00000205213	10446
132.814161281921	11.5	0.3109798038241825	0.08695652173913043	0.0	22	3	POLD3	protein_coding	2	false	0.305401471110994	ENSG00000077514	10714	2.0	1	0.657320807877321	0	false	0	ENSG00000077514	364408
14.0797503172606	11.0	0.31145001817707024	0.09090909090909091	0.0	21	2	ITGAD	protein_coding	1	false	2.08727064322272	ENSG00000156886	3681	3.5	1	0.123528538167463	0	false	0	ENSG00000156886	364959
762.629168084371	2.0	0.0	0.5	0.0	3	1	UBE2K	protein_coding	0	false	-1.5426430704715	ENSG00000078140	3093	6.0	1	8.86675010706505E-4	0	false	0	ENSG00000078140	0
212.167975047693	11.0	0.0	0.09090909090909091	0.0	21	1	P2RY10	protein_coding	0	false	-1.0556688582512	ENSG00000078589	27334	3.0	1	0.00708575583360324	0	false	0	ENSG00000078589	0
23.5504305598137	10.5	0.29434906460625737	0.09523809523809523	0.0	20	3	NOCT	protein_coding	2	false	0.341587106844576	ENSG00000151014	25819	1.6666666666666667	1	0.751391711738049	0	false	0	ENSG00000151014	344920
1521.67740099697	3.0	0.002048120593340536	0.3333333333333333	0.0	5	2	NRDC	protein_coding	1	false	0.429530213211866	ENSG00000078618	4898	1.5	1	0.36702460717195	0	false	0	ENSG00000078618	2400
32.9332581631255	2.5	0.004403459275682152	0.4	0.0	4	2	CISD3	protein_coding	1	false	-0.120416209216622	ENSG00000277972	284106	2.5	1	0.937662812409757	0	false	0	ENSG00000277972	5160
364.762212745685	2.0	0.0	0.5	0.0	3	1	TNRC6C	protein_coding	0	false	-1.16874650996206	ENSG00000078687	57690	112.0	1	0.0107971396702839	0	false	0	ENSG00000078687	0
325.839338568759	2.0	0.0	0.5	0.0	3	1	KIF22	protein_coding	0	false	-1.4330972191466	ENSG00000079616	3835	6.0	1	0.0343882763457542	0	false	0	ENSG00000079616	0
801.076131251399	2.0	0.0	0.5	0.0	3	1	RBL1	protein_coding	0	false	-1.96604075326332	ENSG00000080839	5933	112.0	1	0.00343662543440471	0	false	0	ENSG00000080839	0
359.281274692571	14.0	0.0	0.07142857142857142	0.0	27	1	TCF7	protein_coding	0	false	-1.68007227191073	ENSG00000081059	6932	2.0	1	0.021565975164181	0	false	0	ENSG00000081059	0
559.763371557263	14.0	0.013294862801521753	0.07142857142857142	0.0	27	2	PCNP	protein_coding	1	false	-0.0821374503346242	ENSG00000081154	57092	2.5	1	0.852774277846132	0	false	0	ENSG00000081154	15579
42.9387437390643	13.5	0.09776020945446601	0.07407407407407407	0.0	26	4	PAPSS2	protein_coding	3	false	0.756813623641069	ENSG00000198682	9060	2.25	1	0.304086662406807	0	false	0	ENSG00000198682	114556
177.650313245889	18.5	1.477227459152795	0.05405405405405406	0.0	36	4	TRAF5	protein_coding	3	false	-0.809496868330767	ENSG00000082512	7188	2.0	1	0.0539591223636996	0	false	0	ENSG00000082512	1731024
8.92886894053408	18.0	1.460147840171496	0.05555555555555555	0.0	35	2	TNFRSF11A	protein_coding	1	false	-0.832531542889808	ENSG00000141655	8792	3.5	1	0.705601231996251	0	false	0	ENSG00000141655	1711010
2588.43084368538	2.0	0.0	0.5	0.0	3	1	XPO1	protein_coding	0	false	-1.00522619063095	ENSG00000082898	7514	112.0	1	0.0497479267535129	0	false	0	ENSG00000082898	0
35.7806610729553	7.0	0.213781120765724	0.14285714285714285	0.0	13	2	BCKDHB	protein_coding	1	false	-1.13327219806038	ENSG00000083123	594	3.0	1	0.027624414618637	0	false	0	ENSG00000083123	250510
258.168825619265	3.5	0.0	0.2857142857142857	0.0	6	1	TDRD3	protein_coding	0	false	-1.12415019300991	ENSG00000083544	81550	5.0	1	0.0194143050328819	0	false	0	ENSG00000083544	0
1558.42756945302	3.0	0.47617523719796623	0.3333333333333333	0.0	5	5	PTMA	protein_coding	4	false	-0.601898953035083	ENSG00000187514	5757	1.6	1	0.0294365656693333	0	false	0	ENSG00000187514	557985
29.5697132724303	23.5	0.9484948873789688	0.0425531914893617	0.0	46	3	NUFIP1	protein_coding	2	false	-0.715967936950899	ENSG00000083635	26747	2.3333333333333335	1	0.410678301148509	0	false	0	ENSG00000083635	1111452
16.5180972844808	23.0	1.0123220055196849	0.043478260869565216	0.0	45	3	MAP1LC3B2	protein_coding	2	false	1.25484428258914	ENSG00000258102	643246	3.0	1	0.330394243299473	0	false	0	ENSG00000258102	1186245
1343.881244591	2.0	0.0	0.5	0.0	3	1	RPS5	protein_coding	0	false	-1.01544838840193	ENSG00000083845	6193	22.0	1	0.0286304855290471	0	false	0	ENSG00000083845	0
121.047526137359	14.5	0.018160002594286084	0.06896551724137931	0.0	28	2	PREP	protein_coding	1	false	-0.201592358142405	ENSG00000085377	5550	1.5	1	0.757106867792252	0	false	0	ENSG00000085377	21280
28.4880007957023	14.0	0.03578322691640084	0.07142857142857142	0.0	27	2	ISYNA1	protein_coding	1	false	0.427206650782326	ENSG00000105655	51477	2.0	1	0.554799467677836	0	false	0	ENSG00000105655	41931
214.993699578991	1.5	0.00156681225390551	0.6666666666666666	0.0	2	2	ATG16L1	protein_coding	1	false	-0.419034328048763	ENSG00000085978	55054	7.5	1	0.330110634317261	0	false	0	ENSG00000085978	1836
1159.50791844934	19.0	0.0	0.05263157894736842	0.0	37	1	ZFAND6	protein_coding	0	false	-1.07406047298698	ENSG00000086666	54469	4.0	1	0.0115294078677823	0	false	0	ENSG00000086666	0
61.9261978858751	8.5	0.03398514771216396	0.11764705882352941	0.0	16	2	ACOX3	protein_coding	1	false	0.21211182163089	ENSG00000087008	8310	2.0	1	0.734764467455819	0	false	0	ENSG00000087008	39824
10.7691421529652	8.0	0.04196087065606423	0.1250	0.0	15	2	MTSS2	protein_coding	1	false	0.573537922320489	ENSG00000132613	92154	3.0	1	0.740900934334717	0	false	0	ENSG00000132613	49170
700.033858999403	2.0	0.0	0.5	0.0	3	1	TXNDC16	protein_coding	0	false	-1.80049122390656	ENSG00000087301	57544	5.0	1	0.0182310006738977	0	false	0	ENSG00000087301	0
36.2396057106261	1.5	0.19564501291169356	0.6666666666666666	0.0	2	5	CCL3	protein_coding	4	false	0.47663552462941	ENSG00000277632	6348	1.8	1	0.749023352724437	0	false	0	ENSG00000277632	229258
6102.01149130105	19.0	0.577604996048834	0.05263157894736842	0.0	37	3	GNAS	protein_coding	2	false	-0.329698510868965	ENSG00000087460	2778	2.3333333333333335	1	0.669935910089959	0	false	0	ENSG00000087460	676841
213.468580696561	18.5	0.5861106701962612	0.05405405405405406	0.0	36	2	H4C6	protein_coding	1	false	-0.695851191426531	ENSG00000274618	8361	5.5	1	0.374820985837461	0	false	0	ENSG00000274618	686808
391.877659614219	13.0	0.0	0.07692307692307693	0.0	25	1	AURKA	protein_coding	0	false	-2.1050357448078	ENSG00000087586	6790	7.0	1	0.00648688905607864	0	false	0	ENSG00000087586	0
1385.68935573467	7.0	0.0	0.14285714285714285	0.0	13	1	PTPN4	protein_coding	0	false	-1.23759971030064	ENSG00000088179	5775	2.0	1	0.0126104796523037	0	false	0	ENSG00000088179	0
20.5503594224985	4.5	0.061047647818836905	0.2222222222222222	0.0	8	3	C3orf18	protein_coding	2	false	0.115559671816775	ENSG00000088543	51161	6.333333333333333	1	0.925402347463111	0	false	0	ENSG00000088543	71536
8.93009992972645	2.5	0.0035807975040237036	0.4	0.0	4	2	KIF9	protein_coding	1	false	0.528039534466343	ENSG00000088727	64147	3.0	1	0.708113882025899	0	false	0	ENSG00000088727	4196
334.116398426857	2.0	0.01565020148386337	0.5	0.0	3	5	SSX2IP	protein_coding	4	false	0.386698079847835	ENSG00000117155	117178	5.6	1	0.646131504809285	0	false	0	ENSG00000117155	18339
1603.35042593536	13.0	0.0	0.07692307692307693	0.0	25	1	TESC	protein_coding	0	false	-2.19884799255596	ENSG00000088992	54997	2.0	1	0.019721320383239	0	false	0	ENSG00000088992	0
111.319223561798	12.5	0.015934378216189368	0.08	0.0	24	2	DYNLT3	protein_coding	1	false	-0.235267898036554	ENSG00000165169	6990	1.5	1	0.801866973982615	0	false	0	ENSG00000165169	18672
1912.90815625868	2.5	0.0	0.4	0.0	4	1	RPL6	protein_coding	0	false	-1.119212208446	ENSG00000089009	6128	3.0	1	5.51232775744034E-4	0	false	0	ENSG00000089009	0
90.2479104016612	2.0	0.0021505266230075625	0.5	0.0	3	3	MRPS21	protein_coding	2	false	-0.547874404243944	ENSG00000266472	54460	2.0	1	0.380482125683084	0	false	0	ENSG00000266472	2520
33.7274402050275	21.0	0.0	0.047619047619047616	0.0	41	1	SIRPG	protein_coding	0	false	-1.54851500560997	ENSG00000089012	55423	2.0	1	0.0177424529989686	0	false	0	ENSG00000089012	0
108.641994298781	20.5	0.026420755654092912	0.04878048780487805	0.0	40	2	SPCS2	protein_coding	1	false	-0.134274754703733	ENSG00000118363	9789	2.5	1	0.858983036533477	0	false	0	ENSG00000118363	30960
69.0687775784419	2.0	0.0	0.5	0.0	3	1	TASP1	protein_coding	0	false	-1.53401328935564	ENSG00000089123	55617	112.0	1	0.00312288370167934	0	false	0	ENSG00000089123	0
477.906834588219	15.5	0.0	0.06451612903225806	0.0	30	1	BRAP	protein_coding	0	false	-1.15280337574876	ENSG00000089234	8315	2.0	1	0.028561077419047	0	false	0	ENSG00000089234	0
2380.940756005	15.0	0.01908080347770877	0.06666666666666667	0.0	29	2	UBE2H	protein_coding	1	false	-0.37428778002474	ENSG00000186591	7328	2.0	1	0.749370199651588	0	false	0	ENSG00000186591	22359
477.681971320994	1.5	0.0015958272956445008	0.6666666666666666	0.0	2	2	FUS	protein_coding	1	false	0.0981768011557	ENSG00000089280	2521	2.5	1	0.899890453876126	0	false	0	ENSG00000089280	1870
39.2768472027818	18.0	0.04029250575607225	0.05555555555555555	0.0	35	2	BIRC5	protein_coding	1	false	0.422734653072921	ENSG00000089685	332	2.0	1	0.780179859980546	0	false	0	ENSG00000089685	47215
402.324526179579	17.5	0.061424843361443784	0.05714285714285714	0.0	34	2	LAMTOR4	protein_coding	1	false	0.867717206124292	ENSG00000188186	389541	2.5	1	0.12554572544838	0	false	0	ENSG00000188186	71978
109.257681826109	7.0	0.0	0.14285714285714285	0.0	13	1	PUS7	protein_coding	0	false	-1.4741198529516	ENSG00000091127	54517	4.0	1	0.0256184167907787	0	false	0	ENSG00000091127	0
170.68622893011	6.5	0.057910609776703655	0.15384615384615385	0.0	12	4	NMD3	protein_coding	3	false	-0.435902453423304	ENSG00000169251	51068	2.25	1	0.314206439425789	0	false	0	ENSG00000169251	67860
707.65163793571	2.0	0.0	0.5	0.0	3	1	SCFD1	protein_coding	0	false	-1.23610075230509	ENSG00000092108	23256	112.0	1	0.00474889110871128	0	false	0	ENSG00000092108	0
1014.71777219122	5.0	0.0	0.2	0.0	9	1	TRPM7	protein_coding	0	false	-1.09195625012654	ENSG00000092439	54822	5.0	1	0.0115212515113243	0	false	0	ENSG00000092439	0
378.836595690366	12.5	0.04110578030834455	0.08	0.0	24	3	CBX5	protein_coding	2	false	-0.332136821384438	ENSG00000094916	23468	1.6666666666666667	1	0.43660415341313	0	false	0	ENSG00000094916	48168
38.5902601449844	12.0	0.728113698001205	0.08333333333333333	0.0	23	3	ZNF688	protein_coding	2	false	-0.510515514336807	ENSG00000229809	146542	4.333333333333333	1	0.394287532591823	0	false	0	ENSG00000229809	853208
1808.36311982519	15.0	0.0	0.06666666666666667	0.0	29	1	SUCO	protein_coding	0	false	-1.51545173448346	ENSG00000094975	51430	2.0	1	0.0199110021715598	0	false	0	ENSG00000094975	0
366.903753082299	9.0	0.0	0.1111111111111111	0.0	17	1	CRAT	protein_coding	0	false	-1.72290922544509	ENSG00000095321	1384	2.0	1	0.0267243024637392	0	false	0	ENSG00000095321	0
14.6691489636083	8.5	0.010363490202303111	0.11764705882352941	0.0	16	2	METAP1D	protein_coding	1	false	0.226007008159006	ENSG00000172878	254042	2.5	1	0.870795936972399	0	false	0	ENSG00000172878	12144
32.7144445983053	3.5	0.001961075468123563	0.2857142857142857	0.0	6	2	EFHC1	protein_coding	1	false	0.159901374474188	ENSG00000096093	114327	1.5	1	0.86660427466204	0	false	0	ENSG00000096093	2298
190.805398569848	3.0	0.004864286409183773	0.3333333333333333	0.0	5	2	ITGB3BP	protein_coding	1	false	-0.799385039939453	ENSG00000142856	23421	2.0	1	0.312041819888517	0	false	0	ENSG00000142856	5700
206.06529180131	4.5	0.0	0.2222222222222222	0.0	8	1	IFT74	protein_coding	0	false	-2.04941234136574	ENSG00000096872	80173	4.0	1	0.00320430444595058	0	false	0	ENSG00000096872	0
63.6324197587723	4.0	0.03314200473457211	0.25	0.0	7	4	TSPYL4	protein_coding	3	false	-0.16746064048449	ENSG00000187189	23270	2.0	1	0.764000217430851	0	false	0	ENSG00000187189	38836
1128.11338882251	1.5	0.0	0.6666666666666666	0.0	2	1	HNRNPM	protein_coding	0	false	-1.12379496059692	ENSG00000099783	4670	4.0	1	0.0454909287304928	0	false	0	ENSG00000099783	0
973.035097974846	10.5	5.803008347798185E-4	0.09523809523809523	0.0	20	2	CRKL	protein_coding	1	false	0.331003357353582	ENSG00000099942	1399	2.0	1	0.496697689323959	0	false	0	ENSG00000099942	680
303.359424300271	10.0	1.0459350779907255	0.1	0.0	19	3	UBL5	protein_coding	2	false	0.00890260419546283	ENSG00000198258	59286	2.3333333333333335	1	0.991720774976853	0	false	0	ENSG00000198258	1225633
797.360114385037	9.5	0.006758797958023768	0.10526315789473684	0.0	18	2	PPM1F	protein_coding	1	false	0.64428284116396	ENSG00000100034	9647	1.5	1	0.292946594380052	0	false	0	ENSG00000100034	7920
36.5414437216583	9.0	0.017263949834699602	0.1111111111111111	0.0	17	2	KCTD6	protein_coding	1	false	0.186771661159643	ENSG00000168301	200845	2.5	1	0.852607922651424	0	false	0	ENSG00000168301	20230
637.141767988256	6.0	0.0	0.16666666666666666	0.0	11	1	PIK3IP1	protein_coding	0	false	-1.33161162855657	ENSG00000100100	113791	2.0	1	2.78726242420782E-4	0	false	0	ENSG00000100100	0
55.1287700422157	5.5	0.006383309182578003	0.18181818181818182	0.0	10	2	TMEM218	protein_coding	1	false	0.587590391308585	ENSG00000150433	219854	1.5	1	0.452829331001433	0	false	0	ENSG00000150433	7480
603.405403738823	14.0	0.29783257638209737	0.07142857142857142	0.0	27	2	CCNG1	protein_coding	1	false	-0.188324676152831	ENSG00000113328	900	2.0	1	0.768454076825145	0	false	0	ENSG00000113328	349002
71.8249607785001	24.0	0.0	0.041666666666666664	0.0	47	1	DMC1	protein_coding	0	false	-1.69095172976582	ENSG00000100206	11144	3.0	1	0.0391893410583177	0	false	0	ENSG00000100206	0
56.5182545236536	23.5	0.03921638906098791	0.0425531914893617	0.0	46	3	FIGNL1	protein_coding	2	false	0.0776852772861408	ENSG00000132436	63979	1.6666666666666667	1	0.940928813109521	0	false	0	ENSG00000132436	45954
3839.77378788198	1.5	0.0	0.6666666666666666	0.0	2	1	RPL3	protein_coding	0	false	-1.20962423029012	ENSG00000100316	6122	14.0	1	5.95247765805504E-4	0	false	0	ENSG00000100316	0
2072.26263307358	32.0	0.24360090322118166	0.03125	0.0	63	2	ST13	protein_coding	1	false	-1.01778032124056	ENSG00000100380	6767	3.0	1	0.30010662539545	0	false	0	ENSG00000100380	285453
402.620064996275	31.5	0.2789932804576867	0.031746031746031744	0.0	62	2	CPNE1	protein_coding	1	false	0.347255512207735	ENSG00000214078	8904	2.0	1	0.411380404310572	0	false	0	ENSG00000214078	326926
303.847739348846	4.0	0.0	0.25	0.0	7	1	FKBP3	protein_coding	0	false	-1.93512344623764	ENSG00000100442	2287	2.0	1	7.91234544977531E-4	0	false	0	ENSG00000100442	0
152.189978363332	3.5	0.003789023097679991	0.2857142857142857	0.0	6	2	NELFB	protein_coding	1	false	0.197706456212052	ENSG00000188986	25920	2.0	1	0.725050256096283	0	false	0	ENSG00000188986	4440
355.807386236982	11.5	0.009124377243332087	0.08695652173913043	0.0	22	2	GZMH	protein_coding	1	false	-0.869196609199369	ENSG00000100450	2999	1.5	1	0.288071929118848	0	false	0	ENSG00000100450	10692
269.671819897774	11.0	0.02193537155467714	0.09090909090909091	0.0	21	2	KDELR2	protein_coding	1	false	-0.187363351689591	ENSG00000136240	11014	3.0	1	0.776725868339518	0	false	0	ENSG00000136240	25704
490.865349862809	14.5	0.0	0.06896551724137931	0.0	28	1	POLE2	protein_coding	0	false	-1.92533378265661	ENSG00000100479	5427	3.0	1	0.0199089240218491	0	false	0	ENSG00000100479	0
134.529036517712	14.0	0.06552961838393044	0.07142857142857142	0.0	27	3	RAD17	protein_coding	2	false	-0.494390717994215	ENSG00000152942	5884	1.6666666666666667	1	0.426744946892529	0	false	0	ENSG00000152942	76788
88.6485273729214	30.0	0.0	0.03333333333333333	0.0	59	1	CDKN3	protein_coding	0	false	-1.97810140697721	ENSG00000100526	1033	3.0	1	0.0146189495650863	0	false	0	ENSG00000100526	0
254.916091958576	29.5	0.4184412778224382	0.03389830508474576	0.0	58	3	PPP2R2D	protein_coding	2	false	-0.288189415536587	ENSG00000175470	55844	2.0	1	0.503369549270199	0	false	0	ENSG00000175470	490332
606.959399116225	5.0	0.011482276076415379	0.2	0.0	9	2	TMED8	protein_coding	1	false	1.4080143636029	ENSG00000100580	283578	3.5	1	0.00146344883503993	0	false	0	ENSG00000100580	13455
238.124114379464	2.0	0.0	0.5	0.0	3	1	CEP128	protein_coding	0	false	-1.39484710301454	ENSG00000100629	145508	112.0	1	0.0268257621311992	0	false	0	ENSG00000100629	0
1280.12385090408	2.0	0.08591609873989381	0.5	0.0	3	4	SRSF5	protein_coding	3	false	-0.290418342410587	ENSG00000100650	6430	6.75	1	0.12522698034934	0	false	0	ENSG00000100650	100677
2328.42212149517	2.5	0.0	0.4	0.0	4	1	VRK1	protein_coding	0	false	-1.80306296849302	ENSG00000100749	7443	7.0	1	0.0308311758756692	0	false	0	ENSG00000100749	0
1206.37520922734	2.0	0.012135114515542675	0.5	0.0	3	7	BRD2	protein_coding	6	false	0.513124353270225	ENSG00000204256	6046	4.285714285714286	1	0.00120575090011968	0	false	0	ENSG00000204256	14220
589.833808907273	4.0	0.0	0.25	0.0	7	1	PNN	protein_coding	0	false	-1.00394707726699	ENSG00000100941	5411	4.0	1	0.0206908976736825	0	false	0	ENSG00000100941	0
35.8638437034768	3.5	0.04135155477954542	0.2857142857142857	0.0	6	4	NFKBIL1	protein_coding	3	false	0.20908300520539	ENSG00000204498	4795	2.0	1	0.853689505123824	0	false	0	ENSG00000204498	48456
1240.28266986384	2.0	0.0	0.5	0.0	3	1	ZMYND8	protein_coding	0	false	-1.33509626024823	ENSG00000101040	23613	112.0	1	0.0468663083234453	0	false	0	ENSG00000101040	0
287.156015991233	4.0	0.0	0.25	0.0	7	1	USP14	protein_coding	0	false	-1.26882944501427	ENSG00000101557	9097	6.0	1	0.0170315044655625	0	false	0	ENSG00000101557	0
737.8559031937	3.5	0.03482829068975581	0.2857142857142857	0.0	6	6	ARPC4	protein_coding	5	false	0.240559281474437	ENSG00000241553	10093	1.8333333333333333	1	0.599911092037089	0	false	0	ENSG00000241553	40812
293.664116848412	2.0	0.0	0.5	0.0	3	1	RBBP8	protein_coding	0	false	-1.44516679293576	ENSG00000101773	5932	6.0	1	0.0116462811497265	0	false	0	ENSG00000101773	0
27.8400576255816	23.0	0.0	0.043478260869565216	0.0	45	1	VSIG1	protein_coding	0	false	-1.90062180662127	ENSG00000101842	340547	4.0	1	0.0249018289482844	0	false	0	ENSG00000101842	0
163.505921254208	22.5	1.0637221519603075	0.044444444444444446	0.0	44	4	SLC9A6	protein_coding	3	false	-0.141417179098677	ENSG00000198689	10479	1.75	1	0.787114733382924	0	false	0	ENSG00000198689	1246476
185.009514689291	5.5	0.06042809133935139	0.18181818181818182	0.0	10	2	SMS	protein_coding	1	false	0.347945780100134	ENSG00000102172	6611	2.5	1	0.465829824414744	0	false	0	ENSG00000102172	70810
98.0368523875482	5.0	0.06211181714379343	0.2	0.0	9	3	TKFC	protein_coding	2	false	0.0893864394356974	ENSG00000149476	26007	2.0	1	0.908278177710939	0	false	0	ENSG00000149476	72783
169.018202531975	5.5	0.6573272367610338	0.18181818181818182	0.0	10	2	GLA	protein_coding	1	false	0.689300007028333	ENSG00000102393	2717	2.5	1	0.23554235691388	0	false	0	ENSG00000102393	770260
29.4475936603424	5.0	0.5971013973302748	0.2	0.0	9	2	RDH14	protein_coding	1	false	-0.65400742503265	ENSG00000240857	57665	2.0	1	0.461018486693658	0	false	0	ENSG00000240857	699687
823.187297616187	9.5	0.25274832182118884	0.10526315789473684	0.0	18	3	INTS6	protein_coding	2	false	0.678334456247839	ENSG00000102786	26512	2.0	1	0.0900826350445167	0	false	0	ENSG00000102786	296172
13.9350564328985	9.0	0.2490796258083676	0.1111111111111111	0.0	17	2	ADAM32	protein_coding	1	false	-1.23883579287879	ENSG00000197140	203102	3.5	1	0.376099432793472	0	false	0	ENSG00000197140	291873
131.963856479764	4.0	0.0018219739444925184	0.25	0.0	7	2	VAC14	protein_coding	1	false	-0.0884871669218187	ENSG00000103043	55697	2.0	1	0.928005901329854	0	false	0	ENSG00000103043	2135
73.4320158093628	3.5	0.1600145416562127	0.2857142857142857	0.0	6	3	NUDT19	protein_coding	2	false	0.131335346713022	ENSG00000213965	390916	2.0	1	0.848267954378259	0	false	0	ENSG00000213965	187506
112.267757165033	8.0	0.1354575757420597	0.1250	0.0	15	2	HSDL1	protein_coding	1	false	0.339091270341659	ENSG00000103160	83693	2.0	1	0.614382515808821	0	false	0	ENSG00000103160	158730
210.877015857403	7.5	0.1349216508534689	0.13333333333333333	0.0	14	2	PITPNB	protein_coding	1	false	-0.531360807232526	ENSG00000180957	23760	2.0	1	0.166079725953446	0	false	0	ENSG00000180957	158102
331.831891945395	22.5	0.013893084691493302	0.044444444444444446	0.0	44	2	TSC2	protein_coding	1	false	0.148990713998959	ENSG00000103197	7249	4.0	1	0.765745497095563	0	false	0	ENSG00000103197	16280
157.000249422659	6.5	0.708557559869125	0.15384615384615385	0.0	12	2	UBFD1	protein_coding	1	false	-0.635334666127854	ENSG00000103353	56061	2.5	1	0.235079866090789	0	false	0	ENSG00000103353	830292
146.755580344223	6.0	0.7164231963311333	0.16666666666666666	0.0	11	3	ZNF622	protein_coding	2	false	0.07483694675791	ENSG00000173545	90441	2.6666666666666665	1	0.909433957513816	0	false	0	ENSG00000173545	839509
278.258008015392	18.5	0.019754123122769467	0.05405405405405406	0.0	36	2	PYCARD	protein_coding	1	false	0.546624019077087	ENSG00000103490	29108	1.5	1	0.508915445948464	0	false	0	ENSG00000103490	23148
181.874332294873	4.5	0.07337050672210246	0.2222222222222222	0.0	8	3	STX4	protein_coding	2	false	0.405429852016496	ENSG00000103496	6810	6.0	1	0.267819629570994	0	false	0	ENSG00000103496	85976
187.993956738651	21.0	0.0016794588865392394	0.047619047619047616	0.0	41	2	LACTB	protein_coding	1	false	0.42642720905053	ENSG00000103642	114294	4.5	1	0.414154946736039	0	false	0	ENSG00000103642	1968
46.9508969685575	20.5	0.19586859940979992	0.04878048780487805	0.0	40	8	TNF	protein_coding	7	false	0.160049774187841	ENSG00000232810	7124	1.6251	1	0.891858792501076	0	false	0	ENSG00000232810	229520
424.661862285247	4.0	0.0	0.25	0.0	7	1	EIF3J	protein_coding	0	false	-1.34035656403437	ENSG00000104131	8669	10.0	1	0.0473359409964773	0	false	0	ENSG00000104131	0
613.633468107453	7.5	0.0	0.13333333333333333	0.0	14	1	CSPP1	protein_coding	0	false	-1.82083354769466	ENSG00000104218	79848	10.0	1	0.0114184840583742	0	false	0	ENSG00000104218	0
424.637290009055	7.5	0.015686896977827387	0.13333333333333333	0.0	14	2	CPQ	protein_coding	1	false	0.991657698093025	ENSG00000104324	10404	2.0	1	0.0454592856801384	0	false	0	ENSG00000104324	18382
287.377548989558	7.0	0.022332194919636866	0.14285714285714285	0.0	13	2	COX7A2L	protein_coding	1	false	0.0409543830415625	ENSG00000115944	9167	2.0	1	0.933147158342991	0	false	0	ENSG00000115944	26169
81.1058691487594	13.5	0.07941075570529593	0.07407407407407407	0.0	26	2	NFKBIB	protein_coding	1	false	0.191358732008777	ENSG00000104825	4793	3.0	1	0.712018014214047	0	false	0	ENSG00000104825	93054
27.8124861386818	13.0	0.1558491763995064	0.07692307692307693	0.0	25	3	NKIRAS1	protein_coding	2	false	0.473148724542147	ENSG00000197885	28512	2.0	1	0.638205204951762	0	false	0	ENSG00000197885	182625
2142.47822673165	27.5	0.0	0.03636363636363636	0.0	54	1	LYL1	protein_coding	0	false	-1.64041448945881	ENSG00000104903	4066	2.0	1	0.0444234333495181	0	false	0	ENSG00000104903	0
83.5399251407456	27.0	0.03147961351964403	0.037037037037037035	0.0	53	2	CBFA2T3	protein_coding	1	false	0.49002738642528	ENSG00000129993	863	1.5	1	0.57346057355034	0	false	0	ENSG00000129993	36888
111.246682612113	21.5	0.03591379460422629	0.046511627906976744	0.0	42	2	SGTA	protein_coding	1	false	0.189853013925168	ENSG00000104969	6449	3.5	1	0.801585486970582	0	false	0	ENSG00000104969	42084
7.79885744417784	21.0	1.1823390561236244	0.047619047619047616	0.0	41	6	LAT	protein_coding	5	false	-0.580806144898457	ENSG00000213658	27040	1.8333333333333333	1	0.62457760810364	0	false	0	ENSG00000213658	1385472
131.892473570618	8.0	0.0	0.1250	0.0	15	1	DYRK1B	protein_coding	0	false	-1.57979999724544	ENSG00000105204	9149	3.0	1	0.0194880849493955	0	false	0	ENSG00000105204	0
424.36041541449	12.0	0.019568938885788263	0.08333333333333333	0.0	23	2	PRKD2	protein_coding	1	false	0.928296931695021	ENSG00000105287	25865	2.0	1	0.0684138596747751	0	false	0	ENSG00000105287	22931
138.583557660537	11.5	0.18881453073290289	0.08695652173913043	0.0	22	3	LONRF1	protein_coding	2	false	0.921665993117005	ENSG00000154359	91694	3.0	1	0.160043145705081	0	false	0	ENSG00000154359	221254
1988.49387469242	2.0	0.0	0.5	0.0	3	1	RPS19	protein_coding	0	false	-1.07802369772813	ENSG00000105372	6223	112.0	1	0.00761345335869261	0	false	0	ENSG00000105372	0
685.474777319397	1.5	0.0	0.6666666666666666	0.0	2	1	NOP53	protein_coding	0	false	-1.32744474240186	ENSG00000105373	29997	14.0	1	0.0022596291217227	0	false	0	ENSG00000105373	0
138.445907751032	2.5	0.0035637298324125324	0.4	0.0	4	2	TNPO2	protein_coding	1	false	0.179819416380402	ENSG00000105576	30000	4.0	1	0.809215874216538	0	false	0	ENSG00000105576	4176
66.3176759417827	8.0	0.016948197909892933	0.1250	0.0	15	2	GCDH	protein_coding	1	false	-0.360327168182658	ENSG00000105607	2639	3.0	1	0.518545853169234	0	false	0	ENSG00000105607	19860
40.8802030164211	7.5	0.22204187382553084	0.13333333333333333	0.0	14	4	MARS2	protein_coding	3	false	-0.848079500942002	ENSG00000247626	92935	2.5	1	0.209476855749627	0	false	0	ENSG00000247626	260190
1518.4537219605	2.0	0.0	0.5	0.0	3	1	RPL18A	protein_coding	0	false	-1.0713667995813	ENSG00000105640	6142	22.0	1	0.026756508298255	0	false	0	ENSG00000105640	0
149.022427662865	13.5	0.0520307969066552	0.07407407407407407	0.0	26	2	NAA30	protein_coding	1	false	-0.282640046379873	ENSG00000139977	122830	2.5	1	0.567787521615034	0	false	0	ENSG00000139977	60970
173.027490740548	4.5	0.0	0.2222222222222222	0.0	8	1	DNAJC2	protein_coding	0	false	-1.48051771231207	ENSG00000105821	27000	5.0	1	0.00301180189143251	0	false	0	ENSG00000105821	0
39.4184012253436	4.0	0.011194685809767145	0.25	0.0	7	5	HYPK	protein_coding	4	false	0.19472447223785	ENSG00000242028	25764	2.8	1	0.818745509526365	0	false	0	ENSG00000242028	13118
12206.4953702025	14.5	0.09173190784140037	0.06896551724137931	0.0	28	2	NAMPT	protein_coding	1	false	1.5393630193897	ENSG00000105835	10135	2.0	1	0.0710048789885735	0	false	0	ENSG00000105835	107492
99.0735611825905	14.0	0.10412389081469117	0.07142857142857142	0.0	27	2	USP49	protein_coding	1	false	-0.396088893449666	ENSG00000164663	25862	2.0	1	0.639964854254753	0	false	0	ENSG00000164663	122013
615.4255317468	9.0	0.0	0.1111111111111111	0.0	17	1	PALS2	protein_coding	0	false	-2.36616597497474	ENSG00000105926	51678	3.0	1	2.70005249560194E-4	0	false	0	ENSG00000105926	0
91.6918167022926	8.5	0.2691913166513911	0.11764705882352941	0.0	16	3	EIF1AD	protein_coding	2	false	-0.287309963521714	ENSG00000175376	84285	2.0	1	0.597908781879955	0	false	0	ENSG00000175376	315440
44.7665014903185	9.5	0.004946211232917394	0.10526315789473684	0.0	18	2	CAV2	protein_coding	1	false	0.240977481083913	ENSG00000105971	858	1.5	1	0.894087793919199	0	false	0	ENSG00000105971	5796
51.5768100841017	9.0	0.014478505827756472	0.1111111111111111	0.0	17	2	PLD2	protein_coding	1	false	0.282729738731389	ENSG00000129219	5338	2.5	1	0.676015097606149	0	false	0	ENSG00000129219	16966
66.6464534356299	8.0	0.05579848541482122	0.1250	0.0	15	4	HIBADH	protein_coding	3	false	-0.714102662993472	ENSG00000106049	11112	1.75	1	0.226779924401002	0	false	0	ENSG00000106049	65385
210.631194870717	7.5	0.060131113853317014	0.13333333333333333	0.0	14	2	HEXA	protein_coding	1	false	-0.247564275589076	ENSG00000213614	3073	3.0	1	0.636180135415161	0	false	0	ENSG00000213614	70462
7.73600678899488	15.5	0.068816851936242	0.06451612903225806	0.0	30	2	CHN1	protein_coding	1	false	-0.197731577969148	ENSG00000128656	1123	2.0	1	0.916185625169836	0	false	0	ENSG00000128656	80640
21.4414807858099	4.5	0.007885264284361064	0.2222222222222222	0.0	8	2	STX1A	protein_coding	1	false	1.10794129330368	ENSG00000106089	6804	8.5	1	0.270266989642351	0	false	0	ENSG00000106089	9240
748.210723446103	2.0	0.0	0.5	0.0	3	1	EIF3B	protein_coding	0	false	-1.4392125683956	ENSG00000106263	8662	112.0	1	0.0234933476354563	0	false	0	ENSG00000106263	0
118.45714992242	7.5	0.012831475517278456	0.13333333333333333	0.0	14	2	BLVRA	protein_coding	1	false	0.335869778553178	ENSG00000106605	644	2.5	1	0.637616888699186	0	false	0	ENSG00000106605	15036
11.0857416075097	7.0	0.04546315687067654	0.14285714285714285	0.0	13	4	ANKRD39	protein_coding	3	false	-0.69107976178757	ENSG00000213337	51239	2.5	1	0.643044243099749	0	false	0	ENSG00000213337	53274
527.357788830231	7.0	0.7602043341645289	0.14285714285714285	0.0	13	2	TMEM248	protein_coding	1	false	-0.206416558757852	ENSG00000106609	55069	2.0	1	0.624192238899154	0	false	0	ENSG00000106609	890812
32.499615139386	19.5	0.0	0.05128205128205128	0.0	38	1	ENG	protein_coding	0	false	-1.57138348716499	ENSG00000106991	2022	3.0	1	0.0145424810093855	0	false	0	ENSG00000106991	0
45.716156444312	19.0	1.444628206375458	0.05263157894736842	0.0	37	3	COMMD3	protein_coding	2	false	-0.0556694601255745	ENSG00000148444	23412	2.3333333333333335	1	0.961830339913841	0	false	0	ENSG00000148444	1692824
70.7304206615885	21.5	0.022042897885827518	0.046511627906976744	0.0	42	2	CREB3	protein_coding	1	false	0.121751963072221	ENSG00000107175	10488	3.5	1	0.856318631532363	0	false	0	ENSG00000107175	25830
4264.28422678122	4.0	0.0	0.25	0.0	7	1	BAG1	protein_coding	0	false	-1.90991348447978	ENSG00000107262	573	6.0	1	0.0365436110700062	0	false	0	ENSG00000107262	0
490.169406340053	15.5	1.4076732838029502	0.06451612903225806	0.0	30	2	PDLIM1	protein_coding	1	false	0.693720409036216	ENSG00000107438	9124	2.0	1	0.276869316672111	0	false	0	ENSG00000107438	1649520
36.783310942686	15.0	1.3771340989890817	0.06666666666666667	0.0	29	2	SUPT4H1	protein_coding	1	false	0.418792784119401	ENSG00000213246	6827	2.5	1	0.628751947679564	0	false	0	ENSG00000213246	1613734
3192.17639457606	29.0	0.0	0.034482758620689655	0.0	57	1	HPS1	protein_coding	0	false	-1.84186136941221	ENSG00000107521	3257	2.0	1	0.0468809109061872	0	false	0	ENSG00000107521	0
26.6845721833694	28.5	0.031541057137444255	0.03508771929824561	0.0	56	2	PSEN2	protein_coding	1	false	0.294004799834168	ENSG00000143801	5664	2.5	1	0.784956902839208	0	false	0	ENSG00000143801	36960
368.889966035727	22.5	0.0	0.044444444444444446	0.0	44	1	MAPK8	protein_coding	0	false	-1.25925713706299	ENSG00000107643	5599	7.0	1	0.0123037510480673	0	false	0	ENSG00000107643	0
799.522096194564	8.5	0.0	0.11764705882352941	0.0	16	1	SPOCK2	protein_coding	0	false	-1.00204793560761	ENSG00000107742	9806	2.0	1	0.0173611994894415	0	false	0	ENSG00000107742	0
116.98640358431	8.0	0.008410095186404575	0.1250	0.0	15	2	SLC25A16	protein_coding	1	false	-0.26264936057877	ENSG00000122912	8034	1.5	1	0.651948702673774	0	false	0	ENSG00000122912	9855
352.060294340617	9.5	0.018125867251063743	0.10526315789473684	0.0	18	2	MICU1	protein_coding	1	false	0.758145154159928	ENSG00000107745	10367	2.0	1	0.0398674748605757	0	false	0	ENSG00000107745	21240
230.360188395497	9.0	0.026621300795524175	0.1111111111111111	0.0	17	2	MICU2	protein_coding	1	false	-0.45580802335382	ENSG00000165487	221154	2.0	1	0.323278789858089	0	false	0	ENSG00000165487	31195
192.387845809073	2.0	0.0	0.5	0.0	3	1	ANKRD26	protein_coding	0	false	-1.45235738708664	ENSG00000107890	22852	112.0	1	0.0126784930227151	0	false	0	ENSG00000107890	0
115.023886801092	11.5	0.14041402757794377	0.08695652173913043	0.0	22	2	LHPP	protein_coding	1	false	-0.781806723081723	ENSG00000107902	64077	2.0	1	0.389053595432075	0	false	0	ENSG00000107902	164538
13.5327858268651	11.0	0.1457160997639541	0.09090909090909091	0.0	21	2	GDPGP1	protein_coding	1	false	0.457161605304126	ENSG00000183208	390637	2.0	1	0.7719298729104	0	false	0	ENSG00000183208	170751
493.163046738288	2.0	0.001303116727512916	0.5	0.0	3	2	SMC3	protein_coding	1	false	-0.447284703108584	ENSG00000108055	9126	56.5	1	0.166167040349466	0	false	0	ENSG00000108055	1527
1248.29232065854	2.5	0.006472061074956094	0.4	0.0	4	2	RPL28	protein_coding	1	false	-0.834977723194056	ENSG00000108107	6158	6.0	1	0.0174095366746237	0	false	0	ENSG00000108107	7584
486.574690371034	2.0	0.0012621543156461053	0.5	0.0	3	2	ZMIZ1	protein_coding	1	false	0.427387021960524	ENSG00000108175	57178	56.5	1	0.46332813713658	0	false	0	ENSG00000108175	1479
3655.68259221318	2.0	0.0	0.5	0.0	3	1	RPL19	protein_coding	0	false	-1.23186528641409	ENSG00000108298	6143	112.0	1	1.29270900387669E-4	0	false	0	ENSG00000108298	0
396.933218238194	5.0	0.0	0.2	0.0	9	1	GOSR1	protein_coding	0	false	-1.0335279093496	ENSG00000108587	9527	5.0	1	0.0296758575765882	0	false	0	ENSG00000108587	0
484.454279838065	12.5	0.0	0.08	0.0	24	1	DCUN1D4	protein_coding	0	false	-1.57650925265108	ENSG00000109184	23142	2.0	1	0.0254421310937256	0	false	0	ENSG00000109184	0
672.784653074965	12.0	0.012659945417586187	0.08333333333333333	0.0	23	2	ARL4C	protein_coding	1	false	-0.621403392383355	ENSG00000188042	10123	2.5	1	0.218405651509761	0	false	0	ENSG00000188042	14835
448.071679694976	19.0	0.0	0.05263157894736842	0.0	37	1	INPP4B	protein_coding	0	false	-1.01250463172476	ENSG00000109452	8821	2.0	1	0.045870134609386	0	false	0	ENSG00000109452	0
1407.18765651032	21.0	0.0	0.047619047619047616	0.0	41	1	RPL34	protein_coding	0	false	-1.23430205767348	ENSG00000109475	6164	8.0	1	0.00157102278005373	0	false	0	ENSG00000109475	0
35.3027409228532	9.0	6.238233973883049E-4	0.1111111111111111	0.0	17	2	SLC2A9	protein_coding	1	false	0.447755066044532	ENSG00000109667	56606	1.5	1	0.735733950260613	0	false	0	ENSG00000109667	731
97.9968643991549	8.5	0.009339429905632843	0.11764705882352941	0.0	16	2	SLC25A28	protein_coding	1	false	0.335516699156744	ENSG00000155287	81894	2.0	1	0.519817309162475	0	false	0	ENSG00000155287	10944
2066.31660093391	2.0	0.0	0.5	0.0	3	1	FBXW7	protein_coding	0	false	-1.77650992692406	ENSG00000109670	55294	112.0	1	0.00151499947069757	0	false	0	ENSG00000109670	0
1878.27734448433	4.5	0.0	0.2222222222222222	0.0	8	1	NEIL3	protein_coding	0	false	-2.68038925881992	ENSG00000109674	55247	2.0	1	2.09354878541618E-4	0	false	0	ENSG00000109674	0
109.379015474466	4.0	0.003811211070774514	0.25	0.0	7	2	HMCES	protein_coding	1	false	-0.363402712744057	ENSG00000183624	56941	1.5	1	0.372949944119536	0	false	0	ENSG00000183624	4466
35.9915284956181	4.5	0.002942466585765903	0.2222222222222222	0.0	8	2	B3GAT1	protein_coding	1	false	-0.381224408583675	ENSG00000109956	27087	8.0	1	0.760961386679599	0	false	0	ENSG00000109956	3448
3368.30533949856	3.5	0.004521226209799233	0.2857142857142857	0.0	6	2	EIF4G2	protein_coding	1	false	0.379948758227792	ENSG00000110321	1982	2.5	1	0.28828678294381	0	false	0	ENSG00000110321	5298
8.20212099237449	3.0	0.056340383988475906	0.3333333333333333	0.0	5	4	SPOUT1	protein_coding	3	false	0.950775054833378	ENSG00000198917	51490	5.25	1	0.590826541072705	0	false	0	ENSG00000198917	66020
318.727976505824	2.5	0.0	0.4	0.0	4	1	PDHX	protein_coding	0	false	-1.18445719940769	ENSG00000110435	8050	7.0	1	0.0453238040781716	0	false	0	ENSG00000110435	0
202.686219974827	8.5	0.0	0.11764705882352941	0.0	16	1	CD5	protein_coding	0	false	-1.38089667846988	ENSG00000110448	921	3.0	1	0.0140566742138979	0	false	0	ENSG00000110448	0
55.7959123602619	8.0	0.09723452516884194	0.1250	0.0	15	3	CD72	protein_coding	2	false	0.309346855086876	ENSG00000137101	971	1.6666666666666667	1	0.772879520162153	0	false	0	ENSG00000137101	113940
2323.14371610795	5.5	0.0	0.18181818181818182	0.0	10	1	SOX6	protein_coding	0	false	-1.90873531105746	ENSG00000110693	55553	4.0	1	0.0367224823083856	0	false	0	ENSG00000110693	0
144.915362640957	5.0	0.016144310577006774	0.2	0.0	9	4	NACC1	protein_coding	3	false	0.43632586890344	ENSG00000160877	112939	1.5	1	0.248675686720324	0	false	0	ENSG00000160877	18918
1542.28583824658	1.5	0.0	0.6666666666666666	0.0	2	1	RPS13	protein_coding	0	false	-1.16427669749155	ENSG00000110700	6207	14.0	1	0.00526831746306265	0	false	0	ENSG00000110700	0
1564.67930005781	4.5	0.030346320124662273	0.2222222222222222	0.0	8	2	TCIRG1	protein_coding	1	false	0.990724548509516	ENSG00000110719	10312	8.5	1	0.00660749655297588	0	false	0	ENSG00000110719	35560
1025.06229356812	2.0	0.0	0.5	0.0	3	1	CPSF6	protein_coding	0	false	-1.05240239168991	ENSG00000111605	11052	112.0	1	0.0396868765240039	0	false	0	ENSG00000111605	0
129.011677100706	17.5	0.0	0.05714285714285714	0.0	34	1	C12orf57	protein_coding	0	false	-1.07644218208753	ENSG00000111678	113246	2.0	1	0.0331386113397734	0	false	0	ENSG00000111678	0
50.1537125104827	17.0	0.01760103634902023	0.058823529411764705	0.0	33	2	ACO1	protein_coding	1	false	-0.537186619119354	ENSG00000122729	48	1.5	1	0.516614058793078	0	false	0	ENSG00000122729	20625
109.360939972262	2.0	0.0	0.5	0.0	3	1	LDHB	protein_coding	0	false	-1.37884217439514	ENSG00000111716	3945	112.0	1	1.16693952454146E-5	0	false	0	ENSG00000111716	0
186.714285294489	5.5	0.0	0.18181818181818182	0.0	10	1	KLRB1	protein_coding	0	false	-1.82523648925918	ENSG00000111796	3820	2.0	1	0.0168285079221616	0	false	0	ENSG00000111796	0
535.094593543776	5.0	0.0047772412839667995	0.2	0.0	9	2	ARL8B	protein_coding	1	false	0.00752179902917049	ENSG00000134108	55207	2.0	1	0.988777504487008	0	false	0	ENSG00000134108	5598
63.9034369596071	3.0	0.0	0.3333333333333333	0.0	5	1	PAK1IP1	protein_coding	0	false	-1.5029427425689	ENSG00000111845	55003	7.0	1	0.00168088669617464	0	false	0	ENSG00000111845	0
24.117415610066	2.5	0.3089555779710976	0.4	0.0	4	7	ZNF2	protein_coding	6	false	0.111081976775026	ENSG00000275111	7549	3.142857142857143	1	0.922624579599573	0	false	0	ENSG00000275111	362036
12060.7736468622	7.0	0.01626378427828497	0.14285714285714285	0.0	13	2	SOD2	protein_coding	1	false	1.51396508649675	ENSG00000112096	6648	2.5	1	0.0208589260867621	0	false	0	ENSG00000112096	19058
47.3145389970316	6.5	0.24077705695311338	0.15384615384615385	0.0	12	3	POGLUT3	protein_coding	2	false	-0.53522203064507	ENSG00000178202	143888	2.3333333333333335	1	0.503261541225954	0	false	0	ENSG00000178202	282144
49.5974348774136	8.5	0.1360771322215452	0.11764705882352941	0.0	16	2	SAYSD1	protein_coding	1	false	-0.235205860378014	ENSG00000112167	55776	2.0	1	0.821817058442998	0	false	0	ENSG00000112167	159456
124.80261447139	22.0	0.0	0.045454545454545456	0.0	43	1	RAB23	protein_coding	0	false	-2.56008734016975	ENSG00000112210	51715	2.0	1	0.00145544863877571	0	false	0	ENSG00000112210	0
5843.07819986321	18.5	0.0	0.05405405405405406	0.0	36	1	RPS12	protein_coding	0	false	-1.85165685338738	ENSG00000112306	6206	8.0	1	4.17434143028478E-4	0	false	0	ENSG00000112306	0
132.47018396215	7.5	0.010191106719030283	0.13333333333333333	0.0	14	2	CUTA	protein_coding	1	false	-0.443532724931018	ENSG00000112514	51596	2.0	1	0.438050215946431	0	false	0	ENSG00000112514	11942
203.908370443173	2.5	8.055941000472774E-4	0.4	0.0	4	2	CUL9	protein_coding	1	false	0.226924265443536	ENSG00000112659	23113	5.5	1	0.665168714832621	0	false	0	ENSG00000112659	944
8.77196527673998	9.0	0.06690868625011308	0.1111111111111111	0.0	17	3	LOX	protein_coding	2	false	1.35025398045663	ENSG00000113083	4015	2.3333333333333335	1	0.566075794090637	0	false	0	ENSG00000113083	78404
246.63323070767	8.5	0.0941589307445089	0.11764705882352941	0.0	16	3	PDP1	protein_coding	2	false	-0.198706091199867	ENSG00000164951	54704	3.0	1	0.777200801107537	0	false	0	ENSG00000164951	110336
747.866228255011	21.5	0.03268800466971495	0.046511627906976744	0.0	42	2	ITK	protein_coding	1	false	-0.862536809037743	ENSG00000113263	3702	3.5	1	0.13274387948267	0	false	0	ENSG00000113263	38304
335.663210402337	13.5	0.3033539681483112	0.07407407407407407	0.0	26	2	PTPA	protein_coding	1	false	-0.604749171067584	ENSG00000119383	5524	2.0	1	0.371542728253464	0	false	0	ENSG00000119383	355472
122.657630618596	1.5	0.0	0.6666666666666666	0.0	2	1	BRIX1	protein_coding	0	false	-1.27069770257333	ENSG00000113460	55299	14.0	1	0.036252826524113	0	false	0	ENSG00000113460	0
883.203959131806	2.0	0.0	0.5	0.0	3	1	RARS1	protein_coding	0	false	-2.09699337398049	ENSG00000113643	5917	112.0	1	5.6557304787602E-4	0	false	0	ENSG00000113643	0
895.332988760154	2.0	0.0	0.5	0.0	3	1	SMC4	protein_coding	0	false	-1.17490438039783	ENSG00000113810	10051	112.0	1	0.0399335841710132	0	false	0	ENSG00000113810	0
64.1995932118327	6.0	0.25880563847599347	0.16666666666666666	0.0	11	3	NIT2	protein_coding	2	false	-0.569858775040936	ENSG00000114021	56954	2.3333333333333335	1	0.339839398649925	0	false	0	ENSG00000114021	303270
88.5220667934922	5.5	0.24043228998656774	0.18181818181818182	0.0	10	2	PEDS1	protein_coding	1	false	0.0155745879947216	ENSG00000240849	387521	2.5	1	0.989328282695237	0	false	0	ENSG00000240849	281740
305.799056012995	4.5	0.0	0.2222222222222222	0.0	8	1	CEP70	protein_coding	0	false	-2.21744621883239	ENSG00000114107	80321	3.0	1	5.95247765805504E-4	0	false	0	ENSG00000114107	0
215.016897979999	4.0	0.4255235081574936	0.25	0.0	7	3	ZNF587	protein_coding	2	false	0.1662923984096	ENSG00000198466	84914	1.6666666666666667	1	0.781722438549499	0	false	0	ENSG00000198466	498631
957.3213949012	2.0	0.0	0.5	0.0	3	1	RPL24	protein_coding	0	false	-1.07438705533999	ENSG00000114391	6152	112.0	1	0.00375682096525693	0	false	0	ENSG00000114391	0
627.091957497928	4.0	0.0055973429048835725	0.25	0.0	7	2	FXR1	protein_coding	1	false	-0.3193229160232	ENSG00000114416	8087	5.5	1	0.416400182339546	0	false	0	ENSG00000114416	6559
228.566204863265	34.0	0.011835576878766622	0.029411764705882353	0.0	67	2	CISH	protein_coding	1	false	0.526083051771921	ENSG00000114737	1154	1.5	1	0.421769400102888	0	false	0	ENSG00000114737	13869
7.47630068559458	33.5	0.04534026963507611	0.029850746268656716	0.0	66	2	ETV5	protein_coding	1	false	1.20818990378274	ENSG00000244405	2119	2.5	1	0.56985029052637	0	false	0	ENSG00000244405	53130
560.174313844481	6.0	0.06087611771914463	0.16666666666666666	0.0	11	2	MAPKAPK3	protein_coding	1	false	0.425632454599191	ENSG00000114738	7867	2.0	1	0.356835754756598	0	false	0	ENSG00000114738	71335
126.519629814556	28.0	0.0	0.03571428571428571	0.0	55	1	ABHD14B	protein_coding	0	false	-1.14359859130541	ENSG00000114779	84836	9.0	1	0.0027226361932879	0	false	0	ENSG00000114779	0
308.565216410386	27.5	0.16755674574118923	0.03636363636363636	0.0	54	9	SLC22A4	protein_coding	8	false	0.592886236989403	ENSG00000197208	6583	1.2222222222222223	1	0.378384781364003	0	false	0	ENSG00000197208	196344
65.6322930189101	2.5	6.280903152910977E-4	0.4	0.0	4	2	ZBTB47	protein_coding	1	false	0.698751670823717	ENSG00000114853	92999	5.5	1	0.401618099194167	0	false	0	ENSG00000114853	736
323.20383642081	1.5	0.026110124030769597	0.6666666666666666	0.0	2	3	NEK4	protein_coding	2	false	-1.05051480198878	ENSG00000114904	6787	3.6666666666666665	1	0.0364313042365166	0	false	0	ENSG00000114904	30596
105.366470834597	5.0	0.004331775054915233	0.2	0.0	9	2	DGUOK	protein_coding	1	false	-0.0893414782449749	ENSG00000114956	1716	1.5	1	0.855280028274743	0	false	0	ENSG00000114956	5076
451.718381755021	18.5	0.06027618906201197	0.05405405405405406	0.0	36	3	ZAP70	protein_coding	2	false	-0.725402116797035	ENSG00000115085	7535	1.6666666666666667	1	0.235079866090789	0	false	0	ENSG00000115085	70632
16.6840656653972	18.0	0.10767567327697589	0.05555555555555555	0.0	35	3	KIT	protein_coding	2	false	0.814219658783416	ENSG00000157404	3815	2.6666666666666665	1	0.695635669794384	0	false	0	ENSG00000157404	126175
1671.32021068791	13.5	0.0	0.07407407407407407	0.0	26	1	RPS15	protein_coding	0	false	-1.43197729848785	ENSG00000115268	6209	4.0	1	4.39857931505994E-4	0	false	0	ENSG00000115268	0
86.1868326141177	13.0	0.6283249957757513	0.07692307692307693	0.0	25	4	H4C9	protein_coding	3	false	-0.452858175692692	ENSG00000276180	8294	3.25	1	0.605559428462241	0	false	0	ENSG00000276180	736275
249.498265050615	12.0	0.006025741462323968	0.08333333333333333	0.0	23	2	CLIP4	protein_coding	1	false	-0.197767270866483	ENSG00000115295	79745	1.5	1	0.751391711738049	0	false	0	ENSG00000115295	7061
427.36195670184	11.5	0.016765573823653405	0.08695652173913043	0.0	22	2	MAP7D1	protein_coding	1	false	0.275027704495321	ENSG00000116871	55700	2.0	1	0.564380437960568	0	false	0	ENSG00000116871	19646
324.546703393252	31.0	0.0	0.03225806451612903	0.0	61	1	FANCL	protein_coding	0	false	-1.51747685096284	ENSG00000115392	55120	2.0	1	0.0365436110700062	0	false	0	ENSG00000115392	0
92.2602230336294	30.5	0.029902560662771825	0.03278688524590164	0.0	60	2	FAAP100	protein_coding	1	false	-0.0153894490150786	ENSG00000185504	80233	2.0	1	0.987764357447136	0	false	0	ENSG00000185504	35040
42.4734075076256	1.0	7.816993597916378E-4	1.0	0.0	1	2	FN1	protein_coding	1	false	0.573137250236386	ENSG00000115414	2335	8.0	1	0.760135744889041	0	false	0	ENSG00000115414	916
167.381372371844	5.0	0.0	0.2	0.0	9	1	EHBP1	protein_coding	0	false	-1.10977382791935	ENSG00000115504	23301	3.0	1	0.0258596915758969	0	false	0	ENSG00000115504	0
2089.51900127638	4.0	0.0	0.25	0.0	7	1	ODC1	protein_coding	0	false	-1.61627897574965	ENSG00000115758	4953	10.0	1	0.0187178867849262	0	false	0	ENSG00000115758	0
175.942897952334	1.5	0.0	0.6666666666666666	0.0	2	1	NOL10	protein_coding	0	false	-1.38482415092887	ENSG00000115761	79954	3.0	1	0.00424906729433034	0	false	0	ENSG00000115761	0
139.193624062016	1.0	0.007646316881804667	1.0	0.0	1	3	NOL6	protein_coding	2	false	-0.335391030268326	ENSG00000165271	65083	7.333333333333333	1	0.70037026781238	0	false	0	ENSG00000165271	8960
245.90447733989	14.5	0.0	0.06896551724137931	0.0	28	1	DCAF17	protein_coding	0	false	-1.53601541179777	ENSG00000115827	80067	2.0	1	0.00214038167462747	0	false	0	ENSG00000115827	0
23.6432950430871	6.5	0.027772515245697665	0.15384615384615385	0.0	12	2	NAT8B	polymorphic_pseudogene	1	false	0.312312258432827	ENSG00000204872	51471	2.0	1	0.816376451326333	0	false	0	ENSG00000204872	32544
2629.09585170911	2.0	0.0	0.5	0.0	3	1	TRAK2	protein_coding	0	false	-1.60953172037247	ENSG00000115993	66008	112.0	1	0.0287153277365042	0	false	0	ENSG00000115993	0
105.330817249202	17.5	0.025214071271183112	0.05714285714285714	0.0	34	2	PCYOX1	protein_coding	1	false	-0.289036314125975	ENSG00000116005	51449	1.5	1	0.686519311116816	0	false	0	ENSG00000116005	29546
27.4567926364413	17.0	0.040637272722617905	0.058823529411764705	0.0	33	2	DYNC2LI1	protein_coding	1	false	-1.29204110132983	ENSG00000138036	51626	2.5	1	0.123168827404787	0	false	0	ENSG00000138036	47619
252.08855523783	2.0	0.0	0.5	0.0	3	1	RPL22	protein_coding	0	false	-1.20334509571086	ENSG00000116251	6146	112.0	1	4.95354088614978E-4	0	false	0	ENSG00000116251	0
237.558915126167	4.0	2.3894740255639585E-5	0.25	0.0	7	2	S100PBP	protein_coding	1	false	0.38391705871016	ENSG00000116497	64766	1.5	1	0.361948249064741	0	false	0	ENSG00000116497	28
78.499305911319	3.5	0.00294417335292702	0.2857142857142857	0.0	6	2	PCED1A	protein_coding	1	false	-0.226298671284984	ENSG00000132635	64773	2.0	1	0.75781646107648	0	false	0	ENSG00000132635	3450
2396.44608100002	2.5	0.0	0.4	0.0	4	1	SWT1	protein_coding	0	false	-2.49387511522717	ENSG00000116668	54823	2.0	1	6.75890478392132E-4	0	false	0	ENSG00000116668	0
192.3008458254	2.0	0.001456725772013456	0.5	0.0	3	2	DDX39A	protein_coding	1	false	-0.144307932604189	ENSG00000123136	10212	56.5	1	0.807758297454262	0	false	0	ENSG00000123136	1707
1680.44218862775	2.0	0.0	0.5	0.0	3	1	DNAJC6	protein_coding	0	false	-1.92447283542404	ENSG00000116675	9829	112.0	1	0.022388831945396	0	false	0	ENSG00000116675	0
407.941986174562	4.5	0.08908641874166884	0.2222222222222222	0.0	8	2	KIAA2013	protein_coding	1	false	0.515791638613813	ENSG00000116685	90231	8.5	1	0.311333335959928	0	false	0	ENSG00000116685	104392
72.4304903591033	11.0	0.02648731957337648	0.09090909090909091	0.0	21	2	GPRASP1	protein_coding	1	false	-0.745824765477401	ENSG00000198932	9737	2.0	1	0.38483578015857	0	false	0	ENSG00000198932	31038
15.3613435274385	5.5	0.0	0.18181818181818182	0.0	10	1	HPCAL4	protein_coding	0	false	-1.72185014881842	ENSG00000116983	51440	2.0	1	0.0466222181389322	0	false	0	ENSG00000116983	0
4115.25191188182	2.0	0.0	0.5	0.0	3	1	PRDX6	protein_coding	0	false	-1.79536818185917	ENSG00000117592	9588	112.0	1	0.0278505752137462	0	false	0	ENSG00000117592	0
427.098215377002	24.5	0.0	0.04081632653061224	0.0	48	1	RCAN3	protein_coding	0	false	-1.36330422675199	ENSG00000117602	11123	2.0	1	0.0179947329834369	0	false	0	ENSG00000117602	0
946.791681952342	24.0	0.022541273896873715	0.041666666666666664	0.0	47	2	PPP3R1	protein_coding	1	false	-0.280741708206257	ENSG00000221823	5534	2.0	1	0.716682615392462	0	false	0	ENSG00000221823	26414
96.5516209942502	7.0	0.021466863968950492	0.14285714285714285	0.0	13	2	CCDC12	protein_coding	1	false	0.0270749945298563	ENSG00000160799	151903	2.0	1	0.980553947564036	0	false	0	ENSG00000160799	25155
159.260898565462	2.0	1.9969175785070225E-4	0.5	0.0	3	2	MESD	protein_coding	1	false	-0.256143068488214	ENSG00000117899	23184	2.5	1	0.478943545960176	0	false	0	ENSG00000117899	234
22.8265711933678	1.5	0.004166218640286873	0.6666666666666666	0.0	2	4	MRM1	protein_coding	3	false	0.287378448777348	ENSG00000278619	79922	2.5	1	0.817377450725577	0	false	0	ENSG00000278619	4882
16.0321657428576	3.0	1.8774438772288244E-4	0.3333333333333333	0.0	5	2	KPTN	protein_coding	1	false	0.484173669476662	ENSG00000118162	11133	1.5	1	0.687493420459431	0	false	0	ENSG00000118162	220
62.7361028038638	2.5	0.00205153412766277	0.4	0.0	4	2	OTUD3	protein_coding	1	false	-0.774633977783904	ENSG00000169914	23252	3.0	1	0.205230749592959	0	false	0	ENSG00000169914	2404
1479.19711069581	2.5	0.0	0.4	0.0	4	1	RPS25	protein_coding	0	false	-1.29347360424996	ENSG00000118181	6230	3.0	1	3.36227149488811E-6	0	false	0	ENSG00000118181	0
83.8101213776133	2.0	0.02477201857645378	0.5	0.0	3	3	TSPYL2	protein_coding	2	false	0.166628204573072	ENSG00000184205	64061	8.333333333333334	1	0.908156661779891	0	false	0	ENSG00000184205	29028
489.974275015903	2.0	0.0	0.5	0.0	3	1	KIF14	protein_coding	0	false	-1.90200827150641	ENSG00000118193	9928	112.0	1	0.0202462130178963	0	false	0	ENSG00000118193	0
216.031706495643	20.0	1.4469664773861886	0.05	0.0	39	4	TM2D3	protein_coding	3	false	0.188277131493102	ENSG00000184277	80213	3.5	1	0.698045625277645	0	false	0	ENSG00000184277	1695564
415.983861096192	5.5	0.0	0.18181818181818182	0.0	10	1	ANKRD13C	protein_coding	0	false	-1.57341828003479	ENSG00000118454	81573	2.0	1	0.00583332154767504	0	false	0	ENSG00000118454	0
12.4488782919417	5.0	0.004231929175989882	0.2	0.0	9	2	CLDND2	protein_coding	1	false	0.600949938632812	ENSG00000160318	125875	2.0	1	0.731818327478342	0	false	0	ENSG00000160318	4959
842.761784580286	13.0	0.0	0.07692307692307693	0.0	25	1	AKAP7	protein_coding	0	false	-2.44059026812495	ENSG00000118507	9465	2.0	1	0.00344916445636086	0	false	0	ENSG00000118507	0
90.7543175921959	12.5	0.011244182057439541	0.08	0.0	24	2	SNRPG	protein_coding	1	false	-0.0877655238778925	ENSG00000143977	6637	2.0	1	0.901767219301066	0	false	0	ENSG00000143977	13176
439.812897045127	2.0	0.0	0.5	0.0	3	1	KLF12	protein_coding	0	false	-1.03637824455039	ENSG00000118922	11278	112.0	1	0.031460230297826	0	false	0	ENSG00000118922	0
40.5800760197025	13.0	0.3046579382594047	0.07692307692307693	0.0	25	2	DTD1	protein_coding	1	false	-0.18423080458877	ENSG00000125821	92675	2.5	1	0.805580304586377	0	false	0	ENSG00000125821	357000
90.681526477583	5.0	0.0	0.2	0.0	9	1	LTBP2	protein_coding	0	false	-2.22721266244492	ENSG00000119681	4053	3.0	1	0.0198046764254853	0	false	0	ENSG00000119681	0
27.4637359190141	4.5	0.022365476879278652	0.2222222222222222	0.0	8	3	ZBTB9	protein_coding	2	false	0.00237638893100497	ENSG00000213588	221504	2.3333333333333335	1	0.9986373962671	0	false	0	ENSG00000213588	26208
176.620879161341	5.0	0.0037173388769130727	0.2	0.0	9	2	BCL11A	protein_coding	1	false	-0.109069675407045	ENSG00000119866	53335	2.0	1	0.915184784316525	0	false	0	ENSG00000119866	4356
43.9532082525833	4.5	0.01425491932965013	0.2222222222222222	0.0	8	3	LIN52	protein_coding	2	false	-0.483530094956293	ENSG00000205659	91750	1.6666666666666667	1	0.54411459470166	0	false	0	ENSG00000205659	16704
215.977292480832	2.5	0.006301384358844382	0.4	0.0	4	3	SMNDC1	protein_coding	2	false	0.33776102987792	ENSG00000119953	10285	1.3333333333333333	1	0.408942268951842	0	false	0	ENSG00000119953	7384
11.0209953113613	2.0	0.006111079820379824	0.5	0.0	3	2	TMED2-DT	lncRNA	1	false	0.372993315966357	ENSG00000247373		12.5	1	0.775174399668789	0	false	0	ENSG00000247373	7161
98.9625059722515	7.5	0.0	0.13333333333333333	0.0	14	1	CCDC77	protein_coding	0	false	-1.24825502172116	ENSG00000120647	84318	10.0	1	0.0352238944241422	0	false	0	ENSG00000120647	0
273.050466174345	1.5	0.0	0.6666666666666666	0.0	2	1	MTRF1	protein_coding	0	false	-1.73656529345747	ENSG00000120662	9617	4.0	1	0.00457453371171203	0	false	0	ENSG00000120662	0
90.310035067774	12.0	2.159060458813148E-4	0.08333333333333333	0.0	23	2	NR2C1	protein_coding	1	false	-0.618989852769731	ENSG00000120798	7181	2.5	1	0.242497191277651	0	false	0	ENSG00000120798	253
31.5698897709624	8.5	0.0	0.11764705882352941	0.0	16	1	EPHX2	protein_coding	0	false	-1.32144456871138	ENSG00000120915	2053	4.0	1	0.021336538559062	0	false	0	ENSG00000120915	0
181.786270125052	2.0	0.0	0.5	0.0	3	1	KIF18A	protein_coding	0	false	-1.63535288971164	ENSG00000121621	81930	112.0	1	0.0317490501252838	0	false	0	ENSG00000121621	0
156.929655455718	7.5	0.28490893543811857	0.13333333333333333	0.0	14	2	DESI2	protein_coding	1	false	-0.00393469249469777	ENSG00000121644	51029	2.0	1	0.996518358689906	0	false	0	ENSG00000121644	333858
252.681073106206	7.0	0.27048248600877617	0.14285714285714285	0.0	13	2	PLIN2	protein_coding	1	false	0.517564068167264	ENSG00000147872	123	2.0	1	0.566931324759204	0	false	0	ENSG00000147872	316953
277.857221775458	12.5	0.30625547232221034	0.08	0.0	24	3	POLK	protein_coding	2	false	-0.430455963282833	ENSG00000122008	51426	1.6666666666666667	1	0.219972544714613	0	false	0	ENSG00000122008	358872
340.536688628699	12.0	0.30393682913383274	0.08333333333333333	0.0	23	2	REV1	protein_coding	1	false	-0.720171678465341	ENSG00000135945	51455	3.0	1	0.0798995877738082	0	false	0	ENSG00000135945	356155
3293.90145317755	28.5	0.0	0.03508771929824561	0.0	56	1	RPL21	protein_coding	0	false	-1.87559338510746	ENSG00000122026	6144	4.0	1	9.24296836251875E-5	0	false	0	ENSG00000122026	0
470.345350901537	28.0	0.528359643149122	0.03571428571428571	0.0	55	4	EID1	protein_coding	3	false	-0.40939056256417	ENSG00000255302	23741	1.75	1	0.501400774931988	0	false	0	ENSG00000255302	619135
358.951929373722	2.0	0.0085022606131049	0.5	0.0	3	2	FYTTD1	protein_coding	1	false	-0.153495662494853	ENSG00000122068	84248	12.0	1	0.734764467455819	0	false	0	ENSG00000122068	9963
168.762894885582	19.0	0.0	0.05263157894736842	0.0	37	1	LY9	protein_coding	0	false	-1.00361952389761	ENSG00000122224	4063	2.0	1	0.0279260048557047	0	false	0	ENSG00000122224	0
129.818432645135	18.5	0.016190393290356937	0.05405405405405406	0.0	36	2	SH2D1A	protein_coding	1	false	-0.839476375120895	ENSG00000183918	4068	2.0	1	0.196662609180774	0	false	0	ENSG00000183918	18972
2158.89900418736	2.5	0.0	0.4	0.0	4	1	RPL5	protein_coding	0	false	-1.16094587666471	ENSG00000122406	6125	7.0	1	0.00660749655297588	0	false	0	ENSG00000122406	0
727.063125582798	7.5	0.0	0.13333333333333333	0.0	14	1	CCDC18	protein_coding	0	false	-1.96394761808294	ENSG00000122483	343099	10.0	1	0.0022596291217227	0	false	0	ENSG00000122483	0
134.896356521393	28.0	0.0	0.03571428571428571	0.0	55	1	SLC25A51	protein_coding	0	false	-1.14951742605632	ENSG00000122696	92014	9.0	1	0.0269031794723291	0	false	0	ENSG00000122696	0
914.159470417083	16.5	0.03410803494776439	0.06060606060606061	0.0	32	2	CCDC69	protein_coding	1	false	0.259866974195517	ENSG00000198624	26112	2.0	1	0.596055972849873	0	false	0	ENSG00000198624	39968
432.886358633056	14.0	0.22838592736340316	0.07142857142857142	0.0	27	3	DCAF10	protein_coding	2	false	-0.551228641252182	ENSG00000122741	79269	2.0	1	0.386711020667319	0	false	0	ENSG00000122741	267624
206.533839947636	13.5	0.23148712329515295	0.07407407407407407	0.0	26	2	NKIRAS2	protein_coding	1	false	-0.324659347870918	ENSG00000168256	28511	2.5	1	0.541168324364729	0	false	0	ENSG00000168256	271258
339.094388341752	3.5	0.0	0.2857142857142857	0.0	6	1	TRIM24	protein_coding	0	false	-1.0317907009971	ENSG00000122779	8805	5.0	1	0.0355548586489307	0	false	0	ENSG00000122779	0
715.400889830625	11.0	0.0	0.09090909090909091	0.0	21	1	CCDC91	protein_coding	0	false	-1.5111725412353	ENSG00000123106	55297	3.0	1	0.00583332154767504	0	false	0	ENSG00000123106	0
918.150188021125	10.5	0.10385678175397633	0.09523809523809523	0.0	20	3	AP1G1	protein_coding	2	false	0.479738483513245	ENSG00000166747	164	1.6666666666666667	1	0.0274520753619265	0	false	0	ENSG00000166747	121700
494.284895238808	17.5	0.0	0.05714285714285714	0.0	34	1	CENPK	protein_coding	0	false	-2.51199929053216	ENSG00000123219	64105	5.0	1	6.80169243992204E-4	0	false	0	ENSG00000123219	0
78.7588123150002	17.0	0.15883175201355856	0.058823529411764705	0.0	33	5	VPS72	protein_coding	4	false	0.0180055856296789	ENSG00000163159	6944	1.8	1	0.98647809077004	0	false	0	ENSG00000163159	186120
1692.59922029784	2.0	0.0	0.5	0.0	3	1	PFDN5	protein_coding	0	false	-1.24981002574802	ENSG00000123349	5204	112.0	1	0.00424034167093145	0	false	0	ENSG00000123349	0
1584.7894323205	23.0	0.0	0.043478260869565216	0.0	45	1	STIL	protein_coding	0	false	-2.00372411309709	ENSG00000123473	6491	3.0	1	0.0197698320098458	0	false	0	ENSG00000123473	0
516.238656693048	22.5	0.03905083264635955	0.044444444444444446	0.0	44	3	SEC24C	protein_coding	2	false	0.374014907345851	ENSG00000176986	9632	1.6666666666666667	1	0.0355008600653873	0	false	0	ENSG00000176986	45760
188.994130828469	2.0	0.0	0.5	0.0	3	1	USP45	protein_coding	0	false	-1.37522350963398	ENSG00000123552	85015	3.0	1	0.0198026108405936	0	false	0	ENSG00000123552	0
684.351181223532	1.5	0.0024782259179420485	0.6666666666666666	0.0	2	3	RBMX	protein_coding	2	false	-0.720743285395853	ENSG00000147274	27316	1.6666666666666667	1	0.0361050097267471	0	false	0	ENSG00000147274	2904
533.991803697469	2.5	0.0	0.4	0.0	4	1	MXD4	protein_coding	0	false	-1.65919948344404	ENSG00000123933	10608	2.0	1	0.0107931884640384	0	false	0	ENSG00000123933	0
543.174929896493	4.5	0.0	0.2222222222222222	0.0	8	1	VAPB	protein_coding	0	false	-1.37690932487704	ENSG00000124164	9217	2.0	1	0.0168091227065484	0	false	0	ENSG00000124164	0
160.683302181986	4.0	0.0030346320124662275	0.25	0.0	7	2	GPAA1	protein_coding	1	false	0.271171798001132	ENSG00000197858	8733	1.5	1	0.684450357496176	0	false	0	ENSG00000197858	3556
521.184583259388	2.0	0.0	0.5	0.0	3	1	CSE1L	protein_coding	0	false	-1.12947786589238	ENSG00000124207	1434	112.0	1	0.0144118181493009	0	false	0	ENSG00000124207	0
45.7242957107737	8.0	0.15366024751537372	0.1250	0.0	15	4	SIRT3	protein_coding	3	false	0.437431412148094	ENSG00000142082	23410	2.75	1	0.497795508806811	0	false	0	ENSG00000142082	180060
270.094337527273	2.0	0.0	0.5	0.0	3	1	RPS10	protein_coding	0	false	-1.28174452035043	ENSG00000124614	6204	112.0	1	0.00910107034870178	0	false	0	ENSG00000124614	0
156.310260657904	9.5	0.10858623355743185	0.10526315789473684	0.0	18	2	CPNE5	protein_coding	1	false	0.679593789998221	ENSG00000124772	57699	2.0	1	0.362126298548812	0	false	0	ENSG00000124772	127242
223.368735424998	9.0	0.10985094802381964	0.1111111111111111	0.0	17	2	UROD	protein_coding	1	false	-0.325736313582953	ENSG00000126088	7389	2.0	1	0.72859920802475	0	false	0	ENSG00000126088	128724
410.348913306948	5.0	0.0019354739607068065	0.2	0.0	9	2	RAP2A	protein_coding	1	false	0.125774226199493	ENSG00000125249	5911	2.0	1	0.879364096466041	0	false	0	ENSG00000125249	2268
65.7392258625202	4.5	0.007523429646204235	0.2222222222222222	0.0	8	3	TMEM185A	protein_coding	2	false	0.980205155773806	ENSG00000269556	84548	6.333333333333333	1	0.0880252358629425	0	false	0	ENSG00000269556	8816
51.037792101063	9.5	0.1377719520125345	0.10526315789473684	0.0	18	2	AP5S1	protein_coding	1	false	-0.084778702652339	ENSG00000125843	55317	2.0	1	0.929638177138948	0	false	0	ENSG00000125843	161442
244.373781094021	9.0	0.13735720759238304	0.1111111111111111	0.0	17	2	AP5Z1	protein_coding	1	false	0.613751973594787	ENSG00000242802	9907	2.0	1	0.203948850677854	0	false	0	ENSG00000242802	160956
96.6672260303583	16.5	0.0682979947192624	0.06060606060606061	0.0	32	3	DYNLRB1	protein_coding	2	false	0.345217340534495	ENSG00000125971	83658	1.6666666666666667	1	0.550450757868749	0	false	0	ENSG00000125971	80032
1931.64880859754	16.0	0.07931176320995113	0.0625	0.0	31	2	PIK3AP1	protein_coding	1	false	1.11199626795413	ENSG00000155629	118788	3.0	1	0.022555497025228	0	false	0	ENSG00000155629	92938
51.7904788784382	8.5	0.11024350447087658	0.11764705882352941	0.0	16	2	LRATD2	protein_coding	1	false	-1.21783942485297	ENSG00000168672	157638	2.0	1	0.0562231911953439	0	false	0	ENSG00000168672	129184
8.57469569924952	2.0	0.0	0.5	0.0	3	1	LRFN3	protein_coding	0	false	-2.18142877809546	ENSG00000126243	79414	112.0	1	0.0366921905495634	0	false	0	ENSG00000126243	0
275.249650179678	2.5	0.0	0.4	0.0	4	1	CCR7	protein_coding	0	false	-1.55102084981218	ENSG00000126353	1236	2.0	1	0.00661869532042734	0	false	0	ENSG00000126353	0
14.7190231190298	3.5	0.0	0.2857142857142857	0.0	6	1	NR1D1	protein_coding	0	false	-1.86164144306899	ENSG00000126368	9572	2.0	1	0.0304094134914215	0	false	0	ENSG00000126368	0
91.6662517960138	3.0	0.002099323608174049	0.3333333333333333	0.0	5	2	C1D	protein_coding	1	false	-0.267739642897376	ENSG00000197223	10438	2.5	1	0.834488249108531	0	false	0	ENSG00000197223	2460
295.131888472148	6.5	0.09042452419598465	0.15384615384615385	0.0	12	2	FRMD8	protein_coding	1	false	0.529447137248541	ENSG00000126391	83786	2.0	1	0.157970300304836	0	false	0	ENSG00000126391	105960
13.8403730936173	6.0	0.08748888467886322	0.16666666666666666	0.0	11	2	LIME1	protein_coding	1	false	0.679598451449604	ENSG00000203896	54923	2.0	1	0.608418093445361	0	false	0	ENSG00000203896	102520
427.946463390768	8.5	0.0	0.11764705882352941	0.0	16	1	SBDS	protein_coding	0	false	-1.82831223503217	ENSG00000126524	51119	4.0	1	0.00766088450404886	0	false	0	ENSG00000126524	0
31.7051672783224	8.0	0.7404339967537289	0.1250	0.0	15	4	TYMS	protein_coding	3	false	-0.0476998170903948	ENSG00000176890	7298	2.5	1	0.978204656743904	0	false	0	ENSG00000176890	867645
1245.75825498707	12.0	0.0	0.08333333333333333	0.0	23	1	RHOT1	protein_coding	0	false	-1.0796153666857	ENSG00000126858	55288	2.0	1	0.0336075084428971	0	false	0	ENSG00000126858	0
94.80399135168	17.0	0.0	0.058823529411764705	0.0	33	1	DYNC2I1	protein_coding	0	false	-1.93112260698479	ENSG00000126870	55112	3.0	1	9.11745364056333E-5	0	false	0	ENSG00000126870	0
385.691086565864	5.5	0.0	0.18181818181818182	0.0	10	1	BCL11B	protein_coding	0	false	-1.31838920436828	ENSG00000127152	64919	2.0	1	0.0313149975665439	0	false	0	ENSG00000127152	0
2960.30894580292	13.0	0.0	0.07692307692307693	0.0	25	1	HP1BP3	protein_coding	0	false	-1.55088474047063	ENSG00000127483	50809	5.0	1	0.0103090252126603	0	false	0	ENSG00000127483	0
176.375778607355	12.5	0.1501886831096615	0.08	0.0	24	5	ISG15	protein_coding	4	false	0.160086001286217	ENSG00000187608	9636	2.0	1	0.911210322072536	0	false	0	ENSG00000187608	175992
188.853510448556	10.0	0.2508026072575153	0.1	0.0	19	2	UQCR11	protein_coding	1	false	-0.341276661155539	ENSG00000127540	10975	3.0	1	0.663061708706857	0	false	0	ENSG00000127540	293892
158.799048201524	3.5	0.0	0.2857142857142857	0.0	6	1	METTL25	protein_coding	0	false	-1.02252401869544	ENSG00000127720	84190	2.0	1	0.0438495297708232	0	false	0	ENSG00000127720	0
8.65813598725457	15.0	0.08315369608962575	0.06666666666666667	0.0	29	2	ADORA2A	protein_coding	1	false	0.221418780580435	ENSG00000128271	135	2.0	1	0.911210322072536	0	false	0	ENSG00000128271	97440
7.50156506109646	7.0	0.05241908643580934	0.14285714285714285	0.0	13	2	IGLC7	IG_C_gene	1	false	1.12552371832577	ENSG00000211685		3.0	1	0.519074611471409	0	false	0	ENSG00000211685	61425
145.382704030938	1.5	0.0015412107464887533	0.6666666666666666	0.0	2	2	NEDD8	protein_coding	1	false	5.30353571665426E-4	ENSG00000129559	4738	2.5	1	0.999224293087065	0	false	0	ENSG00000129559	1806
249.88445753093	1.0	0.10090748809956597	1.0	0.0	1	4	STRBP	protein_coding	3	false	-0.609746001536951	ENSG00000165209	55342	6.0	1	0.347707168445486	0	false	0	ENSG00000165209	118244
1290.04768855596	4.0	0.0	0.25	0.0	7	1	ASH2L	protein_coding	0	false	-1.77996204464996	ENSG00000129691	9070	10.0	1	0.0166488293450695	0	false	0	ENSG00000129691	0
16.9297650920836	5.5	0.02985135764793831	0.18181818181818182	0.0	10	2	CHRNA10	protein_coding	1	false	1.66918104019241	ENSG00000129749	57053	2.0	1	0.102537951226368	0	false	0	ENSG00000129749	34980
18.7857366048371	5.0	0.03050675623780728	0.2	0.0	9	2	DNAJC18	protein_coding	1	false	-0.486016999072838	ENSG00000170464	202052	2.0	1	0.729778965460219	0	false	0	ENSG00000170464	35748
64.1492589991403	13.0	0.0	0.07692307692307693	0.0	25	1	SGO1	protein_coding	0	false	-1.77983804536437	ENSG00000129810	151648	7.0	1	0.0123037510480673	0	false	0	ENSG00000129810	0
625.848107905874	26.5	0.06172694114896152	0.03773584905660377	0.0	52	2	GSE1	protein_coding	1	false	-1.581389321387	ENSG00000131149	23199	2.0	1	0.0126784930227151	0	false	0	ENSG00000131149	72332
741.706510910637	2.5	0.005437760175319123	0.4	0.0	4	2	RPL36	protein_coding	1	false	-0.902755410167115	ENSG00000130255	25873	6.0	1	0.00339463355223511	0	false	0	ENSG00000130255	6372
213.506886533713	9.0	0.0	0.1111111111111111	0.0	17	1	PLVAP	protein_coding	0	false	-3.19320961708054	ENSG00000130300	83483	2.0	1	9.29733151984891E-4	0	false	0	ENSG00000130300	0
34.6943260992754	8.5	0.006403790388511409	0.11764705882352941	0.0	16	2	ASGR1	protein_coding	1	false	-0.0543348735652745	ENSG00000141505	432	2.5	1	0.975089323640731	0	false	0	ENSG00000141505	7504
140.739329418194	10.0	0.10704672957810422	0.1	0.0	19	2	SNX9	protein_coding	1	false	0.208230180129264	ENSG00000130340	51429	2.5	1	0.804215383163196	0	false	0	ENSG00000130340	125438
200.973632360705	33.0	0.0	0.030303030303030304	0.0	65	1	CEP85	protein_coding	0	false	-1.15312372798721	ENSG00000130695	64793	4.0	1	0.0473215253866565	0	false	0	ENSG00000130695	0
56.5405706358166	32.5	0.22207088886726983	0.03076923076923077	0.0	64	4	ENTR1	protein_coding	3	false	-0.426435507364558	ENSG00000165689	10807	2.0	1	0.648841166661065	0	false	0	ENSG00000165689	260224
742.206069006984	2.0	0.0	0.5	0.0	3	1	DNMT1	protein_coding	0	false	-1.36569468228953	ENSG00000130816	1786	112.0	1	0.0289166098684431	0	false	0	ENSG00000130816	0
539.763267797933	2.0	0.0	0.5	0.0	3	1	ZNF236	protein_coding	0	false	-1.58718290672609	ENSG00000130856	7776	112.0	1	0.005410555870218	0	false	0	ENSG00000130856	0
75.1871847433022	26.0	0.08103901157700165	0.038461538461538464	0.0	51	2	SFMBT1	protein_coding	1	false	-0.421684752231898	ENSG00000163935	51460	3.0	1	0.538076648775125	0	false	0	ENSG00000163935	94962
46.7800309557317	2.5	0.003283820017989326	0.4	0.0	4	2	TUBG1	protein_coding	1	false	0.0587798649315296	ENSG00000131462	7283	2.0	1	0.969272395306314	0	false	0	ENSG00000131462	3848
1351.6548210004	2.0	0.21249507170982226	0.5	0.0	3	3	RPL14	protein_coding	2	false	-1.07487527325102	ENSG00000188846	9045	8.666666666666666	1	0.00576667533196827	0	false	0	ENSG00000188846	249003
69.1609543605365	14.0	0.0	0.07142857142857142	0.0	27	1	TMEM204	protein_coding	0	false	-1.45533135241069	ENSG00000131634	79652	2.0	1	0.0107931884640384	0	false	0	ENSG00000131634	0
157.829053398865	13.5	0.010184279650385814	0.07407407407407407	0.0	26	2	CIB1	protein_coding	1	false	-0.0789089701907491	ENSG00000185043	10519	1.5	1	0.903429324318769	0	false	0	ENSG00000185043	11934
74.3240080607521	3.0	0.0018945115488399956	0.3333333333333333	0.0	5	2	ZCCHC9	protein_coding	1	false	0.147155143532539	ENSG00000131732	84240	4.0	1	0.804187902197105	0	false	0	ENSG00000131732	2220
15.316058594426	5.5	0.1854573197269855	0.18181818181818182	0.0	10	2	CHD1L	protein_coding	1	false	-0.468693923389827	ENSG00000131778	9557	2.0	1	0.754133507054373	0	false	0	ENSG00000131778	217320
317.648029889491	5.0	0.1704138739688993	0.2	0.0	9	2	SCYL1	protein_coding	1	false	0.386208973972982	ENSG00000142186	57410	2.0	1	0.494249985557829	0	false	0	ENSG00000142186	199692
77.8240262098995	18.5	0.0	0.05405405405405406	0.0	36	1	SNRPA1	protein_coding	0	false	-1.04935073901253	ENSG00000131876	6627	8.0	1	0.0259768870439412	0	false	0	ENSG00000131876	0
72.3981979204852	1.5	0.0016999400924726448	0.6666666666666666	0.0	2	2	THAP1	protein_coding	1	false	0.115318431819902	ENSG00000131931	55145	2.5	1	0.907139834785269	0	false	0	ENSG00000131931	1992
1696.31666446063	23.0	0.0	0.043478260869565216	0.0	45	1	LGALS3	protein_coding	0	false	-1.87230338399703	ENSG00000131981	3958	4.0	1	0.0375174142564182	0	false	0	ENSG00000131981	0
169.68196944019	4.5	0.001208391150070916	0.2222222222222222	0.0	8	2	DCAF15	protein_coding	1	false	0.25923531968111	ENSG00000132017	90379	2.5	1	0.669085230084215	0	false	0	ENSG00000132017	1416
91.8235243537168	23.0	0.08390894055842008	0.043478260869565216	0.0	45	3	JPT2	protein_coding	2	false	-0.0261607080429084	ENSG00000206053	90861	2.0	1	0.980553947564036	0	false	0	ENSG00000206053	98325
365.243426992753	8.5	0.012124873912575973	0.11764705882352941	0.0	16	2	ZRANB2	protein_coding	1	false	0.159142735998876	ENSG00000132485	9406	2.5	1	0.741059724606212	0	false	0	ENSG00000132485	14208
123.157393183577	3.0	0.004885620998697737	0.3333333333333333	0.0	5	2	TEX10	protein_coding	1	false	-0.534329237244668	ENSG00000136891	54881	2.0	1	0.318126571840898	0	false	0	ENSG00000136891	5725
2228.43900632392	2.0	0.0	0.5	0.0	3	1	PTPRA	protein_coding	0	false	-1.6403315186242	ENSG00000132670	5786	112.0	1	0.0355008600653873	0	false	0	ENSG00000132670	0
693.640398812144	9.5	0.03294914004536587	0.10526315789473684	0.0	18	2	PDE7A	protein_coding	1	false	0.0914854746191903	ENSG00000205268	5150	2.5	1	0.894576183045656	0	false	0	ENSG00000205268	38610
85.8075823637587	2.5	0.015115129978853154	0.4	0.0	4	2	IGHMBP2	protein_coding	1	false	0.130912791008734	ENSG00000132740	3508	2.5	1	0.861445399193931	0	false	0	ENSG00000132740	17712
9788.0825029888	3.5	0.0	0.2857142857142857	0.0	6	1	RBM38	protein_coding	0	false	-2.14733167863082	ENSG00000132819	55544	2.0	1	0.0296758575765882	0	false	0	ENSG00000132819	0
337.867406539113	5.5	0.0	0.18181818181818182	0.0	10	1	CDK8	protein_coding	0	false	-1.59113055509425	ENSG00000132964	1024	4.0	1	0.0206908976736825	0	false	0	ENSG00000132964	0
12990.0926151626	23.5	0.0	0.0425531914893617	0.0	46	1	TPT1	protein_coding	0	false	-1.20810203541111	ENSG00000133112	7178	3.0	1	0.00863514392732364	0	false	0	ENSG00000133112	0
15.6982156837146	2.5	0.0	0.4	0.0	4	1	BEX2	protein_coding	0	false	-2.18456799698225	ENSG00000133134	84707	5.0	1	0.0417096477851021	0	false	0	ENSG00000133134	0
667.989936997467	10.0	0.0	0.1	0.0	19	1	SLF1	protein_coding	0	false	-1.33911851316947	ENSG00000133302	84250	2.0	1	0.0212842459974482	0	false	0	ENSG00000133302	0
125.418176921087	19.5	0.0	0.05128205128205128	0.0	38	1	LRRCC1	protein_coding	0	false	-1.80193555087267	ENSG00000133739	85444	2.0	1	0.00503648904646032	0	false	0	ENSG00000133739	0
239.726283240898	19.0	0.013861509499012634	0.05263157894736842	0.0	37	2	FBXO28	protein_coding	1	false	0.147993239096769	ENSG00000143756	23219	2.5	1	0.75664710647835	0	false	0	ENSG00000143756	16243
414.750770225689	5.5	0.22817770176974686	0.18181818181818182	0.0	10	2	HSD17B4	protein_coding	1	false	0.327185921293256	ENSG00000133835	3295	2.0	1	0.596787835571044	0	false	0	ENSG00000133835	267380
10.8588060662978	5.0	0.20871628921510899	0.2	0.0	9	2	PARS2	protein_coding	1	false	0.608863423783669	ENSG00000162396	25973	2.0	1	0.716676362949412	0	false	0	ENSG00000162396	244575
113.426953087261	20.0	0.0	0.05	0.0	39	1	CDK7	protein_coding	0	false	-1.17513440876209	ENSG00000134058	1022	4.0	1	0.0065437783879744	0	false	0	ENSG00000134058	0
44.7452410281774	19.5	0.5447027921003988	0.05128205128205128	0.0	38	4	GTF2H5	protein_coding	3	false	-0.330634978934514	ENSG00000272047	404672	2.0	1	0.699255958030952	0	false	0	ENSG00000272047	638286
91.6774909567376	10.0	0.012112073158867594	0.1	0.0	19	2	THUMPD3	protein_coding	1	false	-0.640997895858632	ENSG00000134077	25917	2.0	1	0.185127211302157	0	false	0	ENSG00000134077	14193
134.244707126317	4.5	0.016002648902634052	0.2222222222222222	0.0	8	3	TMEM14B	protein_coding	2	false	-0.897902065518114	ENSG00000137210	81853	6.333333333333333	1	0.0747683999033851	0	false	0	ENSG00000137210	18752
22.8705846119411	5.0	0.0	0.2	0.0	9	1	DPH6	protein_coding	0	false	-1.56572146261795	ENSG00000134146	89978	2.0	1	0.0342981973934765	0	false	0	ENSG00000134146	0
532.263715596853	17.5	1.56335946393857	0.05714285714285714	0.0	34	3	VAV3	protein_coding	2	false	0.742353530645573	ENSG00000134215	10451	2.3333333333333335	1	0.0294365656693333	0	false	0	ENSG00000134215	1831954
869.672139830469	17.0	1.5294878162426204	0.058823529411764705	0.0	33	2	RHOG	protein_coding	1	false	1.07365288213406	ENSG00000177105	391	2.5	1	0.0345132939880317	0	false	0	ENSG00000177105	1792263
17.057853670304	2.5	0.38366077661319364	0.4	0.0	4	2	PSRC1	protein_coding	1	false	0.80889356666451	ENSG00000134222	84722	3.5	1	0.527978295447124	0	false	0	ENSG00000134222	449576
27.6936974827312	2.0	0.28884132697733245	0.5	0.0	3	2	CDKN2AIPNL	protein_coding	1	false	-0.873131043006549	ENSG00000237190	91368	3.5	1	0.397745639095036	0	false	0	ENSG00000237190	338466
1292.56401633285	2.0	0.0	0.5	0.0	3	1	RPS15A	protein_coding	0	false	-1.02896185995115	ENSG00000134419	6210	112.0	1	0.00951968272340711	0	false	0	ENSG00000134419	0
43.596344336174	2.0	0.0	0.5	0.0	3	1	HOOK1	protein_coding	0	false	-1.60410430391756	ENSG00000134709	51361	112.0	1	0.0454592856801384	0	false	0	ENSG00000134709	0
69.5043678997942	6.0	0.08662526049533796	0.16666666666666666	0.0	11	2	SLC43A3	protein_coding	1	false	-0.0912153938340423	ENSG00000134802	29015	2.0	1	0.925195930330159	0	false	0	ENSG00000134802	101508
181.242753615889	5.5	0.08236858319551188	0.18181818181818182	0.0	10	2	MBOAT1	protein_coding	1	false	0.392481137769496	ENSG00000172197	154141	2.0	1	0.557411707656046	0	false	0	ENSG00000172197	96520
119.661133132761	9.5	0.09009170459956682	0.10526315789473684	0.0	18	2	TMEM258	protein_coding	1	false	0.126087739264091	ENSG00000134825	746	2.5	1	0.883350952569932	0	false	0	ENSG00000134825	105570
27.2973116513207	9.0	0.09120878370651797	0.1111111111111111	0.0	17	2	CCDC167	protein_coding	1	false	-0.0496914250278811	ENSG00000198937	154467	2.0	1	0.971380676752872	0	false	0	ENSG00000198937	106879
63.9359360970908	20.0	0.29075119943062244	0.05	0.0	39	2	ERCC5	protein_coding	1	false	-0.158251910608745	ENSG00000134899	2073	3.5	1	0.857527685176047	0	false	0	ENSG00000134899	340704
2069.81222134885	22.5	0.0	0.044444444444444446	0.0	44	1	ETS1	protein_coding	0	false	-1.15888320076472	ENSG00000134954	2113	7.0	1	0.00281430802139856	0	false	0	ENSG00000134954	0
31.1218213752652	5.0	0.013279501897071699	0.2	0.0	9	2	MEMO1	protein_coding	1	false	0.489019920391189	ENSG00000162959	51072	3.0	1	0.662435202938119	0	false	0	ENSG00000162959	15561
2588.93393700725	2.0	0.0	0.5	0.0	3	1	UBQLN1	protein_coding	0	false	-1.4264903366397	ENSG00000135018	29979	5.0	1	0.0268257621311992	0	false	0	ENSG00000135018	0
337.481548837778	2.0	0.0	0.5	0.0	3	1	CEP162	protein_coding	0	false	-1.17265026494862	ENSG00000135315	22832	112.0	1	0.0272409865585667	0	false	0	ENSG00000135315	0
187.511314630613	9.0	0.0	0.1111111111111111	0.0	17	1	TESPA1	protein_coding	0	false	-1.36903960399851	ENSG00000135426	9840	2.0	1	0.00701502000465194	0	false	0	ENSG00000135426	0
425.934012892977	8.5	0.005666466974908816	0.11764705882352941	0.0	16	2	KCMF1	protein_coding	1	false	0.09384642964477	ENSG00000176407	56888	1.5	1	0.89107018532842	0	false	0	ENSG00000176407	6640
53.8189053079234	2.5	0.1289838078999425	0.4	0.0	4	4	MPHOSPH6	protein_coding	3	false	-0.298415752519575	ENSG00000135698	10200	2.0	1	0.681047516829069	0	false	0	ENSG00000135698	151144
578.979471531264	2.0	0.09779519818126892	0.5	0.0	3	2	ZCCHC7	protein_coding	1	false	-1.42633794497624	ENSG00000147905	84186	13.0	1	0.00307857389895525	0	false	0	ENSG00000147905	114597
201.760668997711	28.0	0.0	0.03571428571428571	0.0	55	1	COG2	protein_coding	0	false	-1.11082284698179	ENSG00000135775	22796	9.0	1	0.0219756089987427	0	false	0	ENSG00000135775	0
942.075011830468	3.5	0.0	0.2857142857142857	0.0	6	1	PIGC	protein_coding	0	false	-3.15726698433692	ENSG00000135845	5279	2.0	1	1.16258085678089E-4	0	false	0	ENSG00000135845	0
186.181029074406	3.0	0.001749436340145041	0.3333333333333333	0.0	5	2	ZHX1	protein_coding	1	false	-0.104960400784641	ENSG00000165156	11244	2.5	1	0.894463841774673	0	false	0	ENSG00000165156	2050
65.2899335246595	3.0	0.0	0.3333333333333333	0.0	5	1	TSGA10	protein_coding	0	false	-1.57694951056648	ENSG00000135951	80705	7.0	1	0.0157389215132769	0	false	0	ENSG00000135951	0
7.74387971940204	6.0	0.2663435756430672	0.16666666666666666	0.0	11	3	EDAR	protein_coding	2	false	-1.71975929149617	ENSG00000135960	10913	2.0	1	0.318126571840898	0	false	0	ENSG00000135960	312103
41.8103039099406	5.5	0.24560379448475259	0.18181818181818182	0.0	10	2	ZNF624	protein_coding	1	false	-0.299003029424067	ENSG00000197566	57547	2.5	1	0.65647353385499	0	false	0	ENSG00000197566	287800
593.043567194531	25.0	0.009952159316473887	0.04	0.0	49	2	GCC2	protein_coding	1	false	-0.140816125294364	ENSG00000135968	9648	2.5	1	0.766911438953533	0	false	0	ENSG00000135968	11662
494.916900192028	24.5	0.036866170680129644	0.04081632653061224	0.0	48	4	BRK1	protein_coding	3	false	-0.148171876910204	ENSG00000254999	55845	1.75	1	0.810635424841254	0	false	0	ENSG00000254999	43200
352.900706502777	15.0	0.6653285612123508	0.06666666666666667	0.0	29	2	VPS36	protein_coding	1	false	-0.410830333254648	ENSG00000136100	51028	2.0	1	0.107592910181653	0	false	0	ENSG00000136100	779636
277.675316858468	14.5	0.6520157773556373	0.06896551724137931	0.0	28	2	TWF2	protein_coding	1	false	0.424562833426183	ENSG00000247596	11344	2.5	1	0.441058041814529	0	false	0	ENSG00000247596	764036
149.233451882659	2.0	0.0	0.5	0.0	3	1	TBC1D4	protein_coding	0	false	-1.34916719818606	ENSG00000136111	9882	112.0	1	0.0207171319169852	0	false	0	ENSG00000136111	0
360.7852377578	2.5	0.0	0.4	0.0	4	1	SETDB2	protein_coding	0	false	-1.60960243207412	ENSG00000136169	83852	4.0	1	6.28703185592977E-4	0	false	0	ENSG00000136169	0
67.6068037498972	10.5	0.36191997651488383	0.09523809523809523	0.0	20	4	PLCD1	protein_coding	3	false	-0.368514571610914	ENSG00000187091	5333	1.75	1	0.441394988514712	0	false	0	ENSG00000187091	424100
446.833911466099	2.0	0.004741399173583341	0.5	0.0	3	3	SRSF1	protein_coding	2	false	0.290867151034639	ENSG00000136450	6426	1.6666666666666667	1	0.425628524786733	0	false	0	ENSG00000136450	5556
348.210398907601	15.5	0.0	0.06451612903225806	0.0	30	1	BRIP1	protein_coding	0	false	-1.86586347764993	ENSG00000136492	83990	3.0	1	0.00729161865332002	0	false	0	ENSG00000136492	0
27.7315065195726	15.0	0.21681831292893192	0.06666666666666667	0.0	29	3	LIPH	protein_coding	2	false	0.299215701104283	ENSG00000163898	200879	2.0	1	0.875788609191906	0	false	0	ENSG00000163898	254069
116.74537840628	13.0	0.004650940514044134	0.07692307692307693	0.0	25	2	BLK	protein_coding	1	false	0.378420265380391	ENSG00000136573	640	3.0	1	0.771380336538237	0	false	0	ENSG00000136573	5450
552.451891929621	1.5	0.0015514513494554558	0.6666666666666666	0.0	2	2	WDR33	protein_coding	1	false	-0.350459897544236	ENSG00000136709	55339	2.5	1	0.229415816136721	0	false	0	ENSG00000136709	1818
15085.9184574846	4.5	0.0	0.2222222222222222	0.0	8	1	GYPC	protein_coding	0	false	-2.0021419034119	ENSG00000136732	2995	3.0	1	0.0366921905495634	0	false	0	ENSG00000136732	0
23.785927509926	4.0	0.008530422271263332	0.25	0.0	7	3	HRAS	protein_coding	2	false	-0.105286144104263	ENSG00000174775	3265	1.6666666666666667	1	0.924917430142991	0	false	0	ENSG00000174775	9996
422.806695601683	2.0	0.0	0.5	0.0	3	1	LRRC8A	protein_coding	0	false	-2.16339997800012	ENSG00000136802	56262	112.0	1	0.00163898589365106	0	false	0	ENSG00000136802	0
4297.21168427944	7.0	0.06330228723867261	0.14285714285714285	0.0	13	2	C9orf78	protein_coding	1	false	-0.917420859409887	ENSG00000136819	51759	2.0	1	0.583482543832555	0	false	0	ENSG00000136819	74178
10.2318414074435	6.5	0.062426715685019535	0.15384615384615385	0.0	12	2	MAPK11	protein_coding	1	false	-0.541888153410034	ENSG00000185386	5600	2.0	1	0.681674158748309	0	false	0	ENSG00000185386	73152
111.206921549283	2.0	0.0019738762218319415	0.5	0.0	3	2	ZNF189	protein_coding	1	false	0.640548153573644	ENSG00000136870	7743	12.0	1	0.22222488580565	0	false	0	ENSG00000136870	2313
229.31917557109	2.5	9.626166788700519E-4	0.4	0.0	4	2	USP20	protein_coding	1	false	-0.19199914977862	ENSG00000136878	10868	5.5	1	0.677121074084287	0	false	0	ENSG00000136878	1128
2882.36290111488	3.0	0.0	0.3333333333333333	0.0	5	1	HEMGN	protein_coding	0	false	-1.85121253825678	ENSG00000136929	55363	2.0	1	0.0263253630593815	0	false	0	ENSG00000136929	0
28.0663599153731	2.5	0.0013176242483824113	0.4	0.0	4	2	DLC1	protein_coding	1	false	-0.0924624352472517	ENSG00000164741	10395	1.5	1	0.968977669582537	0	false	0	ENSG00000164741	1544
60.0392650956156	1.5	0.0	0.6666666666666666	0.0	2	1	POLR1E	protein_coding	0	false	-1.2697499470032	ENSG00000137054	64425	14.0	1	0.00910107034870178	0	false	0	ENSG00000137054	0
2405.2136793727	4.0	0.0	0.25	0.0	7	1	UBAP2	protein_coding	0	false	-1.98243624766437	ENSG00000137073	55833	2.0	1	0.0166668885962926	0	false	0	ENSG00000137073	0
53.0094459488176	7.5	0.09829101404157344	0.13333333333333333	0.0	14	2	GRAMD1C	protein_coding	1	false	1.05788229397645	ENSG00000178075	54762	2.5	1	0.426032502876253	0	false	0	ENSG00000178075	115178
3354.25978170524	2.0	0.0	0.5	0.0	3	1	RPS6	protein_coding	0	false	-1.07565765124148	ENSG00000137154	6194	112.0	1	0.00161083246439886	0	false	0	ENSG00000137154	0
135.326117682161	5.5	0.024509176433641745	0.18181818181818182	0.0	10	2	SLC22A23	protein_coding	1	false	-0.904005652645982	ENSG00000137266	63027	2.0	1	0.38815697553602	0	false	0	ENSG00000137266	28720
976.376334768639	5.0	0.024976830635787834	0.2	0.0	9	2	PTTG1IP	protein_coding	1	false	0.635569057591896	ENSG00000183255	754	3.0	1	0.0259079865309842	0	false	0	ENSG00000183255	29268
295.067140068237	21.0	0.03379911009160219	0.047619047619047616	0.0	41	2	RIPK1	protein_coding	1	false	0.315238747699606	ENSG00000137275	8737	2.0	1	0.415319877117772	0	false	0	ENSG00000137275	39606
39.1805940082662	20.5	0.285337333995559	0.04878048780487805	0.0	40	3	PIDD1	protein_coding	2	false	0.0759013366068358	ENSG00000177595	55367	2.0	1	0.945409876677385	0	false	0	ENSG00000177595	334360
906.875354613155	7.5	0.2967368318646602	0.13333333333333333	0.0	14	2	FAM8A1	protein_coding	1	false	1.32384801838721	ENSG00000137414	51439	2.0	1	0.0515742580209644	0	false	0	ENSG00000137414	347718
15.3834863921019	7.0	0.2797126828160975	0.14285714285714285	0.0	13	2	ABHD14A	protein_coding	1	false	-0.572571863345753	ENSG00000248487	25864	2.0	1	0.685822513371926	0	false	0	ENSG00000248487	327769
194.326084863576	11.0	0.0	0.09090909090909091	0.0	21	1	FGFBP2	protein_coding	0	false	-1.49902014530729	ENSG00000137441	83888	2.0	1	0.0446950962603104	0	false	0	ENSG00000137441	0
8.38461198561531	10.5	0.006383309182578003	0.09523809523809523	0.0	20	2	ACOT11	protein_coding	1	false	0.511465793527698	ENSG00000162390	26027	1.5	1	0.788025643310115	0	false	0	ENSG00000162390	7480
137.361143149204	5.5	0.03154959097324984	0.18181818181818182	0.0	10	2	RAB30	protein_coding	1	false	-0.53527397550406	ENSG00000137502	27314	2.0	1	0.425801362108599	0	false	0	ENSG00000137502	36970
134.829644037577	5.0	0.0312517601036349	0.2	0.0	9	2	CHML	protein_coding	1	false	-0.434589836915938	ENSG00000203668	1122	3.0	1	0.431170448706211	0	false	0	ENSG00000203668	36621
685.434635983118	23.0	0.0	0.043478260869565216	0.0	45	1	NEK1	protein_coding	0	false	-1.77738813203341	ENSG00000137601	4750	2.0	1	0.0186285703868583	0	false	0	ENSG00000137601	0
1531.74461991885	1.5	0.0	0.6666666666666666	0.0	2	1	SLTM	protein_coding	0	false	-1.08718195902839	ENSG00000137776	79811	3.0	1	0.0258103528245669	0	false	0	ENSG00000137776	0
22.6736534471992	1.0	5.803008347798185E-4	1.0	0.0	1	3	AC139530.1	lncRNA	2	false	-0.72699950185108	ENSG00000262049		5.666666666666667	1	0.461209034928866	0	false	0	ENSG00000262049	680
156.001868013339	2.5	0.0	0.4	0.0	4	1	KIF23	protein_coding	0	false	-1.50470632456234	ENSG00000137807	9493	6.0	1	0.0468809109061872	0	false	0	ENSG00000137807	0
20659.8068441605	2.0	0.032467831705930844	0.5	0.0	3	6	HLA-B	protein_coding	5	false	0.526303867579491	ENSG00000234745	3106	1.5	1	0.27187694842213	0	false	0	ENSG00000234745	38046
501.220607090589	2.0	0.0	0.5	0.0	3	1	KNL1	protein_coding	0	false	-1.63991173939076	ENSG00000137812	57082	112.0	1	0.0264584341905222	0	false	0	ENSG00000137812	0
1939.74645990507	2.0	0.0	0.5	0.0	3	1	RPLP1	protein_coding	0	false	-1.04070224266922	ENSG00000137818	6176	112.0	1	0.0102403783014738	0	false	0	ENSG00000137818	0
114.755772374612	6.0	0.11497466304149322	0.16666666666666666	0.0	11	2	KYAT3	protein_coding	1	false	-0.316596154209394	ENSG00000137944	56267	2.0	1	0.46042581096378	0	false	0	ENSG00000137944	134728
108.209088996497	5.5	0.10762020334423958	0.18181818181818182	0.0	10	2	RABIF	protein_coding	1	false	0.063755392858027	ENSG00000183155	5877	2.0	1	0.92793969088805	0	false	0	ENSG00000183155	126110
758.530755482484	2.0	0.0	0.5	0.0	3	1	KIF20B	protein_coding	0	false	-1.78970593812545	ENSG00000138182	9585	112.0	1	0.00661655055997712	0	false	0	ENSG00000138182	0
640.121475396427	3.0	0.01199003930684772	0.3333333333333333	0.0	5	2	ANXA7	protein_coding	1	false	0.112500613563213	ENSG00000138279	310	2.0	1	0.89731828697293	0	false	0	ENSG00000138279	14050
107.153082123388	2.5	0.010820903801482498	0.4	0.0	4	2	C11orf54	protein_coding	1	false	0.679379462801265	ENSG00000182919	28970	3.5	1	0.300820430121487	0	false	0	ENSG00000182919	12680
2381.56436806359	1.5	0.0	0.6666666666666666	0.0	2	1	RPS24	protein_coding	0	false	-1.07485575443503	ENSG00000138326	6229	14.0	1	4.90586387636173E-4	0	false	0	ENSG00000138326	0
496.129891906077	10.0	0.0	0.1	0.0	19	1	DNA2	protein_coding	0	false	-1.79254481954113	ENSG00000138346	1763	2.0	1	0.0168049559416282	0	false	0	ENSG00000138346	0
399.04826229081	1.5	0.001570225788227744	0.6666666666666666	0.0	2	2	PPIG	protein_coding	1	false	-0.161208915376634	ENSG00000138398	9360	2.0	1	0.684560802337157	0	false	0	ENSG00000138398	1840
10.6643463335984	1.0	0.2878906576685902	1.0	0.0	1	3	AC007952.4	lncRNA	2	false	-0.531633389305505	ENSG00000262202		13.0	1	0.738752713532585	0	false	0	ENSG00000262202	337352
189.565531415744	2.5	0.0	0.4	0.0	4	1	FASTKD1	protein_coding	0	false	-1.05442596081018	ENSG00000138399	79675	6.0	1	0.0392329735462464	0	false	0	ENSG00000138399	0
169.039781483027	13.5	0.0	0.07407407407407407	0.0	26	1	OLA1	protein_coding	0	false	-1.13785555114951	ENSG00000138430	29789	3.0	1	0.0207755247172381	0	false	0	ENSG00000138430	0
692.508425480825	13.0	0.11866298687666729	0.07692307692307693	0.0	25	3	TXNRD1	protein_coding	2	false	0.530940815461294	ENSG00000198431	7296	3.3333333333333335	1	0.216635911061404	0	false	0	ENSG00000198431	139050
494.193823266075	2.5	0.0	0.4	0.0	4	1	UBL7	protein_coding	0	false	-1.366122351535	ENSG00000138629	84993	3.0	1	0.0473215253866565	0	false	0	ENSG00000138629	0
177.874648367387	2.0	0.01024060296670268	0.5	0.0	3	3	RXRB	protein_coding	2	false	0.317664903342912	ENSG00000204231	6257	3.3333333333333335	1	0.414990602483597	0	false	0	ENSG00000204231	12000
428.527628091374	2.0	0.0	0.5	0.0	3	1	FAM13A	protein_coding	0	false	-1.33998657540703	ENSG00000138640	10144	112.0	1	0.0185685139278219	0	false	0	ENSG00000138640	0
611.587166789847	2.5	0.0	0.4	0.0	4	1	LARP1B	protein_coding	0	false	-2.3684563820328	ENSG00000138709	55132	4.0	1	1.16194685261946E-4	0	false	0	ENSG00000138709	0
383.426353678937	7.0	0.0	0.14285714285714285	0.0	13	1	NUP54	protein_coding	0	false	-1.20488232709551	ENSG00000138750	53371	5.0	1	0.0308311758756692	0	false	0	ENSG00000138750	0
34.1772406695732	6.5	0.6641338241995689	0.15384615384615385	0.0	12	5	CCHCR1	protein_coding	4	false	0.227991494413008	ENSG00000204536	54535	3.4	1	0.759574116771381	0	false	0	ENSG00000204536	778236
1701.07029809565	2.0	0.0	0.5	0.0	3	1	BMP2K	protein_coding	0	false	-1.18824732037749	ENSG00000138756	55589	112.0	1	0.0412221896113334	0	false	0	ENSG00000138756	0
301.137693682776	2.0	0.0	0.5	0.0	3	1	CENPE	protein_coding	0	false	-1.38838737393254	ENSG00000138778	1062	112.0	1	0.0485827623415609	0	false	0	ENSG00000138778	0
335.859105451791	14.0	0.0	0.07142857142857142	0.0	27	1	LEF1	protein_coding	0	false	-1.14639231250025	ENSG00000138795	51176	3.0	1	0.0397204595983357	0	false	0	ENSG00000138795	0
153.044997133954	13.5	0.6285630897947271	0.07407407407407407	0.0	26	3	KMT5A	protein_coding	2	false	-0.812105648262547	ENSG00000183955	387893	2.6666666666666665	1	0.128459018368635	0	false	0	ENSG00000183955	736554
768.658128566129	2.0	0.0	0.5	0.0	3	1	SEC24B	protein_coding	0	false	-1.07667749687044	ENSG00000138802	10427	112.0	1	0.0244891234798127	0	false	0	ENSG00000138802	0
4649.13945371019	4.5	0.0	0.2222222222222222	0.0	8	1	GUCD1	protein_coding	0	false	-1.82367983884458	ENSG00000138867	83606	3.0	1	0.0361734471383333	0	false	0	ENSG00000138867	0
7.69735073741515	4.0	0.1679919713672741	0.25	0.0	7	3	HNRNPA1L2	protein_coding	2	false	-0.152920292842775	ENSG00000139675	144983	1.6666666666666667	1	0.946525871595514	0	false	0	ENSG00000139675	196854
678.688256549884	10.5	0.0173236866853387	0.09523809523809523	0.0	20	2	NUP58	protein_coding	1	false	0.425883644220472	ENSG00000139496	9818	2.0	1	0.348482303948123	0	false	0	ENSG00000139496	20300
140.453343065024	10.0	0.08963258423322631	0.1	0.0	19	3	NUP35	protein_coding	2	false	-1.60793373274907	ENSG00000163002	129401	2.0	1	0.0133017592421663	0	false	0	ENSG00000163002	105032
37.4396471113716	1.5	0.004891594683761646	0.6666666666666666	0.0	2	4	TARBP2	protein_coding	3	false	0.0832749245930529	ENSG00000139546	6895	4.25	1	0.945409876677385	0	false	0	ENSG00000139546	5732
190.819632632317	3.5	0.012672746171294566	0.2857142857142857	0.0	6	2	CSAD	protein_coding	1	false	1.52785848320171	ENSG00000139631	51380	2.0	1	0.0146125862900365	0	false	0	ENSG00000139631	14850
60.8255658251218	3.5	0.1457289005176625	0.2857142857142857	0.0	6	2	RHNO1	protein_coding	1	false	-0.480343332520282	ENSG00000171792	83695	2.5	1	0.39424924519066	0	false	0	ENSG00000171792	170766
320.130938831891	1.5	0.0031131433018776146	0.6666666666666666	0.0	2	3	MBNL2	protein_coding	2	false	0.0645333686847449	ENSG00000139793	10150	1.6666666666666667	1	0.944181474608183	0	false	0	ENSG00000139793	3648
12.8945636160208	1.0	0.0035150869683206946	1.0	0.0	1	3	SNORD3B-2	snoRNA	2	false	0.25677506041828	ENSG00000262074	780852	7.0	1	0.856672864414485	0	false	0	ENSG00000262074	4119
6337.64347524501	11.0	0.02003573970435379	0.09090909090909091	0.0	21	2	SERF2	protein_coding	1	false	-1.27451092235421	ENSG00000140264	10169	2.5	1	0.0807729573650875	0	false	0	ENSG00000140264	23478
181.809050150955	10.5	0.2583704128499086	0.09523809523809523	0.0	20	3	CWC25	protein_coding	2	false	0.630672308428683	ENSG00000273559	54883	2.0	1	0.140363927634462	0	false	0	ENSG00000273559	302760
369.45841494895	4.0	0.0	0.25	0.0	7	1	UBE2Q2	protein_coding	0	false	-1.14109603784694	ENSG00000140367	92912	6.0	1	0.00143473446508633	0	false	0	ENSG00000140367	0
88.7350326917142	4.5	0.013408362817736042	0.2222222222222222	0.0	8	2	SH2B2	protein_coding	1	false	0.628989449027412	ENSG00000160999	10603	2.0	1	0.418145793585992	0	false	0	ENSG00000160999	15712
519.612510948867	13.0	0.0	0.07692307692307693	0.0	25	1	LINS1	protein_coding	0	false	-1.8483177009455	ENSG00000140471	55180	2.0	1	0.00109721042970587	0	false	0	ENSG00000140471	0
158.775159125317	12.5	0.0066973543402235524	0.08	0.0	24	2	PLRG1	protein_coding	1	false	-0.275825292286162	ENSG00000171566	5356	2.0	1	0.621816160706039	0	false	0	ENSG00000171566	7848
74.5325173958032	2.0	0.0	0.5	0.0	3	1	ZFHX3	protein_coding	0	false	-1.43892779673458	ENSG00000140836	463	112.0	1	0.0485827623415609	0	false	0	ENSG00000140836	0
2663.36519576592	2.0	0.0	0.5	0.0	3	1	RPS2	protein_coding	0	false	-1.13767674871598	ENSG00000140988	6187	112.0	1	0.00721954712082297	0	false	0	ENSG00000140988	0
127.290631925735	13.0	0.0	0.07692307692307693	0.0	25	1	UTP4	protein_coding	0	false	-1.51796121686762	ENSG00000141076	84916	5.0	1	0.0102043259372225	0	false	0	ENSG00000141076	0
299.43415596501	10.0	0.0	0.1	0.0	19	1	PRPSAP2	protein_coding	0	false	-1.31937904666297	ENSG00000141127	5636	2.0	1	0.0307239829488223	0	false	0	ENSG00000141127	0
234.089792756946	2.0	0.0	0.5	0.0	3	1	TAF4B	protein_coding	0	false	-1.60770791294284	ENSG00000141384	6875	112.0	1	0.0155672087400806	0	false	0	ENSG00000141384	0
55.99881525062	7.0	0.009673956269211798	0.14285714285714285	0.0	13	2	C18orf21	protein_coding	1	false	0.0659516477815809	ENSG00000141428	83608	2.0	1	0.938663869221701	0	false	0	ENSG00000141428	11336
42.1839013718769	6.5	0.06548865597206363	0.15384615384615385	0.0	12	3	IGLL5	protein_coding	2	false	0.248870852459293	ENSG00000254709	100423062	2.0	1	0.916486612357111	0	false	0	ENSG00000254709	76740
311.449474964335	10.0	0.3502934786133541	0.1	0.0	19	2	DYM	protein_coding	1	false	-0.258174840083732	ENSG00000141627	54808	3.0	1	0.431170448706211	0	false	0	ENSG00000141627	410476
52.0728699016325	9.5	0.3367417473540842	0.10526315789473684	0.0	18	2	DUSP28	protein_coding	1	false	0.110668884885521	ENSG00000188542	285193	2.0	1	0.911210322072536	0	false	0	ENSG00000188542	394596
47.5646147380486	26.0	0.8150470299691246	0.038461538461538464	0.0	51	2	SAMD1	protein_coding	1	false	0.0727459280671493	ENSG00000141858	90378	4.0	1	0.948953908131079	0	false	0	ENSG00000141858	955077
130.280799823686	25.5	0.9177713717116998	0.0392156862745098	0.0	50	4	L3MBTL3	protein_coding	3	false	-0.202207856087214	ENSG00000198945	84456	1.75	1	0.712655055401345	0	false	0	ENSG00000198945	1075450
37.703881612924	2.5	0.0	0.4	0.0	4	1	TPGS1	protein_coding	0	false	-1.3376801751197	ENSG00000141933	91978	5.0	1	0.0125102142859324	0	false	0	ENSG00000141933	0
338.160365352624	4.5	0.15458531531669917	0.2222222222222222	0.0	8	2	OTULINL	protein_coding	1	false	0.495035167236697	ENSG00000145569	54491	8.5	1	0.268594398626331	0	false	0	ENSG00000145569	181144
1140.76567162644	22.5	0.09894129232995905	0.044444444444444446	0.0	44	2	CARM1	protein_coding	1	false	-2.28938555860455	ENSG00000142453	10498	3.0	1	0.0124821519764751	0	false	0	ENSG00000142453	115940
5717.3145698367	1.5	0.0	0.6666666666666666	0.0	2	1	RPS11	protein_coding	0	false	-1.31502724257886	ENSG00000142534	6205	3.0	1	0.00342674595468088	0	false	0	ENSG00000142534	0
5097.71537169519	2.0	0.0	0.5	0.0	3	1	RPL13A	protein_coding	0	false	-1.13673316740144	ENSG00000142541	23521	22.0	1	0.00105690156138731	0	false	0	ENSG00000142541	0
2457.47417215787	2.0	0.0	0.5	0.0	3	1	RPL11	protein_coding	0	false	-1.08268471333114	ENSG00000142676	6135	22.0	1	0.00184056459727755	0	false	0	ENSG00000142676	0
2657.36483453082	2.0	0.0	0.5	0.0	3	1	RPS8	protein_coding	0	false	-1.09460788398751	ENSG00000142937	6202	112.0	1	0.00444774124251216	0	false	0	ENSG00000142937	0
1625.2089397054	12.5	0.0	0.08	0.0	24	1	DCAF6	protein_coding	0	false	-1.62061622013004	ENSG00000143164	55827	2.0	1	0.0246953092824883	0	false	0	ENSG00000143164	0
269.611477033585	2.5	0.0032189628658668757	0.4	0.0	4	2	SETDB1	protein_coding	1	false	0.596452249302228	ENSG00000143379	9869	2.5	1	0.101538947891199	0	false	0	ENSG00000143379	3772
251.836850387072	4.5	0.0	0.2222222222222222	0.0	8	1	GABPB2	protein_coding	0	false	-1.30291931113712	ENSG00000143458	126626	2.0	1	0.0156998156011272	0	false	0	ENSG00000143458	0
116.860437470598	5.0	0.016651220423858557	0.2	0.0	9	2	SMYD2	protein_coding	1	false	-0.304864746742116	ENSG00000143499	56950	2.0	1	0.596567925598905	0	false	0	ENSG00000143499	19512
97.1832768026139	4.5	0.016876513689126016	0.2222222222222222	0.0	8	2	PELO	protein_coding	1	false	0.693885117814296	ENSG00000152684	53918	2.0	1	0.209373834861963	0	false	0	ENSG00000152684	19776
604.869685634314	8.0	0.0	0.1250	0.0	15	1	ACP1	protein_coding	0	false	-1.66578723622394	ENSG00000143727	52	3.0	1	0.00877377549318293	0	false	0	ENSG00000143727	0
69.6520122214726	7.5	0.70049820533433	0.13333333333333333	0.0	14	3	ADSL	protein_coding	2	false	-0.240560244204056	ENSG00000239900	158	5.0	1	0.700798322699563	0	false	0	ENSG00000239900	820848
2268.60164512872	2.0	0.0	0.5	0.0	3	1	RPS27A	protein_coding	0	false	-1.17748157592004	ENSG00000143947	6233	112.0	1	5.71467281113321E-4	0	false	0	ENSG00000143947	0
49.8504464876032	12.0	0.0343486891174819	0.08333333333333333	0.0	23	3	LSM2	protein_coding	2	false	0.121908313381875	ENSG00000204392	57819	2.6666666666666665	1	0.916486612357111	0	false	0	ENSG00000204392	40250
1350.50814794875	4.5	0.0	0.2222222222222222	0.0	8	1	LNPK	protein_coding	0	false	-2.07824291932213	ENSG00000144320	80856	15.0	1	6.48863318965332E-4	0	false	0	ENSG00000144320	0
355.582041471189	4.0	0.0	0.25	0.0	7	1	SLC25A38	protein_coding	0	false	-1.58545759708268	ENSG00000144659	54977	2.0	1	0.0413642979794121	0	false	0	ENSG00000144659	0
40.3901177754229	3.5	0.0015207295405553478	0.2857142857142857	0.0	6	2	ZSCAN16	protein_coding	1	false	0.258309985570533	ENSG00000196812	80345	1.5	1	0.745405811355251	0	false	0	ENSG00000196812	1782
2599.87493000761	18.5	0.0	0.05405405405405406	0.0	36	1	RPL32	protein_coding	0	false	-1.29111296667733	ENSG00000144713	6161	8.0	1	4.95419762871682E-4	0	false	0	ENSG00000144713	0
431.936020750552	22.0	0.0	0.045454545454545456	0.0	43	1	FIP1L1	protein_coding	0	false	-1.42758886896144	ENSG00000145216	81608	3.0	1	0.0131291032474813	0	false	0	ENSG00000145216	0
710.796058959422	21.5	0.06691722008591866	0.046511627906976744	0.0	42	3	WDR82	protein_coding	2	false	-0.231507552608628	ENSG00000164091	80335	1.6666666666666667	1	0.506415644468479	0	false	0	ENSG00000164091	78414
2366.51466418224	1.5	0.0	0.6666666666666666	0.0	2	1	RPS3A	protein_coding	0	false	-1.12391688207848	ENSG00000145425	6189	14.0	1	0.00274911100611523	0	false	0	ENSG00000145425	0
2173.964434643	2.5	0.0	0.4	0.0	4	1	RPL37	protein_coding	0	false	-1.11518408393712	ENSG00000145592	6167	3.0	1	0.00265984465977885	0	false	0	ENSG00000145592	0
7.96479802924693	2.0	0.005046057111842746	0.5	0.0	3	3	ZNF579	protein_coding	2	false	-0.0941768440177333	ENSG00000218891	163033	2.0	1	0.970564611899296	0	false	0	ENSG00000218891	5913
2566.72130195809	4.0	0.0	0.25	0.0	7	1	BTF3	protein_coding	0	false	-1.46014670096381	ENSG00000145741	689	6.0	1	0.0351035048699415	0	false	0	ENSG00000145741	0
146.381963429534	5.0	0.07738055616714712	0.2	0.0	9	2	YIPF5	protein_coding	1	false	0.152345963115934	ENSG00000145817	81555	3.5	1	0.867665064047199	0	false	0	ENSG00000145817	90675
39.9715516774796	5.5	0.0	0.18181818181818182	0.0	10	1	MYLK4	protein_coding	0	false	-2.26426240088636	ENSG00000145949	340156	3.0	1	0.0366910241213821	0	false	0	ENSG00000145949	0
203.842588936143	2.5	0.0	0.4	0.0	4	1	CDKAL1	protein_coding	0	false	-1.0138735059316	ENSG00000145996	54901	7.0	1	0.0023871936592516	0	false	0	ENSG00000145996	0
141.020090132706	3.0	0.00253028231635612	0.3333333333333333	0.0	5	2	TRIM41	protein_coding	1	false	0.600593524880851	ENSG00000146063	90933	4.5	1	0.116365970262221	0	false	0	ENSG00000146063	2965
100.576926643065	8.5	0.31786831608645116	0.11764705882352941	0.0	16	2	NFKBIE	protein_coding	1	false	0.309884566693206	ENSG00000146232	4794	2.0	1	0.659507599071566	0	false	0	ENSG00000146232	372480
12.4020831778815	8.0	0.30163696038422744	0.1250	0.0	15	2	C2orf27A	lncRNA	1	false	-0.885188568506557	ENSG00000287151		2.0	1	0.508426139912695	0	false	0	ENSG00000287151	353460
21.1666340447605	3.0	0.0	0.3333333333333333	0.0	5	1	IRAK1BP1	protein_coding	0	false	-2.05835019415889	ENSG00000146243	134728	2.0	1	0.00455129414048648	0	false	0	ENSG00000146243	0
166.923115142	2.0	0.0	0.5	0.0	3	1	MMS22L	protein_coding	0	false	-1.15143608489996	ENSG00000146263	253714	112.0	1	0.0231992220657816	0	false	0	ENSG00000146263	0
571.864769791086	2.0	0.0	0.5	0.0	3	1	GNA12	protein_coding	0	false	-1.9474019060551	ENSG00000146535	2768	112.0	1	0.0397619853929782	0	false	0	ENSG00000146535	0
97.4362259882209	10.0	0.003664429094918442	0.1	0.0	19	2	C7orf26	protein_coding	1	false	-0.126638411761779	ENSG00000146576	79034	2.0	1	0.872319067453154	0	false	0	ENSG00000146576	4294
423.377653612438	3.0	0.34571848923797965	0.3333333333333333	0.0	5	2	PURB	protein_coding	1	false	0.263012814641909	ENSG00000146676	5814	2.0	1	0.542949337023462	0	false	0	ENSG00000146676	405115
219.764847444187	2.5	0.2775237539319648	0.4	0.0	4	2	PURA	protein_coding	1	false	-0.117021007490073	ENSG00000185129	5813	2.5	1	0.847452055774353	0	false	0	ENSG00000185129	325204
305.256422479161	11.0	0.24037511328667033	0.09090909090909091	0.0	21	2	GIGYF1	protein_coding	1	false	0.186406180462955	ENSG00000146830	64599	3.5	1	0.778690747393614	0	false	0	ENSG00000146830	281673
163.093449078979	9.5	0.0	0.10526315789473684	0.0	18	1	TMEM209	protein_coding	0	false	-1.10541678826248	ENSG00000146842	84928	3.0	1	0.00214038167462747	0	false	0	ENSG00000146842	0
78.4679334573165	9.0	0.2722046140743434	0.1111111111111111	0.0	17	3	NAXD	protein_coding	2	false	0.350210921585627	ENSG00000213995	55739	2.3333333333333335	1	0.685444786748885	0	false	0	ENSG00000213995	318971
606.606861091316	27.0	0.0	0.037037037037037035	0.0	53	1	TLK2	protein_coding	0	false	-1.07513709295571	ENSG00000146872	11011	4.0	1	0.0237066373747491	0	false	0	ENSG00000146872	0
33.8820352707611	26.5	0.8189580869188244	0.03773584905660377	0.0	52	4	EID3	protein_coding	3	false	0.70307601465745	ENSG00000255150	493861	2.0	1	0.367357813974326	0	false	0	ENSG00000255150	959660
40.1256207761451	6.5	0.0917250807727559	0.15384615384615385	0.0	12	2	KRBOX4	protein_coding	1	false	-0.552147495860171	ENSG00000147121	55634	2.0	1	0.450797925808923	0	false	0	ENSG00000147121	107484
2631.08512047746	2.5	0.0	0.4	0.0	4	1	RPL7	protein_coding	0	false	-1.18506961628367	ENSG00000147604	6129	7.0	1	0.00529599396211015	0	false	0	ENSG00000147604	0
1025.05101781225	1.0	1.9798499068958514E-4	1.0	0.0	1	2	MTDH	protein_coding	1	false	-0.404523655837593	ENSG00000147649	92140	8.0	1	0.330603722940945	0	false	0	ENSG00000147649	232
796.903495394187	2.0	0.0	0.5	0.0	3	1	EIF3H	protein_coding	0	false	-1.15750767477955	ENSG00000147677	8667	112.0	1	5.32453102353087E-4	0	false	0	ENSG00000147677	0
68.9204789289608	3.5	0.0	0.2857142857142857	0.0	6	1	TATDN1	protein_coding	0	false	-1.49820206198302	ENSG00000147687	83940	5.0	1	0.00119333399038895	0	false	0	ENSG00000147687	0
396.934693984665	3.5	0.0	0.2857142857142857	0.0	6	1	HAUS6	protein_coding	0	false	-1.39642360173074	ENSG00000147874	54801	3.0	1	0.0085151643810592	0	false	0	ENSG00000147874	0
46.0594253346069	3.0	0.0021547935409103555	0.3333333333333333	0.0	5	3	HAUS5	protein_coding	2	false	-0.545643893170947	ENSG00000249115	23354	1.3333333333333333	1	0.367378847702187	0	false	0	ENSG00000249115	2525
152.492665638417	23.5	0.0	0.0425531914893617	0.0	46	1	POLE3	protein_coding	0	false	-1.01479667222461	ENSG00000148229	54107	2.0	1	0.0065437783879744	0	false	0	ENSG00000148229	0
1529.09803265546	23.0	0.010138196937035653	0.043478260869565216	0.0	45	2	BAZ1A	protein_coding	1	false	0.724265579303959	ENSG00000198604	11177	2.0	1	0.0758123194909218	0	false	0	ENSG00000198604	11880
444.452293513894	6.5	0.0	0.15384615384615385	0.0	12	1	CIZ1	protein_coding	0	false	-1.53417626456504	ENSG00000148337	25792	4.0	1	0.0327402379900947	0	false	0	ENSG00000148337	0
1131.04605277115	13.0	0.0	0.07692307692307693	0.0	25	1	RGS10	protein_coding	0	false	-1.38226960137723	ENSG00000148908	6001	2.0	1	0.0238448507769401	0	false	0	ENSG00000148908	0
298.835210556777	12.5	0.005345594748618798	0.08	0.0	24	2	PLEKHF2	protein_coding	1	false	0.273989689366304	ENSG00000175895	79666	2.0	1	0.625967885414332	0	false	0	ENSG00000175895	6264
146.479460502912	12.0	0.0	0.08333333333333333	0.0	23	1	CAPN5	protein_coding	0	false	-2.55952434048081	ENSG00000149260	726	2.0	1	0.0122792407967273	0	false	0	ENSG00000149260	0
44.7039020346515	3.0	0.0	0.3333333333333333	0.0	5	1	KAT14	protein_coding	0	false	-1.0322575417496	ENSG00000149474	57325	3.0	1	0.0257148788660806	0	false	0	ENSG00000149474	0
441.944592005937	2.5	0.011578708421018496	0.4	0.0	4	3	TADA3	protein_coding	2	false	0.409633951477266	ENSG00000171148	10474	2.0	1	0.361640648603021	0	false	0	ENSG00000171148	13568
97.0641238819367	8.5	0.09159195293418876	0.11764705882352941	0.0	16	2	MS4A3	protein_coding	1	false	2.81270470618693	ENSG00000149516	932	2.5	1	0.0894432849202454	0	false	0	ENSG00000149516	107328
216.156265969936	2.0	0.0	0.5	0.0	3	1	CCDC15	protein_coding	0	false	-1.81696985341989	ENSG00000149548	80071	112.0	1	0.0339753027521281	0	false	0	ENSG00000149548	0
16.4787534438768	24.0	0.0	0.041666666666666664	0.0	47	1	TMEM25	protein_coding	0	false	-1.86741612080483	ENSG00000149582	84866	3.0	1	0.0228275881664838	0	false	0	ENSG00000149582	0
247.718739913035	3.5	0.18241074034439148	0.2857142857142857	0.0	6	3	ZNF143	protein_coding	2	false	0.194342110731377	ENSG00000166478	7702	2.3333333333333335	1	0.667349195666402	0	false	0	ENSG00000166478	213750
54.5795079172826	5.5	0.0	0.18181818181818182	0.0	10	1	TM7SF2	protein_coding	0	false	-1.60385267641452	ENSG00000149809	7108	2.0	1	0.0321116016873979	0	false	0	ENSG00000149809	0
71.0154245087039	15.5	0.27749473889022586	0.06451612903225806	0.0	30	3	TIRAP	protein_coding	2	false	0.695100642034789	ENSG00000150455	114609	2.0	1	0.0885285254488335	0	false	0	ENSG00000150455	325170
1704.76514690989	10.0	0.29278139896877126	0.1	0.0	19	2	FCGR3A	protein_coding	1	false	0.706928560200773	ENSG00000203747	2214	3.0	1	0.483332098242055	0	false	0	ENSG00000203747	343083
864.954603770367	28.0	0.0	0.03571428571428571	0.0	55	1	CSNK1G3	protein_coding	0	false	-1.06736383875683	ENSG00000151292	1456	9.0	1	0.0216501008434179	0	false	0	ENSG00000151292	0
106.233545691062	2.0	0.0	0.5	0.0	3	1	SRFBP1	protein_coding	0	false	-1.82826178674866	ENSG00000151304	153443	112.0	1	0.00680138614389087	0	false	0	ENSG00000151304	0
2030.37008300142	7.5	0.0	0.13333333333333333	0.0	14	1	SCLT1	protein_coding	0	false	-1.43491405950623	ENSG00000151466	132320	10.0	1	0.007327921482248	0	false	0	ENSG00000151466	0
177.944184804223	7.0	0.0	0.14285714285714285	0.0	13	1	TEX9	protein_coding	0	false	-2.73800444165424	ENSG00000151575	374618	5.0	1	1.22596392160424E-4	0	false	0	ENSG00000151575	0
22.1513642222444	12.0	0.030521263758676778	0.08333333333333333	0.0	23	2	CCL28	protein_coding	1	false	-1.31559681148053	ENSG00000151882	56477	2.0	1	0.0822091668165025	0	false	0	ENSG00000151882	35765
2108.09999887955	11.5	0.03379398979011884	0.08695652173913043	0.0	22	2	CCL5	protein_coding	1	false	-0.743209095498622	ENSG00000271503	6352	2.0	1	0.141806113306614	0	false	0	ENSG00000271503	39600
193.313489722635	18.0	0.0	0.05555555555555555	0.0	35	1	MZT2B	protein_coding	0	false	-1.24836013800668	ENSG00000152082	80097	3.0	1	0.0327789756380151	0	false	0	ENSG00000152082	0
59.7068389177445	17.5	0.06452945282751582	0.05714285714285714	0.0	34	3	MZT1	protein_coding	2	false	-0.381338658757366	ENSG00000204899	440145	3.0	1	0.660553467126422	0	false	0	ENSG00000204899	75616
199.933643641727	33.5	0.0	0.029850746268656716	0.0	66	1	OBI1	protein_coding	0	false	-1.21368600583823	ENSG00000152193	79596	3.0	1	0.00701082849767928	0	false	0	ENSG00000152193	0
889.659834297411	33.0	0.09113709948575105	0.030303030303030304	0.0	65	3	STK40	protein_coding	2	false	0.613328139575153	ENSG00000196182	83931	2.3333333333333335	1	0.164445120618964	0	false	0	ENSG00000196182	106795
181.53646260583	3.5	0.0	0.2857142857142857	0.0	6	1	HAUS1	protein_coding	0	false	-1.57338471575647	ENSG00000152240	115106	3.0	1	0.00668135809514123	0	false	0	ENSG00000152240	0
35.868410119824	25.5	0.0	0.0392156862745098	0.0	50	1	SPC25	protein_coding	0	false	-2.13298728992784	ENSG00000152253	57405	2.0	1	0.0407797657877782	0	false	0	ENSG00000152253	0
42.7907172460615	13.0	0.0	0.07692307692307693	0.0	25	1	SUV39H2	protein_coding	0	false	-1.97024409064879	ENSG00000152455	79723	7.0	1	0.00494567625150799	0	false	0	ENSG00000152455	0
303.612822447832	3.0	0.0	0.3333333333333333	0.0	5	1	CAMK4	protein_coding	0	false	-1.57644201403012	ENSG00000152495	814	2.0	1	0.00227785433597822	0	false	0	ENSG00000152495	0
71.4174478891228	5.0	0.22102037367960226	0.2	0.0	9	2	NADK2	protein_coding	1	false	-0.427492970899835	ENSG00000152620	133686	2.0	1	0.506023994961389	0	false	0	ENSG00000152620	258993
67.156318551299	4.5	0.19806691551331876	0.2222222222222222	0.0	8	2	ETFRF1	protein_coding	1	false	-0.269630909654139	ENSG00000205707	144363	2.0	1	0.752628757367436	0	false	0	ENSG00000205707	232096
122.09708375791	4.0	0.01657697605234996	0.25	0.0	7	2	EXOSC6	protein_coding	1	false	-1.09636585039303	ENSG00000223496	118460	2.0	1	0.00500299187422863	0	false	0	ENSG00000223496	19425
141.10424629176	1.5	0.0	0.6666666666666666	0.0	2	1	DNAI4	protein_coding	0	false	-2.19709705534513	ENSG00000152763	79819	2.0	1	0.00576667533196827	0	false	0	ENSG00000152763	0
114.252516694897	13.0	0.0	0.07692307692307693	0.0	25	1	CENPH	protein_coding	0	false	-2.32805298573005	ENSG00000153044	64946	4.0	1	5.15533038133616E-4	0	false	0	ENSG00000153044	0
24.5116114918519	12.5	1.249107787466526	0.08	0.0	24	4	PMVK	protein_coding	3	false	-0.0701160294734385	ENSG00000163344	10654	2.0	1	0.962726313556602	0	false	0	ENSG00000163344	1463712
2838.28382003278	2.0	0.0	0.5	0.0	3	1	CDYL	protein_coding	0	false	-1.98040719630965	ENSG00000153046	9425	112.0	1	0.0286304855290471	0	false	0	ENSG00000153046	0
2807.9659242928	2.0	0.0	0.5	0.0	3	1	SMARCA5	protein_coding	0	false	-1.56411955049279	ENSG00000153147	8467	112.0	1	0.0149479590489354	0	false	0	ENSG00000153147	0
2810.4312447365	2.0	0.0	0.5	0.0	3	1	ASAP1	protein_coding	0	false	-1.23567542051888	ENSG00000153317	50807	112.0	1	0.0423032859147076	0	false	0	ENSG00000153317	0
28.5738849357606	10.5	0.0	0.09523809523809523	0.0	20	1	AK5	protein_coding	0	false	-2.15268107416767	ENSG00000154027	26289	2.0	1	0.0206908976736825	0	false	0	ENSG00000154027	0
29.6910152367949	6.5	0.12312276946866631	0.15384615384615385	0.0	12	2	PGM5	protein_coding	1	false	0.494499932994191	ENSG00000154330	5239	2.0	1	0.823263347687351	0	false	0	ENSG00000154330	144276
299.899859046601	28.5	0.0	0.03508771929824561	0.0	56	1	OXNAD1	protein_coding	0	false	-1.02610312642594	ENSG00000154814	92106	2.0	1	0.0251604558346905	0	false	0	ENSG00000154814	0
15.4065437562966	28.0	0.010513685712481418	0.03571428571428571	0.0	55	2	SRR	protein_coding	1	false	-0.513081305930238	ENSG00000167720	63826	5.0	1	0.754259131808913	0	false	0	ENSG00000167720	12320
110.477973374211	28.0	0.0	0.03571428571428571	0.0	55	1	APOOL	protein_coding	0	false	-1.19534551836765	ENSG00000155008	139322	9.0	1	0.0323563181684178	0	false	0	ENSG00000155008	0
16.2420260338631	7.0	0.09550813018537198	0.14285714285714285	0.0	13	2	GRAMD2B	protein_coding	1	false	-0.508056599851371	ENSG00000155324	65983	2.0	1	0.760961386679599	0	false	0	ENSG00000155324	111917
547.694539030062	12.5	0.037255313592864346	0.08	0.0	24	2	CNOT8	protein_coding	1	false	0.213778729708251	ENSG00000155508	9337	2.0	1	0.573131194068587	0	false	0	ENSG00000155508	43656
1418.95681260576	12.0	0.04002112977745463	0.08333333333333333	0.0	23	2	CASP4	protein_coding	1	false	1.02472011221102	ENSG00000196954	837	3.0	1	0.0548757804091354	0	false	0	ENSG00000196954	46897
1515.33381845902	13.5	0.0	0.07407407407407407	0.0	26	1	FLACC1	protein_coding	0	false	-2.60501292765049	ENSG00000155749	130540	2.0	1	0.00157197400006658	0	false	0	ENSG00000155749	0
183.561813859654	17.0	0.19400566305344058	0.058823529411764705	0.0	33	3	RRAGA	protein_coding	2	false	0.169733433726938	ENSG00000155876	10670	2.0	1	0.82582088825956	0	false	0	ENSG00000155876	227337
26.6067833546688	16.5	0.1940525991503713	0.06060606060606061	0.0	32	2	RNF152	protein_coding	1	false	-0.928558354949098	ENSG00000176641	220441	2.5	1	0.566333463869749	0	false	0	ENSG00000176641	227392
278.331540578315	12.0	0.14257650157107918	0.08333333333333333	0.0	23	2	CLIC2	protein_coding	1	false	0.561371060814607	ENSG00000155962	1193	2.5	1	0.73037444686686	0	false	0	ENSG00000155962	167072
351.575238670958	16.5	0.0028673688306767504	0.06060606060606061	0.0	32	2	VPS37A	protein_coding	1	false	-0.232187565953739	ENSG00000155975	137492	1.5	1	0.669085230084215	0	false	0	ENSG00000155975	3360
162.316294587418	16.0	0.008439110228143566	0.0625	0.0	31	2	ARRDC1	protein_coding	1	false	1.03622683331551	ENSG00000197070	92714	2.0	1	0.0383734748298908	0	false	0	ENSG00000197070	9889
248.348976766612	2.0	0.0	0.5	0.0	3	1	CARNMT1	protein_coding	0	false	-1.05208414151049	ENSG00000156017	138199	3.0	1	0.040110457433504	0	false	0	ENSG00000156017	0
35.074218376851	1.5	0.004220835189442621	0.6666666666666666	0.0	2	3	CHCHD10	protein_coding	2	false	-0.363886883617601	ENSG00000250479	400916	6.0	1	0.689766903179451	0	false	0	ENSG00000250479	4946
70.0299851201832	6.0	0.030865177341641875	0.16666666666666666	0.0	11	2	DPY19L4	protein_coding	1	false	-0.498920695332004	ENSG00000156162	286148	2.0	1	0.470648212657852	0	false	0	ENSG00000156162	36168
196.828841131131	9.0	0.0	0.1111111111111111	0.0	17	1	WHAMM	protein_coding	0	false	-1.24635960340853	ENSG00000156232	123720	3.0	1	0.0126104796523037	0	false	0	ENSG00000156232	0
206.606074893592	8.5	0.029329086896636474	0.11764705882352941	0.0	16	3	ZFYVE1	protein_coding	2	false	0.154784666891524	ENSG00000165861	53349	1.6666666666666667	1	0.862180005883324	0	false	0	ENSG00000165861	34368
1123.11473875004	34.5	0.0	0.028985507246376812	0.0	68	1	MAP3K7CL	protein_coding	0	false	-1.14850615065389	ENSG00000156265	56911	2.0	1	0.0395539526945002	0	false	0	ENSG00000156265	0
672.254112599541	2.0	0.0	0.5	0.0	3	1	UQCRB	protein_coding	0	false	-1.07422207153385	ENSG00000156467	7381	112.0	1	0.00928753203580917	0	false	0	ENSG00000156467	0
3081.37978674432	2.5	0.0	0.4	0.0	4	1	RPL30	protein_coding	0	false	-1.32907169621315	ENSG00000156482	6156	10.0	1	9.24296836251875E-5	0	false	0	ENSG00000156482	0
954.539016935228	7.5	0.0	0.13333333333333333	0.0	14	1	TBC1D31	protein_coding	0	false	-1.69974906392225	ENSG00000156787	93594	10.0	1	0.0220921660085817	0	false	0	ENSG00000156787	0
764.63319212942	2.0	0.0	0.5	0.0	3	1	ATAD2	protein_coding	0	false	-1.51967703451899	ENSG00000156802	29028	112.0	1	0.0217425298325892	0	false	0	ENSG00000156802	0
112.913766762022	7.5	0.0	0.13333333333333333	0.0	14	1	FBXO32	protein_coding	0	false	-1.04164884791285	ENSG00000156804	114907	10.0	1	0.0355919541158111	0	false	0	ENSG00000156804	0
2719.87525716145	3.5	0.0	0.2857142857142857	0.0	6	1	FCHO2	protein_coding	0	false	-1.74856951270125	ENSG00000157107	115548	5.0	1	0.0199329752981146	0	false	0	ENSG00000157107	0
118.099251903879	3.0	0.04116295700824198	0.3333333333333333	0.0	5	5	MYO19	protein_coding	4	false	-0.044090439912087	ENSG00000278259	80179	2.2	1	0.955363240865333	0	false	0	ENSG00000278259	48235
374.138662949442	19.5	0.0	0.05128205128205128	0.0	38	1	SSBP3	protein_coding	0	false	-1.55905977447558	ENSG00000157216	23648	3.0	1	0.0243422800585688	0	false	0	ENSG00000157216	0
66.0613005811656	14.5	0.045638953888271605	0.06896551724137931	0.0	28	2	RAB28	protein_coding	1	false	-0.340456442114039	ENSG00000157869	9364	2.5	1	0.612051145175037	0	false	0	ENSG00000157869	53480
570.124076996352	2.0	0.0	0.5	0.0	3	1	EMSY	protein_coding	0	false	-1.03246441916818	ENSG00000158636	56946	112.0	1	0.0387079167101152	0	false	0	ENSG00000158636	0
955.320961307829	11.5	0.0	0.08695652173913043	0.0	22	1	ELK4	protein_coding	0	false	-1.03832531852155	ENSG00000158711	2005	2.0	1	0.0133406349807305	0	false	0	ENSG00000158711	0
147.340614776011	11.0	0.003512526817579019	0.09090909090909091	0.0	21	2	MUS81	protein_coding	1	false	0.336592265591643	ENSG00000172732	80198	1.5	1	0.567853905830714	0	false	0	ENSG00000172732	4116
289.653994476198	31.0	0.3130671800622287	0.03225806451612903	0.0	61	2	CDA	protein_coding	1	false	2.07532903742453	ENSG00000158825	978	2.0	1	4.74471048821766E-4	0	false	0	ENSG00000158825	366854
112.177315613637	30.5	0.31786831608645116	0.03278688524590164	0.0	60	2	ZMYM6	protein_coding	1	false	0.00499650004356881	ENSG00000163867	9204	2.5	1	0.994707545378588	0	false	0	ENSG00000163867	372480
260.241137375371	6.0	0.02515774795486625	0.16666666666666666	0.0	11	2	PAXBP1	protein_coding	1	false	0.0367030866820205	ENSG00000159086	94104	2.0	1	0.948953908131079	0	false	0	ENSG00000159086	29480
199.724635546506	16.0	1.4495428424158947	0.0625	0.0	31	2	IFNAR2	protein_coding	1	false	0.920429667317616	ENSG00000159110	3455	2.0	1	0.0279260048557047	0	false	0	ENSG00000159110	1698583
9192.97726155847	2.0	0.0	0.5	0.0	3	1	MORC3	protein_coding	0	false	-1.99421213499629	ENSG00000159256	23515	112.0	1	0.0133017592421663	0	false	0	ENSG00000159256	0
66.6886250903816	2.0	0.0	0.5	0.0	3	1	THEM4	protein_coding	0	false	-1.69281547297712	ENSG00000159445	117145	4.0	1	0.00143473446508633	0	false	0	ENSG00000159445	0
1847.02534443176	2.0	0.0	0.5	0.0	3	1	PCNT	protein_coding	0	false	-1.77276072973827	ENSG00000160299	5116	112.0	1	0.0454909287304928	0	false	0	ENSG00000160299	0
418.183311074399	5.5	0.016905528730865007	0.18181818181818182	0.0	10	2	MPZL3	protein_coding	1	false	0.88925990497713	ENSG00000160588	196264	2.0	1	0.250080628067758	0	false	0	ENSG00000160588	19810
281.710256009866	21.5	0.0	0.046511627906976744	0.0	42	1	CD3G	protein_coding	0	false	-1.53562462909846	ENSG00000160654	917	6.0	1	0.00168088669617464	0	false	0	ENSG00000160654	0
171.718205829984	6.5	0.025550304401923185	0.15384615384615385	0.0	12	2	KIAA1143	protein_coding	1	false	-0.458240435716807	ENSG00000163807	57456	2.0	1	0.607397234963988	0	false	0	ENSG00000163807	29940
618.147411424827	3.0	0.0	0.3333333333333333	0.0	5	1	ZNF394	protein_coding	0	false	-1.03245827868564	ENSG00000160908	84124	2.0	1	0.0385822801257249	0	false	0	ENSG00000160908	0
120.467124811326	4.0	0.013691686166481483	0.25	0.0	7	2	SH2B1	protein_coding	1	false	0.375844735104279	ENSG00000178188	25970	2.0	1	0.609209191370752	0	false	0	ENSG00000178188	16044
203.691114472129	28.0	0.0	0.03571428571428571	0.0	55	1	MFSD12	protein_coding	0	false	-1.42078549118369	ENSG00000161091	126321	9.0	1	0.0244891234798127	0	false	0	ENSG00000161091	0
135.162566256226	12.5	0.22601010747512812	0.08	0.0	24	2	ABCF3	protein_coding	1	false	0.112926105929137	ENSG00000161204	55324	2.0	1	0.852607922651424	0	false	0	ENSG00000161204	264840
55.8554054279399	12.0	0.22014565550952972	0.08333333333333333	0.0	23	2	ZBED6CL	protein_coding	1	false	-0.235662207656195	ENSG00000188707	113763	3.0	1	0.73046160233509	0	false	0	ENSG00000188707	257968
10.7029328862237	5.5	0.08370839541698882	0.18181818181818182	0.0	10	2	TMEM143	protein_coding	1	false	-0.680248854887713	ENSG00000161558	55260	2.0	1	0.664560714145197	0	false	0	ENSG00000161558	98090
7.19818810089743	5.0	0.07671235682356978	0.2	0.0	9	2	TMEM30B	protein_coding	1	false	-0.726611472849276	ENSG00000182107	161291	2.5	1	0.734764467455819	0	false	0	ENSG00000182107	89892
79.7306739229583	5.0	0.0	0.2	0.0	9	1	ZNF385A	protein_coding	0	false	-1.41294346590919	ENSG00000161642	25946	2.0	1	0.030656841401819	0	false	0	ENSG00000161642	0
717.804378687918	2.0	0.0	0.5	0.0	3	1	LARP4	protein_coding	0	false	-1.3641865781859	ENSG00000161813	113251	5.0	1	0.0126104796523037	0	false	0	ENSG00000161813	0
15.2831354561846	5.5	0.0	0.18181818181818182	0.0	10	1	TAMALIN	protein_coding	0	false	-1.90629432539471	ENSG00000161835	160622	2.0	1	0.0228247159679562	0	false	0	ENSG00000161835	0
130.781969350118	5.0	0.0013440791393797267	0.2	0.0	9	2	SRC	protein_coding	1	false	0.463594131125094	ENSG00000197122	6714	2.0	1	0.473472697705434	0	false	0	ENSG00000197122	1575
727.485339324729	18.5	0.0	0.05405405405405406	0.0	36	1	RPL26	protein_coding	0	false	-1.19875397727514	ENSG00000161970	6154	8.0	1	0.0063377114296056	0	false	0	ENSG00000161970	0
1073.49552943372	18.5	0.0	0.05405405405405406	0.0	36	1	RPL29	protein_coding	0	false	-1.18401227015523	ENSG00000162244	6159	8.0	1	0.00421731278046957	0	false	0	ENSG00000162244	0
17.0780565021469	4.5	0.18850219234241844	0.2222222222222222	0.0	8	2	IGKV1D-13	IG_V_gene	1	false	-0.627472199141419	ENSG00000276566		2.5	1	0.816738287250557	0	false	0	ENSG00000276566	220888
67.5124559924638	2.5	0.0	0.4	0.0	4	1	TFB2M	protein_coding	0	false	-1.29383240551931	ENSG00000162851	64216	6.0	1	0.00701502000465194	0	false	0	ENSG00000162851	0
390.08080591254	1.5	0.0	0.6666666666666666	0.0	2	1	FCMR	protein_coding	0	false	-1.05971324608815	ENSG00000162894	9214	2.0	1	0.0149888651387263	0	false	0	ENSG00000162894	0
101.703401894715	1.0	1.4422182511439607E-4	1.0	0.0	1	2	ZNHIT3	protein_coding	1	false	-0.445572986465968	ENSG00000273611	9326	8.0	1	0.337805826979404	0	false	0	ENSG00000273611	169
238.293619212489	4.5	0.06975898740917866	0.2222222222222222	0.0	8	4	RAB4A	protein_coding	3	false	-0.1677911866379	ENSG00000168118	5867	5.25	1	0.853896037082874	0	false	0	ENSG00000168118	81744
89.3327547774419	7.5	0.0	0.13333333333333333	0.0	14	1	CCDC138	protein_coding	0	false	-1.45101066296964	ENSG00000163006	165055	10.0	1	0.0209547078820171	0	false	0	ENSG00000163006	0
73.9979475192131	7.5	0.0	0.13333333333333333	0.0	14	1	PACRGL	protein_coding	0	false	-1.04179100306045	ENSG00000163138	133015	2.0	1	0.0131291032474813	0	false	0	ENSG00000163138	0
150.685794841342	16.5	0.1680824300268133	0.06060606060606061	0.0	32	2	H2BC10	protein_coding	1	false	-0.263538599980878	ENSG00000278588	8346	3.5	1	0.776480782370719	0	false	0	ENSG00000278588	196960
236.741775798926	16.0	0.0	0.0625	0.0	31	1	CCNYL1	protein_coding	0	false	-1.25869556708349	ENSG00000163249	151195	3.0	1	0.0220921660085817	0	false	0	ENSG00000163249	0
1010.27398082352	12.0	1.2015760287965755	0.08333333333333333	0.0	23	2	SETD3	protein_coding	1	false	-0.967375722295596	ENSG00000183576	84193	3.0	1	0.108776300483584	0	false	0	ENSG00000183576	1408014
28.9999585633122	6.0	0.017084739282782303	0.16666666666666666	0.0	11	2	TMEM79	protein_coding	1	false	0.814517267958007	ENSG00000163472	84283	2.0	1	0.331026770072212	0	false	0	ENSG00000163472	20020
188.76856293191	3.0	0.03755741138038208	0.3333333333333333	0.0	5	2	CWC22	protein_coding	1	false	-0.138524635507263	ENSG00000163510	57703	3.0	1	0.768761471665586	0	false	0	ENSG00000163510	44010
13.2141462432082	2.5	0.030592094595863137	0.4	0.0	4	2	MAP10	protein_coding	1	false	-1.06155409740999	ENSG00000212916	54627	2.5	1	0.386715817655002	0	false	0	ENSG00000212916	35848
197.900367434593	2.5	0.010797009061226858	0.4	0.0	4	2	THOC7	protein_coding	1	false	-0.537483381726322	ENSG00000163634	80145	2.0	1	0.414154946736039	0	false	0	ENSG00000163634	12652
573.186033125631	6.5	0.0336301401426516	0.15384615384615385	0.0	12	2	GMPS	protein_coding	1	false	-1.39865218355404	ENSG00000163655	8833	2.5	1	0.00868562414213698	0	false	0	ENSG00000163655	39408
39.0264206105241	12.5	0.14558041177464529	0.08	0.0	24	3	RPP14	protein_coding	2	false	0.135854855686007	ENSG00000163684	11102	2.0	1	0.897328985667706	0	false	0	ENSG00000163684	170592
461.790642738165	7.5	0.10332085686538557	0.13333333333333333	0.0	14	2	TTC14	protein_coding	1	false	-0.00830285276399619	ENSG00000163728	151613	2.0	1	0.991720774976853	0	false	0	ENSG00000163728	121072
46.2752509550867	7.0	0.09766036357554066	0.14285714285714285	0.0	13	2	CCNQ	protein_coding	1	false	-0.481436302067291	ENSG00000262919	92002	2.0	1	0.60057954046476	0	false	0	ENSG00000262919	114439
486.217934388107	2.0	0.0	0.5	0.0	3	1	KIF15	protein_coding	0	false	-2.07977153677044	ENSG00000163808	56992	112.0	1	0.0092589664063817	0	false	0	ENSG00000163808	0
872.845158997025	30.0	0.3810460093223622	0.03333333333333333	0.0	59	3	PLEKHO2	protein_coding	2	false	1.27127261280667	ENSG00000241839	80301	2.3333333333333335	1	0.00529599396211015	0	false	0	ENSG00000241839	446512
111.942081621523	14.5	0.21880413652089167	0.06896551724137931	0.0	28	2	PRIM1	protein_coding	1	false	-1.40067138348406	ENSG00000198056	5557	3.0	1	0.0381037378601884	0	false	0	ENSG00000198056	256396
27.003090173717	28.5	0.44243501057342255	0.03508771929824561	0.0	56	2	BDH2	protein_coding	1	false	-1.43353905639249	ENSG00000164039	56898	3.0	1	0.178104266980714	0	false	0	ENSG00000164039	518448
87.538172856049	14.5	0.0	0.06896551724137931	0.0	28	1	ATRIP	protein_coding	0	false	-1.51098752098427	ENSG00000164053	84126	3.0	1	0.0120076941797914	0	false	0	ENSG00000164053	0
539.988110188426	14.0	0.6414252871209056	0.07142857142857142	0.0	27	3	HMGN2	protein_coding	2	false	0.0955029568744729	ENSG00000198830	3151	2.0	1	0.849115103995715	0	false	0	ENSG00000198830	751626
99.5622621812645	5.5	0.06641884407487246	0.18181818181818182	0.0	10	2	DUSP7	protein_coding	1	false	-0.571198732326165	ENSG00000164086	1849	2.0	1	0.211537593245659	0	false	0	ENSG00000164086	77830
935.205557826376	5.0	0.060905986144464186	0.2	0.0	9	2	FAR1	protein_coding	1	false	0.871087088994484	ENSG00000197601	84188	2.0	1	0.0672821156733864	0	false	0	ENSG00000197601	71370
10.8817909814173	25.0	8.363159089473855E-5	0.04	0.0	49	2	POC1A	protein_coding	1	false	0.279648912002622	ENSG00000164087	25886	2.5	1	0.873536281030888	0	false	0	ENSG00000164087	98
171.042239509621	21.0	0.07557564989426577	0.047619047619047616	0.0	41	2	IKBKE	protein_coding	1	false	0.0692952098239666	ENSG00000263528	9641	5.5	1	0.942576176251965	0	false	0	ENSG00000263528	88560
21.4826754173274	11.5	0.01830507780298104	0.08695652173913043	0.0	22	2	MAP9	protein_coding	1	false	-0.591090548915819	ENSG00000164114	79884	1.5	1	0.546358575450792	0	false	0	ENSG00000164114	21450
776.354248597101	26.0	0.0	0.038461538461538464	0.0	51	1	RHOBTB3	protein_coding	0	false	-1.82326988277764	ENSG00000164292	22836	4.0	1	0.0219756089987427	0	false	0	ENSG00000164292	0
280.901945501889	2.0	0.0	0.5	0.0	3	1	NSA2	protein_coding	0	false	-1.13218327716205	ENSG00000164346	10412	22.0	1	0.0361050097267471	0	false	0	ENSG00000164346	0
10.7484065873619	6.0	0.6224759047146029	0.16666666666666666	0.0	11	4	TXLNB	protein_coding	3	false	0.3570825632662	ENSG00000164440	167838	2.25	1	0.806069950523412	0	false	0	ENSG00000164440	729421
8.74392299364875	5.5	0.5670819231169665	0.18181818181818182	0.0	10	2	NEFL	protein_coding	1	false	-1.31072814495531	ENSG00000277586	4747	3.5	1	0.405373032738563	0	false	0	ENSG00000277586	664510
2499.16958433966	2.0	0.0	0.5	0.0	3	1	RPS14	protein_coding	0	false	-1.18706400900691	ENSG00000164587	6208	112.0	1	0.00214038167462747	0	false	0	ENSG00000164587	0
145.616055173203	5.0	0.0	0.2	0.0	9	1	ORC5	protein_coding	0	false	-1.45100276591065	ENSG00000164815	5001	3.0	1	0.00179745062178147	0	false	0	ENSG00000164815	0
31.9246010128859	11.5	0.3034512538764949	0.08695652173913043	0.0	22	4	DNAAF5	protein_coding	3	false	-0.806040154623595	ENSG00000164818	54919	2.0	1	0.415926777962978	0	false	0	ENSG00000164818	355586
79.5768567129354	11.0	0.29209527857000217	0.09090909090909091	0.0	21	2	CMKLR1	protein_coding	1	false	-0.314410064158178	ENSG00000174600	1240	3.5	1	0.802162305074535	0	false	0	ENSG00000174600	342279
676.710573961707	9.5	0.0	0.10526315789473684	0.0	18	1	GPR146	protein_coding	0	false	-2.22674777026657	ENSG00000164849	115330	2.0	1	0.0328594507154013	0	false	0	ENSG00000164849	0
23.3927459684654	9.0	0.001944007796512392	0.1111111111111111	0.0	17	2	GPR35	protein_coding	1	false	-0.551630297444189	ENSG00000178623	2859	2.5	1	0.560804114030136	0	false	0	ENSG00000178623	2278
150.698437069292	13.5	0.0052141736772127805	0.07407407407407407	0.0	26	2	SLC4A2	protein_coding	1	false	0.476961821890563	ENSG00000164889	6522	2.0	1	0.393873017469857	0	false	0	ENSG00000164889	6110
26.0300454518616	13.0	0.007829794351624756	0.07692307692307693	0.0	25	2	GPR52	protein_coding	1	false	0.907999793960039	ENSG00000203737	9293	2.0	1	0.290830199596967	0	false	0	ENSG00000203737	9175
34.696291061814	13.0	0.002752162047301345	0.07692307692307693	0.0	25	2	RPP25L	protein_coding	1	false	0.34176190232021	ENSG00000164967	138716	2.0	1	0.797508377086154	0	false	0	ENSG00000164967	3225
191.969941787836	13.5	0.0	0.07407407407407407	0.0	26	1	GKAP1	protein_coding	0	false	-1.91951960793832	ENSG00000165113	80318	2.0	1	0.00238460736033379	0	false	0	ENSG00000165113	0
164.390284576922	4.5	0.0	0.2222222222222222	0.0	8	1	MELK	protein_coding	0	false	-1.91483182940174	ENSG00000165304	9833	4.0	1	0.0121225370688613	0	false	0	ENSG00000165304	0
377.348790977406	13.0	0.0	0.07692307692307693	0.0	25	1	WRN	protein_coding	0	false	-1.45960497873225	ENSG00000165392	7486	3.0	1	0.0323721018154671	0	false	0	ENSG00000165392	0
1073.40776074926	13.5	0.0	0.07407407407407407	0.0	26	1	SKA3	protein_coding	0	false	-2.16927569738016	ENSG00000165480	221150	3.0	1	0.00661869532042734	0	false	0	ENSG00000165480	0
8.94183948941795	13.0	1.2406917185950574	0.07692307692307693	0.0	25	3	CENPW	protein_coding	2	false	0.0418880111463939	ENSG00000203760	387103	2.6666666666666665	1	0.986065086651289	0	false	0	ENSG00000203760	1453850
172.816462377053	14.0	0.0	0.07142857142857142	0.0	27	1	LRR1	protein_coding	0	false	-1.91122773584445	ENSG00000165501	122769	2.0	1	0.00179745062178147	0	false	0	ENSG00000165501	0
269.730415796444	7.0	0.0	0.14285714285714285	0.0	13	1	KLHDC2	protein_coding	0	false	-1.11708080016195	ENSG00000165516	23588	4.0	1	0.0139623004195418	0	false	0	ENSG00000165516	0
915.361532352783	4.5	0.0	0.2222222222222222	0.0	8	1	NEMF	protein_coding	0	false	-1.0697226282594	ENSG00000165525	9147	5.0	1	0.0165309275810828	0	false	0	ENSG00000165525	0
609.297375223606	2.0	0.0	0.5	0.0	3	1	ATP5F1C	protein_coding	0	false	-1.13217432418224	ENSG00000165629	509	112.0	1	0.0156490529457494	0	false	0	ENSG00000165629	0
453.493856207806	9.0	0.06006113639971122	0.1111111111111111	0.0	17	2	FUNDC2	protein_coding	1	false	-1.11401494931213	ENSG00000165775	65991	3.0	1	0.141996924288212	0	false	0	ENSG00000165775	70380
12.8157302296082	7.5	0.02008352918486507	0.13333333333333333	0.0	14	2	NDRG2	protein_coding	1	false	-0.974612734399631	ENSG00000165795	57447	2.0	1	0.513470169001778	0	false	0	ENSG00000165795	23534
85.6140354404465	7.0	0.019969175785070226	0.14285714285714285	0.0	13	2	KLHL11	protein_coding	1	false	-0.500135265607259	ENSG00000178502	55175	2.0	1	0.483375647161235	0	false	0	ENSG00000178502	23400
78.8874537701246	2.0	0.0	0.5	0.0	3	1	ARHGAP42	protein_coding	0	false	-1.58624860926481	ENSG00000165895	143872	112.0	1	0.0315730091860461	0	false	0	ENSG00000165895	0
143.449791584141	11.0	0.0	0.09090909090909091	0.0	21	1	MOAP1	protein_coding	0	false	-1.31644404986385	ENSG00000165943	64112	3.0	1	1.92476760923246E-4	0	false	0	ENSG00000165943	0
83.9187552169454	10.5	1.085606320500151	0.09523809523809523	0.0	20	3	TRIM39	protein_coding	2	false	0.631020532403533	ENSG00000204599	56658	2.0	1	0.330603722940945	0	false	0	ENSG00000204599	1272120
189.884929497615	1.0	0.0015540115001971317	1.0	0.0	1	3	NOLC1	protein_coding	2	false	-0.251437869490376	ENSG00000166197	9221	5.666666666666667	1	0.521000533591394	0	false	0	ENSG00000166197	1821
818.511562222547	2.0	0.0	0.5	0.0	3	1	CCT2	protein_coding	0	false	-1.34253865663803	ENSG00000166226	10576	112.0	1	0.0126104796523037	0	false	0	ENSG00000166226	0
71.2154890656956	2.0	0.0	0.5	0.0	3	1	STXBP4	protein_coding	0	false	-1.14429038950091	ENSG00000166263	252983	112.0	1	0.0447472229296914	0	false	0	ENSG00000166263	0
319.7237691857	13.5	0.0017972258206563202	0.07407407407407407	0.0	26	2	CUL5	protein_coding	1	false	-0.575768005839516	ENSG00000166266	8065	2.5	1	0.050700314369084	0	false	0	ENSG00000166266	2106
71.4000266567273	25.0	0.0	0.04	0.0	49	1	BORCS7	protein_coding	0	false	-1.03399004580909	ENSG00000166275	119032	4.0	1	0.0333211155253424	0	false	0	ENSG00000166275	0
69.7725422421881	25.0	0.912587919843387	0.04	0.0	49	2	PLEKHF1	protein_coding	1	false	-0.296758983414965	ENSG00000166289	79156	3.0	1	0.755230905195484	0	false	0	ENSG00000166289	1069376
46.7147060034448	24.5	0.8984285794747594	0.04081632653061224	0.0	48	2	KIFBP	protein_coding	1	false	-0.153825028415289	ENSG00000198954	26128	2.0	1	0.89844643987995	0	false	0	ENSG00000198954	1052784
123.051217143429	7.5	0.0011350001621428802	0.13333333333333333	0.0	14	2	SERPINB8	protein_coding	1	false	0.228747090867168	ENSG00000166401	5271	2.5	1	0.683108894097935	0	false	0	ENSG00000166401	1330
158.443010151579	3.0	0.15308848051639948	0.3333333333333333	0.0	5	2	EXOSC1	protein_coding	1	false	-0.391915157907668	ENSG00000171311	51013	3.5	1	0.383902589369394	0	false	0	ENSG00000171311	179390
63.8101829516848	17.0	0.0	0.058823529411764705	0.0	33	1	HDGFL3	protein_coding	0	false	-1.42957475414653	ENSG00000166503	50810	2.0	1	0.0199329752981146	0	false	0	ENSG00000166503	0
154.216478932695	9.5	0.06199661036041802	0.10526315789473684	0.0	18	2	SEC11C	protein_coding	1	false	0.153819077162961	ENSG00000166562	90701	2.0	1	0.894909463491123	0	false	0	ENSG00000166562	72648
1776.55674660041	2.0	1.2032708485875648E-4	0.5	0.0	3	2	HSP90B1	protein_coding	1	false	0.208174187210299	ENSG00000166598	7184	56.5	1	0.811595983502027	0	false	0	ENSG00000166598	141
284.204831129394	18.5	0.06276465558292073	0.05405405405405406	0.0	36	2	BEX3	protein_coding	1	false	-0.100571123044066	ENSG00000166681	27018	2.5	1	0.928592350409286	0	false	0	ENSG00000166681	73548
54.6449746546118	3.0	0.013065302618351501	0.3333333333333333	0.0	5	2	ZNF606	protein_coding	1	false	0.297082197335612	ENSG00000166704	80095	2.0	1	0.757106867792252	0	false	0	ENSG00000166704	15310
1049.69072571086	1.0	8.943459924253673E-4	1.0	0.0	1	2	TERF2IP	protein_coding	1	false	0.387521049429098	ENSG00000166848	54386	8.0	1	0.752084921259346	0	false	0	ENSG00000166848	1048
29.2642626390349	3.5	0.006528384391272958	0.2857142857142857	0.0	6	2	PLK1	protein_coding	1	false	0.73920301204622	ENSG00000166851	5347	3.0	1	0.519074611471409	0	false	0	ENSG00000166851	7650
122.118981637225	12.0	0.0	0.08333333333333333	0.0	23	1	ATP23	protein_coding	0	false	-1.45197500006157	ENSG00000166896	91419	3.0	1	0.0390237988197678	0	false	0	ENSG00000166896	0
113.256670597477	11.5	0.7125838236022004	0.08695652173913043	0.0	22	3	GLYCTK	protein_coding	2	false	0.378398142276045	ENSG00000168237	132158	2.6666666666666665	1	0.548268094756049	0	false	0	ENSG00000168237	835010
149.974067748668	21.5	0.21128924071049304	0.046511627906976744	0.0	42	2	MAFK	protein_coding	1	false	-0.0395439340640371	ENSG00000198517	7975	4.5	1	0.962507462815949	0	false	0	ENSG00000198517	247590
183.009644889377	8.0	0.0	0.1250	0.0	15	1	FAM102A	protein_coding	0	false	-1.36842593506925	ENSG00000167106	399665	2.0	1	0.0277454311656624	0	false	0	ENSG00000167106	0
79.3111319384766	10.5	0.14988829208930488	0.09523809523809523	0.0	20	2	URM1	protein_coding	1	false	-0.429937071611887	ENSG00000167118	81605	2.0	1	0.324215713130366	0	false	0	ENSG00000167118	175640
161.024146403896	10.0	0.14391802055971722	0.1	0.0	19	2	ACBD6	protein_coding	1	false	-0.470887982524311	ENSG00000230124		2.0	1	0.521488887507927	0	false	0	ENSG00000230124	168644
102.899501312869	6.5	0.0	0.15384615384615385	0.0	12	1	RNF214	protein_coding	0	false	-1.2789046336782	ENSG00000167257	257160	4.0	1	0.0194880849493955	0	false	0	ENSG00000167257	0
225.699911093188	10.0	0.0	0.1	0.0	19	1	CD3D	protein_coding	0	false	-1.22373912764212	ENSG00000167286	915	3.0	1	0.0126154454527711	0	false	0	ENSG00000167286	0
104.048976888825	9.5	0.28260992007209385	0.10526315789473684	0.0	18	3	SLC25A30	protein_coding	2	false	-0.162936050462737	ENSG00000174032	253512	2.0	1	0.809307332321396	0	false	0	ENSG00000174032	331164
3207.34501378632	1.5	0.0	0.6666666666666666	0.0	2	1	RPL13	protein_coding	0	false	-1.41266210012209	ENSG00000167526	6137	14.0	1	1.57786824569172E-4	0	false	0	ENSG00000167526	0
8465.19229862609	2.0	0.0	0.5	0.0	3	1	EEF2	protein_coding	0	false	-1.21105177332523	ENSG00000167658	1938	112.0	1	0.0187284243402238	0	false	0	ENSG00000167658	0
494.427329715854	15.5	0.6860435942468293	0.06451612903225806	0.0	30	2	RILP	protein_coding	1	false	-1.51706082898667	ENSG00000167705	83547	2.5	1	0.103959297146101	0	false	0	ENSG00000167705	803910
26.1888391505387	17.5	0.6799965181949913	0.05714285714285714	0.0	34	2	SPINDOC	protein_coding	1	false	0.204656359743041	ENSG00000168005	144097	5.0	1	0.861208766065178	0	false	0	ENSG00000168005	796824
29.332433755564	17.0	0.6624185232026462	0.058823529411764705	0.0	33	2	NDUFAF8	protein_coding	1	false	-0.365953207518498	ENSG00000224877	284184	2.0	1	0.767973380538243	0	false	0	ENSG00000224877	776226
510.259952295159	15.5	0.0	0.06451612903225806	0.0	30	1	KIAA1586	protein_coding	0	false	-2.16165915553379	ENSG00000168116	57691	2.0	1	0.00145108596937226	0	false	0	ENSG00000168116	0
14.859857945237	15.0	0.002078842402240644	0.06666666666666667	0.0	29	2	KLRC2	protein_coding	1	false	-0.0214001991511246	ENSG00000205809	3822	1.5	1	0.994152933942001	0	false	0	ENSG00000205809	2436
154.284581607732	13.0	0.23367775894644677	0.07692307692307693	0.0	25	2	BTLA	protein_coding	1	false	-0.0625674171951251	ENSG00000186265	151888	2.0	1	0.932139539763186	0	false	0	ENSG00000186265	273825
4492.80997687569	14.0	0.0	0.07142857142857142	0.0	27	1	PCMTD1	protein_coding	0	false	-1.73241891376452	ENSG00000168300	115294	2.0	1	0.00377033589662282	0	false	0	ENSG00000168300	0
203.435807249731	23.5	0.05193521794563264	0.0425531914893617	0.0	46	2	ATG4B	protein_coding	1	false	0.399706316490716	ENSG00000168397	23192	2.5	1	0.404930613826822	0	false	0	ENSG00000168397	60858
102.158816473394	8.0	0.10968965852709407	0.1250	0.0	15	2	CDK10	protein_coding	1	false	0.0177457468452575	ENSG00000185324	8558	2.0	1	0.985424985914014	0	false	0	ENSG00000185324	128535
106.864355545026	2.5	0.0	0.4	0.0	4	1	ADAL	protein_coding	0	false	-1.81144979161331	ENSG00000168803	161823	2.0	1	0.0212090428982381	0	false	0	ENSG00000168803	0
81.2879284281805	27.0	0.5790711090402336	0.037037037037037035	0.0	53	3	NSMCE1	protein_coding	2	false	0.0227895467751767	ENSG00000169189	197370	2.3333333333333335	1	0.980708650772329	0	false	0	ENSG00000169189	678559
1080.83301880592	5.0	0.0996385067152754	0.2	0.0	9	2	PTAFR	protein_coding	1	false	0.964434729288636	ENSG00000169403	5724	2.0	1	0.105460439510257	0	false	0	ENSG00000169403	116757
67.0013660855468	21.5	4.301053246015125E-4	0.046511627906976744	0.0	42	2	TMEM192	protein_coding	1	false	-0.6591686759926	ENSG00000170088	201931	2.0	1	0.167112201004144	0	false	0	ENSG00000170088	504
65.9111737467442	21.0	0.1752585325557302	0.047619047619047616	0.0	41	3	IFI30	protein_coding	2	false	0.654647436240094	ENSG00000216490	10437	2.0	1	0.288435350263088	0	false	0	ENSG00000216490	205369
271.471418285165	14.5	1.3822629343082387	0.06896551724137931	0.0	28	3	RNF34	protein_coding	2	false	0.465775795923305	ENSG00000170633	80196	2.0	1	0.172591180906955	0	false	0	ENSG00000170633	1619744
112.326636642111	14.0	1.3345784199773683	0.07142857142857142	0.0	27	2	UNC119B	protein_coding	1	false	0.201698814359284	ENSG00000175970	84747	3.0	1	0.749562919891357	0	false	0	ENSG00000175970	1563867
38.8722480436945	29.0	0.44688199241171317	0.034482758620689655	0.0	57	2	CDCA4	protein_coding	1	false	-0.428849693858393	ENSG00000170779	55038	2.5	1	0.663779030845304	0	false	0	ENSG00000170779	523659
102.969790480528	2.0	0.07654338687461917	0.5	0.0	3	2	RIOX2	protein_coding	1	false	-0.382368457422832	ENSG00000170854	84864	12.0	1	0.605265092040635	0	false	0	ENSG00000170854	89694
77.8632980701658	7.5	0.03759837379224889	0.13333333333333333	0.0	14	2	SPATA5L1	protein_coding	1	false	0.143177610080485	ENSG00000171763	79029	2.0	1	0.891594017859114	0	false	0	ENSG00000171763	44058
35.1127041593889	7.0	0.03567826073599213	0.14285714285714285	0.0	13	2	SPHK1	protein_coding	1	false	0.108453079489988	ENSG00000176170	8877	2.0	1	0.918571685103896	0	false	0	ENSG00000176170	41808
136.378471724845	3.0	0.12286590101091818	0.3333333333333333	0.0	5	2	TPK1	protein_coding	1	false	0.434138065856025	ENSG00000196511	27010	2.0	1	0.528788748047137	0	false	0	ENSG00000196511	143975
308.822606100555	11.0	0.0	0.09090909090909091	0.0	21	1	NINJ2	protein_coding	0	false	-2.02818277154561	ENSG00000171840	4815	2.0	1	0.0194844629519351	0	false	0	ENSG00000171840	0
23.3487959393876	10.5	0.0011264663263372947	0.09523809523809523	0.0	20	2	PIGP	protein_coding	1	false	-0.3901531459479	ENSG00000185808	51227	1.5	1	0.662072664166951	0	false	0	ENSG00000185808	1320
570.110652102165	2.5	0.0	0.4	0.0	4	1	RPS21	protein_coding	0	false	-1.10299125251437	ENSG00000171858	6227	3.0	1	0.0274776832763732	0	false	0	ENSG00000171858	0
89.6634590577458	18.5	0.0	0.05405405405405406	0.0	36	1	MTBP	protein_coding	0	false	-1.91899733901468	ENSG00000172167	27085	3.0	1	6.31732704919591E-4	0	false	0	ENSG00000172167	0
475.46671126682	3.0	0.0	0.3333333333333333	0.0	5	1	ZNF131	protein_coding	0	false	-1.32944359047857	ENSG00000172262	7690	2.0	1	0.0122792407967273	0	false	0	ENSG00000172262	0
223.955181880549	2.5	2.1163912797852205E-4	0.4	0.0	4	2	PIP4K2B	protein_coding	1	false	-0.0237243398980733	ENSG00000276293	8396	4.0	1	0.972908436417769	0	false	0	ENSG00000276293	248
272.381820426864	4.5	0.0	0.2222222222222222	0.0	8	1	NAA16	protein_coding	0	false	-1.09080089114253	ENSG00000172766	79612	5.0	1	0.00338225122807296	0	false	0	ENSG00000172766	0
562.216016981609	16.0	0.04685161195624531	0.0625	0.0	31	2	PSME3IP1	protein_coding	1	false	-0.397866578082232	ENSG00000172775	80011	2.0	1	0.477669294313495	0	false	0	ENSG00000172775	54901
8.18077082454112	15.5	0.046850758572664755	0.06451612903225806	0.0	30	2	AMACR	protein_coding	1	false	0.0411974236892321	ENSG00000242110	23600	2.0	1	0.987242447712385	0	false	0	ENSG00000242110	54900
1602.07075067198	2.0	0.0	0.5	0.0	3	1	RPL38	protein_coding	0	false	-1.51614015460626	ENSG00000172809	6169	112.0	1	3.53048963290848E-5	0	false	0	ENSG00000172809	0
714.142648037933	8.0	0.875737963451288	0.1250	0.0	15	2	ANKRD13D	protein_coding	1	false	1.10803601192889	ENSG00000172932	338692	2.0	1	0.00633232501437094	0	false	0	ENSG00000172932	1026195
154.471327747046	7.5	0.8180244852816934	0.13333333333333333	0.0	14	2	SYS1	protein_coding	1	false	-0.13129156446081	ENSG00000204070	90196	2.0	1	0.864939110277285	0	false	0	ENSG00000204070	958566
167.462130573431	3.5	0.01540186686192083	0.2857142857142857	0.0	6	2	ESRRA	protein_coding	1	false	0.818897039541755	ENSG00000173153	2101	2.0	1	0.209373834861963	0	false	0	ENSG00000173153	18048
769.671314048452	16.5	1.4948549503928124	0.06060606060606061	0.0	32	2	MAP3K11	protein_coding	1	false	0.849243796412382	ENSG00000173327	4296	2.0	1	0.0442043740993019	0	false	0	ENSG00000173327	1751680
45.1902113063681	1.5	0.0	0.6666666666666666	0.0	2	1	C11orf80	protein_coding	0	false	-1.50489676148043	ENSG00000173715	79703	2.0	1	0.0172628097968191	0	false	0	ENSG00000173715	0
77728.1593814676	1.0	4.437594618904494E-5	1.0	0.0	1	2	MALAT1	lncRNA	1	false	0.601523160459483	ENSG00000251562	378938	8.0	1	0.152519622739178	0	false	0	ENSG00000251562	52
2438.71985754064	2.0	0.0	0.5	0.0	3	1	PHC3	protein_coding	0	false	-1.28360587322279	ENSG00000173889	80012	112.0	1	0.0223644245161589	0	false	0	ENSG00000173889	0
182.619001195586	2.0	0.0	0.5	0.0	3	1	GOLIM4	protein_coding	0	false	-1.32127246368969	ENSG00000173905	27333	112.0	1	0.0124857579679802	0	false	0	ENSG00000173905	0
281.264569244842	21.5	0.0	0.046511627906976744	0.0	42	1	UBXN2A	protein_coding	0	false	-1.8161502980766	ENSG00000173960	165324	2.0	1	0.00229012324431213	0	false	0	ENSG00000173960	0
14.620917263483	2.5	0.0	0.4	0.0	4	1	LRRC63	protein_coding	0	false	-2.88778201967832	ENSG00000173988	220416	2.0	1	0.0100225548353123	0	false	0	ENSG00000173988	0
71.4571031206359	3.0	0.13638349692696572	0.3333333333333333	0.0	5	2	MSRB3	protein_coding	1	false	0.966673647825742	ENSG00000174099	253827	2.5	1	0.129574605009502	0	false	0	ENSG00000174099	159815
10543.9823051041	2.5	0.10926382012039536	0.4	0.0	4	2	PSAP	protein_coding	1	false	0.345951171959303	ENSG00000197746	5660	3.0	1	0.509747642848527	0	false	0	ENSG00000197746	128036
32.5152893961204	3.5	0.0	0.2857142857142857	0.0	6	1	KICS2	protein_coding	0	false	-1.29160128471397	ENSG00000174206	144577	2.0	1	0.0185394430837715	0	false	0	ENSG00000174206	0
280.64224890949	9.5	0.0	0.10526315789473684	0.0	18	1	ZWILCH	protein_coding	0	false	-2.00670464363154	ENSG00000174442	55055	2.0	1	0.0114266479964035	0	false	0	ENSG00000174442	0
4357.70482477248	1.5	0.0	0.6666666666666666	0.0	2	1	RPL4	protein_coding	0	false	-1.21341474285856	ENSG00000174444	6124	14.0	1	0.00161583476313203	0	false	0	ENSG00000174444	0
7.93867138670595	14.0	0.00447002319496572	0.07142857142857142	0.0	27	2	B4GAT1	protein_coding	1	false	-0.261667112216965	ENSG00000174684	11041	2.0	1	0.888590281879848	0	false	0	ENSG00000174684	5238
1009.33591618432	3.5	0.5630949150285969	0.2857142857142857	0.0	6	3	MARCKS	protein_coding	2	false	1.24979623548526	ENSG00000277443	4082	7.666666666666667	1	0.0599792923232412	0	false	0	ENSG00000277443	659838
423.313843513377	6.5	0.0	0.15384615384615385	0.0	12	1	CEP135	protein_coding	0	false	-1.60674148465429	ENSG00000174799	9662	4.0	1	8.90254684680371E-4	0	false	0	ENSG00000174799	0
333.534066098554	4.0	0.0	0.25	0.0	7	1	RSRC1	protein_coding	0	false	-1.25285149752447	ENSG00000174891	51319	10.0	1	0.022555497025228	0	false	0	ENSG00000174891	0
334.163273340626	8.0	0.2610329696212513	0.1250	0.0	15	2	CTC1	protein_coding	1	false	0.0189355987197903	ENSG00000178971	80169	2.5	1	0.975225582946738	0	false	0	ENSG00000178971	305880
147.842253389425	15.0	0.01319075000469361	0.06666666666666667	0.0	29	2	TOM1L2	protein_coding	1	false	-0.0904965581133826	ENSG00000175662	146691	2.0	1	0.879324185898134	0	false	0	ENSG00000175662	15457
12.8469957222677	14.5	0.013596107205458924	0.06896551724137931	0.0	28	2	SRXN1	protein_coding	1	false	-1.76953277408367	ENSG00000271303	140809	2.5	1	0.126250008827571	0	false	0	ENSG00000271303	15932
49.0848272620403	11.0	0.0	0.09090909090909091	0.0	21	1	LINC02915	lncRNA	0	false	-2.56136211223457	ENSG00000175746	400360	2.0	1	0.0294365656693333	0	false	0	ENSG00000175746	0
9.36712143669922	12.0	0.16361752713333094	0.08333333333333333	0.0	23	3	SFN	protein_coding	2	false	1.02123202788079	ENSG00000175793	2810	3.3333333333333335	1	0.583646503457067	0	false	0	ENSG00000175793	191728
31.4252859609182	13.5	1.2868136875899252	0.07407407407407407	0.0	26	3	ARL2	protein_coding	2	false	0.498312943936328	ENSG00000213465	402	2.0	1	0.527243393796117	0	false	0	ENSG00000213465	1507896
35.6499911937674	22.0	1.065967404160757	0.045454545454545456	0.0	43	2	MBLAC2	protein_coding	1	false	-0.834010739050859	ENSG00000176055	153364	3.0	1	0.335815479416806	0	false	0	ENSG00000176055	1249107
1679.32721817299	21.5	1.0422885699509987	0.046511627906976744	0.0	42	2	ZDHHC20	protein_coding	1	false	-0.340851820853973	ENSG00000180776	253832	4.0	1	0.516614058793078	0	false	0	ENSG00000180776	1221360
120.925239160224	5.5	0.024415304239780306	0.18181818181818182	0.0	10	2	SSNA1	protein_coding	1	false	-0.386459663941932	ENSG00000176101	8636	3.0	1	0.671475283640575	0	false	0	ENSG00000176101	28610
91.0358673881802	5.0	0.02219650693032806	0.2	0.0	9	2	POLR2M	protein_coding	1	false	-0.558015837684401	ENSG00000255529	81488	2.0	1	0.368850402233173	0	false	0	ENSG00000255529	26010
145.04931834684	14.5	0.0039904216226918105	0.06896551724137931	0.0	28	2	TMEM39A	protein_coding	1	false	0.260238286649272	ENSG00000176142	55254	2.0	1	0.626974370600172	0	false	0	ENSG00000176142	4676
411.48937938972	2.5	0.0	0.4	0.0	4	1	ATAD5	protein_coding	0	false	-1.60605794795256	ENSG00000176208	79915	7.0	1	0.0293416129041071	0	false	0	ENSG00000176208	0
6.79229847899608	21.5	0.17551881454780058	0.046511627906976744	0.0	42	2	MAGIX	protein_coding	1	false	0.801255335704645	ENSG00000269313	79917	3.0	1	0.675252160686409	0	false	0	ENSG00000269313	205674
457.114350824257	8.0	0.010611824824245652	0.1250	0.0	15	2	UPP1	protein_coding	1	false	1.62702936792642	ENSG00000183696	7378	2.0	1	3.22613979931652E-5	0	false	0	ENSG00000183696	12435
424.466167034525	16.0	0.19370271188234228	0.0625	0.0	31	2	IRAK4	protein_coding	1	false	0.48691131094937	ENSG00000198001	51135	2.5	1	0.137380887018532	0	false	0	ENSG00000198001	226982
203.279839194416	15.0	0.04672445780274209	0.06666666666666667	0.0	29	2	ACSF3	protein_coding	1	false	-0.419685091801294	ENSG00000176715	197322	2.0	1	0.403750698703072	0	false	0	ENSG00000176715	54752
69.2184064483971	22.0	0.05695140663215583	0.045454545454545456	0.0	43	2	PPIL3	protein_coding	1	false	-0.873104429890906	ENSG00000240344	53938	3.0	1	0.0517210035909208	0	false	0	ENSG00000240344	66736
2480.517786536	7.0	0.13316112052677662	0.14285714285714285	0.0	13	2	TALDO1	protein_coding	1	false	-0.0627290360409794	ENSG00000177156	6888	2.0	1	0.939979245926141	0	false	0	ENSG00000177156	156039
556.555217600704	24.0	0.052302172885272814	0.041666666666666664	0.0	47	2	ULK1	protein_coding	1	false	0.890745591011012	ENSG00000177169	8408	3.0	1	0.0896521990144915	0	false	0	ENSG00000177169	61288
34.2729415176242	27.5	0.54313085954501	0.03636363636363636	0.0	54	2	MAGEF1	protein_coding	1	false	-0.0226423316685422	ENSG00000177383	64110	3.5	1	0.985424985914014	0	false	0	ENSG00000177383	636444
234.554650428894	4.5	0.20622526254345855	0.2222222222222222	0.0	8	2	ZBTB33	protein_coding	1	false	-0.33074556852196	ENSG00000177485	10009	2.5	1	0.503992537402899	0	false	0	ENSG00000177485	241656
2545.32503759389	2.0	0.0	0.5	0.0	3	1	RPLP2	protein_coding	0	false	-1.51612838112	ENSG00000177600	6181	112.0	1	1.92476760923246E-4	0	false	0	ENSG00000177600	0
3126.19688162622	21.0	0.0	0.047619047619047616	0.0	41	1	RPS27	protein_coding	0	false	-1.14465172664339	ENSG00000177954	6232	8.0	1	0.0131291032474813	0	false	0	ENSG00000177954	0
350.784453814987	14.0	0.02400909365543443	0.07142857142857142	0.0	27	2	RIC8A	protein_coding	1	false	0.327456032082775	ENSG00000177963	60626	2.5	1	0.392582965534392	0	false	0	ENSG00000177963	28134
264.015369139442	4.5	0.5356449787763503	0.2222222222222222	0.0	8	2	ASB8	protein_coding	1	false	0.174132661574108	ENSG00000177981	140461	3.0	1	0.735905301692222	0	false	0	ENSG00000177981	627672
218.611183092422	22.0	0.0	0.045454545454545456	0.0	43	1	CD28	protein_coding	0	false	-1.37972274832123	ENSG00000178562	940	2.0	1	0.00636053697508461	0	false	0	ENSG00000178562	0
2409.29788866372	9.5	0.0	0.10526315789473684	0.0	18	1	GRINA	protein_coding	0	false	-1.71747205340919	ENSG00000178719	2907	3.0	1	0.0176405039509603	0	false	0	ENSG00000178719	0
46.4639044132982	9.0	0.7811284461762442	0.1111111111111111	0.0	17	3	TMEM242	protein_coding	2	false	-0.323386261530064	ENSG00000215712	729515	2.3333333333333335	1	0.697288615840999	0	false	0	ENSG00000215712	915331
24.7328303632979	7.5	0.24407282434123054	0.13333333333333333	0.0	14	2	CNPY2	protein_coding	1	false	-0.496352750466134	ENSG00000257727	10330	2.0	1	0.468837690782827	0	false	0	ENSG00000257727	286006
64.8487364831053	11.5	0.2516713517425239	0.08695652173913043	0.0	22	4	EDC3	protein_coding	3	false	-0.0305390476561085	ENSG00000179151	80153	2.25	1	0.971472918508578	0	false	0	ENSG00000179151	294910
762.221231809875	21.0	0.0	0.047619047619047616	0.0	41	1	SHARPIN	protein_coding	0	false	-1.65003335147261	ENSG00000179526	81858	8.0	1	0.0480592037034582	0	false	0	ENSG00000179526	0
1821.78013165845	13.0	0.0	0.07692307692307693	0.0	25	1	MAF1	protein_coding	0	false	-1.6478587115063	ENSG00000179632	84232	2.0	1	0.049158044485153	0	false	0	ENSG00000179632	0
299.157371948118	12.5	1.2288723560043214E-4	0.08	0.0	24	2	NUDT3	protein_coding	1	false	-0.114545472889721	ENSG00000272325	11165	1.5	1	0.867536934755922	0	false	0	ENSG00000272325	144
106.993871083628	4.5	0.0	0.2222222222222222	0.0	8	1	PCED1B	protein_coding	0	false	-1.16147671558888	ENSG00000179715	91523	2.0	1	0.0150952424123772	0	false	0	ENSG00000179715	0
95.2319298830044	14.0	0.0	0.07142857142857142	0.0	27	1	FAHD1	protein_coding	0	false	-1.66277972585655	ENSG00000180185	81889	3.0	1	0.0372995412247656	0	false	0	ENSG00000180185	0
1079.36135210134	25.5	0.0	0.0392156862745098	0.0	50	1	CCDC66	protein_coding	0	false	-2.19239708468174	ENSG00000180376	285331	2.0	1	9.52397986567136E-4	0	false	0	ENSG00000180376	0
52.5670728339315	15.5	0.013620001945714564	0.06451612903225806	0.0	30	2	CUEDC1	protein_coding	1	false	0.536666753803861	ENSG00000180891	404093	2.0	1	0.486226164204338	0	false	0	ENSG00000180891	15960
15.6195712339279	5.5	0.008491166626557639	0.18181818181818182	0.0	10	2	RPH3AL	protein_coding	1	false	0.365912029498738	ENSG00000181031	9501	2.0	1	0.821806717925425	0	false	0	ENSG00000181031	9950
416.19872691315	5.0	0.5274089738403797	0.2	0.0	9	3	MYO15B	protein_coding	2	false	0.637123601256558	ENSG00000266714	80022	2.0	1	0.208397490051034	0	false	0	ENSG00000266714	618021
33.2816501460017	9.5	1.0024219026016252	0.10526315789473684	0.0	18	2	WASHC1	protein_coding	1	false	0.53491821285487	ENSG00000181404	100287171	2.5	1	0.708444145902564	0	false	0	ENSG00000181404	1174644
83.5168466512749	9.0	0.962428934482329	0.1111111111111111	0.0	17	2	WASH8P	unprocessed_pseudogene	1	false	-0.368555077992604	ENSG00000226210	100288778	2.0	1	0.779294291222203	0	false	0	ENSG00000226210	1127780
26.0672387883219	10.5	0.8652456123283205	0.09523809523809523	0.0	20	2	TDRKH	protein_coding	1	false	-0.132868119806575	ENSG00000182134	11022	3.0	1	0.900861257973805	0	false	0	ENSG00000182134	1013900
180.422615716244	10.0	0.839494762784966	0.1	0.0	19	2	ARHGAP19	protein_coding	1	false	0.838595337471219	ENSG00000213390	84986	2.0	1	0.0957014486873202	0	false	0	ENSG00000213390	983725
218.313669564918	2.0	0.0022913349137997246	0.5	0.0	3	2	RBM10	protein_coding	1	false	0.312535699009641	ENSG00000182872	8241	56.5	1	0.394657493272745	0	false	0	ENSG00000182872	2685
1601.35690860399	8.0	0.0	0.1250	0.0	15	1	RPL35A	protein_coding	0	false	-1.28499712475192	ENSG00000182899	6165	2.0	1	0.00214038167462747	0	false	0	ENSG00000182899	0
11.0289990972138	7.5	0.012867317627661917	0.13333333333333333	0.0	14	2	TBCE	protein_coding	1	false	0.537002881502127	ENSG00000285053	6905	2.5	1	0.635994710213629	0	false	0	ENSG00000285053	15078
271.683341508621	2.5	0.0	0.4	0.0	4	1	CNOT10	protein_coding	0	false	-1.06129958466652	ENSG00000182973	25904	7.0	1	0.0296758575765882	0	false	0	ENSG00000182973	0
23.4319219096888	8.0	0.0	0.1250	0.0	15	1	SLC25A21	protein_coding	0	false	-2.85388084154129	ENSG00000183032	89874	2.0	1	0.0172804377319099	0	false	0	ENSG00000183032	0
540.772613676577	6.5	0.0	0.15384615384615385	0.0	12	1	CEP57L1	protein_coding	0	false	-1.69687296505026	ENSG00000183137	285753	4.0	1	0.0468123701607041	0	false	0	ENSG00000183137	0
60.4361283271641	27.0	0.1913200649254228	0.037037037037037035	0.0	53	2	SMDT1	protein_coding	1	false	-0.412840256171035	ENSG00000183172	91689	6.5	1	0.441109759581131	0	false	0	ENSG00000183172	224190
54.928176814788	20.0	0.20418482240234304	0.05	0.0	39	2	GTF2H2C	protein_coding	1	false	0.271881622485276	ENSG00000183474	728340	3.0	1	0.682968579241151	0	false	0	ENSG00000183474	239265
77.5987399916584	11.5	1.1523750518430524	0.08695652173913043	0.0	22	2	NDOR1	protein_coding	1	false	0.807106060644545	ENSG00000188566	27158	2.0	1	0.0676234428274934	0	false	0	ENSG00000188566	1350360
33.8705615381664	6.0	0.06302579095857164	0.16666666666666666	0.0	11	2	SFXN4	protein_coding	1	false	-0.552024628767206	ENSG00000183605	119559	2.5	1	0.594442450144309	0	false	0	ENSG00000183605	73854
61.9675943060274	16.5	0.6446664379598671	0.06060606060606061	0.0	32	2	MRPL54	protein_coding	1	false	-0.27371912957474	ENSG00000183617	116541	2.5	1	0.852607922651424	0	false	0	ENSG00000183617	755424
180.019094825292	16.0	0.6806843453609215	0.0625	0.0	31	3	VPS16	protein_coding	2	false	0.420904685157266	ENSG00000215305	64601	1.6666666666666667	1	0.274734390200343	0	false	0	ENSG00000215305	797630
43.5572554452501	11.0	0.03663063681189548	0.09090909090909091	0.0	21	2	CCR3	protein_coding	1	false	1.02879403461797	ENSG00000183625	1232	2.0	1	0.441730046340834	0	false	0	ENSG00000183625	42924
19.6701224815905	10.5	0.05308045871074222	0.09523809523809523	0.0	20	2	CCL3L3	protein_coding	1	false	0.573476630028431	ENSG00000276085		2.5	1	0.770872680273844	0	false	0	ENSG00000276085	62200
12.1304279239717	9.0	0.0	0.1111111111111111	0.0	17	1	NOG	protein_coding	0	false	-3.77280480458661	ENSG00000183691	9241	2.0	1	0.0165746617955017	0	false	0	ENSG00000183691	0
295.38158213039	8.5	0.014528002075428868	0.11764705882352941	0.0	16	2	KLHL9	protein_coding	1	false	0.113605681805484	ENSG00000198642	55958	1.5	1	0.870508490980701	0	false	0	ENSG00000198642	17024
114.179829536287	19.5	0.0	0.05128205128205128	0.0	38	1	CHEK2	protein_coding	0	false	-1.6989494981641	ENSG00000183765	11200	3.0	1	0.0197486957670011	0	false	0	ENSG00000183765	0
104.834572908554	5.0	0.0	0.2	0.0	9	1	LIN9	protein_coding	0	false	-1.8446986744109	ENSG00000183814	286826	3.0	1	0.0366921905495634	0	false	0	ENSG00000183814	0
2207.86997030028	3.5	0.005197106005601609	0.2857142857142857	0.0	6	2	PTP4A2	protein_coding	1	false	-0.0647248085503417	ENSG00000184007	8073	2.0	1	0.908691633820929	0	false	0	ENSG00000184007	6090
377.240749889185	3.0	0.008853854648295025	0.3333333333333333	0.0	5	2	ATXN7L3B	protein_coding	1	false	-0.315167444364467	ENSG00000253719	552889	2.5	1	0.317219363961459	0	false	0	ENSG00000253719	10375
192.070788815746	19.5	1.4277653468236209	0.05128205128205128	0.0	38	2	COMMD6	protein_coding	1	false	-0.770332511099131	ENSG00000188243	170622	3.5	1	0.106272100610917	0	false	0	ENSG00000188243	1673064
157.366617011255	2.0	0.0	0.5	0.0	3	1	NELL2	protein_coding	0	false	-2.15377768761861	ENSG00000184613	4753	112.0	1	0.00401897174509924	0	false	0	ENSG00000184613	0
3889.39881534537	2.5	0.0	0.4	0.0	4	1	RBM33	protein_coding	0	false	-1.70175372141536	ENSG00000184863	155435	7.0	1	0.0151738939067455	0	false	0	ENSG00000184863	0
39.7353511451291	16.5	0.0	0.06060606060606061	0.0	32	1	IMMP2L	protein_coding	0	false	-1.25840296587194	ENSG00000184903	83943	3.0	1	0.0377016381449547	0	false	0	ENSG00000184903	0
2867.58881697448	13.0	0.01956381858430491	0.07692307692307693	0.0	25	2	ITGB3	protein_coding	1	false	2.48953064427954	ENSG00000259207	3690	2.0	1	0.00195925948837529	0	false	0	ENSG00000259207	22925
350.911013241712	2.0	0.0	0.5	0.0	3	1	FAF1	protein_coding	0	false	-1.28534699322342	ENSG00000185104	11124	112.0	1	0.0208359926256166	0	false	0	ENSG00000185104	0
50.6503262138264	20.5	0.17350994959916574	0.04878048780487805	0.0	40	2	FAM43A	protein_coding	1	false	-0.0199068206781946	ENSG00000185112	131583	2.5	1	0.988922597920441	0	false	0	ENSG00000185112	203320
423.474267214006	11.0	0.0	0.09090909090909091	0.0	21	1	RAB11B	protein_coding	0	false	-1.59846823787905	ENSG00000185236	9230	4.0	1	0.0218379397968414	0	false	0	ENSG00000185236	0
215.652059400911	4.5	0.0	0.2222222222222222	0.0	8	1	PARPBP	protein_coding	0	false	-2.09517322606836	ENSG00000185480	55010	2.0	1	0.00375682096525693	0	false	0	ENSG00000185480	0
117.452162480868	3.0	0.0	0.3333333333333333	0.0	5	1	ZNF566	protein_coding	0	false	-1.83974775709281	ENSG00000186017	84924	2.0	1	0.0065437783879744	0	false	0	ENSG00000186017	0
325.237842771214	1.5	0.0	0.6666666666666666	0.0	2	1	POLR3C	protein_coding	0	false	-1.26327171639262	ENSG00000186141	10623	2.0	1	0.0270676505470336	0	false	0	ENSG00000186141	0
11.1891157188645	4.0	0.0	0.25	0.0	7	1	NAP1L3	protein_coding	0	false	-2.12119224147008	ENSG00000186310	4675	4.0	1	0.0489333908517218	0	false	0	ENSG00000186310	0
2007.18162141612	21.0	0.0	0.047619047619047616	0.0	41	1	RPS23	protein_coding	0	false	-1.1868120074461	ENSG00000186468	6228	8.0	1	5.51232775744034E-4	0	false	0	ENSG00000186468	0
113.569218452553	8.5	0.025137266748932845	0.11764705882352941	0.0	16	2	TMEM222	protein_coding	1	false	-0.146297704025027	ENSG00000186501	84065	3.0	1	0.86660427466204	0	false	0	ENSG00000186501	29456
30.0376569825957	3.0	0.0	0.3333333333333333	0.0	5	1	BCAM	protein_coding	0	false	-2.45688466712602	ENSG00000187244	4059	2.0	1	0.0436950275414091	0	false	0	ENSG00000187244	0
574.955878661556	2.0	0.0	0.5	0.0	3	1	ZC3H6	protein_coding	0	false	-1.50212135232457	ENSG00000188177	376940	112.0	1	0.00163898589365106	0	false	0	ENSG00000188177	0
808266.207085512	14.5	0.0	0.06896551724137931	0.0	28	1	HBA2	protein_coding	0	false	-2.33304335428533	ENSG00000188536	3040	2.0	1	0.0236093189229905	0	false	0	ENSG00000188536	0
11.0213371765186	9.0	0.3226327566167096	0.1111111111111111	0.0	17	2	NPEPPSP1	transcribed_unprocessed_pseudogene	1	false	-0.111084049567359	ENSG00000274487	440434	2.0	1	0.957278576102046	0	false	0	ENSG00000274487	378063
18.7135373353754	11.0	1.119169896723519	0.09090909090909091	0.0	21	2	ZNF658	protein_coding	1	false	0.580877906990083	ENSG00000274349	26149	2.5	1	0.660061634086833	0	false	0	ENSG00000274349	1311450
177.744220533263	3.0	0.014460584772564742	0.3333333333333333	0.0	5	3	NELFE	protein_coding	2	false	-0.0471983902694229	ENSG00000204356	7936	2.0	1	0.947745826819558	0	false	0	ENSG00000204356	16945
584.111215814473	4.0	0.01571079171808303	0.25	0.0	7	2	LIN54	protein_coding	1	false	-1.10452616425858	ENSG00000189308	132660	3.0	1	0.0355008600653873	0	false	0	ENSG00000189308	18410
147.53953166128	13.0	0.0	0.07692307692307693	0.0	25	1	ZNF569	protein_coding	0	false	-1.73908107980646	ENSG00000196437	148266	3.0	1	0.0171063292735238	0	false	0	ENSG00000196437	0
96.582443448981	2.5	0.09852142760832425	0.4	0.0	4	2	C1orf174	protein_coding	1	false	-0.0820584274873502	ENSG00000198912	339448	2.0	1	0.913375172984852	0	false	0	ENSG00000198912	115448
170.257251803248	4.5	0.0	0.2222222222222222	0.0	8	1	SLC6A9	protein_coding	0	false	-2.44381804577425	ENSG00000196517	6536	3.0	1	0.0160728556479704	0	false	0	ENSG00000196517	0
1723.00998691583	2.0	0.0	0.5	0.0	3	1	NACA	protein_coding	0	false	-1.20919030437079	ENSG00000196531	4666	112.0	1	0.00558620955662809	0	false	0	ENSG00000196531	0
20.6512794308909	12.5	0.16389060987910967	0.08	0.0	24	2	XRCC2	protein_coding	1	false	0.639355004914934	ENSG00000196584	7516	2.5	1	0.659619808375225	0	false	0	ENSG00000196584	192048
112.273627843089	12.0	0.17733737495797086	0.08333333333333333	0.0	23	2	AC107959.4	lncRNA	1	false	1.05546697933056	ENSG00000284948	254896	3.0	1	0.214949483020882	0	false	0	ENSG00000284948	207805
239.03746784805	14.0	0.021612792561226005	0.07142857142857142	0.0	27	2	DAPK1	protein_coding	1	false	0.0169209830779229	ENSG00000196730	1612	2.5	1	0.987242447712385	0	false	0	ENSG00000196730	25326
309.472597141042	2.5	0.0	0.4	0.0	4	1	HLA-DQA1	protein_coding	0	false	-1.28423763587455	ENSG00000196735	3117	6.0	1	0.0214429505707235	0	false	0	ENSG00000196735	0
981.098106240757	5.5	0.0	0.18181818181818182	0.0	10	1	STRN3	protein_coding	0	false	-1.83582207022235	ENSG00000196792	29966	4.0	1	0.00130033217221194	0	false	0	ENSG00000196792	0
182.624499817887	2.0	0.0	0.5	0.0	3	1	H2BU1	protein_coding	0	false	-1.98220464510018	ENSG00000196890	128312	112.0	1	0.00179395082387666	0	false	0	ENSG00000196890	0
319.733987554262	2.0	0.0	0.5	0.0	3	1	KPNA5	protein_coding	0	false	-1.28619304995394	ENSG00000196911	3841	112.0	1	0.00280128410172543	0	false	0	ENSG00000196911	0
2627.09096746964	2.0	0.0	0.5	0.0	3	1	AP2A1	protein_coding	0	false	-1.75688652704616	ENSG00000196961	160	112.0	1	0.0391893410583177	0	false	0	ENSG00000196961	0
27.574856302754	8.0	0.30481154730390525	0.1250	0.0	15	2	WBP1	protein_coding	1	false	0.0955854575809954	ENSG00000239779	23559	3.0	1	0.915043448489463	0	false	0	ENSG00000239779	357180
235.717537221148	21.0	0.2096174622761788	0.047619047619047616	0.0	41	2	MAFG	protein_coding	1	false	1.33225926449881	ENSG00000197063	4097	2.5	1	0.0182906843632035	0	false	0	ENSG00000197063	245631
1270.29976729393	2.0	0.0	0.5	0.0	3	1	DDI2	protein_coding	0	false	-1.52500595904477	ENSG00000197312	84301	112.0	1	0.040343221021164	0	false	0	ENSG00000197312	0
3689.29733560685	6.5	0.26203654871198817	0.15384615384615385	0.0	12	2	LRP10	protein_coding	1	false	0.118340090905523	ENSG00000197324	26020	2.5	1	0.89348746982696	0	false	0	ENSG00000197324	307056
441.207462837376	5.0	0.2241616786396383	0.2	0.0	9	2	TRIM10	protein_coding	1	false	-1.54681866356967	ENSG00000204613	10107	2.0	1	0.169362112439496	0	false	0	ENSG00000204613	262674
60.2943814827273	8.0	0.02722720313772075	0.1250	0.0	15	2	KLHL14	protein_coding	1	false	0.248239702181527	ENSG00000197705	57565	2.0	1	0.879164982600998	0	false	0	ENSG00000197705	31905
2439.72347889711	2.0	0.0	0.5	0.0	3	1	RPL12	protein_coding	0	false	-1.42773176659081	ENSG00000197958	6136	112.0	1	1.16693952454146E-5	0	false	0	ENSG00000197958	0
240.109478744915	3.0	0.3108279015468431	0.3333333333333333	0.0	5	2	ZNF121	protein_coding	1	false	-0.442254617114747	ENSG00000197961	7675	4.5	1	0.252182081451512	0	false	0	ENSG00000197961	364230
313.223631417949	17.5	0.0	0.05714285714285714	0.0	34	1	NOL8	protein_coding	0	false	-1.14350284850542	ENSG00000198000	55035	5.0	1	0.00677401754251545	0	false	0	ENSG00000198000	0
2950.87483086521	2.0	0.0	0.5	0.0	3	1	RPS4X	protein_coding	0	false	-1.19320277950124	ENSG00000198034	6191	112.0	1	0.00140367252214151	0	false	0	ENSG00000198034	0
49.7845099678376	11.0	0.0	0.09090909090909091	0.0	21	1	NUP62CL	protein_coding	0	false	-2.29046510564491	ENSG00000198088	54830	2.0	1	0.0258596915758969	0	false	0	ENSG00000198088	0
3138.18411451744	2.0	0.0	0.5	0.0	3	1	MAN1A2	protein_coding	0	false	-2.09376485095911	ENSG00000198162	10905	112.0	1	5.32453102353087E-4	0	false	0	ENSG00000198162	0
1498.19769670397	1.5	0.0	0.6666666666666666	0.0	2	1	RPL23A	protein_coding	0	false	-1.4126901758807	ENSG00000198242	6147	14.0	1	1.83939991384821E-6	0	false	0	ENSG00000198242	0
200.020884913624	3.5	0.3678117367550601	0.2857142857142857	0.0	6	2	ZKSCAN8	protein_coding	1	false	-0.293661937095976	ENSG00000198315	7745	2.5	1	0.701604949352583	0	false	0	ENSG00000198315	431004
202.08439961787	2.0	0.0	0.5	0.0	3	1	WDHD1	protein_coding	0	false	-1.40599335649432	ENSG00000198554	11169	112.0	1	0.0453238040781716	0	false	0	ENSG00000198554	0
172.784147725162	4.5	0.0	0.2222222222222222	0.0	8	1	CEP290	protein_coding	0	false	-1.11172709364447	ENSG00000198707	80184	5.0	1	0.00364688962108495	0	false	0	ENSG00000198707	0
208.282048227626	2.0	0.0	0.5	0.0	3	1	TOGARAM1	protein_coding	0	false	-1.06045734218603	ENSG00000198718	23116	112.0	1	0.0365731245109036	0	false	0	ENSG00000198718	0
1509.63810452667	2.5	0.0	0.4	0.0	4	1	RPL10A	protein_coding	0	false	-1.06096898599377	ENSG00000198755	4736	10.0	1	0.0214429505707235	0	false	0	ENSG00000198755	0
605.373781212233	28.0	0.0	0.03571428571428571	0.0	55	1	MT-ND5	protein_coding	0	false	-1.06493301082143	ENSG00000198786	4540	9.0	1	0.0454846019118548	0	false	0	ENSG00000198786	0
8941.74898398799	12.5	0.01019964055483587	0.08	0.0	24	2	MT-CO1	protein_coding	1	false	-0.217901994445658	ENSG00000198804	4512	2.0	1	0.736217739045324	0	false	0	ENSG00000198804	11952
308.892628475714	12.0	0.02952024481868159	0.08333333333333333	0.0	23	2	C19orf38	protein_coding	1	false	0.857864289095521	ENSG00000214212	255809	3.0	1	0.122178193066568	0	false	0	ENSG00000214212	34592
1117.07382398438	2.0	0.0	0.5	0.0	3	1	OPA1	protein_coding	0	false	-1.23304304110003	ENSG00000198836	4976	112.0	1	0.0220127683632381	0	false	0	ENSG00000198836	0
346.593318795334	20.5	1.177157311022473	0.04878048780487805	0.0	40	2	CD3E	protein_coding	1	false	-1.42634255559271	ENSG00000198851	916	5.0	1	0.0165458957360767	0	false	0	ENSG00000198851	1379400
88.3180101939593	22.0	0.0	0.045454545454545456	0.0	43	1	SHISA4	protein_coding	0	false	-4.52058158339258	ENSG00000198892	149345	2.0	1	1.24885509765639E-11	0	false	0	ENSG00000198892	0
155.167179251557	7.0	0.0	0.14285714285714285	0.0	13	1	DZIP3	protein_coding	0	false	-1.26414449358048	ENSG00000198919	9666	5.0	1	0.00701502000465194	0	false	0	ENSG00000198919	0
37.7851737135046	10.5	0.03486925310162262	0.09523809523809523	0.0	20	2	HGH1	protein_coding	1	false	0.179366905297158	ENSG00000235173	51236	2.0	1	0.862180005883324	0	false	0	ENSG00000235173	40860
15.2598234604039	27.5	0.0	0.03636363636363636	0.0	54	1	MAGEE1	protein_coding	0	false	-2.15726779357887	ENSG00000198934	57692	3.0	1	0.0386954107874484	0	false	0	ENSG00000198934	0
90.6169140040032	24.0	0.8840430924572839	0.041666666666666664	0.0	47	2	CHIC1	protein_coding	1	false	-0.757727489492365	ENSG00000204116	53344	2.5	1	0.171318520341553	0	false	0	ENSG00000204116	1035927
22.6403537202303	12.5	0.0	0.08	0.0	24	1	AGAP9	protein_coding	0	false	-1.88244871220694	ENSG00000204172	642517	2.0	1	0.0447730514314102	0	false	0	ENSG00000204172	0
185.409407592882	2.0	0.0	0.5	0.0	3	1	BMS1P1	transcribed_unprocessed_pseudogene	0	false	-1.94273203855921	ENSG00000204177	399761	2.0	1	0.0320464442789858	0	false	0	ENSG00000204177	0
18.5207581152749	6.0	0.0	0.16666666666666666	0.0	11	1	TCEA3	protein_coding	0	false	-1.8534986573412	ENSG00000204219	6920	2.0	1	0.0198026108405936	0	false	0	ENSG00000204219	0
2077.51989933566	3.5	0.0	0.2857142857142857	0.0	6	1	HLA-DRA	protein_coding	0	false	-1.18922080502274	ENSG00000204287	3122	5.0	1	0.0158043641200381	0	false	0	ENSG00000204287	0
7.10997586288013	10.0	0.04934007847715407	0.1	0.0	19	2	APOM	protein_coding	1	false	-0.341197208024634	ENSG00000204444	55937	2.0	1	0.856120454206695	0	false	0	ENSG00000204444	57817
8.40756242876142	8.5	0.9205755901574151	0.11764705882352941	0.0	16	2	FAM153CP	lncRNA	1	false	-0.254840903278512	ENSG00000204677	653316	2.0	1	0.899890453876126	0	false	0	ENSG00000204677	1078736
623.85717345667	2.0	0.0	0.5	0.0	3	1	ATXN2	protein_coding	0	false	-1.3004167652334	ENSG00000204842	6311	112.0	1	0.0279260048557047	0	false	0	ENSG00000204842	0
32.4035390493918	7.0	0.22673889705292513	0.14285714285714285	0.0	13	2	TCTN1	protein_coding	1	false	-0.895629821856358	ENSG00000204852	79600	2.5	1	0.111890260240207	0	false	0	ENSG00000204852	265694
580.890377411244	22.5	0.0	0.044444444444444446	0.0	44	1	E2F4	protein_coding	0	false	-1.15036857763211	ENSG00000205250	1874	7.0	1	0.0381464811315356	0	false	0	ENSG00000205250	0
2031.74518078878	4.5	0.0	0.2222222222222222	0.0	8	1	NAP1L4	protein_coding	0	false	-1.5687286278717	ENSG00000205531	4676	4.0	1	0.0287530861849218	0	false	0	ENSG00000205531	0
78.3537466764678	4.0	0.17470639337910882	0.25	0.0	7	2	RCC1L	protein_coding	1	false	-0.228954998292742	ENSG00000274523	81554	2.5	1	0.702938100612454	0	false	0	ENSG00000274523	204722
1296.34991294589	2.0	0.0	0.5	0.0	3	1	HBM	protein_coding	0	false	-2.28710177863896	ENSG00000206177	3042	112.0	1	0.0194844629519351	0	false	0	ENSG00000206177	0
324.565907101	19.0	0.0	0.05263157894736842	0.0	37	1	TRBC1	TR_C_gene	0	false	-1.23686077153107	ENSG00000211751		3.0	1	0.0305195860524419	0	false	0	ENSG00000211751	0
563.309800691827	19.0	0.0	0.05263157894736842	0.0	37	1	TRBC2	TR_C_gene	0	false	-1.25283563355206	ENSG00000211772		3.0	1	0.0128386450084094	0	false	0	ENSG00000211772	0
93.5174675243816	9.5	0.8118852438031551	0.10526315789473684	0.0	18	2	SYNJ2BP	protein_coding	1	false	-0.193821982858599	ENSG00000213463	55333	2.5	1	0.810635424841254	0	false	0	ENSG00000213463	951372
416.471876919921	4.0	0.022819476944135803	0.25	0.0	7	2	CHURC1	protein_coding	1	false	0.377037291223852	ENSG00000258289	91612	4.5	1	0.564861766746679	0	false	0	ENSG00000258289	26740
773.319934731595	12.0	0.0	0.08333333333333333	0.0	23	1	LBH	protein_coding	0	false	-1.00430291256438	ENSG00000213626	81606	2.0	1	0.0213077564005843	0	false	0	ENSG00000213626	0
1036.37632219775	21.0	0.0	0.047619047619047616	0.0	41	1	RPS29	protein_coding	0	false	-1.00385278796401	ENSG00000213741	6235	8.0	1	0.0366921905495634	0	false	0	ENSG00000213741	0
9.31515536024792	13.0	0.0	0.07692307692307693	0.0	25	1	ZNF726	protein_coding	0	false	-2.32914475153276	ENSG00000213967	730087	3.0	1	0.0340272921971365	0	false	0	ENSG00000213967	0
64.4742823445033	2.0	0.0	0.5	0.0	3	1	SEPTIN7P2	transcribed_unprocessed_pseudogene	0	false	-1.14048938208433	ENSG00000214765	641977	4.0	1	0.0252798202210873	0	false	0	ENSG00000214765	0
92.7301172364405	21.5	0.0	0.046511627906976744	0.0	42	1	TNFRSF25	protein_coding	0	false	-1.23522913245519	ENSG00000215788	8718	2.0	1	0.0470381193955172	0	false	0	ENSG00000215788	0
930.317972540176	2.0	0.0	0.5	0.0	3	1	CCDC7	protein_coding	0	false	-1.95081351570575	ENSG00000216937	79741	112.0	1	0.00211055964857161	0	false	0	ENSG00000216937	0
12.384744688266	3.0	0.0	0.3333333333333333	0.0	5	1	AL590867.2	processed_pseudogene	0	false	-1.99961112829501	ENSG00000218426		2.0	1	0.02610236182365	0	false	0	ENSG00000218426	0
45.6773279499831	9.0	0.012766618365156007	0.1111111111111111	0.0	17	2	RNASEK	protein_coding	1	false	0.538460068905541	ENSG00000219200	440400	1.5	1	0.356880660796683	0	false	0	ENSG00000219200	14960
46.9967323614214	2.5	0.0	0.4	0.0	4	1	LINC01881	transcribed_unprocessed_pseudogene	0	false	-1.63344508514463	ENSG00000220804		3.0	1	0.0381464811315356	0	false	0	ENSG00000220804	0
9904.53451241243	4.0	0.0	0.25	0.0	7	1	UBA52	protein_coding	0	false	-1.87358418946443	ENSG00000221983	7311	2.0	1	0.0122499275270194	0	false	0	ENSG00000221983	0
24.0718101748583	3.5	0.004895008218083881	0.2857142857142857	0.0	6	2	TMEM141	protein_coding	1	false	0.138215958261687	ENSG00000244187	85014	2.0	1	0.906623436236373	0	false	0	ENSG00000244187	5736
621.245837806594	2.0	0.0	0.5	0.0	3	1	AC135983.3	transcribed_processed_pseudogene	0	false	-1.94462224661071	ENSG00000223509		4.0	1	0.00181650629282181	0	false	0	ENSG00000223509	0
641.731206151086	2.5	0.0	0.4	0.0	4	1	HLA-DPB1	protein_coding	0	false	-1.29594903440671	ENSG00000223865	3115	7.0	1	0.0100845280589533	0	false	0	ENSG00000223865	0
59.0022012025541	2.0	0.0	0.5	0.0	3	1	EPB41L4A-AS1	lncRNA	0	false	-1.22563933514452	ENSG00000224032		22.0	1	0.0327402379900947	0	false	0	ENSG00000224032	0
32.8087625563136	3.0	0.0	0.3333333333333333	0.0	5	1	TNK2-AS1	lncRNA	0	false	-2.35521924909492	ENSG00000224614		3.0	1	0.0199329752981146	0	false	0	ENSG00000224614	0
213.999916199125	2.0	0.0	0.5	0.0	3	1	SBDSP1	transcribed_unprocessed_pseudogene	0	false	-1.92593529511585	ENSG00000225648	155370	4.0	1	0.00214668065032925	0	false	0	ENSG00000225648	0
8.36064693873963	3.0	0.0	0.3333333333333333	0.0	5	1	TRBV2	TR_V_gene	0	false	-2.18132016135348	ENSG00000226660		2.0	1	0.0293159206845421	0	false	0	ENSG00000226660	0
61.3883452593372	2.0	0.0	0.5	0.0	3	1	SATB1-AS1	lncRNA	0	false	-1.11355944227989	ENSG00000228956		3.0	1	0.048822813042992	0	false	0	ENSG00000228956	0
1552.76084364595	14.5	0.0	0.06896551724137931	0.0	28	1	RPL41	protein_coding	0	false	-1.29946675708495	ENSG00000229117	6171	2.0	1	0.00364688962108495	0	false	0	ENSG00000229117	0
266.821517069305	4.5	0.0	0.2222222222222222	0.0	8	1	DPY19L1P1	unprocessed_pseudogene	0	false	-1.56013499983684	ENSG00000229358		2.0	1	0.0461649208598614	0	false	0	ENSG00000229358	0
4987.44033272549	2.0	0.0	0.5	0.0	3	1	ANKRD36BP2	transcribed_unprocessed_pseudogene	0	false	-3.28558282658379	ENSG00000230006	645784	2.0	1	1.83893704729848E-4	0	false	0	ENSG00000230006	0
60.9786697140306	2.0	0.0	0.5	0.0	3	1	AL669831.4	transcribed_unprocessed_pseudogene	0	false	-1.42308373442274	ENSG00000230092		22.0	1	0.0219756089987427	0	false	0	ENSG00000230092	0
184.947840471581	1.5	0.0	0.6666666666666666	0.0	2	1	LINC01036	lncRNA	0	false	-1.83029325763812	ENSG00000230426	104169671	3.0	1	0.0243885345549156	0	false	0	ENSG00000230426	0
125.238347392373	2.0	0.0	0.5	0.0	3	1	AL139220.2	lncRNA	0	false	-1.91567952683847	ENSG00000230615		3.0	1	0.046487869023304	0	false	0	ENSG00000230615	0
920.541226579471	3.5	0.0	0.2857142857142857	0.0	6	1	HLA-DPA1	protein_coding	0	false	-1.12008405422199	ENSG00000231389	3113	5.0	1	0.0159437891318339	0	false	0	ENSG00000231389	0
2828.14349276681	2.0	0.0	0.5	0.0	3	1	RPS18	protein_coding	0	false	-1.08644517976889	ENSG00000231500	6222	112.0	1	0.00521497973588417	0	false	0	ENSG00000231500	0
88.2152510982928	13.0	0.0	0.07692307692307693	0.0	25	1	PRH1	protein_coding	0	false	-1.44392972621712	ENSG00000231887	5554	7.0	1	0.0189245623341639	0	false	0	ENSG00000231887	0
87.9258061272391	2.0	0.0	0.5	0.0	3	1	AC073529.1	lncRNA	0	false	-2.96748163499367	ENSG00000234129		2.0	1	2.06332757422208E-4	0	false	0	ENSG00000234129	0
178.163380001698	2.0	0.0	0.5	0.0	3	1	FAM133B	protein_coding	0	false	-1.43760415270015	ENSG00000234545	257415	2.0	1	0.0199089240218491	0	false	0	ENSG00000234545	0
20.1288492260169	1.5	0.0	0.6666666666666666	0.0	2	1	RPL23AP42	processed_pseudogene	0	false	-2.03386364679965	ENSG00000234851		2.0	1	0.0224760863736883	0	false	0	ENSG00000234851	0
42.6101036505374	2.5	0.03361307247104043	0.4	0.0	4	2	HLA-DQA2	protein_coding	1	false	-1.69169155790126	ENSG00000237541	3117	5.5	1	0.468837690782827	0	false	0	ENSG00000237541	39388
147.432173584342	22.0	0.0	0.045454545454545456	0.0	43	1	NSUN6	protein_coding	0	false	-1.05233913022563	ENSG00000241058	221078	2.0	1	0.0372556844141655	0	false	0	ENSG00000241058	0
19.9764179499879	2.5	0.0026284214281203544	0.4	0.0	4	2	YAE1	protein_coding	1	false	-0.220152854098951	ENSG00000241127	57002	3.0	1	0.856197398622809	0	false	0	ENSG00000241127	3080
8.46258377715322	2.0	0.0	0.5	0.0	3	1	RN7SL494P	misc_RNA	0	false	-2.13095154125889	ENSG00000241175		2.0	1	0.0479921555530192	0	false	0	ENSG00000241175	0
9.73730024242322	11.5	0.07051679202871465	0.08695652173913043	0.0	22	2	CNTF	protein_coding	1	false	0.608317648810037	ENSG00000242689	1270	2.0	1	0.665733647085803	0	false	0	ENSG00000242689	82632
185.846385967413	11.0	0.08356588035903553	0.09090909090909091	0.0	21	2	CORO7	protein_coding	1	false	0.397434915137315	ENSG00000262246	79585	2.5	1	0.510362546252375	0	false	0	ENSG00000262246	97923
9.90833171772838	2.0	0.0	0.5	0.0	3	1	AC116533.1	processed_pseudogene	0	false	-2.04407028518364	ENSG00000244398		2.0	1	0.0157389215132769	0	false	0	ENSG00000244398	0
557.198267347501	12.0	0.05603743281737762	0.08333333333333333	0.0	23	2	RBM12	protein_coding	1	false	0.270308510746834	ENSG00000244462	10137	2.0	1	0.359766046838428	0	false	0	ENSG00000244462	65665
177.292418604214	3.0	0.0	0.3333333333333333	0.0	5	1	AP000787.1	lncRNA	0	false	-2.11619642075402	ENSG00000245552	101929295	3.0	1	0.0373095666355269	0	false	0	ENSG00000245552	0
21.9314891028217	2.0	0.0	0.5	0.0	3	1	LINC01550	lncRNA	0	false	-2.09646978451337	ENSG00000246223	388011	3.0	1	0.0100142111177391	0	false	0	ENSG00000246223	0
15.9575307224845	2.5	0.0	0.4	0.0	4	1	PRKCH-AS1	lncRNA	0	false	-2.21435760888927	ENSG00000247287		2.0	1	0.0339705880527506	0	false	0	ENSG00000247287	0
69.9457707506772	2.5	0.0	0.4	0.0	4	1	RRN3P1	transcribed_unprocessed_pseudogene	0	false	-1.17934706462527	ENSG00000248124		3.0	1	0.0244891234798127	0	false	0	ENSG00000248124	0
9.72484802420963	1.5	0.0	0.6666666666666666	0.0	2	1	LINC01088	lncRNA	0	false	-2.3693913880195	ENSG00000249307	100505875	3.0	1	0.0489256885395546	0	false	0	ENSG00000249307	0
248.865296694964	9.0	0.0	0.1111111111111111	0.0	17	1	CLN8-AS1	lncRNA	0	false	-1.48406085155169	ENSG00000253982	101927752	2.0	1	0.0418801334971289	0	false	0	ENSG00000253982	0
22.9187877523451	4.5	0.019921386304558947	0.2222222222222222	0.0	8	2	POLR2J3	protein_coding	1	false	0.183801264509407	ENSG00000285437	548644	3.0	1	0.889008346053322	0	false	0	ENSG00000285437	23344
2049.55555780911	12.5	0.040368456894741965	0.08	0.0	24	2	PECAM1	protein_coding	1	false	0.317093656330238	ENSG00000261371	5175	2.0	1	0.664810315566428	0	false	0	ENSG00000261371	47304
640.178674317108	4.0	0.0	0.25	0.0	7	1	AC130456.3	lncRNA	0	false	-2.14584512278371	ENSG00000260592		2.0	1	0.0101101130496421	0	false	0	ENSG00000260592	0
159.193295035583	9.5	0.0	0.10526315789473684	0.0	18	1	TIMM23	protein_coding	0	false	-1.27651371865891	ENSG00000265354	100287932	2.0	1	0.0254843422236275	0	false	0	ENSG00000265354	0
13.8749936528289	4.5	0.4762016920889635	0.2222222222222222	0.0	8	2	NBPF19	protein_coding	1	false	0.590142141306644	ENSG00000271383	101060226	3.0	1	0.763986887058305	0	false	0	ENSG00000271383	558016
167.605032603382	2.0	0.0	0.5	0.0	3	1	SNHG22	lncRNA	0	false	-1.24658663146871	ENSG00000267322		112.0	1	0.0419788580739595	0	false	0	ENSG00000267322	0
74.2286898568291	2.0	0.0	0.5	0.0	3	1	H2AC15	protein_coding	0	false	-1.30348789478256	ENSG00000275221	8330	112.0	1	0.0122106623654058	0	false	0	ENSG00000275221	0
21.2119950806385	7.5	0.0	0.13333333333333333	0.0	14	1	FCGBP	protein_coding	0	false	-2.40016687633903	ENSG00000275395	8857	2.0	1	0.0173597857917845	0	false	0	ENSG00000275395	0
102.833268971126	2.0	0.0	0.5	0.0	3	1	TUBGCP5	protein_coding	0	false	-1.4638146545335	ENSG00000275835	114791	112.0	1	0.00486321488350152	0	false	0	ENSG00000275835	0
451.032850357219	18.0	0.0	0.05555555555555555	0.0	35	1	TRAC	TR_C_gene	0	false	-1.13323947036153	ENSG00000277734		2.0	1	0.0432723082610508	0	false	0	ENSG00000277734	0
