# Supplementary material for: Buffy Coat Transcriptomic Analysis Reveals Alterations in Host Cell Protein Synthesis and Cell Cycle in Severe COVID-19 Patients
Source: Int J Mol Sci. 2022 Nov 5;23(21):13588. doi: 10.3390/ijms232113588 (PMC9659271; doi:10.3390/ijms232113588)
Supplement: Supplementary file 1 [file ijms-23-13588-s001.zip › Table S5.ods]

## Sheet: Table S5
Table S5. Gene ontology biological processes enrichment analysis of the genes from interactive network of the FBL connected to all DEGs.
GOBPID	Pvalue	OddsRatio	ExpCount	Count	Size	Term	Gene ratio
GO:1903984	0.000601055209177485	Inf	0.25332478769428	3	3	positive regulation of TRAIL-activated apoptotic signaling pathway	1
GO:0019043	0.00712625368651786	Inf	0.168883191796187	2	2	establishment of viral latency	1
GO:0033277	0.00712625368651786	Inf	0.168883191796187	2	2	abortive mitotic cell cycle	1
GO:0036048	0.00712625368651786	Inf	0.168883191796187	2	2	protein desuccinylation	1
GO:0036049	0.00712625368651786	Inf	0.168883191796187	2	2	peptidyl-lysine desuccinylation	1
GO:0036245	0.00712625368651786	Inf	0.168883191796187	2	2	cellular response to menadione	1
GO:0038178	0.00712625368651786	Inf	0.168883191796187	2	2	complement component C5a signaling pathway	1
GO:0042495	0.00712625368651786	Inf	0.168883191796187	2	2	detection of triacyl bacterial lipopeptide	1
GO:0051548	0.00712625368651786	Inf	0.168883191796187	2	2	negative regulation of keratinocyte migration	1
GO:0060279	0.00712625368651786	Inf	0.168883191796187	2	2	positive regulation of ovulation	1
GO:0061698	0.00712625368651786	Inf	0.168883191796187	2	2	protein deglutarylation	1
GO:0061699	0.00712625368651786	Inf	0.168883191796187	2	2	peptidyl-lysine deglutarylation	1
GO:0070946	0.00712625368651786	Inf	0.168883191796187	2	2	neutrophil-mediated killing of gram-positive bacterium	1
GO:0071963	0.00712625368651786	Inf	0.168883191796187	2	2	establishment or maintenance of cell polarity regulating cell shape	1
GO:0099554	0.00712625368651786	Inf	0.168883191796187	2	2	trans-synaptic signaling by soluble gas, modulating synaptic transmission	1
GO:0099555	0.00712625368651786	Inf	0.168883191796187	2	2	trans-synaptic signaling by nitric oxide, modulating synaptic transmission	1
GO:0021678	0.00225222322131217	32.5874524714829	0.337766383592373	3	4	third ventricle development	0.75
GO:0032487	0.00225222322131217	32.5874524714829	0.337766383592373	3	4	regulation of Rap protein signal transduction	0.75
GO:0120229	0.00225222322131217	32.5874524714829	0.337766383592373	3	4	protein localization to motile cilium	0.75
GO:2000097	0.00225222322131217	32.5874524714829	0.337766383592373	3	4	regulation of smooth muscle cell-matrix adhesion	0.75
GO:1990314	2.41249503807378e-05	21.7638095238095	0.759974363082839	6	9	cellular response to insulin-like growth factor stimulus	0.666666666666667
GO:0002277	0.0201766506411986	21.7112096263458	0.25332478769428	2	3	myeloid dendritic cell activation involved in immune response	0.666666666666667
GO:0002538	0.0201766506411986	21.7112096263458	0.25332478769428	2	3	arachidonic acid metabolite production involved in inflammatory response	0.666666666666667
GO:0002540	0.0201766506411986	21.7112096263458	0.25332478769428	2	3	leukotriene production involved in inflammatory response	0.666666666666667
GO:0003150	0.0201766506411986	21.7112096263458	0.25332478769428	2	3	muscular septum morphogenesis	0.666666666666667
GO:0003340	0.0201766506411986	21.7112096263458	0.25332478769428	2	3	negative regulation of mesenchymal to epithelial transition involved in metanephros morphogenesis	0.666666666666667
GO:0006014	0.0201766506411986	21.7112096263458	0.25332478769428	2	3	D-ribose metabolic process	0.666666666666667
GO:0010266	0.0201766506411986	21.7112096263458	0.25332478769428	2	3	response to vitamin B1	0.666666666666667
GO:0015722	0.0201766506411986	21.7112096263458	0.25332478769428	2	3	canalicular bile acid transport	0.666666666666667
GO:0016480	0.0201766506411986	21.7112096263458	0.25332478769428	2	3	negative regulation of transcription by RNA polymerase III	0.666666666666667
GO:0030185	0.0201766506411986	21.7112096263458	0.25332478769428	2	3	nitric oxide transport	0.666666666666667
GO:0030389	0.0201766506411986	21.7112096263458	0.25332478769428	2	3	fructosamine metabolic process	0.666666666666667
GO:0030997	0.0201766506411986	21.7112096263458	0.25332478769428	2	3	regulation of centriole-centriole cohesion	0.666666666666667
GO:0042078	0.0201766506411986	21.7112096263458	0.25332478769428	2	3	germ-line stem cell division	0.666666666666667
GO:0042271	0.0201766506411986	21.7112096263458	0.25332478769428	2	3	susceptibility to natural killer cell mediated cytotoxicity	0.666666666666667
GO:0042904	0.0201766506411986	21.7112096263458	0.25332478769428	2	3	9-cis-retinoic acid biosynthetic process	0.666666666666667
GO:0042905	0.0201766506411986	21.7112096263458	0.25332478769428	2	3	9-cis-retinoic acid metabolic process	0.666666666666667
GO:0046882	0.0201766506411986	21.7112096263458	0.25332478769428	2	3	negative regulation of follicle-stimulating hormone secretion	0.666666666666667
GO:0048133	0.0201766506411986	21.7112096263458	0.25332478769428	2	3	male germ-line stem cell asymmetric division	0.666666666666667
GO:0048294	0.0201766506411986	21.7112096263458	0.25332478769428	2	3	negative regulation of isotype switching to IgE isotypes	0.666666666666667
GO:0060024	0.0201766506411986	21.7112096263458	0.25332478769428	2	3	rhythmic synaptic transmission	0.666666666666667
GO:0060168	0.0201766506411986	21.7112096263458	0.25332478769428	2	3	positive regulation of adenosine receptor signaling pathway	0.666666666666667
GO:0060278	0.0201766506411986	21.7112096263458	0.25332478769428	2	3	regulation of ovulation	0.666666666666667
GO:0060671	0.0201766506411986	21.7112096263458	0.25332478769428	2	3	epithelial cell differentiation involved in embryonic placenta development	0.666666666666667
GO:0060672	0.0201766506411986	21.7112096263458	0.25332478769428	2	3	epithelial cell morphogenesis involved in placental branching	0.666666666666667
GO:0070340	0.0201766506411986	21.7112096263458	0.25332478769428	2	3	detection of bacterial lipopeptide	0.666666666666667
GO:0071725	0.0201766506411986	21.7112096263458	0.25332478769428	2	3	response to triacyl bacterial lipopeptide	0.666666666666667
GO:0071727	0.0201766506411986	21.7112096263458	0.25332478769428	2	3	cellular response to triacyl bacterial lipopeptide	0.666666666666667
GO:0072338	0.0201766506411986	21.7112096263458	0.25332478769428	2	3	cellular lactam metabolic process	0.666666666666667
GO:0072717	0.0201766506411986	21.7112096263458	0.25332478769428	2	3	cellular response to actinomycin D	0.666666666666667
GO:0098722	0.0201766506411986	21.7112096263458	0.25332478769428	2	3	asymmetric stem cell division	0.666666666666667
GO:0098728	0.0201766506411986	21.7112096263458	0.25332478769428	2	3	germline stem cell asymmetric division	0.666666666666667
GO:0099163	0.0201766506411986	21.7112096263458	0.25332478769428	2	3	synaptic signaling by nitric oxide	0.666666666666667
GO:0099543	0.0201766506411986	21.7112096263458	0.25332478769428	2	3	trans-synaptic signaling by soluble gas	0.666666666666667
GO:0099548	0.0201766506411986	21.7112096263458	0.25332478769428	2	3	trans-synaptic signaling by nitric oxide	0.666666666666667
GO:1902499	0.0201766506411986	21.7112096263458	0.25332478769428	2	3	positive regulation of protein autoubiquitination	0.666666666666667
GO:1903012	0.0201766506411986	21.7112096263458	0.25332478769428	2	3	positive regulation of bone development	0.666666666666667
GO:1903765	0.0201766506411986	21.7112096263458	0.25332478769428	2	3	negative regulation of potassium ion export across plasma membrane	0.666666666666667
GO:1904425	0.0201766506411986	21.7112096263458	0.25332478769428	2	3	negative regulation of GTP binding	0.666666666666667
GO:1905463	0.0201766506411986	21.7112096263458	0.25332478769428	2	3	negative regulation of DNA duplex unwinding	0.666666666666667
GO:1990502	0.0201766506411986	21.7112096263458	0.25332478769428	2	3	dense core granule maturation	0.666666666666667
GO:2000286	0.0201766506411986	21.7112096263458	0.25332478769428	2	3	receptor internalization involved in canonical Wnt signaling pathway	0.666666666666667
GO:2000468	0.0201766506411986	21.7112096263458	0.25332478769428	2	3	regulation of peroxidase activity	0.666666666666667
GO:1904491	0.000192256024193159	18125	0.675532767184746	5	8	protein localization to ciliary transition zone	625
GO:0031581	0.00527617438280592	16.2927756653992	0.422207979490466	3	5	hemidesmosome assembly	0.6
GO:0036476	0.00527617438280592	16.2927756653992	0.422207979490466	3	5	neuron death in response to hydrogen peroxide	0.6
GO:0051097	0.00527617438280592	16.2927756653992	0.422207979490466	3	5	negative regulation of helicase activity	0.6
GO:0060605	0.00527617438280592	16.2927756653992	0.422207979490466	3	5	tube lumen cavitation	0.6
GO:0060662	0.00527617438280592	16.2927756653992	0.422207979490466	3	5	salivary gland cavitation	0.6
GO:0071680	0.00527617438280592	16.2927756653992	0.422207979490466	3	5	response to indole-3-methanol	0.6
GO:0071681	0.00527617438280592	16.2927756653992	0.422207979490466	3	5	cellular response to indole-3-methanol	0.6
GO:0072656	0.00527617438280592	16.2927756653992	0.422207979490466	3	5	maintenance of protein location in mitochondrion	0.6
GO:0098735	0.00527617438280592	16.2927756653992	0.422207979490466	3	5	positive regulation of the force of heart contraction	0.6
GO:1903207	0.00527617438280592	16.2927756653992	0.422207979490466	3	5	regulation of hydrogen peroxide-induced neuron death	0.6
GO:1903208	0.00527617438280592	16.2927756653992	0.422207979490466	3	5	negative regulation of hydrogen peroxide-induced neuron death	0.6
GO:2001205	0.00527617438280592	16.2927756653992	0.422207979490466	3	5	negative regulation of osteoclast development	0.6
GO:0033540	0.000212313258661752	10.88	1.01329915077712	6	12	fatty acid beta-oxidation using acyl-CoA oxidase	0.5
GO:2001204	0.000212313258661752	10.88	1.01329915077712	6	12	regulation of osteoclast development	0.5
GO:0051256	0.00268636909204308	10.8674698795181	0.675532767184746	4	8	mitotic spindle midzone assembly	0.5
GO:0009136	0.009891208299179	10.861216730038	0.506649575388559	3	6	purine nucleoside diphosphate biosynthetic process	0.5
GO:0009180	0.009891208299179	10.861216730038	0.506649575388559	3	6	purine ribonucleoside diphosphate biosynthetic process	0.5
GO:0035744	0.009891208299179	10.861216730038	0.506649575388559	3	6	T-helper 1 cell cytokine production	0.5
GO:0036438	0.009891208299179	10.861216730038	0.506649575388559	3	6	maintenance of lens transparency	0.5
GO:0060770	0.009891208299179	10.861216730038	0.506649575388559	3	6	negative regulation of epithelial cell proliferation involved in prostate gland development	0.5
GO:0061302	0.009891208299179	10.861216730038	0.506649575388559	3	6	smooth muscle cell-matrix adhesion	0.5
GO:0071455	0.009891208299179	10.861216730038	0.506649575388559	3	6	cellular response to hyperoxia	0.5
GO:1901401	0.009891208299179	10.861216730038	0.506649575388559	3	6	regulation of tetrapyrrole metabolic process	0.5
GO:1901727	0.009891208299179	10.861216730038	0.506649575388559	3	6	positive regulation of histone deacetylase activity	0.5
GO:1902803	0.009891208299179	10.861216730038	0.506649575388559	3	6	regulation of synaptic vesicle transport	0.5
GO:1903121	0.009891208299179	10.861216730038	0.506649575388559	3	6	regulation of TRAIL-activated apoptotic signaling pathway	0.5
GO:1903147	0.009891208299179	10.861216730038	0.506649575388559	3	6	negative regulation of autophagy of mitochondrion	0.5
GO:1990962	0.009891208299179	10.861216730038	0.506649575388559	3	6	xenobiotic transport across blood-brain barrier	0.5
GO:2000143	0.009891208299179	10.861216730038	0.506649575388559	3	6	negative regulation of DNA-templated transcription, initiation	0.5
GO:2000554	0.009891208299179	10.861216730038	0.506649575388559	3	6	regulation of T-helper 1 cell cytokine production	0.5
GO:2000556	0.009891208299179	10.861216730038	0.506649575388559	3	6	positive regulation of T-helper 1 cell cytokine production	0.5
GO:0001766	0.038101078061085	10.85497150095	0.337766383592373	2	4	membrane raft polarization	0.5
GO:0001920	0.038101078061085	10.85497150095	0.337766383592373	2	4	negative regulation of receptor recycling	0.5
GO:0002074	0.038101078061085	10.85497150095	0.337766383592373	2	4	extraocular skeletal muscle development	0.5
GO:0002677	0.038101078061085	10.85497150095	0.337766383592373	2	4	negative regulation of chronic inflammatory response	0.5
GO:0003332	0.038101078061085	10.85497150095	0.337766383592373	2	4	negative regulation of extracellular matrix constituent secretion	0.5
GO:0006273	0.038101078061085	10.85497150095	0.337766383592373	2	4	lagging strand elongation	0.5
GO:0006772	0.038101078061085	10.85497150095	0.337766383592373	2	4	thiamine metabolic process	0.5
GO:0014005	0.038101078061085	10.85497150095	0.337766383592373	2	4	microglia development	0.5
GO:0018199	0.038101078061085	10.85497150095	0.337766383592373	2	4	peptidyl-glutamine modification	0.5
GO:0019042	0.038101078061085	10.85497150095	0.337766383592373	2	4	viral latency	0.5
GO:0022009	0.038101078061085	10.85497150095	0.337766383592373	2	4	central nervous system vasculogenesis	0.5
GO:0030951	0.038101078061085	10.85497150095	0.337766383592373	2	4	establishment or maintenance of microtubule cytoskeleton polarity	0.5
GO:0031133	0.038101078061085	10.85497150095	0.337766383592373	2	4	regulation of axon diameter	0.5
GO:0032185	0.038101078061085	10.85497150095	0.337766383592373	2	4	septin cytoskeleton organization	0.5
GO:0032289	0.038101078061085	10.85497150095	0.337766383592373	2	4	central nervous system myelin formation	0.5
GO:0034343	0.038101078061085	10.85497150095	0.337766383592373	2	4	type III interferon production	0.5
GO:0034344	0.038101078061085	10.85497150095	0.337766383592373	2	4	regulation of type III interferon production	0.5
GO:0034699	0.038101078061085	10.85497150095	0.337766383592373	2	4	response to luteinizing hormone	0.5
GO:0035063	0.038101078061085	10.85497150095	0.337766383592373	2	4	nuclear speck organization	0.5
GO:0035799	0.038101078061085	10.85497150095	0.337766383592373	2	4	ureter maturation	0.5
GO:0042360	0.038101078061085	10.85497150095	0.337766383592373	2	4	vitamin E metabolic process	0.5
GO:0045728	0.038101078061085	10.85497150095	0.337766383592373	2	4	respiratory burst after phagocytosis	0.5
GO:0051611	0.038101078061085	10.85497150095	0.337766383592373	2	4	regulation of serotonin uptake	0.5
GO:0052040	0.038101078061085	10.85497150095	0.337766383592373	2	4	modulation by symbiont of host programmed cell death	0.5
GO:0060167	0.038101078061085	10.85497150095	0.337766383592373	2	4	regulation of adenosine receptor signaling pathway	0.5
GO:0060300	0.038101078061085	10.85497150095	0.337766383592373	2	4	regulation of cytokine activity	0.5
GO:0060574	0.038101078061085	10.85497150095	0.337766383592373	2	4	intestinal epithelial cell maturation	0.5
GO:0060699	0.038101078061085	10.85497150095	0.337766383592373	2	4	regulation of endoribonuclease activity	0.5
GO:0060916	0.038101078061085	10.85497150095	0.337766383592373	2	4	mesenchymal cell proliferation involved in lung development	0.5
GO:0060935	0.038101078061085	10.85497150095	0.337766383592373	2	4	cardiac fibroblast cell differentiation	0.5
GO:0060936	0.038101078061085	10.85497150095	0.337766383592373	2	4	cardiac fibroblast cell development	0.5
GO:0060938	0.038101078061085	10.85497150095	0.337766383592373	2	4	epicardium-derived cardiac fibroblast cell differentiation	0.5
GO:0060939	0.038101078061085	10.85497150095	0.337766383592373	2	4	epicardium-derived cardiac fibroblast cell development	0.5
GO:0060978	0.038101078061085	10.85497150095	0.337766383592373	2	4	angiogenesis involved in coronary vascular morphogenesis	0.5
GO:0061073	0.038101078061085	10.85497150095	0.337766383592373	2	4	ciliary body morphogenesis	0.5
GO:0061792	0.038101078061085	10.85497150095	0.337766383592373	2	4	secretory granule maturation	0.5
GO:0070164	0.038101078061085	10.85497150095	0.337766383592373	2	4	negative regulation of adiponectin secretion	0.5
GO:0071307	0.038101078061085	10.85497150095	0.337766383592373	2	4	cellular response to vitamin K	0.5
GO:0071881	0.038101078061085	10.85497150095	0.337766383592373	2	4	adenylate cyclase-inhibiting adrenergic receptor signaling pathway	0.5
GO:0072716	0.038101078061085	10.85497150095	0.337766383592373	2	4	response to actinomycin D	0.5
GO:0090669	0.038101078061085	10.85497150095	0.337766383592373	2	4	telomerase RNA stabilization	0.5
GO:0097029	0.038101078061085	10.85497150095	0.337766383592373	2	4	mature conventional dendritic cell differentiation	0.5
GO:0097368	0.038101078061085	10.85497150095	0.337766383592373	2	4	establishment of Sertoli cell barrier	0.5
GO:0097752	0.038101078061085	10.85497150095	0.337766383592373	2	4	regulation of DNA stability	0.5
GO:1900126	0.038101078061085	10.85497150095	0.337766383592373	2	4	negative regulation of hyaluronan biosynthetic process	0.5
GO:1901403	0.038101078061085	10.85497150095	0.337766383592373	2	4	positive regulation of tetrapyrrole metabolic process	0.5
GO:1901610	0.038101078061085	10.85497150095	0.337766383592373	2	4	positive regulation of vesicle transport along microtubule	0.5
GO:1902685	0.038101078061085	10.85497150095	0.337766383592373	2	4	positive regulation of receptor localization to synapse	0.5
GO:1903553	0.038101078061085	10.85497150095	0.337766383592373	2	4	positive regulation of extracellular exosome assembly	0.5
GO:1903575	0.038101078061085	10.85497150095	0.337766383592373	2	4	cornified envelope assembly	0.5
GO:1904823	0.038101078061085	10.85497150095	0.337766383592373	2	4	purine nucleobase transmembrane transport	0.5
GO:1905448	0.038101078061085	10.85497150095	0.337766383592373	2	4	positive regulation of mitochondrial ATP synthesis coupled electron transport	0.5
GO:1990258	0.038101078061085	10.85497150095	0.337766383592373	2	4	histone glutamine methylation	0.5
GO:1990785	0.038101078061085	10.85497150095	0.337766383592373	2	4	response to water-immersion restraint stress	0.5
GO:2000015	0.038101078061085	10.85497150095	0.337766383592373	2	4	regulation of determination of dorsal identity	0.5
GO:2000295	0.038101078061085	10.85497150095	0.337766383592373	2	4	regulation of hydrogen peroxide catabolic process	0.5
GO:2000741	0.038101078061085	10.85497150095	0.337766383592373	2	4	positive regulation of mesenchymal stem cell differentiation	0.5
GO:0070207	0.00010587618644715	9.52493646759848	1.2666239384714	7	15	protein homotrimerization	0.466666666666667
GO:0060670	0.000366135272508314	9.32517006802721	1.09774074667521	6	13	branching involved in labyrinthine layer morphogenesis	0.461538461538462
GO:0070944	0.00127762342720982	9.06091370558376	0.928857554879026	5	11	neutrophil-mediated killing of bacterium	0.454545454545455
GO:0000022	0.0045135284725106	8.69346861128725	0.759974363082839	4	9	mitotic spindle elongation	0.444444444444444
GO:0007135	0.0045135284725106	8.69346861128725	0.759974363082839	4	9	meiosis II	0.444444444444444
GO:0045144	0.0045135284725106	8.69346861128725	0.759974363082839	4	9	meiotic sister chromatid segregation	0.444444444444444
GO:0051177	0.0045135284725106	8.69346861128725	0.759974363082839	4	9	meiotic sister chromatid cohesion	0.444444444444444
GO:0051231	0.0045135284725106	8.69346861128725	0.759974363082839	4	9	spindle elongation	0.444444444444444
GO:0061983	0.0045135284725106	8.69346861128725	0.759974363082839	4	9	meiosis II cell cycle process	0.444444444444444
GO:1900244	0.0045135284725106	8.69346861128725	0.759974363082839	4	9	positive regulation of synaptic vesicle endocytosis	0.444444444444444
GO:0002676	0.0162301301049746	8.14543726235742	0.591091171286653	3	7	regulation of chronic inflammatory response	0.428571428571429
GO:0006627	0.0162301301049746	8.14543726235742	0.591091171286653	3	7	protein processing involved in protein targeting to mitochondrion	0.428571428571429
GO:0009188	0.0162301301049746	8.14543726235742	0.591091171286653	3	7	ribonucleoside diphosphate biosynthetic process	0.428571428571429
GO:0015747	0.0162301301049746	8.14543726235742	0.591091171286653	3	7	urate transport	0.428571428571429
GO:0030952	0.0162301301049746	8.14543726235742	0.591091171286653	3	7	establishment or maintenance of cytoskeleton polarity	0.428571428571429
GO:0031622	0.0162301301049746	8.14543726235742	0.591091171286653	3	7	positive regulation of fever generation	0.428571428571429
GO:0033129	0.0162301301049746	8.14543726235742	0.591091171286653	3	7	positive regulation of histone phosphorylation	0.428571428571429
GO:0034141	0.0162301301049746	8.14543726235742	0.591091171286653	3	7	positive regulation of toll-like receptor 3 signaling pathway	0.428571428571429
GO:0035900	0.0162301301049746	8.14543726235742	0.591091171286653	3	7	response to isolation stress	0.428571428571429
GO:0038165	0.0162301301049746	8.14543726235742	0.591091171286653	3	7	oncostatin-M-mediated signaling pathway	0.428571428571429
GO:0040009	0.0162301301049746	8.14543726235742	0.591091171286653	3	7	regulation of growth rate	0.428571428571429
GO:0045003	0.0162301301049746	8.14543726235742	0.591091171286653	3	7	double-strand break repair via synthesis-dependent strand annealing	0.428571428571429
GO:0045110	0.0162301301049746	8.14543726235742	0.591091171286653	3	7	intermediate filament bundle assembly	0.428571428571429
GO:0046719	0.0162301301049746	8.14543726235742	0.591091171286653	3	7	regulation by virus of viral protein levels in host cell	0.428571428571429
GO:0060087	0.0162301301049746	8.14543726235742	0.591091171286653	3	7	relaxation of vascular associated smooth muscle	0.428571428571429
GO:0071494	0.0162301301049746	8.14543726235742	0.591091171286653	3	7	cellular response to UV-C	0.428571428571429
GO:1903010	0.0162301301049746	8.14543726235742	0.591091171286653	3	7	regulation of bone development	0.428571428571429
GO:1905446	0.0162301301049746	8.14543726235742	0.591091171286653	3	7	regulation of mitochondrial ATP synthesis coupled electron transport	0.428571428571429
GO:1990144	0.0162301301049746	8.14543726235742	0.591091171286653	3	7	intrinsic apoptotic signaling pathway in response to hypoxia	0.428571428571429
GO:0044320	8.21859408888412e-05	7.92047621799688	1.60439032206377	8	19	cellular response to leptin stimulus	0.421052631578947
GO:0021670	0.00203855926188701	7.76604423495286	1.01329915077712	5	12	lateral ventricle development	0.416666666666667
GO:0070943	0.00203855926188701	7.76604423495286	1.01329915077712	5	12	neutrophil-mediated killing of symbiont cell	0.416666666666667
GO:0070206	0.000275096450297619	7.61905972045743	1.43550713026759	7	17	protein trimerization	0.411764705882353
GO:0035907	0.00702330967666834	7.24413443246671	0.844415958980933	4	10	dorsal aorta development	0.4
GO:0044557	0.00702330967666834	7.24413443246671	0.844415958980933	4	10	relaxation of smooth muscle	0.4
GO:0060768	0.00702330967666834	7.24413443246671	0.844415958980933	4	10	regulation of epithelial cell proliferation involved in prostate gland development	0.4
GO:0061179	0.00702330967666834	7.24413443246671	0.844415958980933	4	10	negative regulation of insulin secretion involved in cellular response to glucose stimulus	0.4
GO:0098885	0.00702330967666834	7.24413443246671	0.844415958980933	4	10	modification of postsynaptic actin cytoskeleton	0.4
GO:1902946	0.00702330967666834	7.24413443246671	0.844415958980933	4	10	protein localization to early endosome	0.4
GO:1904526	0.00702330967666834	7.24413443246671	0.844415958980933	4	10	regulation of microtubule binding	0.4
GO:2000601	0.00702330967666834	7.24413443246671	0.844415958980933	4	10	positive regulation of Arp2/3 complex-mediated actin nucleation	0.4
GO:0001973	0.00308382425524868	6.7948921319797	1.09774074667521	5	13	G protein-coupled adenosine receptor signaling pathway	0.384615384615385
GO:0002430	0.00308382425524868	6.7948921319797	1.09774074667521	5	13	complement receptor mediated signaling pathway	0.384615384615385
GO:0034982	0.00308382425524868	6.7948921319797	1.09774074667521	5	13	mitochondrial protein processing	0.384615384615385
GO:0035588	0.00308382425524868	6.7948921319797	1.09774074667521	5	13	G protein-coupled purinergic receptor signaling pathway	0.384615384615385
GO:0045741	0.00308382425524868	6.7948921319797	1.09774074667521	5	13	positive regulation of epidermal growth factor-activated receptor activity	0.384615384615385
GO:0003223	0.0243563867127336	6.51596958174905	0.675532767184746	3	8	ventricular compact myocardium morphogenesis	375
GO:0010727	0.0243563867127336	6.51596958174905	0.675532767184746	3	8	negative regulation of hydrogen peroxide metabolic process	375
GO:0010807	0.0243563867127336	6.51596958174905	0.675532767184746	3	8	regulation of synaptic vesicle priming	375
GO:0015949	0.0243563867127336	6.51596958174905	0.675532767184746	3	8	nucleobase-containing small molecule interconversion	375
GO:0032071	0.0243563867127336	6.51596958174905	0.675532767184746	3	8	regulation of endodeoxyribonuclease activity	375
GO:0032471	0.0243563867127336	6.51596958174905	0.675532767184746	3	8	negative regulation of endoplasmic reticulum calcium ion concentration	375
GO:0034139	0.0243563867127336	6.51596958174905	0.675532767184746	3	8	regulation of toll-like receptor 3 signaling pathway	375
GO:0035912	0.0243563867127336	6.51596958174905	0.675532767184746	3	8	dorsal aorta morphogenesis	375
GO:0051045	0.0243563867127336	6.51596958174905	0.675532767184746	3	8	negative regulation of membrane protein ectodomain proteolysis	375
GO:0071493	0.0243563867127336	6.51596958174905	0.675532767184746	3	8	cellular response to UV-B	375
GO:0090045	0.0243563867127336	6.51596958174905	0.675532767184746	3	8	positive regulation of deacetylase activity	375
GO:0090324	0.0243563867127336	6.51596958174905	0.675532767184746	3	8	negative regulation of oxidative phosphorylation	375
GO:0090400	0.0243563867127336	6.51596958174905	0.675532767184746	3	8	stress-induced premature senescence	375
GO:0090650	0.0243563867127336	6.51596958174905	0.675532767184746	3	8	cellular response to oxygen-glucose deprivation	375
GO:1900125	0.0243563867127336	6.51596958174905	0.675532767184746	3	8	regulation of hyaluronan biosynthetic process	375
GO:1902746	0.0243563867127336	6.51596958174905	0.675532767184746	3	8	regulation of lens fiber cell differentiation	375
GO:1902965	0.0243563867127336	6.51596958174905	0.675532767184746	3	8	regulation of protein localization to early endosome	375
GO:1902966	0.0243563867127336	6.51596958174905	0.675532767184746	3	8	positive regulation of protein localization to early endosome	375
GO:0031065	0.00061303804684709	6.34847522236341	1.60439032206377	7	19	positive regulation of histone deacetylation	0.368421052631579
GO:1903204	0.00061303804684709	6.34847522236341	1.60439032206377	7	19	negative regulation of oxidative stress-induced neuron death	0.368421052631579
GO:0039530	0.0103065589620732	6.20889573330918	0.928857554879026	4	11	MDA-5 signaling pathway	0.363636363636364
GO:0060767	0.0103065589620732	6.20889573330918	0.928857554879026	4	11	epithelial cell proliferation involved in prostate gland development	0.363636363636364
GO:0070314	0.0103065589620732	6.20889573330918	0.928857554879026	4	11	G1 to G0 transition	0.363636363636364
GO:0070327	0.0103065589620732	6.20889573330918	0.928857554879026	4	11	thyroid hormone transport	0.363636363636364
GO:0071313	0.0103065589620732	6.20889573330918	0.928857554879026	4	11	cellular response to caffeine	0.363636363636364
GO:0090660	0.0103065589620732	6.20889573330918	0.928857554879026	4	11	cerebrospinal fluid circulation	0.363636363636364
GO:1903423	0.0103065589620732	6.20889573330918	0.928857554879026	4	11	positive regulation of synaptic vesicle recycling	0.363636363636364
GO:1990440	0.0103065589620732	6.20889573330918	0.928857554879026	4	11	positive regulation of transcription from RNA polymerase II promoter in response to endoplasmic reticulum stress	0.363636363636364
GO:0036295	0.00446647414628359	6.03955160744501	1.18218234257331	5	14	cellular response to increased oxygen levels	0.357142857142857
GO:0070942	0.00446647414628359	6.03955160744501	1.18218234257331	5	14	neutrophil mediated cytotoxicity	0.357142857142857
GO:0071236	0.00446647414628359	6.03955160744501	1.18218234257331	5	14	cellular response to antibiotic	0.357142857142857
GO:0072531	0.00446647414628359	6.03955160744501	1.18218234257331	5	14	pyrimidine-containing compound transmembrane transport	0.357142857142857
GO:0036035	0.00196593481747051	5.93281385281385	1.43550713026759	6	17	osteoclast development	0.352941176470588
GO:0034643	0.000177152246117753	5.767287831163	2.19548149335042	9	26	establishment of mitochondrion localization, microtubule-mediated	0.346153846153846
GO:0047497	0.000177152246117753	5.767287831163	2.19548149335042	9	26	mitochondrion transport along microtubule	0.346153846153846
GO:0051654	8.03579595410054e-05	5.73654058762438	2.4488062810447	10	29	establishment of mitochondrion localization	0.344827586206897
GO:0044321	0.00054539684342598	5.44373808010172	2.02659830155424	8	24	response to leptin	0.333333333333333
GO:0019896	0.00274017174861664	5.43809523809524	1.51994872616568	6	18	axonal transport of mitochondrion	0.333333333333333
GO:0015671	0.00623912457208622	5.43527918781726	1.2666239384714	5	15	oxygen transport	0.333333333333333
GO:0032486	0.00623912457208622	5.43527918781726	1.2666239384714	5	15	Rap protein signal transduction	0.333333333333333
GO:0051127	0.00623912457208622	5.43527918781726	1.2666239384714	5	15	positive regulation of actin nucleation	0.333333333333333
GO:1904424	0.00623912457208622	5.43527918781726	1.2666239384714	5	15	regulation of GTP binding	0.333333333333333
GO:2000104	0.00623912457208622	5.43527918781726	1.2666239384714	5	15	negative regulation of DNA-dependent DNA replication	0.333333333333333
GO:0032780	0.0144405588121663	5.43246670894103	1.01329915077712	4	12	negative regulation of ATPase activity	0.333333333333333
GO:0032782	0.0144405588121663	5.43246670894103	1.01329915077712	4	12	bile acid secretion	0.333333333333333
GO:0034145	0.0144405588121663	5.43246670894103	1.01329915077712	4	12	positive regulation of toll-like receptor 4 signaling pathway	0.333333333333333
GO:0038203	0.0144405588121663	5.43246670894103	1.01329915077712	4	12	TORC2 signaling	0.333333333333333
GO:0051255	0.0144405588121663	5.43246670894103	1.01329915077712	4	12	spindle midzone assembly	0.333333333333333
GO:0060287	0.0144405588121663	5.43246670894103	1.01329915077712	4	12	epithelial cilium movement involved in determination of left/right asymmetry	0.333333333333333
GO:0090557	0.0144405588121663	5.43246670894103	1.01329915077712	4	12	establishment of endothelial intestinal barrier	0.333333333333333
GO:0098911	0.0144405588121663	5.43246670894103	1.01329915077712	4	12	regulation of ventricular cardiac muscle cell action potential	0.333333333333333
GO:0006265	0.0342778158328451	5.42965779467681	0.759974363082839	3	9	DNA topological change	0.333333333333333
GO:0006924	0.0342778158328451	5.42965779467681	0.759974363082839	3	9	activation-induced cell death of T cells	0.333333333333333
GO:0006930	0.0342778158328451	5.42965779467681	0.759974363082839	3	9	substrate-dependent cell migration, cell extension	0.333333333333333
GO:0014012	0.0342778158328451	5.42965779467681	0.759974363082839	3	9	peripheral nervous system axon regeneration	0.333333333333333
GO:0031620	0.0342778158328451	5.42965779467681	0.759974363082839	3	9	regulation of fever generation	0.333333333333333
GO:0036480	0.0342778158328451	5.42965779467681	0.759974363082839	3	9	neuron intrinsic apoptotic signaling pathway in response to oxidative stress	0.333333333333333
GO:0038171	0.0342778158328451	5.42965779467681	0.759974363082839	3	9	cannabinoid signaling pathway	0.333333333333333
GO:0046085	0.0342778158328451	5.42965779467681	0.759974363082839	3	9	adenosine metabolic process	0.333333333333333
GO:0046602	0.0342778158328451	5.42965779467681	0.759974363082839	3	9	regulation of mitotic centrosome separation	0.333333333333333
GO:0048478	0.0342778158328451	5.42965779467681	0.759974363082839	3	9	replication fork protection	0.333333333333333
GO:0060267	0.0342778158328451	5.42965779467681	0.759974363082839	3	9	positive regulation of respiratory burst	0.333333333333333
GO:0060700	0.0342778158328451	5.42965779467681	0.759974363082839	3	9	regulation of ribonuclease activity	0.333333333333333
GO:0071476	0.0342778158328451	5.42965779467681	0.759974363082839	3	9	cellular hypotonic response	0.333333333333333
GO:0098779	0.0342778158328451	5.42965779467681	0.759974363082839	3	9	positive regulation of mitophagy in response to mitochondrial depolarization	0.333333333333333
GO:0140627	0.0342778158328451	5.42965779467681	0.759974363082839	3	9	ubiquitin-dependent protein catabolic process via the C-end degron rule pathway	0.333333333333333
GO:1901856	0.0342778158328451	5.42965779467681	0.759974363082839	3	9	negative regulation of cellular respiration	0.333333333333333
GO:1902774	0.0342778158328451	5.42965779467681	0.759974363082839	3	9	late endosome to lysosome transport	0.333333333333333
GO:1903376	0.0342778158328451	5.42965779467681	0.759974363082839	3	9	regulation of oxidative stress-induced neuron intrinsic apoptotic signaling pathway	0.333333333333333
GO:1903431	0.0342778158328451	5.42965779467681	0.759974363082839	3	9	positive regulation of cell maturation	0.333333333333333
GO:1903596	0.0342778158328451	5.42965779467681	0.759974363082839	3	9	regulation of gap junction assembly	0.333333333333333
GO:1905097	0.0342778158328451	5.42965779467681	0.759974363082839	3	9	regulation of guanyl-nucleotide exchange factor activity	0.333333333333333
GO:2000833	0.0342778158328451	5.42965779467681	0.759974363082839	3	9	positive regulation of steroid hormone secretion	0.333333333333333
GO:0071480	0.000152164229029079	5.1895971628626	2.61768947284089	10	31	cellular response to gamma radiation	0.32258064516129
GO:0000028	0.00372192576481796	5.01948717948718	1.60439032206377	6	19	ribosomal small subunit assembly	0.315789473684211
GO:0010759	0.00372192576481796	5.01948717948718	1.60439032206377	6	19	positive regulation of macrophage chemotaxis	0.315789473684211
GO:0032695	0.00372192576481796	5.01948717948718	1.60439032206377	6	19	negative regulation of interleukin-12 production	0.315789473684211
GO:0042744	0.000204695776207248	4.95341704762456	2.70213106873898	10	32	hydrogen peroxide catabolic process	0.3125
GO:0002713	0.00845274104351683	4.9408744808491	1.35106553436949	5	16	negative regulation of B cell mediated immunity	0.3125
GO:0002890	0.00845274104351683	4.9408744808491	1.35106553436949	5	16	negative regulation of immunoglobulin mediated immune response	0.3125
GO:0006978	0.00845274104351683	4.9408744808491	1.35106553436949	5	16	DNA damage response, signal transduction by p53 class mediator resulting in transcription of p21 class mediator	0.3125
GO:0033631	0.00845274104351683	4.9408744808491	1.35106553436949	5	16	cell-cell adhesion mediated by integrin	0.3125
GO:0050862	0.00845274104351683	4.9408744808491	1.35106553436949	5	16	positive regulation of T cell receptor signaling pathway	0.3125
GO:0061515	4.55136555540252e-08	4.92264795591104	5.99535330876462	22	71	myeloid cell development	0.309859154929577
GO:0032494	0.0194879963930186	4.8285774677658	1.09774074667521	4	13	response to peptidoglycan	0.307692307692308
GO:0034112	0.0194879963930186	4.8285774677658	1.09774074667521	4	13	positive regulation of homotypic cell-cell adhesion	0.307692307692308
GO:0042541	0.0194879963930186	4.8285774677658	1.09774074667521	4	13	hemoglobin biosynthetic process	0.307692307692308
GO:0046689	0.0194879963930186	4.8285774677658	1.09774074667521	4	13	response to mercury ion	0.307692307692308
GO:0051988	0.0194879963930186	4.8285774677658	1.09774074667521	4	13	regulation of attachment of spindle microtubules to kinetochore	0.307692307692308
GO:0098814	0.0194879963930186	4.8285774677658	1.09774074667521	4	13	spontaneous synaptic transmission	0.307692307692308
GO:1902043	0.0194879963930186	4.8285774677658	1.09774074667521	4	13	positive regulation of extrinsic apoptotic signaling pathway via death domain receptors	0.307692307692308
GO:0002082	0.0022095133524362	4.76024459974587	1.94215670565614	7	23	regulation of oxidative phosphorylation	0.304347826086957
GO:1903579	0.00059545063132727	4.66766630316249	2.5332478769428	9	30	negative regulation of ATP metabolic process	0.3
GO:0015669	0.0049421110052812	4.66068027210884	1.68883191796187	6	20	gas transport	0.3
GO:0071397	0.0049421110052812	4.66068027210884	1.68883191796187	6	20	cellular response to cholesterol	0.3
GO:0090201	0.0049421110052812	4.66068027210884	1.68883191796187	6	20	negative regulation of release of cytochrome c from mitochondria	0.3
GO:0001553	0.0459583184712066	4.65372080391092	0.844415958980933	3	10	luteinization	0.3
GO:0003330	0.0459583184712066	4.65372080391092	0.844415958980933	3	10	regulation of extracellular matrix constituent secretion	0.3
GO:0006560	0.0459583184712066	4.65372080391092	0.844415958980933	3	10	proline metabolic process	0.3
GO:0009133	0.0459583184712066	4.65372080391092	0.844415958980933	3	10	nucleoside diphosphate biosynthetic process	0.3
GO:0010992	0.0459583184712066	4.65372080391092	0.844415958980933	3	10	ubiquitin recycling	0.3
GO:0016081	0.0459583184712066	4.65372080391092	0.844415958980933	3	10	synaptic vesicle docking	0.3
GO:0032070	0.0459583184712066	4.65372080391092	0.844415958980933	3	10	regulation of deoxyribonuclease activity	0.3
GO:0034356	0.0459583184712066	4.65372080391092	0.844415958980933	3	10	NAD biosynthesis via nicotinamide riboside salvage pathway	0.3
GO:0045792	0.0459583184712066	4.65372080391092	0.844415958980933	3	10	negative regulation of cell size	0.3
GO:0048241	0.0459583184712066	4.65372080391092	0.844415958980933	3	10	epinephrine transport	0.3
GO:0048251	0.0459583184712066	4.65372080391092	0.844415958980933	3	10	elastic fiber assembly	0.3
GO:0061299	0.0459583184712066	4.65372080391092	0.844415958980933	3	10	retina vasculature morphogenesis in camera-type eye	0.3
GO:0070561	0.0459583184712066	4.65372080391092	0.844415958980933	3	10	vitamin D receptor signaling pathway	0.3
GO:0098903	0.0459583184712066	4.65372080391092	0.844415958980933	3	10	regulation of membrane repolarization during action potential	0.3
GO:0098917	0.0459583184712066	4.65372080391092	0.844415958980933	3	10	retrograde trans-synaptic signaling	0.3
GO:1901725	0.0459583184712066	4.65372080391092	0.844415958980933	3	10	regulation of histone deacetylase activity	0.3
GO:1902513	0.0459583184712066	4.65372080391092	0.844415958980933	3	10	regulation of organelle transport along microtubule	0.3
GO:2000048	0.0459583184712066	4.65372080391092	0.844415958980933	3	10	negative regulation of cell-cell adhesion mediated by cadherin	0.3
GO:2000253	0.0459583184712066	4.65372080391092	0.844415958980933	3	10	positive regulation of feeding behavior	0.3
GO:2000510	0.0459583184712066	4.65372080391092	0.844415958980933	3	10	positive regulation of dendritic cell chemotaxis	0.3
GO:2001223	0.0459583184712066	4.65372080391092	0.844415958980933	3	10	negative regulation of neuron migration	0.3
GO:0001958	0.00130998460704419	4.58339746378024	2.27992308924852	8	27	endochondral ossification	0.296296296296296
GO:0036075	0.00130998460704419	4.58339746378024	2.27992308924852	8	27	replacement ossification	0.296296296296296
GO:1903203	0.00130998460704419	4.58339746378024	2.27992308924852	8	27	regulation of oxidative stress-induced neuron death	0.296296296296296
GO:0098751	0.000355951283472462	4.54010184595799	2.87101426053517	10	34	bone cell development	0.294117647058824
GO:0007076	0.0111555769710361	4.52887055837563	1.43550713026759	5	17	mitotic chromosome condensation	0.294117647058824
GO:0020027	0.0111555769710361	4.52887055837563	1.43550713026759	5	17	hemoglobin metabolic process	0.294117647058824
GO:0042772	0.0111555769710361	4.52887055837563	1.43550713026759	5	17	DNA damage response, signal transduction resulting in transcription	0.294117647058824
GO:0043117	0.0111555769710361	4.52887055837563	1.43550713026759	5	17	positive regulation of vascular permeability	0.294117647058824
GO:0046068	0.0111555769710361	4.52887055837563	1.43550713026759	5	17	cGMP metabolic process	0.294117647058824
GO:0048532	0.0111555769710361	4.52887055837563	1.43550713026759	5	17	anatomical structure arrangement	0.294117647058824
GO:0060263	0.0111555769710361	4.52887055837563	1.43550713026759	5	17	regulation of respiratory burst	0.294117647058824
GO:0061298	0.0111555769710361	4.52887055837563	1.43550713026759	5	17	retina vasculature development in camera-type eye	0.294117647058824
GO:0034340	3.59473463951796e-06	4.53366914103924	4.89761256208941	17	58	response to type I interferon	0.293103448275862
GO:0002755	0.00289473779732275	4.47996860751925	2.02659830155424	7	24	MyD88-dependent toll-like receptor signaling pathway	0.291666666666667
GO:0036475	0.000776795068631077	4.45523941707148	2.61768947284089	9	31	neuron death in response to oxidative stress	0.290322580645161
GO:0010332	9.94813826834461e-06	4.37111821086262	4.72872937029322	16	56	response to gamma radiation	0.285714285714286
GO:0018149	0.00046097592605931	4.3582431572247	2.95545585643326	10	35	peptide cross-linking	0.285714285714286
GO:0010575	0.00169979488702788	4.35397329942785	2.36436468514661	8	28	positive regulation of vascular endothelial growth factor production	0.285714285714286
GO:0035455	0.00643202048851235	4.34971428571429	1.77327351385996	6	21	response to interferon-alpha	0.285714285714286
GO:0046597	0.00643202048851235	4.34971428571429	1.77327351385996	6	21	negative regulation of viral entry into host cell	0.285714285714286
GO:0070269	0.00643202048851235	4.34971428571429	1.77327351385996	6	21	pyroptosis	0.285714285714286
GO:0002091	0.0254966052917125	4.34546607482562	1.18218234257331	4	14	negative regulation of receptor internalization	0.285714285714286
GO:0007100	0.0254966052917125	4.34546607482562	1.18218234257331	4	14	mitotic centrosome separation	0.285714285714286
GO:0030213	0.0254966052917125	4.34546607482562	1.18218234257331	4	14	hyaluronan biosynthetic process	0.285714285714286
GO:0031650	0.0254966052917125	4.34546607482562	1.18218234257331	4	14	regulation of heat generation	0.285714285714286
GO:0035563	0.0254966052917125	4.34546607482562	1.18218234257331	4	14	positive regulation of chromatin binding	0.285714285714286
GO:0035641	0.0254966052917125	4.34546607482562	1.18218234257331	4	14	locomotory exploration behavior	0.285714285714286
GO:0043951	0.0254966052917125	4.34546607482562	1.18218234257331	4	14	negative regulation of cAMP-mediated signaling	0.285714285714286
GO:0046348	0.0254966052917125	4.34546607482562	1.18218234257331	4	14	amino sugar catabolic process	0.285714285714286
GO:0070278	0.0254966052917125	4.34546607482562	1.18218234257331	4	14	extracellular matrix constituent secretion	0.285714285714286
GO:0071415	0.0254966052917125	4.34546607482562	1.18218234257331	4	14	cellular response to purine-containing compound	0.285714285714286
GO:1901678	0.0254966052917125	4.34546607482562	1.18218234257331	4	14	iron coordination entity transport	0.285714285714286
GO:1902187	0.0254966052917125	4.34546607482562	1.18218234257331	4	14	negative regulation of viral release from host cell	0.285714285714286
GO:1902969	0.0254966052917125	4.34546607482562	1.18218234257331	4	14	mitotic DNA replication	0.285714285714286
GO:0035456	0.00100066000914475	4.26128443411882	2.70213106873898	9	32	response to interferon-beta	0.28125
GO:0036315	0.00373146479653358	4.23083439220669	2.11103989745233	7	25	cellular response to sterol	0.28
GO:0090312	0.00373146479653358	4.23083439220669	2.11103989745233	7	25	positive regulation of protein deacetylation	0.28
GO:0001956	0.0143922712873513	4.18025185474424	1.51994872616568	5	18	positive regulation of neurotransmitter secretion	0.277777777777778
GO:0021534	0.0143922712873513	4.18025185474424	1.51994872616568	5	18	cell proliferation in hindbrain	0.277777777777778
GO:0030730	0.0143922712873513	4.18025185474424	1.51994872616568	5	18	sequestering of triglyceride	0.277777777777778
GO:0048268	0.0143922712873513	4.18025185474424	1.51994872616568	5	18	clathrin coat assembly	0.277777777777778
GO:0051382	0.0143922712873513	4.18025185474424	1.51994872616568	5	18	kinetochore assembly	0.277777777777778
GO:0042743	1.62441348784441e-05	4.16248288452761	4.89761256208941	16	58	hydrogen peroxide metabolic process	0.275862068965517
GO:0021591	0.00217581033599862	4.14639905548996	2.4488062810447	8	29	ventricular system development	0.275862068965517
GO:0045648	0.00127404248674741	4.08349236641221	2.78657266463708	9	33	positive regulation of erythrocyte differentiation	0.272727272727273
GO:1903146	0.00127404248674741	4.08349236641221	2.78657266463708	9	33	regulation of autophagy of mitochondrion	0.272727272727273
GO:0010310	0.00822284257340064	4.07761904761905	1.85771510975805	6	22	regulation of hydrogen peroxide metabolic process	0.272727272727273
GO:0032069	0.00822284257340064	4.07761904761905	1.85771510975805	6	22	regulation of nuclease activity	0.272727272727273
GO:0046628	0.00822284257340064	4.07761904761905	1.85771510975805	6	22	positive regulation of insulin receptor signaling pathway	0.272727272727273
GO:0048169	0.00822284257340064	4.07761904761905	1.85771510975805	6	22	regulation of long-term neuronal synaptic plasticity	0.272727272727273
GO:0060713	0.00822284257340064	4.07761904761905	1.85771510975805	6	22	labyrinthine layer morphogenesis	0.272727272727273
GO:0071357	7.29435244206315e-05	4.02136163638196	4.39096298670085	14	52	cellular response to type I interferon	0.269230769230769
GO:0002407	0.00473974271075508	4.00792483113756	2.19548149335042	7	26	dendritic cell chemotaxis	0.269230769230769
GO:0060669	0.00473974271075508	4.00792483113756	2.19548149335042	7	26	embryonic placenta morphogenesis	0.269230769230769
GO:1905523	0.00473974271075508	4.00792483113756	2.19548149335042	7	26	positive regulation of macrophage migration	0.269230769230769
GO:0045071	4.34022021874179e-05	3.99518736566676	4.72872937029322	15	56	negative regulation of viral genome replication	0.267857142857143
GO:0045070	0.00275048659224274	3.95769519736462	2.5332478769428	8	30	positive regulation of viral genome replication	0.266666666666667
GO:0000722	0.0324993255533948	3.95019311696547	1.2666239384714	4	15	telomere maintenance via recombination	0.266666666666667
GO:0002070	0.0324993255533948	3.95019311696547	1.2666239384714	4	15	epithelial cell maturation	0.266666666666667
GO:0002679	0.0324993255533948	3.95019311696547	1.2666239384714	4	15	respiratory burst involved in defense response	0.266666666666667
GO:0006098	0.0324993255533948	3.95019311696547	1.2666239384714	4	15	pentose-phosphate shunt	0.266666666666667
GO:0006684	0.0324993255533948	3.95019311696547	1.2666239384714	4	15	sphingomyelin metabolic process	0.266666666666667
GO:0010889	0.0324993255533948	3.95019311696547	1.2666239384714	4	15	regulation of sequestering of triglyceride	0.266666666666667
GO:0033147	0.0324993255533948	3.95019311696547	1.2666239384714	4	15	negative regulation of intracellular estrogen receptor signaling pathway	0.266666666666667
GO:0043518	0.0324993255533948	3.95019311696547	1.2666239384714	4	15	negative regulation of DNA damage response, signal transduction by p53 class mediator	0.266666666666667
GO:0044406	0.0324993255533948	3.95019311696547	1.2666239384714	4	15	adhesion of symbiont to host	0.266666666666667
GO:0045176	0.0324993255533948	3.95019311696547	1.2666239384714	4	15	apical protein localization	0.266666666666667
GO:0045217	0.0324993255533948	3.95019311696547	1.2666239384714	4	15	cell-cell junction maintenance	0.266666666666667
GO:0045986	0.0324993255533948	3.95019311696547	1.2666239384714	4	15	negative regulation of smooth muscle contraction	0.266666666666667
GO:0051299	0.0324993255533948	3.95019311696547	1.2666239384714	4	15	centrosome separation	0.266666666666667
GO:1902902	0.0324993255533948	3.95019311696547	1.2666239384714	4	15	negative regulation of autophagosome assembly	0.266666666666667
GO:1905146	0.0324993255533948	3.95019311696547	1.2666239384714	4	15	lysosomal protein catabolic process	0.266666666666667
GO:0010823	0.000154283773270751	3.93951955782313	4.13763819900657	13	49	negative regulation of mitochondrion organization	0.26530612244898
GO:0002902	0.0182031089739704	3.88143582306019	1.60439032206377	5	19	regulation of B cell apoptotic process	0.263157894736842
GO:0006977	0.0182031089739704	3.88143582306019	1.60439032206377	5	19	DNA damage response, signal transduction by p53 class mediator resulting in cell cycle arrest	0.263157894736842
GO:0008356	0.0182031089739704	3.88143582306019	1.60439032206377	5	19	asymmetric cell division	0.263157894736842
GO:0016082	0.0182031089739704	3.88143582306019	1.60439032206377	5	19	synaptic vesicle priming	0.263157894736842
GO:0030220	0.0182031089739704	3.88143582306019	1.60439032206377	5	19	platelet formation	0.263157894736842
GO:0032026	0.0182031089739704	3.88143582306019	1.60439032206377	5	19	response to magnesium ion	0.263157894736842
GO:0036344	0.0182031089739704	3.88143582306019	1.60439032206377	5	19	platelet morphogenesis	0.263157894736842
GO:0042168	0.000552613248853245	3.86728991164989	3.54654702771992	11	42	heme metabolic process	0.261904761904762
GO:0035929	0.0103451940631528	3.8375350140056	1.94215670565614	6	23	steroid hormone secretion	0.260869565217391
GO:0035994	0.0103451940631528	3.8375350140056	1.94215670565614	6	23	response to muscle stretch	0.260869565217391
GO:0051646	0.000192541606773965	3.83282198014341	4.22207979490466	13	50	mitochondrion localization	0.26
GO:0060337	0.000192541606773965	3.83282198014341	4.22207979490466	13	50	type I interferon signaling pathway	0.26
GO:0006783	0.00594015804705386	3.80730622617535	2.27992308924852	7	27	heme biosynthetic process	0.259259259259259
GO:0010758	0.00594015804705386	3.80730622617535	2.27992308924852	7	27	regulation of macrophage chemotaxis	0.259259259259259
GO:0006779	0.00343698799175986	3.78540037038061	2.61768947284089	8	31	porphyrin-containing compound biosynthetic process	0.258064516129032
GO:0031063	0.00343698799175986	3.78540037038061	2.61768947284089	8	31	regulation of histone deacetylation	0.258064516129032
GO:0033014	0.00343698799175986	3.78540037038061	2.61768947284089	8	31	tetrapyrrole biosynthetic process	0.258064516129032
GO:0070723	0.00343698799175986	3.78540037038061	2.61768947284089	8	31	response to cholesterol	0.258064516129032
GO:0048821	0.00200040972549577	3.76893716970053	2.95545585643326	9	35	erythrocyte development	0.257142857142857
GO:0086005	0.00200040972549577	3.76893716970053	2.95545585643326	9	35	ventricular cardiac muscle cell action potential	0.257142857142857
GO:0070266	0.0014432682170744	3.63080840229153	3.37766383592373	10	40	necroptotic process	0.25
GO:0036314	0.00247038955053777	3.62913486005089	3.03989745233136	9	36	response to sterol	0.25
GO:0051354	0.00247038955053777	3.62913486005089	3.03989745233136	9	36	negative regulation of oxidoreductase activity	0.25
GO:0008156	0.00424909731929822	3.62746344564526	2.70213106873898	8	32	negative regulation of DNA replication	0.25
GO:0034123	0.00735361243372918	3.62579415501906	2.36436468514661	7	28	positive regulation of toll-like receptor signaling pathway	0.25
GO:0035458	0.0128286794850962	3.62412698412698	2.02659830155424	6	24	cellular response to interferon-beta	0.25
GO:0048011	0.0128286794850962	3.62412698412698	2.02659830155424	6	24	neurotrophin TRK receptor signaling pathway	0.25
GO:0051043	0.0128286794850962	3.62412698412698	2.02659830155424	6	24	regulation of membrane protein ectodomain proteolysis	0.25
GO:0051156	0.0128286794850962	3.62412698412698	2.02659830155424	6	24	glucose 6-phosphate metabolic process	0.25
GO:0003159	0.0226234416302001	3.62246192893401	1.68883191796187	5	20	morphogenesis of an endothelium	0.25
GO:0006837	0.0226234416302001	3.62246192893401	1.68883191796187	5	20	serotonin transport	0.25
GO:0061154	0.0226234416302001	3.62246192893401	1.68883191796187	5	20	endothelial tube morphogenesis	0.25
GO:0097503	0.0226234416302001	3.62246192893401	1.68883191796187	5	20	sialylation	0.25
GO:1903206	0.0226234416302001	3.62246192893401	1.68883191796187	5	20	negative regulation of hydrogen peroxide-induced cell death	0.25
GO:0001574	0.0405148537233542	3.62079898541535	1.35106553436949	4	16	ganglioside biosynthetic process	0.25
GO:0001991	0.0405148537233542	3.62079898541535	1.35106553436949	4	16	regulation of systemic arterial blood pressure by circulatory renin-angiotensin	0.25
GO:0002921	0.0405148537233542	3.62079898541535	1.35106553436949	4	16	negative regulation of humoral immune response	0.25
GO:0006740	0.0405148537233542	3.62079898541535	1.35106553436949	4	16	NADPH regeneration	0.25
GO:0010225	0.0405148537233542	3.62079898541535	1.35106553436949	4	16	response to UV-C	0.25
GO:0030949	0.0405148537233542	3.62079898541535	1.35106553436949	4	16	positive regulation of vascular endothelial growth factor receptor signaling pathway	0.25
GO:0034116	0.0405148537233542	3.62079898541535	1.35106553436949	4	16	positive regulation of heterotypic cell-cell adhesion	0.25
GO:0035067	0.0405148537233542	3.62079898541535	1.35106553436949	4	16	negative regulation of histone acetylation	0.25
GO:0051014	0.0405148537233542	3.62079898541535	1.35106553436949	4	16	actin filament severing	0.25
GO:0051770	0.0405148537233542	3.62079898541535	1.35106553436949	4	16	positive regulation of nitric-oxide synthase biosynthetic process	0.25
GO:0061684	0.0405148537233542	3.62079898541535	1.35106553436949	4	16	chaperone-mediated autophagy	0.25
GO:0070230	0.0405148537233542	3.62079898541535	1.35106553436949	4	16	positive regulation of lymphocyte apoptotic process	0.25
GO:0071639	0.0405148537233542	3.62079898541535	1.35106553436949	4	16	positive regulation of monocyte chemotactic protein-1 production	0.25
GO:0071732	0.0405148537233542	3.62079898541535	1.35106553436949	4	16	cellular response to nitric oxide	0.25
GO:0099010	0.0405148537233542	3.62079898541535	1.35106553436949	4	16	modification of postsynaptic structure	0.25
GO:2000273	0.00103607184705197	3.52544023979018	3.7998718154142	11	45	positive regulation of signaling receptor activity	0.244444444444444
GO:0045730	0.00302381739075017	3.49931842966194	3.12433904822945	9	37	respiratory burst	0.243243243243243
GO:0030947	0.00520111486571446	3.48216147488875	2.78657266463708	8	33	regulation of vascular endothelial growth factor receptor signaling pathway	0.242424242424242
GO:0071353	0.00520111486571446	3.48216147488875	2.78657266463708	8	33	cellular response to interleukin-4	0.242424242424242
GO:1903715	0.00520111486571446	3.48216147488875	2.78657266463708	8	33	regulation of aerobic respiration	0.242424242424242
GO:0032757	0.000153396368135529	3.48394065378658	5.23537894568178	15	62	positive regulation of interleukin-8 production	0.241935483870968
GO:0002862	0.00900109491937073	3.46078318124061	2.4488062810447	7	29	negative regulation of inflammatory response to antigenic stimulus	0.241379310344828
GO:2000406	0.00900109491937073	3.46078318124061	2.4488062810447	7	29	positive regulation of T cell migration	0.241379310344828
GO:0032469	0.0157014841235896	3.43318295739348	2.11103989745233	6	25	endoplasmic reticulum calcium ion homeostasis	0.24
GO:0042730	0.0157014841235896	3.43318295739348	2.11103989745233	6	25	fibrinolysis	0.24
GO:0046039	0.0157014841235896	3.43318295739348	2.11103989745233	6	25	GTP metabolic process	0.24
GO:0046835	0.0157014841235896	3.43318295739348	2.11103989745233	6	25	carbohydrate phosphorylation	0.24
GO:0086064	0.0157014841235896	3.43318295739348	2.11103989745233	6	25	cell communication by electrical coupling involved in cardiac conduction	0.24
GO:1900078	0.0157014841235896	3.43318295739348	2.11103989745233	6	25	positive regulation of cellular response to insulin stimulus	0.24
GO:1903901	0.0157014841235896	3.43318295739348	2.11103989745233	6	25	negative regulation of viral life cycle	0.24
GO:0061028	0.00125930030117768	3.42451319381256	3.88431341131229	11	46	establishment of endothelial barrier	0.239130434782609
GO:0046596	0.00214587720077922	3.40348504137492	3.54654702771992	10	42	regulation of viral entry into host cell	0.238095238095238
GO:0071312	0.00214587720077922	3.40348504137492	3.54654702771992	10	42	cellular response to alkaloid	0.238095238095238
GO:0022010	0.0276832607369775	3.3958597715736	1.77327351385996	5	21	central nervous system myelination	0.238095238095238
GO:0030449	0.0276832607369775	3.3958597715736	1.77327351385996	5	21	regulation of complement activation	0.238095238095238
GO:0032291	0.0276832607369775	3.3958597715736	1.77327351385996	5	21	axon ensheathment in central nervous system	0.238095238095238
GO:0033630	0.0276832607369775	3.3958597715736	1.77327351385996	5	21	positive regulation of cell adhesion mediated by integrin	0.238095238095238
GO:0035020	0.0276832607369775	3.3958597715736	1.77327351385996	5	21	regulation of Rac protein signal transduction	0.238095238095238
GO:0070584	0.0276832607369775	3.3958597715736	1.77327351385996	5	21	mitochondrion morphogenesis	0.238095238095238
GO:1903429	0.0276832607369775	3.3958597715736	1.77327351385996	5	21	regulation of cell maturation	0.238095238095238
GO:0046676	0.0036705129993445	3.37845485654119	3.20878064412754	9	38	negative regulation of insulin secretion	0.236842105263158
GO:0033627	7.92415739181668e-05	3.37687747035573	6.07979490466271	17	72	cell adhesion mediated by integrin	0.236111111111111
GO:0043903	7.92415739181668e-05	3.37687747035573	6.07979490466271	17	72	regulation of biological process involved in symbiotic interaction	0.236111111111111
GO:0007095	0.0063077485721108	3.34803657880581	2.87101426053517	8	34	mitotic G2 DNA damage checkpoint signaling	0.235294117647059
GO:0032212	0.0063077485721108	3.34803657880581	2.87101426053517	8	34	positive regulation of telomere maintenance via telomerase	0.235294117647059
GO:0043516	0.0063077485721108	3.34803657880581	2.87101426053517	8	34	regulation of DNA damage response, signal transduction by p53 class mediator	0.235294117647059
GO:0051973	0.0063077485721108	3.34803657880581	2.87101426053517	8	34	positive regulation of telomerase activity	0.235294117647059
GO:0000076	0.049548477339452	3.3420808741037	1.43550713026759	4	17	DNA replication checkpoint signaling	0.235294117647059
GO:0007158	0.049548477339452	3.3420808741037	1.43550713026759	4	17	neuron cell-cell adhesion	0.235294117647059
GO:0008340	0.049548477339452	3.3420808741037	1.43550713026759	4	17	determination of adult lifespan	0.235294117647059
GO:0021924	0.049548477339452	3.3420808741037	1.43550713026759	4	17	cell proliferation in external granule layer	0.235294117647059
GO:0021930	0.049548477339452	3.3420808741037	1.43550713026759	4	17	cerebellar granule cell precursor proliferation	0.235294117647059
GO:0035269	0.049548477339452	3.3420808741037	1.43550713026759	4	17	protein O-linked mannosylation	0.235294117647059
GO:0035518	0.049548477339452	3.3420808741037	1.43550713026759	4	17	histone H2A monoubiquitination	0.235294117647059
GO:0035855	0.049548477339452	3.3420808741037	1.43550713026759	4	17	megakaryocyte development	0.235294117647059
GO:0046827	0.049548477339452	3.3420808741037	1.43550713026759	4	17	positive regulation of protein export from nucleus	0.235294117647059
GO:0060977	0.049548477339452	3.3420808741037	1.43550713026759	4	17	coronary vasculature morphogenesis	0.235294117647059
GO:0061450	0.049548477339452	3.3420808741037	1.43550713026759	4	17	trophoblast cell migration	0.235294117647059
GO:0090083	0.049548477339452	3.3420808741037	1.43550713026759	4	17	regulation of inclusion body assembly	0.235294117647059
GO:0090399	0.049548477339452	3.3420808741037	1.43550713026759	4	17	replicative senescence	0.235294117647059
GO:1903541	0.049548477339452	3.3420808741037	1.43550713026759	4	17	regulation of exosomal secretion	0.235294117647059
GO:1904355	0.049548477339452	3.3420808741037	1.43550713026759	4	17	positive regulation of telomere capping	0.235294117647059
GO:0001774	0.00152055951717345	3.3291932059448	3.96875500721038	11	47	microglial cell activation	0.234042553191489
GO:0007176	0.0109034539754531	3.31012098779073	2.5332478769428	7	30	regulation of epidermal growth factor-activated receptor activity	0.233333333333333
GO:0034508	0.0109034539754531	3.31012098779073	2.5332478769428	7	30	centromere complex assembly	0.233333333333333
GO:0046825	0.0109034539754531	3.31012098779073	2.5332478769428	7	30	regulation of protein export from nucleus	0.233333333333333
GO:1902751	0.0109034539754531	3.31012098779073	2.5332478769428	7	30	positive regulation of cell cycle G2/M phase transition	0.233333333333333
GO:0032728	0.00442074451142236	3.26564885496183	3.29322224002564	9	39	positive regulation of interferon-beta production	0.230769230769231
GO:0001556	0.01899000654744	3.26133333333333	2.19548149335042	6	26	oocyte maturation	0.230769230769231
GO:0001573	0.01899000654744	3.26133333333333	2.19548149335042	6	26	ganglioside metabolic process	0.230769230769231
GO:0051560	0.01899000654744	3.26133333333333	2.19548149335042	6	26	mitochondrial calcium ion homeostasis	0.230769230769231
GO:1900017	0.01899000654744	3.26133333333333	2.19548149335042	6	26	positive regulation of cytokine production involved in inflammatory response	0.230769230769231
GO:1902186	0.01899000654744	3.26133333333333	2.19548149335042	6	26	regulation of viral release from host cell	0.230769230769231
GO:0033628	0.00182453065949039	3.23902564985368	4.05319660310848	11	48	regulation of cell adhesion mediated by integrin	0.229166666666667
GO:2001238	0.00182453065949039	3.23902564985368	4.05319660310848	11	48	positive regulation of extrinsic apoptotic signaling pathway	0.229166666666667
GO:2000403	0.007583997119256	3.2238468602105	2.95545585643326	8	35	positive regulation of lymphocyte migration	0.228571428571429
GO:0048525	2.08062945263379e-05	3.23664680390032	7.76862682262458	21	92	negative regulation of viral process	0.228260869565217
GO:0006359	0.0334069131380295	3.19591669154972	1.85771510975805	5	22	regulation of transcription by RNA polymerase III	0.227272727272727
GO:0007413	0.0334069131380295	3.19591669154972	1.85771510975805	5	22	axonal fasciculation	0.227272727272727
GO:0032727	0.0334069131380295	3.19591669154972	1.85771510975805	5	22	positive regulation of interferon-alpha production	0.227272727272727
GO:0035268	0.0334069131380295	3.19591669154972	1.85771510975805	5	22	protein mannosylation	0.227272727272727
GO:0071359	0.0334069131380295	3.19591669154972	1.85771510975805	5	22	cellular response to dsRNA	0.227272727272727
GO:0099563	0.0334069131380295	3.19591669154972	1.85771510975805	5	22	modification of synaptic structure	0.227272727272727
GO:0106030	0.0334069131380295	3.19591669154972	1.85771510975805	5	22	neuron projection fasciculation	0.227272727272727
GO:1901032	0.0334069131380295	3.19591669154972	1.85771510975805	5	22	negative regulation of response to reactive oxygen species	0.227272727272727
GO:0032731	0.000539352491619457	3.18171665603063	5.23537894568178	14	62	positive regulation of interleukin-1 beta production	0.225806451612903
GO:0002230	0.0130811732206971	3.17201397712834	2.61768947284089	7	31	positive regulation of defense response to virus by host	0.225806451612903
GO:0030212	0.0130811732206971	3.17201397712834	2.61768947284089	7	31	hyaluronan metabolic process	0.225806451612903
GO:0051443	0.0130811732206971	3.17201397712834	2.61768947284089	7	31	positive regulation of ubiquitin-protein transferase activity	0.225806451612903
GO:0060045	0.0130811732206971	3.17201397712834	2.61768947284089	7	31	positive regulation of cardiac muscle cell proliferation	0.225806451612903
GO:1902042	0.0130811732206971	3.17201397712834	2.61768947284089	7	31	negative regulation of extrinsic apoptotic signaling pathway via death domain receptors	0.225806451612903
GO:0006778	0.00217621454124605	3.15360375460945	4.13763819900657	11	49	porphyrin-containing compound metabolic process	0.224489795918367
GO:0006953	0.00217621454124605	3.15360375460945	4.13763819900657	11	49	acute-phase response	0.224489795918367
GO:0052372	0.00217621454124605	3.15360375460945	4.13763819900657	11	49	modulation by symbiont of entry into host	0.224489795918367
GO:1902041	0.00217621454124605	3.15360375460945	4.13763819900657	11	49	regulation of extrinsic apoptotic signaling pathway via death domain receptors	0.224489795918367
GO:0045069	6.87886104383979e-05	3.14713071819346	7.17753565133793	19	85	regulation of viral genome replication	0.223529411764706
GO:0071479	0.000270254804502596	3.11930625285258	6.07979490466271	16	72	cellular response to ionizing radiation	0.222222222222222
GO:0060338	0.00904502785317549	3.10852783580056	3.03989745233136	8	36	regulation of type I interferon-mediated signaling pathway	0.222222222222222
GO:0070670	0.00904502785317549	3.10852783580056	3.03989745233136	8	36	response to interleukin-4	0.222222222222222
GO:0010971	0.0227185346904074	3.10585034013605	2.27992308924852	6	27	positive regulation of G2/M transition of mitotic cell cycle	0.222222222222222
GO:0098901	0.0227185346904074	3.10585034013605	2.27992308924852	6	27	regulation of cardiac muscle cell action potential	0.222222222222222
GO:1903205	0.0227185346904074	3.10585034013605	2.27992308924852	6	27	regulation of hydrogen peroxide-induced cell death	0.222222222222222
GO:1903421	0.0227185346904074	3.10585034013605	2.27992308924852	6	27	regulation of synaptic vesicle recycling	0.222222222222222
GO:0033013	0.0010753389742859	3.08129991126886	4.9820541579875	13	59	tetrapyrrole metabolic process	0.220338983050847
GO:0042542	4.28993436326085e-07	3.08572593523835	12.3284730011216	32	146	response to hydrogen peroxide	0.219178082191781
GO:0010039	0.0155541544730887	3.04495552731893	2.70213106873898	7	32	response to iron ion	0.21875
GO:0019934	0.0155541544730887	3.04495552731893	2.70213106873898	7	32	cGMP-mediated signaling	0.21875
GO:0061098	0.00180802956423479	3.04130908444128	4.64428777439513	12	55	positive regulation of protein tyrosine kinase activity	0.218181818181818
GO:2000107	0.0043653081796965	3.02461277318056	3.88431341131229	10	46	negative regulation of leukocyte apoptotic process	0.217391304347826
GO:0002052	0.0398129462143842	3.01818950930626	1.94215670565614	5	23	positive regulation of neuroblast proliferation	0.217391304347826
GO:0003081	0.0398129462143842	3.01818950930626	1.94215670565614	5	23	regulation of systemic arterial blood pressure by renin-angiotensin	0.217391304347826
GO:0006929	0.0398129462143842	3.01818950930626	1.94215670565614	5	23	substrate-dependent cell migration	0.217391304347826
GO:0042026	0.0398129462143842	3.01818950930626	1.94215670565614	5	23	protein refolding	0.217391304347826
GO:0045932	0.0398129462143842	3.01818950930626	1.94215670565614	5	23	negative regulation of muscle contraction	0.217391304347826
GO:0050765	0.0398129462143842	3.01818950930626	1.94215670565614	5	23	negative regulation of phagocytosis	0.217391304347826
GO:0051383	0.0398129462143842	3.01818950930626	1.94215670565614	5	23	kinetochore organization	0.217391304347826
GO:0051590	0.0398129462143842	3.01818950930626	1.94215670565614	5	23	positive regulation of neurotransmitter transport	0.217391304347826
GO:0060307	0.0398129462143842	3.01818950930626	1.94215670565614	5	23	regulation of ventricular cardiac muscle cell membrane repolarization	0.217391304347826
GO:2001169	0.0398129462143842	3.01818950930626	1.94215670565614	5	23	regulation of ATP biosynthetic process	0.217391304347826
GO:0031663	0.0012684034028223	3.01556393834129	5.0664957538856	13	60	lipopolysaccharide-mediated signaling pathway	0.216666666666667
GO:0033260	0.010706051429017	3.00116184755683	3.12433904822945	8	37	nuclear DNA replication	0.216216216216216
GO:1904358	0.010706051429017	3.00116184755683	3.12433904822945	8	37	positive regulation of telomere maintenance via telomere lengthening	0.216216216216216
GO:0071677	0.000890974541700297	2.99403130748151	5.48870373337606	14	65	positive regulation of mononuclear cell migration	0.215384615384615
GO:0070301	5.65515120084826e-05	2.98339160839161	8.27527639801314	21	98	cellular response to hydrogen peroxide	0.214285714285714
GO:0016601	0.00740085950809928	2.96825121443442	3.54654702771992	9	42	Rac protein signal transduction	0.214285714285714
GO:0032467	0.00740085950809928	2.96825121443442	3.54654702771992	9	42	positive regulation of cytokinesis	0.214285714285714
GO:0032689	0.00740085950809928	2.96825121443442	3.54654702771992	9	42	negative regulation of interferon-gamma production	0.214285714285714
GO:0032607	0.0269089680331378	2.96450216450216	2.36436468514661	6	28	interferon-alpha production	0.214285714285714
GO:0032647	0.0269089680331378	2.96450216450216	2.36436468514661	6	28	regulation of interferon-alpha production	0.214285714285714
GO:0045671	0.0269089680331378	2.96450216450216	2.36436468514661	6	28	negative regulation of osteoclast differentiation	0.214285714285714
GO:0090344	0.0269089680331378	2.96450216450216	2.36436468514661	6	28	negative regulation of cell aging	0.214285714285714
GO:1902624	0.0269089680331378	2.96450216450216	2.36436468514661	6	28	positive regulation of neutrophil migration	0.214285714285714
GO:0008088	0.00044107920232502	2.96017761412249	6.33311969235699	16	75	axo-dendritic transport	0.213333333333333
GO:0034113	0.00148945819076033	2.95256696428571	5.15093734978369	13	61	heterotypic cell-cell adhesion	0.213114754098361
GO:0090342	0.00148945819076033	2.95256696428571	5.15093734978369	13	61	regulation of cell aging	0.213114754098361
GO:0046677	0.00513415916956759	2.94269444492233	3.96875500721038	10	47	response to antibiotic	0.212765957446809
GO:0051972	0.00513415916956759	2.94269444492233	3.96875500721038	10	47	regulation of telomerase activity	0.212765957446809
GO:0097300	0.00513415916956759	2.94269444492233	3.96875500721038	10	47	programmed necrotic cell death	0.212765957446809
GO:0036336	0.0183415112904587	2.92767080441795	2.78657266463708	7	33	dendritic cell migration	0.212121212121212
GO:0046685	0.0183415112904587	2.92767080441795	2.78657266463708	7	33	response to arsenic-containing substance	0.212121212121212
GO:1902692	0.0183415112904587	2.92767080441795	2.78657266463708	7	33	regulation of neuroblast proliferation	0.212121212121212
GO:0007044	0.000109209033515814	2.9155669442665	8.02195161031886	20	95	cell-substrate junction assembly	0.210526315789474
GO:0070265	0.00174152704971608	2.89214129529363	5.23537894568178	13	62	necrotic cell death	0.209677419354839
GO:0090278	0.00867482996355332	2.88078132016165	3.63098862361801	9	43	negative regulation of peptide hormone secretion	0.209302325581395
GO:1904706	0.00867482996355332	2.88078132016165	3.63098862361801	9	43	negative regulation of vascular associated smooth muscle cell proliferation	0.209302325581395
GO:0090199	0.00600511404064053	2.86508760762505	4.05319660310848	10	48	regulation of release of cytochrome c from mitochondria	0.208333333333333
GO:0001783	0.046914069037881	2.85917045150948	2.02659830155424	5	24	B cell apoptotic process	0.208333333333333
GO:0021801	0.046914069037881	2.85917045150948	2.02659830155424	5	24	cerebral cortex radial glia-guided migration	0.208333333333333
GO:0022030	0.046914069037881	2.85917045150948	2.02659830155424	5	24	telencephalon glial cell migration	0.208333333333333
GO:0032528	0.046914069037881	2.85917045150948	2.02659830155424	5	24	microvillus organization	0.208333333333333
GO:0033032	0.046914069037881	2.85917045150948	2.02659830155424	5	24	regulation of myeloid cell apoptotic process	0.208333333333333
GO:0036003	0.046914069037881	2.85917045150948	2.02659830155424	5	24	positive regulation of transcription from RNA polymerase II promoter in response to stress	0.208333333333333
GO:0070841	0.046914069037881	2.85917045150948	2.02659830155424	5	24	inclusion body assembly	0.208333333333333
GO:0090023	0.046914069037881	2.85917045150948	2.02659830155424	5	24	positive regulation of neutrophil chemotaxis	0.208333333333333
GO:0098743	0.046914069037881	2.85917045150948	2.02659830155424	5	24	cell aggregation	0.208333333333333
GO:0008347	0.00417081830579685	2.85259326660601	4.47540458259894	11	53	glial cell migration	0.207547169811321
GO:1903202	0.00417081830579685	2.85259326660601	4.47540458259894	11	53	negative regulation of oxidative stress-induced cell death	0.207547169811321
GO:0002687	6.86392728467096e-06	2.87041661902498	11.3996154462426	28	135	positive regulation of leukocyte migration	0.207407407407407
GO:0043525	0.00290482835246661	2.84246404522404	4.89761256208941	12	58	positive regulation of neuron apoptotic process	0.206896551724138
GO:0006688	0.0315805871062945	2.83544513457557	2.4488062810447	6	29	glycosphingolipid biosynthetic process	0.206896551724138
GO:0051873	0.0315805871062945	2.83544513457557	2.4488062810447	6	29	killing by host of symbiont cells	0.206896551724138
GO:0051883	0.0315805871062945	2.83544513457557	2.4488062810447	6	29	killing of cells in other organism involved in symbiotic interaction	0.206896551724138
GO:1902175	0.0315805871062945	2.83544513457557	2.4488062810447	6	29	regulation of oxidative stress-induced intrinsic apoptotic signaling pathway	0.206896551724138
GO:0007431	0.0214613756989193	2.81907383876888	2.87101426053517	7	34	salivary gland development	0.205882352941176
GO:0086004	0.0214613756989193	2.81907383876888	2.87101426053517	7	34	regulation of cardiac muscle cell contraction	0.205882352941176
GO:0035773	0.000993847093375428	2.82137666798785	6.16423650056081	15	73	insulin secretion involved in cellular response to glucose stimulus	0.205479452054795
GO:0002792	0.0101082786049299	2.79830970556161	3.7154302195161	9	44	negative regulation of peptide secretion	0.204545454545455
GO:0031295	0.0101082786049299	2.79830970556161	3.7154302195161	9	44	T cell costimulation	0.204545454545455
GO:0002762	0.00698688314304937	2.79146060813788	4.13763819900657	10	49	negative regulation of myeloid leukocyte differentiation	0.204081632653061
GO:0031146	0.00698688314304937	2.79146060813788	4.13763819900657	10	49	SCF-dependent proteasomal ubiquitin-dependent protein catabolic process	0.204081632653061
GO:0032760	0.000120620830138128	2.80065666041276	8.6974843775036	21	103	positive regulation of tumor necrosis factor production	0.203883495145631
GO:0001836	0.00337193202349148	2.78182335950531	4.9820541579875	12	59	release of cytochrome c from mitochondria	0.203389830508475
GO:0048010	0.00337193202349148	2.78182335950531	4.9820541579875	12	59	vascular endothelial growth factor receptor signaling pathway	0.203389830508475
GO:0001885	0.0023517773988644	2.77839885954382	5.40426213747797	13	64	endothelial cell development	0.203125
GO:0046888	0.0023517773988644	2.77839885954382	5.40426213747797	13	64	negative regulation of hormone secretion	0.203125
GO:0061178	0.0023517773988644	2.77839885954382	5.40426213747797	13	64	regulation of insulin secretion involved in cellular response to glucose stimulus	0.203125
GO:0098930	0.0023517773988644	2.77839885954382	5.40426213747797	13	64	axonal transport	0.203125
GO:0046718	8.67811253991373e-06	2.76660129986553	12.1595898093254	29	144	viral entry into host cell	0.201388888888889
GO:0030218	5.64370826596582e-05	2.73699421965318	10.1329915077712	24	120	erythrocyte differentiation	0.2
GO:0072384	0.000653709386117095	2.7292199488491	7.17753565133793	17	85	organelle transport along microtubule	0.2
GO:0098900	0.00560627300974	2.72261146496815	4.64428777439513	11	55	regulation of action potential	0.2
GO:0042551	0.0117128259872447	2.72041984732824	3.7998718154142	9	45	neuron maturation	0.2
GO:0048599	0.0117128259872447	2.72041984732824	3.7998718154142	9	45	oocyte development	0.2
GO:0006739	0.0249307203438351	2.71823379923761	2.95545585643326	7	35	NADP metabolic process	0.2
GO:0007020	0.0249307203438351	2.71823379923761	2.95545585643326	7	35	microtubule nucleation	0.2
GO:0032435	0.0249307203438351	2.71823379923761	2.95545585643326	7	35	negative regulation of proteasomal ubiquitin-dependent protein catabolic process	0.2
GO:0036296	0.0367498703890048	2.71714285714286	2.5332478769428	6	30	response to increased oxygen levels	0.2
GO:0048799	0.0367498703890048	2.71714285714286	2.5332478769428	6	30	animal organ maturation	0.2
GO:0051125	0.0367498703890048	2.71714285714286	2.5332478769428	6	30	regulation of actin nucleation	0.2
GO:0070229	0.0367498703890048	2.71714285714286	2.5332478769428	6	30	negative regulation of lymphocyte apoptotic process	0.2
GO:0070498	0.0367498703890048	2.71714285714286	2.5332478769428	6	30	interleukin-1-mediated signaling pathway	0.2
GO:0044409	8.1208204659919e-06	2.72087855875442	12.7506809806121	30	151	entry into host	0.198675496688742
GO:0150115	0.000261733140094119	2.69864996322395	8.52860118570742	20	101	cell-substrate junction organization	0.198019801980198
GO:0000422	0.00107111662028454	2.68598672892603	6.83976926774555	16	81	autophagy of mitochondrion	0.197530864197531
GO:0061726	0.00107111662028454	2.68598672892603	6.83976926774555	16	81	mitochondrion disassembly	0.197530864197531
GO:0007569	3.71495351832768e-05	2.68722926651702	11.1462906585483	26	132	cell aging	0.196969696969697
GO:1903557	0.000211547331854146	2.66976744186047	9.03525076109598	21	107	positive regulation of tumor necrosis factor superfamily cytokine production	0.196261682242991
GO:0071622	0.00931863962395896	2.65498129201534	4.30652139080276	10	51	regulation of granulocyte chemotaxis	0.196078431372549
GO:1903900	1.50620015619775e-05	2.67297821190332	12.4973561929178	29	148	regulation of viral life cycle	0.195945945945946
GO:0007019	0.0135000600485403	2.64674025170208	3.88431341131229	9	46	microtubule depolymerization	0.195652173913043
GO:0031294	0.0135000600485403	2.64674025170208	3.88431341131229	9	46	lymphocyte costimulation	0.195652173913043
GO:0034198	0.0135000600485403	2.64674025170208	3.88431341131229	9	46	cellular response to amino acid starvation	0.195652173913043
GO:0043462	0.0135000600485403	2.64674025170208	3.88431341131229	9	46	regulation of ATPase activity	0.195652173913043
GO:0055010	0.0135000600485403	2.64674025170208	3.88431341131229	9	46	ventricular cardiac muscle tissue morphogenesis	0.195652173913043
GO:0048041	0.000862174599804204	2.65093167701863	7.34641884313411	17	87	focal adhesion assembly	0.195402298850575
GO:1903578	0.000862174599804204	2.65093167701863	7.34641884313411	17	87	regulation of ATP metabolic process	0.195402298850575
GO:0044786	0.0196487242291881	2.6367681904872	3.46210543182182	8	41	cell cycle DNA replication	0.195121951219512
GO:1902622	0.0196487242291881	2.6367681904872	3.46210543182182	8	41	regulation of neutrophil migration	0.195121951219512
GO:1905521	0.0196487242291881	2.6367681904872	3.46210543182182	8	41	regulation of macrophage migration	0.195121951219512
GO:0010821	2.43228195225928e-05	2.64631303150743	12.1595898093254	28	144	regulation of mitochondrion organization	0.194444444444444
GO:0050709	0.00250481038678022	2.63160442752459	6.07979490466271	14	72	negative regulation of protein secretion	0.194444444444444
GO:0038179	0.0287651978415805	2.62434824519125	3.03989745233136	7	36	neurotrophin signaling pathway	0.194444444444444
GO:0044060	0.0287651978415805	2.62434824519125	3.03989745233136	7	36	regulation of endocrine process	0.194444444444444
GO:0045742	0.0287651978415805	2.62434824519125	3.03989745233136	7	36	positive regulation of epidermal growth factor receptor signaling pathway	0.194444444444444
GO:0045746	0.0287651978415805	2.62434824519125	3.03989745233136	7	36	negative regulation of Notch signaling pathway	0.194444444444444
GO:1902229	0.0287651978415805	2.62434824519125	3.03989745233136	7	36	regulation of intrinsic apoptotic signaling pathway in response to DNA damage	0.194444444444444
GO:0052126	3.50752845994664e-06	2.64998830956278	14.7772792821663	34	175	movement in host environment	0.194285714285714
GO:0006513	0.00358649893067801	2.62358276643991	5.65758692517225	13	67	protein monoubiquitination	0.194029850746269
GO:0036474	0.0424303577093988	2.60830476190476	2.61768947284089	6	31	cell death in response to hydrogen peroxide	0.193548387096774
GO:0048384	0.0424303577093988	2.60830476190476	2.61768947284089	6	31	retinoic acid receptor signaling pathway	0.193548387096774
GO:0031398	0.000137654945524952	2.62126925545571	10.0485499118731	23	119	positive regulation of protein ubiquitination	0.19327731092437
GO:0006611	0.00740481771030669	2.60393242869011	4.81317096619132	11	57	protein export from nucleus	0.192982456140351
GO:0030219	0.00740481771030669	2.60393242869011	4.81317096619132	11	57	megakaryocyte differentiation	0.192982456140351
GO:0060760	0.00740481771030669	2.60393242869011	4.81317096619132	11	57	positive regulation of response to cytokine stimulus	0.192982456140351
GO:0046785	0.00140473419755127	2.60550283725144	7.00865245954174	16	83	microtubule polymerization	0.192771084337349
GO:0006956	7.83719545646446e-05	2.60695923613661	10.9774074667521	25	130	complement activation	0.192307692307692
GO:0010718	0.0106868437525787	2.59161589524416	4.39096298670085	10	52	positive regulation of epithelial to mesenchymal transition	0.192307692307692
GO:0032206	0.0106868437525787	2.59161589524416	4.39096298670085	10	52	positive regulation of telomere maintenance	0.192307692307692
GO:0032732	0.00286334404962204	2.586849534358	6.16423650056081	14	73	positive regulation of interleukin-1 production	0.191780821917808
GO:0051865	0.00286334404962204	2.586849534358	6.16423650056081	14	73	protein autoubiquitination	0.191780821917808
GO:0045646	0.015481457625139	2.57693852952993	3.96875500721038	9	47	regulation of erythrocyte differentiation	0.191489361702128
GO:0072583	0.015481457625139	2.57693852952993	3.96875500721038	9	47	clathrin-dependent endocytosis	0.191489361702128
GO:0009206	0.0040989541358481	2.57573051948052	5.74202852107034	13	68	purine ribonucleoside triphosphate biosynthetic process	0.191176470588235
GO:0070059	0.00588052348169708	2.56304127769655	5.31982054157988	12	63	intrinsic apoptotic signaling pathway in response to endoplasmic reticulum stress	0.19047619047619
GO:0010939	0.0225305747517972	2.55906660184735	3.54654702771992	8	42	regulation of necrotic cell death	0.19047619047619
GO:0030574	0.0225305747517972	2.55906660184735	3.54654702771992	8	42	collagen catabolic process	0.19047619047619
GO:0030890	0.0225305747517972	2.55906660184735	3.54654702771992	8	42	positive regulation of B cell proliferation	0.19047619047619
GO:0048489	0.0225305747517972	2.55906660184735	3.54654702771992	8	42	synaptic vesicle transport	0.19047619047619
GO:1902895	0.0225305747517972	2.55906660184735	3.54654702771992	8	42	positive regulation of pri-miRNA transcription by RNA polymerase II	0.19047619047619
GO:2000404	0.0225305747517972	2.55906660184735	3.54654702771992	8	42	regulation of T cell migration	0.19047619047619
GO:0032481	0.00845800670895014	2.54838053936848	4.89761256208941	11	58	positive regulation of type I interferon production	0.189655172413793
GO:0000302	5.54409241267e-07	2.57166991552956	18.7460342893767	42	222	response to reactive oxygen species	0.189189189189189
GO:0002181	4.08382463687743e-05	2.55750160978751	12.4973561929178	28	148	cytoplasmic translation	0.189189189189189
GO:1903201	0.00326290850989893	2.54358647096362	6.2486780964589	14	74	regulation of oxidative stress-induced cell death	0.189189189189189
GO:0000462	0.0329789986711786	2.53672172808132	3.12433904822945	7	37	maturation of SSU-rRNA from tricistronic rRNA transcript (SSU-rRNA, 5.8S rRNA, LSU-rRNA)	0.189189189189189
GO:0050792	1.6499363009791e-05	2.55774436090226	13.8484217272873	31	164	regulation of viral process	0.189024390243902
GO:2000058	1.6499363009791e-05	2.55774436090226	13.8484217272873	31	164	regulation of ubiquitin-dependent protein catabolic process	0.189024390243902
GO:0034109	0.00127976470668775	2.54154258487195	7.59974363082839	17	90	homotypic cell-cell adhesion	0.188888888888889
GO:0042116	0.000507435084017474	2.54100680839653	8.95080916519789	20	106	macrophage activation	0.188679245283019
GO:0032210	0.0122021985076442	2.53119772622978	4.47540458259894	10	53	regulation of telomere maintenance via telomerase	0.188679245283019
GO:2000772	0.0122021985076442	2.53119772622978	4.47540458259894	10	53	regulation of cellular senescence	0.188679245283019
GO:0009145	0.0046689180503199	2.52958728134111	5.82647011696843	13	69	purine nucleoside triphosphate biosynthetic process	0.188405797101449
GO:0044774	0.00182176470158689	2.52968467842756	7.17753565133793	16	85	mitotic DNA integrity checkpoint signaling	0.188235294117647
GO:0006940	0.00669484950081231	2.51360494190322	5.40426213747797	12	64	regulation of smooth muscle contraction	0.1875
GO:1903051	0.00669484950081231	2.51360494190322	5.40426213747797	12	64	negative regulation of proteolysis involved in cellular protein catabolic process	0.1875
GO:0030261	0.0176683061446387	2.51071638285379	4.05319660310848	9	48	chromosome condensation	0.1875
GO:0042908	0.0176683061446387	2.51071638285379	4.05319660310848	9	48	xenobiotic transport	0.1875
GO:0090311	0.0176683061446387	2.51071638285379	4.05319660310848	9	48	regulation of protein deacetylation	0.1875
GO:2000059	0.0176683061446387	2.51071638285379	4.05319660310848	9	48	negative regulation of ubiquitin-dependent protein catabolic process	0.1875
GO:0007435	0.0486325584562395	2.50783882783883	2.70213106873898	6	32	salivary gland morphogenesis	0.1875
GO:0010644	0.0486325584562395	2.50783882783883	2.70213106873898	6	32	cell communication by electrical coupling	0.1875
GO:0045684	0.0486325584562395	2.50783882783883	2.70213106873898	6	32	positive regulation of epidermis development	0.1875
GO:0045736	0.0486325584562395	2.50783882783883	2.70213106873898	6	32	negative regulation of cyclin-dependent protein serine/threonine kinase activity	0.1875
GO:0051642	0.0486325584562395	2.50783882783883	2.70213106873898	6	32	centrosome localization	0.1875
GO:0090022	0.0486325584562395	2.50783882783883	2.70213106873898	6	32	regulation of neutrophil chemotaxis	0.1875
GO:0090140	0.0486325584562395	2.50783882783883	2.70213106873898	6	32	regulation of mitochondrial fission	0.1875
GO:1901889	0.0486325584562395	2.50783882783883	2.70213106873898	6	32	negative regulation of cell junction assembly	0.1875
GO:1905476	0.0486325584562395	2.50783882783883	2.70213106873898	6	32	negative regulation of protein localization to membrane	0.1875
GO:0051701	2.4665073926508e-06	2.5339303599835	17.1416439673129	38	203	biological process involved in interaction with host	0.187192118226601
GO:0061041	0.000130237025430551	2.51070139855192	11.3151738503445	25	134	regulation of wound healing	0.186567164179104
GO:0043407	0.00962356549103437	2.49514331210191	4.9820541579875	11	59	negative regulation of MAP kinase activity	0.186440677966102
GO:0034101	0.000183958130948468	2.50107349298101	10.892965870854	24	129	erythrocyte homeostasis	0.186046511627907
GO:0002861	0.0256976021319672	2.48580510398692	3.63098862361801	8	43	regulation of inflammatory response to antigenic stimulus	0.186046511627907
GO:0042771	0.0256976021319672	2.48580510398692	3.63098862361801	8	43	intrinsic apoptotic signaling pathway in response to DNA damage by p53 class mediator	0.186046511627907
GO:0140353	0.0256976021319672	2.48580510398692	3.63098862361801	8	43	lipid export from cell	0.186046511627907
GO:0010508	0.000259939644579159	2.49077263310413	10.4707578913636	23	124	positive regulation of autophagy	0.185483870967742
GO:0034446	0.000651226461343952	2.48296546502825	9.11969235699407	20	108	substrate adhesion-dependent cell spreading	0.185185185185185
GO:0044773	0.00294344653206488	2.47823058167886	6.83976926774555	15	81	mitotic DNA damage checkpoint signaling	0.185185185185185
GO:0070228	0.0138739199137818	2.47352583762514	4.55984617849704	10	54	regulation of lymphocyte apoptotic process	0.185185185185185
GO:0031058	0.00164426973993405	2.47347826086957	7.76862682262458	17	92	positive regulation of histone modification	0.184782608695652
GO:0002262	4.74742486615624e-05	2.48372060244845	13.2573305560006	29	157	myeloid cell homeostasis	0.184713375796178
GO:0048524	0.00759549962631953	2.4660341282153	5.48870373337606	12	65	positive regulation of viral process	0.184615384615385
GO:0006858	0.0375847285300951	2.4547485346559	3.20878064412754	7	38	extracellular transport	0.184210526315789
GO:0032373	0.0375847285300951	2.4547485346559	3.20878064412754	7	38	positive regulation of sterol transport	0.184210526315789
GO:0032376	0.0375847285300951	2.4547485346559	3.20878064412754	7	38	positive regulation of cholesterol transport	0.184210526315789
GO:0048246	0.0375847285300951	2.4547485346559	3.20878064412754	7	38	macrophage chemotaxis	0.184210526315789
GO:0097242	0.0375847285300951	2.4547485346559	3.20878064412754	7	38	amyloid-beta clearance	0.184210526315789
GO:1901031	0.0375847285300951	2.4547485346559	3.20878064412754	7	38	regulation of response to reactive oxygen species	0.184210526315789
GO:1901186	0.0375847285300951	2.4547485346559	3.20878064412754	7	38	positive regulation of ERBB signaling pathway	0.184210526315789
GO:0009994	0.0200716263199963	2.44780534351145	4.13763819900657	9	49	oocyte differentiation	0.183673469387755
GO:0010862	0.0200716263199963	2.44780534351145	4.13763819900657	9	49	positive regulation of pathway-restricted SMAD protein phosphorylation	0.183673469387755
GO:0034332	0.0200716263199963	2.44780534351145	4.13763819900657	9	49	adherens junction organization	0.183673469387755
GO:0043457	0.0200716263199963	2.44780534351145	4.13763819900657	9	49	regulation of cellular respiration	0.183673469387755
GO:0060986	0.0200716263199963	2.44780534351145	4.13763819900657	9	49	endocrine hormone secretion	0.183673469387755
GO:1901799	0.0200716263199963	2.44780534351145	4.13763819900657	9	49	negative regulation of proteasomal protein catabolic process	0.183673469387755
GO:1990928	0.0200716263199963	2.44780534351145	4.13763819900657	9	49	response to amino acid starvation	0.183673469387755
GO:0031638	0.0109089382346289	2.44407903288704	5.0664957538856	11	60	zymogen activation	0.183333333333333
GO:0032722	0.00599947511709925	2.4420742434905	5.99535330876462	13	71	positive regulation of chemokine production	0.183098591549296
GO:0009205	0.00332741227112258	2.4410991021902	6.92421086364365	15	82	purine ribonucleoside triphosphate metabolic process	0.182926829268293
GO:0032755	0.00185704162538194	2.44078947368421	7.85306841852267	17	93	positive regulation of interleukin-6 production	0.182795698924731
GO:0051591	0.00185704162538194	2.44078947368421	7.85306841852267	17	93	response to cAMP	0.182795698924731
GO:0090398	0.00185704162538194	2.44078947368421	7.85306841852267	17	93	cellular senescence	0.182795698924731
GO:0071675	0.000586185766004671	2.44140752864157	9.71078352828073	21	115	regulation of mononuclear cell migration	0.182608695652174
GO:2001235	0.000330931033072666	2.44212146515946	10.6396410831598	23	126	positive regulation of apoptotic signaling pathway	0.182539682539683
GO:0010212	0.000106174146763577	2.44406330769967	12.4973561929178	27	148	response to ionizing radiation	0.182432432432432
GO:0042177	0.000467222669260128	2.42933504383152	10.2174331036693	22	121	negative regulation of protein catabolic process	0.181818181818182
GO:0009144	0.00263804644241232	2.42385516506922	7.43086043903221	16	88	purine nucleoside triphosphate metabolic process	0.181818181818182
GO:0030193	0.008588449378448	2.42022519651583	5.57314532927415	12	66	regulation of blood coagulation	0.181818181818182
GO:0051893	0.008588449378448	2.42022519651583	5.57314532927415	12	66	regulation of focal adhesion assembly	0.181818181818182
GO:0090109	0.008588449378448	2.42022519651583	5.57314532927415	12	66	regulation of cell-substrate junction assembly	0.181818181818182
GO:0003229	0.0157111747813466	2.41841714406959	4.64428777439513	10	55	ventricular cardiac muscle tissue development	0.181818181818182
GO:0042554	0.0291618962490866	2.41661368934096	3.7154302195161	8	44	superoxide anion generation	0.181818181818182
GO:0050999	0.0291618962490866	2.41661368934096	3.7154302195161	8	44	regulation of nitric-oxide synthase activity	0.181818181818182
GO:0062208	0.0291618962490866	2.41661368934096	3.7154302195161	8	44	positive regulation of pattern recognition receptor signaling pathway	0.181818181818182
GO:1903050	3.24636197534469e-06	2.43237332434632	18.6615926934786	40	221	regulation of proteolysis involved in cellular protein catabolic process	0.180995475113122
GO:0032091	0.00209245186631858	2.40894974590627	7.93751001442077	17	94	negative regulation of protein binding	0.180851063829787
GO:0071453	3.08071412559769e-05	2.42160236860266	14.9461624739625	32	177	cellular response to oxygen levels	0.180790960451977
GO:0050886	0.00375153243441037	2.40505972503944	7.00865245954174	15	83	endocrine process	0.180722891566265
GO:0030330	0.00676948598988141	2.40054263230716	6.07979490466271	13	72	DNA damage response, signal transduction by p53 class mediator	0.180555555555556
GO:0031109	0.000525414432923334	2.40490057729314	10.3018746995674	22	122	microtubule polymerization or depolymerization	0.180327868852459
GO:0050994	0.012321629204329	2.39505732484076	5.15093734978369	11	61	regulation of lipid catabolic process	0.180327868852459
GO:0007160	2.07778680841417e-06	2.42199156996622	19.6748918442557	42	233	cell-matrix adhesion	0.180257510729614
GO:0008089	0.0227020966234433	2.38796313535654	4.22207979490466	9	50	anterograde axonal transport	0.18
GO:0014910	0.00296971273628188	2.39051161976454	7.5153020349303	16	89	regulation of smooth muscle cell migration	0.179775280898876
GO:0007596	5.10837416880013e-06	2.41039653740218	18.3238263098862	39	217	blood coagulation	0.179723502304147
GO:0061045	0.0053414911603888	2.38405392469687	6.58644448005127	14	78	negative regulation of wound healing	0.179487179487179
GO:0016572	0.0425933056932691	2.37789866581957	3.29322224002564	7	39	histone phosphorylation	0.179487179487179
GO:1903115	0.0425933056932691	2.37789866581957	3.29322224002564	7	39	regulation of actin filament-based movement	0.179487179487179
GO:2000785	0.0425933056932691	2.37789866581957	3.29322224002564	7	39	regulation of autophagosome assembly	0.179487179487179
GO:0044403	1.57806393126117e-07	2.41550747179186	24.488062810447	52	290	biological process involved in symbiotic interaction	0.179310344827586
GO:0032434	0.000333229219585835	2.38668768610965	11.3151738503445	24	134	regulation of proteasomal ubiquitin-dependent protein catabolic process	0.17910447761194
GO:0036473	0.00235233335904832	2.37792642140468	8.02195161031886	17	95	cell death in response to oxidative stress	0.178947368421053
GO:0032608	0.0177230284252147	2.36570448066864	4.72872937029322	10	56	interferon-beta production	0.178571428571429
GO:0032648	0.0177230284252147	2.36570448066864	4.72872937029322	10	56	regulation of interferon-beta production	0.178571428571429
GO:0048008	0.0177230284252147	2.36570448066864	4.72872937029322	10	56	platelet-derived growth factor receptor signaling pathway	0.178571428571429
GO:0034644	0.00333510690484278	2.35806925135999	7.59974363082839	16	90	cellular response to UV	0.177777777777778
GO:1904705	0.00333510690484278	2.35806925135999	7.59974363082839	16	90	regulation of vascular associated smooth muscle cell proliferation	0.177777777777778
GO:0008631	0.0329346681975929	2.35116235116235	3.7998718154142	8	45	intrinsic apoptotic signaling pathway in response to oxidative stress	0.177777777777778
GO:0035272	0.0329346681975929	2.35116235116235	3.7998718154142	8	45	exocrine system development	0.177777777777778
GO:1904646	0.0329346681975929	2.35116235116235	3.7998718154142	8	45	cellular response to amyloid-beta	0.177777777777778
GO:0006275	0.00147850054591481	2.3573070655337	9.03525076109598	19	107	regulation of DNA replication	0.177570093457944
GO:0007229	0.00147850054591481	2.3573070655337	9.03525076109598	19	107	integrin-mediated signaling pathway	0.177570093457944
GO:0097237	0.000660963604614218	2.35746896577746	10.4707578913636	22	124	cellular response to toxic substance	0.17741935483871
GO:0032613	0.0138691679349161	2.34795803671787	5.23537894568178	11	62	interleukin-10 production	0.17741935483871
GO:0032653	0.0138691679349161	2.34795803671787	5.23537894568178	11	62	regulation of interleukin-10 production	0.17741935483871
GO:0048488	0.0138691679349161	2.34795803671787	5.23537894568178	11	62	synaptic vesicle endocytosis	0.17741935483871
GO:0140238	0.0138691679349161	2.34795803671787	5.23537894568178	11	62	presynaptic endocytosis	0.17741935483871
GO:0014068	0.00599993361851575	2.34723872171224	6.67088607594937	14	79	positive regulation of phosphatidylinositol 3-kinase signaling	0.177215189873418
GO:0061136	3.86895576908493e-05	2.3516057585825	15.7905784329434	33	187	regulation of proteasomal protein catabolic process	0.176470588235294
GO:1902749	0.00208909140428623	2.33863449410474	8.61304278160551	18	102	regulation of cell cycle G2/M phase transition	0.176470588235294
GO:0009142	0.00473250484404493	2.33607006020799	7.17753565133793	15	85	nucleoside triphosphate biosynthetic process	0.176470588235294
GO:1900046	0.0108756761399728	2.33351543294182	5.74202852107034	12	68	regulation of hemostasis	0.176470588235294
GO:0002685	1.40327625747963e-05	2.35052337596214	17.7327351385996	37	210	regulation of leukocyte migration	0.176190476190476
GO:0006958	0.00165510962014904	2.33068379634292	9.11969235699407	19	108	complement activation, classical pathway	0.175925925925926
GO:1990874	0.00373675222244042	2.32649201277955	7.68418522672649	16	91	vascular associated smooth muscle cell proliferation	0.175824175824176
GO:0007599	8.93400800943472e-06	2.34384767493781	18.7460342893767	39	222	hemostasis	0.175675675675676
GO:0050817	8.93400800943472e-06	2.34384767493781	18.7460342893767	39	222	coagulation	0.175675675675676
GO:0009201	0.00854348571144312	2.32156448645032	6.2486780964589	13	74	ribonucleoside triphosphate biosynthetic process	0.175675675675676
GO:1903008	0.00131206866044043	2.32366050131531	9.62634193238263	20	114	organelle disassembly	0.175438596491228
GO:0006754	0.0199183924071101	2.3152349093273	4.81317096619132	10	57	ATP biosynthetic process	0.175438596491228
GO:0014909	0.0029532983881497	2.31820652173913	8.19083480211505	17	97	smooth muscle cell migration	0.175257731958763
GO:0031111	0.0480138785626408	2.3057063647915	3.37766383592373	7	40	negative regulation of microtubule polymerization or depolymerization	175
GO:0045740	0.0480138785626408	2.3057063647915	3.37766383592373	7	40	positive regulation of DNA replication	175
GO:0045639	0.00233607876089934	2.31098566105905	8.6974843775036	18	103	positive regulation of myeloid cell differentiation	0.174757281553398
GO:0016239	0.0155590734923278	2.30267025967663	5.31982054157988	11	63	positive regulation of macroautophagy	0.174603174603175
GO:0048864	0.00529578109450451	2.30303275592251	7.26197724723602	15	86	stem cell development	0.174418604651163
GO:0042176	7.37730463570336e-09	2.34027898563328	33.0166639961545	68	391	regulation of protein catabolic process	0.173913043478261
GO:0036294	0.000186749031235636	2.30575795573932	13.595096939593	28	161	cellular response to decreased oxygen levels	0.173913043478261
GO:1903322	0.00052075368934017	2.30240340736234	11.6529402339369	24	138	positive regulation of protein modification by small protein conjugation or removal	0.173913043478261
GO:0050688	0.0121823620535839	2.29244238703834	5.82647011696843	12	69	regulation of defense response to virus	0.173913043478261
GO:0031648	0.0370261646500251	2.2891558202563	3.88431341131229	8	46	protein destabilization	0.173913043478261
GO:0044818	0.0370261646500251	2.2891558202563	3.88431341131229	8	46	mitotic G2/M transition checkpoint	0.173913043478261
GO:0090329	0.0370261646500251	2.2891558202563	3.88431341131229	8	46	regulation of DNA-dependent DNA replication	0.173913043478261
GO:1903034	0.000148610246412856	2.30238682205289	14.1017465149816	29	167	regulation of response to wounding	0.173652694610778
GO:0043393	4.2745590378559e-05	2.3036223036223	16.5505527960263	34	196	regulation of protein binding	0.173469387755102
GO:0036465	0.00955760910933743	2.28398617511521	6.33311969235699	13	75	synaptic vesicle recycling	0.173333333333333
GO:1903363	0.00955760910933743	2.28398617511521	6.33311969235699	13	75	negative regulation of cellular protein catabolic process	0.173333333333333
GO:0002218	0.0286850553504341	2.27662879460323	4.39096298670085	9	52	activation of innate immune response	0.173076923076923
GO:0048260	0.0286850553504341	2.27662879460323	4.39096298670085	9	52	positive regulation of receptor-mediated endocytosis	0.173076923076923
GO:2000378	0.0286850553504341	2.27662879460323	4.39096298670085	9	52	negative regulation of reactive oxygen species metabolic process	0.173076923076923
GO:0014032	0.0075113401552389	2.27690519959234	6.83976926774555	14	81	neural crest cell development	0.172839506172839
GO:2000106	0.0075113401552389	2.27690519959234	6.83976926774555	14	81	regulation of leukocyte apoptotic process	0.172839506172839
GO:0006939	0.0020622930823315	2.27919263834757	9.28857554879026	19	110	smooth muscle contraction	0.172727272727273
GO:1903362	3.97747223185075e-06	2.2970950364932	21.5326069540138	44	255	regulation of cellular protein catabolic process	0.172549019607843
GO:0001954	0.0223059727608934	2.26686823679185	4.89761256208941	10	58	positive regulation of cell-matrix adhesion	0.172413793103448
GO:0006826	0.0223059727608934	2.26686823679185	4.89761256208941	10	58	iron ion transport	0.172413793103448
GO:0035904	0.0223059727608934	2.26686823679185	4.89761256208941	10	58	aorta development	0.172413793103448
GO:2000736	0.0223059727608934	2.26686823679185	4.89761256208941	10	58	regulation of stem cell differentiation	0.172413793103448
GO:2001244	0.0223059727608934	2.26686823679185	4.89761256208941	10	58	positive regulation of intrinsic apoptotic signaling pathway	0.172413793103448
GO:2001236	0.000365967955146006	2.27622893890675	12.7506809806121	26	151	regulation of extrinsic apoptotic signaling pathway	0.172185430463576
GO:0001952	0.00102514406849822	2.26797535914411	10.8085242749559	22	128	regulation of cell-matrix adhesion	0.171875
GO:0045670	0.0173988180943404	2.25909145535392	5.40426213747797	11	64	regulation of osteoclast differentiation	0.171875
GO:0060415	0.0136061172337147	2.25278565306257	5.91091171286653	12	70	muscle tissue morphogenesis	0.171428571428571
GO:0001938	0.00229563408862381	2.25428658909982	9.37301714468835	19	111	positive regulation of endothelial cell proliferation	0.171171171171171
GO:0051092	0.000406719218318896	2.25803092941357	12.8351225765102	26	152	positive regulation of NF-kappaB transcription factor activity	0.171052631578947
GO:0072332	0.0106633850150923	2.2476008260447	6.41756128825509	13	76	intrinsic apoptotic signaling pathway by p53 class mediator	0.171052631578947
GO:2000379	0.0106633850150923	2.2476008260447	6.41756128825509	13	76	positive regulation of reactive oxygen species metabolic process	0.171052631578947
GO:0031570	0.00143813410780871	2.24886877828054	10.3863162954655	21	123	DNA integrity checkpoint signaling	0.170731707317073
GO:2001252	0.00837273707255696	2.24328991328503	6.92421086364365	14	82	positive regulation of chromosome organization	0.170731707317073
GO:0007093	0.00113943620672501	2.24664744354457	10.892965870854	22	129	mitotic cell cycle checkpoint signaling	0.170542635658915
GO:0000079	0.00518595495134247	2.23661833374293	7.93751001442077	16	94	regulation of cyclin-dependent protein serine/threonine kinase activity	0.170212765957447
GO:0002690	0.00518595495134247	2.23661833374293	7.93751001442077	16	94	positive regulation of leukocyte chemotaxis	0.170212765957447
GO:0010389	0.00518595495134247	2.23661833374293	7.93751001442077	16	94	regulation of G2/M transition of mitotic cell cycle	0.170212765957447
GO:1903035	0.00518595495134247	2.23661833374293	7.93751001442077	16	94	negative regulation of response to wounding	0.170212765957447
GO:0010799	0.041445591732053	2.23032911144799	3.96875500721038	8	47	regulation of peptidyl-threonine phosphorylation	0.170212765957447
GO:0014911	0.041445591732053	2.23032911144799	3.96875500721038	8	47	positive regulation of smooth muscle cell migration	0.170212765957447
GO:0016925	0.0320565487955502	2.22475711311589	4.47540458259894	9	53	protein sumoylation	0.169811320754717
GO:0071320	0.0320565487955502	2.22475711311589	4.47540458259894	9	53	cellular response to cAMP	0.169811320754717
GO:0097479	0.0320565487955502	2.22475711311589	4.47540458259894	9	53	synaptic vesicle localization	0.169811320754717
GO:0045446	0.00201727000213306	2.22829426453477	9.964108315975	20	118	endothelial cell differentiation	0.169491525423729
GO:0090303	0.0248942191424973	2.22047571415581	4.9820541579875	10	59	positive regulation of wound healing	0.169491525423729
GO:0061512	0.0193957903748633	2.21712668082095	5.48870373337606	11	65	protein localization to cilium	0.169230769230769
GO:0070936	0.0193957903748633	2.21712668082095	5.48870373337606	11	65	protein K48-linked ubiquitination	0.169230769230769
GO:0003158	0.00100211786129806	2.22469810399082	11.4840570421407	23	136	endothelium development	0.169117647058824
GO:0003208	0.0151532308845517	2.21447321515377	5.99535330876462	12	71	cardiac ventricle morphogenesis	0.169014084507042
GO:0050818	0.0151532308845517	2.21447321515377	5.99535330876462	12	71	regulation of coagulation	0.169014084507042
GO:0150116	0.0151532308845517	2.21447321515377	5.99535330876462	12	71	regulation of cell-substrate junction organization	0.169014084507042
GO:0055117	0.0118660764238758	2.21235251913265	6.50200288415318	13	77	regulation of cardiac muscle contraction	0.168831168831169
GO:0009199	0.00731757668070316	2.209278243761	7.5153020349303	15	89	ribonucleoside triphosphate metabolic process	0.168539325842697
GO:0051781	0.00731757668070316	2.209278243761	7.5153020349303	15	89	positive regulation of cell division	0.168539325842697
GO:0099111	0.000126017399969539	2.22065685497381	16.0439032206377	32	190	microtubule-based transport	0.168421052631579
GO:0008637	0.00358199032578966	2.20660354978542	9.03525076109598	18	107	apoptotic mitochondrial changes	0.168224299065421
GO:0051341	0.00358199032578966	2.20660354978542	9.03525076109598	18	107	regulation of oxidoreductase activity	0.168224299065421
GO:2000060	0.00358199032578966	2.20660354978542	9.03525076109598	18	107	positive regulation of ubiquitin-dependent protein catabolic process	0.168224299065421
GO:0031589	1.54396470575799e-07	2.23780062739631	30.6522993110079	61	363	cell-substrate adhesion	0.168044077134986
GO:0030099	7.79292602457497e-08	2.23918617394035	32.1722480371735	64	381	myeloid cell differentiation	0.167979002624672
GO:0019079	0.00140116395333709	2.20516562604822	11.0618490626502	22	131	viral genome replication	0.16793893129771
GO:0010970	0.000553890000824457	2.2051297390264	13.0884473642045	26	155	transport along microtubule	0.167741935483871
GO:0072593	2.2418871185181e-05	2.21001177203343	20.1815414196443	40	239	reactive oxygen species metabolic process	0.167364016736402
GO:0019724	7.74832791429804e-05	2.19495472186287	17.7327351385996	35	210	B cell mediated immunity	0.166666666666667
GO:0070665	0.000771834968184678	2.18727506426735	12.666239384714	25	150	positive regulation of leukocyte proliferation	0.166666666666667
GO:0071901	0.00247588717752056	2.18347213324792	10.1329915077712	20	120	negative regulation of protein serine/threonine kinase activity	0.166666666666667
GO:0032677	0.00502972539884656	2.18120204603581	8.61304278160551	17	102	regulation of interleukin-8 production	0.166666666666667
GO:0061097	0.00811407063587527	2.17969348659004	7.59974363082839	15	90	regulation of protein tyrosine kinase activity	0.166666666666667
GO:0043154	0.0131709934765731	2.1781887755102	6.58644448005127	13	78	negative regulation of cysteine-type endopeptidase activity involved in apoptotic process	0.166666666666667
GO:0070373	0.0131709934765731	2.1781887755102	6.58644448005127	13	78	negative regulation of ERK1 and ERK2 cascade	0.166666666666667
GO:0070227	0.0168299798634857	2.1774378585086	6.07979490466271	12	72	lymphocyte apoptotic process	0.166666666666667
GO:0072678	0.0215572585741463	2.17668789808917	5.57314532927415	11	66	T cell migration	0.166666666666667
GO:2000573	0.0215572585741463	2.17668789808917	5.57314532927415	11	66	positive regulation of DNA biosynthetic process	0.166666666666667
GO:0055008	0.027691275324071	2.17593889242521	5.0664957538856	10	60	cardiac muscle tissue morphogenesis	0.166666666666667
GO:0086002	0.0356930745719039	2.17519083969466	4.55984617849704	9	54	cardiac muscle cell action potential involved in contraction	0.166666666666667
GO:1902893	0.0356930745719039	2.17519083969466	4.55984617849704	9	54	regulation of pri-miRNA transcription by RNA polymerase II	0.166666666666667
GO:0032640	0.000268920380934343	2.17646380673012	15.2839288575549	30	181	tumor necrosis factor production	0.165745856353591
GO:0032680	0.000268920380934343	2.17646380673012	15.2839288575549	30	181	regulation of tumor necrosis factor production	0.165745856353591
GO:0000075	0.000426114832812049	2.17391185214615	14.2706297067778	28	169	cell cycle checkpoint signaling	0.165680473372781
GO:0071456	0.000852364137438383	2.1697882237728	12.7506809806121	25	151	cellular response to hypoxia	0.165562913907285
GO:0002455	0.00273623668821151	2.16172674282162	10.2174331036693	20	121	humoral immune response mediated by circulating immunoglobulin	0.165289256198347
GO:0000077	0.00346275273541851	2.15985115236876	9.71078352828073	19	115	DNA damage checkpoint signaling	0.165217391304348
GO:0032637	0.00556219043192916	2.15571284125379	8.6974843775036	17	103	interleukin-8 production	0.16504854368932
GO:0055072	0.0114321492320894	2.14812551120379	7.17753565133793	14	85	iron ion homeostasis	0.164705882352941
GO:2001242	0.000591832817348956	2.15659611645013	13.8484217272873	27	164	regulation of intrinsic apoptotic signaling pathway	0.164634146341463
GO:0042274	0.0186426021165771	2.1416167758518	6.16423650056081	12	73	ribosomal small subunit biogenesis	0.164383561643836
GO:0086003	0.0186426021165771	2.1416167758518	6.16423650056081	12	73	cardiac muscle cell contraction	0.164383561643836
GO:0016064	0.000130497130520466	2.15575176268818	17.4794103509053	34	207	immunoglobulin mediated immune response	0.164251207729469
GO:0006879	0.0238903339326826	2.13769335759782	5.65758692517225	11	67	cellular iron ion homeostasis	0.164179104477612
GO:0070527	0.0238903339326826	2.13769335759782	5.65758692517225	11	67	platelet aggregation	0.164179104477612
GO:0019058	2.61434641737147e-06	2.16593407949455	26.7679858996956	52	317	viral life cycle	0.16403785488959
GO:0042255	0.0307049314259811	2.13314861272326	5.15093734978369	10	61	ribosome assembly	0.163934426229508
GO:0043030	0.0307049314259811	2.13314861272326	5.15093734978369	10	61	regulation of macrophage activation	0.163934426229508
GO:0043954	0.0307049314259811	2.13314861272326	5.15093734978369	10	61	cellular component maintenance	0.163934426229508
GO:1904356	0.0307049314259811	2.13314861272326	5.15093734978369	10	61	regulation of telomere maintenance via telomere lengthening	0.163934426229508
GO:2000401	0.0307049314259811	2.13314861272326	5.15093734978369	10	61	regulation of lymphocyte migration	0.163934426229508
GO:1990748	0.00382123786476383	2.13745924469026	9.79522512417882	19	116	cellular detoxification	0.163793103448276
GO:0030317	0.0048410366204754	2.13427355420179	9.28857554879026	18	110	flagellated sperm motility	0.163636363636364
GO:0097722	0.0048410366204754	2.13427355420179	9.28857554879026	18	110	sperm motility	0.163636363636364
GO:0031113	0.0396025767048391	2.12777962163956	4.64428777439513	9	55	regulation of microtubule polymerization	0.163636363636364
GO:0061614	0.0396025767048391	2.12777962163956	4.64428777439513	9	55	pri-miRNA transcription by RNA polymerase II	0.163636363636364
GO:0042060	7.23359758664469e-08	2.17043819416341	35.6343534689954	69	422	wound healing	0.163507109004739
GO:0048661	0.00613963004774113	2.1308095952024	8.7819259734017	17	104	positive regulation of smooth muscle cell proliferation	0.163461538461538
GO:1904029	0.00779609102647614	2.1270162861373	8.27527639801314	16	98	regulation of cyclin-dependent protein kinase activity	0.163265306122449
GO:0042770	0.000569442500057145	2.1282464048079	14.523954494472	28	172	signal transduction in response to DNA damage	0.162790697674419
GO:0014031	0.0126253319255086	2.11816634758562	7.26197724723602	14	86	mesenchymal cell development	0.162790697674419
GO:0045921	0.0126253319255086	2.11816634758562	7.26197724723602	14	86	positive regulation of exocytosis	0.162790697674419
GO:2000117	0.0126253319255086	2.11816634758562	7.26197724723602	14	86	negative regulation of cysteine-type endopeptidase activity	0.162790697674419
GO:0002253	4.91891473707719e-07	2.15074589339591	31.665598461785	61	375	activation of immune response	0.162666666666667
GO:0006635	0.0205972698078934	2.10695121199038	6.2486780964589	12	74	fatty acid beta-oxidation	0.162162162162162
GO:0051881	0.0205972698078934	2.10695121199038	6.2486780964589	12	74	regulation of mitochondrial membrane potential	0.162162162162162
GO:0050729	0.00181328077495899	2.11178412314862	11.9907066175292	23	142	positive regulation of inflammatory response	0.161971830985915
GO:0000045	0.00859024416493982	2.10126640748297	8.35971799391123	16	99	autophagosome assembly	0.161616161616162
GO:0008630	0.00859024416493982	2.10126640748297	8.35971799391123	16	99	intrinsic apoptotic signaling pathway in response to DNA damage	0.161616161616162
GO:0032602	0.00859024416493982	2.10126640748297	8.35971799391123	16	99	chemokine production	0.161616161616162
GO:0033209	0.00859024416493982	2.10126640748297	8.35971799391123	16	99	tumor necrosis factor-mediated signaling pathway	0.161616161616162
GO:0060996	0.00859024416493982	2.10126640748297	8.35971799391123	16	99	dendritic spine development	0.161616161616162
GO:0071706	0.000433690137921305	2.10608540395774	15.7061368370453	30	186	tumor necrosis factor superfamily cytokine production	0.161290322580645
GO:1903555	0.000433690137921305	2.10608540395774	15.7061368370453	30	186	regulation of tumor necrosis factor superfamily cytokine production	0.161290322580645
GO:0034614	0.0012518221725377	2.1025311449476	13.0884473642045	25	155	cellular response to reactive oxygen species	0.161290322580645
GO:0007062	0.033942578251186	2.09200411300984	5.23537894568178	10	62	sister chromatid cohesion	0.161290322580645
GO:0032615	0.033942578251186	2.09200411300984	5.23537894568178	10	62	interleukin-12 production	0.161290322580645
GO:0032655	0.033942578251186	2.09200411300984	5.23537894568178	10	62	regulation of interleukin-12 production	0.161290322580645
GO:0046824	0.033942578251186	2.09200411300984	5.23537894568178	10	62	positive regulation of nucleocytoplasmic transport	0.161290322580645
GO:1902750	0.033942578251186	2.09200411300984	5.23537894568178	10	62	negative regulation of cell cycle G2/M phase transition	0.161290322580645
GO:0051262	0.0139128106246006	2.08902798297069	7.34641884313411	14	87	protein tetramerization	0.160919540229885
GO:2000177	0.0139128106246006	2.08902798297069	7.34641884313411	14	87	regulation of neural precursor cell proliferation	0.160919540229885
GO:0000070	0.000865216514817738	2.09492319066787	14.1861881108797	27	168	mitotic sister chromatid segregation	0.160714285714286
GO:0002526	0.00586659677038198	2.08861845060644	9.45745874058644	18	112	acute inflammatory response	0.160714285714286
GO:0009141	0.00586659677038198	2.08861845060644	9.45745874058644	18	112	nucleoside triphosphate metabolic process	0.160714285714286
GO:0032609	0.00586659677038198	2.08861845060644	9.45745874058644	18	112	interferon-gamma production	0.160714285714286
GO:0032649	0.00586659677038198	2.08861845060644	9.45745874058644	18	112	regulation of interferon-gamma production	0.160714285714286
GO:0002090	0.0437922774392352	2.08238590222511	4.72872937029322	9	56	regulation of receptor internalization	0.160714285714286
GO:0022029	0.0437922774392352	2.08238590222511	4.72872937029322	9	56	telencephalon cell migration	0.160714285714286
GO:0042733	0.0437922774392352	2.08238590222511	4.72872937029322	9	56	embryonic digit morphogenesis	0.160714285714286
GO:0043388	0.0437922774392352	2.08238590222511	4.72872937029322	9	56	positive regulation of DNA binding	0.160714285714286
GO:0050671	0.00251535691835246	2.08937724851493	11.5684986380388	22	137	positive regulation of lymphocyte proliferation	0.160583941605839
GO:0051100	0.00109002339127722	2.09076981274825	13.6795385354911	26	162	negative regulation of binding	0.160493827160494
GO:0046209	0.0177525144745267	2.08172644057623	6.83976926774555	13	81	nitric oxide metabolic process	0.160493827160494
GO:0071260	0.0177525144745267	2.08172644057623	6.83976926774555	13	81	cellular response to mechanical stimulus	0.160493827160494
GO:2000278	0.00744026530900848	2.08268197361993	8.95080916519789	17	106	regulation of DNA biosynthetic process	0.160377358490566
GO:0009636	4.04679859283508e-05	2.09913166755272	22.1236981253004	42	262	response to toxic substance	0.16030534351145
GO:0006910	0.00944755985368	2.07612962117754	8.44415958980933	16	100	phagocytosis, recognition	0.16
GO:0043627	0.0227000623219041	2.07338614221979	6.33311969235699	12	75	response to estrogen	0.16
GO:0051098	1.68615109906219e-06	2.1022916375144	30.6522993110079	58	363	regulation of binding	0.159779614325069
GO:0097193	1.955840229209e-05	2.09276657603575	24.3191796186509	46	288	intrinsic apoptotic signaling pathway	0.159722222222222
GO:0030316	0.0120129962424297	2.0688442698482	7.93751001442077	15	94	osteoclast differentiation	0.159574468085106
GO:0051702	0.0120129962424297	2.0688442698482	7.93751001442077	15	94	biological process involved in interaction with symbiont	0.159574468085106
GO:0032273	0.00275951330636442	2.07124372387251	11.6529402339369	22	138	positive regulation of protein polymerization	0.159420289855072
GO:0032946	0.00275951330636442	2.07124372387251	11.6529402339369	22	138	positive regulation of mononuclear cell proliferation	0.159420289855072
GO:0007004	0.0290987500345766	2.06373819459697	5.82647011696843	11	69	telomere maintenance via telomerase	0.159420289855072
GO:0045669	0.0290987500345766	2.06373819459697	5.82647011696843	11	69	positive regulation of osteoblast differentiation	0.159420289855072
GO:0006261	0.0018987583032184	2.06514648096734	12.7506809806121	24	151	DNA-dependent DNA replication	0.158940397350993
GO:0030902	0.0018987583032184	2.06514648096734	12.7506809806121	24	151	hindbrain development	0.158940397350993
GO:0046902	0.0374111640547441	2.05241223592712	5.31982054157988	10	63	regulation of mitochondrial membrane permeability	0.158730158730159
GO:0016575	0.019519718912579	2.05143633540373	6.92421086364365	13	82	histone deacetylation	0.158536585365854
GO:0043242	0.019519718912579	2.05143633540373	6.92421086364365	13	82	negative regulation of protein-containing complex disassembly	0.158536585365854
GO:2001057	0.019519718912579	2.05143633540373	6.92421086364365	13	82	reactive nitrogen species metabolic process	0.158536585365854
GO:0009611	6.69573463235145e-09	2.10243571689355	46.3584361480532	87	549	response to wounding	0.158469945355191
GO:0000819	0.00039493238689489	2.06244636008051	17.0572023714148	32	202	sister chromatid segregation	0.158415841584158
GO:0051261	0.00706261395450798	2.04486564299424	9.62634193238263	18	114	protein depolymerization	0.157894736842105
GO:0032479	0.0131854606012568	2.04286398467433	8.02195161031886	15	95	regulation of type I interferon production	0.157894736842105
GO:0032606	0.0131854606012568	2.04286398467433	8.02195161031886	15	95	type I interferon production	0.157894736842105
GO:0050764	0.0131854606012568	2.04286398467433	8.02195161031886	15	95	regulation of phagocytosis	0.157894736842105
GO:0006809	0.0249569393169313	2.04086998087954	6.41756128825509	12	76	nitric oxide biosynthetic process	0.157894736842105
GO:0031100	0.0249569393169313	2.04086998087954	6.41756128825509	12	76	animal organ regeneration	0.157894736842105
GO:0033619	0.0482686308827587	2.03888358778626	4.81317096619132	9	57	membrane protein proteolysis	0.157894736842105
GO:0051289	0.0482686308827587	2.03888358778626	4.81317096619132	9	57	protein homotetramerization	0.157894736842105
GO:0043161	6.42265070125828e-07	2.07522260156791	34.7899375100144	65	412	proteasome-mediated ubiquitin-dependent protein catabolic process	0.157766990291262
GO:0006260	7.26489627813254e-05	2.05729407578723	21.9548149335042	41	260	DNA replication	0.157692307692308
GO:0032635	0.00143153909601896	2.04528441555437	13.9328633231854	26	165	interleukin-6 production	0.157575757575758
GO:0032675	0.00143153909601896	2.04528441555437	13.9328633231854	26	165	regulation of interleukin-6 production	0.157575757575758
GO:0046661	0.00143153909601896	2.04528441555437	13.9328633231854	26	165	male sex differentiation	0.157575757575758
GO:0051224	0.00482663043222363	2.03978997407605	10.7240826790578	20	127	negative regulation of protein transport	0.15748031496063
GO:2000116	0.000164913725548007	2.05071439786466	19.8437750360519	37	235	regulation of cysteine-type endopeptidase activity	0.157446808510638
GO:0034440	0.00895398058343931	2.03666985188724	9.11969235699407	17	108	lipid oxidation	0.157407407407407
GO:0046330	0.0167890944603308	2.03308232291002	7.5153020349303	14	89	positive regulation of JNK cascade	0.157303370786517
GO:1900407	0.0167890944603308	2.03308232291002	7.5153020349303	14	89	regulation of cellular response to oxidative stress	0.157303370786517
GO:0045637	0.000375314386759496	2.04325975561687	17.7327351385996	33	210	regulation of myeloid cell differentiation	0.157142857142857
GO:1904063	0.0113652087094095	2.02760977784382	8.61304278160551	16	102	negative regulation of cation transmembrane transport	0.156862745098039
GO:1902850	0.00286539134600437	2.02603627479399	12.4129145970197	23	147	microtubule cytoskeleton organization involved in mitosis	0.156462585034014
GO:1903531	0.00286539134600437	2.02603627479399	12.4129145970197	23	147	negative regulation of secretion by cell	0.156462585034014
GO:0030888	0.0411171540474114	2.01428672466228	5.40426213747797	10	64	regulation of B cell proliferation	0.15625
GO:0048857	0.0411171540474114	2.01428672466228	5.40426213747797	10	64	neural nucleus development	0.15625
GO:0050771	0.0411171540474114	2.01428672466228	5.40426213747797	10	64	negative regulation of axonogenesis	0.15625
GO:1900076	0.0411171540474114	2.01428672466228	5.40426213747797	10	64	regulation of cellular response to insulin stimulus	0.15625
GO:0008584	0.00361488349864789	2.01867174066548	11.9062650216311	22	141	male gonad development	0.156028368794326
GO:0050921	0.00361488349864789	2.01867174066548	11.9062650216311	22	141	positive regulation of chemotaxis	0.156028368794326
GO:0071478	0.00093569019441203	2.02149271127454	15.7061368370453	29	186	cellular response to radiation	0.155913978494624
GO:0045732	0.000246305981732045	2.02503360716953	19.5060086524595	36	231	positive regulation of protein catabolic process	0.155844155844156
GO:0048644	0.0273737140048801	2.0093543168113	6.50200288415318	12	77	muscle organ morphogenesis	0.155844155844156
GO:0002688	0.00667501732465552	2.01223847942021	10.3018746995674	19	122	regulation of leukocyte chemotaxis	0.155737704918033
GO:0030901	0.0183871251648358	2.00621368353878	7.59974363082839	14	90	midbrain development	0.155555555555556
GO:2001056	0.00312823703382763	2.00970988446727	12.4973561929178	23	148	positive regulation of cysteine-type endopeptidase activity	0.155405405405405
GO:0019395	0.0124324304615897	2.00418640519996	8.6974843775036	16	103	fatty acid oxidation	0.155339805825243
GO:1905037	0.0124324304615897	2.00418640519996	8.6974843775036	16	103	autophagosome organization	0.155339805825243
GO:0010498	1.4956518865477e-07	2.0404256343589	41.3763819900657	76	490	proteasomal protein catabolic process	0.155102040816327
GO:0043280	0.00576422253776361	2.00212754703231	10.892965870854	20	129	positive regulation of cysteine-type endopeptidase activity involved in apoptotic process	0.155038759689922
GO:0046546	0.0039451773313242	2.00173187940988	11.9907066175292	22	142	development of primary male sexual characteristics	0.154929577464789
GO:0097061	0.0234457657602728	1.9934158522564	7.09309405543983	13	84	dendritic spine organization	0.154761904761905
GO:0006979	6.13148881753938e-07	2.0293619216033	37.6609517705496	69	446	response to oxidative stress	0.154708520179372
GO:0045766	0.00128221093643464	2.00199487393154	15.2839288575549	28	181	positive regulation of angiogenesis	0.154696132596685
GO:1904018	0.00128221093643464	2.00199487393154	15.2839288575549	28	181	positive regulation of vasculature development	0.154696132596685
GO:0031349	7.75231810485153e-05	2.01145726696732	23.4747636596699	43	278	positive regulation of defense response	0.154676258992806
GO:0120162	0.015795553343849	1.99280441080273	8.19083480211505	15	97	positive regulation of cold-induced thermogenesis	0.154639175257732
GO:2001237	0.015795553343849	1.99280441080273	8.19083480211505	15	97	negative regulation of extrinsic apoptotic signaling pathway	0.154639175257732
GO:0014812	0.0107041144183493	1.99263674614306	9.28857554879026	17	110	muscle cell migration	0.154545454545455
GO:0032611	0.0107041144183493	1.99263674614306	9.28857554879026	17	110	interleukin-1 beta production	0.154545454545455
GO:0032651	0.0107041144183493	1.99263674614306	9.28857554879026	17	110	regulation of interleukin-1 beta production	0.154545454545455
GO:0048259	0.0107041144183493	1.99263674614306	9.28857554879026	17	110	regulation of receptor-mediated endocytosis	0.154545454545455
GO:0003231	0.00728682742073005	1.99277307199842	10.3863162954655	19	123	cardiac ventricle development	0.154471544715447
GO:0007018	4.15802507687558e-06	2.01852906595933	32.2566896330716	59	382	microtubule-based movement	0.154450261780105
GO:0043624	0.00497837073456275	1.993127090301	11.4840570421407	21	136	cellular protein complex disassembly	0.154411764705882
GO:0099024	0.00497837073456275	1.993127090301	11.4840570421407	21	136	plasma membrane invagination	0.154411764705882
GO:0009411	0.0034110805341433	1.99364264319335	12.5817977888159	23	149	response to UV	0.154362416107383
GO:0060759	0.00234271576270316	1.99428161296981	13.6795385354911	25	162	regulation of response to cytokine stimulus	0.154320987654321
GO:0016032	1.73696760390791e-06	2.01819831088124	35.0432622977087	64	415	viral process	0.15421686746988
GO:0006937	0.00202743012579428	1.98760596316866	14.2706297067778	26	169	regulation of muscle contraction	0.153846153846154
GO:0051225	0.00921936002174173	1.98255103821323	9.87966672007691	18	117	spindle assembly	0.153846153846154
GO:0014033	0.0200978724567005	1.98004293090445	7.68418522672649	14	91	neural crest cell differentiation	0.153846153846154
GO:0051983	0.0200978724567005	1.98004293090445	7.68418522672649	14	91	regulation of chromosome segregation	0.153846153846154
GO:0030500	0.0299560268282086	1.97879367286633	6.58644448005127	12	78	regulation of bone mineralization	0.153846153846154
GO:0002720	0.0450664928969657	1.97754759562525	5.48870373337606	10	65	positive regulation of cytokine production involved in immune response	0.153846153846154
GO:0010965	0.0450664928969657	1.97754759562525	5.48870373337606	10	65	regulation of mitotic sister chromatid separation	0.153846153846154
GO:0060389	0.0450664928969657	1.97754759562525	5.48870373337606	10	65	pathway-restricted SMAD protein phosphorylation	0.153846153846154
GO:0090307	0.0450664928969657	1.97754759562525	5.48870373337606	10	65	mitotic spindle assembly	0.153846153846154
GO:0021700	9.16609472748585e-05	1.9942470082797	23.6436468514661	43	280	developmental maturation	0.153571428571429
GO:0007568	1.84068231569156e-05	1.99729731577424	28.6257010094536	52	339	aging	0.153392330383481
GO:0001909	0.00794333254683393	1.97367843424181	10.4707578913636	19	124	leukocyte mediated cytotoxicity	0.153225806451613
GO:0007059	1.59765751684997e-05	1.99461474545682	29.2167921807403	53	346	chromosome segregation	0.153179190751445
GO:0014066	0.0116753604517161	1.97132284921369	9.37301714468835	17	111	regulation of phosphatidylinositol 3-kinase signaling	0.153153153153153
GO:0043281	0.000722832646497236	1.98006368241949	17.6482935427015	32	209	regulation of cysteine-type endopeptidase activity involved in apoptotic process	0.15311004784689
GO:0002367	0.0172412393048199	1.96867931496099	8.27527639801314	15	98	cytokine production involved in immune response	0.153061224489796
GO:0032642	0.0172412393048199	1.96867931496099	8.27527639801314	15	98	regulation of chemokine production	0.153061224489796
GO:1902882	0.0172412393048199	1.96867931496099	8.27527639801314	15	98	regulation of response to oxidative stress	0.153061224489796
GO:2001243	0.0172412393048199	1.96867931496099	8.27527639801314	15	98	negative regulation of intrinsic apoptotic signaling pathway	0.153061224489796
GO:0010507	0.0256148909667504	1.9656143707483	7.17753565133793	13	85	negative regulation of autophagy	0.152941176470588
GO:2000377	0.00321000654012624	1.97128659799788	13.2573305560006	24	157	regulation of reactive oxygen species metabolic process	0.152866242038217
GO:0034599	8.63869828179723e-05	1.98255063621916	24.3191796186509	44	288	cellular response to oxidative stress	0.152777777777778
GO:1901880	0.0383632395083317	1.96189829800564	6.07979490466271	11	72	negative regulation of protein depolymerization	0.152777777777778
GO:1903036	0.0383632395083317	1.96189829800564	6.07979490466271	11	72	positive regulation of response to wounding	0.152777777777778
GO:0046683	0.00684622593761922	1.96582232456672	11.0618490626502	20	131	response to organophosphorus	0.152671755725191
GO:1904950	0.00684622593761922	1.96582232456672	11.0618490626502	20	131	negative regulation of establishment of protein localization	0.152671755725191
GO:0043122	0.000259745862057506	1.97614052762361	21.0259573786252	38	249	regulation of I-kappaB kinase/NF-kappaB signaling	0.152610441767068
GO:0006909	5.19651892641664e-05	1.98166464355827	26.0080115366127	47	308	phagocytosis	0.152597402597403
GO:0043405	0.00190789014375129	1.96818532818533	14.9461624739625	27	177	regulation of MAP kinase activity	0.152542372881356
GO:0002274	0.000542644586742637	1.9713936856794	18.8304758852748	34	223	myeloid leukocyte activation	0.152466367713004
GO:0050680	0.00277399914911083	1.96535573597677	13.8484217272873	25	164	negative regulation of epithelial cell proliferation	0.152439024390244
GO:0031396	0.00078530783925908	1.96882367021855	17.7327351385996	32	210	regulation of protein ubiquitination	0.152380952380952
GO:0010952	0.00113769267482799	1.96608716802372	16.6349943919244	30	197	positive regulation of peptidase activity	0.152284263959391
GO:0002684	5.08165239444541e-12	2.03664914337994	75.9974363082839	137	900	positive regulation of immune system process	0.152222222222222
GO:0048659	0.00165030265124519	1.96314824904651	15.5372536452492	28	184	smooth muscle cell proliferation	0.152173913043478
GO:0001539	0.00590254924432315	1.95882642998028	11.6529402339369	21	138	cilium or flagellum-dependent cell motility	0.152173913043478
GO:0060285	0.00590254924432315	1.95882642998028	11.6529402339369	21	138	cilium-dependent cell motility	0.152173913043478
GO:0032465	0.0219258862479352	1.95454322320946	7.76862682262458	14	92	regulation of cytokinesis	0.152173913043478
GO:0048469	0.00239755338804772	1.95996008426655	14.4395128985739	26	171	cell maturation	0.152046783625731
GO:0051048	0.00239755338804772	1.95996008426655	14.4395128985739	26	171	negative regulation of secretion	0.152046783625731
GO:0060294	0.00864682180490196	1.95494407266929	10.5551994872617	19	125	cilium movement involved in cell motility	152
GO:0010770	0.0327093196994519	1.94914528694957	6.67088607594937	12	79	positive regulation of cell morphogenesis involved in differentiation	0.151898734177215
GO:0043406	0.0127148234262706	1.95045766590389	9.45745874058644	17	112	positive regulation of MAP kinase activity	0.151785714285714
GO:0061351	0.00509050289963213	1.95256496503387	12.2440314052235	22	145	neural precursor cell proliferation	0.151724137931034
GO:0002696	4.44239719161436e-06	1.97553372934188	34.5366127223201	62	409	positive regulation of leukocyte activation	0.15158924205379
GO:0051258	8.81608883363817e-05	1.96358816964286	25.0791539817337	45	297	protein polymerization	0.151515151515152
GO:0010717	0.0187860598655127	1.94512862616311	8.35971799391123	15	99	regulation of epithelial to mesenchymal transition	0.151515151515152
GO:0030838	0.0187860598655127	1.94512862616311	8.35971799391123	15	99	positive regulation of actin filament polymerization	0.151515151515152
GO:0031341	0.0187860598655127	1.94512862616311	8.35971799391123	15	99	regulation of cell killing	0.151515151515152
GO:0046626	0.049264570454612	1.94212057833955	5.57314532927415	10	66	regulation of insulin receptor signaling pathway	0.151515151515152
GO:0010506	5.30056855480029e-05	1.96398926225274	26.7679858996956	48	317	regulation of autophagy	0.151419558359621
GO:0062197	3.18793839056341e-05	1.96456876456876	28.4568178176574	51	337	cellular response to chemical stress	0.1513353115727
GO:0050871	0.00439143989198414	1.94693554646685	12.8351225765102	23	152	positive regulation of B cell activation	0.151315789473684
GO:0060348	0.00106858835314773	1.95034482758621	17.3105271591091	31	205	bone development	0.151219512195122
GO:0071887	0.0161097831731473	1.93703940362087	8.95080916519789	16	106	leukocyte apoptotic process	0.150943396226415
GO:0010950	0.00224906384324429	1.94205954074375	15.1150456657587	27	179	positive regulation of endopeptidase activity	0.150837988826816
GO:0042058	0.0418620622713851	1.93014177111157	6.16423650056081	11	73	regulation of epidermal growth factor receptor signaling pathway	0.150684931506849
GO:0043123	0.00194340762912539	1.93807004817136	15.7061368370453	28	186	positive regulation of I-kappaB kinase/NF-kappaB signaling	0.150537634408602
GO:0106027	0.0238756629673499	1.92968907773461	7.85306841852267	14	93	neuron projection organization	0.150537634408602
GO:0031623	0.0138256188097411	1.93002717391304	9.54190033648454	17	113	receptor internalization	0.150442477876106
GO:0051099	0.0028237238297786	1.9330664741781	14.6083960903701	26	173	positive regulation of binding	0.15028901734104
GO:0050867	5.28886447990113e-06	1.95129039758196	35.4654702771992	63	420	positive regulation of cell activation	0.15
GO:0051091	0.000310794738282887	1.936484321355	21.9548149335042	39	260	positive regulation of DNA-binding transcription factor activity	0.15
GO:0048660	0.00243834721846702	1.92925278219396	15.1994872616568	27	180	regulation of smooth muscle cell proliferation	0.15
GO:0071897	0.00243834721846702	1.92925278219396	15.1994872616568	27	180	DNA biosynthetic process	0.15
GO:0002761	0.0118737909111081	1.92390199841933	10.1329915077712	18	120	regulation of myeloid leukocyte differentiation	0.15
GO:0007052	0.0118737909111081	1.92390199841933	10.1329915077712	18	120	mitotic spindle organization	0.15
GO:0045807	0.0204340304558362	1.92213207121929	8.44415958980933	15	100	positive regulation of endocytosis	0.15
GO:0001819	1.65387675767733e-06	1.95401647365166	39.4342252844095	70	467	positive regulation of cytokine production	0.149892933618844
GO:0050679	0.00125500726743244	1.92795454545455	17.4794103509053	31	207	positive regulation of epithelial cell proliferation	0.14975845410628
GO:0033044	0.00210600001752988	1.9257675345345	15.7905784329434	28	187	regulation of chromosome organization	0.149732620320856
GO:0006911	0.0102041407232361	1.91851614738939	10.7240826790578	19	127	phagocytosis, engulfment	0.149606299212598
GO:0001776	0.0303902455614086	1.91226558190844	7.34641884313411	13	87	leukocyte homeostasis	0.149425287356322
GO:0051251	2.84437711327517e-05	1.93281963615952	30.5678577151098	54	362	positive regulation of lymphocyte activation	0.149171270718232
GO:0045930	0.00070175322629825	1.91775549805951	19.8437750360519	35	235	negative regulation of mitotic cell cycle	0.148936170212766
GO:0030308	0.0022801086175296	1.91361880231809	15.8750200288415	28	188	negative regulation of cell growth	0.148936170212766
GO:0016241	0.00754919119018061	1.90951923076923	11.9062650216311	21	141	regulation of macroautophagy	0.148936170212766
GO:2001233	3.54863886942602e-05	1.92764112798714	30.0612081397212	53	356	regulation of apoptotic signaling pathway	0.148876404494382
GO:0070372	0.000113418653378922	1.92327070509407	26.0924531325108	46	309	regulation of ERK1 and ERK2 cascade	0.148867313915858
GO:0003206	0.0128818131990068	1.90511152935915	10.2174331036693	18	121	cardiac chamber morphogenesis	0.148760330578512
GO:0014074	0.00649822934836504	1.90573933229482	12.4973561929178	22	148	response to purine-containing compound	0.148648648648649
GO:0002437	0.0455749625427884	1.89939338792842	6.2486780964589	11	74	inflammatory response to antigenic stimulus	0.148648648648649
GO:1901988	0.000525060014712545	1.91370735164728	21.0259573786252	37	249	negative regulation of cell cycle phase transition	0.14859437751004
GO:0006476	0.0221891391273556	1.89967031987882	8.52860118570742	15	101	protein deacetylation	0.148514851485149
GO:0042102	0.0221891391273556	1.89967031987882	8.52860118570742	15	101	positive regulation of T cell proliferation	0.148514851485149
GO:0046939	0.0221891391273556	1.89967031987882	8.52860118570742	15	101	nucleotide phosphorylation	0.148514851485149
GO:0071695	0.000877369825615058	1.91005917159763	19.3371254606634	34	229	anatomical structure maturation	0.148471615720524
GO:1903533	0.0387494712203333	1.89242663563056	6.83976926774555	12	81	regulation of protein targeting	0.148148148148148
GO:0045862	3.10181555377234e-05	1.912951532015	31.4122736740907	55	372	positive regulation of proteolysis	0.147849462365591
GO:0002429	0.000220284262490833	1.90455241411133	24.5725044063451	43	291	immune response-activating cell surface receptor signaling pathway	0.147766323024055
GO:0002757	0.000220284262490833	1.90455241411133	24.5725044063451	43	291	immune response-activating signal transduction	0.147766323024055
GO:0031110	0.0330060280422835	1.88665816326531	7.43086043903221	13	88	regulation of microtubule polymerization or depolymerization	0.147727272727273
GO:0071900	4.46543349323433e-05	1.90840262806693	30.3145329274155	53	359	regulation of protein serine/threonine kinase activity	0.147632311977716
GO:0032103	9.06783189373216e-06	1.91296746731529	36.0565614484858	63	427	positive regulation of response to external stimulus	0.147540983606557
GO:0006942	0.0281581279973141	1.88182183459784	8.02195161031886	14	95	regulation of striated muscle contraction	0.147368421052632
GO:0008585	0.0281581279973141	1.88182183459784	8.02195161031886	14	95	female gonad development	0.147368421052632
GO:1901379	0.0281581279973141	1.88182183459784	8.02195161031886	14	95	regulation of potassium ion transmembrane transport	0.147368421052632
GO:0051607	0.000458018532963544	1.89308219413932	22.3770229129947	39	265	defense response to virus	0.147169811320755
GO:0140546	0.000458018532963544	1.89308219413932	22.3770229129947	39	265	defense response to symbiont	0.147169811320755
GO:0048872	0.000396118281614664	1.89196446552843	22.9681140842814	40	272	homeostasis of number of cells	0.147058823529412
GO:1902106	0.0240553340270015	1.87772493063813	8.61304278160551	15	102	negative regulation of leukocyte differentiation	0.147058823529412
GO:0050678	3.12310265480874e-05	1.90013013871375	32.1722480371735	56	381	regulation of epithelial cell proliferation	0.146981627296588
GO:0045787	0.000153980003974588	1.89400871061011	26.4302195161032	46	313	positive regulation of cell cycle	0.146964856230032
GO:0034766	0.0205752351118794	1.8742244666598	9.20413395289216	16	109	negative regulation of ion transmembrane transport	0.146788990825688
GO:0018108	3.88911699908657e-05	1.89467971821756	31.665598461785	55	375	peptidyl-tyrosine phosphorylation	0.146666666666667
GO:0001959	0.00760327947059347	1.87574166132136	12.666239384714	22	150	regulation of cytokine-mediated signaling pathway	0.146666666666667
GO:0006278	0.0495065860182529	1.86960589171975	6.33311969235699	11	75	RNA-dependent DNA biosynthetic process	0.146666666666667
GO:0098732	0.0176174951787884	1.87121212121212	9.79522512417882	17	116	macromolecule deacylation	0.146551724137931
GO:0010811	0.0150993644300278	1.86860433232794	10.3863162954655	18	123	positive regulation of cell-substrate adhesion	0.146341463414634
GO:0008625	0.0420460001873769	1.86528270964217	6.92421086364365	12	82	extrinsic apoptotic signaling pathway via death domain receptors	0.146341463414634
GO:0007098	0.0129522384669812	1.86633560577223	10.9774074667521	19	130	centrosome cycle	0.146153846153846
GO:0002682	6.71583880280383e-16	1.98411085981523	120.244832558885	208	1424	regulation of immune system process	0.146067415730337
GO:0002768	0.000178828692833718	1.87970405531405	26.5991027078994	46	315	immune response-regulating cell surface receptor signaling pathway	0.146031746031746
GO:0043068	7.73948305505176e-07	1.89888607594937	46.8650857234418	81	555	positive regulation of programmed cell death	0.145945945945946
GO:0007249	0.000398031144252316	1.8749512987013	23.7280884473642	41	281	I-kappaB kinase/NF-kappaB signaling	0.145907473309609
GO:0010324	0.00955183498642429	1.86261726078799	12.1595898093254	21	144	membrane invagination	0.145833333333333
GO:0002718	0.030499398611586	1.85876383333074	8.10639320621695	14	96	regulation of cytokine production involved in immune response	0.145833333333333
GO:0051304	0.030499398611586	1.85876383333074	8.10639320621695	14	96	chromosome separation	0.145833333333333
GO:0018212	4.85641808645563e-05	1.87674731891791	31.9189232494792	55	378	peptidyl-tyrosine modification	0.145502645502645
GO:0070371	0.000144081096530217	1.87200732814257	27.8657266463708	48	330	ERK1 and ERK2 cascade	0.145454545454545
GO:0046777	0.00148558452793102	1.86234316311037	19.1682422688672	33	227	protein autophosphorylation	0.145374449339207
GO:0033002	0.000957067496717319	1.86078036270379	20.9415157827271	36	248	muscle cell proliferation	0.145161290322581
GO:0045089	0.0139880798782121	1.84956328882385	11.0618490626502	19	131	positive regulation of innate immune response	0.145038167938931
GO:0071214	0.000155034309716897	1.86528182113641	27.9501682422689	48	331	cellular response to abiotic stimulus	0.145015105740181
GO:0104004	0.000155034309716897	1.86528182113641	27.9501682422689	48	331	cellular response to environmental stimulus	0.145015105740181
GO:0071902	0.00288588718805991	1.85446057153192	16.8883191796187	29	200	positive regulation of protein serine/threonine kinase activity	145
GO:0098754	0.00885706214546624	1.84666699560862	12.8351225765102	22	152	detoxification	0.144736842105263
GO:1903320	0.00119264326953562	1.85213829049253	20.4348662073386	35	242	regulation of protein modification by small protein conjugation or removal	0.144628099173554
GO:0043112	0.00655132736034478	1.84536893809873	14.0173049190835	24	166	receptor metabolic process	0.144578313253012
GO:0043409	0.00485548651398884	1.84443980456842	15.1994872616568	26	180	negative regulation of MAPK cascade	0.144444444444444
GO:0032436	0.038716432747308	1.83743870924993	7.59974363082839	13	90	positive regulation of proteasomal ubiquitin-dependent protein catabolic process	0.144444444444444
GO:0045638	0.038716432747308	1.83743870924993	7.59974363082839	13	90	negative regulation of myeloid cell differentiation	0.144444444444444
GO:0002573	0.00267968913856666	1.84339208484559	17.5638519468034	30	208	myeloid leukocyte differentiation	0.144230769230769
GO:0070482	0.000134059526562744	1.85229169553141	29.3012337766384	50	347	response to oxygen levels	0.144092219020173
GO:0051101	0.0205600078627136	1.83394317692639	9.964108315975	17	118	regulation of DNA binding	0.144067796610169
GO:0071331	0.00954405694984081	1.83246257877187	12.9195641724083	22	153	cellular response to hexose stimulus	0.143790849673203
GO:0009895	0.000257538899834214	1.84485603556908	27.0213106873898	46	320	negative regulation of catabolic process	0.14375
GO:0002831	0.000222689654887738	1.8451154777426	27.6124018586765	47	327	regulation of response to biotic stimulus	0.143730886850153
GO:0007254	0.00705572027096425	1.83235646819462	14.1017465149816	24	167	JNK cascade	0.143712574850299
GO:0010639	0.000144016878569387	1.84596635966316	29.3856753725365	50	348	negative regulation of organelle organization	0.14367816091954
GO:0001659	0.0060714496506172	1.83237435516986	14.6928376862682	25	174	temperature homeostasis	0.14367816091954
GO:0007584	0.0060714496506172	1.83237435516986	14.6928376862682	25	174	response to nutrient	0.14367816091954
GO:0030705	0.00387883803064612	1.83265150317523	16.4661112001282	28	195	cytoskeleton-dependent intracellular transport	0.143589743589744
GO:0031334	0.00159750847076309	1.83391977480647	20.0126582278481	34	237	positive regulation of protein-containing complex assembly	0.143459915611814
GO:0002460	0.000133734848120132	1.84010928961749	30.0612081397212	51	356	adaptive immune response based on somatic recombination of immune receptors built from immunoglobulin superfamily domains	0.143258426966292
GO:0002764	1.31106010269964e-05	1.84750639912768	39.5186668803076	67	468	immune response-regulating signaling pathway	0.143162393162393
GO:0010035	1.58391805324656e-06	1.85123415610407	48.4694760455055	82	574	response to inorganic substance	0.142857142857143
GO:0036293	0.000296912311516245	1.83127035830619	27.190193879186	46	322	response to decreased oxygen levels	0.142857142857143
GO:0010948	0.000531788344336795	1.82910981156595	24.8258291940394	42	294	negative regulation of cell cycle process	0.142857142857143
GO:0071674	0.00417047431137221	1.82163554410818	16.5505527960263	28	196	mononuclear cell migration	0.142857142857143
GO:0003205	0.00882873858534864	1.81899871630295	13.595096939593	23	161	cardiac chamber development	0.142857142857143
GO:0050770	0.0102734958046384	1.81847338037203	13.0040057683064	22	154	regulation of axonogenesis	0.142857142857143
GO:0071326	0.0102734958046384	1.81847338037203	13.0040057683064	22	154	cellular response to monosaccharide stimulus	0.142857142857143
GO:0046328	0.0162546561441303	1.8169014084507	11.2307322544464	19	133	regulation of JNK cascade	0.142857142857143
GO:1903052	0.0162546561441303	1.8169014084507	11.2307322544464	19	133	positive regulation of proteolysis involved in cellular protein catabolic process	0.142857142857143
GO:0035601	0.02592441632197	1.81533546325879	9.45745874058644	16	112	protein deacylation	0.142857142857143
GO:0000041	0.0303590536248973	1.81481481481481	8.86636756929979	15	105	transition metal ion transport	0.142857142857143
GO:0061337	0.0356026196129914	1.81429483088705	8.27527639801314	14	98	cardiac conduction	0.142857142857143
GO:0032370	0.0492139778211622	1.81325685149777	7.09309405543983	12	84	positive regulation of lipid transport	0.142857142857143
GO:0042440	0.0492139778211622	1.81325685149777	7.09309405543983	12	84	pigment metabolic process	0.142857142857143
GO:0050878	9.95844465269372e-05	1.82986852047756	32.0033648453773	54	379	regulation of body fluid levels	0.142480211081794
GO:0007265	0.000238126324496903	1.82590618842219	28.4568178176574	48	337	Ras protein signal transduction	0.142433234421365
GO:0050778	1.82108691624009e-06	1.84351781079424	48.6383592373017	82	576	positive regulation of immune response	0.142361111111111
GO:0098813	0.000764270328956617	1.82034083596091	23.7280884473642	40	281	nuclear chromosome segregation	0.142348754448399
GO:0071216	0.00159058511236591	1.81659748747724	20.7726325909309	35	246	cellular response to biotic stimulus	0.142276422764228
GO:1903039	0.00184273720367874	1.81581345483785	20.1815414196443	34	239	positive regulation of leukocyte cell-cell adhesion	0.142259414225941
GO:0007163	0.00286953532762027	1.81336898395722	18.4082679057843	31	218	establishment or maintenance of cell polarity	0.142201834862385
GO:0008284	5.93229836093498e-10	1.87002497793865	82.0772312129466	138	972	positive regulation of cell population proliferation	0.141975308641975
GO:0019221	1.73306249970823e-05	1.82882234943001	39.8564332639	67	472	cytokine-mediated signaling pathway	0.141949152542373
GO:1903364	0.0110471978951127	1.80469454585791	13.0884473642045	22	155	positive regulation of cellular protein catabolic process	0.141935483870968
GO:0006839	0.00147319054940442	1.80892491315579	21.4481653581157	36	254	mitochondrial transport	0.141732283464567
GO:0140694	0.000153003961953584	1.81673674047775	30.9900656946002	52	367	non-membrane-bounded organelle assembly	0.141689373297003
GO:0071347	0.0279200942621314	1.79651526629558	9.54190033648454	16	113	cellular response to interleukin-1	0.141592920353982
GO:0097191	0.00307944492997972	1.8036170212766	18.4927095016824	31	219	extrinsic apoptotic signaling pathway	0.141552511415525
GO:0002062	0.0327078344685924	1.79476653614585	8.95080916519789	15	106	chondrocyte differentiation	0.141509433962264
GO:1903707	0.0327078344685924	1.79476653614585	8.95080916519789	15	106	negative regulation of hemopoiesis	0.141509433962264
GO:0050776	4.4407985112121e-09	1.85387507580352	75.2374619452011	126	891	regulation of immune response	0.141414141414141
GO:0006165	0.0383724059243407	1.79284507676715	8.35971799391123	14	99	nucleoside diphosphate phosphorylation	0.141414141414141
GO:0031330	0.00136373494696197	1.8017530224525	22.1236981253004	37	262	negative regulation of cellular catabolic process	0.141221374045802
GO:0021537	0.00182961508668559	1.79932766065995	20.9415157827271	35	248	telencephalon development	0.141129032258065
GO:0071322	0.0101947559840928	1.79280212726939	13.7639801313892	23	163	cellular response to carbohydrate stimulus	0.141104294478528
GO:1901987	0.000113524003397436	1.80822949472819	32.9322224002564	55	390	regulation of cell cycle phase transition	0.141025641025641
GO:0043065	6.15711584762732e-06	1.81913994388755	45.5140201890723	76	539	positive regulation of apoptotic process	0.14100185528757
GO:0051592	0.0138228610103407	1.78933293269231	12.5817977888159	21	149	response to calcium ion	0.140939597315436
GO:0022409	0.000941461084735774	1.7976404506335	23.9814132350585	40	284	positive regulation of cell-cell adhesion	0.140845070422535
GO:0003018	0.00146113740190377	1.79367462974002	22.2081397211985	37	263	vascular process in circulatory system	0.140684410646388
GO:0032612	0.0219509400003748	1.78314430291398	10.8085242749559	18	128	interleukin-1 production	0.140625
GO:0032652	0.0219509400003748	1.78314430291398	10.8085242749559	18	128	regulation of interleukin-1 production	0.140625
GO:0021987	0.0300277198229862	1.77807915498468	9.62634193238263	16	114	cerebral cortex development	0.140350877192982
GO:0090100	0.0300277198229862	1.77807915498468	9.62634193238263	16	114	positive regulation of transmembrane receptor protein serine/threonine kinase signaling pathway	0.140350877192982
GO:0010810	0.0035387250026667	1.78442105263158	18.6615926934786	31	221	regulation of cell-substrate adhesion	0.14027149321267
GO:0031532	0.0351864016206224	1.77515408962186	9.03525076109598	15	107	actin cytoskeleton reorganization	0.14018691588785
GO:0050730	0.00156454817242559	1.78566741229372	22.2925813170966	37	264	regulation of peptidyl-tyrosine phosphorylation	0.140151515151515
GO:0001666	0.000696030788070013	1.78743054734602	25.9235699407146	43	307	response to hypoxia	0.140065146579805
GO:0002449	0.000310788587236439	1.78952881170684	29.5545585643326	49	350	lymphocyte mediated immunity	0.14
GO:0099003	0.00552828019676683	1.77885263331287	16.8883191796187	28	200	vesicle-mediated transport in synapse	0.14
GO:0006626	0.0412926065820043	1.77189415413841	8.44415958980933	14	100	protein targeting to mitochondrion	0.14
GO:0046545	0.0412926065820043	1.77189415413841	8.44415958980933	14	100	development of primary female sexual characteristics	0.14
GO:0001935	0.00641941578231701	1.77680606596269	16.297228008332	27	193	endothelial cell proliferation	0.139896373056995
GO:0050731	0.00641941578231701	1.77680606596269	16.297228008332	27	193	positive regulation of peptidyl-tyrosine phosphorylation	0.139896373056995
GO:0031023	0.0172953970978324	1.7727848002375	12.0751482134273	20	143	microtubule organizing center organization	0.13986013986014
GO:0062013	0.0172953970978324	1.7727848002375	12.0751482134273	20	143	positive regulation of small molecule metabolic process	0.13986013986014
GO:0033273	0.0485410068384732	1.76822385204082	7.85306841852267	13	93	response to vitamin	0.139784946236559
GO:0045132	0.0485410068384732	1.76822385204082	7.85306841852267	13	93	meiotic chromosome segregation	0.139784946236559
GO:0097306	0.0485410068384732	1.76822385204082	7.85306841852267	13	93	cellular response to alcohol	0.139784946236559
GO:1901796	0.0485410068384732	1.76822385204082	7.85306841852267	13	93	regulation of signal transduction by p53 class mediator	0.139784946236559
GO:0051272	3.32274436895618e-06	1.80328239348486	50.1583079634674	83	594	positive regulation of cellular component movement	0.13973063973064
GO:0001936	0.00866733106254797	1.77236003071479	15.1150456657587	25	179	regulation of endothelial cell proliferation	0.139664804469274
GO:0045785	6.65422910566864e-05	1.78948418253079	36.9009774074668	61	437	positive regulation of cell adhesion	0.139588100686499
GO:0042063	0.000861477285079598	1.77893683156841	25.4169203653261	42	301	gliogenesis	0.13953488372093
GO:0140014	0.00115386654875084	1.77549149167032	24.2347380227528	40	287	mitotic nuclear division	0.139372822299652
GO:0006898	0.00260276016717654	1.77205651491366	20.6037493991348	34	244	receptor-mediated endocytosis	0.139344262295082
GO:0030278	0.0322505772253999	1.76001549036693	9.71078352828073	16	115	regulation of ossification	0.139130434782609
GO:0043279	0.0322505772253999	1.76001549036693	9.71078352828073	16	115	response to alkaloid	0.139130434782609
GO:0071333	0.0159054833966354	1.76159763313609	12.7506809806121	21	151	cellular response to glucose stimulus	0.139072847682119
GO:0034097	9.66996933058271e-09	1.81619452383163	77.7707098221439	128	921	response to cytokine	0.138979370249729
GO:0009612	0.00470342031975545	1.76327447432458	18.2393847139881	30	216	response to mechanical stimulus	0.138888888888889
GO:0050870	0.00470342031975545	1.76327447432458	18.2393847139881	30	216	positive regulation of T cell activation	0.138888888888889
GO:0014065	0.0185443587287046	1.75838482362423	12.1595898093254	20	144	phosphatidylinositol 3-kinase signaling	0.138888888888889
GO:0033138	0.0377981993017742	1.75596341614139	9.11969235699407	15	108	positive regulation of peptidyl-serine phosphorylation	0.138888888888889
GO:0071222	0.00545749012647978	1.76080326460481	17.6482935427015	29	209	cellular response to lipopolysaccharide	0.138755980861244
GO:0060326	0.000850508425730678	1.76703291886442	26.1768947284089	43	310	cell chemotaxis	0.138709677419355
GO:0098869	0.044366727781603	1.75142486191493	8.52860118570742	14	101	cellular oxidant detoxification	0.138613861386139
GO:0001906	0.00854546428184101	1.75253066571395	15.8750200288415	26	188	cell killing	0.138297872340426
GO:0031347	3.39611421311294e-06	1.78220436280138	52.522672648614	86	622	regulation of defense response	0.138263665594855
GO:0051402	0.00297472593516205	1.75513166079204	20.7726325909309	34	246	neuron apoptotic process	0.138211382113821
GO:0030168	0.0295509368042815	1.74692370795734	10.3863162954655	17	123	platelet activation	0.138211382113821
GO:0071482	0.0295509368042815	1.74692370795734	10.3863162954655	17	123	cellular response to light stimulus	0.138211382113821
GO:0099504	0.00993201709057478	1.74943148111529	15.2839288575549	25	181	synaptic vesicle cycle	0.138121546961326
GO:0018107	0.0345918703528577	1.74231309904153	9.79522512417882	16	116	peptidyl-threonine phosphorylation	0.137931034482759
GO:0022411	9.84822208213669e-05	1.76074676219344	37.4076269828553	61	443	cellular component disassembly	0.137697516930023
GO:0045786	0.000275632148478754	1.75623304737274	32.5100144207659	53	385	negative regulation of cell cycle	0.137662337662338
GO:0045088	0.00537396936479716	1.74431046545125	18.4082679057843	30	218	regulation of innate immune response	0.137614678899083
GO:0043266	0.0405465446512255	1.73718105486264	9.20413395289216	15	109	regulation of potassium ion transport	0.137614678899083
GO:0010942	4.76362058377081e-06	1.77053129797032	52.1849062650216	85	618	positive regulation of cell death	0.137540453074434
GO:0032886	0.00368170263565594	1.74404561285249	20.2659830155424	33	240	regulation of microtubule-based process	0.1375
GO:0043491	0.0062350179693118	1.74124844227937	17.8171767344977	29	211	protein kinase B signaling	0.137440758293839
GO:0031329	1.53175101100179e-07	1.7828561247285	68.819900656946	112	815	regulation of cellular catabolic process	0.137423312883436
GO:0000723	0.0270721177198807	1.73549844580708	11.0618490626502	18	131	telomere maintenance	0.137404580152672
GO:0032271	0.00426743820622691	1.74117148280547	19.6748918442557	32	233	regulation of protein polymerization	0.137339055793991
GO:0050673	0.000121333570808749	1.75422075034399	36.9009774074668	60	437	epithelial cell proliferation	0.137299771167048
GO:1901990	0.0013845278278098	1.74228329809725	25.2480371735299	41	299	regulation of mitotic cell cycle phase transition	0.137123745819398
GO:2001020	0.00573817959254597	1.73497896902152	18.4927095016824	30	219	regulation of response to DNA damage stimulus	0.136986301369863
GO:0002833	0.0143654127855216	1.73047231198265	14.1861881108797	23	168	positive regulation of response to biotic stimulus	0.136904761904762
GO:0032101	1.89350804741491e-08	1.78334537997344	80.2195161031886	130	950	regulation of response to external stimulus	0.136842105263158
GO:0043523	0.00665708715238299	1.73163131654555	17.9016183303958	29	212	regulation of neuron apoptotic process	0.136792452830189
GO:0030335	1.87124530821474e-05	1.75292358803987	46.9495273193399	76	556	positive regulation of cell migration	0.136690647482014
GO:0052548	0.000159155146559186	1.74275241057872	36.4787694279763	59	432	regulation of endopeptidase activity	0.136574074074074
GO:0007017	9.06407965647401e-08	1.77156490317799	73.6330716231373	119	872	microtubule-based process	0.136467889908257
GO:0009894	2.28873168366322e-08	1.77651814268117	80.4728408908829	130	953	regulation of catabolic process	0.136411332633788
GO:0002443	0.000146703753732434	1.74006020969584	37.154302195161	60	440	leukocyte mediated immunity	0.136363636363636
GO:0050864	0.00896974557938932	1.72434464539728	16.7194359878225	27	198	regulation of B cell activation	0.136363636363636
GO:0008360	0.0194830304956757	1.72155870445344	13.0040057683064	21	154	regulation of cell shape	0.136363636363636
GO:0007088	0.043434616038015	1.71879411171607	9.28857554879026	15	110	regulation of mitotic nuclear division	0.136363636363636
GO:0009896	6.44778077391668e-05	1.74067759732691	41.5452651818619	67	492	positive regulation of catabolic process	0.136178861788618
GO:0051051	9.33702896763525e-05	1.73908186692039	39.6875500721038	64	470	negative regulation of transport	0.136170212765957
GO:0030041	0.0104182471381986	1.72036246711488	16.1283448165358	26	191	actin filament polymerization	0.136125654450262
GO:0009152	0.0153429198616873	1.71851864877697	14.2706297067778	23	169	purine ribonucleotide biosynthetic process	0.136094674556213
GO:0018210	0.0338654079614824	1.71437198067633	10.5551994872617	17	125	peptidyl-threonine modification	136
GO:0045087	1.26707779733169e-07	1.76282159945318	73.2953052395449	118	868	innate immune response	0.135944700460829
GO:0048863	0.00824210652753576	1.71828356859142	17.3949687550072	28	206	stem cell differentiation	0.135922330097087
GO:0071219	0.00652866670829871	1.71660911217556	18.6615926934786	30	221	cellular response to molecule of bacterial origin	0.135746606334842
GO:0070997	0.000633770364106388	1.72530879694718	30.4834161192117	49	361	neuron death	0.135734072022161
GO:0007292	0.0265036290615024	1.71108771335753	11.8218234257331	19	140	female gamete generation	0.135714285714286
GO:0007346	0.00013256143220916	1.73050891242573	38.5898093254286	62	457	regulation of mitotic cell cycle	0.135667396061269
GO:0090068	0.00517695106688659	1.7152622185091	19.92821663195	32	236	positive regulation of cell cycle process	0.135593220338983
GO:0030324	0.0140747457633135	1.71158713967282	14.9461624739625	24	177	lung development	0.135593220338983
GO:0051302	0.0140747457633135	1.71158713967282	14.9461624739625	24	177	regulation of cell division	0.135593220338983
GO:0050900	0.000583704181248979	1.72229513768738	31.1589488863964	50	369	leukocyte migration	0.13550135501355
GO:0046434	0.020805063962928	1.70861079219288	13.0884473642045	21	155	organophosphate catabolic process	0.135483870967742
GO:0070925	1.76732976172792e-07	1.7540242938969	72.9575388559526	117	864	organelle assembly	0.135416666666667
GO:0043410	9.73713880178621e-05	1.72816066376323	40.5319660310848	65	480	positive regulation of MAPK cascade	0.135416666666667
GO:0071356	0.0060003510864705	1.71151515151515	19.3371254606634	31	229	cellular response to tumor necrosis factor	0.135371179039301
GO:0010595	0.0309536834749579	1.70511558040557	11.2307322544464	18	133	positive regulation of endothelial cell migration	0.135338345864662
GO:0044839	0.0242531593387423	1.70303491351698	12.4973561929178	20	148	cell cycle G2/M phase transition	0.135135135135135
GO:0051384	0.0242531593387423	1.70303491351698	12.4973561929178	20	148	response to glucocorticoid	0.135135135135135
GO:0030162	1.43095489871879e-06	1.73983353523539	63.1623137317738	101	748	regulation of proteolysis	0.135026737967914
GO:0071345	4.92433260697477e-07	1.743465872109	68.819900656946	110	815	cellular response to cytokine stimulus	0.134969325153374
GO:0072331	0.0190565129619328	1.70149987034788	13.7639801313892	22	163	signal transduction by p53 class mediator	0.134969325153374
GO:0031929	0.0361882480937343	1.69854407658556	10.6396410831598	17	126	TOR signaling	0.134920634920635
GO:0032874	0.0361882480937343	1.69854407658556	10.6396410831598	17	126	positive regulation of stress-activated MAPK cascade	0.134920634920635
GO:0031669	0.00806791155463172	1.70340039906884	18.15494311809	29	215	cellular response to nutrient levels	0.134883720930233
GO:0008015	6.99573124158781e-05	1.72022017987029	43.2340970998237	69	512	blood circulation	0.134765625
GO:0050727	0.000526193365401758	1.7114547882652	32.594456016664	52	386	regulation of inflammatory response	0.134715025906736
GO:0000226	1.55152321984684e-05	1.72465388057567	51.4249319019388	82	609	microtubule cytoskeleton organization	0.134646962233169
GO:0043408	5.39636312235279e-06	1.72854586129754	57.082518827111	91	676	regulation of MAPK cascade	0.134615384615385
GO:0007010	2.55460659841827e-11	1.78073606261571	119.822624579394	191	1419	cytoskeleton organization	0.134601832276251
GO:0051259	0.00586967962671184	1.69840861940369	20.0970998237462	32	238	protein complex oligomerization	0.134453781512605
GO:0030282	0.0423569874780029	1.6912683395887	10.0485499118731	16	119	bone mineralization	0.134453781512605
GO:0048608	0.000307660729182927	1.70956789461263	35.8032366607915	57	424	reproductive structure development	0.134433962264151
GO:0097305	0.00465562098999242	1.69832906819208	21.3637237622176	34	253	response to alcohol	0.134387351778656
GO:0050708	0.00369583698476823	1.69835955808504	22.630347700689	36	268	regulation of protein secretion	0.134328358208955
GO:0006897	1.20706778236491e-05	1.72051260783013	53.451530203493	85	633	endocytosis	0.134281200631912
GO:0006914	7.26373230425236e-05	1.71061185524443	44.0785130588047	70	522	autophagy	0.134099616858238
GO:0061919	7.26373230425236e-05	1.71061185524443	44.0785130588047	70	522	process utilizing autophagic mechanism	0.134099616858238
GO:1901991	0.0159898128107901	1.68930325066816	15.1150456657587	24	179	negative regulation of mitotic cell cycle phase transition	0.134078212290503
GO:0050777	0.0126113079549949	1.68934313275149	16.3816696042301	26	194	negative regulation of immune response	0.134020618556701
GO:0003013	2.33328889497744e-05	1.71387997943344	50.4116327511617	80	597	circulatory system process	0.134003350083752
GO:1902905	0.00996343646908996	1.68950489695581	17.6482935427015	28	209	positive regulation of supramolecular fiber organization	0.133971291866029
GO:0001678	0.0185942088561193	1.6836203702906	14.523954494472	23	172	cellular glucose homeostasis	0.133720930232558
GO:0006511	1.44405743892211e-05	1.71083567068141	53.7048549911873	85	636	ubiquitin-dependent protein catabolic process	0.133647798742138
GO:0070374	0.00913888128664084	1.68508033559991	18.3238263098862	29	217	positive regulation of ERK1 and ERK2 cascade	0.133640552995392
GO:0006887	0.00114852587482979	1.69136512279052	29.7234417561288	47	352	exocytosis	0.133522727272727
GO:0051271	0.000914530426677489	1.69215232277452	30.9900656946002	49	367	negative regulation of cellular component movement	0.133514986376022
GO:0061458	0.000368443457236195	1.69540327729304	36.0565614484858	57	427	reproductive system development	0.133489461358314
GO:0007264	0.00011850222171037	1.69964469548581	42.3896811408428	67	502	small GTPase mediated signal transduction	0.133466135458167
GO:0050851	0.00663837305112101	1.68187912797338	20.2659830155424	32	240	antigen receptor-mediated signaling pathway	0.133333333333333
GO:0008037	0.00838265602330118	1.68099985121262	18.999359077071	30	225	cell recognition	0.133333333333333
GO:0016485	0.00838265602330118	1.68099985121262	18.999359077071	30	225	protein processing	0.133333333333333
GO:0034284	0.00838265602330118	1.68099985121262	18.999359077071	30	225	response to monosaccharide	0.133333333333333
GO:0050796	0.0216352886569811	1.67750530418908	13.9328633231854	22	165	regulation of insulin secretion	0.133333333333333
GO:0061982	0.0352342755546065	1.67577144544515	11.3996154462426	18	135	meiosis I cell cycle process	0.133333333333333
GO:0072655	0.0452021065817647	1.67490783976407	10.1329915077712	16	120	establishment of protein localization to mitochondrion	0.133333333333333
GO:0019941	1.49360066569261e-05	1.70335881509795	54.5492709501682	86	646	modification-dependent protein catabolic process	0.13312693498452
GO:0008154	0.00971656618470157	1.67606570119457	18.4082679057843	29	218	actin polymerization or depolymerization	0.13302752293578
GO:0040013	0.000710757051165177	1.68571048229799	33.0166639961545	52	391	negative regulation of locomotion	0.132992327365729
GO:0034763	0.0321518036929711	1.66939614224939	12.0751482134273	19	143	negative regulation of transmembrane transport	0.132867132867133
GO:0017015	0.0411789056455284	1.66774383078731	10.8085242749559	17	128	regulation of transforming growth factor beta receptor signaling pathway	0.1328125
GO:0070304	0.0411789056455284	1.66774383078731	10.8085242749559	17	128	positive regulation of stress-activated protein kinase signaling cascade	0.1328125
GO:0071241	0.00890841071216751	1.67232463585047	19.0838006729691	30	226	cellular response to inorganic substance	0.132743362831858
GO:0030100	0.0112661478579234	1.67084331753454	17.8171767344977	28	211	regulation of endocytosis	0.132701421800948
GO:0051270	1.50080671950193e-08	1.72566943302209	94.2368210222721	148	1116	regulation of cellular component movement	0.132616487455197
GO:0030323	0.018105544374252	1.66758710405852	15.2839288575549	24	181	respiratory tube development	0.132596685082873
GO:0006936	0.0014936558371073	1.67668250240783	29.3012337766384	46	347	muscle contraction	0.132564841498559
GO:0040017	3.83590811826204e-05	1.69132967777328	50.3271911552636	79	596	positive regulation of locomotion	0.13255033557047
GO:0043632	1.63475407465475e-05	1.69304586768125	55.4781285050473	87	657	modification-dependent macromolecule catabolic process	0.132420091324201
GO:0009746	0.0103237936119253	1.6671459576777	18.4927095016824	29	219	response to hexose	0.132420091324201
GO:0052547	0.000296078059550921	1.67970723684211	38.927575709021	61	461	regulation of peptidase activity	0.132321041214751
GO:0097190	5.10283983171209e-05	1.68665604592374	49.1450088126903	77	582	apoptotic signaling pathway	0.132302405498282
GO:2000147	5.10283983171209e-05	1.68665604592374	49.1450088126903	77	582	positive regulation of cell motility	0.132302405498282
GO:0043244	0.0481801294376726	1.65885896850753	10.2174331036693	16	121	regulation of protein-containing complex disassembly	0.132231404958678
GO:0045931	0.0481801294376726	1.65885896850753	10.2174331036693	16	121	positive regulation of mitotic cell cycle	0.132231404958678
GO:0098542	2.6268642619302e-08	1.71721021277592	92.6324307002083	145	1097	defense response to other organism	0.132178669097539
GO:0006469	0.0119675266609404	1.66166466026485	17.9016183303958	28	212	negative regulation of protein kinase activity	0.132075471698113
GO:0032200	0.0267978223881388	1.65869565217391	13.4262137477968	21	159	telomere organization	0.132075471698113
GO:0080134	1.2794037018759e-09	1.7281176521528	110.027399455216	172	1303	regulation of response to stress	0.132003069838833
GO:0071248	0.0151614607925869	1.65941219608507	16.6349943919244	26	197	cellular response to metal ion	0.131979695431472
GO:0106106	0.0342201353275396	1.65594366197183	12.1595898093254	19	144	cold-induced thermogenesis	0.131944444444444
GO:0120161	0.0342201353275396	1.65594366197183	12.1595898093254	19	144	regulation of cold-induced thermogenesis	0.131944444444444
GO:0051260	0.0192428381069609	1.65693519670252	15.368370453453	24	182	protein homooligomerization	0.131868131868132
GO:0061138	0.0192428381069609	1.65693519670252	15.368370453453	24	182	morphogenesis of a branching epithelium	0.131868131868132
GO:0044257	2.40504837017369e-06	1.69303482103832	67.891043102067	106	804	cellular protein catabolic process	0.131840796019901
GO:0080135	1.94328318117705e-05	1.68387686873147	55.7314532927415	87	660	regulation of cellular response to stress	0.131818181818182
GO:0002064	0.0109616419834219	1.65831961461651	18.5771510975805	29	220	epithelial cell development	0.131818181818182
GO:0007127	0.0438519625393479	1.65275621118012	10.892965870854	17	129	meiosis I	0.131782945736434
GO:0016358	0.00794745933853703	1.65767243199251	20.5193078032367	32	243	dendrite development	0.131687242798354
GO:0009314	0.000383154570356762	1.66816089893013	38.5053677295305	60	456	response to radiation	0.131578947368421
GO:0031056	0.0312140841511243	1.65103954341623	12.8351225765102	20	152	regulation of histone modification	0.131578947368421
GO:0030163	2.98719294845392e-07	1.69761102299762	80.8950488703733	126	958	protein catabolic process	0.131524008350731
GO:0000086	0.0399343969391906	1.64741366796239	11.5684986380388	18	137	G2/M transition of mitotic cell cycle	0.131386861313869
GO:0010977	0.0399343969391906	1.64741366796239	11.5684986380388	18	137	negative regulation of neuron projection development	0.131386861313869
GO:0050714	0.0399343969391906	1.64741366796239	11.5684986380388	18	137	positive regulation of protein secretion	0.131386861313869
GO:0060048	0.0399343969391906	1.64741366796239	11.5684986380388	18	137	cardiac muscle contraction	0.131386861313869
GO:0010038	0.00130031623734919	1.66022386616381	31.4967152699888	49	373	response to metal ion	0.131367292225201
GO:0048762	0.0091993016652619	1.65239024390244	19.92821663195	31	236	mesenchymal cell differentiation	0.13135593220339
GO:0002252	2.51127562382858e-05	1.67550652144524	55.3092453132511	86	655	immune effector process	0.131297709923664
GO:0071496	0.00281228073951378	1.65548964337302	27.0213106873898	42	320	cellular response to external stimulus	0.13125
GO:0043271	0.0284827630882135	1.64666574432761	13.5106553436949	21	160	negative regulation of ion transport	0.13125
GO:0043067	1.11670288666588e-10	1.72883236107663	126.746835443038	197	1501	regulation of programmed cell death	0.13124583610926
GO:0008406	0.0116312059572686	1.64958521262887	18.6615926934786	29	221	gonad development	0.131221719457014
GO:1903532	0.00485721479194033	1.65271492016496	23.8125300432623	37	282	positive regulation of secretion by cell	0.131205673758865
GO:0031331	0.000638898177519193	1.65998144138571	36.0565614484858	56	427	positive regulation of cellular catabolic process	0.131147540983607
GO:1903047	1.03600629088406e-05	1.67557520989553	61.2201570261176	95	725	mitotic cell cycle process	0.131034482758621
GO:0051129	1.78241501556106e-05	1.67285117741626	58.0113763819901	90	687	negative regulation of cellular component organization	0.131004366812227
GO:0099173	0.0259995653180775	1.64274605252752	14.1861881108797	22	168	postsynapse organization	0.130952380952381
GO:1901653	0.00172978621440969	1.65273041821282	30.3145329274155	47	359	cellular response to peptide	0.13091922005571
GO:2000146	0.00172978621440969	1.65273041821282	30.3145329274155	47	359	negative regulation of cell motility	0.13091922005571
GO:0010720	0.00408602040225816	1.64865616032931	25.1635955776318	39	298	positive regulation of cell development	0.130872483221477
GO:0031647	0.00408602040225816	1.64865616032931	25.1635955776318	39	298	regulation of protein stability	0.130872483221477
GO:0051603	7.99905603539778e-06	1.67398255497792	63.2467553276718	98	749	proteolysis involved in cellular protein catabolic process	0.130841121495327
GO:0044242	0.0134762887674609	1.64360343144382	18.070501522192	28	214	cellular lipid catabolic process	0.130841121495327
GO:0030336	0.00217382778531456	1.65032530309365	29.0479089889441	45	344	negative regulation of cell migration	0.130813953488372
GO:0009615	0.00158783267237438	1.65124625020704	30.9900656946002	48	367	response to virus	0.130790190735695
GO:1903706	0.00158783267237438	1.65124625020704	30.9900656946002	48	367	regulation of hemopoiesis	0.130790190735695
GO:0051656	0.00116059076213677	1.65221238938053	32.9322224002564	51	390	establishment of organelle localization	0.130769230769231
GO:0042476	0.0466468304710176	1.63803385917661	10.9774074667521	17	130	odontogenesis	0.130769230769231
GO:0043467	0.0466468304710176	1.63803385917661	10.9774074667521	17	130	regulation of generation of precursor metabolites and energy	0.130769230769231
GO:0070663	0.00893372584298143	1.64191345620528	20.6881909950328	32	245	regulation of leukocyte proliferation	0.130612244897959
GO:0016236	0.00471862307801558	1.6439972437042	24.5725044063451	38	291	macroautophagy	0.130584192439863
GO:0007548	0.00594521874736564	1.64097087378641	23.3058804678737	36	276	sex differentiation	0.130434782608696
GO:0034612	0.00818349556190412	1.63972868217054	21.3637237622176	33	253	response to tumor necrosis factor	0.130434782608696
GO:0040012	9.9039232146562e-08	1.68581075097414	91.3658067617369	141	1082	regulation of locomotion	0.130314232902033
GO:0032872	0.0198124750741214	1.63314117266752	16.2127864124339	25	192	regulation of stress-activated MAPK cascade	0.130208333333333
GO:0021543	0.0275944374271971	1.63147491196607	14.2706297067778	22	169	pallium development	0.130177514792899
GO:0006954	5.31813558913053e-06	1.66630589908574	67.4688351225765	104	799	inflammatory response	0.130162703379224
GO:0050920	0.0130699352066115	1.63238654479753	18.8304758852748	29	223	regulation of chemotaxis	0.130044843049327
GO:0045216	0.0181067833402511	1.630513360683	16.8883191796187	26	200	cell-cell junction organization	0.13
GO:0072522	0.0181067833402511	1.630513360683	16.8883191796187	26	200	purine-containing compound biosynthetic process	0.13
GO:0046034	0.00629405818120561	1.63406518148491	23.3903220637718	36	277	ATP metabolic process	0.129963898916967
GO:0030334	4.64877417120168e-07	1.67398397553527	83.1749719596219	128	985	regulation of cell migration	0.12994923857868
GO:0051240	7.26543932220358e-10	1.70260356588343	122.186989264541	188	1447	positive regulation of multicellular organismal process	0.12992398064962
GO:0050853	0.0495658665830292	1.62356979405034	11.0618490626502	17	131	B cell receptor signaling pathway	0.129770992366412
GO:1903844	0.0495658665830292	1.62356979405034	11.0618490626502	17	131	regulation of cellular response to transforming growth factor beta stimulus	0.129770992366412
GO:0051403	0.0109453198739586	1.62826923076923	20.1815414196443	31	239	stress-activated MAPK cascade	0.129707112970711
GO:0031098	0.0100187678088243	1.62644767066525	20.857074186829	32	247	stress-activated protein kinase signaling cascade	0.129554655870445
GO:0045860	0.0015822741103477	1.63350284594569	32.594456016664	50	386	positive regulation of protein kinase activity	0.129533678756477
GO:0051783	0.0450734308759011	1.61999333766914	11.737381829835	18	139	regulation of nuclear division	0.129496402877698
GO:0032984	0.0138413627987629	1.62391950832672	18.9149174811729	29	224	protein-containing complex disassembly	0.129464285714286
GO:2001234	0.0138413627987629	1.62391950832672	18.9149174811729	29	224	negative regulation of apoptotic signaling pathway	0.129464285714286
GO:0042981	7.96733014288517e-10	1.6955410874063	123.960262778401	190	1468	regulation of apoptotic process	0.129427792915531
GO:0051924	0.00917205275654167	1.6247642991829	21.5326069540138	33	255	regulation of calcium ion transport	0.129411764705882
GO:0007259	0.0292625850046731	1.6203560841149	14.3550713026759	22	170	receptor signaling pathway via JAK-STAT	0.129411764705882
GO:0030900	0.00182270310546358	1.62945644433895	32.0033648453773	49	379	forebrain development	0.129287598944591
GO:0030036	2.46751721737629e-05	1.64650880651661	60.1224162794424	92	712	actin cytoskeleton organization	0.129213483146067
GO:0012501	8.53539196751019e-13	1.723765519287	165.421086364365	253	1959	programmed cell death	0.129147524247065
GO:0030029	8.51324526716062e-06	1.64916716153464	67.3843935266784	103	798	actin filament-based process	0.129072681704261
GO:0031345	0.0243607926447838	1.6156426175694	15.7061368370453	24	186	negative regulation of cell projection organization	0.129032258064516
GO:0010001	0.0146490285971731	1.61553887018725	18.999359077071	29	225	glial cell differentiation	0.128888888888889
GO:0050670	0.0146490285971731	1.61553887018725	18.999359077071	29	225	regulation of lymphocyte proliferation	0.128888888888889
GO:0048870	5.0996541463836e-11	1.69804082075458	144.395128985739	220	1710	cell motility	0.128654970760234
GO:0051674	5.0996541463836e-11	1.69804082075458	144.395128985739	220	1710	localization of cell	0.128654970760234
GO:0042129	0.03100591094099	1.60938650227516	14.4395128985739	22	171	regulation of T cell proliferation	0.128654970760234
GO:0051640	0.000346831039532552	1.62666216633011	43.9940714629066	67	521	organelle localization	0.128598848368522
GO:0042742	0.00303795278794205	1.61728355532787	29.5545585643326	45	350	defense response to bacterium	0.128571428571429
GO:1901214	0.00454596825334913	1.61502382509577	26.9368690914917	41	319	regulation of neuron death	0.128526645768025
GO:0045926	0.0112096593033508	1.61126696872964	21.0259573786252	32	249	negative regulation of growth	0.1285140562249
GO:0008219	1.93483815722984e-13	1.72249291878826	178.087325749079	271	2109	cell death	0.128496917970602
GO:2000145	4.70216845803589e-07	1.65375500922587	88.0725845217113	134	1043	regulation of cell motility	0.128475551294343
GO:0001667	0.000647632356416596	1.62154843630816	40.1097580515943	61	475	ameboidal-type cell migration	0.128421052631579
GO:0070507	0.043483403951598	1.60421939671858	12.4973561929178	19	148	regulation of microtubule cytoskeleton organization	0.128378378378378
GO:0030073	0.0235361633835472	1.60403750189022	16.4661112001282	25	195	insulin secretion	0.128205128205128
GO:0070302	0.0235361633835472	1.60403750189022	16.4661112001282	25	195	regulation of stress-activated protein kinase signaling cascade	0.128205128205128
GO:0010959	0.00165538811507546	1.61284100608573	34.2832879346259	52	406	regulation of metal ion transport	0.12807881773399
GO:0048584	2.58379326681514e-13	1.71551990126504	179.35394968755	272	2124	positive regulation of response to stimulus	0.128060263653484
GO:0000278	4.63283860621978e-06	1.63667858027531	74.5619291780163	113	883	mitotic cell cycle	0.12797281993205
GO:0045859	0.000103589656182864	1.6229347826087	53.451530203493	81	633	regulation of protein kinase activity	0.127962085308057
GO:0042593	0.010837809094699	1.6028165374677	21.7859317417081	33	258	glucose homeostasis	0.127906976744186
GO:0002221	0.0328262939134376	1.59856318152662	14.523954494472	22	172	pattern recognition receptor signaling pathway	0.127906976744186
GO:0030833	0.0328262939134376	1.59856318152662	14.523954494472	22	172	regulation of actin filament polymerization	0.127906976744186
GO:0030097	9.52117086529514e-06	1.63200787678458	70.0020829995193	106	829	hemopoiesis	0.127864897466827
GO:0031401	1.66268376615353e-06	1.63935415723555	81.9083480211505	124	970	positive regulation of protein modification process	0.127835051546392
GO:0006955	2.13135707114712e-12	1.70225464190981	168.460983816696	255	1995	immune response	0.12781954887218
GO:0032944	0.0163777312645355	1.5990315526398	19.1682422688672	29	227	regulation of mononuclear cell proliferation	0.127753303964758
GO:0045137	0.0163777312645355	1.5990315526398	19.1682422688672	29	227	development of primary sexual characteristics	0.127753303964758
GO:0000165	1.95121742710523e-05	1.62715305560214	65.4422368210223	99	775	MAPK cascade	0.127741935483871
GO:0032880	8.42146860845082e-06	1.62972529928965	71.4375901297869	108	846	regulation of protein localization	0.127659574468085
GO:0001763	0.0248909527119693	1.59456320750462	16.5505527960263	25	196	morphogenesis of a branching structure	0.127551020408163
GO:0032368	0.0460576327042108	1.59178567910962	12.5817977888159	19	149	regulation of lipid transport	0.12751677852349
GO:0010941	3.91976451500553e-10	1.67246242612049	138.484217272873	209	1640	regulation of cell death	0.127439024390244
GO:0044770	0.000493160501423821	1.60860422325418	43.7407466752123	66	518	cell cycle phase transition	0.127413127413127
GO:0033500	0.0114452180366112	1.59563010221582	21.8703733376062	33	259	carbohydrate homeostasis	0.127413127413127
GO:0001837	0.041894314499825	1.59031502359053	13.2573305560006	20	157	epithelial to mesenchymal transition	0.127388535031847
GO:0009749	0.0207383504433721	1.59253887091725	17.9016183303958	27	212	response to glucose	0.127358490566038
GO:0010564	0.000101971260898796	1.61382018438175	55.0559205255568	83	652	regulation of cell cycle process	0.127300613496933
GO:0051347	0.000348933713874475	1.60812375909993	46.4428777439513	70	550	positive regulation of transferase activity	0.127272727272727
GO:0022407	0.00119358967267498	1.60233703203979	37.8298349623458	57	448	regulation of cell-cell adhesion	0.127232142857143
GO:0006928	6.54172247921735e-13	1.69967249445949	179.945040858837	271	2131	movement of cell or subcellular component	0.127170342562177
GO:0097696	0.0316406537400334	1.58687704132205	15.2839288575549	23	181	receptor signaling pathway via STAT	0.12707182320442
GO:0097435	3.91815021362344e-05	1.61422108219637	62.486780964589	94	740	supramolecular fiber organization	0.127027027027027
GO:1901652	0.000650936036391304	1.60143824534068	42.558564332639	64	504	response to peptide	0.126984126984127
GO:0090257	0.0132104717461932	1.58901343975585	21.2792821663195	32	252	regulation of muscle system process	0.126984126984127
GO:0006952	2.37400441984942e-10	1.66874847672435	144.310687389841	217	1709	defense response	0.126974839087185
GO:0006974	2.12591486498418e-05	1.61495916780089	67.2155103348822	101	796	cellular response to DNA damage stimulus	0.126884422110553
GO:0044419	7.66073513959336e-10	1.66037470066207	137.893126101586	207	1633	biological process involved in interspecies interaction between organisms	0.126760563380282
GO:0022610	4.25669752552787e-09	1.65215213593443	126.577952251242	190	1499	biological adhesion	0.126751167444963
GO:0040011	3.2351073850714e-11	1.67511577647422	158.581317096619	238	1878	locomotion	0.126730564430245
GO:0048534	9.65078720283646e-06	1.61633265113209	73.2953052395449	110	868	hematopoietic or lymphoid organ development	0.126728110599078
GO:0002683	0.00157622301208821	1.59411882687766	36.6476526197725	55	434	negative regulation of immune system process	0.126728110599078
GO:0043069	6.21123415121791e-06	1.61726756458714	76.6729690754687	115	908	negative regulation of programmed cell death	0.126651982378855
GO:0009743	0.0139383597004794	1.58172985636624	21.3637237622176	32	253	response to carbohydrate	0.126482213438735
GO:0016477	3.75605502020773e-09	1.64908139859172	128.85787534049	193	1526	cell migration	0.126474442988204
GO:1901701	1.86724027266683e-07	1.63045681848898	102.174331036693	153	1210	cellular response to oxygen-containing compound	0.126446280991736
GO:0051321	0.0127434881847489	1.58144634842921	22.0392565294023	33	261	meiotic cell cycle	0.126436781609195
GO:0043066	8.96665826585423e-06	1.61231866850307	74.8152539657106	112	886	negative regulation of apoptotic process	0.126410835214447
GO:0009260	0.0334340484542516	1.57680383655872	15.368370453453	23	182	ribonucleotide biosynthetic process	0.126373626373626
GO:0048017	0.0334340484542516	1.57680383655872	15.368370453453	23	182	inositol lipid-mediated signaling	0.126373626373626
GO:0046390	0.0304693171418151	1.57634004224992	16.0439032206377	24	190	ribose phosphate biosynthetic process	0.126315789473684
GO:0031099	0.0277802249718735	1.57594320697802	16.7194359878225	25	198	regeneration	0.126262626262626
GO:0042886	0.00816552642200207	1.58055144168808	25.4169203653261	38	301	amide transport	0.12624584717608
GO:0006959	0.00684181722388454	1.58038874845674	26.7679858996956	40	317	humoral immune response	0.126182965299685
GO:0030595	0.0192719161227504	1.57488652100323	19.4215670565615	29	230	leukocyte chemotaxis	0.126086956521739
GO:0051130	1.59988702329444e-06	1.61555849709806	88.4103509053036	132	1047	positive regulation of cellular component organization	0.126074498567335
GO:0006915	4.51113469634363e-11	1.66473068318706	160.77679858997	240	1904	apoptotic process	0.126050420168067
GO:0031668	0.0160830534969879	1.57460465116279	20.7726325909309	31	246	cellular response to extracellular stimulus	0.126016260162602
GO:0007155	8.20108373948736e-09	1.63919069492951	125.986861079955	188	1492	cell adhesion	0.126005361930295
GO:0007169	0.000206817400186716	1.59267691739481	52.9448806281045	79	627	transmembrane receptor protein tyrosine kinase signaling pathway	0.125996810207337
GO:1902533	4.31373335815896e-06	1.60870159810904	81.8239064252524	122	969	positive regulation of intracellular signal transduction	0.125902992776058
GO:0051604	0.00940225007415944	1.57442642285438	24.8258291940394	37	294	protein maturation	0.125850340136054
GO:0009967	9.98214901584309e-09	1.63608967498451	125.480211504567	187	1486	positive regulation of signal transduction	0.125841184387618
GO:0051047	0.00787382279511455	1.57453300213936	26.1768947284089	39	310	positive regulation of secretion	0.125806451612903
GO:0031960	0.0425981201171962	1.56707060063224	14.1017465149816	21	167	response to corticosteroid	0.125748502994012
GO:0001933	0.00553154645463679	1.57492682587385	28.8790257971479	43	342	negative regulation of protein phosphorylation	0.125730994152047
GO:0003341	0.0387681290237461	1.56694210718283	14.7772792821663	22	175	cilium movement	0.125714285714286
GO:0022900	0.0387681290237461	1.56694210718283	14.7772792821663	22	175	electron transport chain	0.125714285714286
GO:0006164	0.0321636496490757	1.56680857937305	16.1283448165358	24	191	purine nucleotide biosynthetic process	0.12565445026178
GO:0042098	0.0293177988923262	1.56679372396064	16.8038775837206	25	199	T cell proliferation	0.125628140703518
GO:0002694	0.000296892318999013	1.58587694452644	51.0871655183464	76	605	regulation of leukocyte activation	0.125619834710744
GO:0043434	0.00251448584216654	1.57644652735873	34.9588207018106	52	414	response to peptide hormone	0.1256038647343
GO:0009410	0.0014908612320858	1.57779395799068	39.0120173049191	58	462	response to xenobiotic stimulus	0.125541125541126
GO:1901565	1.13951333938888e-07	1.61850358533492	110.449607434706	164	1308	organonitrogen compound catabolic process	0.125382262996942
GO:0051726	2.83054495406053e-06	1.60331955922865	86.890402179138	129	1029	regulation of cell cycle	0.12536443148688
GO:0045861	0.00533208333254489	1.56983336123715	29.6390001602307	44	351	negative regulation of proteolysis	0.125356125356125
GO:0001934	8.46223347263423e-05	1.58763092532896	61.3045986220157	91	726	positive regulation of protein phosphorylation	0.12534435261708
GO:0032535	0.00375316822186091	1.57088529952975	32.3411312289697	48	383	regulation of cellular component size	0.12532637075718
GO:0000280	0.00203618499025839	1.57289277522936	37.0698605992629	55	439	nuclear division	0.125284738041002
GO:0030031	0.000657435004942818	1.57700768775872	45.8517865726646	68	543	cell projection assembly	0.125230202578269
GO:0048285	0.00126979156331357	1.57095864661654	41.2074987982695	61	488	organelle fission	125
GO:0072521	0.002781991251696	1.56759786975614	35.1277038936068	52	416	purine-containing compound metabolic process	125
GO:1903522	0.016318362828616	1.56026929816471	21.6170485499119	32	256	regulation of blood circulation	125
GO:0007051	0.0372480326201992	1.55703282596736	15.5372536452492	23	184	spindle organization	125
GO:0055001	0.0372480326201992	1.55703282596736	15.5372536452492	23	184	muscle cell development	125
GO:0010634	0.0409149099664707	1.55667552460368	14.8617208780644	22	176	positive regulation of epithelial cell migration	125
GO:0002376	1.15424793674045e-15	1.70314693634741	237.36532606954	351	2811	immune system process	0.124866595517609
GO:0042127	1.07101740011658e-09	1.63389815312892	146.759493670886	217	1738	regulation of cell population proliferation	0.124856156501726
GO:1901699	0.000151832294638249	1.57778997986655	58.1802595737863	86	689	cellular response to nitrogen compound	0.124818577648766
GO:0120031	0.000864019542633848	1.56935183799157	44.6696042300913	66	529	plasma membrane bounded cell projection assembly	0.12476370510397
GO:0060271	0.00703934687638037	1.55851587537582	28.4568178176574	42	337	cilium assembly	0.124629080118694
GO:0071407	0.000494055598604044	1.56917104875363	49.4827751962826	73	586	cellular response to organic cyclic compound	0.12457337883959
GO:0030522	0.0156989604442959	1.55381248329324	22.3770229129947	33	265	intracellular receptor signaling pathway	0.124528301886792
GO:0051223	0.00108014301829263	1.56491320588882	43.4029802916199	64	514	regulation of protein transport	0.124513618677043
GO:0060548	5.71516539105704e-06	1.58840199902487	84.7793622816856	125	1004	negative regulation of cell death	0.124501992031873
GO:0044843	0.0205930775800367	1.55206394895817	20.3504246114405	30	241	cell cycle G1/S phase transition	0.12448132780083
GO:0014070	1.0629286731857e-05	1.58513699363414	80.0506329113924	118	948	response to organic cyclic compound	0.124472573839662
GO:0002520	1.45488374027427e-05	1.58167854075085	78.1084762057363	115	925	immune system development	0.124324324324324
GO:0071375	0.0126176850979601	1.54923935478939	24.488062810447	36	290	cellular response to peptide hormone stimulus	0.124137931034483
GO:0007159	0.00546617657066405	1.55065296918066	31.3278320781926	46	371	leukocyte cell-cell adhesion	0.123989218328841
GO:0034330	0.000193777407759831	1.56434166519979	58.6024675532767	86	694	cell junction organization	0.123919308357349
GO:0048545	0.00777924529529698	1.54783704491307	28.6257010094536	42	339	response to steroid hormone	0.123893805309735
GO:0051495	0.0260186500407308	1.54289839801752	19.0838006729691	28	226	positive regulation of cytoskeleton organization	0.123893805309735
GO:0051247	5.53229053709795e-08	1.6021328125	123.369171607114	181	1461	positive regulation of protein metabolic process	0.123887748117728
GO:0050803	0.0285228797898176	1.54196567547353	18.4082679057843	27	218	regulation of synapse structure or activity	0.123853211009174
GO:0043254	0.00310780465927988	1.55087434554974	36.1410030443839	53	428	regulation of protein-containing complex assembly	0.123831775700935
GO:0007005	0.00136436307708692	1.55362555167585	42.9807723121295	63	509	mitochondrion organization	0.1237721021611
GO:0001932	3.01288572510285e-06	1.58123511086678	92.8013138920045	136	1099	regulation of protein phosphorylation	0.123748862602366
GO:0033043	3.01288572510285e-06	1.58123511086678	92.8013138920045	136	1099	regulation of organelle organization	0.123748862602366
GO:1901654	0.0376736821878488	1.53888699988666	16.3816696042301	24	194	response to ketone	0.123711340206186
GO:0006950	3.56463734296118e-21	1.75780402170444	325.100144207659	476	3850	response to stress	0.123636363636364
GO:0048015	0.045467989513225	1.53653722800612	15.0306040698606	22	178	phosphatidylinositol-mediated signaling	0.123595505617978
GO:0140352	4.28935665203977e-05	1.56412451887366	72.5353308764621	106	859	export from cell	0.123399301513388
GO:0002440	0.0116597625110824	1.53893569525455	26.0080115366127	38	308	production of molecular mediator of immune response	0.123376623376623
GO:0090130	0.00658478365344733	1.54010009765625	30.821182502804	45	365	tissue migration	0.123287671232877
GO:0050865	0.000377134462000968	1.55238042827921	54.8025957378625	80	649	regulation of cell activation	0.12326656394453
GO:0010631	0.00719206887020528	1.53919194480763	30.1456497356193	44	357	epithelial cell migration	0.123249299719888
GO:0060541	0.0361231254862895	1.53122382369082	17.1416439673129	25	203	respiratory system development	0.123152709359606
GO:0051348	0.0182586305737783	1.53370443674748	22.630347700689	33	268	negative regulation of transferase activity	0.123134328358209
GO:1901698	2.80740674397811e-06	1.57328334761397	96.010094536132	140	1137	response to nitrogen compound	0.123131046613896
GO:0033993	3.18798213046637e-05	1.56089424391754	76.1663195000801	111	902	response to lipid	0.123059866962306
GO:0010951	0.0218845481356258	1.53131221719457	21.2792821663195	31	252	negative regulation of endopeptidase activity	0.123015873015873
GO:0022604	0.0122467122741625	1.53316608992402	26.0924531325108	38	309	regulation of cell morphogenesis	0.122977346278317
GO:0006941	0.0478775454497607	1.52666048381496	15.1150456657587	22	179	striated muscle contraction	0.122905027932961
GO:0000209	0.0262629436282217	1.52869602569849	19.92821663195	29	236	protein polyubiquitination	0.122881355932203
GO:0048738	0.0262629436282217	1.52869602569849	19.92821663195	29	236	cardiac muscle tissue development	0.122881355932203
GO:0001822	0.0146446808270865	1.5308828529334	24.7413875981413	36	293	kidney development	0.122866894197952
GO:0033554	1.49267352641493e-09	1.60645594701699	157.399134754046	229	1864	cellular response to stress	0.122854077253219
GO:0031399	7.85388136131974e-08	1.58654389870008	126.493510655344	184	1498	regulation of protein modification process	0.12283044058745
GO:0030155	0.000160351588609528	1.55030344290397	63.2467553276718	92	749	regulation of cell adhesion	0.12283044058745
GO:0019725	2.93818222561793e-05	1.55810955906932	77.6862682262458	113	920	cellular homeostasis	0.122826086956522
GO:0009628	2.95895270365196e-06	1.56890309500166	96.9389520910111	141	1148	response to abiotic stimulus	0.122822299651568
GO:0045765	0.00901036027533369	1.53208576998051	28.8790257971479	42	342	regulation of angiogenesis	0.12280701754386
GO:0044772	0.00411388676184098	1.53315470790523	35.8032366607915	52	424	mitotic cell cycle phase transition	0.122641509433962
GO:0051249	0.00173265370811374	1.5359412110111	43.4029802916199	63	514	regulation of lymphocyte activation	0.122568093385214
GO:0009306	0.00792218697764099	1.52923753756545	30.3145329274155	44	359	protein secretion	0.122562674094708
GO:1901888	0.0379956324332295	1.52257974178168	17.226085563211	25	204	regulation of cell junction assembly	0.122549019607843
GO:0010243	9.03680564955582e-06	1.55936728560695	88.9170004806922	129	1053	response to organonitrogen compound	0.122507122507123
GO:0070201	0.00139910146315574	1.53525212986415	45.5140201890723	66	539	regulation of establishment of protein localization	0.122448979591837
GO:0032496	0.00945513337167952	1.52690511809239	28.963467393046	42	343	response to lipopolysaccharide	0.122448979591837
GO:0044057	0.000949638233694813	1.53650580933918	48.9761256208941	71	580	regulation of system process	0.122413793103448
GO:0051338	5.96350506318193e-05	1.54905619982159	73.1264220477488	106	866	regulation of transferase activity	0.122401847575058
GO:0051707	1.31381649062981e-07	1.57812238608849	124.88912033328	181	1479	response to other organism	0.12237998647735
GO:0033673	0.0275980705258958	1.52125669111816	20.0126582278481	29	237	negative regulation of kinase activity	0.122362869198312
GO:0032270	3.93999116928025e-07	1.57248548598814	115.938311168082	168	1373	positive regulation of cellular protein metabolic process	0.122359796067007
GO:0008064	0.045830623536532	1.518928696464	15.8750200288415	23	188	regulation of actin polymerization or depolymerization	0.122340425531915
GO:0051235	0.0112913364450395	1.52441850737224	27.6124018586765	40	327	maintenance of location	0.122324159021407
GO:0043207	1.37720125618978e-07	1.57680798416364	124.973561929178	181	1480	response to external biotic stimulus	0.122297297297297
GO:0071692	0.00760796981078025	1.52552365518576	31.0745072904983	45	368	protein localization to extracellular region	0.122282608695652
GO:0035592	0.0083099153925968	1.52430758587747	30.3989745233136	44	360	establishment of protein localization to extracellular region	0.122222222222222
GO:0090132	0.0083099153925968	1.52430758587747	30.3989745233136	44	360	epithelium migration	0.122222222222222
GO:0009607	9.53473890191554e-08	1.57744510978044	128.520108956898	186	1522	response to biotic stimulus	0.122207621550591
GO:0042326	0.00668899529135564	1.52324047429854	32.5100144207659	47	385	negative regulation of phosphorylation	0.122077922077922
GO:0033674	0.00306204113069467	1.52634914538122	39.4342252844095	57	467	positive regulation of kinase activity	0.122055674518201
GO:1903037	0.0108375525626588	1.5204204270306	28.3723762217593	41	336	regulation of leukocyte cell-cell adhesion	0.12202380952381
GO:0060627	0.00182745447454054	1.52656587596538	44.331837846499	64	525	regulation of vesicle-mediated transport	0.121904761904762
GO:1902105	0.0193157232026975	1.51576586678628	23.559205255568	34	279	regulation of leukocyte differentiation	0.121863799283154
GO:0035556	7.84429876218593e-13	1.63250195497387	222.503605191476	321	2635	intracellular signal transduction	0.121821631878558
GO:0090287	0.015477335954417	1.51456162310066	25.6702451530203	37	304	regulation of cellular response to growth factor stimulus	0.121710526315789
GO:0030832	0.0481842612254223	1.50968959277418	15.9594616247396	23	189	regulation of actin filament length	0.121693121693122
GO:0046578	0.0481842612254223	1.50968959277418	15.9594616247396	23	189	regulation of Ras protein signal transduction	0.121693121693122
GO:0003012	0.00381956480063126	1.52020725559653	38.1676013459382	55	452	muscle system process	0.121681415929204
GO:0090066	0.00208766203729754	1.52207357859532	43.7407466752123	63	518	regulation of anatomical structure size	0.121621621621622
GO:1902531	2.59292497924658e-08	1.57611143695015	143.04406345137	206	1694	regulation of intracellular signal transduction	0.121605667060213
GO:0000082	0.038225464375638	1.50784702743381	18.070501522192	26	214	G1/S transition of mitotic cell cycle	0.121495327102804
GO:0051651	0.038225464375638	1.50784702743381	18.070501522192	26	214	maintenance of location in cell	0.121495327102804
GO:0071417	0.000744326247826649	1.52441484586883	53.5359717993911	77	634	cellular response to organonitrogen compound	0.121451104100946
GO:1903827	0.00200396862952236	1.51978939904979	44.5007210382951	64	527	regulation of cellular protein localization	0.121442125237192
GO:0042327	0.000150899532341526	1.53163592648988	68.1443678897613	98	807	positive regulation of phosphorylation	0.121437422552664
GO:0008016	0.041956119991771	1.50557812211507	17.3949687550072	25	206	regulation of heart contraction	0.121359223300971
GO:0032940	0.000187899751290457	1.52755137582724	66.8777439512899	96	792	secretion by cell	0.121212121212121
GO:0010638	0.00272207976461834	1.51277028632529	42.558564332639	61	504	positive regulation of organelle organization	0.121031746031746
GO:0009914	0.0170089591806302	1.50312277288749	25.8391283448165	37	306	hormone transport	0.120915032679739
GO:0006468	1.90862789467431e-07	1.5566893830703	130.63114885435	187	1547	protein phosphorylation	0.120879120879121
GO:0008285	0.000244578372812411	1.5210302150804	65.6955616087165	94	778	negative regulation of cell population proliferation	0.120822622107969
GO:1902532	0.00210601577232929	1.51099337859171	45.4295785931742	65	538	negative regulation of intracellular signal transduction	0.120817843866171
GO:0009617	0.000330875631145698	1.51937579676532	62.9089889440795	90	745	response to bacterium	0.120805369127517
GO:0045597	0.000117261246122797	1.52406472114474	72.7042140682583	104	861	positive regulation of cell differentiation	0.120789779326365
GO:0043549	0.000317261160510715	1.51800236873273	63.6689633071623	91	754	regulation of kinase activity	0.120689655172414
GO:1901342	0.0119612530705323	1.50150976569965	29.3856753725365	42	348	regulation of vasculature development	0.120689655172414
GO:0071103	0.0203501455509166	1.49923902290541	24.488062810447	35	290	DNA conformation change	0.120689655172414
GO:0018105	0.0162964009863008	1.49942327174546	26.5991027078994	38	315	peptidyl-serine phosphorylation	0.120634920634921
GO:1904062	0.0114630244460901	1.49835587618961	30.1456497356193	43	357	regulation of cation transmembrane transport	0.120448179271709
GO:0002377	0.0421013876615936	1.49179895075309	18.2393847139881	26	216	immunoglobulin production	0.12037037037037
GO:0060485	0.0213186514422735	1.49329418661061	24.5725044063451	35	291	mesenchyme development	0.120274914089347
GO:1901215	0.0462130680905236	1.48894812255047	17.5638519468034	25	208	negative regulation of neuron death	0.120192307692308
GO:0045936	0.00571357504357347	1.49774990554326	37.2387437910591	53	441	negative regulation of phosphate metabolic process	0.120181405895692
GO:0031400	0.00298770758652953	1.50031466331026	43.5718634834161	62	516	negative regulation of protein modification process	0.12015503875969
GO:0051050	0.000107986411063769	1.51561482152834	75.9129947123858	108	899	positive regulation of transport	0.120133481646274
GO:0051128	4.1992224276769e-10	1.57707509881423	189.99359077071	270	2250	regulation of cellular component organization	0.12
GO:0050769	0.0402359883651575	1.48683748683749	18.999359077071	27	225	positive regulation of neurogenesis	0.12
GO:0002521	0.00251763906535325	1.49796302749705	45.7673449767665	65	542	leukocyte differentiation	0.119926199261993
GO:0010563	0.00597478201518493	1.49381048197149	37.3231853869572	53	442	negative regulation of phosphorus metabolic process	0.119909502262443
GO:0044093	6.21296050714897e-07	1.53792690155616	126.071302675853	179	1493	positive regulation of molecular function	0.119892833221701
GO:0010632	0.0223233052988094	1.48739561363327	24.6569460022432	35	292	regulation of epithelial cell migration	0.11986301369863
GO:0046903	9.08214720009423e-05	1.5117846593884	78.9528921647172	112	935	secretion	0.119786096256684
GO:0060284	0.00371421007240129	1.49391512028875	42.3052395449447	60	501	regulation of cell development	0.119760479041916
GO:0001816	0.00026840100985184	1.50611950567626	68.3976926774555	97	810	cytokine production	0.119753086419753
GO:0015850	0.0244247212506839	1.48501098901099	23.9814132350585	34	284	organic hydroxy compound transport	0.119718309859155
GO:0060560	0.0384486445614402	1.48227983420752	19.7593334401538	28	234	developmental growth involved in morphogenesis	0.11965811965812
GO:0044782	0.0120195185554045	1.48596351719319	31.0745072904983	44	368	cilium organization	0.119565217391304
GO:0006302	0.0335257715249221	1.48095959109726	21.1948405704214	30	251	double-strand break repair	0.119521912350598
GO:0010562	0.000152926739227523	1.50547190694242	74.8996955616087	106	887	positive regulation of phosphorus metabolic process	0.119503945885006
GO:0045937	0.000152926739227523	1.50547190694242	74.8996955616087	106	887	positive regulation of phosphate metabolic process	0.119503945885006
GO:0060322	0.000333195902701381	1.50162468756008	67.1310687389841	95	795	head development	0.119496855345912
GO:0070661	0.018692980252635	1.48309415794834	26.8524274955937	38	318	leukocyte proliferation	0.119496855345912
GO:0007166	4.21848010000853e-12	1.59553278429888	233.227687870534	330	2762	cell surface receptor signaling pathway	0.119478638667632
GO:0044089	0.00341026582607785	1.49019782967892	43.8251882711104	62	519	positive regulation of cellular component biogenesis	0.119460500963391
GO:0007167	8.31972605267618e-05	1.50728622358362	81.3172568498638	115	963	enzyme linked receptor protein signaling pathway	0.119418483904465
GO:0072001	0.0223488852852077	1.47829768596248	25.5013619612242	36	302	renal system development	0.119205298013245
GO:0070887	2.63451581637239e-13	1.60766623002166	258.560166639962	365	3062	cellular response to chemical stimulus	0.119203135205748
GO:0043085	2.2289330226631e-05	1.51024039780806	95.6723281525397	135	1133	positive regulation of catalytic activity	0.119152691968226
GO:0007204	0.0195518095408896	1.47772860098297	26.9368690914917	38	319	positive regulation of cytosolic calcium ion concentration	0.119122257053292
GO:0044087	0.000107853673357209	1.50139010208206	80.1350745072905	113	949	regulation of cellular component biogenesis	0.119072708113804
GO:0006935	0.00186630286650987	1.48682389714247	51.0871655183464	72	605	chemotaxis	0.11900826446281
GO:0055082	0.000292407158507936	1.4954267029732	70.2554077872136	99	832	cellular chemical homeostasis	0.118990384615385
GO:0032446	0.000245792081977068	1.49480021893815	72.450889280564	102	858	protein modification by small protein conjugation	0.118881118881119
GO:0051222	0.023372853076757	1.4726737209556	25.5858035571223	36	303	positive regulation of protein transport	0.118811881188119
GO:0009416	0.0204418700351265	1.47240109761311	27.0213106873898	38	320	response to light stimulus	0.11875
GO:0051346	0.0125688995491963	1.47431699101796	32.0033648453773	45	379	negative regulation of hydrolase activity	0.118733509234828
GO:0032879	7.39206227283182e-12	1.58347530806572	236.858676494152	333	2805	regulation of localization	0.118716577540107
GO:0007049	1.79226542292422e-07	1.52897999877762	145.830636116007	205	1727	cell cycle	0.118702953097858
GO:0030072	0.0421563698724597	1.46785378176235	19.92821663195	28	236	peptide hormone secretion	0.11864406779661
GO:1901700	2.46498379105705e-07	1.52529525534723	143.888479410351	202	1704	response to oxygen-containing compound	0.118544600938967
GO:0002237	0.0149841998294908	1.46973748374512	30.6522993110079	43	363	response to molecule of bacterial origin	0.118457300275482
GO:0042330	0.00212090855755563	1.47823506720869	51.3404903060407	72	608	taxis	0.118421052631579
GO:0042592	1.32609492240317e-07	1.52631298946962	151.234898253485	212	1791	homeostatic process	0.118369625907314
GO:0007420	0.000691114818681573	1.48264954569165	63.5000801153661	89	752	brain development	0.118351063829787
GO:0001655	0.0186920608326076	1.46718987496135	28.5412594135555	40	338	urogenital system development	0.118343195266272
GO:0065003	8.91994962666853e-07	1.51572871572872	132.742188751803	186	1572	protein-containing complex assembly	0.118320610687023
GO:0010466	0.0350722563936928	1.46415584415584	22.1236981253004	31	262	negative regulation of peptidase activity	0.118320610687023
GO:0001525	0.00251819413407422	1.47500703652145	49.9894247716712	70	592	angiogenesis	0.118243243243243
GO:0001775	6.04358672226263e-05	1.49261680193025	90.0147412273674	126	1066	cell activation	0.118198874296435
GO:0051090	0.0084685140943299	1.46852939391692	37.154302195161	52	440	regulation of DNA-binding transcription factor activity	0.118181818181818
GO:0031667	0.00652106944952906	1.46920385912621	40.0253164556962	56	474	response to nutrient levels	0.118143459915612
GO:0009165	0.038412170070722	1.46086626139818	21.4481653581157	30	254	nucleotide biosynthetic process	0.118110236220472
GO:0071396	0.00298977144165133	1.47164469609838	48.6383592373017	68	576	cellular response to lipid	0.118055555555556
GO:0046651	0.0292289587198737	1.46127887860171	24.3191796186509	34	288	lymphocyte proliferation	0.118055555555556
GO:0008283	2.79152806566504e-08	1.52953432360529	169.643166159269	237	2009	cell population proliferation	0.117969138875062
GO:0001817	0.000554647296246632	1.47821278964874	67.2999519307803	94	797	regulation of cytokine production	0.117942283563363
GO:0033157	0.0483624512445272	1.45705111051646	19.3371254606634	27	229	regulation of intracellular protein transport	0.117903930131004
GO:0042325	1.73289480757402e-05	1.49352433504726	105.38311168082	147	1248	regulation of phosphorylation	0.117788461538462
GO:0010647	5.20437412727247e-07	1.51170094037559	141.946322704695	198	1681	positive regulation of cell communication	0.117787031528852
GO:0010628	4.20450241324813e-05	1.48851174431507	96.0945361320301	134	1138	positive regulation of gene expression	0.117750439367311
GO:0030855	0.00202224441991479	1.46921211949356	53.7892965870854	75	637	epithelial cell differentiation	0.117739403453689
GO:0007015	0.00921838379072127	1.46082406801831	37.3231853869572	52	442	actin filament organization	0.117647058823529
GO:0001503	0.0119901517211021	1.45962165688193	34.452171126422	48	408	ossification	0.117647058823529
GO:0051962	0.0349993133527665	1.45487411233054	22.9681140842814	32	272	positive regulation of nervous system development	0.117647058823529
GO:0098609	0.000300618258199626	1.47638871693285	75.4063451369973	105	893	cell-cell adhesion	0.117581187010078
GO:0022607	1.87489383617928e-11	1.56458320094557	242.094055439833	337	2867	cellular component assembly	0.117544471573073
GO:1902903	0.0149309910948764	1.45652274408284	32.3411312289697	45	383	regulation of supramolecular fiber organization	0.117493472584856
GO:0051301	0.00261347431649323	1.46413202853122	51.7626982855312	72	613	cell division	0.117455138662316
GO:0015833	0.0383140549062037	1.45141630901288	22.2925813170966	31	264	peptide transport	0.117424242424242
GO:0032868	0.0383140549062037	1.45141630901288	22.2925813170966	31	264	response to insulin	0.117424242424242
GO:0050808	0.0109634576529915	1.45625165029115	35.9721198525877	50	426	synapse organization	0.117370892018779
GO:0023056	6.6853451980802e-07	1.50503256709725	142.452972280083	198	1687	positive regulation of signaling	0.117368109069354
GO:0016567	0.00068109319619446	1.46732700352205	67.7221599102708	94	802	protein ubiquitination	0.117206982543641
GO:0014706	0.0155748724257519	1.45213979535398	32.4255728248678	45	384	striated muscle tissue development	0.1171875
GO:0034976	0.0419551314632235	1.44776707006042	21.6170485499119	30	256	response to endoplasmic reticulum stress	0.1171875
GO:1901293	0.0419551314632235	1.44776707006042	21.6170485499119	30	256	nucleoside phosphate biosynthetic process	0.1171875
GO:0070848	0.00135711708133677	1.4610419577325	60.629065854831	84	718	response to growth factor	0.116991643454039
GO:0051052	0.0194175172629982	1.44845991600101	30.3145329274155	42	359	regulation of DNA metabolic process	0.116991643454039
GO:0019220	8.897749363936e-06	1.48576730191721	117.711584681942	163	1394	regulation of phosphate metabolic process	0.116929698708752
GO:0051174	8.897749363936e-06	1.48576730191721	117.711584681942	163	1394	regulation of phosphorus metabolic process	0.116929698708752
GO:0060562	0.0253870778955068	1.44632046264912	27.4435186668803	38	325	epithelial tube morphogenesis	0.116923076923077
GO:0060341	0.000706189968246143	1.4623767981195	68.6510174651498	95	813	regulation of cellular localization	0.116851168511685
GO:0032943	0.0332887741854334	1.44396459571557	24.5725044063451	34	291	mononuclear cell proliferation	0.116838487972509
GO:0009057	1.81712627131494e-05	1.48027534263489	110.618490626502	153	1310	macromolecule catabolic process	0.116793893129771
GO:0071310	2.92798487829123e-09	1.52593473992785	204.095337285691	282	2417	cellular response to organic substance	0.116673562267273
GO:0034622	0.000111489434020985	1.46781238192908	91.2813651658388	126	1081	cellular protein-containing complex assembly	0.116558741905643
GO:0008104	2.32149301778176e-09	1.52543768183471	207.979650697004	287	2463	protein localization	0.116524563540398
GO:0071363	0.00198464027930719	1.45186020961314	58.0113763819901	80	687	cellular response to growth factor stimulus	0.116448326055313
GO:0065008	1.82964501284805e-14	1.59271270044792	316.909309405544	437	3753	regulation of biological quality	0.116440181188383
GO:0000902	0.000234134826455909	1.46187582921947	83.4282967473161	115	988	cell morphogenesis	0.116396761133603
GO:0051336	0.000164400603613339	1.46301295332926	87.819259734017	121	1040	regulation of hydrolase activity	0.116346153846154
GO:0016310	5.02509448386973e-07	1.49291916104539	153.937029322224	212	1823	phosphorylation	0.116291826659353
GO:0048878	5.17975195076466e-05	1.46809598597465	101.667681461304	140	1204	chemical homeostasis	0.116279069767442
GO:0009725	0.000610624996561592	1.45545328547567	72.6197724723602	100	860	response to hormone	0.116279069767442
GO:0045321	0.000377295198302804	1.45755387473922	78.4462425893286	108	929	leukocyte activation	0.116254036598493
GO:0007417	0.000195011936628285	1.4603494796351	86.4681941996475	119	1024	central nervous system development	0.1162109375
GO:0007517	0.0276102804332002	1.43614089301612	27.6124018586765	38	327	muscle organ development	0.116207951070336
GO:0016049	0.00908226455533775	1.44092357423228	40.7008492228809	56	482	cell growth	0.116182572614108
GO:0006163	0.016851656055988	1.43775151233132	33.4388719756449	46	396	purine nucleotide metabolic process	0.116161616161616
GO:0006816	0.0141014431058964	1.43792305700026	35.6343534689954	49	422	calcium ion transport	0.116113744075829
GO:0031344	0.0029136132864222	1.44526970925405	54.5492709501682	75	646	regulation of cell projection organization	0.11609907120743
GO:0044248	4.16320798136235e-08	1.50414537127749	182.562730331678	251	2162	cellular catabolic process	0.116096207215541
GO:0048468	8.2642983726112e-08	1.50025905892879	175.300753084442	241	2076	cell development	0.116088631984586
GO:0006874	0.0118086549111209	1.43817507977089	37.8298349623458	52	448	cellular calcium ion homeostasis	0.116071428571429
GO:0018193	3.91304997362853e-05	1.46666081768731	106.227527639801	146	1258	peptidyl-amino acid modification	0.116057233704293
GO:0009056	2.98239142315658e-09	1.51774029041993	211.103989745233	290	2500	catabolic process	116
GO:1904951	0.0301610539294489	1.43272516811818	26.9368690914917	37	319	positive regulation of establishment of protein localization	0.115987460815047
GO:0006873	0.0027694864009424	1.44134688449848	56.153661272232	77	665	cellular ion homeostasis	0.115789473684211
GO:0043933	1.16485030729908e-06	1.48186183616222	148.78609197244	204	1762	protein-containing complex subunit organization	0.11577752553916
GO:0051094	3.0680872770081e-05	1.46414163606215	110.871815414196	152	1313	positive regulation of developmental process	0.115765422696116
GO:0030003	0.00315297417968899	1.44005131307232	54.7181541419644	75	648	cellular cation homeostasis	0.115740740740741
GO:0051246	2.48378972844367e-09	1.51465758836529	216.846018266303	297	2568	regulation of protein metabolic process	0.115654205607477
GO:0016042	0.0314317599509681	1.42757785752211	27.0213106873898	37	320	lipid catabolic process	0.115625
GO:0006875	0.00529999935295336	1.43449056370561	48.9761256208941	67	580	cellular metal ion homeostasis	0.11551724137931
GO:0050863	0.0299826587365204	1.4261012487389	27.7812850504727	38	329	regulation of T cell activation	0.115501519756839
GO:0048871	0.00858198774127698	1.43138104264301	43.1496555039257	59	511	multicellular organismal homeostasis	0.11545988258317
GO:0051345	0.00506472149249592	1.43380275615174	49.7360999839769	68	589	positive regulation of hydrolase activity	0.115449915110357
GO:0022402	0.000100565436558512	1.45291358470143	98.7966672007691	135	1170	cell cycle process	0.115384615384615
GO:0018209	0.0286020251845651	1.42471663001184	28.5412594135555	39	338	peptidyl-serine modification	0.115384615384615
GO:0016192	6.27547797031445e-06	1.46741148620832	132.488863964108	181	1569	vesicle-mediated transport	0.115360101975781
GO:0046879	0.0393567636234586	1.4214980421877	24.9102707899375	34	295	hormone secretion	0.115254237288136
GO:0055074	0.0127155271295682	1.42621113498077	38.8431341131229	53	460	calcium ion homeostasis	0.115217391304348
GO:0035295	0.000175461579801674	1.44500333634944	93.9834962345778	128	1113	tube development	0.115004492362983
GO:0001944	0.00140111263400474	1.43417832466335	67.5532767184746	92	800	vasculature development	115
GO:0051239	1.5514497173953e-09	1.50838941776707	230.778881589489	314	2733	regulation of multicellular organismal process	0.114892060007318
GO:0009991	0.0101031895771102	1.42235168137771	42.6430059285371	58	505	response to extracellular stimulus	0.114851485148515
GO:0051049	2.31459276705843e-06	1.46624079049771	148.532767184746	202	1759	regulation of transport	0.114837976122797
GO:0061061	0.00435747634338022	1.42551389628317	53.7048549911873	73	636	muscle structure development	0.114779874213836
GO:0009605	1.19315721640968e-09	1.50810895709494	235.507610959782	320	2789	response to external stimulus	0.114736464682682
GO:0002263	0.0470425726288099	1.41305739892264	23.559205255568	32	279	cell activation involved in immune response	0.114695340501792
GO:0043542	0.0470425726288099	1.41305739892264	23.559205255568	32	279	endothelial cell migration	0.114695340501792
GO:0048732	0.0164328224754312	1.41767885123679	36.8165358115687	50	436	gland development	0.114678899082569
GO:0120035	0.00473893975699585	1.42334482314745	53.0293222240026	72	628	regulation of plasma membrane bounded cell projection organization	0.114649681528662
GO:0051276	0.00110575563446804	1.43032750743566	72.1975644928697	98	855	chromosome organization	0.114619883040936
GO:0010975	0.0156866596738105	1.41692047377327	37.5765101746515	51	445	regulation of neuron projection development	0.114606741573034
GO:0045596	0.00346700764683227	1.42340195231428	57.5047268066015	78	681	negative regulation of cell differentiation	0.114537444933921
GO:0009117	0.0119701805857634	1.4170355506758	41.2919403941676	56	489	nucleotide metabolic process	0.114519427402863
GO:0098771	0.00242298403663989	1.42339043934789	62.7401057522833	85	743	inorganic ion homeostasis	0.114401076716016
GO:0032870	0.00668041513447379	1.41739525507594	49.4827751962826	67	586	cellular response to hormone stimulus	0.114334470989761
GO:0032102	0.0194988969543455	1.41152705005997	35.4654702771992	48	420	negative regulation of response to external stimulus	0.114285714285714
GO:0034329	0.0194988969543455	1.41152705005997	35.4654702771992	48	420	cell junction assembly	0.114285714285714
GO:0060429	0.000260406380386344	1.43281030716796	93.1390802755969	126	1103	epithelium development	0.114233907524932
GO:0006508	3.74671366053483e-06	1.45578919208882	147.857234417561	200	1751	proteolysis	0.114220445459737
GO:0032268	4.01398167203675e-08	1.48149169629596	202.575388559526	274	2399	regulation of cellular protein metabolic process	0.114214255939975
GO:0055065	0.00445472402903828	1.41701236291946	55.4781285050473	75	657	metal ion homeostasis	0.114155251141553
GO:0060537	0.0222641975996019	1.40897270960501	34.0299631469316	46	403	muscle tissue development	0.114143920595533
GO:0044085	1.83417690044518e-10	1.512382725077	263.373337606153	356	3119	cellular component biogenesis	0.114139147162552
GO:0009150	0.0279637402456093	1.40771834152525	31.0745072904983	42	368	purine ribonucleotide metabolic process	0.114130434782609
GO:0022603	0.00063018992342625	1.42610919077608	82.1616728088447	111	973	regulation of anatomical structure morphogenesis	0.114080164439877
GO:0040008	0.00462466895815573	1.41449638837446	55.5625701009454	75	658	regulation of growth	0.113981762917933
GO:0006281	0.0112432658374423	1.40896051806618	43.7407466752123	59	518	DNA repair	0.113899613899614
GO:0001568	0.00247219153800957	1.41625586541142	64.5133792661432	87	764	blood vessel development	0.113874345549738
GO:0055080	0.00308397850682791	1.41485654763627	61.55792340971	83	729	cation homeostasis	0.113854595336077
GO:0000904	0.00384730695126353	1.41343574421097	58.6024675532767	79	694	cell morphogenesis involved in differentiation	0.113832853025937
GO:0044265	0.000288139607788461	1.42658027852457	94.2368210222721	127	1116	cellular macromolecule catabolic process	0.113799283154122
GO:0042113	0.0366057291997283	1.40159569809602	28.2034930299631	38	334	B cell activation	0.11377245508982
GO:0006996	7.21914169009167e-12	1.52663732510018	304.66527800032	410	3608	organelle organization	0.113636363636364
GO:0019693	0.0252086112691106	1.40149238782051	33.4388719756449	45	396	ribose phosphate metabolic process	0.113636363636364
GO:0034613	7.70703563819602e-06	1.44091785767272	145.999519307803	196	1729	cellular protein localization	0.11336032388664
GO:1901575	1.08773968182323e-06	1.45122664700098	172.176414036212	231	2039	organic substance catabolic process	0.113290828837666
GO:0048583	1.25597570704762e-12	1.53358864145594	328.815574427175	441	3894	regulation of response to stimulus	0.113251155624037
GO:0000003	3.57311118923223e-05	1.43004450233366	126.831277038936	170	1502	reproduction	0.113182423435419
GO:0061024	0.00235552928879969	1.405170697767	68.7354590610479	92	814	membrane organization	0.113022113022113
GO:0033036	3.35697273558689e-09	1.48210697850986	246.569460022432	330	2920	macromolecule localization	0.113013698630137
GO:0051641	7.78649929081304e-09	1.47601596716803	237.787534049031	318	2816	cellular localization	0.112926136363636
GO:0003006	0.000865760254514169	1.40892381954329	83.7660631309085	112	992	developmental process involved in reproduction	0.112903225806452
GO:0009888	4.52203705916065e-06	1.43737675057087	157.905784329434	211	1870	tissue development	0.11283422459893
GO:0022414	4.65606648992061e-05	1.42294191569576	126.577952251242	169	1499	reproductive process	0.112741827885257
GO:0006753	0.0161640386392919	1.39066354410617	41.9674731613523	56	497	nucleoside phosphate metabolic process	0.112676056338028
GO:0051649	1.44710081545365e-06	1.44119252713912	175.469636276238	234	2078	establishment of localization in cell	0.112608277189605
GO:0070727	1.23464668841159e-05	1.42761149069918	147.097260054478	196	1742	cellular macromolecule localization	0.112514351320321
GO:0023061	0.0209979505871034	1.38444572808906	39.0964589008172	52	463	signal release	0.11231101511879
GO:0048514	0.00606447253649049	1.38987986060161	57.926934786092	77	686	blood vessel morphogenesis	0.112244897959184
GO:0016043	3.22926077923242e-20	1.6434756240181	504.960743470598	671	5980	cellular component organization	0.112207357859532
GO:0009966	7.7106749145808e-09	1.46740188247564	248.42717513219	330	2942	regulation of signal transduction	0.112168592794018
GO:2000026	0.000125888885943438	1.40985436377166	116.698285531165	155	1382	regulation of multicellular organismal development	0.112156295224313
GO:0010033	3.88961363567171e-09	1.46905849718528	260.248998557923	345	3082	response to organic substance	0.111940298507463
GO:0009719	4.36392587010664e-05	1.41142551027164	135.190995032847	179	1601	response to endogenous stimulus	0.111805121798876
GO:0009259	0.0360223998433072	1.3733944744827	32.5100144207659	43	385	ribonucleotide metabolic process	0.111688311688312
GO:0010876	0.0257317539868703	1.37395009009778	37.8298349623458	50	448	lipid localization	0.111607142857143
GO:0055086	0.013908083343714	1.3756830385966	47.7095016824227	63	565	nucleobase-containing small molecule metabolic process	0.111504424778761
GO:0050801	0.00432505884800976	1.38034474270241	66.7088607594937	88	790	ion homeostasis	0.111392405063291
GO:0002250	0.00620277260961187	1.37670788253478	61.4734818138119	81	728	adaptive immune response	0.111263736263736
GO:0006796	9.32533521141699e-08	1.44129320364315	229.258932863323	302	2715	phosphate-containing compound metabolic process	0.111233885819521
GO:0051093	0.0019323189594442	1.38256258379525	80.4728408908829	106	953	negative regulation of developmental process	0.111227701993704
GO:0006793	9.28749591918597e-08	1.43989819890368	231.032206377183	304	2736	phosphorus metabolic process	0.111111111111111
GO:0001558	0.0334794822985527	1.36596091205212	34.9588207018106	46	414	regulation of cell growth	0.111111111111111
GO:0030030	0.000103609388779069	1.39671834073479	128.520108956898	169	1522	cell projection organization	0.111038107752957
GO:0035239	0.00249235272519183	1.37804414806061	77.6018266303477	102	919	tube morphogenesis	0.110990206746464
GO:0120036	0.000136520075360979	1.39413449857084	124.804678737382	164	1478	plasma membrane bounded cell projection organization	0.110960757780785
GO:0032787	0.013401171132714	1.36811843755264	50.2427495593655	66	595	monocarboxylic acid metabolic process	0.110924369747899
GO:0032970	0.0382127268173744	1.36153538496132	33.523313571543	44	397	regulation of actin filament-based process	0.110831234256927
GO:0071840	3.8420124431051e-19	1.61582275707964	521.849062650216	684	6180	cellular component organization or biogenesis	0.110679611650485
GO:0040007	0.00262980774474277	1.37307073797337	78.6151257811248	103	931	growth	0.110633727175081
GO:0006259	0.00327724804082113	1.36997800456164	75.6596699246916	99	896	DNA metabolic process	0.110491071428571
GO:0015031	0.000106435767738523	1.38693398827126	134.768787053357	176	1596	protein transport	0.110275689223058
GO:0051493	0.0216583383719148	1.35681936798155	44.4162794423971	58	526	regulation of cytoskeleton organization	0.110266159695817
GO:0034762	0.0160860715023535	1.35708631737655	49.820541579875	65	590	regulation of transmembrane transport	0.110169491525424
GO:0046649	0.00673117814924543	1.36090710599444	65.188912033328	85	772	lymphocyte activation	0.110103626943005
GO:0007409	0.0384998822096634	1.35095092991489	35.296587085403	46	418	axonogenesis	0.110047846889952
GO:0034765	0.0271054325232565	1.35182279607792	41.4608235859638	54	491	regulation of ion transmembrane transport	0.109979633401222
GO:0045184	8.08128322014084e-05	1.3826983718386	143.804037814453	187	1703	establishment of protein localization	0.109806224310041
GO:0070647	0.00258149902512786	1.3618633803856	83.8505047268066	109	993	protein modification by small protein conjugation or removal	0.109768378650554
GO:0032269	0.00201304685935658	1.36281984357111	88.4947925012017	115	1048	negative regulation of cellular protein metabolic process	0.109732824427481
GO:0043269	0.0109488766459349	1.35248792517648	58.5180259573786	76	693	regulation of ion transport	0.10966810966811
GO:0050790	2.54757767260879e-06	1.40185802458611	202.575388559526	263	2399	regulation of catalytic activity	0.10962901208837
GO:0051179	1.71692071445818e-17	1.57844054647226	525.648934465631	680	6225	localization	0.109236947791165
GO:0051248	0.00181174438363215	1.35553316762595	94.4057042140683	122	1118	negative regulation of protein metabolic process	0.10912343470483
GO:0023057	0.000611838250842482	1.36034207557036	115.431661592693	149	1367	negative regulation of signaling	0.108997805413314
GO:0006464	8.46974915182366e-09	1.43061732740886	301.709822143887	389	3573	cellular protein modification process	0.108872096277638
GO:0036211	8.46974915182366e-09	1.43061732740886	301.709822143887	389	3573	protein modification process	0.108872096277638
GO:0042110	0.0335707951424553	1.33532583781697	41.1230572023714	53	487	T cell activation	0.108829568788501
GO:0045595	0.000292875192883104	1.36168222865383	131.222240025637	169	1554	regulation of cell differentiation	0.108751608751609
GO:0044092	0.00167535513388693	1.35095671683798	98.6277840089729	127	1168	negative regulation of molecular function	0.108732876712329
GO:0010648	0.000749607235583908	1.35385834776391	115.093895209101	148	1363	negative regulation of cell communication	0.108584005869406
GO:0072359	0.00170064814872994	1.34872893314989	99.5566415638519	128	1179	circulatory system development	0.108566581849025
GO:0001501	0.0325441514143615	1.33084064997274	42.8118891203333	55	507	skeletal system development	0.108481262327416
GO:0072657	0.0248605509738669	1.33109243697479	48.3005928537093	62	572	protein localization to membrane	0.108391608391608
GO:0019637	0.00530585441163397	1.33948921846034	78.6995673770229	101	932	organophosphate metabolic process	0.108369098712446
GO:0051960	0.0441391024294065	1.3275136862444	37.4076269828553	48	443	regulation of nervous system development	0.108352144469526
GO:0048729	0.021917137941827	1.32919336051252	51.5093734978369	66	610	tissue morphogenesis	0.108196721311475
GO:0006091	0.0369837724281162	1.32592072316005	41.3763819900657	53	490	generation of precursor metabolites and energy	0.108163265306122
GO:0051241	0.00258711332270423	1.34064292969501	94.4901458099664	121	1119	negative regulation of multicellular organismal process	0.108132260947274
GO:0071495	0.00113602195068609	1.34145194986072	113.573946482935	145	1345	cellular response to endogenous stimulus	0.107806691449814
GO:0009968	0.00163272372555179	1.33871068853829	106.565294023394	136	1262	negative regulation of signal transduction	0.107765451664025
GO:0043086	0.0122368726351337	1.32275302601082	66.7933023553918	85	791	negative regulation of catalytic activity	0.107458912768647
GO:0023051	1.7003159589681e-07	1.39501493412192	282.11937189553	359	3341	regulation of signaling	0.107452858425621
GO:0065009	6.13919968433771e-07	1.38571342757424	261.008972921006	332	3091	regulation of molecular function	0.107408605629246
GO:0010817	0.0399804663274883	1.3147487759308	42.4741227367409	54	503	regulation of hormone levels	0.107355864811133
GO:0048518	6.20748000679942e-15	1.52094124348089	519.315814773273	660	6150	positive regulation of biological process	0.107317073170732
GO:0048646	0.00284662706773748	1.3285229919511	99.2188751802596	126	1175	anatomical structure formation involved in morphogenesis	0.107234042553191
GO:0071705	8.41668797162885e-05	1.35034343844192	172.514180419805	219	2043	nitrogen compound transport	0.1071953010279
GO:0048585	0.0004464444875506	1.33948430134047	138.653100464669	176	1642	negative regulation of response to stimulus	0.107186358099878
GO:0010646	2.84932557382393e-07	1.387284387652	280.76830636116	356	3325	regulation of cell communication	0.107067669172932
GO:0061564	0.0484590436427469	1.3098600153189	39.4342252844095	50	467	axon development	0.107066381156317
GO:0072503	0.045387974161882	1.3092741558743	41.0386156064733	52	486	cellular divalent inorganic cation homeostasis	0.106995884773663
GO:0051234	3.96101818459258e-10	1.43135404426816	394.004486460503	498	4666	establishment of localization	0.106729532790399
GO:0051046	0.0297089702821687	1.304414340351	52.3537894568178	66	620	regulation of secretion	0.106451612903226
GO:0050793	2.53023927526141e-05	1.34909504445517	207.895209101106	262	2462	regulation of developmental process	0.106417546709992
GO:0048522	5.4889355272554e-12	1.45804885312105	475.743951289857	597	5634	positive regulation of cellular process	0.105963791267306
GO:0043412	1.36447923579304e-07	1.37958347507654	319.949206857875	401	3789	macromolecule modification	0.105832673528636
GO:0032990	0.0298612177539289	1.29617264287076	55.0559205255568	69	652	cell part morphogenesis	0.105828220858896
GO:0030001	0.0150360829261184	1.29367088607595	74.5619291780163	93	883	metal ion transport	0.105322763306908
GO:1901135	0.00969848437518935	1.29430510893582	86.7215189873418	108	1027	carbohydrate derivative metabolic process	0.105160662122687
GO:0048232	0.0426232133084973	1.28432282003711	49.820541579875	62	590	male gamete generation	0.105084745762712
GO:0006810	1.3711975198939e-08	1.38908112032346	381.084922288095	474	4513	transport	0.105029913582982
GO:1903530	0.0477076241733635	1.28232053147606	47.4561768947284	59	562	regulation of secretion by cell	0.104982206405694
GO:0007283	0.0468176236260192	1.28128081854043	48.3005928537093	60	572	spermatogenesis	0.104895104895105
GO:0031175	0.0129829583381484	1.28886310904872	81.3172568498638	101	963	neuron projection development	0.104880581516096
GO:0032989	0.0267945706263278	1.28384672097247	62.8245473481814	78	744	cellular component morphogenesis	0.104838709677419
GO:0048869	9.35371480834109e-08	1.37176728142752	353.050312449928	438	4181	cellular developmental process	0.104759626883521
GO:0009653	4.02702567257681e-05	1.32576149276711	227.485659349463	282	2694	anatomical structure morphogenesis	0.10467706013363
GO:0044267	8.73968864905657e-09	1.38834226925987	402.195321262618	498	4763	cellular protein metabolic process	0.10455595213101
GO:0009893	1.18534868771448e-06	1.34916093757016	310.491748117289	384	3677	positive regulation of metabolic process	0.104432961653522
GO:0044281	0.00124402344428873	1.29851239033647	147.181701650377	182	1743	small molecule metabolic process	0.104417670682731
GO:0030154	2.74009235033437e-07	1.35827615355192	345.957218394488	427	4097	cell differentiation	0.104222601903832
GO:0048666	0.0102511292596824	1.28121133284685	93.223521871495	115	1104	neuron development	0.104166666666667
GO:0048812	0.0471171946895954	1.27032649931149	51.9315814773273	64	615	neuron projection morphogenesis	0.104065040650407
GO:1901137	0.0471171946895954	1.27032649931149	51.9315814773273	64	615	carbohydrate derivative biosynthetic process	0.104065040650407
GO:0006886	0.0211454676825821	1.27382901259086	74.7308123698125	92	885	intracellular protein transport	0.103954802259887
GO:0048513	8.4247422079131e-06	1.32498411838941	287.8614004166	353	3409	animal organ development	0.103549427984746
GO:0043436	0.0202333886641977	1.26852618405853	79.1217753565134	97	937	oxoacid metabolic process	0.103521878335112
GO:0051668	0.049416173215298	1.25917553010391	54.8025957378625	67	649	localization within membrane	0.103235747303544
GO:0031325	2.86868361370103e-05	1.31097954898754	267.764300592854	327	3171	positive regulation of cellular metabolic process	0.103122043519395
GO:0046907	0.00479266132772358	1.27263542135155	126.155744271751	154	1494	intracellular transport	0.103078982597055
GO:0019752	0.024346010085677	1.26150846044694	77.0107354590611	94	912	carboxylic acid metabolic process	0.103070175438596
GO:1901564	7.69677079728516e-11	1.41677990156974	530.884313411312	648	6287	organonitrogen compound metabolic process	0.103069826626372
GO:0019538	1.38297972067802e-08	1.36889159177622	452.353629226086	550	5357	protein metabolic process	0.102669404517454
GO:0033365	0.031813834030888	1.25323892450483	72.450889280564	88	858	protein localization to organelle	0.102564102564103
GO:0071702	0.000503964005682368	1.27849657729083	208.232975484698	252	2466	organic substance transport	0.102189781021898
GO:0006082	0.0267385465568997	1.24957650115948	80.9794904662714	98	959	organic acid metabolic process	0.102189781021898
GO:0010604	4.57623438374024e-05	1.29415579013828	285.074827751963	344	3376	positive regulation of macromolecule metabolic process	0.101895734597156
GO:0006812	0.0172435120588289	1.24738963766135	99.5566415638519	120	1179	cation transport	0.101781170483461
GO:0022008	0.00578177169928169	1.25444877771297	137.808684505688	166	1632	neurogenesis	0.10171568627451
GO:0051173	0.000224672656598767	1.2757314702024	250.707098221439	301	2969	positive regulation of nitrogen compound metabolic process	0.101380936342203
GO:0098655	0.0382238891261366	1.23459428711407	76.7574106713668	92	909	cation transmembrane transport	0.101210121012101
GO:0044703	0.028795756776453	1.2344979060697	88.5792340970998	106	1049	multi-organism reproductive process	0.101048617731173
GO:0044255	0.0332636470874687	1.23299622939253	83.5971799391123	100	990	cellular lipid metabolic process	0.101010101010101
GO:0042221	4.12884953179725e-06	1.30555506017547	377.876141643967	452	4475	response to chemical	0.101005586592179
GO:0051704	0.0309491909808077	1.22776435465712	90.6902739945522	108	1074	multi-organism process	0.100558659217877
GO:0007399	0.00161992864962354	1.24975722900881	204.179778881589	243	2418	nervous system development	0.100496277915633
GO:0051716	1.23331405328938e-10	1.40016209529497	628.752123057202	748	7446	cellular response to stimulus	0.100456621004566
GO:0032502	2.39505813084398e-08	1.34673869547819	536.035250761096	636	6348	developmental process	0.100189035916824
GO:0007275	2.96988455092181e-06	1.2972834313326	434.45201089569	513	5145	multicellular organism development	0.0997084548104956
GO:0048856	6.75634234830029e-07	1.3099181588797	483.681461304278	570	5728	anatomical structure development	0.0995111731843575
GO:0048731	1.25315645480693e-05	1.28092436075746	404.475244351867	476	4790	system development	0.0993736951983299
GO:0050896	1.64411220165069e-12	1.44586722661905	759.129947123858	892	8990	response to stimulus	0.0992213570634038
GO:0007165	5.32257724363591e-07	1.31007150079445	503.947444319821	592	5968	signal transduction	0.0991957104557641
GO:0006629	0.0283826735818885	1.20914420867359	112.560647332158	132	1333	lipid metabolic process	0.0990247561890473
GO:0048523	2.12849836972167e-05	1.26972972972973	415.959301394007	486	4926	negative regulation of cellular process	0.0986601705237515
GO:0023052	6.57902641033643e-07	1.3017077922761	545.15494311809	634	6456	signaling	0.0982032218091698
GO:0007154	7.79849510070583e-07	1.29885106675821	549.630347700689	638	6509	cell communication	0.0980181287448149
GO:0048699	0.0379185648857411	1.1829572132116	127.844576189713	147	1514	generation of neurons	0.0970937912813738
GO:0031324	0.01159428519712	1.18506668799616	217.352667841692	248	2574	negative regulation of cellular metabolic process	0.0963480963480964
GO:0032501	1.03556272096915e-06	1.28776450901816	639.391764140362	729	7572	multicellular organismal process	0.0962757527733756
GO:1901566	0.0396285524699037	1.17088494627494	144.057362602147	164	1706	organonitrogen compound biosynthetic process	0.0961313012895662
GO:0051172	0.0297655289894376	1.15717354428332	203.25092132671	228	2407	negative regulation of nitrogen compound metabolic process	0.0947237224761113
GO:0048519	0.0011698962114621	1.18761285755987	484.694760455055	539	5740	negative regulation of biological process	0.0939024390243902
GO:0031323	0.0115099839842439	1.13669278270587	503.018586764942	544	5957	regulation of cellular metabolic process	0.0913211347993957
GO:0051171	0.0407081626779766	1.10578804228627	470.086364364685	501	5567	regulation of nitrogen compound metabolic process	0.0899946111011317
GO:0044260	0.0352666543248615	1.10214857880259	665.484217272873	700	7881	cellular macromolecule metabolic process	0.088821215581779
GO:0050794	0.00658773361773832	1.14504844320673	943.381509373498	990	11172	regulation of cellular process	0.0886143931256713
GO:0065007	0.00235093469480542	1.17805233217503	1074.68819099503	1125	12727	biological regulation	0.0883947513160996
GO:0009987	8.60934680325593e-10	2.05402040412044	1460.16407626983	1517	17292	cellular process	0.0877284293314828
GO:0050789	0.0404067739731706	1.10307799760023	1013.72135875661	1046	12005	regulation of biological process	0.0871303623490212
