# Supplementary material for: Buffy Coat Transcriptomic Analysis Reveals Alterations in Host Cell Protein Synthesis and Cell Cycle in Severe COVID-19 Patients
Source: Int J Mol Sci. 2022 Nov 5;23(21):13588. doi: 10.3390/ijms232113588 (PMC9659271; doi:10.3390/ijms232113588)
Supplement: Supplementary file 1 [file ijms-23-13588-s001.zip › Table S6.ods]

## Sheet: Table S6
Table S6. Gene ontology biological processes enrichment analysis of the genes from interactive network of the FBL connected to all upregulated DEGs.
GOBPID	Pvalue	OddsRatio	ExpCount	Count	Size	Term	Gene Ratio
GO:0033277	0.00278756856228415	Inf	0.105645462799765	2	2	abortive mitotic cell cycle	1
GO:0036048	0.00278756856228415	Inf	0.105645462799765	2	2	protein desuccinylation	1
GO:0036049	0.00278756856228415	Inf	0.105645462799765	2	2	peptidyl-lysine desuccinylation	1
GO:0042495	0.00278756856228415	Inf	0.105645462799765	2	2	detection of triacyl bacterial lipopeptide	1
GO:0060279	0.00278756856228415	Inf	0.105645462799765	2	2	positive regulation of ovulation	1
GO:0061698	0.00278756856228415	Inf	0.105645462799765	2	2	protein deglutarylation	1
GO:0061699	0.00278756856228415	Inf	0.105645462799765	2	2	peptidyl-lysine deglutarylation	1
GO:0070946	0.00278756856228415	Inf	0.105645462799765	2	2	neutrophil-mediated killing of gram-positive bacterium	1
GO:0071963	0.00278756856228415	Inf	0.105645462799765	2	2	establishment or maintenance of cell polarity regulating cell shape	1
GO:0099554	0.00278756856228415	Inf	0.105645462799765	2	2	trans-synaptic signaling by soluble gas, modulating synaptic transmission	1
GO:0099555	0.00278756856228415	Inf	0.105645462799765	2	2	trans-synaptic signaling by nitric oxide, modulating synaptic transmission	1
GO:0032487	0.000564637318702	53.9543610547667	0.21129092559953	3	4	regulation of Rap protein signal transduction	0.75
GO:2000097	0.000564637318702	53.9543610547667	0.21129092559953	3	4	regulation of smooth muscle cell-matrix adhesion	0.75
GO:0003150	0.00806877585714523	35.9331306990881	0.158468194199647	2	3	muscular septum morphogenesis	0.666666666666667
GO:0003340	0.00806877585714523	35.9331306990881	0.158468194199647	2	3	negative regulation of mesenchymal to epithelial transition involved in metanephros morphogenesis	0.666666666666667
GO:0010266	0.00806877585714523	35.9331306990881	0.158468194199647	2	3	response to vitamin B1	0.666666666666667
GO:0015722	0.00806877585714523	35.9331306990881	0.158468194199647	2	3	canalicular bile acid transport	0.666666666666667
GO:0030997	0.00806877585714523	35.9331306990881	0.158468194199647	2	3	regulation of centriole-centriole cohesion	0.666666666666667
GO:0042078	0.00806877585714523	35.9331306990881	0.158468194199647	2	3	germ-line stem cell division	0.666666666666667
GO:0046882	0.00806877585714523	35.9331306990881	0.158468194199647	2	3	negative regulation of follicle-stimulating hormone secretion	0.666666666666667
GO:0048133	0.00806877585714523	35.9331306990881	0.158468194199647	2	3	male germ-line stem cell asymmetric division	0.666666666666667
GO:0060168	0.00806877585714523	35.9331306990881	0.158468194199647	2	3	positive regulation of adenosine receptor signaling pathway	0.666666666666667
GO:0060278	0.00806877585714523	35.9331306990881	0.158468194199647	2	3	regulation of ovulation	0.666666666666667
GO:0060671	0.00806877585714523	35.9331306990881	0.158468194199647	2	3	epithelial cell differentiation involved in embryonic placenta development	0.666666666666667
GO:0060672	0.00806877585714523	35.9331306990881	0.158468194199647	2	3	epithelial cell morphogenesis involved in placental branching	0.666666666666667
GO:0070340	0.00806877585714523	35.9331306990881	0.158468194199647	2	3	detection of bacterial lipopeptide	0.666666666666667
GO:0071725	0.00806877585714523	35.9331306990881	0.158468194199647	2	3	response to triacyl bacterial lipopeptide	0.666666666666667
GO:0071727	0.00806877585714523	35.9331306990881	0.158468194199647	2	3	cellular response to triacyl bacterial lipopeptide	0.666666666666667
GO:0072338	0.00806877585714523	35.9331306990881	0.158468194199647	2	3	cellular lactam metabolic process	0.666666666666667
GO:0072717	0.00806877585714523	35.9331306990881	0.158468194199647	2	3	cellular response to actinomycin D	0.666666666666667
GO:0098722	0.00806877585714523	35.9331306990881	0.158468194199647	2	3	asymmetric stem cell division	0.666666666666667
GO:0098728	0.00806877585714523	35.9331306990881	0.158468194199647	2	3	germline stem cell asymmetric division	0.666666666666667
GO:0099163	0.00806877585714523	35.9331306990881	0.158468194199647	2	3	synaptic signaling by nitric oxide	0.666666666666667
GO:0099543	0.00806877585714523	35.9331306990881	0.158468194199647	2	3	trans-synaptic signaling by soluble gas	0.666666666666667
GO:0099548	0.00806877585714523	35.9331306990881	0.158468194199647	2	3	trans-synaptic signaling by nitric oxide	0.666666666666667
GO:1903012	0.00806877585714523	35.9331306990881	0.158468194199647	2	3	positive regulation of bone development	0.666666666666667
GO:1903984	0.00806877585714523	35.9331306990881	0.158468194199647	2	3	positive regulation of TRAIL-activated apoptotic signaling pathway	0.666666666666667
GO:1990502	0.00806877585714523	35.9331306990881	0.158468194199647	2	3	dense core granule maturation	0.666666666666667
GO:2000286	0.00806877585714523	35.9331306990881	0.158468194199647	2	3	receptor internalization involved in canonical Wnt signaling pathway	0.666666666666667
GO:1904491	1.99451450989726e-05	30.0321815718157	0.42258185119906	5	8	protein localization to ciliary transition zone	625
GO:0031581	0.00135598137954323	26.9756592292089	0.264113656999412	3	5	hemidesmosome assembly	0.6
GO:0051097	0.00135598137954323	26.9756592292089	0.264113656999412	3	5	negative regulation of helicase activity	0.6
GO:0098735	0.00135598137954323	26.9756592292089	0.264113656999412	3	5	positive regulation of the force of heart contraction	0.6
GO:2001205	0.00135598137954323	26.9756592292089	0.264113656999412	3	5	negative regulation of osteoclast development	0.6
GO:0061302	0.00260541266554571	17.9827586206897	0.316936388399295	3	6	smooth muscle cell-matrix adhesion	0.5
GO:0002074	0.0155729143955885	17.9655521783181	0.21129092559953	2	4	extraocular skeletal muscle development	0.5
GO:0014005	0.0155729143955885	17.9655521783181	0.21129092559953	2	4	microglia development	0.5
GO:0022009	0.0155729143955885	17.9655521783181	0.21129092559953	2	4	central nervous system vasculogenesis	0.5
GO:0030951	0.0155729143955885	17.9655521783181	0.21129092559953	2	4	establishment or maintenance of microtubule cytoskeleton polarity	0.5
GO:0032289	0.0155729143955885	17.9655521783181	0.21129092559953	2	4	central nervous system myelin formation	0.5
GO:0034343	0.0155729143955885	17.9655521783181	0.21129092559953	2	4	type III interferon production	0.5
GO:0034344	0.0155729143955885	17.9655521783181	0.21129092559953	2	4	regulation of type III interferon production	0.5
GO:0035063	0.0155729143955885	17.9655521783181	0.21129092559953	2	4	nuclear speck organization	0.5
GO:0035799	0.0155729143955885	17.9655521783181	0.21129092559953	2	4	ureter maturation	0.5
GO:0042360	0.0155729143955885	17.9655521783181	0.21129092559953	2	4	vitamin E metabolic process	0.5
GO:0060167	0.0155729143955885	17.9655521783181	0.21129092559953	2	4	regulation of adenosine receptor signaling pathway	0.5
GO:0060916	0.0155729143955885	17.9655521783181	0.21129092559953	2	4	mesenchymal cell proliferation involved in lung development	0.5
GO:0060935	0.0155729143955885	17.9655521783181	0.21129092559953	2	4	cardiac fibroblast cell differentiation	0.5
GO:0060936	0.0155729143955885	17.9655521783181	0.21129092559953	2	4	cardiac fibroblast cell development	0.5
GO:0060938	0.0155729143955885	17.9655521783181	0.21129092559953	2	4	epicardium-derived cardiac fibroblast cell differentiation	0.5
GO:0060939	0.0155729143955885	17.9655521783181	0.21129092559953	2	4	epicardium-derived cardiac fibroblast cell development	0.5
GO:0061792	0.0155729143955885	17.9655521783181	0.21129092559953	2	4	secretory granule maturation	0.5
GO:0071881	0.0155729143955885	17.9655521783181	0.21129092559953	2	4	adenylate cyclase-inhibiting adrenergic receptor signaling pathway	0.5
GO:0072716	0.0155729143955885	17.9655521783181	0.21129092559953	2	4	response to actinomycin D	0.5
GO:0090669	0.0155729143955885	17.9655521783181	0.21129092559953	2	4	telomerase RNA stabilization	0.5
GO:0097368	0.0155729143955885	17.9655521783181	0.21129092559953	2	4	establishment of Sertoli cell barrier	0.5
GO:0097752	0.0155729143955885	17.9655521783181	0.21129092559953	2	4	regulation of DNA stability	0.5
GO:0120229	0.0155729143955885	17.9655521783181	0.21129092559953	2	4	protein localization to motile cilium	0.5
GO:1902685	0.0155729143955885	17.9655521783181	0.21129092559953	2	4	positive regulation of receptor localization to synapse	0.5
GO:1903553	0.0155729143955885	17.9655521783181	0.21129092559953	2	4	positive regulation of extracellular exosome assembly	0.5
GO:1904823	0.0155729143955885	17.9655521783181	0.21129092559953	2	4	purine nucleobase transmembrane transport	0.5
GO:1990258	0.0155729143955885	17.9655521783181	0.21129092559953	2	4	histone glutamine methylation	0.5
GO:2000015	0.0155729143955885	17.9655521783181	0.21129092559953	2	4	regulation of determination of dorsal identity	0.5
GO:0060670	2.66422725900696e-05	15.4573463159425	0.686695508198472	6	13	branching involved in labyrinthine layer morphogenesis	0.461538461538462
GO:0070944	0.000143956947748115	15.0135501355014	0.581050045398708	5	11	neutrophil-mediated killing of bacterium	0.454545454545455
GO:0031622	0.00438083069184078	13.48630831643	0.369759119799177	3	7	positive regulation of fever generation	0.428571428571429
GO:0034141	0.00438083069184078	13.48630831643	0.369759119799177	3	7	positive regulation of toll-like receptor 3 signaling pathway	0.428571428571429
GO:0035900	0.00438083069184078	13.48630831643	0.369759119799177	3	7	response to isolation stress	0.428571428571429
GO:0060087	0.00438083069184078	13.48630831643	0.369759119799177	3	7	relaxation of vascular associated smooth muscle	0.428571428571429
GO:0071494	0.00438083069184078	13.48630831643	0.369759119799177	3	7	cellular response to UV-C	0.428571428571429
GO:1903010	0.00438083069184078	13.48630831643	0.369759119799177	3	7	regulation of bone development	0.428571428571429
GO:0070943	0.000236056188611184	12.868031358885	0.63387277679859	5	12	neutrophil-mediated killing of symbiont cell	0.416666666666667
GO:0044557	0.00125734199299114	11.9986463620981	0.528227313998825	4	10	relaxation of smooth muscle	0.4
GO:1904526	0.00125734199299114	11.9986463620981	0.528227313998825	4	10	regulation of microtubule binding	0.4
GO:2000601	0.00125734199299114	11.9986463620981	0.528227313998825	4	10	positive regulation of Arp2/3 complex-mediated actin nucleation	0.4
GO:0001999	0.0250508697396186	11.9763593380615	0.264113656999412	2	5	renal response to blood flow involved in circulatory renin-angiotensin regulation of systemic arterial blood pressure	0.4
GO:0002001	0.0250508697396186	11.9763593380615	0.264113656999412	2	5	renin secretion into blood stream	0.4
GO:0002238	0.0250508697396186	11.9763593380615	0.264113656999412	2	5	response to molecule of fungal origin	0.4
GO:0002309	0.0250508697396186	11.9763593380615	0.264113656999412	2	5	T cell proliferation involved in immune response	0.4
GO:0009608	0.0250508697396186	11.9763593380615	0.264113656999412	2	5	response to symbiont	0.4
GO:0009609	0.0250508697396186	11.9763593380615	0.264113656999412	2	5	response to symbiotic bacterium	0.4
GO:0010750	0.0250508697396186	11.9763593380615	0.264113656999412	2	5	positive regulation of nitric oxide mediated signal transduction	0.4
GO:0014063	0.0250508697396186	11.9763593380615	0.264113656999412	2	5	negative regulation of serotonin secretion	0.4
GO:0015855	0.0250508697396186	11.9763593380615	0.264113656999412	2	5	pyrimidine nucleobase transport	0.4
GO:0032762	0.0250508697396186	11.9763593380615	0.264113656999412	2	5	mast cell cytokine production	0.4
GO:0032763	0.0250508697396186	11.9763593380615	0.264113656999412	2	5	regulation of mast cell cytokine production	0.4
GO:0034158	0.0250508697396186	11.9763593380615	0.264113656999412	2	5	toll-like receptor 8 signaling pathway	0.4
GO:0036149	0.0250508697396186	11.9763593380615	0.264113656999412	2	5	phosphatidylinositol acyl-chain remodeling	0.4
GO:0036476	0.0250508697396186	11.9763593380615	0.264113656999412	2	5	neuron death in response to hydrogen peroxide	0.4
GO:0042494	0.0250508697396186	11.9763593380615	0.264113656999412	2	5	detection of bacterial lipoprotein	0.4
GO:0043400	0.0250508697396186	11.9763593380615	0.264113656999412	2	5	cortisol secretion	0.4
GO:0046069	0.0250508697396186	11.9763593380615	0.264113656999412	2	5	cGMP catabolic process	0.4
GO:0046880	0.0250508697396186	11.9763593380615	0.264113656999412	2	5	regulation of follicle-stimulating hormone secretion	0.4
GO:0046881	0.0250508697396186	11.9763593380615	0.264113656999412	2	5	positive regulation of follicle-stimulating hormone secretion	0.4
GO:0051462	0.0250508697396186	11.9763593380615	0.264113656999412	2	5	regulation of cortisol secretion	0.4
GO:0060509	0.0250508697396186	11.9763593380615	0.264113656999412	2	5	type I pneumocyte differentiation	0.4
GO:0061966	0.0250508697396186	11.9763593380615	0.264113656999412	2	5	establishment of left/right asymmetry	0.4
GO:0062176	0.0250508697396186	11.9763593380615	0.264113656999412	2	5	R-loop disassembly	0.4
GO:0070487	0.0250508697396186	11.9763593380615	0.264113656999412	2	5	monocyte aggregation	0.4
GO:0071650	0.0250508697396186	11.9763593380615	0.264113656999412	2	5	negative regulation of chemokine (C-C motif) ligand 5 production	0.4
GO:0071680	0.0250508697396186	11.9763593380615	0.264113656999412	2	5	response to indole-3-methanol	0.4
GO:0071681	0.0250508697396186	11.9763593380615	0.264113656999412	2	5	cellular response to indole-3-methanol	0.4
GO:0071878	0.0250508697396186	11.9763593380615	0.264113656999412	2	5	negative regulation of adenylate cyclase-activating adrenergic receptor signaling pathway	0.4
GO:0072656	0.0250508697396186	11.9763593380615	0.264113656999412	2	5	maintenance of protein location in mitochondrion	0.4
GO:1901896	0.0250508697396186	11.9763593380615	0.264113656999412	2	5	positive regulation of ATPase-coupled calcium transmembrane transporter activity	0.4
GO:1903207	0.0250508697396186	11.9763593380615	0.264113656999412	2	5	regulation of hydrogen peroxide-induced neuron death	0.4
GO:1903208	0.0250508697396186	11.9763593380615	0.264113656999412	2	5	negative regulation of hydrogen peroxide-induced neuron death	0.4
GO:1904970	0.0250508697396186	11.9763593380615	0.264113656999412	2	5	brush border assembly	0.4
GO:1905024	0.0250508697396186	11.9763593380615	0.264113656999412	2	5	regulation of membrane repolarization during ventricular cardiac muscle cell action potential	0.4
GO:2000697	0.0250508697396186	11.9763593380615	0.264113656999412	2	5	negative regulation of epithelial cell differentiation involved in kidney development	0.4
GO:0001973	0.000366939886124382	11.2588922764228	0.686695508198472	5	13	G protein-coupled adenosine receptor signaling pathway	0.384615384615385
GO:0035588	0.000366939886124382	11.2588922764228	0.686695508198472	5	13	G protein-coupled purinergic receptor signaling pathway	0.384615384615385
GO:0034139	0.0067354698374219	10.7884381338742	0.42258185119906	3	8	regulation of toll-like receptor 3 signaling pathway	375
GO:0051045	0.0067354698374219	10.7884381338742	0.42258185119906	3	8	negative regulation of membrane protein ectodomain proteolysis	375
GO:0090400	0.0067354698374219	10.7884381338742	0.42258185119906	3	8	stress-induced premature senescence	375
GO:0090650	0.0067354698374219	10.7884381338742	0.42258185119906	3	8	cellular response to oxygen-glucose deprivation	375
GO:1902965	0.0067354698374219	10.7884381338742	0.42258185119906	3	8	regulation of protein localization to early endosome	375
GO:1902966	0.0067354698374219	10.7884381338742	0.42258185119906	3	8	positive regulation of protein localization to early endosome	375
GO:0070942	0.00054605133863074	10.0073396567299	0.739518239598355	5	14	neutrophil mediated cytotoxicity	0.357142857142857
GO:0032486	0.000783618856613816	9.00609756097561	0.792340970998237	5	15	Rap protein signal transduction	0.333333333333333
GO:0051127	0.000783618856613816	9.00609756097561	0.792340970998237	5	15	positive regulation of actin nucleation	0.333333333333333
GO:0033540	0.00272231493396085	8.99796954314721	0.63387277679859	4	12	fatty acid beta-oxidation using acyl-CoA oxidase	0.333333333333333
GO:0034145	0.00272231493396085	8.99796954314721	0.63387277679859	4	12	positive regulation of toll-like receptor 4 signaling pathway	0.333333333333333
GO:0090557	0.00272231493396085	8.99796954314721	0.63387277679859	4	12	establishment of endothelial intestinal barrier	0.333333333333333
GO:2001204	0.00272231493396085	8.99796954314721	0.63387277679859	4	12	regulation of osteoclast development	0.333333333333333
GO:0006924	0.00970958310927215	8.98985801217039	0.475404582598942	3	9	activation-induced cell death of T cells	0.333333333333333
GO:0031620	0.00970958310927215	8.98985801217039	0.475404582598942	3	9	regulation of fever generation	0.333333333333333
GO:0046602	0.00970958310927215	8.98985801217039	0.475404582598942	3	9	regulation of mitotic centrosome separation	0.333333333333333
GO:1900244	0.00970958310927215	8.98985801217039	0.475404582598942	3	9	positive regulation of synaptic vesicle endocytosis	0.333333333333333
GO:1903431	0.00970958310927215	8.98985801217039	0.475404582598942	3	9	positive regulation of cell maturation	0.333333333333333
GO:1990314	0.00970958310927215	8.98985801217039	0.475404582598942	3	9	cellular response to insulin-like growth factor stimulus	0.333333333333333
GO:2000833	0.00970958310927215	8.98985801217039	0.475404582598942	3	9	positive regulation of steroid hormone secretion	0.333333333333333
GO:0006030	0.0362735982766551	8.98176291793313	0.316936388399295	2	6	chitin metabolic process	0.333333333333333
GO:0006032	0.0362735982766551	8.98176291793313	0.316936388399295	2	6	chitin catabolic process	0.333333333333333
GO:0006561	0.0362735982766551	8.98176291793313	0.316936388399295	2	6	proline biosynthetic process	0.333333333333333
GO:0009136	0.0362735982766551	8.98176291793313	0.316936388399295	2	6	purine nucleoside diphosphate biosynthetic process	0.333333333333333
GO:0009180	0.0362735982766551	8.98176291793313	0.316936388399295	2	6	purine ribonucleoside diphosphate biosynthetic process	0.333333333333333
GO:0009597	0.0362735982766551	8.98176291793313	0.316936388399295	2	6	detection of virus	0.333333333333333
GO:0014004	0.0362735982766551	8.98176291793313	0.316936388399295	2	6	microglia differentiation	0.333333333333333
GO:0018364	0.0362735982766551	8.98176291793313	0.316936388399295	2	6	peptidyl-glutamine methylation	0.333333333333333
GO:0032278	0.0362735982766551	8.98176291793313	0.316936388399295	2	6	positive regulation of gonadotropin secretion	0.333333333333333
GO:0032741	0.0362735982766551	8.98176291793313	0.316936388399295	2	6	positive regulation of interleukin-18 production	0.333333333333333
GO:0035744	0.0362735982766551	8.98176291793313	0.316936388399295	2	6	T-helper 1 cell cytokine production	0.333333333333333
GO:0035965	0.0362735982766551	8.98176291793313	0.316936388399295	2	6	cardiolipin acyl-chain remodeling	0.333333333333333
GO:0036438	0.0362735982766551	8.98176291793313	0.316936388399295	2	6	maintenance of lens transparency	0.333333333333333
GO:0043504	0.0362735982766551	8.98176291793313	0.316936388399295	2	6	mitochondrial DNA repair	0.333333333333333
GO:0045162	0.0362735982766551	8.98176291793313	0.316936388399295	2	6	clustering of voltage-gated sodium channels	0.333333333333333
GO:0050904	0.0362735982766551	8.98176291793313	0.316936388399295	2	6	diapedesis	0.333333333333333
GO:0051572	0.0362735982766551	8.98176291793313	0.316936388399295	2	6	negative regulation of histone H3-K4 methylation	0.333333333333333
GO:0055129	0.0362735982766551	8.98176291793313	0.316936388399295	2	6	L-proline biosynthetic process	0.333333333333333
GO:0060440	0.0362735982766551	8.98176291793313	0.316936388399295	2	6	trachea formation	0.333333333333333
GO:0060770	0.0362735982766551	8.98176291793313	0.316936388399295	2	6	negative regulation of epithelial cell proliferation involved in prostate gland development	0.333333333333333
GO:0062100	0.0362735982766551	8.98176291793313	0.316936388399295	2	6	positive regulation of programmed necrotic cell death	0.333333333333333
GO:0070945	0.0362735982766551	8.98176291793313	0.316936388399295	2	6	neutrophil-mediated killing of gram-negative bacterium	0.333333333333333
GO:0071321	0.0362735982766551	8.98176291793313	0.316936388399295	2	6	cellular response to cGMP	0.333333333333333
GO:0071455	0.0362735982766551	8.98176291793313	0.316936388399295	2	6	cellular response to hyperoxia	0.333333333333333
GO:0086029	0.0362735982766551	8.98176291793313	0.316936388399295	2	6	Purkinje myocyte to ventricular cardiac muscle cell signaling	0.333333333333333
GO:0086068	0.0362735982766551	8.98176291793313	0.316936388399295	2	6	Purkinje myocyte to ventricular cardiac muscle cell communication	0.333333333333333
GO:0097187	0.0362735982766551	8.98176291793313	0.316936388399295	2	6	dentinogenesis	0.333333333333333
GO:0097350	0.0362735982766551	8.98176291793313	0.316936388399295	2	6	neutrophil clearance	0.333333333333333
GO:0120188	0.0362735982766551	8.98176291793313	0.316936388399295	2	6	regulation of bile acid secretion	0.333333333333333
GO:1901490	0.0362735982766551	8.98176291793313	0.316936388399295	2	6	regulation of lymphangiogenesis	0.333333333333333
GO:1901727	0.0362735982766551	8.98176291793313	0.316936388399295	2	6	positive regulation of histone deacetylase activity	0.333333333333333
GO:1902803	0.0362735982766551	8.98176291793313	0.316936388399295	2	6	regulation of synaptic vesicle transport	0.333333333333333
GO:1903026	0.0362735982766551	8.98176291793313	0.316936388399295	2	6	negative regulation of RNA polymerase II regulatory region sequence-specific DNA binding	0.333333333333333
GO:1903121	0.0362735982766551	8.98176291793313	0.316936388399295	2	6	regulation of TRAIL-activated apoptotic signaling pathway	0.333333333333333
GO:1903147	0.0362735982766551	8.98176291793313	0.316936388399295	2	6	negative regulation of autophagy of mitochondrion	0.333333333333333
GO:1903232	0.0362735982766551	8.98176291793313	0.316936388399295	2	6	melanosome assembly	0.333333333333333
GO:1903551	0.0362735982766551	8.98176291793313	0.316936388399295	2	6	regulation of extracellular exosome assembly	0.333333333333333
GO:1904798	0.0362735982766551	8.98176291793313	0.316936388399295	2	6	positive regulation of core promoter binding	0.333333333333333
GO:2000554	0.0362735982766551	8.98176291793313	0.316936388399295	2	6	regulation of T-helper 1 cell cytokine production	0.333333333333333
GO:2000556	0.0362735982766551	8.98176291793313	0.316936388399295	2	6	positive regulation of T-helper 1 cell cytokine production	0.333333333333333
GO:0031065	0.000320367760966045	8.32036935597465	1.00363189659777	6	19	positive regulation of histone deacetylation	0.315789473684211
GO:0032494	0.00376914828855484	7.99774393683023	0.686695508198472	4	13	response to peptidoglycan	0.307692307692308
GO:0045741	0.00376914828855484	7.99774393683023	0.686695508198472	4	13	positive regulation of epidermal growth factor-activated receptor activity	0.307692307692308
GO:0001553	0.0133319721591069	7.70515792523906	0.528227313998825	3	10	luteinization	0.3
GO:0006560	0.0133319721591069	7.70515792523906	0.528227313998825	3	10	proline metabolic process	0.3
GO:0035907	0.0133319721591069	7.70515792523906	0.528227313998825	3	10	dorsal aorta development	0.3
GO:0060768	0.0133319721591069	7.70515792523906	0.528227313998825	3	10	regulation of epithelial cell proliferation involved in prostate gland development	0.3
GO:0098903	0.0133319721591069	7.70515792523906	0.528227313998825	3	10	regulation of membrane repolarization during action potential	0.3
GO:1902946	0.0133319721591069	7.70515792523906	0.528227313998825	3	10	protein localization to early endosome	0.3
GO:2000253	0.0133319721591069	7.70515792523906	0.528227313998825	3	10	positive regulation of feeding behavior	0.3
GO:0043117	0.00147823166527732	7.50423441734417	0.897986433798002	5	17	positive regulation of vascular permeability	0.294117647058824
GO:0002755	0.000175933296068146	7.42895651132143	1.26774555359718	7	24	MyD88-dependent toll-like receptor signaling pathway	0.291666666666667
GO:0007100	0.00505838706852448	7.19756345177665	0.739518239598355	4	14	mitotic centrosome separation	0.285714285714286
GO:0031650	0.00505838706852448	7.19756345177665	0.739518239598355	4	14	regulation of heat generation	0.285714285714286
GO:0001878	0.0490307053105808	7.18500506585613	0.369759119799177	2	7	response to yeast	0.285714285714286
GO:0002317	0.0490307053105808	7.18500506585613	0.369759119799177	2	7	plasma cell differentiation	0.285714285714286
GO:0003010	0.0490307053105808	7.18500506585613	0.369759119799177	2	7	voluntary skeletal muscle contraction	0.285714285714286
GO:0006564	0.0490307053105808	7.18500506585613	0.369759119799177	2	7	L-serine biosynthetic process	0.285714285714286
GO:0006627	0.0490307053105808	7.18500506585613	0.369759119799177	2	7	protein processing involved in protein targeting to mitochondrion	0.285714285714286
GO:0008063	0.0490307053105808	7.18500506585613	0.369759119799177	2	7	Toll signaling pathway	0.285714285714286
GO:0009188	0.0490307053105808	7.18500506585613	0.369759119799177	2	7	ribonucleoside diphosphate biosynthetic process	0.285714285714286
GO:0014721	0.0490307053105808	7.18500506585613	0.369759119799177	2	7	twitch skeletal muscle contraction	0.285714285714286
GO:0014827	0.0490307053105808	7.18500506585613	0.369759119799177	2	7	intestine smooth muscle contraction	0.285714285714286
GO:0030952	0.0490307053105808	7.18500506585613	0.369759119799177	2	7	establishment or maintenance of cytoskeleton polarity	0.285714285714286
GO:0032747	0.0490307053105808	7.18500506585613	0.369759119799177	2	7	positive regulation of interleukin-23 production	0.285714285714286
GO:0033129	0.0490307053105808	7.18500506585613	0.369759119799177	2	7	positive regulation of histone phosphorylation	0.285714285714286
GO:0034137	0.0490307053105808	7.18500506585613	0.369759119799177	2	7	positive regulation of toll-like receptor 2 signaling pathway	0.285714285714286
GO:0035726	0.0490307053105808	7.18500506585613	0.369759119799177	2	7	common myeloid progenitor cell proliferation	0.285714285714286
GO:0038165	0.0490307053105808	7.18500506585613	0.369759119799177	2	7	oncostatin-M-mediated signaling pathway	0.285714285714286
GO:0040009	0.0490307053105808	7.18500506585613	0.369759119799177	2	7	regulation of growth rate	0.285714285714286
GO:0045003	0.0490307053105808	7.18500506585613	0.369759119799177	2	7	double-strand break repair via synthesis-dependent strand annealing	0.285714285714286
GO:0045650	0.0490307053105808	7.18500506585613	0.369759119799177	2	7	negative regulation of macrophage differentiation	0.285714285714286
GO:0045760	0.0490307053105808	7.18500506585613	0.369759119799177	2	7	positive regulation of action potential	0.285714285714286
GO:0046719	0.0490307053105808	7.18500506585613	0.369759119799177	2	7	regulation by virus of viral protein levels in host cell	0.285714285714286
GO:0046884	0.0490307053105808	7.18500506585613	0.369759119799177	2	7	follicle-stimulating hormone secretion	0.285714285714286
GO:0048242	0.0490307053105808	7.18500506585613	0.369759119799177	2	7	epinephrine secretion	0.285714285714286
GO:0051124	0.0490307053105808	7.18500506585613	0.369759119799177	2	7	synaptic assembly at neuromuscular junction	0.285714285714286
GO:0070106	0.0490307053105808	7.18500506585613	0.369759119799177	2	7	interleukin-27-mediated signaling pathway	0.285714285714286
GO:0070305	0.0490307053105808	7.18500506585613	0.369759119799177	2	7	response to cGMP	0.285714285714286
GO:0071839	0.0490307053105808	7.18500506585613	0.369759119799177	2	7	apoptotic process in bone marrow cell	0.285714285714286
GO:0071971	0.0490307053105808	7.18500506585613	0.369759119799177	2	7	extracellular exosome assembly	0.285714285714286
GO:0072201	0.0490307053105808	7.18500506585613	0.369759119799177	2	7	negative regulation of mesenchymal cell proliferation	0.285714285714286
GO:0086036	0.0490307053105808	7.18500506585613	0.369759119799177	2	7	regulation of cardiac muscle cell membrane potential	0.285714285714286
GO:0090166	0.0490307053105808	7.18500506585613	0.369759119799177	2	7	Golgi disassembly	0.285714285714286
GO:0097577	0.0490307053105808	7.18500506585613	0.369759119799177	2	7	sequestering of iron ion	0.285714285714286
GO:1900028	0.0490307053105808	7.18500506585613	0.369759119799177	2	7	negative regulation of ruffle assembly	0.285714285714286
GO:1904796	0.0490307053105808	7.18500506585613	0.369759119799177	2	7	regulation of core promoter binding	0.285714285714286
GO:1905031	0.0490307053105808	7.18500506585613	0.369759119799177	2	7	regulation of membrane repolarization during cardiac muscle cell action potential	0.285714285714286
GO:1905276	0.0490307053105808	7.18500506585613	0.369759119799177	2	7	regulation of epithelial tube formation	0.285714285714286
GO:1905278	0.0490307053105808	7.18500506585613	0.369759119799177	2	7	positive regulation of epithelial tube formation	0.285714285714286
GO:1905279	0.0490307053105808	7.18500506585613	0.369759119799177	2	7	regulation of retrograde transport, endosome to Golgi	0.285714285714286
GO:1905598	0.0490307053105808	7.18500506585613	0.369759119799177	2	7	negative regulation of low-density lipoprotein receptor activity	0.285714285714286
GO:1990144	0.0490307053105808	7.18500506585613	0.369759119799177	2	7	intrinsic apoptotic signaling pathway in response to hypoxia	0.285714285714286
GO:1990834	0.0490307053105808	7.18500506585613	0.369759119799177	2	7	response to odorant	0.285714285714286
GO:2000638	0.0490307053105808	7.18500506585613	0.369759119799177	2	7	regulation of SREBP signaling pathway	0.285714285714286
GO:2000646	0.0490307053105808	7.18500506585613	0.369759119799177	2	7	positive regulation of receptor catabolic process	0.285714285714286
GO:2000848	0.0490307053105808	7.18500506585613	0.369759119799177	2	7	positive regulation of corticosteroid hormone secretion	0.285714285714286
GO:0034340	3.19914735344742e-08	6.92683404296971	3.06371842119318	16	58	response to type I interferon	0.275862068965517
GO:0060713	0.000768819063917369	6.75915564598169	1.16210009079742	6	22	labyrinthine layer morphogenesis	0.272727272727273
GO:0001660	0.0176213759617053	6.74163286004057	0.581050045398708	3	11	fever generation	0.272727272727273
GO:0031652	0.0176213759617053	6.74163286004057	0.581050045398708	3	11	positive regulation of heat generation	0.272727272727273
GO:0035457	0.0176213759617053	6.74163286004057	0.581050045398708	3	11	cellular response to interferon-alpha	0.272727272727273
GO:0039530	0.0176213759617053	6.74163286004057	0.581050045398708	3	11	MDA-5 signaling pathway	0.272727272727273
GO:0051573	0.0176213759617053	6.74163286004057	0.581050045398708	3	11	negative regulation of histone H3-K9 methylation	0.272727272727273
GO:0060767	0.0176213759617053	6.74163286004057	0.581050045398708	3	11	epithelial cell proliferation involved in prostate gland development	0.272727272727273
GO:0070314	0.0176213759617053	6.74163286004057	0.581050045398708	3	11	G1 to G0 transition	0.272727272727273
GO:0071313	0.0176213759617053	6.74163286004057	0.581050045398708	3	11	cellular response to caffeine	0.272727272727273
GO:0090649	0.0176213759617053	6.74163286004057	0.581050045398708	3	11	response to oxygen-glucose deprivation	0.272727272727273
GO:0090657	0.0176213759617053	6.74163286004057	0.581050045398708	3	11	telomeric loop disassembly	0.272727272727273
GO:0099550	0.0176213759617053	6.74163286004057	0.581050045398708	3	11	trans-synaptic signaling, modulating synaptic transmission	0.272727272727273
GO:0140042	0.0176213759617053	6.74163286004057	0.581050045398708	3	11	lipid droplet formation	0.272727272727273
GO:1903423	0.0176213759617053	6.74163286004057	0.581050045398708	3	11	positive regulation of synaptic vesicle recycling	0.272727272727273
GO:1905668	0.0176213759617053	6.74163286004057	0.581050045398708	3	11	positive regulation of protein localization to endosome	0.272727272727273
GO:1990440	0.0176213759617053	6.74163286004057	0.581050045398708	3	11	positive regulation of transcription from RNA polymerase II promoter in response to endoplasmic reticulum stress	0.272727272727273
GO:0045986	0.006612848236492	6.5428703276419	0.792340970998237	4	15	negative regulation of smooth muscle contraction	0.266666666666667
GO:0051299	0.006612848236492	6.5428703276419	0.792340970998237	4	15	centrosome separation	0.266666666666667
GO:0006977	0.00254361515840228	6.431475029036	1.00363189659777	5	19	DNA damage response, signal transduction by p53 class mediator resulting in cell cycle arrest	0.263157894736842
GO:0008356	0.00254361515840228	6.431475029036	1.00363189659777	5	19	asymmetric cell division	0.263157894736842
GO:0035994	0.000994094413158228	6.36119921010113	1.2149228221973	6	23	response to muscle stretch	0.260869565217391
GO:0001958	0.000392835283143278	6.31354378818737	1.42621374779683	7	27	endochondral ossification	0.259259259259259
GO:0036075	0.000392835283143278	6.31354378818737	1.42621374779683	7	27	replacement ossification	0.259259259259259
GO:0071480	0.000156496939316143	6.27966139254532	1.63750467339636	8	31	cellular response to gamma radiation	0.258064516129032
GO:0071357	2.13653968928404e-06	6.04337431693989	2.74678203279389	13	52	cellular response to type I interferon	0.25
GO:0034123	0.000500109319993718	6.01255940257977	1.47903647919671	7	28	positive regulation of toll-like receptor signaling pathway	0.25
GO:0071397	0.00324570996668873	6.00237127371274	1.05645462799765	5	20	cellular response to cholesterol	0.25
GO:0090201	0.00324570996668873	6.00237127371274	1.05645462799765	5	20	negative regulation of release of cytochrome c from mitochondria	0.25
GO:0001991	0.00845361924888562	5.99729272419628	0.84516370239812	4	16	regulation of systemic arterial blood pressure by circulatory renin-angiotensin	0.25
GO:0006978	0.00845361924888562	5.99729272419628	0.84516370239812	4	16	DNA damage response, signal transduction by p53 class mediator resulting in transcription of p21 class mediator	0.25
GO:0051770	0.00845361924888562	5.99729272419628	0.84516370239812	4	16	positive regulation of nitric-oxide synthase biosynthetic process	0.25
GO:0032490	0.0225877296376202	5.9922244759973	0.63387277679859	3	12	detection of molecule of bacterial origin	0.25
GO:0032621	0.0225877296376202	5.9922244759973	0.63387277679859	3	12	interleukin-18 production	0.25
GO:0032661	0.0225877296376202	5.9922244759973	0.63387277679859	3	12	regulation of interleukin-18 production	0.25
GO:0032782	0.0225877296376202	5.9922244759973	0.63387277679859	3	12	bile acid secretion	0.25
GO:0033629	0.0225877296376202	5.9922244759973	0.63387277679859	3	12	negative regulation of cell adhesion mediated by integrin	0.25
GO:0043476	0.0225877296376202	5.9922244759973	0.63387277679859	3	12	pigment accumulation	0.25
GO:0043482	0.0225877296376202	5.9922244759973	0.63387277679859	3	12	cellular pigment accumulation	0.25
GO:0051095	0.0225877296376202	5.9922244759973	0.63387277679859	3	12	regulation of helicase activity	0.25
GO:0060009	0.0225877296376202	5.9922244759973	0.63387277679859	3	12	Sertoli cell development	0.25
GO:0098911	0.0225877296376202	5.9922244759973	0.63387277679859	3	12	regulation of ventricular cardiac muscle cell action potential	0.25
GO:1905666	0.0225877296376202	5.9922244759973	0.63387277679859	3	12	regulation of protein localization to endosome	0.25
GO:0060337	8.30890417864979e-06	5.71976512417174	2.64113656999412	12	50	type I interferon signaling pathway	0.24
GO:0090312	0.00159319401436565	5.69095679177598	1.32056828499706	6	25	positive regulation of protein deacetylation	0.24
GO:0035020	0.00407715531690179	5.62690548780488	1.10927735939753	5	21	regulation of Rac protein signal transduction	0.238095238095238
GO:0035455	0.00407715531690179	5.62690548780488	1.10927735939753	5	21	response to interferon-alpha	0.238095238095238
GO:0070269	0.00407715531690179	5.62690548780488	1.10927735939753	5	21	pyroptosis	0.238095238095238
GO:1903429	0.00407715531690179	5.62690548780488	1.10927735939753	5	21	regulation of cell maturation	0.238095238095238
GO:0098751	0.000312831015305211	5.55414412295146	1.795972867596	8	34	bone cell development	0.235294117647059
GO:0008340	0.0105998923515344	5.53565013666536	0.897986433798002	4	17	determination of adult lifespan	0.235294117647059
GO:0035855	0.0105998923515344	5.53565013666536	0.897986433798002	4	17	megakaryocyte development	0.235294117647059
GO:0036035	0.0105998923515344	5.53565013666536	0.897986433798002	4	17	osteoclast development	0.235294117647059
GO:0042772	0.0105998923515344	5.53565013666536	0.897986433798002	4	17	DNA damage response, signal transduction resulting in transcription	0.235294117647059
GO:0046068	0.0105998923515344	5.53565013666536	0.897986433798002	4	17	cGMP metabolic process	0.235294117647059
GO:0090399	0.0105998923515344	5.53565013666536	0.897986433798002	4	17	replicative senescence	0.235294117647059
GO:1903541	0.0105998923515344	5.53565013666536	0.897986433798002	4	17	regulation of exosomal secretion	0.235294117647059
GO:0060669	0.00197971984861078	5.40610376398779	1.37339101639694	6	26	embryonic placenta morphogenesis	0.230769230769231
GO:0010745	0.0282333040423398	5.39269776876268	0.686695508198472	3	13	negative regulation of macrophage derived foam cell differentiation	0.230769230769231
GO:0016024	0.0282333040423398	5.39269776876268	0.686695508198472	3	13	CDP-diacylglycerol biosynthetic process	0.230769230769231
GO:0021819	0.0282333040423398	5.39269776876268	0.686695508198472	3	13	layer formation in cerebral cortex	0.230769230769231
GO:0034982	0.0282333040423398	5.39269776876268	0.686695508198472	3	13	mitochondrial protein processing	0.230769230769231
GO:0051709	0.0282333040423398	5.39269776876268	0.686695508198472	3	13	regulation of killing of cells of other organism	0.230769230769231
GO:0051988	0.0282333040423398	5.39269776876268	0.686695508198472	3	13	regulation of attachment of spindle microtubules to kinetochore	0.230769230769231
GO:0060340	0.0282333040423398	5.39269776876268	0.686695508198472	3	13	positive regulation of type I interferon-mediated signaling pathway	0.230769230769231
GO:1902043	0.0282333040423398	5.39269776876268	0.686695508198472	3	13	positive regulation of extrinsic apoptotic signaling pathway via death domain receptors	0.230769230769231
GO:0032727	0.00505019539130896	5.29561214729794	1.16210009079742	5	22	positive regulation of interferon-alpha production	0.227272727272727
GO:0070723	0.000967028441022937	5.26009843856076	1.63750467339636	7	31	response to cholesterol	0.225806451612903
GO:0060338	0.000474703983868187	5.1568370467453	1.90161833039577	8	36	regulation of type I interferon-mediated signaling pathway	0.222222222222222
GO:0001946	0.0130688472937402	5.1399564902103	0.950809165197885	4	18	lymphangiogenesis	0.222222222222222
GO:0031649	0.0130688472937402	5.1399564902103	0.950809165197885	4	18	heat generation	0.222222222222222
GO:0071360	0.0130688472937402	5.1399564902103	0.950809165197885	4	18	cellular response to exogenous dsRNA	0.222222222222222
GO:0035456	0.00118205431362425	5.04940936863544	1.69032740479624	7	32	response to interferon-beta	0.21875
GO:0035929	0.00617689010746195	5.00112917795845	1.2149228221973	5	23	steroid hormone secretion	0.217391304347826
GO:0045932	0.00617689010746195	5.00112917795845	1.2149228221973	5	23	negative regulation of muscle contraction	0.217391304347826
GO:0010332	2.85174131291443e-05	4.93812226667907	2.95807295839342	12	56	response to gamma radiation	0.214285714285714
GO:0045071	2.85174131291443e-05	4.93812226667907	2.95807295839342	12	56	negative regulation of viral genome replication	0.214285714285714
GO:0010575	0.00296029892567633	4.91408489780819	1.47903647919671	6	28	positive regulation of vascular endothelial growth factor production	0.214285714285714
GO:0032607	0.00296029892567633	4.91408489780819	1.47903647919671	6	28	interferon-alpha production	0.214285714285714
GO:0032647	0.00296029892567633	4.91408489780819	1.47903647919671	6	28	regulation of interferon-alpha production	0.214285714285714
GO:0045671	0.00296029892567633	4.91408489780819	1.47903647919671	6	28	negative regulation of osteoclast differentiation	0.214285714285714
GO:0002091	0.0345537359442894	4.9021759173889	0.739518239598355	3	14	negative regulation of receptor internalization	0.214285714285714
GO:0002467	0.0345537359442894	4.9021759173889	0.739518239598355	3	14	germinal center formation	0.214285714285714
GO:0030213	0.0345537359442894	4.9021759173889	0.739518239598355	3	14	hyaluronan biosynthetic process	0.214285714285714
GO:0030948	0.0345537359442894	4.9021759173889	0.739518239598355	3	14	negative regulation of vascular endothelial growth factor receptor signaling pathway	0.214285714285714
GO:0036295	0.0345537359442894	4.9021759173889	0.739518239598355	3	14	cellular response to increased oxygen levels	0.214285714285714
GO:0042921	0.0345537359442894	4.9021759173889	0.739518239598355	3	14	glucocorticoid receptor signaling pathway	0.214285714285714
GO:0043951	0.0345537359442894	4.9021759173889	0.739518239598355	3	14	negative regulation of cAMP-mediated signaling	0.214285714285714
GO:0046341	0.0345537359442894	4.9021759173889	0.739518239598355	3	14	CDP-diacylglycerol metabolic process	0.214285714285714
GO:0046348	0.0345537359442894	4.9021759173889	0.739518239598355	3	14	amino sugar catabolic process	0.214285714285714
GO:0071236	0.0345537359442894	4.9021759173889	0.739518239598355	3	14	cellular response to antibiotic	0.214285714285714
GO:0071415	0.0345537359442894	4.9021759173889	0.739518239598355	3	14	cellular response to purine-containing compound	0.214285714285714
GO:0086103	0.0345537359442894	4.9021759173889	0.739518239598355	3	14	G protein-coupled receptor signaling pathway involved in heart process	0.214285714285714
GO:1902036	0.0345537359442894	4.9021759173889	0.739518239598355	3	14	regulation of hematopoietic stem cell differentiation	0.214285714285714
GO:1902187	0.0345537359442894	4.9021759173889	0.739518239598355	3	14	negative regulation of viral release from host cell	0.214285714285714
GO:0001774	0.000140094971762962	4.88556994174972	2.48266837579448	10	47	microglial cell activation	0.212765957446809
GO:0030947	0.00143279733205083	4.85492715024283	1.74315013619612	7	33	regulation of vascular endothelial growth factor receptor signaling pathway	0.212121212121212
GO:0002281	0.0158755758631637	4.79702199661591	1.00363189659777	4	19	macrophage activation involved in immune response	0.210526315789474
GO:0032695	0.0158755758631637	4.79702199661591	1.00363189659777	4	19	negative regulation of interleukin-12 production	0.210526315789474
GO:1903204	0.0158755758631637	4.79702199661591	1.00363189659777	4	19	negative regulation of oxidative stress-induced neuron death	0.210526315789474
GO:2000831	0.0158755758631637	4.79702199661591	1.00363189659777	4	19	regulation of steroid hormone secretion	0.210526315789474
GO:0032731	1.71082284403454e-05	4.80731431917029	3.27500934679271	13	62	positive regulation of interleukin-1 beta production	0.209677419354839
GO:0032757	1.71082284403454e-05	4.80731431917029	3.27500934679271	13	62	positive regulation of interleukin-8 production	0.209677419354839
GO:0021801	0.0074690151921831	4.73764441591784	1.26774555359718	5	24	cerebral cortex radial glia-guided migration	0.208333333333333
GO:0022030	0.0074690151921831	4.73764441591784	1.26774555359718	5	24	telencephalon glial cell migration	0.208333333333333
GO:0035458	0.0074690151921831	4.73764441591784	1.26774555359718	5	24	cellular response to interferon-beta	0.208333333333333
GO:0051043	0.0074690151921831	4.73764441591784	1.26774555359718	5	24	regulation of membrane protein ectodomain proteolysis	0.208333333333333
GO:0002862	0.00356834169408709	4.70016365164315	1.53185921059659	6	29	negative regulation of inflammatory response to antigenic stimulus	0.206896551724138
GO:0051873	0.00356834169408709	4.70016365164315	1.53185921059659	6	29	killing by host of symbiont cells	0.206896551724138
GO:0051883	0.00356834169408709	4.70016365164315	1.53185921059659	6	29	killing of cells in other organism involved in symbiotic interaction	0.206896551724138
GO:0032728	0.000838690376335872	4.65699911216336	2.06008652459542	8	39	positive regulation of interferon-beta production	0.205128205128205
GO:0006953	0.000202013930053104	4.63450407270632	2.58831383859424	10	49	acute-phase response	0.204081632653061
GO:0031663	5.88158615100307e-05	4.52558853633572	3.16936388399295	12	60	lipopolysaccharide-mediated signaling pathway	0.2
GO:0007176	0.00426442581793337	4.50406917599186	1.58468194199647	6	30	regulation of epidermal growth factor-activated receptor activity	0.2
GO:0046825	0.00426442581793337	4.50406917599186	1.58468194199647	6	30	regulation of protein export from nucleus	0.2
GO:0051125	0.00426442581793337	4.50406917599186	1.58468194199647	6	30	regulation of actin nucleation	0.2
GO:0070498	0.00426442581793337	4.50406917599186	1.58468194199647	6	30	interleukin-1-mediated signaling pathway	0.2
GO:0031664	0.00893797048663747	4.5005081300813	1.32056828499706	5	25	regulation of lipopolysaccharide-mediated signaling pathway	0.2
GO:0036315	0.00893797048663747	4.5005081300813	1.32056828499706	5	25	cellular response to sterol	0.2
GO:0042730	0.00893797048663747	4.5005081300813	1.32056828499706	5	25	fibrinolysis	0.2
GO:0042832	0.00893797048663747	4.5005081300813	1.32056828499706	5	25	defense response to protozoan	0.2
GO:0046835	0.00893797048663747	4.5005081300813	1.32056828499706	5	25	carbohydrate phosphorylation	0.2
GO:0003159	0.0190330423372824	4.49695431472081	1.05645462799765	4	20	morphogenesis of an endothelium	0.2
GO:0032332	0.0190330423372824	4.49695431472081	1.05645462799765	4	20	positive regulation of chondrocyte differentiation	0.2
GO:0032930	0.0190330423372824	4.49695431472081	1.05645462799765	4	20	positive regulation of superoxide anion generation	0.2
GO:0060252	0.0190330423372824	4.49695431472081	1.05645462799765	4	20	positive regulation of glial cell proliferation	0.2
GO:0061154	0.0190330423372824	4.49695431472081	1.05645462799765	4	20	endothelial tube morphogenesis	0.2
GO:1903206	0.0190330423372824	4.49695431472081	1.05645462799765	4	20	negative regulation of hydrogen peroxide-induced cell death	0.2
GO:1990182	0.0190330423372824	4.49695431472081	1.05645462799765	4	20	exosomal secretion	0.2
GO:0001325	0.0415389578712387	4.49340770791075	0.792340970998237	3	15	formation of extrachromosomal circular DNA	0.2
GO:0002070	0.0415389578712387	4.49340770791075	0.792340970998237	3	15	epithelial cell maturation	0.2
GO:0006098	0.0415389578712387	4.49340770791075	0.792340970998237	3	15	pentose-phosphate shunt	0.2
GO:0006684	0.0415389578712387	4.49340770791075	0.792340970998237	3	15	sphingomyelin metabolic process	0.2
GO:0006825	0.0415389578712387	4.49340770791075	0.792340970998237	3	15	copper ion transport	0.2
GO:0006878	0.0415389578712387	4.49340770791075	0.792340970998237	3	15	cellular copper ion homeostasis	0.2
GO:0010940	0.0415389578712387	4.49340770791075	0.792340970998237	3	15	positive regulation of necrotic cell death	0.2
GO:0031958	0.0415389578712387	4.49340770791075	0.792340970998237	3	15	corticosteroid receptor signaling pathway	0.2
GO:0043518	0.0415389578712387	4.49340770791075	0.792340970998237	3	15	negative regulation of DNA damage response, signal transduction by p53 class mediator	0.2
GO:0044406	0.0415389578712387	4.49340770791075	0.792340970998237	3	15	adhesion of symbiont to host	0.2
GO:0045176	0.0415389578712387	4.49340770791075	0.792340970998237	3	15	apical protein localization	0.2
GO:0048308	0.0415389578712387	4.49340770791075	0.792340970998237	3	15	organelle inheritance	0.2
GO:0048313	0.0415389578712387	4.49340770791075	0.792340970998237	3	15	Golgi inheritance	0.2
GO:0090656	0.0415389578712387	4.49340770791075	0.792340970998237	3	15	t-circle formation	0.2
GO:0090737	0.0415389578712387	4.49340770791075	0.792340970998237	3	15	telomere maintenance via telomere trimming	0.2
GO:0140374	0.0415389578712387	4.49340770791075	0.792340970998237	3	15	antiviral innate immune response	0.2
GO:1903543	0.0415389578712387	4.49340770791075	0.792340970998237	3	15	positive regulation of exosomal secretion	0.2
GO:1905146	0.0415389578712387	4.49340770791075	0.792340970998237	3	15	lysosomal protein catabolic process	0.2
GO:2000650	0.0415389578712387	4.49340770791075	0.792340970998237	3	15	negative regulation of sodium ion transmembrane transporter activity	0.2
GO:0061028	0.000580506701900139	4.39252619966906	2.42984564439459	9	46	establishment of endothelial barrier	0.195652173913043
GO:0033627	2.03443191128229e-05	4.37602122015915	3.80323666079154	14	72	cell adhesion mediated by integrin	0.194444444444444
GO:0036314	0.00243920016012735	4.3519558957792	1.90161833039577	7	36	response to sterol	0.194444444444444
GO:0044060	0.00243920016012735	4.3519558957792	1.90161833039577	7	36	regulation of endocrine process	0.194444444444444
GO:0002230	0.00505580118839186	4.32366225839268	1.63750467339636	6	31	positive regulation of defense response to virus by host	0.193548387096774
GO:0031063	0.00505580118839186	4.32366225839268	1.63750467339636	6	31	regulation of histone deacetylation	0.193548387096774
GO:0036475	0.00505580118839186	4.32366225839268	1.63750467339636	6	31	neuron death in response to oxidative stress	0.193548387096774
GO:1902042	0.00505580118839186	4.32366225839268	1.63750467339636	6	31	negative regulation of extrinsic apoptotic signaling pathway via death domain receptors	0.193548387096774
GO:0001562	0.0105946968290248	4.28595625241967	1.37339101639694	5	26	response to protozoan	0.192307692307692
GO:0001573	0.0105946968290248	4.28595625241967	1.37339101639694	5	26	ganglioside metabolic process	0.192307692307692
GO:0034643	0.0105946968290248	4.28595625241967	1.37339101639694	5	26	establishment of mitochondrion localization, microtubule-mediated	0.192307692307692
GO:0047497	0.0105946968290248	4.28595625241967	1.37339101639694	5	26	mitochondrion transport along microtubule	0.192307692307692
GO:0016601	0.00139862368218606	4.24536787191941	2.21855471879506	8	42	Rac protein signal transduction	0.19047619047619
GO:0022010	0.0225520745773719	4.23218871304867	1.10927735939753	4	21	central nervous system myelination	0.19047619047619
GO:0032291	0.0225520745773719	4.23218871304867	1.10927735939753	4	21	axon ensheathment in central nervous system	0.19047619047619
GO:0034315	0.0225520745773719	4.23218871304867	1.10927735939753	4	21	regulation of Arp2/3 complex-mediated actin nucleation	0.19047619047619
GO:0046597	0.0225520745773719	4.23218871304867	1.10927735939753	4	21	negative regulation of viral entry into host cell	0.19047619047619
GO:0051767	0.0225520745773719	4.23218871304867	1.10927735939753	4	21	nitric-oxide synthase biosynthetic process	0.19047619047619
GO:0051769	0.0225520745773719	4.23218871304867	1.10927735939753	4	21	regulation of nitric-oxide synthase biosynthetic process	0.19047619047619
GO:0070584	0.0225520745773719	4.23218871304867	1.10927735939753	4	21	mitochondrion morphogenesis	0.19047619047619
GO:0097062	0.0225520745773719	4.23218871304867	1.10927735939753	4	21	dendritic spine maintenance	0.19047619047619
GO:0097734	0.0225520745773719	4.23218871304867	1.10927735939753	4	21	extracellular exosome biogenesis	0.19047619047619
GO:2000178	0.0225520745773719	4.23218871304867	1.10927735939753	4	21	negative regulation of neural precursor cell proliferation	0.19047619047619
GO:2001238	0.000803923114455479	4.16679748822606	2.53549110719436	9	48	positive regulation of extrinsic apoptotic signaling pathway	0.1875
GO:0001574	0.0491740360148586	4.14752691527539	0.84516370239812	3	16	ganglioside biosynthetic process	0.1875
GO:0002693	0.0491740360148586	4.14752691527539	0.84516370239812	3	16	positive regulation of cellular extravasation	0.1875
GO:0002713	0.0491740360148586	4.14752691527539	0.84516370239812	3	16	negative regulation of B cell mediated immunity	0.1875
GO:0002890	0.0491740360148586	4.14752691527539	0.84516370239812	3	16	negative regulation of immunoglobulin mediated immune response	0.1875
GO:0002921	0.0491740360148586	4.14752691527539	0.84516370239812	3	16	negative regulation of humoral immune response	0.1875
GO:0006544	0.0491740360148586	4.14752691527539	0.84516370239812	3	16	glycine metabolic process	0.1875
GO:0006740	0.0491740360148586	4.14752691527539	0.84516370239812	3	16	NADPH regeneration	0.1875
GO:0010225	0.0491740360148586	4.14752691527539	0.84516370239812	3	16	response to UV-C	0.1875
GO:0030575	0.0491740360148586	4.14752691527539	0.84516370239812	3	16	nuclear body organization	0.1875
GO:0030949	0.0491740360148586	4.14752691527539	0.84516370239812	3	16	positive regulation of vascular endothelial growth factor receptor signaling pathway	0.1875
GO:0033631	0.0491740360148586	4.14752691527539	0.84516370239812	3	16	cell-cell adhesion mediated by integrin	0.1875
GO:0034116	0.0491740360148586	4.14752691527539	0.84516370239812	3	16	positive regulation of heterotypic cell-cell adhesion	0.1875
GO:0034138	0.0491740360148586	4.14752691527539	0.84516370239812	3	16	toll-like receptor 3 signaling pathway	0.1875
GO:0050862	0.0491740360148586	4.14752691527539	0.84516370239812	3	16	positive regulation of T cell receptor signaling pathway	0.1875
GO:0051014	0.0491740360148586	4.14752691527539	0.84516370239812	3	16	actin filament severing	0.1875
GO:0070230	0.0491740360148586	4.14752691527539	0.84516370239812	3	16	positive regulation of lymphocyte apoptotic process	0.1875
GO:0071639	0.0491740360148586	4.14752691527539	0.84516370239812	3	16	positive regulation of monocyte chemotactic protein-1 production	0.1875
GO:0072283	0.0491740360148586	4.14752691527539	0.84516370239812	3	16	metanephric renal vesicle morphogenesis	0.1875
GO:0097202	0.0491740360148586	4.14752691527539	0.84516370239812	3	16	activation of cysteine-type endopeptidase activity	0.1875
GO:0098884	0.0491740360148586	4.14752691527539	0.84516370239812	3	16	postsynaptic neurotransmitter receptor internalization	0.1875
GO:0140239	0.0491740360148586	4.14752691527539	0.84516370239812	3	16	postsynaptic endocytosis	0.1875
GO:1902306	0.0491740360148586	4.14752691527539	0.84516370239812	3	16	negative regulation of sodium ion transmembrane transport	0.1875
GO:2000846	0.0491740360148586	4.14752691527539	0.84516370239812	3	16	regulation of corticosteroid hormone secretion	0.1875
GO:0007026	0.0124496016904521	4.09090909090909	1.42621374779683	5	27	negative regulation of microtubule depolymerization	0.185185185185185
GO:0060333	0.0124496016904521	4.09090909090909	1.42621374779683	5	27	interferon-gamma-mediated signaling pathway	0.185185185185185
GO:0098901	0.0124496016904521	4.09090909090909	1.42621374779683	5	27	regulation of cardiac muscle cell action potential	0.185185185185185
GO:1903203	0.0124496016904521	4.09090909090909	1.42621374779683	5	27	regulation of oxidative stress-induced neuron death	0.185185185185185
GO:1903205	0.0124496016904521	4.09090909090909	1.42621374779683	5	27	regulation of hydrogen peroxide-induced cell death	0.185185185185185
GO:0048525	5.61433277092884e-06	4.1180109739369	4.85969128878919	17	92	negative regulation of viral process	0.184782608695652
GO:0097242	0.00336460535942064	4.07072465672426	2.00726379319554	7	38	amyloid-beta clearance	0.184210526315789
GO:0002762	0.000939352680946013	4.06239795918367	2.58831383859424	9	49	negative regulation of myeloid leukocyte differentiation	0.183673469387755
GO:0010823	0.000939352680946013	4.06239795918367	2.58831383859424	9	49	negative regulation of mitochondrion organization	0.183673469387755
GO:1902041	0.000939352680946013	4.06239795918367	2.58831383859424	9	49	regulation of extrinsic apoptotic signaling pathway via death domain receptors	0.183673469387755
GO:0031638	0.00026731882537251	4.0594090396895	3.16936388399295	11	60	zymogen activation	0.183333333333333
GO:0098900	0.000539637305863833	4.01520826239927	2.90525022699354	10	55	regulation of action potential	0.181818181818182
GO:0062208	0.00191321216393916	4.0090610488164	2.32420018159483	8	44	positive regulation of pattern recognition receptor signaling pathway	0.181818181818182
GO:0071353	0.00695350842883801	4.00293884932746	1.74315013619612	6	33	cellular response to interleukin-4	0.181818181818182
GO:1902692	0.00695350842883801	4.00293884932746	1.74315013619612	6	33	regulation of neuroblast proliferation	0.181818181818182
GO:1903146	0.00695350842883801	4.00293884932746	1.74315013619612	6	33	regulation of autophagy of mitochondrion	0.181818181818182
GO:0031281	0.0264413810631637	3.99684151156232	1.16210009079742	4	22	positive regulation of cyclase activity	0.181818181818182
GO:0032069	0.0264413810631637	3.99684151156232	1.16210009079742	4	22	regulation of nuclease activity	0.181818181818182
GO:0046628	0.0264413810631637	3.99684151156232	1.16210009079742	4	22	positive regulation of insulin receptor signaling pathway	0.181818181818182
GO:0048169	0.0264413810631637	3.99684151156232	1.16210009079742	4	22	regulation of long-term neuronal synaptic plasticity	0.181818181818182
GO:0071359	0.0264413810631637	3.99684151156232	1.16210009079742	4	22	cellular response to dsRNA	0.181818181818182
GO:1901032	0.0264413810631637	3.99684151156232	1.16210009079742	4	22	negative regulation of response to reactive oxygen species	0.181818181818182
GO:2000773	0.0264413810631637	3.99684151156232	1.16210009079742	4	22	negative regulation of cellular senescence	0.181818181818182
GO:1902624	0.0145124935958382	3.91282255213856	1.47903647919671	5	28	positive regulation of neutrophil migration	0.178571428571429
GO:1903779	0.0145124935958382	3.91282255213856	1.47903647919671	5	28	regulation of cardiac conduction	0.178571428571429
GO:0032732	0.000103699550609941	3.92353142076503	3.85605939219142	13	73	positive regulation of interleukin-1 production	0.178082191780822
GO:0042551	0.00222102722120051	3.90048764360691	2.37702291299471	8	45	neuron maturation	0.177777777777778
GO:0002446	0.00807429759864781	3.85975875599477	1.795972867596	6	34	neutrophil mediated immunity	0.176470588235294
GO:0032212	0.00807429759864781	3.85975875599477	1.795972867596	6	34	positive regulation of telomere maintenance via telomerase	0.176470588235294
GO:0035590	0.00807429759864781	3.85975875599477	1.795972867596	6	34	purinergic nucleotide receptor signaling pathway	0.176470588235294
GO:0051973	0.00807429759864781	3.85975875599477	1.795972867596	6	34	positive regulation of telomerase activity	0.176470588235294
GO:0086004	0.00807429759864781	3.85975875599477	1.795972867596	6	34	regulation of cardiac muscle cell contraction	0.176470588235294
GO:0060760	0.000724196266299902	3.84391367656967	3.0108956897933	10	57	positive regulation of response to cytokine stimulus	0.175438596491228
GO:0070266	0.00453583475912976	3.82358205270629	2.1129092559953	7	40	necroptotic process	175
GO:0070059	0.000415711795364691	3.82456347333648	3.3278320781926	11	63	intrinsic apoptotic signaling pathway in response to endoplasmic reticulum stress	0.174603174603175
GO:0002052	0.0307075896854167	3.78626769970612	1.2149228221973	4	23	positive regulation of neuroblast proliferation	0.173913043478261
GO:0003081	0.0307075896854167	3.78626769970612	1.2149228221973	4	23	regulation of systemic arterial blood pressure by renin-angiotensin	0.173913043478261
GO:0006929	0.0307075896854167	3.78626769970612	1.2149228221973	4	23	substrate-dependent cell migration	0.173913043478261
GO:0036303	0.0307075896854167	3.78626769970612	1.2149228221973	4	23	lymph vessel morphogenesis	0.173913043478261
GO:0140112	0.0307075896854167	3.78626769970612	1.2149228221973	4	23	extracellular vesicle biogenesis	0.173913043478261
GO:0070301	1.35115299721593e-05	3.8116775897983	5.17662767718848	17	98	cellular response to hydrogen peroxide	0.173469387755102
GO:0032481	0.000834322338555003	3.76361933946204	3.06371842119318	10	58	positive regulation of type I interferon production	0.172413793103448
GO:0043525	0.000834322338555003	3.76361933946204	3.06371842119318	10	58	positive regulation of neuron apoptotic process	0.172413793103448
GO:0010955	0.0167925252420363	3.74957655826558	1.53185921059659	5	29	negative regulation of protein processing	0.172413793103448
GO:0051654	0.0167925252420363	3.74957655826558	1.53185921059659	5	29	establishment of mitochondrion localization	0.172413793103448
GO:1903318	0.0167925252420363	3.74957655826558	1.53185921059659	5	29	negative regulation of protein maturation	0.172413793103448
GO:0001885	0.00047840699771187	3.75218968244781	3.38065480959248	11	64	endothelial cell development	0.171875
GO:0086005	0.00931921128267397	3.72645315185744	1.84879559899589	6	35	ventricular cardiac muscle cell action potential	0.171428571428571
GO:0042542	1.78042439474868e-07	3.77494770412537	7.71211878438284	25	146	response to hydrogen peroxide	0.171232876712329
GO:0032091	3.06842010390647e-05	3.72224418267584	4.96533675158895	16	94	negative regulation of protein binding	0.170212765957447
GO:0051972	0.00295236616084584	3.70004443398939	2.48266837579448	8	47	regulation of telomerase activity	0.170212765957447
GO:2000772	0.00167780400068203	3.69225417439703	2.79960476419377	9	53	regulation of cellular senescence	0.169811320754717
GO:0001836	0.000957838472546286	3.68660232223635	3.11654115259307	10	59	release of cytochrome c from mitochondria	0.169491525423729
GO:0043407	0.000957838472546286	3.68660232223635	3.11654115259307	10	59	negative regulation of MAP kinase activity	0.169491525423729
GO:0048010	0.000957838472546286	3.68660232223635	3.11654115259307	10	59	vascular endothelial growth factor receptor signaling pathway	0.169491525423729
GO:0061515	0.000315393109412022	3.67954478427563	3.75041392939166	12	71	myeloid cell development	0.169014084507042
GO:0071479	0.000360571745746942	3.61801432958035	3.80323666079154	12	72	cellular response to ionizing radiation	0.166666666666667
GO:0033628	0.00338205477012391	3.60733944954128	2.53549110719436	8	48	regulation of cell adhesion mediated by integrin	0.166666666666667
GO:0090199	0.00338205477012391	3.60733944954128	2.53549110719436	8	48	regulation of release of cytochrome c from mitochondria	0.166666666666667
GO:0046596	0.00599080639776016	3.60468431771894	2.21855471879506	7	42	regulation of viral entry into host cell	0.166666666666667
GO:0051354	0.0106952135071833	3.60203458799593	1.90161833039577	6	36	negative regulation of oxidoreductase activity	0.166666666666667
GO:0070670	0.0106952135071833	3.60203458799593	1.90161833039577	6	36	response to interleukin-4	0.166666666666667
GO:0031571	0.0192981451268569	3.59939024390244	1.58468194199647	5	30	mitotic G1 DNA damage checkpoint signaling	0.166666666666667
GO:0060218	0.0192981451268569	3.59939024390244	1.58468194199647	5	30	hematopoietic stem cell differentiation	0.166666666666667
GO:0002438	0.0353553045840634	3.59675126903553	1.26774555359718	4	24	acute inflammatory response to antigenic stimulus	0.166666666666667
GO:0031639	0.0353553045840634	3.59675126903553	1.26774555359718	4	24	plasminogen activation	0.166666666666667
GO:0032928	0.0353553045840634	3.59675126903553	1.26774555359718	4	24	regulation of superoxide anion generation	0.166666666666667
GO:0048011	0.0353553045840634	3.59675126903553	1.26774555359718	4	24	neurotrophin TRK receptor signaling pathway	0.166666666666667
GO:0051156	0.0353553045840634	3.59675126903553	1.26774555359718	4	24	glucose 6-phosphate metabolic process	0.166666666666667
GO:0051570	0.0353553045840634	3.59675126903553	1.26774555359718	4	24	regulation of histone H3-K9 methylation	0.166666666666667
GO:0090023	0.0353553045840634	3.59675126903553	1.26774555359718	4	24	positive regulation of neutrophil chemotaxis	0.166666666666667
GO:0090343	0.0353553045840634	3.59675126903553	1.26774555359718	4	24	positive regulation of cell aging	0.166666666666667
GO:0098743	0.0353553045840634	3.59675126903553	1.26774555359718	4	24	cell aggregation	0.166666666666667
GO:0032760	2.64931341014026e-05	3.58905158388363	5.4407413341879	17	103	positive regulation of tumor necrosis factor production	0.16504854368932
GO:0034113	0.00124989469438244	3.54162911334094	3.22218661539283	10	61	heterotypic cell-cell adhesion	0.163934426229508
GO:0090342	0.00124989469438244	3.54162911334094	3.22218661539283	10	61	regulation of cell aging	0.163934426229508
GO:0010862	0.00385867956801228	3.5191566594565	2.58831383859424	8	49	positive regulation of pathway-restricted SMAD protein phosphorylation	0.163265306122449
GO:0052372	0.00385867956801228	3.5191566594565	2.58831383859424	8	49	modulation by symbiont of entry into host	0.163265306122449
GO:0002861	0.00683679265411782	3.50435618918307	2.27137745019495	7	43	regulation of inflammatory response to antigenic stimulus	0.162790697674419
GO:1904706	0.00683679265411782	3.50435618918307	2.27137745019495	7	43	negative regulation of vascular associated smooth muscle cell proliferation	0.162790697674419
GO:0045730	0.0122090945764408	3.48564302825452	1.95444106179565	6	37	respiratory burst	0.162162162162162
GO:1904358	0.0122090945764408	3.48564302825452	1.95444106179565	6	37	positive regulation of telomere maintenance via telomere lengthening	0.162162162162162
GO:0032755	0.000101933416871817	3.48602116569262	4.91251402018907	15	93	positive regulation of interleukin-6 production	0.161290322580645
GO:0090398	0.000101933416871817	3.48602116569262	4.91251402018907	15	93	cellular senescence	0.161290322580645
GO:0070265	0.001421018493442	3.47332442838061	3.27500934679271	10	62	necrotic cell death	0.161290322580645
GO:0030212	0.0220370574227156	3.46075672295184	1.63750467339636	5	31	hyaluronan metabolic process	0.161290322580645
GO:0031114	0.0220370574227156	3.46075672295184	1.63750467339636	5	31	regulation of microtubule depolymerization	0.161290322580645
GO:0036474	0.0220370574227156	3.46075672295184	1.63750467339636	5	31	cell death in response to hydrogen peroxide	0.161290322580645
GO:0044819	0.0220370574227156	3.46075672295184	1.63750467339636	5	31	mitotic G1/S transition checkpoint signaling	0.161290322580645
GO:1900027	0.0220370574227156	3.46075672295184	1.63750467339636	5	31	regulation of ruffle assembly	0.161290322580645
GO:0032608	0.00249056641857809	3.45599218410769	2.95807295839342	9	56	interferon-beta production	0.160714285714286
GO:0032648	0.00249056641857809	3.45599218410769	2.95807295839342	9	56	regulation of interferon-beta production	0.160714285714286
GO:0006910	6.68746385139006e-05	3.45519502765135	5.28227313998825	16	100	phagocytosis, recognition	0.16
GO:0051646	0.00438553025027347	3.43517304985195	2.64113656999412	8	50	mitochondrion localization	0.16
GO:0003094	0.040387177745478	3.42528402223834	1.32056828499706	4	25	glomerular filtration	0.16
GO:0016540	0.040387177745478	3.42528402223834	1.32056828499706	4	25	protein autoprocessing	0.16
GO:0031579	0.040387177745478	3.42528402223834	1.32056828499706	4	25	membrane raft organization	0.16
GO:0032469	0.040387177745478	3.42528402223834	1.32056828499706	4	25	endoplasmic reticulum calcium ion homeostasis	0.16
GO:0048143	0.040387177745478	3.42528402223834	1.32056828499706	4	25	astrocyte activation	0.16
GO:0050995	0.040387177745478	3.42528402223834	1.32056828499706	4	25	negative regulation of lipid catabolic process	0.16
GO:0051788	0.040387177745478	3.42528402223834	1.32056828499706	4	25	response to misfolded protein	0.16
GO:0086064	0.040387177745478	3.42528402223834	1.32056828499706	4	25	cell communication by electrical coupling involved in cardiac conduction	0.16
GO:0098581	0.040387177745478	3.42528402223834	1.32056828499706	4	25	detection of external biotic stimulus	0.16
GO:1900078	0.040387177745478	3.42528402223834	1.32056828499706	4	25	positive regulation of cellular response to insulin stimulus	0.16
GO:1903901	0.040387177745478	3.42528402223834	1.32056828499706	4	25	negative regulation of viral life cycle	0.16
GO:0031295	0.00776828085496241	3.40945120273023	2.32420018159483	7	44	T cell costimulation	0.159090909090909
GO:0042554	0.00776828085496241	3.40945120273023	2.32420018159483	7	44	superoxide anion generation	0.159090909090909
GO:0050999	0.00776828085496241	3.40945120273023	2.32420018159483	7	44	regulation of nitric-oxide synthase activity	0.159090909090909
GO:1903557	4.38724058928596e-05	3.42876085962506	5.65203225978743	17	107	positive regulation of tumor necrosis factor superfamily cytokine production	0.158878504672897
GO:0009595	0.0138674363046321	3.37652594099695	2.00726379319554	6	38	detection of biotic stimulus	0.157894736842105
GO:0046676	0.0138674363046321	3.37652594099695	2.00726379319554	6	38	negative regulation of insulin secretion	0.157894736842105
GO:2000279	0.0138674363046321	3.37652594099695	2.00726379319554	6	38	negative regulation of DNA biosynthetic process	0.157894736842105
GO:0006958	4.95484959044687e-05	3.39088997422331	5.70485499118731	17	108	complement activation, classical pathway	0.157407407407407
GO:0006940	0.00182038270710602	3.34430446789997	3.38065480959248	10	64	regulation of smooth muscle contraction	0.15625
GO:0019934	0.025016189764908	3.33239235170129	1.69032740479624	5	32	cGMP-mediated signaling	0.15625
GO:0021799	0.025016189764908	3.33239235170129	1.69032740479624	5	32	cerebral cortex radially oriented cell migration	0.15625
GO:0090140	0.025016189764908	3.33239235170129	1.69032740479624	5	32	regulation of mitochondrial fission	0.15625
GO:0048599	0.00879014336644489	3.31954121556437	2.37702291299471	7	45	oocyte development	0.155555555555556
GO:1904646	0.00879014336644489	3.31954121556437	2.37702291299471	7	45	cellular response to amyloid-beta	0.155555555555556
GO:2000273	0.00879014336644489	3.31954121556437	2.37702291299471	7	45	positive regulation of signaling receptor activity	0.155555555555556
GO:0006956	1.56775053974343e-05	3.30687681771273	6.86695508198472	20	130	complement activation	0.153846153846154
GO:0002218	0.00560339078632208	3.27865814104346	2.74678203279389	8	52	activation of innate immune response	0.153846153846154
GO:0032206	0.00560339078632208	3.27865814104346	2.74678203279389	8	52	positive regulation of telomere maintenance	0.153846153846154
GO:1903115	0.0156765794032978	3.27402201054287	2.06008652459542	6	39	regulation of actin filament-based movement	0.153846153846154
GO:0001556	0.0458039924575603	3.26940470696816	1.37339101639694	4	26	oocyte maturation	0.153846153846154
GO:0002026	0.0458039924575603	3.26940470696816	1.37339101639694	4	26	regulation of the force of heart contraction	0.153846153846154
GO:0010875	0.0458039924575603	3.26940470696816	1.37339101639694	4	26	positive regulation of cholesterol efflux	0.153846153846154
GO:0032682	0.0458039924575603	3.26940470696816	1.37339101639694	4	26	negative regulation of chemokine production	0.153846153846154
GO:0034114	0.0458039924575603	3.26940470696816	1.37339101639694	4	26	regulation of heterotypic cell-cell adhesion	0.153846153846154
GO:0097205	0.0458039924575603	3.26940470696816	1.37339101639694	4	26	renal filtration	0.153846153846154
GO:1900017	0.0458039924575603	3.26940470696816	1.37339101639694	4	26	positive regulation of cytokine production involved in inflammatory response	0.153846153846154
GO:1901071	0.0458039924575603	3.26940470696816	1.37339101639694	4	26	glucosamine-containing compound metabolic process	0.153846153846154
GO:1904353	0.0458039924575603	3.26940470696816	1.37339101639694	4	26	regulation of telomere capping	0.153846153846154
GO:1905523	0.0458039924575603	3.26940470696816	1.37339101639694	4	26	positive regulation of macrophage migration	0.153846153846154
GO:0045069	0.000494783734085476	3.267389571949	4.48993216899001	13	85	regulation of viral genome replication	0.152941176470588
GO:0043903	0.00132424937050812	3.25862415769888	3.80323666079154	11	72	regulation of biological process involved in symbiotic interaction	0.152777777777778
GO:0090303	0.0035880137163935	3.24808163265306	3.11654115259307	9	59	positive regulation of wound healing	0.152542372881356
GO:0007019	0.00990722551594164	3.23424199697112	2.42984564439459	7	46	microtubule depolymerization	0.152173913043478
GO:0031294	0.00990722551594164	3.23424199697112	2.42984564439459	7	46	lymphocyte costimulation	0.152173913043478
GO:0055010	0.00990722551594164	3.23424199697112	2.42984564439459	7	46	ventricular cardiac muscle tissue morphogenesis	0.152173913043478
GO:0014068	0.000856672955682429	3.2387295864587	4.17299578059072	12	79	positive regulation of phosphatidylinositol 3-kinase signaling	0.151898734177215
GO:0007569	1.97309345156566e-05	3.24745687748784	6.97260054478449	20	132	cell aging	0.151515151515152
GO:0033209	0.000209177042414266	3.23591962452332	5.22945040858837	15	99	tumor necrosis factor-mediated signaling pathway	0.151515151515152
GO:0031116	0.0282416685749205	3.2131968641115	1.74315013619612	5	33	positive regulation of microtubule polymerization	0.151515151515152
GO:0032228	0.0282416685749205	3.2131968641115	1.74315013619612	5	33	regulation of synaptic transmission, GABAergic	0.151515151515152
GO:0045648	0.0282416685749205	3.2131968641115	1.74315013619612	5	33	positive regulation of erythrocyte differentiation	0.151515151515152
GO:0071539	0.0282416685749205	3.2131968641115	1.74315013619612	5	33	protein localization to centrosome	0.151515151515152
GO:0042116	0.000136231660349224	3.22375242663012	5.59920952838754	16	106	macrophage activation	0.150943396226415
GO:0032210	0.00630127288154699	3.20561785026617	2.79960476419377	8	53	regulation of telomere maintenance via telomerase	0.150943396226415
GO:1903202	0.00630127288154699	3.20561785026617	2.79960476419377	8	53	negative regulation of oxidative stress-induced cell death	0.150943396226415
GO:0051865	0.00148625903641416	3.20588429315918	3.85605939219142	11	73	protein autoubiquitination	0.150684931506849
GO:0031111	0.0176425931640333	3.17754772305667	2.1129092559953	6	40	negative regulation of microtubule polymerization or depolymerization	0.15
GO:0006911	3.78169311591882e-05	3.19677357770141	6.70848688778508	19	127	phagocytosis, engulfment	0.149606299212598
GO:0061041	2.47002293722176e-05	3.19012184744627	7.07824600758426	20	134	regulation of wound healing	0.149253731343284
GO:0043114	0.0111243259030834	3.15320773930754	2.48266837579448	7	47	regulation of vascular permeability	0.148936170212766
GO:0045601	0.0111243259030834	3.15320773930754	2.48266837579448	7	47	regulation of endothelial cell differentiation	0.148936170212766
GO:0046677	0.0111243259030834	3.15320773930754	2.48266837579448	7	47	response to antibiotic	0.148936170212766
GO:0097300	0.0111243259030834	3.15320773930754	2.48266837579448	7	47	programmed necrotic cell death	0.148936170212766
GO:0002455	6.47556938149402e-05	3.17316748822653	6.39155049938578	18	121	humoral immune response mediated by circulating immunoglobulin	0.148760330578512
GO:0002687	2.75824101106291e-05	3.16220218064342	7.13106873898414	20	135	positive regulation of leukocyte migration	0.148148148148148
GO:0071260	0.00107423958388411	3.14449735214276	4.27864124339048	12	81	cellular response to mechanical stimulus	0.148148148148148
GO:0099024	3.07618131311445e-05	3.13476388740614	7.18389147038402	20	136	plasma membrane invagination	0.147058823529412
GO:0032743	0.0317188015018641	3.10222175497617	1.795972867596	5	34	positive regulation of interleukin-2 production	0.147058823529412
GO:0043516	0.0317188015018641	3.10222175497617	1.795972867596	5	34	regulation of DNA damage response, signal transduction by p53 class mediator	0.147058823529412
GO:0048261	0.0317188015018641	3.10222175497617	1.795972867596	5	34	negative regulation of receptor-mediated endocytosis	0.147058823529412
GO:0055094	0.0317188015018641	3.10222175497617	1.795972867596	5	34	response to lipoprotein particle	0.147058823529412
GO:0090075	0.0317188015018641	3.10222175497617	1.795972867596	5	34	relaxation of muscle	0.147058823529412
GO:0008088	0.00185902930322396	3.10534892638037	3.96170485499119	11	75	axo-dendritic transport	0.146666666666667
GO:0043627	0.00185902930322396	3.10534892638037	3.96170485499119	11	75	response to estrogen	0.146666666666667
GO:0050691	0.0197712475444109	3.08658625199826	2.16573198739518	6	41	regulation of defense response to virus by host	0.146341463414634
GO:1902622	0.0197712475444109	3.08658625199826	2.16573198739518	6	41	regulation of neutrophil migration	0.146341463414634
GO:2000008	0.0197712475444109	3.08658625199826	2.16573198739518	6	41	regulation of protein localization to cell surface	0.146341463414634
GO:0010821	2.23668632770098e-05	3.10615299334812	7.60647332158308	21	144	regulation of mitochondrion organization	0.145833333333333
GO:0032611	0.000211719715942972	3.0858717281494	5.81050045398707	16	110	interleukin-1 beta production	0.145454545454545
GO:0032651	0.000211719715942972	3.0858717281494	5.81050045398707	16	110	regulation of interleukin-1 beta production	0.145454545454545
GO:0061098	0.00789240646323352	3.06886156115124	2.90525022699354	8	55	positive regulation of protein tyrosine kinase activity	0.145454545454545
GO:0051092	1.62439423280351e-05	3.08080502744412	8.02905517278214	22	152	positive regulation of NF-kappaB transcription factor activity	0.144736842105263
GO:2000379	0.00207210779948857	3.05740128991663	4.01452758639107	11	76	positive regulation of reactive oxygen species metabolic process	0.144736842105263
GO:0050886	0.00133580533514916	3.05557397609814	4.38428670619025	12	83	endocrine process	0.144578313253012
GO:1904705	0.000863212649958466	3.05435650415159	4.75404582598942	13	90	regulation of vascular associated smooth muscle cell proliferation	0.144444444444444
GO:0045446	0.000153137221905766	3.05342663896019	6.23308230518613	17	118	endothelial cell differentiation	0.144067796610169
GO:0007596	4.36995354819815e-07	3.05288796102992	11.4625327137745	31	217	blood coagulation	0.142857142857143
GO:2001235	0.000110674376685107	3.02540336422932	6.65566415638519	18	126	positive regulation of apoptotic signaling pathway	0.142857142857143
GO:0002526	0.000261510684617475	3.02124015073655	5.91614591678684	16	112	acute inflammatory response	0.142857142857143
GO:1990874	0.000959372175192494	3.01502732240437	4.80686855738931	13	91	vascular associated smooth muscle cell proliferation	0.142857142857143
GO:0055117	0.00230460208343218	3.01090661213361	4.06735031779095	11	77	regulation of cardiac muscle contraction	0.142857142857143
GO:0060415	0.00358696048526839	3.00885257065032	3.69759119799177	10	70	muscle tissue morphogenesis	0.142857142857143
GO:0022029	0.00879271313734276	3.00475705062861	2.95807295839342	8	56	telencephalon cell migration	0.142857142857143
GO:0043388	0.00879271313734276	3.00475705062861	2.95807295839342	8	56	positive regulation of DNA binding	0.142857142857143
GO:0009994	0.0138774266561441	3.00271554650373	2.58831383859424	7	49	oocyte differentiation	0.142857142857143
GO:0038084	0.0138774266561441	3.00271554650373	2.58831383859424	7	49	vascular endothelial growth factor signaling pathway	0.142857142857143
GO:0045778	0.0138774266561441	3.00271554650373	2.58831383859424	7	49	positive regulation of ossification	0.142857142857143
GO:0060986	0.0138774266561441	3.00271554650373	2.58831383859424	7	49	endocrine hormone secretion	0.142857142857143
GO:1904707	0.0138774266561441	3.00271554650373	2.58831383859424	7	49	positive regulation of vascular associated smooth muscle cell proliferation	0.142857142857143
GO:0010939	0.0220679877355194	3.00067819599864	2.21855471879506	6	42	regulation of necrotic cell death	0.142857142857143
GO:0014003	0.0220679877355194	3.00067819599864	2.21855471879506	6	42	oligodendrocyte development	0.142857142857143
GO:0021795	0.0220679877355194	3.00067819599864	2.21855471879506	6	42	cerebral cortex cell migration	0.142857142857143
GO:0030574	0.0220679877355194	3.00067819599864	2.21855471879506	6	42	collagen catabolic process	0.142857142857143
GO:0032467	0.0220679877355194	3.00067819599864	2.21855471879506	6	42	positive regulation of cytokinesis	0.142857142857143
GO:0032689	0.0220679877355194	3.00067819599864	2.21855471879506	6	42	negative regulation of interferon-gamma production	0.142857142857143
GO:0033574	0.0220679877355194	3.00067819599864	2.21855471879506	6	42	response to testosterone	0.142857142857143
GO:0071312	0.0220679877355194	3.00067819599864	2.21855471879506	6	42	cellular response to alkaloid	0.142857142857143
GO:0045454	0.0354520665383957	2.99864498644986	1.84879559899589	5	35	cell redox homeostasis	0.142857142857143
GO:1905508	0.0354520665383957	2.99864498644986	1.84879559899589	5	35	protein localization to microtubule organizing center	0.142857142857143
GO:0071901	0.000188537286155484	2.99379719525351	6.3387277679859	17	120	negative regulation of protein serine/threonine kinase activity	0.141666666666667
GO:0031058	0.00106433595368941	2.97669381614443	4.85969128878919	13	92	positive regulation of histone modification	0.141304347826087
GO:0032722	0.00398203255752502	2.95935966777742	3.75041392939166	10	71	positive regulation of chemokine production	0.140845070422535
GO:0046888	0.00622226221398701	2.95196660482375	3.38065480959248	9	64	negative regulation of hormone secretion	0.140625
GO:0006611	0.00976756249492848	2.94326905073956	3.0108956897933	8	57	protein export from nucleus	0.140350877192982
GO:0030219	0.00976756249492848	2.94326905073956	3.0108956897933	8	57	megakaryocyte differentiation	0.140350877192982
GO:0007229	0.000494582751441567	2.9531961432015	5.65203225978743	15	107	integrin-mediated signaling pathway	0.14018691588785
GO:0001961	0.0154226190943091	2.93271917775778	2.64113656999412	7	50	positive regulation of cytokine-mediated signaling pathway	0.14
GO:0007632	0.0154226190943091	2.93271917775778	2.64113656999412	7	50	visual behavior	0.14
GO:0003158	9.78866897590412e-05	2.94936117719623	7.18389147038402	19	136	endothelium development	0.139705882352941
GO:0007599	7.24671652490028e-07	2.97212233164643	11.7266463707739	31	222	hemostasis	0.13963963963964
GO:0050817	7.24671652490028e-07	2.97212233164643	11.7266463707739	31	222	coagulation	0.13963963963964
GO:0034142	0.0245379112622331	2.91941381870171	2.27137745019495	6	43	toll-like receptor 4 signaling pathway	0.13953488372093
GO:0042771	0.0245379112622331	2.91941381870171	2.27137745019495	6	43	intrinsic apoptotic signaling pathway in response to DNA damage by p53 class mediator	0.13953488372093
GO:0046717	0.0245379112622331	2.91941381870171	2.27137745019495	6	43	acid secretion	0.13953488372093
GO:0090278	0.0245379112622331	2.91941381870171	2.27137745019495	6	43	negative regulation of peptide hormone secretion	0.13953488372093
GO:0140353	0.0245379112622331	2.91941381870171	2.27137745019495	6	43	lipid export from cell	0.13953488372093
GO:0010324	7.05036789595917e-05	2.93118945371018	7.60647332158308	20	144	membrane invagination	0.138888888888889
GO:0034446	0.000546875105669427	2.92127575014904	5.70485499118731	15	108	substrate adhesion-dependent cell spreading	0.138888888888889
GO:0038179	0.0394451073498816	2.90175059008655	1.90161833039577	5	36	neurotrophin signaling pathway	0.138888888888889
GO:0042119	0.0394451073498816	2.90175059008655	1.90161833039577	5	36	neutrophil activation	0.138888888888889
GO:0045742	0.0394451073498816	2.90175059008655	1.90161833039577	5	36	positive regulation of epidermal growth factor receptor signaling pathway	0.138888888888889
GO:0045746	0.0394451073498816	2.90175059008655	1.90161833039577	5	36	negative regulation of Notch signaling pathway	0.138888888888889
GO:0071402	0.0394451073498816	2.90175059008655	1.90161833039577	5	36	cellular response to lipoprotein particle stimulus	0.138888888888889
GO:0090313	0.0394451073498816	2.90175059008655	1.90161833039577	5	36	regulation of protein targeting to membrane	0.138888888888889
GO:0060389	0.00689255101584759	2.8990889212828	3.43347754099236	9	65	pathway-restricted SMAD protein phosphorylation	0.138461538461538
GO:0061512	0.00689255101584759	2.8990889212828	3.43347754099236	9	65	protein localization to cilium	0.138461538461538
GO:2000177	0.00201761421079295	2.89195496417605	4.59557763178978	12	87	regulation of neural precursor cell proliferation	0.137931034482759
GO:0035904	0.0108204844071405	2.88424057084608	3.06371842119318	8	58	aorta development	0.137931034482759
GO:2001244	0.0108204844071405	2.88424057084608	3.06371842119318	8	58	positive regulation of intrinsic apoptotic signaling pathway	0.137931034482759
GO:0043393	4.81303009854787e-06	2.91709210348264	10.353255354377	27	196	regulation of protein binding	0.137755102040816
GO:0032677	0.000931129743811863	2.8793006993007	5.38791860278802	14	102	regulation of interleukin-8 production	0.137254901960784
GO:0010874	0.0170861780140654	2.86590446213664	2.69395930139401	7	51	regulation of cholesterol efflux	0.137254901960784
GO:0001909	0.000281235473442289	2.88122572208761	6.55001869358543	17	124	leukocyte mediated cytotoxicity	0.137096774193548
GO:0007044	0.00143836009752881	2.86730307876849	5.01815948298884	13	95	cell-substrate junction assembly	0.136842105263158
GO:0036473	0.00143836009752881	2.86730307876849	5.01815948298884	13	95	cell death in response to oxidative stress	0.136842105263158
GO:0006939	0.000665721381058428	2.85945098886847	5.81050045398707	15	110	smooth muscle contraction	0.136363636363636
GO:0030193	0.00761676766676819	2.84806659505908	3.48630027239224	9	66	regulation of blood coagulation	0.136363636363636
GO:0002792	0.0271857476423285	2.84242651389409	2.32420018159483	6	44	negative regulation of peptide secretion	0.136363636363636
GO:0008542	0.0271857476423285	2.84242651389409	2.32420018159483	6	44	visual learning	0.136363636363636
GO:0060711	0.0271857476423285	2.84242651389409	2.32420018159483	6	44	labyrinthine layer development	0.136363636363636
GO:0032637	0.00102634201961088	2.84678766925958	5.4407413341879	14	103	interleukin-8 production	0.135922330097087
GO:0051100	4.43212103926814e-05	2.85912247008421	8.55728248678096	22	162	negative regulation of binding	0.135802469135802
GO:0060759	4.43212103926814e-05	2.85912247008421	8.55728248678096	22	162	regulation of response to cytokine stimulus	0.135802469135802
GO:0021885	0.0119549896135322	2.82752693330135	3.11654115259307	8	59	forebrain cell migration	0.135593220338983
GO:0010212	0.000103888111507701	2.83894478844169	7.81776424718261	20	148	response to ionizing radiation	0.135135135135135
GO:1903900	0.000103888111507701	2.83894478844169	7.81776424718261	20	148	regulation of viral life cycle	0.135135135135135
GO:0001938	0.000732947037949542	2.8295046201232	5.86332318538696	15	111	positive regulation of endothelial cell proliferation	0.135135135135135
GO:1903201	0.00537658744952649	2.8201608784474	3.9088821235913	10	74	regulation of oxidative stress-induced cell death	0.135135135135135
GO:0031112	0.0437007343457317	2.81091209349594	1.95444106179565	5	37	positive regulation of microtubule polymerization or depolymerization	0.135135135135135
GO:0040036	0.0437007343457317	2.81091209349594	1.95444106179565	5	37	regulation of fibroblast growth factor receptor signaling pathway	0.135135135135135
GO:0051567	0.0437007343457317	2.81091209349594	1.95444106179565	5	37	histone H3-K9 methylation	0.135135135135135
GO:0046330	0.0024526105099321	2.81652022491327	4.70122309458954	12	89	positive regulation of JNK cascade	0.134831460674157
GO:0010718	0.0188723893606033	2.802059289432	2.74678203279389	7	52	positive regulation of epithelial to mesenchymal transition	0.134615384615385
GO:0048260	0.0188723893606033	2.802059289432	2.74678203279389	7	52	positive regulation of receptor-mediated endocytosis	0.134615384615385
GO:0050792	5.35331398745983e-05	2.81853270606056	8.66292794958073	22	164	regulation of viral process	0.134146341463415
GO:0050729	0.000174864410265598	2.8045344061688	7.50082785878331	19	142	positive regulation of inflammatory response	0.133802816901408
GO:0045638	0.00269713325762035	2.78025352334462	4.75404582598942	12	90	negative regulation of myeloid cell differentiation	0.133333333333333
GO:0034121	0.00591775024126534	2.77661664178518	3.96170485499119	10	75	regulation of toll-like receptor signaling pathway	0.133333333333333
GO:0019731	0.0131745586298953	2.77299458950835	3.16936388399295	8	60	antibacterial humoral response	0.133333333333333
GO:0055008	0.0131745586298953	2.77299458950835	3.16936388399295	8	60	cardiac muscle tissue morphogenesis	0.133333333333333
GO:0006909	4.81497124951247e-08	2.82932331421167	16.2694012711638	41	308	phagocytosis	0.133116883116883
GO:0032612	0.000411145851465513	2.77676750824899	6.76130961918496	17	128	interleukin-1 production	0.1328125
GO:0032652	0.000411145851465513	2.77676750824899	6.76130961918496	17	128	regulation of interleukin-1 production	0.1328125
GO:0046785	0.0041813682628053	2.75906044080891	4.38428670619025	11	83	microtubule polymerization	0.132530120481928
GO:2001236	0.000137425540159453	2.77345811767857	7.97623244138226	20	151	regulation of extrinsic apoptotic signaling pathway	0.132450331125828
GO:0031640	0.00923770452427571	2.75121065375303	3.59194573519201	9	68	killing of cells of other organism	0.132352941176471
GO:1900046	0.00923770452427571	2.75121065375303	3.59194573519201	9	68	regulation of hemostasis	0.132352941176471
GO:2000278	0.00136238170055676	2.75348940914158	5.59920952838754	14	106	regulation of DNA biosynthetic process	0.132075471698113
GO:0008347	0.0207853853465466	2.74098999380147	2.79960476419377	7	53	glial cell migration	0.132075471698113
GO:1903034	7.05697972484615e-05	2.75974753057804	8.82139614378038	22	167	regulation of response to wounding	0.131736526946108
GO:0010742	0.0482209310186256	2.72557896033506	2.00726379319554	5	38	macrophage derived foam cell differentiation	0.131578947368421
GO:0032373	0.0482209310186256	2.72557896033506	2.00726379319554	5	38	positive regulation of sterol transport	0.131578947368421
GO:0032376	0.0482209310186256	2.72557896033506	2.00726379319554	5	38	positive regulation of cholesterol transport	0.131578947368421
GO:0035136	0.0482209310186256	2.72557896033506	2.00726379319554	5	38	forelimb morphogenesis	0.131578947368421
GO:0090077	0.0482209310186256	2.72557896033506	2.00726379319554	5	38	foam cell differentiation	0.131578947368421
GO:0098926	0.0482209310186256	2.72557896033506	2.00726379319554	5	38	postsynaptic signal transduction	0.131578947368421
GO:1901031	0.0482209310186256	2.72557896033506	2.00726379319554	5	38	regulation of response to reactive oxygen species	0.131578947368421
GO:1901186	0.0482209310186256	2.72557896033506	2.00726379319554	5	38	positive regulation of ERBB signaling pathway	0.131578947368421
GO:0030838	0.00210091730267056	2.73332062523828	5.22945040858837	13	99	positive regulation of actin filament polymerization	0.131313131313131
GO:0031341	0.00210091730267056	2.73332062523828	5.22945040858837	13	99	regulation of cell killing	0.131313131313131
GO:0032602	0.00210091730267056	2.73332062523828	5.22945040858837	13	99	chemokine production	0.131313131313131
GO:1904356	0.0144826307621638	2.72052007000942	3.22218661539283	8	61	regulation of telomere maintenance via telomere lengthening	0.131147540983607
GO:0000302	6.30928555177068e-06	2.74551489637306	11.7266463707739	29	222	response to reactive oxygen species	0.130630630630631
GO:0032273	0.000352512023485337	2.72100926879506	7.28953693318378	18	138	positive regulation of protein polymerization	0.130434782608696
GO:0001974	0.0330321328716352	2.7	2.42984564439459	6	46	blood vessel remodeling	0.130434782608696
GO:0034198	0.0330321328716352	2.7	2.42984564439459	6	46	cellular response to amino acid starvation	0.130434782608696
GO:2000107	0.0330321328716352	2.7	2.42984564439459	6	46	negative regulation of leukocyte apoptotic process	0.130434782608696
GO:0006937	8.44623941616719e-05	2.72189041076617	8.92704160658014	22	169	regulation of muscle contraction	0.130177514792899
GO:0048644	0.00712666531687322	2.69342765234095	4.06735031779095	10	77	muscle organ morphogenesis	0.12987012987013
GO:0006968	0.0228291292854706	2.68251939160203	2.85242749559366	7	54	cellular defense response	0.12962962962963
GO:0032330	0.0228291292854706	2.68251939160203	2.85242749559366	7	54	regulation of chondrocyte differentiation	0.12962962962963
GO:0060350	0.0228291292854706	2.68251939160203	2.85242749559366	7	54	endochondral bone morphogenesis	0.12962962962963
GO:2000179	0.0228291292854706	2.68251939160203	2.85242749559366	7	54	positive regulation of neural precursor cell proliferation	0.12962962962963
GO:0051591	0.00355181707728651	2.67682626331552	4.91251402018907	12	93	response to cAMP	0.129032258064516
GO:0032613	0.0158825932781985	2.66998905123268	3.27500934679271	8	62	interleukin-10 production	0.129032258064516
GO:0032653	0.0158825932781985	2.66998905123268	3.27500934679271	8	62	regulation of interleukin-10 production	0.129032258064516
GO:0045428	0.0158825932781985	2.66998905123268	3.27500934679271	8	62	regulation of nitric oxide biosynthetic process	0.129032258064516
GO:0048488	0.0158825932781985	2.66998905123268	3.27500934679271	8	62	synaptic vesicle endocytosis	0.129032258064516
GO:0060393	0.0158825932781985	2.66998905123268	3.27500934679271	8	62	regulation of pathway-restricted SMAD protein phosphorylation	0.129032258064516
GO:0140238	0.0158825932781985	2.66998905123268	3.27500934679271	8	62	presynaptic endocytosis	0.129032258064516
GO:0150115	0.00251615418431695	2.67089698211624	5.33509587138813	13	101	cell-substrate junction organization	0.128712871287129
GO:0061045	0.00779855986565834	2.65366820885658	4.12017304919083	10	78	negative regulation of wound healing	0.128205128205128
GO:0042060	1.53247239798723e-09	2.7254243199256	22.2911926507504	54	422	wound healing	0.127962085308057
GO:0045921	0.00549391351703761	2.64824812542604	4.54275490038989	11	86	positive regulation of exocytosis	0.127906976744186
GO:0048864	0.00549391351703761	2.64824812542604	4.54275490038989	11	86	stem cell development	0.127906976744186
GO:0010803	0.0362381534036183	2.63399746917103	2.48266837579448	6	47	regulation of tumor necrosis factor-mediated signaling pathway	0.127659574468085
GO:0042311	0.0362381534036183	2.63399746917103	2.48266837579448	6	47	vasodilation	0.127659574468085
GO:0032635	0.000167411449159277	2.65000860881543	8.71575068098061	21	165	interleukin-6 production	0.127272727272727
GO:0032675	0.000167411449159277	2.65000860881543	8.71575068098061	21	165	regulation of interleukin-6 production	0.127272727272727
GO:0003229	0.0250074013637135	2.62648506449423	2.90525022699354	7	55	ventricular cardiac muscle tissue development	0.127272727272727
GO:0031113	0.0250074013637135	2.62648506449423	2.90525022699354	7	55	regulation of microtubule polymerization	0.127272727272727
GO:0043331	0.0250074013637135	2.62648506449423	2.90525022699354	7	55	response to dsRNA	0.127272727272727
GO:0032640	8.56852947907596e-05	2.64858348402652	9.56091438337873	23	181	tumor necrosis factor production	0.12707182320442
GO:0032680	8.56852947907596e-05	2.64858348402652	9.56091438337873	23	181	regulation of tumor necrosis factor production	0.12707182320442
GO:0050818	0.0121408495430812	2.61764318630678	3.75041392939166	9	71	regulation of coagulation	0.126760563380282
GO:0001959	0.000357177758367326	2.63206893838042	7.92340970998237	19	150	regulation of cytokine-mediated signaling pathway	0.126666666666667
GO:0006942	0.00423402360305055	2.6120284618515	5.01815948298884	12	95	regulation of striated muscle contraction	0.126315789473684
GO:0032479	0.00423402360305055	2.6120284618515	5.01815948298884	12	95	regulation of type I interferon production	0.126315789473684
GO:0032606	0.00423402360305055	2.6120284618515	5.01815948298884	12	95	type I interferon production	0.126315789473684
GO:0071216	6.47406612686954e-06	2.63673835995533	12.9943919243711	31	246	cellular response to biotic stimulus	0.126016260162602
GO:0050871	0.000422845000099117	2.59219440353461	8.02905517278214	19	152	positive regulation of B cell activation	125
GO:0048661	0.0032629844099842	2.58240632318501	5.49356406558778	13	104	positive regulation of smooth muscle cell proliferation	125
GO:0031110	0.00653572069436011	2.57917031843412	4.64840036318966	11	88	regulation of microtubule polymerization or depolymerization	125
GO:0030330	0.0132451555827916	2.57594752186589	3.80323666079154	9	72	DNA damage response, signal transduction by p53 class mediator	125
GO:1903036	0.0132451555827916	2.57594752186589	3.80323666079154	9	72	positive regulation of response to wounding	125
GO:0030858	0.0189714148683365	2.57434105140527	3.38065480959248	8	64	positive regulation of epithelial cell differentiation	125
GO:0045670	0.0189714148683365	2.57434105140527	3.38065480959248	8	64	regulation of osteoclast differentiation	125
GO:0080164	0.0189714148683365	2.57434105140527	3.38065480959248	8	64	regulation of nitric oxide metabolic process	125
GO:0098930	0.0189714148683365	2.57434105140527	3.38065480959248	8	64	axonal transport	125
GO:0002090	0.0273237853960522	2.57273785277859	2.95807295839342	7	56	regulation of receptor internalization	125
GO:1904645	0.0273237853960522	2.57273785277859	2.95807295839342	7	56	response to amyloid-beta	125
GO:0090311	0.0396370071652602	2.57113791600058	2.53549110719436	6	48	regulation of protein deacetylation	125
GO:0120009	0.0396370071652602	2.57113791600058	2.53549110719436	6	48	intermembrane lipid transfer	125
GO:0007160	1.61603996828022e-05	2.59584354575163	12.3076964161726	29	233	cell-matrix adhesion	0.124463519313305
GO:0071222	4.39469907560327e-05	2.58939221127056	11.0399508625754	26	209	cellular response to lipopolysaccharide	0.124401913875598
GO:0002224	0.00178547563330362	2.56111735306652	6.39155049938578	15	121	toll-like receptor signaling pathway	0.12396694214876
GO:0009611	4.75871835724067e-11	2.64831004896151	28.9996795385355	68	549	response to wounding	0.123861566484517
GO:0019724	4.76938940210681e-05	2.57517269402682	11.0927735939753	26	210	B cell mediated immunity	0.123809523809524
GO:0071706	0.000130040773834963	2.56660823838738	9.82502804037814	23	186	tumor necrosis factor superfamily cytokine production	0.123655913978495
GO:1903555	0.000130040773834963	2.56660823838738	9.82502804037814	23	186	regulation of tumor necrosis factor superfamily cytokine production	0.123655913978495
GO:0051781	0.0071115439254974	2.54595983430339	4.70122309458954	11	89	positive regulation of cell division	0.123595505617978
GO:0014032	0.0101092869098899	2.54110978434447	4.27864124339048	10	81	neural crest cell development	0.123456790123457
GO:0044773	0.0101092869098899	2.54110978434447	4.27864124339048	10	81	mitotic DNA damage checkpoint signaling	0.123456790123457
GO:0046209	0.0101092869098899	2.54110978434447	4.27864124339048	10	81	nitric oxide metabolic process	0.123456790123457
GO:0035773	0.0144222220152181	2.53555484693878	3.85605939219142	9	73	insulin secretion involved in cellular response to glucose stimulus	0.123287671232877
GO:0035924	0.0144222220152181	2.53555484693878	3.85605939219142	9	73	cellular response to vascular endothelial growth factor stimulus	0.123287671232877
GO:0086003	0.0144222220152181	2.53555484693878	3.85605939219142	9	73	cardiac muscle cell contraction	0.123287671232877
GO:0051091	7.59235124452616e-06	2.56737978698051	13.7339101639694	32	260	positive regulation of DNA-binding transcription factor activity	0.123076923076923
GO:0002720	0.0206666940055279	2.5290341041186	3.43347754099236	8	65	positive regulation of cytokine production involved in immune response	0.123076923076923
GO:0070613	0.0206666940055279	2.5290341041186	3.43347754099236	8	65	regulation of protein processing	0.123076923076923
GO:0071677	0.0206666940055279	2.5290341041186	3.43347754099236	8	65	positive regulation of mononuclear cell migration	0.123076923076923
GO:0031109	0.00193881049719091	2.53703774779789	6.44437323078566	15	122	microtubule polymerization or depolymerization	0.122950819672131
GO:0033619	0.0297816566022095	2.52114052953157	3.0108956897933	7	57	membrane protein proteolysis	0.12280701754386
GO:0051289	0.0297816566022095	2.52114052953157	3.0108956897933	7	57	protein homotetramerization	0.12280701754386
GO:0034614	0.00054092256993467	2.5345815645846	8.18752336698179	19	155	cellular response to reactive oxygen species	0.12258064516129
GO:0002367	0.00545027766356871	2.52048273071338	5.17662767718848	12	98	cytokine production involved in immune response	0.122448979591837
GO:0032642	0.00545027766356871	2.52048273071338	5.17662767718848	12	98	regulation of chemokine production	0.122448979591837
GO:0030195	0.0432313672362996	2.5112020629776	2.58831383859424	6	49	negative regulation of blood coagulation	0.122448979591837
GO:0030857	0.0432313672362996	2.5112020629776	2.58831383859424	6	49	negative regulation of epithelial cell differentiation	0.122448979591837
GO:0031146	0.0432313672362996	2.5112020629776	2.58831383859424	6	49	SCF-dependent proteasomal ubiquitin-dependent protein catabolic process	0.122448979591837
GO:0043330	0.0432313672362996	2.5112020629776	2.58831383859424	6	49	response to exogenous dsRNA	0.122448979591837
GO:0046605	0.0432313672362996	2.5112020629776	2.58831383859424	6	49	regulation of centrosome cycle	0.122448979591837
GO:0070849	0.0432313672362996	2.5112020629776	2.58831383859424	6	49	response to epidermal growth factor	0.122448979591837
GO:1990928	0.0432313672362996	2.5112020629776	2.58831383859424	6	49	response to amino acid starvation	0.122448979591837
GO:0031349	4.57894230669193e-06	2.55196978800103	14.6847193291673	34	278	positive regulation of defense response	0.122302158273381
GO:0034109	0.00772620870203724	2.51359012192281	4.75404582598942	11	90	homotypic cell-cell adhesion	0.122222222222222
GO:0034644	0.00772620870203724	2.51359012192281	4.75404582598942	11	90	cellular response to UV	0.122222222222222
GO:0061097	0.00772620870203724	2.51359012192281	4.75404582598942	11	90	regulation of protein tyrosine kinase activity	0.122222222222222
GO:0071219	4.34959982151941e-05	2.53756135199434	11.673823639374	27	221	cellular response to molecule of bacterial origin	0.122171945701357
GO:0050853	0.00149501295894956	2.51936190178292	6.91977781338461	16	131	B cell receptor signaling pathway	0.122137404580153
GO:0002221	0.000298946253319154	2.52615483553172	9.08550980077979	21	172	pattern recognition receptor signaling pathway	0.122093023255814
GO:2000058	0.000418453783257736	2.52121316362802	8.66292794958073	20	164	regulation of ubiquitin-dependent protein catabolic process	0.121951219512195
GO:0031570	0.00210295226215996	2.51340406114533	6.49719596218555	15	123	DNA integrity checkpoint signaling	0.121951219512195
GO:0001910	0.0109849871105463	2.50567472477585	4.33146397479037	10	82	regulation of leukocyte mediated cytotoxicity	0.121951219512195
GO:0008625	0.0109849871105463	2.50567472477585	4.33146397479037	10	82	extrinsic apoptotic signaling pathway via death domain receptors	0.121951219512195
GO:0016575	0.0109849871105463	2.50567472477585	4.33146397479037	10	82	histone deacetylation	0.121951219512195
GO:2001057	0.0109849871105463	2.50567472477585	4.33146397479037	10	82	reactive nitrogen species metabolic process	0.121951219512195
GO:2001252	0.0109849871105463	2.50567472477585	4.33146397479037	10	82	positive regulation of chromosome organization	0.121951219512195
GO:0000077	0.00296253478737024	2.50684945417619	6.07461411098649	14	115	DNA damage checkpoint signaling	0.121739130434783
GO:2001056	0.00082173501060764	2.51027489503288	7.81776424718261	18	148	positive regulation of cysteine-type endopeptidase activity	0.121621621621622
GO:0002437	0.0156746944935447	2.49640502354788	3.9088821235913	9	74	inflammatory response to antigenic stimulus	0.121621621621622
GO:0006635	0.0156746944935447	2.49640502354788	3.9088821235913	9	74	fatty acid beta-oxidation	0.121621621621622
GO:0045766	0.000231413682029533	2.51474767972007	9.56091438337873	22	181	positive regulation of angiogenesis	0.121546961325967
GO:1904018	0.000231413682029533	2.51474767972007	9.56091438337873	22	181	positive regulation of vasculature development	0.121546961325967
GO:0008637	0.00418079683520391	2.49956400418556	5.65203225978743	13	107	apoptotic mitochondrial changes	0.121495327102804
GO:0031589	2.43530737048519e-07	2.54187192118227	19.1746514981573	44	363	cell-substrate adhesion	0.121212121212121
GO:0008630	0.00591225840300294	2.49137048671161	5.22945040858837	12	99	intrinsic apoptotic signaling pathway in response to DNA damage	0.121212121212121
GO:2000573	0.0224666838453568	2.48528946535906	3.48630027239224	8	66	positive regulation of DNA biosynthetic process	0.121212121212121
GO:0002275	0.00838141156569514	2.48202965235174	4.80686855738931	11	91	myeloid cell activation involved in immune response	0.120879120879121
GO:0016064	9.92672211912081e-05	2.50102594500935	10.9343053997757	25	207	immunoglobulin mediated immune response	0.120772946859903
GO:0021782	0.00320966216062093	2.48213172448467	6.12743684238637	14	116	glial cell development	0.120689655172414
GO:0007405	0.0323841704329052	2.47156663072561	3.06371842119318	7	58	neuroblast proliferation	0.120689655172414
GO:2000736	0.0323841704329052	2.47156663072561	3.06371842119318	7	58	regulation of stem cell differentiation	0.120689655172414
GO:0002253	2.37898109539178e-07	2.51406009244992	19.8085242749559	45	375	activation of immune response	0.12
GO:0036465	0.0170051868915827	2.45844155844156	3.96170485499119	9	75	synaptic vesicle recycling	0.12
GO:0008089	0.047023469255662	2.4539905669102	2.64113656999412	6	50	anterograde axonal transport	0.12
GO:1900047	0.047023469255662	2.4539905669102	2.64113656999412	6	50	negative regulation of hemostasis	0.12
GO:1903317	0.0243743578378346	2.44302769571002	3.53912300379213	8	67	regulation of protein maturation	0.119402985074627
GO:2000116	4.97249001131661e-05	2.46701553836332	12.4133418789724	28	235	regulation of cysteine-type endopeptidase activity	0.119148936170213
GO:0032370	0.0129074404092	2.43767771857659	4.43710943759013	10	84	positive regulation of lipid transport	0.119047619047619
GO:0043405	0.000441578137206725	2.44449300699301	9.3496234577792	21	177	regulation of MAP kinase activity	0.11864406779661
GO:0051101	0.00375454996174522	2.43412228796844	6.23308230518613	14	118	regulation of DNA binding	0.11864406779661
GO:0019369	0.0351342524662824	2.42389942033527	3.11654115259307	7	59	arachidonic acid metabolic process	0.11864406779661
GO:0032768	0.0351342524662824	2.42389942033527	3.11654115259307	7	59	regulation of monooxygenase activity	0.11864406779661
GO:0006809	0.018416274533041	2.4216113310996	4.01452758639107	9	76	nitric oxide biosynthetic process	0.118421052631579
GO:0031100	0.018416274533041	2.4216113310996	4.01452758639107	9	76	animal organ regeneration	0.118421052631579
GO:1902106	0.00748653669987685	2.40791538723985	5.38791860278802	12	102	negative regulation of leukocyte differentiation	0.117647058823529
GO:0044774	0.0139584797791858	2.40503915560095	4.48993216899001	10	85	mitotic DNA integrity checkpoint signaling	0.117647058823529
GO:0061351	0.0016980031231428	2.40565522119342	7.65929605298296	17	145	neural precursor cell proliferation	0.117241379310345
GO:0060348	0.000218778918678303	2.41188560959551	10.8286599369759	24	205	bone development	0.117073170731707
GO:0001906	0.000395857132645389	2.40774473280921	9.93067350317791	22	188	cell killing	0.117021276595745
GO:0002690	0.0106074503432461	2.39191120309459	4.96533675158895	11	94	positive regulation of leukocyte chemotaxis	0.117021276595745
GO:0051702	0.0106074503432461	2.39191120309459	4.96533675158895	11	94	biological process involved in interaction with symbiont	0.117021276595745
GO:1903035	0.0106074503432461	2.39191120309459	4.96533675158895	11	94	negative regulation of response to wounding	0.117021276595745
GO:0051607	2.87809189254404e-05	2.42001677283514	13.9980238209689	31	265	defense response to virus	0.116981132075472
GO:0140546	2.87809189254404e-05	2.42001677283514	13.9980238209689	31	265	defense response to symbiont	0.116981132075472
GO:0048469	0.00071782166889748	2.40337891866402	9.03268706937991	20	171	cell maturation	0.116959064327485
GO:0043280	0.00334829998349348	2.38030908894413	6.81413235058484	15	129	positive regulation of cysteine-type endopeptidase activity involved in apoptotic process	0.116279069767442
GO:0014031	0.0150722384978895	2.3732595021773	4.54275490038989	10	86	mesenchymal cell development	0.116279069767442
GO:0032609	0.00616420808861953	2.37265068719987	5.91614591678684	13	112	interferon-gamma production	0.116071428571429
GO:0032649	0.00616420808861953	2.37265068719987	5.91614591678684	13	112	regulation of interferon-gamma production	0.116071428571429
GO:0007004	0.0285240877945343	2.36266105178724	3.64476846659189	8	69	telomere maintenance via telomerase	0.115942028985507
GO:0045669	0.0285240877945343	2.36266105178724	3.64476846659189	8	69	positive regulation of osteoblast differentiation	0.115942028985507
GO:0050688	0.0285240877945343	2.36266105178724	3.64476846659189	8	69	regulation of defense response to virus	0.115942028985507
GO:0009612	0.000195464945129808	2.38195455236688	11.4097099823746	25	216	response to mechanical stimulus	0.115740740740741
GO:0051098	1.56961961400957e-06	2.40584630263794	19.1746514981573	42	363	regulation of binding	0.115702479338843
GO:0042177	0.00471094756974607	2.36547328061347	6.39155049938578	14	121	negative regulation of protein catabolic process	0.115702479338843
GO:0001819	5.25420897092979e-08	2.42217244370784	24.6682155637451	54	467	positive regulation of cytokine production	0.115631691648822
GO:0002764	5.64447527654182e-08	2.41618228318996	24.721038295145	54	468	immune response-regulating signaling pathway	0.115384615384615
GO:0032371	0.0214903041677786	2.35115350488021	4.12017304919083	9	78	regulation of sterol transport	0.115384615384615
GO:0032374	0.0214903041677786	2.35115350488021	4.12017304919083	9	78	regulation of cholesterol transport	0.115384615384615
GO:0070373	0.0214903041677786	2.35115350488021	4.12017304919083	9	78	negative regulation of ERK1 and ERK2 cascade	0.115384615384615
GO:0046661	0.00116267353766664	2.35963846914278	8.71575068098061	19	165	male sex differentiation	0.115151515151515
GO:0007568	4.22298794096261e-06	2.38570526315789	17.9069059445602	39	339	aging	0.115044247787611
GO:0031623	0.00663861047006055	2.34879098360656	5.96896864818672	13	113	receptor internalization	0.115044247787611
GO:0048041	0.0162508328351691	2.34230529429712	4.59557763178978	10	87	focal adhesion assembly	0.114942528735632
GO:0043954	0.0410876210617977	2.33386135626461	3.22218661539283	7	61	cellular component maintenance	0.114754098360656
GO:0050994	0.0410876210617977	2.33386135626461	3.22218661539283	7	61	regulation of lipid catabolic process	0.114754098360656
GO:0045088	0.000225705404377587	2.35700234343087	11.5153554451744	25	218	regulation of innate immune response	0.114678899082569
GO:0002718	0.0123258974153599	2.33536629375677	5.07098221438872	11	96	regulation of cytokine production involved in immune response	0.114583333333333
GO:0019079	0.00387812449993639	2.33900375274375	6.91977781338461	15	131	viral genome replication	0.114503816793893
GO:0019221	7.49695001835135e-08	2.39250825166952	24.9323292207445	54	472	cytokine-mediated signaling pathway	0.114406779661017
GO:0042742	3.75638071571262e-06	2.36908120602332	18.4879559899589	40	350	defense response to bacterium	0.114285714285714
GO:0021700	3.4245544553781e-05	2.35763643105134	14.7903647919671	32	280	developmental maturation	0.114285714285714
GO:0002685	0.000314391682792513	2.34638141400635	11.0927735939753	24	210	regulation of leukocyte migration	0.114285714285714
GO:0062207	0.00937235247144878	2.32984448773401	5.54638679698766	12	105	regulation of pattern recognition receptor signaling pathway	0.114285714285714
GO:0048659	0.000739041020955827	2.33858312629924	9.71938257757838	21	184	smooth muscle cell proliferation	0.114130434782609
GO:0032368	0.00227698518129092	2.33222658685622	7.87058697858249	17	149	regulation of lipid transport	0.114093959731544
GO:0001935	0.000568822390907196	2.33667761268044	10.1947871601773	22	193	endothelial cell proliferation	0.113989637305699
GO:0003231	0.0054514257335254	2.32180663373324	6.49719596218555	14	123	cardiac ventricle development	0.113821138211382
GO:0044403	2.83589413767603e-05	2.34741464923563	15.3185921059659	33	290	biological process involved in symbiotic interaction	0.113793103448276
GO:0071695	0.000200430352482802	2.33161968192584	12.0964054905731	26	229	anatomical structure maturation	0.11353711790393
GO:0008584	0.00319037468996203	2.31649743062693	7.44800512738343	16	141	male gonad development	0.113475177304965
GO:0002429	3.0406429570128e-05	2.33818234893451	15.3714148373658	33	291	immune response-activating cell surface receptor signaling pathway	0.11340206185567
GO:0002757	3.0406429570128e-05	2.33818234893451	15.3714148373658	33	291	immune response-activating signal transduction	0.11340206185567
GO:0014909	0.0132606991887632	2.30808008750654	5.1238049457886	11	97	smooth muscle cell migration	0.11340206185567
GO:2001237	0.0132606991887632	2.30808008750654	5.1238049457886	11	97	negative regulation of extrinsic apoptotic signaling pathway	0.11340206185567
GO:1903707	0.0100767918151947	2.30492824321087	5.59920952838754	12	106	negative regulation of hemopoiesis	0.113207547169811
GO:0002831	1.07923495622371e-05	2.33782961460446	17.2730331677616	37	327	regulation of response to biotic stimulus	0.113149847094801
GO:0071675	0.00767415995278897	2.30247508839601	6.07461411098649	13	115	regulation of mononuclear cell migration	0.11304347826087
GO:0043123	0.000850812596918995	2.30997370398197	9.82502804037814	21	186	positive regulation of I-kappaB kinase/NF-kappaB signaling	0.112903225806452
GO:0007062	0.0442955336888013	2.29129790779485	3.27500934679271	7	62	sister chromatid cohesion	0.112903225806452
GO:0032615	0.0442955336888013	2.29129790779485	3.27500934679271	7	62	interleukin-12 production	0.112903225806452
GO:0032655	0.0442955336888013	2.29129790779485	3.27500934679271	7	62	regulation of interleukin-12 production	0.112903225806452
GO:0046824	0.0442955336888013	2.29129790779485	3.27500934679271	7	62	positive regulation of nucleocytoplasmic transport	0.112903225806452
GO:0046328	0.00447454880866956	2.29909859743152	7.02542327618437	15	133	regulation of JNK cascade	0.112781954887218
GO:0007265	8.923593019869e-06	2.32998885172798	17.8012604817604	38	337	Ras protein signal transduction	0.112759643916914
GO:0046546	0.00342408275752879	2.29798202254523	7.50082785878331	16	142	development of primary male sexual characteristics	0.112676056338028
GO:0003208	0.0331372983225698	2.28739705192305	3.75041392939166	8	71	cardiac ventricle morphogenesis	0.112676056338028
GO:0030902	0.00262331519368483	2.29715619433696	7.97623244138226	17	151	hindbrain development	0.112582781456954
GO:0044409	0.00262331519368483	2.29715619433696	7.97623244138226	17	151	entry into host	0.112582781456954
GO:0032204	0.0249163645884713	2.2846651336591	4.2258185119906	9	80	regulation of telomere maintenance	0.1125
GO:0000075	0.00154431737718708	2.29619243986254	8.92704160658014	19	169	cell cycle checkpoint signaling	0.112426035502959
GO:0014910	0.0188108937171659	2.28274783103399	4.70122309458954	10	89	regulation of smooth muscle cell migration	0.112359550561798
GO:1900407	0.0188108937171659	2.28274783103399	4.70122309458954	10	89	regulation of cellular response to oxidative stress	0.112359550561798
GO:0006275	0.0108215490758251	2.28053655120401	5.65203225978743	12	107	regulation of DNA replication	0.11214953271028
GO:0051341	0.0108215490758251	2.28053655120401	5.65203225978743	12	107	regulation of oxidoreductase activity	0.11214953271028
GO:0002274	0.000320128119800402	2.29682719309275	11.7794691021738	25	223	myeloid leukocyte activation	0.112107623318386
GO:0032434	0.00479958669181503	2.27964902593481	7.07824600758426	15	134	regulation of proteasomal ubiquitin-dependent protein catabolic process	0.111940298507463
GO:0001936	0.00127098609670642	2.28141571093846	9.45526892057897	20	179	regulation of endothelial cell proliferation	0.111731843575419
GO:0002443	6.73448685719161e-07	2.31214833759591	23.2420018159483	49	440	leukocyte mediated immunity	0.111363636363636
GO:0008015	8.35983572874631e-08	2.32255577040985	27.0452384767398	57	512	blood circulation	0.111328125
GO:0034599	5.93467800537887e-05	2.28291536050157	15.2129466431662	32	288	cellular response to oxidative stress	0.111111111111111
GO:0090257	0.000167793867063969	2.27757544224766	13.3113283127704	28	252	regulation of muscle system process	0.111111111111111
GO:0016485	0.000366713881398808	2.27359958506224	11.8851145649736	25	225	protein processing	0.111111111111111
GO:0050679	0.000618658074504838	2.27096273291925	10.9343053997757	23	207	positive regulation of epithelial cell proliferation	0.111111111111111
GO:0050864	0.000804099705709112	2.26964839710445	10.4589008171767	22	198	regulation of B cell activation	0.111111111111111
GO:0043409	0.00136073337045021	2.26702786377709	9.50809165197885	20	180	negative regulation of MAPK cascade	0.111111111111111
GO:0048660	0.00136073337045021	2.26702786377709	9.50809165197885	20	180	regulation of smooth muscle cell proliferation	0.111111111111111
GO:0046718	0.00393386962178174	2.26181911613566	7.60647332158308	16	144	viral entry into host cell	0.111111111111111
GO:0032874	0.0067348141897436	2.25923076923077	6.65566415638519	14	126	positive regulation of stress-activated MAPK cascade	0.111111111111111
GO:0051225	0.0088331707143534	2.25794057377049	6.18025957378625	13	117	spindle assembly	0.111111111111111
GO:0034440	0.011608078330044	2.25665301944729	5.70485499118731	12	108	lipid oxidation	0.111111111111111
GO:0002444	0.015290219417722	2.25536809815951	5.22945040858837	11	99	myeloid leukocyte mediated immunity	0.111111111111111
GO:0048477	0.0201964793440569	2.25408580183861	4.75404582598942	10	90	oogenesis	0.111111111111111
GO:0000422	0.026767249298294	2.25280612244898	4.27864124339048	9	81	autophagy of mitochondrion	0.111111111111111
GO:0001960	0.026767249298294	2.25280612244898	4.27864124339048	9	81	negative regulation of cytokine-mediated signaling pathway	0.111111111111111
GO:0061726	0.026767249298294	2.25280612244898	4.27864124339048	9	81	mitochondrion disassembly	0.111111111111111
GO:2000106	0.026767249298294	2.25280612244898	4.27864124339048	9	81	regulation of leukocyte apoptotic process	0.111111111111111
GO:0070227	0.0356238161650421	2.25152905198777	3.80323666079154	8	72	lymphocyte apoptotic process	0.111111111111111
GO:0022617	0.0476602540515837	2.25025458248472	3.3278320781926	7	63	extracellular matrix disassembly	0.111111111111111
GO:0031343	0.0476602540515837	2.25025458248472	3.3278320781926	7	63	positive regulation of cell killing	0.111111111111111
GO:0034097	6.62321351047691e-13	2.37500567827513	48.6497356192918	102	921	response to cytokine	0.110749185667752
GO:0006897	3.58047894222076e-09	2.32310972038879	33.4367889761256	70	633	endocytosis	0.110584518167457
GO:0051251	8.51227082470173e-06	2.2792216717172	19.1218287667575	40	362	positive regulation of lymphocyte activation	0.110497237569061
GO:0042770	0.00189600171083151	2.25078498753453	9.08550980077979	19	172	signal transduction in response to DNA damage	0.11046511627907
GO:0032103	1.57777125826689e-06	2.27857302491899	22.5553063077498	47	427	positive regulation of response to external stimulus	0.110070257611241
GO:0043281	0.000707321246064641	2.24628776241679	11.0399508625754	23	209	regulation of cysteine-type endopeptidase activity involved in apoptotic process	0.110047846889952
GO:0002696	2.6526897156085e-06	2.2747776587819	21.6044971425519	45	409	positive regulation of leukocyte activation	0.110024449877751
GO:0045807	0.0163884269382363	2.22990050780083	5.28227313998825	11	100	positive regulation of endocytosis	0.11
GO:0014033	0.0216551296870646	2.22613147706781	4.80686855738931	10	91	neural crest cell differentiation	0.10989010989011
GO:0062197	2.11343946035007e-05	2.25860644257703	17.8012604817604	37	337	cellular response to chemical stress	0.109792284866469
GO:2001242	0.00264272339176533	2.23314475967439	8.66292794958073	18	164	regulation of intrinsic apoptotic signaling pathway	0.109756097560976
GO:0042063	5.96429345156121e-05	2.24964872291263	15.8996421513646	33	301	gliogenesis	0.109634551495017
GO:0097191	0.000581561831399247	2.23693901952969	11.5681781765743	24	219	extrinsic apoptotic signaling pathway	0.10958904109589
GO:0061035	0.0382332431373281	2.21676468281973	3.85605939219142	8	73	regulation of cartilage development	0.10958904109589
GO:0050867	2.33095272252384e-06	2.26424938046172	22.1855471879507	46	420	positive regulation of cell activation	0.10952380952381
GO:0001952	0.00771671131426867	2.21934322986955	6.76130961918496	14	128	regulation of cell-matrix adhesion	0.109375
GO:0070304	0.00771671131426867	2.21934322986955	6.76130961918496	14	128	positive regulation of stress-activated protein kinase signaling cascade	0.109375
GO:0031347	9.60330833620381e-09	2.28961613690973	32.8557389307269	68	622	regulation of defense response	0.109324758842444
GO:0031398	0.0101251973267831	2.21508660686669	6.28590503658602	13	119	positive regulation of protein ubiquitination	0.109243697478992
GO:0071356	0.000478086610562228	2.22851069888536	12.0964054905731	25	229	cellular response to tumor necrosis factor	0.109170305676856
GO:0030317	0.0133122970145812	2.21034821298018	5.81050045398707	12	110	flagellated sperm motility	0.109090909090909
GO:0048259	0.0133122970145812	2.21034821298018	5.81050045398707	12	110	regulation of receptor-mediated endocytosis	0.109090909090909
GO:0097722	0.0133122970145812	2.21034821298018	5.81050045398707	12	110	sperm motility	0.109090909090909
GO:0006476	0.0175445762458113	2.20499886389457	5.33509587138813	11	101	protein deacetylation	0.108910891089109
GO:0050776	6.95134284689643e-12	2.32006302876958	47.0650536772953	97	891	regulation of immune response	0.108866442199776
GO:0032465	0.0231888203870178	2.19885896509629	4.85969128878919	10	92	regulation of cytokinesis	0.108695652173913
GO:0002449	2.11212662259076e-05	2.2312410687805	18.4879559899589	38	350	lymphocyte mediated immunity	0.108571428571429
GO:0043122	0.000322962437771426	2.21396864640108	13.1528601185707	27	249	regulation of I-kappaB kinase/NF-kappaB signaling	0.108433734939759
GO:0031397	0.030755766591019	2.19167126309983	4.38428670619025	9	83	negative regulation of protein ubiquitination	0.108433734939759
GO:0045087	2.02614427026738e-11	2.30138726487953	45.850130855098	94	868	innate immune response	0.108294930875576
GO:0050878	1.1026313904524e-05	2.2259131650563	20.0198152005555	41	379	regulation of body fluid levels	0.108179419525066
GO:0051384	0.00514055659192733	2.19278084026285	7.81776424718261	16	148	response to glucocorticoid	0.108108108108108
GO:0070507	0.00514055659192733	2.19278084026285	7.81776424718261	16	148	regulation of microtubule cytoskeleton organization	0.108108108108108
GO:0014066	0.0142329157953377	2.1878973977234	5.86332318538696	12	111	regulation of phosphatidylinositol 3-kinase signaling	0.108108108108108
GO:0002768	6.34743192967672e-05	2.21125747610441	16.639160390963	34	315	immune response-regulating cell surface receptor signaling pathway	0.107936507936508
GO:0007254	0.00321759008836257	2.18780887343706	8.82139614378038	18	167	JNK cascade	0.107784431137725
GO:0002684	1.23890210950876e-11	2.29284102776025	47.5404582598943	97	900	positive regulation of immune system process	0.107777777777778
GO:0007098	0.00880891241879795	2.18083112290009	6.86695508198472	14	130	centrosome cycle	0.107692307692308
GO:0097193	0.000138198226579029	2.20054344735709	15.2129466431662	31	288	intrinsic apoptotic signaling pathway	0.107638888888889
GO:0006979	2.31090256618393e-06	2.22186383565009	23.5589382043476	48	446	response to oxidative stress	0.10762331838565
GO:0032088	0.0247994855743128	2.17224362208794	4.91251402018907	10	93	negative regulation of NF-kappaB transcription factor activity	0.10752688172043
GO:0097306	0.0247994855743128	2.17224362208794	4.91251402018907	10	93	cellular response to alcohol	0.10752688172043
GO:0106027	0.0247994855743128	2.17224362208794	4.91251402018907	10	93	neuron projection organization	0.10752688172043
GO:0042176	1.02814368232361e-05	2.209268902249	20.6536879773541	42	391	regulation of protein catabolic process	0.107416879795396
GO:0030324	0.00263187679115694	2.17893775283831	9.3496234577792	19	177	lung development	0.107344632768362
GO:0071453	0.00263187679115694	2.17893775283831	9.3496234577792	19	177	cellular response to oxygen levels	0.107344632768362
GO:0002833	0.00343088410780345	2.17309989701339	8.87421887518026	18	168	positive regulation of response to biotic stimulus	0.107142857142857
GO:0035601	0.015201160720144	2.16589559877175	5.91614591678684	12	112	protein deacylation	0.107142857142857
GO:0043406	0.015201160720144	2.16589559877175	5.91614591678684	12	112	positive regulation of MAP kinase activity	0.107142857142857
GO:0097061	0.0328975657328373	2.16232653061225	4.43710943759013	9	84	dendritic spine organization	0.107142857142857
GO:0045089	0.00939892122960186	2.16206881437651	6.91977781338461	14	131	positive regulation of innate immune response	0.106870229007634
GO:0019395	0.0200375464643509	2.1568195963368	5.4407413341879	11	103	fatty acid oxidation	0.106796116504854
GO:0007249	0.000203088216978672	2.17893805383264	14.843187523367	30	281	I-kappaB kinase/NF-kappaB signaling	0.106761565836299
GO:0002460	3.0814528979591e-05	2.18838825731273	18.8048923783582	38	356	adaptive immune response based on somatic recombination of immune receptors built from immunoglobulin superfamily domains	0.106741573033708
GO:0010001	0.000854643240134851	2.16942231845952	11.8851145649736	24	225	glial cell differentiation	0.106666666666667
GO:0006278	0.0438287978374691	2.15034917157333	3.96170485499119	8	75	RNA-dependent DNA biosynthetic process	0.106666666666667
GO:0030308	0.00229349972174906	2.15809130669812	9.93067350317791	20	188	negative regulation of cell growth	0.106382978723404
GO:0035296	0.00764906392150789	2.15214627945634	7.44800512738343	15	141	regulation of tube diameter	0.106382978723404
GO:0050921	0.00764906392150789	2.15214627945634	7.44800512738343	15	141	positive regulation of chemotaxis	0.106382978723404
GO:0097746	0.00764906392150789	2.15214627945634	7.44800512738343	15	141	blood vessel diameter maintenance	0.106382978723404
GO:0000079	0.0264890135780112	2.14626197772265	4.96533675158895	10	94	regulation of cyclin-dependent protein serine/threonine kinase activity	0.106382978723404
GO:0050727	1.70637506072991e-05	2.17987219470434	20.3895743203546	41	386	regulation of inflammatory response	0.106217616580311
GO:0071347	0.0162184934231242	2.14432947900727	5.96896864818672	12	113	cellular response to interleukin-1	0.106194690265487
GO:0030335	2.6147784047216e-07	2.20026178576837	29.3694386583347	59	556	positive regulation of cell migration	0.106115107913669
GO:0051272	1.04064879382133e-07	2.20414027894718	31.3767024515302	63	594	positive regulation of cellular component movement	0.106060606060606
GO:0051924	0.000470928774717005	2.15496772075719	13.46979650697	27	255	regulation of calcium ion transport	0.105882352941176
GO:0072384	0.0351403522273487	2.13375402792696	4.48993216899001	9	85	organelle transport along microtubule	0.105882352941176
GO:0006690	0.0131473630384753	2.13405365126677	6.49719596218555	13	123	icosanoid metabolic process	0.105691056910569
GO:0035150	0.0081480774448125	2.13507898268363	7.50082785878331	15	142	regulation of tube size	0.105633802816901
GO:0036294	0.00507836524095658	2.13641689529035	8.50445975538108	17	161	cellular response to decreased oxygen levels	0.105590062111801
GO:0071897	0.00317861994264239	2.13797144137799	9.50809165197885	19	180	DNA biosynthetic process	0.105555555555556
GO:0071345	5.67874218607787e-10	2.22156901169247	43.0505260909042	86	815	cellular response to cytokine stimulus	0.105521472392638
GO:0031334	0.000792576732082817	2.14343732874031	12.5189873417722	25	237	positive regulation of protein-containing complex assembly	0.105485232067511
GO:1902905	0.0016326045385214	2.13480138694568	11.0399508625754	22	209	positive regulation of supramolecular fiber organization	0.105263157894737
GO:0051048	0.00414223228901986	2.13012661295208	9.03268706937991	18	171	negative regulation of secretion	0.105263157894737
GO:0010595	0.0106719377806428	2.12549019607843	7.02542327618437	14	133	positive regulation of endothelial cell migration	0.105263157894737
GO:1903008	0.0172863701251589	2.1231862243362	6.02179137958661	12	114	organelle disassembly	0.105263157894737
GO:0030516	0.0282592427342831	2.12089166616596	5.01815948298884	10	95	regulation of axon extension	0.105263157894737
GO:0048709	0.0282592427342831	2.12089166616596	5.01815948298884	10	95	oligodendrocyte differentiation	0.105263157894737
GO:0050764	0.0282592427342831	2.12089166616596	5.01815948298884	10	95	regulation of phagocytosis	0.105263157894737
GO:1903321	0.0282592427342831	2.12089166616596	5.01815948298884	10	95	negative regulation of protein modification by small protein conjugation or removal	0.105263157894737
GO:0008652	0.0468185064615194	2.11860646399232	4.01452758639107	8	76	cellular amino acid biosynthetic process	0.105263157894737
GO:0086001	0.0468185064615194	2.11860646399232	4.01452758639107	8	76	cardiac muscle cell action potential	0.105263157894737
GO:0030323	0.00338067572287741	2.12465317551228	9.56091438337873	19	181	respiratory tube development	0.104972375690608
GO:0032496	7.0089220915177e-05	2.14434103174956	18.1181968701597	36	343	response to lipopolysaccharide	0.104956268221574
GO:0031023	0.0086726516977814	2.118278362423	7.5536505901832	15	143	microtubule organizing center organization	0.104895104895105
GO:0033002	0.000689919820972535	2.12975592414845	13.1000373871709	26	248	muscle cell proliferation	0.104838709677419
GO:0010508	0.0140013936438283	2.11470794565057	6.55001869358543	13	124	positive regulation of autophagy	0.104838709677419
GO:0000041	0.022782630285213	2.11069051037724	5.54638679698766	11	105	transition metal ion transport	0.104761904761905
GO:0060761	0.0374859759100127	2.10592366816857	4.54275490038989	9	86	negative regulation of response to cytokine stimulus	0.104651162790698
GO:2000117	0.0374859759100127	2.10592366816857	4.54275490038989	9	86	negative regulation of cysteine-type endopeptidase activity	0.104651162790698
GO:0072593	0.000894883019285839	2.12316283398612	12.6246328045719	25	239	reactive oxygen species metabolic process	0.104602510460251
GO:0002064	0.00141922016001516	2.11953106115543	11.6210009079741	23	220	epithelial cell development	0.104545454545455
GO:0061138	0.00359330686266833	2.11149832395168	9.61373711477861	19	182	morphogenesis of a branching epithelium	0.104395604395604
GO:0051258	0.000240063818972146	2.12499411367668	15.6883512257651	31	297	protein polymerization	0.104377104377104
GO:0050778	3.90126760569936e-07	2.15510551480712	30.4258932863323	60	576	positive regulation of immune response	0.104166666666667
GO:0052548	1.10823924336471e-05	2.13675108395743	22.8194199647492	45	432	regulation of endopeptidase activity	0.104166666666667
GO:0032886	0.000950201502826516	2.11316703657242	12.6774555359718	25	240	regulation of microtubule-based process	0.104166666666667
GO:0050851	0.000950201502826516	2.11316703657242	12.6774555359718	25	240	antigen receptor-mediated signaling pathway	0.104166666666667
GO:0032872	0.002933020810928	2.10742314061488	10.1419644287774	20	192	regulation of stress-activated MAPK cascade	0.104166666666667
GO:0001823	0.0301119573062509	2.09611136185476	5.07098221438872	10	96	mesonephros development	0.104166666666667
GO:0060294	0.014897309749345	2.09570769906323	6.60284142498531	13	125	cilium movement involved in cell motility	104
GO:2001233	6.86986647127252e-05	2.12176641816601	18.8048923783582	37	356	regulation of apoptotic signaling pathway	0.103932584269663
GO:0098542	1.81929903532319e-12	2.22015869786368	57.9465363456711	114	1097	defense response to other organism	0.103919781221513
GO:0030856	0.00749924929044421	2.0967275868746	8.1347006355819	16	154	regulation of epithelial cell differentiation	0.103896103896104
GO:0071887	0.024253832634373	2.08835432138629	5.59920952838754	11	106	leukocyte apoptotic process	0.10377358490566
GO:0009615	5.97199561365226e-05	2.11388428114383	19.3859424237569	38	367	response to virus	0.103542234332425
GO:0051701	0.00254253004461425	2.092180546726	10.7230144741761	21	203	biological process involved in interaction with host	0.103448275862069
GO:0098732	0.0195795391577775	2.08211951814818	6.12743684238637	12	116	macromolecule deacylation	0.103448275862069
GO:0001776	0.0399361847263408	2.07880690737834	4.59557763178978	9	87	leukocyte homeostasis	0.103448275862069
GO:0019915	0.0399361847263408	2.07880690737834	4.59557763178978	9	87	lipid storage	0.103448275862069
GO:0002682	1.13113402022768e-15	2.24990932206385	75.2195695134327	147	1424	regulation of immune system process	0.103230337078652
GO:0120162	0.0320488835266518	2.07190071971165	5.1238049457886	10	97	positive regulation of cold-induced thermogenesis	0.103092783505155
GO:1901216	0.0320488835266518	2.07190071971165	5.1238049457886	10	97	positive regulation of neuron death	0.103092783505155
GO:0052126	0.00527576017314493	2.07538357593131	9.24397799497944	18	175	movement in host environment	0.102857142857143
GO:2000060	0.0257929484587899	2.06648346966599	5.65203225978743	11	107	positive regulation of ubiquitin-dependent protein catabolic process	0.102803738317757
GO:0034612	0.000927835765995993	2.08225030992539	13.3641510441703	26	253	response to tumor necrosis factor	0.102766798418972
GO:0097305	0.000927835765995993	2.08225030992539	13.3641510441703	26	253	response to alcohol	0.102766798418972
GO:0070302	0.00350529687411565	2.07094206103494	10.3004326229771	20	195	regulation of stress-activated protein kinase signaling cascade	0.102564102564103
GO:0043112	0.00687498254857651	2.06413815008148	8.76857341238049	17	166	receptor metabolic process	0.102409638554217
GO:0040017	5.69453261952983e-07	2.11315460844344	31.48234791433	61	596	positive regulation of locomotion	0.102348993288591
GO:0010634	0.00559561532657436	2.06213091032343	9.29680072637932	18	176	positive regulation of epithelial cell migration	0.102272727272727
GO:0045787	0.0002791451419474	2.07683411610274	16.5335149281632	32	313	positive regulation of cell cycle	0.10223642172524
GO:0008037	0.00190683750207681	2.06647807637907	11.8851145649736	23	225	cell recognition	0.102222222222222
GO:0003013	6.02749204091035e-07	2.10908952007205	31.5351706457299	61	597	circulatory system process	0.102177554438861
GO:0071478	0.00455806944361186	2.06045434903389	9.82502804037814	19	186	cellular response to radiation	0.102150537634409
GO:0001763	0.00371559672776671	2.05905807298996	10.353255354377	20	196	morphogenesis of a branching structure	0.102040816326531
GO:1902850	0.0110444179552185	2.0536214299048	7.76494151578273	15	147	microtubule cytoskeleton organization involved in mitosis	0.102040816326531
GO:1903531	0.0110444179552185	2.0536214299048	7.76494151578273	15	147	negative regulation of secretion by cell	0.102040816326531
GO:0043502	0.0340716857740645	2.04824031943542	5.17662767718848	10	98	regulation of muscle adaptation	0.102040816326531
GO:0061337	0.0340716857740645	2.04824031943542	5.17662767718848	10	98	cardiac conduction	0.102040816326531
GO:1902882	0.0340716857740645	2.04824031943542	5.17662767718848	10	98	regulation of response to oxidative stress	0.102040816326531
GO:1904029	0.0340716857740645	2.04824031943542	5.17662767718848	10	98	regulation of cyclin-dependent protein kinase activity	0.102040816326531
GO:1903362	0.00104130878594503	2.06382891890789	13.46979650697	26	255	regulation of cellular protein catabolic process	0.101960784313725
GO:0002237	0.000102921956540859	2.07537248028046	19.1746514981573	37	363	response to molecule of bacterial origin	0.101928374655647
GO:2000377	0.00896764797934657	2.05176648954393	8.29316882978155	16	157	regulation of reactive oxygen species metabolic process	0.101910828025478
GO:0031960	0.00728948702740075	2.05026063100137	8.82139614378038	17	167	response to corticosteroid	0.101796407185629
GO:0010952	0.00393629133373328	2.04730836729577	10.4060780857769	20	197	positive regulation of peptidase activity	0.101522842639594
GO:2000147	1.19448613724184e-06	2.08772589896996	30.7428296747316	59	582	positive regulation of cell motility	0.101374570446735
GO:0014074	0.0117102669811536	2.03806487471245	7.81776424718261	15	148	response to purine-containing compound	0.101351351351351
GO:0018108	9.4356182301793e-05	2.06275449550216	19.8085242749559	38	375	peptidyl-tyrosine phosphorylation	0.101333333333333
GO:0046777	0.00213846247914324	2.04598506069094	11.9907600277733	23	227	protein autophosphorylation	0.101321585903084
GO:0000045	0.0361819628927547	2.02511161354742	5.22945040858837	10	99	autophagosome assembly	0.101010101010101
GO:0060996	0.0361819628927547	2.02511161354742	5.22945040858837	10	99	dendritic spine development	0.101010101010101
GO:0010506	0.000349887935871342	2.04721626427616	16.7448058537628	32	317	regulation of autophagy	0.100946372239748
GO:0019058	0.000349887935871342	2.04721626427616	16.7448058537628	32	317	viral life cycle	0.100946372239748
GO:0007163	0.00277232563504722	2.03573011417597	11.5153554451744	22	218	establishment or maintenance of cell polarity	0.100917431192661
GO:0008154	0.00277232563504722	2.03573011417597	11.5153554451744	22	218	actin polymerization or depolymerization	0.100917431192661
GO:0006936	0.000192035281534167	2.04862790947697	18.3294877957592	35	347	muscle contraction	0.100864553314121
GO:0007093	0.018924722293132	2.02298261729791	6.81413235058484	13	129	mitotic cell cycle checkpoint signaling	0.10077519379845
GO:0009617	5.5187289092786e-08	2.0898788334041	39.3529348929125	75	745	response to bacterium	0.100671140939597
GO:0032200	0.0100675924623812	2.02284046888363	8.39881429258132	16	159	telomere organization	0.10062893081761
GO:0010950	0.0066513782326614	2.0233606898184	9.45526892057897	18	179	positive regulation of endopeptidase activity	0.100558659217877
GO:0018212	0.000111458649417786	2.04420115049174	19.9669924691556	38	378	peptidyl-tyrosine modification	0.100529100529101
GO:0051403	0.00195447560971679	2.02653813712495	12.6246328045719	24	239	stress-activated MAPK cascade	0.100418410041841
GO:0031396	0.0038020458510056	2.01388888888889	11.0927735939753	21	210	regulation of protein ubiquitination	0.1
GO:0045637	0.0038020458510056	2.01388888888889	11.0927735939753	21	210	regulation of myeloid cell differentiation	0.1
GO:0015918	0.0200487011680579	2.00557832422587	6.86695508198472	13	130	sterol transport	0.1
GO:0002761	0.0248353236185897	2.00454907312635	6.3387277679859	12	120	regulation of myeloid leukocyte differentiation	0.1
GO:0007052	0.0248353236185897	2.00454907312635	6.3387277679859	12	120	mitotic spindle organization	0.1
GO:0048675	0.0248353236185897	2.00454907312635	6.3387277679859	12	120	axon extension	0.1
GO:0072655	0.0248353236185897	2.00454907312635	6.3387277679859	12	120	establishment of protein localization to mitochondrion	0.1
GO:0014812	0.0308332350168532	2.00352192683481	5.81050045398707	11	110	muscle cell migration	0.1
GO:0061387	0.0308332350168532	2.00352192683481	5.81050045398707	11	110	regulation of extent of cell growth	0.1
GO:1905954	0.0308332350168532	2.00352192683481	5.81050045398707	11	110	positive regulation of lipid localization	0.1
GO:0006626	0.0383812446654789	2.00249687890137	5.28227313998825	10	100	protein targeting to mitochondrion	0.1
GO:0060840	0.0383812446654789	2.00249687890137	5.28227313998825	10	100	artery development	0.1
GO:0002028	0.0479301853045276	2.00147392290249	4.75404582598942	9	90	regulation of sodium ion transport	0.1
GO:0030901	0.0479301853045276	2.00147392290249	4.75404582598942	9	90	midbrain development	0.1
GO:0042475	0.0479301853045276	2.00147392290249	4.75404582598942	9	90	odontogenesis of dentin-containing tooth	0.1
GO:0052547	2.65496752227445e-05	2.03573317660887	24.3512791753458	46	461	regulation of peptidase activity	0.0997830802603037
GO:0030099	0.000131315260556496	2.02597235379055	20.1254606633552	38	381	myeloid cell differentiation	0.0997375328083989
GO:0050678	0.000131315260556496	2.02597235379055	20.1254606633552	38	381	regulation of epithelial cell proliferation	0.0997375328083989
GO:0071214	0.000356953119761056	2.01969896941956	17.4843240933611	33	331	cellular response to abiotic stimulus	0.0996978851963746
GO:0104004	0.000356953119761056	2.01969896941956	17.4843240933611	33	331	cellular response to environmental stimulus	0.0996978851963746
GO:0007264	1.2587710896955e-05	2.03591657477829	26.517011162741	50	502	small GTPase mediated signal transduction	0.099601593625498
GO:0045732	0.00267403089629655	2.00618131868132	12.2020509533729	23	231	positive regulation of protein catabolic process	0.0995670995670996
GO:1903050	0.00327712505217674	2.0046977389533	11.673823639374	22	221	regulation of proteolysis involved in cellular protein catabolic process	0.0995475113122172
GO:0030041	0.00605478209731932	1.99998801246703	10.0891416973776	19	191	actin filament polymerization	0.0994764397905759
GO:1905952	0.00744103266829767	1.99830672319347	9.56091438337873	18	181	regulation of lipid localization	0.0994475138121547
GO:0006887	0.00025251905520509	2.01573649716617	18.5936014527586	35	352	exocytosis	0.0994318181818182
GO:0036293	0.000460419967650973	2.01134291788275	17.0089195107622	32	322	response to decreased oxygen levels	0.0993788819875776
GO:0003205	0.0112717224817408	1.99471240741397	8.50445975538108	16	161	cardiac chamber development	0.0993788819875776
GO:0002252	7.24229547944118e-07	2.04409714579206	34.598889066923	65	655	immune effector process	0.099236641221374
GO:0000723	0.0212219820087353	1.98846901917199	6.91977781338461	13	131	telomere maintenance	0.099236641221374
GO:0046683	0.0212219820087353	1.98846901917199	6.91977781338461	13	131	response to organophosphorus	0.099236641221374
GO:0003206	0.0262968300659095	1.98604603119454	6.39155049938578	12	121	cardiac chamber morphogenesis	0.0991735537190083
GO:0043068	5.42571931202511e-06	2.02970021413276	29.3166159269348	55	555	positive regulation of programmed cell death	0.0990990990990991
GO:0090288	0.0326592701312199	1.98337423312883	5.86332318538696	11	111	negative regulation of cellular response to growth factor stimulus	0.0990990990990991
GO:0006469	0.00424519622521025	1.99257388256674	11.1984190567751	21	212	negative regulation of protein kinase activity	0.0990566037735849
GO:0050830	0.0406709884478599	1.98037917139041	5.33509587138813	10	101	defense response to Gram-positive bacterium	0.099009900990099
GO:0032101	2.48749652846946e-09	2.07086618284342	50.1815948298884	94	950	regulation of response to external stimulus	0.0989473684210526
GO:0003018	0.00162391202086643	1.99325245036827	13.8923783581691	26	263	vascular process in circulatory system	0.0988593155893536
GO:0016032	8.93651219921558e-05	2.00749114375324	21.9214335309512	41	415	viral process	0.0987951807228916
GO:0032271	0.00298177410345556	1.98684807256236	12.3076964161726	23	233	regulation of protein polymerization	0.0987124463519313
GO:0022409	0.00114480247648142	1.98923647242456	15.0016557175666	28	284	positive regulation of cell-cell adhesion	0.0985915492957746
GO:0050730	0.00171345468409712	1.98476399905757	13.945201089569	26	264	regulation of peptidyl-tyrosine phosphorylation	0.0984848484848485
GO:0006898	0.00256832344011916	1.97991521431936	12.8887464615713	24	244	receptor-mediated endocytosis	0.0983606557377049
GO:0002688	0.0278200510231945	1.96787940820694	6.44437323078566	12	122	regulation of leukocyte chemotaxis	0.0983606557377049
GO:0051928	0.0278200510231945	1.96787940820694	6.44437323078566	12	122	positive regulation of calcium ion transport	0.0983606557377049
GO:0006952	7.02744563869439e-16	2.1502591369794	90.2740479623992	168	1709	defense response	0.0983031012287888
GO:0071322	0.0125864866995307	1.96734973537205	8.61010521818085	16	163	cellular response to carbohydrate stimulus	0.098159509202454
GO:0071331	0.0155232378622694	1.96366395857513	8.08187790418202	15	153	cellular response to hexose stimulus	0.0980392156862745
GO:0070482	0.00040248770428233	1.98154659351321	18.3294877957592	34	347	response to oxygen levels	0.0979827089337176
GO:0050777	0.00713084633838568	1.96536671575847	10.2476098915772	19	194	negative regulation of immune response	0.0979381443298969
GO:1901654	0.00713084633838568	1.96536671575847	10.2476098915772	19	194	response to ketone	0.0979381443298969
GO:0006959	0.000734187591648754	1.97413025387973	16.7448058537628	31	317	humoral immune response	0.0977917981072555
GO:0010639	0.000424091262982485	1.97512255310635	18.3823105271591	34	348	negative regulation of organelle organization	0.0977011494252874
GO:0001659	0.01078641505238	1.95806794055202	9.19115526357955	17	174	temperature homeostasis	0.0977011494252874
GO:0007584	0.01078641505238	1.95806794055202	9.19115526357955	17	174	response to nutrient	0.0977011494252874
GO:0006954	1.07896871948968e-07	2.02032790778754	42.2053623885061	78	799	inflammatory response	0.097622027534418
GO:0030168	0.0294062875620831	1.95004011175966	6.49719596218555	12	123	platelet activation	0.0975609756097561
GO:0071900	0.000365726324356411	1.9713940005694	18.9633605725578	35	359	regulation of protein serine/threonine kinase activity	0.0974930362116992
GO:0080134	7.77471458718112e-12	2.07442153195385	68.8280190140469	127	1303	regulation of response to stress	0.0974673829623945
GO:0071326	0.0163891359095886	1.94942608541504	8.1347006355819	15	154	cellular response to monosaccharide stimulus	0.0974025974025974
GO:0051495	0.00428913121069836	1.95500537340065	11.9379372963734	22	226	positive regulation of cytoskeleton organization	0.0973451327433628
GO:0014065	0.0202446179788154	1.94442603550296	7.60647332158308	14	144	phosphatidylinositol 3-kinase signaling	0.0972222222222222
GO:0031098	0.00300978176619502	1.95294500336904	13.047214655771	24	247	stress-activated protein kinase signaling cascade	0.097165991902834
GO:1905475	0.0113793336153356	1.9455644111059	9.24397799497944	17	175	regulation of protein localization to membrane	0.0971428571428571
GO:0070372	0.000995755839342097	1.95712379606893	16.3222240025637	30	309	regulation of ERK1 and ERK2 cascade	0.0970873786407767
GO:0019233	0.0455273103278875	1.93757070524015	5.4407413341879	10	103	sensory perception of pain	0.0970873786407767
GO:1905037	0.0455273103278875	1.93757070524015	5.4407413341879	10	103	autophagosome organization	0.0970873786407767
GO:0080135	1.93933037365761e-06	1.98953745692001	34.8630027239224	64	660	regulation of cellular response to stress	0.096969696969697
GO:0070371	0.000702028573367621	1.95644947507942	17.4315013619612	32	330	ERK1 and ERK2 cascade	0.096969696969697
GO:0009895	0.00085781888578785	1.95330164486278	16.9032740479624	31	320	negative regulation of catabolic process	0.096875
GO:0045862	0.00034944494658737	1.95600359766152	19.6500560807563	36	372	positive regulation of proteolysis	0.0967741935483871
GO:0008217	0.00974982359229155	1.93828159482124	9.82502804037814	18	186	regulation of blood pressure	0.0967741935483871
GO:0010970	0.0172916629038716	1.93539161044295	8.18752336698179	15	155	transport along microtubule	0.0967741935483871
GO:1903364	0.0172916629038716	1.93539161044295	8.18752336698179	15	155	positive regulation of cellular protein catabolic process	0.0967741935483871
GO:0044057	9.66585543976006e-06	1.97131472799719	30.6371842119318	56	580	regulation of system process	0.096551724137931
GO:0051961	0.0213606190322431	1.92947347817577	7.65929605298296	14	145	negative regulation of nervous system development	0.096551724137931
GO:0002244	0.0385948005376471	1.92527845613199	6.02179137958661	11	114	hematopoietic progenitor cell differentiation	0.0964912280701754
GO:0051261	0.0385948005376471	1.92527845613199	6.02179137958661	11	114	protein depolymerization	0.0964912280701754
GO:0090100	0.0385948005376471	1.92527845613199	6.02179137958661	11	114	positive regulation of transmembrane receptor protein serine/threonine kinase signaling pathway	0.0964912280701754
GO:0033044	0.0102738260785274	1.92670278307607	9.87785077177803	18	187	regulation of chromosome organization	0.0962566844919786
GO:0061136	0.0102738260785274	1.92670278307607	9.87785077177803	18	187	regulation of proteasomal protein catabolic process	0.0962566844919786
GO:1903039	0.00408962658645473	1.93099647266314	12.6246328045719	23	239	positive regulation of leukocyte cell-cell adhesion	0.096234309623431
GO:0051302	0.0126422933194853	1.9210262345679	9.3496234577792	17	177	regulation of cell division	0.096045197740113
GO:0070585	0.0327728652373123	1.91530873814549	6.60284142498531	12	125	protein localization to mitochondrion	96
GO:0043410	7.11790236295348e-05	1.94447566595482	25.3549110719436	46	480	positive regulation of MAPK cascade	0.0958333333333333
GO:1903532	0.0021214167205305	1.92382291794057	14.8960102547669	27	282	positive regulation of secretion by cell	0.0957446808510638
GO:0044419	1.07539741752894e-13	2.06129195076812	86.2595203760081	156	1633	biological process involved in interspecies interaction between organisms	0.095529699938763
GO:0007059	0.000778254637613018	1.92125402702956	18.2766650643593	33	346	chromosome segregation	0.0953757225433526
GO:0051707	2.38382792401538e-12	2.0375349014299	78.1248197404262	141	1479	response to other organism	0.0953346855983773
GO:0043207	2.50714646004942e-12	2.03588903997633	78.1776424718261	141	1480	response to external biotic stimulus	0.0952702702702703
GO:0009607	1.15777976397491e-12	2.04077567484779	80.3961971906212	145	1522	response to biotic stimulus	0.09526938239159
GO:0006955	1.45937714810133e-16	2.09854423292273	105.381349142766	190	1995	immune response	0.0952380952380952
GO:0010951	0.00388756189687421	1.9095718571039	13.3113283127704	24	252	negative regulation of endopeptidase activity	0.0952380952380952
GO:0046578	0.0113890846292874	1.90395143368204	9.98349623457779	18	189	regulation of Ras protein signal transduction	0.0952380952380952
GO:0000070	0.0164004656281726	1.90209336290366	8.87421887518026	16	168	mitotic sister chromatid segregation	0.0952380952380952
GO:0040012	3.31428918611771e-09	1.98959757618798	57.1541953746729	103	1082	regulation of locomotion	0.0951940850277264
GO:0010810	0.00680408309266237	1.90193181818182	11.673823639374	21	221	regulation of cell-substrate adhesion	0.0950226244343891
GO:0099003	0.00974845513132328	1.89956712422396	10.5645462799765	19	200	vesicle-mediated transport in synapse	95
GO:0051270	2.16183053775756e-09	1.98775999910297	58.9501682422689	106	1116	regulation of cellular component movement	0.0949820788530466
GO:0006941	0.0140129271272788	1.89709393893207	9.45526892057897	17	179	striated muscle contraction	0.0949720670391061
GO:0050714	0.0293637262361952	1.89160827604442	7.2367142017839	13	137	positive regulation of protein secretion	0.0948905109489051
GO:0060048	0.0293637262361952	1.89160827604442	7.2367142017839	13	137	cardiac muscle contraction	0.0948905109489051
GO:0033559	0.0429459052257636	1.88839224851495	6.12743684238637	11	116	unsaturated fatty acid metabolic process	0.0948275862068965
GO:0035967	0.0429459052257636	1.88839224851495	6.12743684238637	11	116	cellular response to topologically incorrect protein	0.0948275862068965
GO:1901653	0.000738986750037182	1.90706725734998	18.9633605725578	34	359	cellular response to peptide	0.0947075208913649
GO:0043408	4.29348691718032e-06	1.93571453806748	35.7081664263206	64	676	regulation of MAPK cascade	0.0946745562130177
GO:0043161	0.00031621423857178	1.91076336954988	21.7629653367516	39	412	proteasome-mediated ubiquitin-dependent protein catabolic process	0.0946601941747573
GO:0030048	0.0364063552343307	1.8817854123092	6.70848688778508	12	127	actin filament-based movement	0.094488188976378
GO:0001666	0.00181954848020923	1.89682254196643	16.2165785397639	29	307	response to hypoxia	0.0944625407166124
GO:0010721	0.0147404527509639	1.88534802696357	9.50809165197885	17	180	negative regulation of cell development	0.0944444444444444
GO:0048545	0.00110118743388117	1.89811401672572	17.9069059445602	32	339	response to steroid hormone	0.0943952802359882
GO:0048608	0.00028561202854584	1.90441693010186	22.3968381135502	40	424	reproductive structure development	0.0943396226415094
GO:0043523	0.00877608890757761	1.88574991400069	11.1984190567751	20	212	regulation of neuron apoptotic process	0.0943396226415094
GO:0001539	0.0309151406525355	1.87636885245902	7.28953693318378	13	138	cilium or flagellum-dependent cell motility	0.0942028985507246
GO:0060285	0.0309151406525355	1.87636885245902	7.28953693318378	13	138	cilium-dependent cell motility	0.0942028985507246
GO:1903322	0.0309151406525355	1.87636885245902	7.28953693318378	13	138	positive regulation of protein modification by small protein conjugation or removal	0.0942028985507246
GO:0070997	0.000814407168312343	1.89518548761548	19.0690060353576	34	361	neuron death	0.0941828254847645
GO:0000819	0.0107748620625398	1.87859275533773	10.6701917427763	19	202	sister chromatid segregation	0.0940594059405941
GO:0009411	0.026290709342362	1.87187844254511	7.87058697858249	14	149	response to UV	0.0939597315436242
GO:0099504	0.0154970999546549	1.87374535782395	9.56091438337873	17	181	synaptic vesicle cycle	0.0939226519337017
GO:0010498	0.000115822202425732	1.89958250933861	25.8831383859424	46	490	proteasomal protein catabolic process	0.0938775510204082
GO:0045785	0.000270456943106755	1.8935611388143	23.0835336217486	41	437	positive regulation of cell adhesion	0.0938215102974828
GO:0050673	0.000270456943106755	1.8935611388143	23.0835336217486	41	437	epithelial cell proliferation	0.0938215102974828
GO:0071496	0.00172285936353228	1.88170148502391	16.9032740479624	30	320	cellular response to external stimulus	0.09375
GO:1903522	0.00473592568534003	1.87621940325174	13.5226192383699	24	256	regulation of blood circulation	0.09375
GO:0017015	0.0383260996660721	1.86545724067342	6.76130961918496	12	128	regulation of transforming growth factor beta receptor signaling pathway	0.09375
GO:0061458	0.000329746438256684	1.88932726683603	22.5553063077498	40	427	reproductive system development	0.0936768149882904
GO:0060541	0.0113194467654584	1.86827655759749	10.7230144741761	19	203	respiratory system development	0.0935960591133005
GO:0030162	2.29166500518499e-06	1.91615228814185	39.5114030871121	70	748	regulation of proteolysis	0.0935828877005348
GO:0048870	2.81345549291187e-13	2.01520681738589	90.3268706937991	160	1710	cell motility	0.0935672514619883
GO:0051674	2.81345549291187e-13	2.01520681738589	90.3268706937991	160	1710	localization of cell	0.0935672514619883
GO:0051402	0.00579724152484483	1.86963484945548	12.9943919243711	23	246	neuron apoptotic process	0.0934959349593496
GO:0030334	6.00060909066768e-08	1.93424641800902	52.0303904288843	92	985	regulation of cell migration	0.0934010152284264
GO:0051348	0.0042633074081449	1.86668630363882	14.1564920151685	25	268	negative regulation of transferase activity	0.0932835820895522
GO:0050731	0.0139066132406426	1.86000882742386	10.1947871601773	18	193	positive regulation of peptidyl-tyrosine phosphorylation	0.0932642487046632
GO:0009410	0.000230519948428826	1.87839010631373	24.4041019067457	43	462	response to xenobiotic stimulus	0.0930735930735931
GO:0016477	1.18367936133357e-11	1.98055360299186	80.6074881162207	142	1526	cell migration	0.0930537352555701
GO:0030833	0.0200484650666766	1.85290009750441	9.08550980077979	16	172	regulation of actin filament polymerization	0.0930232558139535
GO:1990138	0.0200484650666766	1.85290009750441	9.08550980077979	16	172	neuron projection extension	0.0930232558139535
GO:2000145	3.14774063325382e-08	1.92981067321457	55.0941088500774	97	1043	regulation of cell motility	0.0930009587727709
GO:0003012	0.000280895012019192	1.87397429623715	23.8758745927469	42	452	muscle system process	0.0929203539823009
GO:0007292	0.0341945915112998	1.84660997805602	7.39518239598355	13	140	female gamete generation	0.0928571428571429
GO:0050768	0.0341945915112998	1.84660997805602	7.39518239598355	13	140	negative regulation of neurogenesis	0.0928571428571429
GO:0033673	0.00744889541833945	1.85381784949857	12.5189873417722	22	237	negative regulation of kinase activity	0.0928270042194093
GO:0043065	8.01007825178088e-05	1.87784071729269	28.4714522245367	50	539	positive regulation of apoptotic process	0.0927643784786642
GO:0021537	0.00638122398674109	1.85280423280423	13.1000373871709	23	248	telencephalon development	0.092741935483871
GO:0071333	0.0290497153193716	1.84434212988958	7.97623244138226	14	151	cellular response to glucose stimulus	0.0927152317880795
GO:0071456	0.0290497153193716	1.84434212988958	7.97623244138226	14	151	cellular response to hypoxia	0.0927152317880795
GO:0050870	0.0106659152637103	1.8468440007582	11.4097099823746	20	216	positive regulation of T cell activation	0.0925925925925926
GO:0002694	3.22913946645098e-05	1.87881308117458	31.9577524969289	56	605	regulation of leukocyte activation	0.0925619834710744
GO:0051099	0.0210502709727696	1.84099344728039	9.13833253217967	16	173	positive regulation of binding	0.092485549132948
GO:0055001	0.0179491706929224	1.83977107513368	9.71938257757838	17	184	muscle cell development	0.0923913043478261
GO:0010035	5.57827648363603e-05	1.87076340699181	30.3202478235326	53	574	response to inorganic substance	0.0923344947735192
GO:0042476	0.0423770641882363	1.83363114341724	6.86695508198472	12	130	odontogenesis	0.0923076923076923
GO:0048863	0.0130856601027939	1.8379899663708	10.8814826683758	19	206	stem cell differentiation	0.0922330097087379
GO:0002683	0.000457283157808518	1.85501168742946	22.925065427549	40	434	negative regulation of immune system process	0.0921658986175115
GO:0045229	0.00310220043047127	1.8429775746882	16.0581103455643	28	304	external encapsulating structure organization	0.0921052631578947
GO:0033993	5.14140596610643e-07	1.89207346492115	47.646103722694	83	902	response to lipid	0.0920177383592018
GO:0051240	1.36179594916072e-10	1.94158167257002	76.43449233563	133	1447	positive regulation of multicellular organismal process	0.0919143054595715
GO:0051604	0.00378700005189322	1.8360975495807	15.5298830315655	27	294	protein maturation	0.0918367346938776
GO:0051235	0.00239351422918374	1.83661431836614	17.2730331677616	30	327	maintenance of location	0.0917431192660551
GO:0007018	0.00111858932848318	1.83829348896501	20.1782833947551	35	382	microtubule-based movement	0.0916230366492147
GO:0009636	0.00629375412037907	1.82829276788436	13.8395556267692	24	262	response to toxic substance	0.0916030534351145
GO:0010466	0.00629375412037907	1.82829276788436	13.8395556267692	24	262	negative regulation of peptidase activity	0.0916030534351145
GO:0031330	0.00629375412037907	1.82829276788436	13.8395556267692	24	262	negative regulation of cellular catabolic process	0.0916030534351145
GO:1903844	0.0445103497861692	1.8181192640823	6.91977781338461	12	131	regulation of cellular response to transforming growth factor beta stimulus	0.0916030534351145
GO:0040011	1.96045669492414e-13	1.9779107792929	99.2010895689793	172	1878	locomotion	0.0915867944621938
GO:0072006	0.037716461338684	1.81777385944847	7.50082785878331	13	142	nephron development	0.0915492957746479
GO:0050680	0.0272166478361377	1.8175585353417	8.66292794958073	15	164	negative regulation of epithelial cell proliferation	0.0914634146341463
GO:0051249	0.000181713131378668	1.84479011806853	27.1508839395396	47	514	regulation of lymphocyte activation	0.0914396887159533
GO:0002573	0.0143793794835627	1.8183330606011	10.9871281311756	19	208	myeloid leukocyte differentiation	0.0913461538461538
GO:2001020	0.0122866647658423	1.81869097811037	11.5681781765743	20	219	regulation of response to DNA damage stimulus	0.091324200913242
GO:1901652	0.000221113668766658	1.84002556182767	26.6226566255408	46	504	response to peptide	0.0912698412698413
GO:0045861	0.00193261476937221	1.82545375929875	18.5407787213588	32	351	negative regulation of proteolysis	0.0911680911680912
GO:0010959	0.000903880937090006	1.82899785930632	21.4460289483523	37	406	regulation of metal ion transport	0.0911330049261084
GO:1903827	0.00017080034541441	1.83751572417741	27.8375794477381	48	527	regulation of cellular protein localization	0.0910815939278937
GO:0050865	3.36374858303159e-05	1.84344086021505	34.2819526785237	59	649	regulation of cell activation	0.0909090909090909
GO:0045786	0.00128067616190427	1.82222222222222	20.3367515889548	35	385	negative regulation of cell cycle	0.0909090909090909
GO:1903320	0.009411383451666	1.81116856256463	12.7831009987716	22	242	regulation of protein modification by small protein conjugation or removal	0.0909090909090909
GO:0070555	0.0395707937521235	1.80368852459016	7.5536505901832	13	143	response to interleukin-1	0.0909090909090909
GO:0090066	0.000217169286615933	1.8286993837929	27.3621748651391	47	518	regulation of anatomical structure size	0.0907335907335907
GO:0045765	0.00246252600839105	1.81283689895213	18.0653741387598	31	342	regulation of angiogenesis	0.0906432748538012
GO:0010942	5.79704962988962e-05	1.8339645958966	32.6444480051274	56	618	positive regulation of cell death	0.0906148867313916
GO:0008284	4.6221447797564e-07	1.86168209279785	51.3436949206858	88	972	positive regulation of cell population proliferation	0.0905349794238683
GO:0008064	0.0216712167352934	1.79632637836017	9.93067350317791	17	188	regulation of actin polymerization or depolymerization	0.0904255319148936
GO:0001817	5.74584651921203e-06	1.84206069266348	42.0997169257064	72	797	regulation of cytokine production	0.0903387703889586
GO:0000165	7.80993375440297e-06	1.8398505930745	40.9376168349089	70	775	MAPK cascade	0.0903225806451613
GO:0051047	0.00407517501346046	1.80314536424085	16.3750467339636	28	310	positive regulation of secretion	0.0903225806451613
GO:0060326	0.00407517501346046	1.80314536424085	16.3750467339636	28	310	cell chemotaxis	0.0903225806451613
GO:0001890	0.0414886585235204	1.78981823301214	7.60647332158308	13	144	placenta development	0.0902777777777778
GO:0007612	0.0414886585235204	1.78981823301214	7.60647332158308	13	144	learning	0.0902777777777778
GO:0051129	2.65287141090804e-05	1.83086601941748	36.2892164717193	62	687	negative regulation of cellular component organization	0.0902474526928675
GO:0010565	0.04899735629862	1.78786468951166	7.02542327618437	12	133	regulation of cellular ketone metabolic process	0.0902255639097744
GO:1903052	0.04899735629862	1.78786468951166	7.02542327618437	12	133	positive regulation of proteolysis involved in cellular protein catabolic process	0.0902255639097744
GO:0001816	5.37589515626768e-06	1.83794356917279	42.7864124339048	73	810	cytokine production	0.0901234567901235
GO:0030100	0.016506191945322	1.78961554982818	11.1455963253752	19	211	regulation of endocytosis	0.0900473933649289
GO:0006914	0.000258753658784144	1.81287965135769	27.5734657907387	47	522	autophagy	0.0900383141762452
GO:0061919	0.000258753658784144	1.81287965135769	27.5734657907387	47	522	process utilizing autophagic mechanism	0.0900383141762452
GO:0030832	0.0226874739783289	1.78578093597473	9.98349623457779	17	189	regulation of actin filament length	0.0899470899470899
GO:0140694	0.00207241707104359	1.798286272643	19.3859424237569	33	367	non-membrane-bounded organelle assembly	0.0899182561307902
GO:0016192	1.68208125281477e-10	1.89863940859363	82.8788655664156	141	1569	vesicle-mediated transport	0.0898661567877629
GO:0034976	0.00922176168343088	1.7883711424484	13.5226192383699	23	256	response to endoplasmic reticulum stress	0.08984375
GO:0060560	0.01260195467171	1.78452741240833	12.3605191475725	21	234	developmental growth involved in morphogenesis	0.0897435897435897
GO:0035051	0.036867376457341	1.77889490790899	8.24034609838167	14	156	cardiocyte differentiation	0.0897435897435897
GO:0030198	0.0051917171305105	1.78847291985978	15.8996421513646	27	301	extracellular matrix organization	0.0897009966777409
GO:0030258	0.0172671865448927	1.78024144009401	11.1984190567751	19	212	lipid modification	0.089622641509434
GO:0099111	0.0237394943968921	1.77535740621804	10.0363189659777	17	190	microtubule-based transport	0.0894736842105263
GO:0043062	0.00542405989694188	1.78186732186732	15.9524648827645	27	302	extracellular structure organization	0.0894039735099338
GO:0045930	0.0131748312599474	1.77608712443037	12.4133418789724	21	235	negative regulation of mitotic cell cycle	0.0893617021276596
GO:0097190	0.000150388960531421	1.80142969332071	30.7428296747316	52	582	apoptotic signaling pathway	0.0893470790378007
GO:1901701	4.31539059794435e-08	1.85016614101695	63.9155049938578	108	1210	cellular response to oxygen-containing compound	0.0892561983471074
GO:0002262	0.038596035189037	1.76635467097006	8.29316882978155	14	157	myeloid cell homeostasis	0.089171974522293
GO:0006928	1.00590601894226e-13	1.93484385105287	112.56524061315	190	2131	movement of cell or subcellular component	0.0891600187705303
GO:0017157	0.0211623525700114	1.76812340482694	10.6701917427763	18	202	regulation of exocytosis	0.0891089108910891
GO:1901342	0.00320284808691545	1.77791205389778	18.3823105271591	31	348	regulation of vasculature development	0.0890804597701149
GO:0051050	3.05661464621034e-06	1.81766650413515	47.4876355284944	80	899	positive regulation of transport	0.0889877641824249
GO:0048584	1.43620180612747e-13	1.9289476744186	112.19548149335	189	2124	positive regulation of response to stimulus	0.0889830508474576
GO:0000209	0.0137682136397414	1.76772535075918	12.4661646103723	21	236	protein polyubiquitination	0.0889830508474576
GO:0048738	0.0137682136397414	1.76772535075918	12.4661646103723	21	236	cardiac muscle tissue development	0.0889830508474576
GO:0030029	1.12091861677464e-05	1.80929327255891	42.1525396571062	71	798	actin filament-based process	0.0889724310776942
GO:0002376	3.36281090531118e-18	2.00427564714604	148.48469796507	250	2811	immune system process	0.0889363215937389
GO:0006950	4.0453677269784e-26	2.14360640020866	203.367515889548	342	3850	response to stress	0.0888311688311688
GO:0090287	0.00591481823457275	1.76879920742737	16.0581103455643	27	304	regulation of cellular response to growth factor stimulus	0.0888157894736842
GO:0051651	0.0188708703104693	1.76178165477135	11.3040645195749	19	214	maintenance of location in cell	0.088785046728972
GO:1902903	0.00220763467343868	1.77347394950419	20.231106126155	34	383	regulation of supramolecular fiber organization	0.0887728459530026
GO:1902533	1.42922793770383e-06	1.81750525804886	51.1852267264861	86	969	positive regulation of intracellular signal transduction	0.0887512899896801
GO:0001822	0.00690063265392433	1.7662579097001	15.4770603001656	26	293	kidney development	0.0887372013651877
GO:0022610	1.38187158034882e-09	1.86175613360518	79.1812743684239	133	1499	biological adhesion	0.0887258172114743
GO:0032880	7.17927279515104e-06	1.80535807031137	44.6880307643006	75	846	regulation of protein localization	0.0886524822695035
GO:0051090	0.00112410524569026	1.77447696548103	23.2420018159483	39	440	regulation of DNA-binding transcription factor activity	0.0886363636363636
GO:0030036	4.13320972726237e-05	1.79101758145943	37.6097847567163	63	712	actin cytoskeleton organization	0.0884831460674157
GO:0010948	0.00720270148844974	1.75956665271772	15.5298830315655	26	294	negative regulation of cell cycle process	0.0884353741496599
GO:0001667	0.000775966483141264	1.77207713186896	25.0907974149442	42	475	ameboidal-type cell migration	0.0884210526315789
GO:0097696	0.0304852138028722	1.75093587467688	9.56091438337873	16	181	receptor signaling pathway via STAT	0.0883977900552486
GO:0031669	0.0197147643327011	1.75269303597728	11.3568872509747	19	215	cellular response to nutrient levels	0.0883720930232558
GO:1901988	0.0128410317810292	1.75461598385488	13.1528601185707	22	249	negative regulation of cell cycle phase transition	0.0883534136546185
GO:0051640	0.000460419341115469	1.77242618741977	27.5206430593388	46	521	organelle localization	0.0882917466410749
GO:0033043	3.74506367933212e-07	1.81587945185861	58.0521818084709	97	1099	regulation of organelle organization	0.0882620564149227
GO:0007259	0.0358526311741848	1.74660528581837	8.97986433798003	15	170	receptor signaling pathway via JAK-STAT	0.0882352941176471
GO:0035966	0.0422254271764516	1.74179310344828	8.39881429258132	14	159	response to topologically incorrect protein	0.0880503144654088
GO:0015850	0.00877162274959807	1.74976769893782	15.0016557175666	25	284	organic hydroxy compound transport	0.0880281690140845
GO:0048017	0.0318540432643452	1.74028900803626	9.61373711477861	16	182	inositol lipid-mediated signaling	0.0879120879120879
GO:0010628	2.99888130863641e-07	1.80931140832829	60.1122683330663	100	1138	positive regulation of gene expression	0.0878734622144113
GO:0002181	0.0498131130419221	1.7363919247116	7.81776424718261	13	148	cytoplasmic translation	0.0878378378378378
GO:0007155	3.61114358419193e-09	1.836767322807	78.8115152486247	131	1492	cell adhesion	0.0878016085790885
GO:0007204	0.00600886485089456	1.74647685865597	16.8504513165625	28	319	positive regulation of cytosolic calcium ion concentration	0.0877742946708464
GO:1901214	0.00600886485089456	1.74647685865597	16.8504513165625	28	319	regulation of neuron death	0.0877742946708464
GO:0009314	0.00118941418289252	1.75468104077166	24.0871655183464	40	456	response to radiation	0.087719298245614
GO:0001933	0.00461076696278243	1.74681158257801	18.0653741387598	30	342	negative regulation of protein phosphorylation	0.087719298245614
GO:0002440	0.00700749576682707	1.74322104749151	16.2694012711638	27	308	production of molecular mediator of immune response	0.0876623376623377
GO:0060627	0.000542871334232317	1.75721778094608	27.7319339849383	46	525	regulation of vesicle-mediated transport	0.0876190476190476
GO:0008016	0.0251921088928804	1.73010934110481	10.8814826683758	18	206	regulation of heart contraction	0.087378640776699
GO:0010638	0.000764831654752611	1.74846100759144	26.6226566255408	44	504	positive regulation of organelle organization	0.0873015873015873
GO:0043067	5.24099078191833e-09	1.82369795654467	79.2869198312236	131	1501	regulation of programmed cell death	0.0872751499000666
GO:0051051	0.00115560949493503	1.7445757477403	24.8266837579448	41	470	negative regulation of transport	0.0872340425531915
GO:0001678	0.0391290619495631	1.72415935337894	9.08550980077979	15	172	cellular glucose homeostasis	0.0872093023255814
GO:0051656	0.00295423745767869	1.73790222954291	20.6008652459542	34	390	establishment of organelle localization	0.0871794871794872
GO:0030073	0.0295612375519749	1.72499653211264	10.3004326229771	17	195	insulin secretion	0.0871794871794872
GO:0030705	0.0295612375519749	1.72499653211264	10.3004326229771	17	195	cytoskeleton-dependent intracellular transport	0.0871794871794872
GO:0031329	2.25514364942983e-05	1.7661846698058	43.0505260909042	71	815	regulation of cellular catabolic process	0.0871165644171779
GO:0140014	0.00994538045098862	1.72943524120237	15.1601239117663	25	287	mitotic nuclear division	0.0871080139372822
GO:0009894	4.56975019494938e-06	1.77578848544823	50.340063024088	83	953	regulation of catabolic process	0.087093389296957
GO:0022407	0.00156368495146752	1.73896538412045	23.6645836671474	39	448	regulation of cell-cell adhesion	0.0870535714285714
GO:0000226	0.000250370622962644	1.74943506733075	32.1690434225284	53	609	microtubule cytoskeleton organization	0.0870279146141215
GO:0043434	0.00236523065241664	1.73447259281467	21.8686107995514	36	414	response to peptide hormone	0.0869565217391304
GO:0007548	0.0116114799547468	1.72533925487293	14.5790738663676	24	276	sex differentiation	0.0869565217391304
GO:0051650	0.0460896250452022	1.71789987789988	8.50445975538108	14	161	establishment of vesicle localization	0.0869565217391304
GO:0071396	0.000393659522570476	1.74200366865487	30.4258932863323	50	576	cellular response to lipid	0.0868055555555556
GO:0071674	0.0308428638054548	1.71526197209003	10.353255354377	17	196	mononuclear cell migration	0.086734693877551
GO:0050900	0.00417056168028944	1.72616578142005	19.4915878865566	32	369	leukocyte migration	0.0867208672086721
GO:0010469	0.0408454028650816	1.71314948145453	9.13833253217967	15	173	regulation of signaling receptor activity	0.0867052023121387
GO:0007010	2.4353895821273e-08	1.80148725515354	74.9554558564333	123	1419	cytoskeleton organization	0.0866807610993657
GO:0051338	1.6197230286748e-05	1.75763582092855	45.7444853922982	75	866	regulation of transferase activity	0.0866050808314088
GO:0097435	7.06812710363351e-05	1.74590116743963	39.088821235913	64	740	supramolecular fiber organization	0.0864864864864865
GO:0043254	0.00229296746746037	1.72390068559393	22.6081290391497	37	428	regulation of protein-containing complex assembly	0.0864485981308411
GO:0001775	1.98916654445796e-06	1.76486073816669	56.3090316722747	92	1066	cell activation	0.0863039399624766
GO:0008219	6.94905296428954e-12	1.84997386001702	111.403140522352	182	2109	cell death	0.0862968231389284
GO:0012501	4.85796121926123e-11	1.8357650906118	103.47973081237	169	1959	programmed cell death	0.0862685043389484
GO:0071375	0.0112436871695404	1.70956314100055	15.3185921059659	25	290	cellular response to peptide hormone stimulus	0.0862068965517241
GO:0032535	0.00403979049601944	1.71450089659295	20.231106126155	33	383	regulation of cellular component size	0.0861618798955614
GO:0060341	3.74781691346263e-05	1.74185762803211	42.9448806281045	70	813	regulation of cellular localization	0.0861008610086101
GO:0072001	0.0100332019667718	1.70778214215841	15.9524648827645	26	302	renal system development	0.0860927152317881
GO:0031345	0.0377832892445647	1.69895411401971	9.82502804037814	16	186	negative regulation of cell projection organization	0.0860215053763441
GO:0061024	3.89661031052918e-05	1.73941404284695	42.9977033595043	70	814	membrane organization	0.085995085995086
GO:0008406	0.02540469703867	1.70005103603144	11.673823639374	19	221	gonad development	0.085972850678733
GO:0051222	0.0104432124493599	1.70151939449149	16.0052876141644	26	303	positive regulation of protein transport	0.0858085808580858
GO:0022411	0.002308561981622	1.70970648180603	23.4004700101479	38	443	cellular component disassembly	0.0857787810383747
GO:0009605	2.1514239557315e-15	1.89750379084967	147.322597874272	239	2789	response to external stimulus	0.0856937970598781
GO:1901700	2.09042767294506e-09	1.79816262294483	90.0099343053998	146	1704	response to oxygen-containing compound	0.0856807511737089
GO:0010632	0.0121829123695618	1.69656316533793	15.4242375687657	25	292	regulation of epithelial cell migration	0.0856164383561644
GO:0001932	2.24181962806115e-06	1.74827093582367	58.0521818084709	94	1099	regulation of protein phosphorylation	0.0855323020928117
GO:0048588	0.0235327237531548	1.68976592112497	12.3605191475725	20	234	developmental cell growth	0.0854700854700855
GO:0009967	3.19036849616422e-08	1.77524503652713	78.4945788602254	127	1486	positive regulation of signal transduction	0.085464333781965
GO:0030155	0.000100258781647915	1.72205326494378	39.564225818512	64	749	regulation of cell adhesion	0.0854472630173565
GO:0014070	1.20960005658971e-05	1.73547322530982	50.0759493670886	81	948	response to organic cyclic compound	0.0854430379746835
GO:0006869	0.00406280948508042	1.69892411253668	21.0234470971532	34	398	lipid transport	0.085427135678392
GO:0098813	0.0142182879846532	1.69128848208705	14.843187523367	24	281	nuclear chromosome segregation	0.0854092526690391
GO:0010941	6.02529308884073e-09	1.78465645857872	86.6292794958073	140	1640	regulation of cell death	0.0853658536585366
GO:0009628	1.46459755946034e-06	1.74766928544706	60.6404956470651	98	1148	response to abiotic stimulus	0.0853658536585366
GO:0007346	0.00223096338668347	1.70063963737094	24.1399882497463	39	457	regulation of mitotic cell cycle	0.0853391684901532
GO:0043491	0.0310144638580436	1.68480760713542	11.1455963253752	18	211	protein kinase B signaling	0.0853080568720379
GO:0031400	0.00122749946403326	1.70282485875706	27.2565294023394	44	516	negative regulation of protein modification process	0.0852713178294574
GO:0050920	0.0275543212504131	1.6831918334344	11.7794691021738	19	223	regulation of chemotaxis	0.0852017937219731
GO:0042981	5.12687294244016e-08	1.76573574225752	77.5437696950275	125	1468	regulation of apoptotic process	0.085149863760218
GO:0016049	0.00185330126593308	1.69592745677737	25.4605565347434	41	482	cell growth	0.0850622406639004
GO:0045321	1.83810631522131e-05	1.72441628959276	49.0723174704908	79	929	leukocyte activation	0.085037674919268
GO:0034330	0.000212552692700939	1.70830750994835	36.6589755915185	59	694	cell junction organization	0.085014409221902
GO:0090130	0.00640103408924673	1.6857725050942	19.2802969609571	31	365	tissue migration	0.0849315068493151
GO:0007017	3.63389236303157e-05	1.71640029034334	46.0614217806975	74	872	microtubule-based process	0.0848623853211009
GO:0010876	0.00279963635753199	1.68836911082045	23.6645836671474	38	448	lipid localization	0.0848214285714286
GO:2001234	0.0286792103591623	1.67488559215489	11.8322918335737	19	224	negative regulation of apoptotic signaling pathway	0.0848214285714286
GO:0090068	0.0254895852099942	1.67392883079158	12.4661646103723	20	236	positive regulation of cell cycle process	0.0847457627118644
GO:1901987	0.00530467962677782	1.6802063921803	20.6008652459542	33	390	regulation of cell cycle phase transition	0.0846153846153846
GO:0006260	0.020170845876383	1.67246878068704	13.7339101639694	22	260	DNA replication	0.0846153846153846
GO:0007169	0.000502486757537266	1.69279907084785	33.1198525877263	53	627	transmembrane receptor protein tyrosine kinase signaling pathway	0.0845295055821372
GO:1903706	0.00691084407167766	1.67554553136495	19.3859424237569	31	367	regulation of hemopoiesis	0.0844686648501362
GO:0001525	0.000729897719843505	1.68900730540852	31.2710569887304	50	592	angiogenesis	0.0844594594594595
GO:0034284	0.0298382529591945	1.6666599939946	11.8851145649736	19	225	response to monosaccharide	0.0844444444444444
GO:1901698	3.0237191933515e-06	1.72386573767794	60.0594456016664	96	1137	response to nitrogen compound	0.0844327176781003
GO:0030900	0.00617027992416961	1.67545674372664	20.0198152005555	32	379	forebrain development	0.0844327176781003
GO:0051346	0.00617027992416961	1.67545674372664	20.0198152005555	32	379	negative regulation of hydrolase activity	0.0844327176781003
GO:0044093	7.46170240742068e-08	1.74807602814564	78.8643379800246	126	1493	positive regulation of molecular function	0.0843938379102478
GO:0007166	3.24315150079055e-14	1.852984219038	145.896384126475	233	2762	cell surface receptor signaling pathway	0.0843591600289645
GO:0010564	0.000416829108941713	1.69034860239814	34.4404208727234	55	652	regulation of cell cycle process	0.0843558282208589
GO:0045926	0.0235737308153416	1.66569704219226	13.1528601185707	21	249	negative regulation of growth	0.0843373493975904
GO:0006935	0.000677312161468087	1.68608992171684	31.9577524969289	51	605	chemotaxis	0.084297520661157
GO:1901699	0.000308918473619588	1.68857847584776	36.394861934519	58	689	cellular response to nitrogen compound	0.0841799709724238
GO:0032388	0.0394106467047589	1.65906462017573	10.6701917427763	17	202	positive regulation of intracellular transport	0.0841584158415842
GO:0010631	0.0083520072115564	1.6652476298897	18.8577151097581	30	357	epithelial cell migration	0.0840336134453782
GO:0045936	0.00378092967315385	1.66717800981779	23.2948245473482	37	441	negative regulation of phosphate metabolic process	0.0839002267573696
GO:0042330	0.000756640642418337	1.6767158054304	32.1162206911286	51	608	taxis	0.0838815789473684
GO:0042113	0.010897010972023	1.6594369971367	17.6427922875608	28	334	B cell activation	0.0838323353293413
GO:0002250	0.000246154431904616	1.68195051181306	38.4549484591145	61	728	adaptive immune response	0.0837912087912088
GO:0001568	0.000175582923275919	1.6836694980695	40.3565667895102	64	764	blood vessel development	0.0837696335078534
GO:0045859	0.000627125901092321	1.67470159151194	33.4367889761256	53	633	regulation of protein kinase activity	0.0837282780410742
GO:0007015	0.00392354775914402	1.66296555659301	23.3476472787481	37	442	actin filament organization	0.083710407239819
GO:0010563	0.00392354775914402	1.66296555659301	23.3476472787481	37	442	negative regulation of phosphorus metabolic process	0.083710407239819
GO:0045137	0.0322610716766494	1.65044607454401	11.9907600277733	19	227	development of primary sexual characteristics	0.0837004405286344
GO:0051493	0.00178538919326227	1.6665305495181	27.7847567163382	44	526	regulation of cytoskeleton organization	0.0836501901140684
GO:0051347	0.00142640808101646	1.66763453348819	29.0525022699354	46	550	positive regulation of transferase activity	0.0836363636363636
GO:0043549	0.000211341257298395	1.67802164828261	39.8283394755114	63	754	regulation of kinase activity	0.0835543766578249
GO:0008285	0.000168680575796252	1.67933340619175	41.0960850291086	65	778	negative regulation of cell population proliferation	0.083547557840617
GO:0061061	0.000699247398230134	1.66579254079254	33.5952571703253	53	636	muscle structure development	0.0833333333333333
GO:0009896	0.0026905415309276	1.65736478711162	25.9887838487422	41	492	positive regulation of catabolic process	0.0833333333333333
GO:0001503	0.00592801666328951	1.65254640647311	21.5516744111521	34	408	ossification	0.0833333333333333
GO:0042692	0.0074384132033564	1.65118267312625	20.2839288575549	32	384	muscle cell differentiation	0.0833333333333333
GO:0090132	0.00934129290577329	1.64982462792682	19.0161833039577	30	360	epithelium migration	0.0833333333333333
GO:0042326	0.00771639754513377	1.64641037709319	20.3367515889548	32	385	negative regulation of phosphorylation	0.0831168831168831
GO:0010038	0.00864683275438835	1.64558229254416	19.7028788121562	31	373	response to metal ion	0.0831099195710456
GO:0060562	0.0136690608967971	1.64217444083216	17.1673877049618	27	325	epithelial tube morphogenesis	0.0830769230769231
GO:0030522	0.0244260470108681	1.6375877198582	13.9980238209689	22	265	intracellular receptor signaling pathway	0.0830188679245283
GO:0009743	0.0274741756297253	1.63660408948418	13.3641510441703	21	253	response to carbohydrate	0.08300395256917
GO:0006915	3.9198161273935e-09	1.74102883262137	100.574480585376	158	1904	apoptotic process	0.0829831932773109
GO:0071363	0.000496831410868004	1.66041283466176	36.2892164717193	57	687	cellular response to growth factor stimulus	0.0829694323144105
GO:0001649	0.0348272593443562	1.63454099165439	12.0964054905731	19	229	osteoblast differentiation	0.0829694323144105
GO:0033157	0.0348272593443562	1.63454099165439	12.0964054905731	19	229	regulation of intracellular protein transport	0.0829694323144105
GO:0070374	0.0392563562022202	1.63345046550984	11.4625327137745	18	217	positive regulation of ERK1 and ERK2 cascade	0.0829493087557604
GO:0006816	0.00569333669607145	1.6444969907746	22.2911926507504	35	422	calcium ion transport	0.0829383886255924
GO:0001655	0.012640855851123	1.6376489543822	17.8540832131603	28	338	urogenital system development	0.0828402366863905
GO:0035556	2.12493816500677e-12	1.79183979453793	139.18789723869	218	2635	intracellular signal transduction	0.0827324478178368
GO:0032879	3.21644892206725e-13	1.80584373544804	148.16776157667	232	2805	regulation of localization	0.0827094474153298
GO:0051336	2.21367920177374e-05	1.67515224118998	54.9356406558778	86	1040	regulation of hydrolase activity	0.0826923076923077
GO:0060548	3.12155228866167e-05	1.67238197275732	53.034022325482	83	1004	negative regulation of cell death	0.0826693227091633
GO:0140352	0.000118052290509154	1.66324662972916	45.3747262724991	71	859	export from cell	0.0826542491268917
GO:0001934	0.000394334204675262	1.65517508897487	38.3493029963147	60	726	positive regulation of protein phosphorylation	0.0826446280991736
GO:0010243	2.04453224072804e-05	1.67423668590159	55.6223361640763	87	1053	response to organonitrogen compound	0.0826210826210826
GO:0019725	6.93438578697998e-05	1.6658274632351	48.5969128878919	76	920	cellular homeostasis	0.0826086956521739
GO:0043069	7.76881559699529e-05	1.66487820511137	47.9630401110933	75	908	negative regulation of programmed cell death	0.0825991189427313
GO:0001944	0.000215177083662222	1.65613256145551	42.258185119906	66	800	vasculature development	0.0825
GO:1902105	0.023398344835182	1.62555803571429	14.7375420605672	23	279	regulation of leukocyte differentiation	0.0824372759856631
GO:0043066	0.00010456026727409	1.65868098637318	46.8009400202959	73	886	negative regulation of apoptotic process	0.082392776523702
GO:0048468	1.34564988674477e-09	1.73700594882852	109.659990386156	171	2076	cell development	0.0823699421965318
GO:0071310	4.11435037874463e-11	1.76215543710265	127.672541793516	199	2417	cellular response to organic substance	0.0823334712453455
GO:0016358	0.0333223743745603	1.62073609240722	12.8359237301714	20	243	dendrite development	0.0823045267489712
GO:0042127	4.21490757280265e-08	1.71033667563381	91.8059071729958	143	1738	regulation of cell population proliferation	0.0822784810126582
GO:0031667	0.0041793490351717	1.63257350272232	25.0379746835443	39	474	response to nutrient levels	0.0822784810126582
GO:0048871	0.00308725142199556	1.63264984475721	26.99241574534	42	511	multicellular organismal homeostasis	0.0821917808219178
GO:0009746	0.0423284809373508	1.61701277341408	11.5681781765743	18	219	response to hexose	0.0821917808219178
GO:0070925	0.000140604061044879	1.6522719217994	45.6388399294985	71	864	organelle assembly	0.0821759259259259
GO:0070848	0.000507598885633979	1.64378253136881	37.9267211451156	59	718	response to growth factor	0.0821727019498607
GO:0051130	2.82867988586791e-05	1.66225657796938	55.305399775677	86	1047	positive regulation of cellular component organization	0.0821394460362942
GO:0031399	4.76632407455837e-07	1.68982322065925	79.128451637024	123	1498	regulation of protein modification process	0.082109479305741
GO:0043085	1.35569008969911e-05	1.66610362293956	59.8481546760669	93	1133	positive regulation of catalytic activity	0.0820829655781112
GO:0000902	5.18604867663959e-05	1.65500220992865	52.1888586230839	81	988	cell morphogenesis	0.0819838056680162
GO:0040013	0.00957112596732702	1.61833491965084	20.6536879773541	32	391	negative regulation of locomotion	0.0818414322250639
GO:0009914	0.020657257184995	1.61074482066124	16.163755808364	25	306	hormone transport	0.0816993464052288
GO:0006974	0.000317697316683121	1.63624963727563	42.0468941943065	65	796	cellular response to DNA damage stimulus	0.0816582914572864
GO:0030855	0.00123575899811048	1.6268469109451	33.6480799017252	52	637	epithelial cell differentiation	0.0816326530612245
GO:1904951	0.0190601232738898	1.60712931361396	16.8504513165625	26	319	positive regulation of establishment of protein localization	0.0815047021943574
GO:0006468	5.23082125544501e-07	1.67609838517259	81.7167654756182	126	1547	protein phosphorylation	0.081447963800905
GO:0031401	7.99638787597725e-05	1.64107127440461	51.238049457886	79	970	positive regulation of protein modification process	0.0814432989690722
GO:0009725	0.000207106325352968	1.63369650555777	45.4275490038989	70	860	response to hormone	0.0813953488372093
GO:0031668	0.0371789366172671	1.59894791638127	12.9943919243711	20	246	cellular response to extracellular stimulus	0.0813008130081301
GO:0046903	0.000116269323414535	1.63528492209923	49.3892538588901	76	935	secretion	0.081283422459893
GO:0051239	7.75591600888692e-12	1.75473341028289	144.364524915879	222	2733	regulation of multicellular organismal process	0.0812294182217344
GO:0070887	3.68825475501177e-13	1.77450898582085	161.74320354644	248	3062	cellular response to chemical stimulus	0.0809928151534944
GO:0032102	0.00906694663352804	1.60006510593278	22.1855471879507	34	420	negative regulation of response to external stimulus	0.080952380952381
GO:0042325	1.02726199013357e-05	1.64479900563161	65.9227687870534	101	1248	regulation of phosphorylation	0.0809294871794872
GO:0044089	0.00406638473073763	1.60452405145677	27.414997596539	42	519	positive regulation of cellular component biogenesis	0.0809248554913295
GO:0007159	0.0138243888682523	1.59559536296056	19.5972333493564	30	371	leukocyte cell-cell adhesion	0.0808625336927224
GO:0032940	0.000465538079512024	1.61625185625186	41.8356032687069	64	792	secretion by cell	0.0808080808080808
GO:0014706	0.0127598691990298	1.59329516757645	20.2839288575549	31	384	striated muscle tissue development	0.0807291666666667
GO:0051726	7.3345075149665e-05	1.62576480965515	54.3545906104791	83	1029	regulation of cell cycle	0.0806608357628766
GO:0032970	0.0117779892385199	1.59118249094631	20.9706243657534	32	397	regulation of actin filament-based process	0.0806045340050378
GO:0042327	0.000459502826630042	1.61094969720307	42.6279442397052	65	807	positive regulation of phosphorylation	0.080545229244114
GO:0010720	0.0267148195234494	1.58481146703982	15.741173957165	24	298	positive regulation of cell development	0.0805369127516778
GO:0055082	0.000379315897955133	1.61190223016177	43.9485125247022	67	832	cellular chemical homeostasis	0.0805288461538462
GO:0030072	0.044999774498577	1.58118200389567	12.4661646103723	19	236	peptide hormone secretion	0.0805084745762712
GO:0044092	2.63031424184145e-05	1.62920424872299	61.6969502750628	94	1168	negative regulation of molecular function	0.0804794520547945
GO:0051128	2.50273521717152e-09	1.69604403045428	118.851145649736	181	2250	regulation of cellular component organization	0.0804444444444444
GO:0008104	3.7338475348892e-10	1.70955367085004	130.102387437911	198	2463	protein localization	0.0803897685749086
GO:0006874	0.00827371861301324	1.58821911388665	23.6645836671474	36	448	cellular calcium ion homeostasis	0.0803571428571429
GO:1903037	0.0201980047522622	1.5827160244636	17.7484377503605	27	336	regulation of leukocyte cell-cell adhesion	0.0803571428571429
GO:0010647	4.28094394101586e-07	1.65523478281945	88.7950114832025	135	1681	positive regulation of cell communication	0.0803093396787626
GO:1902531	3.92391327172423e-07	1.65536421329537	89.481706991401	136	1694	regulation of intracellular signal transduction	0.0802833530106257
GO:1901990	0.0276518317039102	1.57895807819124	15.7939966885649	24	299	regulation of mitotic cell cycle phase transition	0.0802675585284281
GO:0006511	0.0019982190567422	1.59386036848723	33.5952571703253	51	636	ubiquitin-dependent protein catabolic process	0.080188679245283
GO:0048514	0.00136361016948587	1.59609504644068	36.2363937403194	55	686	blood vessel morphogenesis	0.0801749271137026
GO:0032386	0.0208959042407532	1.5775199517135	17.8012604817604	27	337	regulation of intracellular transport	0.0801186943620178
GO:0023056	5.22209883717828e-07	1.64822454670562	89.1119478716018	135	1687	positive regulation of signaling	0.0800237107291049
GO:0035295	5.48548954083804e-05	1.61370442708333	58.7917000480692	89	1113	tube development	0.0799640610961366
GO:0060284	0.00621620058237394	1.57928542203347	26.4641884313411	40	501	regulation of cell development	0.0798403193612774
GO:0006913	0.029600990321935	1.56737808870017	15.8996421513646	24	301	nucleocytoplasmic transport	0.079734219269103
GO:0051169	0.029600990321935	1.56737808870017	15.8996421513646	24	301	nuclear transport	0.079734219269103
GO:0001558	0.0124231307011238	1.57219220505387	21.8686107995514	33	414	regulation of cell growth	0.0797101449275362
GO:0006873	0.00187936459017103	1.58417476677281	35.1271163809219	53	665	cellular ion homeostasis	0.0796992481203008
GO:0003015	0.0443221980859473	1.56389190444918	13.2585055813705	20	251	heart process	0.0796812749003984
GO:0043086	0.000745513233529435	1.58927978069447	41.7827805373071	63	791	negative regulation of catalytic activity	0.079646017699115
GO:0019220	7.55364942463846e-06	1.62104140885631	73.6348875714362	111	1394	regulation of phosphate metabolic process	0.0796269727403156
GO:0051174	7.55364942463846e-06	1.62104140885631	73.6348875714362	111	1394	regulation of phosphorus metabolic process	0.0796269727403156
GO:0031331	0.0114607315121014	1.57093108455564	22.5553063077498	34	427	positive regulation of cellular catabolic process	0.0796252927400468
GO:0032868	0.0407211325782464	1.56153708805224	13.945201089569	21	264	response to insulin	0.0795454545454545
GO:0007517	0.0250871432100511	1.56369733287795	17.2730331677616	26	327	muscle organ development	0.0795107033639144
GO:0098609	0.000368640866522606	1.59125147761186	47.1706991400951	71	893	cell-cell adhesion	0.0795072788353863
GO:0010033	4.1429485320871e-12	1.72914984782502	162.799658174438	245	3082	response to organic substance	0.0794938351719663
GO:0060537	0.0143831695576481	1.56490830791416	21.2875607541526	32	403	muscle tissue development	0.0794044665012407
GO:0051247	5.28119083793439e-06	1.61910090828958	77.1740105752283	116	1461	positive regulation of protein metabolic process	0.0793976728268309
GO:0032270	1.04875672965984e-05	1.61395102128884	72.5256102120387	109	1373	positive regulation of cellular protein metabolic process	0.079388201019665
GO:0043269	0.00170855614252393	1.57793694159344	36.6061528601186	55	693	regulation of ion transport	0.0793650793650794
GO:0030163	0.00024645289474378	1.59047072644319	50.6041766810874	76	958	protein catabolic process	0.0793319415448852
GO:0051480	0.0212813202855096	1.56072040342592	18.6464241841585	28	353	regulation of cytosolic calcium ion concentration	0.0793201133144476
GO:0045596	0.00191008289052736	1.57575416421462	35.97228008332	54	681	negative regulation of cell differentiation	0.079295154185022
GO:0000278	0.000439312355602521	1.58532390546974	46.6424718260962	70	883	mitotic cell cycle	0.0792751981879955
GO:0000904	0.00176362616248307	1.57537540254614	36.6589755915185	55	694	cell morphogenesis involved in differentiation	0.0792507204610951
GO:0009991	0.00707528584474343	1.56533759361864	26.6754793569407	40	505	response to extracellular stimulus	0.0792079207920792
GO:0032269	0.00013541789647515	1.59195118324583	55.3582225070769	83	1048	negative regulation of cellular protein metabolic process	0.0791984732824427
GO:0022603	0.000242101883320792	1.58663993969298	51.3965176520857	77	973	regulation of anatomical structure morphogenesis	0.079136690647482
GO:0044087	0.000302997952984861	1.58292816047349	50.1287720984885	75	949	regulation of cellular component biogenesis	0.0790305584826133
GO:0050863	0.0268024222723763	1.55319768736998	17.3786786305613	26	329	regulation of T cell activation	0.0790273556231003
GO:0051271	0.0202569535497236	1.55474605522682	19.3859424237569	29	367	negative regulation of cellular component movement	0.0790190735694823
GO:0019941	0.00275375470466622	1.5661590009138	34.1234844843241	51	646	modification-dependent protein catabolic process	0.0789473684210526
GO:0007167	0.00028832828465063	1.58103604332262	50.8682903380868	76	963	enzyme linked receptor protein signaling pathway	0.078920041536864
GO:0071417	0.00307810030469185	1.56370811268181	33.4896117075255	50	634	cellular response to organonitrogen compound	0.0788643533123028
GO:0002263	0.0400166605622185	1.54714126485299	14.7375420605672	22	279	cell activation involved in immune response	0.0788530465949821
GO:0043542	0.0400166605622185	1.54714126485299	14.7375420605672	22	279	endothelial cell migration	0.0788530465949821
GO:0033036	6.10895702389712e-11	1.69471668356427	154.242375687657	230	2920	macromolecule localization	0.0787671232876712
GO:0051248	0.000105242218247145	1.58394879475879	59.0558137050686	88	1118	negative regulation of protein metabolic process	0.0787119856887299
GO:0030003	0.00293155425843523	1.56073008968081	34.2291299471239	51	648	cellular cation homeostasis	0.0787037037037037
GO:0034613	1.21722519994073e-06	1.61549098525274	91.3305025903968	136	1729	cellular protein localization	0.0786581839213418
GO:0051241	0.000108548140634503	1.58231773942306	59.1086364364685	88	1119	negative regulation of multicellular organismal process	0.0786416443252904
GO:1903047	0.00175761311347598	1.56247911901519	38.2964802649148	57	725	mitotic cell cycle process	0.0786206896551724
GO:0065008	3.26620671225477e-14	1.75486655010392	198.243710943759	295	3753	regulation of biological quality	0.0786037836397549
GO:0007005	0.00803185356208037	1.55162768125352	26.8867702825402	40	509	mitochondrion organization	0.0785854616895874
GO:0071407	0.0048050173049975	1.55320686540199	30.9541206003311	46	586	cellular response to organic cyclic compound	0.0784982935153584
GO:0051649	1.0268002135148e-07	1.63011335259421	109.765635848956	163	2078	establishment of localization in cell	0.0784408084696824
GO:0044257	0.00111982898875687	1.56020409055535	42.4694760455055	63	804	cellular protein catabolic process	0.0783582089552239
GO:0050708	0.0465421568355678	1.53589771472547	14.1564920151685	21	268	regulation of protein secretion	0.0783582089552239
GO:0035239	0.000510004170641911	1.56542495870344	48.544090156492	72	919	tube morphogenesis	0.0783460282916213
GO:0033554	5.90224299566577e-07	1.61456740920572	98.461571329381	146	1864	cellular response to stress	0.0783261802575107
GO:0048646	8.83593220522509e-05	1.5769112389611	62.0667093948619	92	1175	anatomical structure formation involved in morphogenesis	0.0782978723404255
GO:0055074	0.0121939710009291	1.54220039992873	24.2984564439459	36	460	calcium ion homeostasis	0.0782608695652174
GO:0007417	0.000274768267185326	1.56532602412784	54.0904769534797	80	1024	central nervous system development	0.078125
GO:0016042	0.033167013753619	1.53307194598776	16.9032740479624	25	320	lipid catabolic process	0.078125
GO:0051345	0.00527100794260496	1.54435610654449	31.1125887945308	46	589	positive regulation of hydrolase activity	0.0780984719864177
GO:0070727	1.8237366093659e-06	1.60112357089986	92.0171980985953	136	1742	cellular macromolecule localization	0.0780711825487945
GO:0098771	0.00189071632826965	1.55055312943464	39.2472894301127	58	743	inorganic ion homeostasis	0.0780619111709287
GO:0072359	9.97803689367483e-05	1.57073101691317	62.2780003204615	92	1179	circulatory system development	0.0780322307039864
GO:0051052	0.0258215104570817	1.5319012483849	18.9633605725578	28	359	regulation of DNA metabolic process	0.0779944289693593
GO:2000146	0.0258215104570817	1.5319012483849	18.9633605725578	28	359	negative regulation of cell motility	0.0779944289693593
GO:0060322	0.00137063858962621	1.55125233446801	41.9940714629066	62	795	head development	0.0779874213836478
GO:1901565	4.22656290502054e-05	1.57597581427698	69.0921326710463	102	1308	organonitrogen compound catabolic process	0.0779816513761468
GO:0046879	0.0405429294623692	1.52853641456583	15.5827057629653	23	295	hormone secretion	0.0779661016949153
GO:0048285	0.0110282496567637	1.53474003972427	25.7774929231427	38	488	organelle fission	0.0778688524590164
GO:0043632	0.00386030470085499	1.5367434398024	34.7045345297228	51	657	modification-dependent macromolecule catabolic process	0.0776255707762557
GO:0003006	0.000432759197703191	1.5519401303806	52.4001495486834	77	992	developmental process involved in reproduction	0.0776209677419355
GO:0042592	1.90350107909218e-06	1.59193704600484	94.6055119371895	139	1791	homeostatic process	0.0776102735901731
GO:0006875	0.00645193824006631	1.53246277522572	30.6371842119318	45	580	cellular metal ion homeostasis	0.0775862068965517
GO:0120031	0.00918919602266957	1.52842481151	27.9432249105378	41	529	plasma membrane bounded cell projection assembly	0.0775047258979206
GO:0050808	0.0181841823245211	1.52313232616819	22.5024835763499	33	426	synapse organization	0.0774647887323944
GO:0051603	0.0022637755470297	1.53654862813432	39.564225818512	58	749	proteolysis involved in cellular protein catabolic process	0.0774365821094793
GO:2000026	3.64375042856166e-05	1.56606020185852	73.0010147946376	107	1382	regulation of multicellular organismal development	0.077424023154848
GO:0048878	0.000131397920189496	1.55299581297415	63.5985686054585	93	1204	chemical homeostasis	0.0772425249169435
GO:0044770	0.0105836790520371	1.5216193218142	27.3621748651391	40	518	cell cycle phase transition	0.0772200772200772
GO:0048534	0.00116185738650085	1.53619120351188	45.850130855098	67	868	hematopoietic or lymphoid organ development	0.0771889400921659
GO:0007420	0.00247336756567096	1.52963718476925	39.7226940127116	58	752	brain development	0.0771276595744681
GO:0033674	0.0151087658699646	1.51653953932264	24.6682155637451	36	467	positive regulation of kinase activity	0.0770877944325482
GO:0051641	1.85244168051704e-09	1.6368865466391	148.748811622069	217	2816	cellular localization	0.0770596590909091
GO:0048729	0.00618491995129327	1.52171789737266	32.2218661539283	47	610	tissue morphogenesis	0.0770491803278689
GO:0051094	7.83659047923639e-05	1.55048798798799	69.3562463280457	101	1313	positive regulation of developmental process	0.0769230769230769
GO:0001501	0.0121859610042659	1.51456140350877	26.7811248197404	39	507	skeletal system development	0.0769230769230769
GO:0055080	0.00317224647031991	1.52158354156414	38.5077711905143	56	729	cation homeostasis	0.0768175582990398
GO:0016310	3.07415900634256e-06	1.57267261403616	96.2958393419858	140	1823	phosphorylation	0.0767964893033461
GO:0032870	0.00771118889157383	1.51493820295122	30.9541206003311	45	586	cellular response to hormone stimulus	0.0767918088737201
GO:0048583	4.14084396592846e-13	1.70428372739917	205.691716071142	299	3894	regulation of response to stimulus	0.0767847971237802
GO:0051049	4.89627673212038e-06	1.56814209573032	92.9151845323933	135	1759	regulation of transport	0.0767481523592951
GO:0050790	6.45137062697304e-08	1.60144469525959	126.721732628318	184	2399	regulation of catalytic activity	0.0766986244268445
GO:0010562	0.00127552015507749	1.52488602000003	46.8537627516958	68	887	positive regulation of phosphorus metabolic process	0.076662908680947
GO:0045937	0.00127552015507749	1.52488602000003	46.8537627516958	68	887	positive regulation of phosphate metabolic process	0.076662908680947
GO:0000003	2.96554553134192e-05	1.55077220809775	79.3397425626235	115	1502	reproduction	0.0765645805592543
GO:0046649	0.00279459240621775	1.51448370507774	40.7791486407093	59	772	lymphocyte activation	0.0764248704663212
GO:0042886	0.0489176750028234	1.49503254539226	15.8996421513646	23	301	amide transport	0.0764119601328904
GO:1902532	0.0119852678999734	1.49996391853229	28.4186294931368	41	538	negative regulation of intracellular signal transduction	0.0762081784386617
GO:0034329	0.0243576738704766	1.49487767831173	22.1855471879507	32	420	cell junction assembly	0.0761904761904762
GO:0055065	0.00611817294983314	1.5024395892437	34.7045345297228	50	657	metal ion homeostasis	0.076103500761035
GO:0022414	4.29193998868996e-05	1.53793584321815	79.1812743684239	114	1499	reproductive process	0.076050700466978
GO:0030097	0.00233128795834746	1.5070631425204	43.7900443305026	63	829	hemopoiesis	0.0759951749095295
GO:0050801	0.0029701434974864	1.50440155123347	41.7299578059072	60	790	ion homeostasis	0.0759493670886076
GO:0051246	4.946203910802e-08	1.58977571992217	135.648774234898	195	2568	regulation of protein metabolic process	0.0759345794392523
GO:0051223	0.0149425537825383	1.49163656509695	27.1508839395396	39	514	regulation of protein transport	0.075875486381323
GO:0065009	1.74385474536353e-09	1.61389036339234	163.275062757037	234	3091	regulation of molecular function	0.0757036557748302
GO:0002520	0.00152193108519811	1.50370667328459	48.8610265448913	70	925	immune system development	0.0756756756756757
GO:0008283	2.53689838609937e-06	1.55265394461462	106.120867382364	152	2009	cell population proliferation	0.0756595321055251
GO:0002521	0.0134351608015913	1.48764285774443	28.6299204187363	41	542	leukocyte differentiation	0.0756457564575646
GO:0001818	0.0392205526406542	1.48021168021168	18.8577151097581	27	357	negative regulation of cytokine production	0.0756302521008403
GO:1904062	0.0392205526406542	1.48021168021168	18.8577151097581	27	357	regulation of cation transmembrane transport	0.0756302521008403
GO:0030336	0.0426826099580622	1.4786601095894	18.1710196015596	26	344	negative regulation of cell migration	0.0755813953488372
GO:0030031	0.0138192104413137	1.4845932724797	28.6827431501362	41	543	cell projection assembly	0.0755064456721915
GO:0045597	0.00234363472991463	1.49689192716831	45.4803717352988	65	861	positive regulation of cell differentiation	0.0754936120789779
GO:0032268	2.66956579006607e-07	1.56705934344562	126.721732628318	181	2399	regulation of cellular protein metabolic process	0.0754481033764068
GO:0006508	1.53424368681265e-05	1.53312148689389	92.4926026811943	132	1751	proteolysis	0.0753854940034266
GO:0060429	0.000678134838382403	1.50117084361338	58.2634727340704	83	1103	epithelium development	0.0752493200362647
GO:0015031	4.38418116650353e-05	1.52104559020274	84.3050793142125	120	1596	protein transport	0.075187969924812
GO:0000280	0.0266469471397271	1.47325679658676	23.1891790845484	33	439	nuclear division	0.0751708428246014
GO:0045860	0.036144281936687	1.47039274042951	20.3895743203546	29	386	positive regulation of protein kinase activity	0.0751295336787565
GO:0009719	5.02299498629909e-05	1.51544418794566	84.5691929712119	120	1601	response to endogenous stimulus	0.0749531542785759
GO:0045184	3.73441679723411e-05	1.51052475060949	89.9571115739999	127	1703	establishment of protein localization	0.0745742806811509
GO:0051093	0.00210595111698719	1.47774171396954	50.340063024088	71	953	negative regulation of developmental process	0.074501573976915
GO:0040008	0.00975934369846121	1.46582293959403	34.7573572611227	49	658	regulation of growth	0.074468085106383
GO:0009966	2.92046483158219e-08	1.56788921691603	155.404475778454	219	2942	regulation of signal transduction	0.0744391570360299
GO:0006631	0.0404464754692415	1.45376558171745	20.6008652459542	29	390	fatty acid metabolic process	0.0743589743589744
GO:0009888	1.79682136814507e-05	1.51182043701363	98.7785077177803	139	1870	tissue development	0.074331550802139
GO:0050793	6.22978730770531e-07	1.53971638773264	130.049564706511	183	2462	regulation of developmental process	0.0743298131600325
GO:0070201	0.0191978376390716	1.45580940595627	28.4714522245367	40	539	regulation of establishment of protein localization	0.0742115027829314
GO:0007049	4.59088562488553e-05	1.500124569726	91.2248571275971	128	1727	cell cycle	0.0741169658367111
GO:0072503	0.0259307012465513	1.4509129066107	25.6718474603429	36	486	cellular divalent inorganic cation homeostasis	0.0740740740740741
GO:0045595	0.000123130768505326	1.48997842068688	82.0865245954174	115	1554	regulation of cell differentiation	0.074002574002574
GO:0022607	8.91560896893205e-08	1.54961159706922	151.442770923463	212	2867	cellular component assembly	0.0739448901290548
GO:0009653	2.72382846813205e-07	1.53855102610284	142.304438391283	199	2694	anatomical structure morphogenesis	0.0738678544914625
GO:0016567	0.00629194255084233	1.45077208063793	42.3638305827058	59	802	protein ubiquitination	0.0735660847880299
GO:0006886	0.00441878707797255	1.45102153943617	46.748117288896	65	885	intracellular protein transport	0.0734463276836158
GO:0032446	0.00505639580231712	1.44960674844126	45.3219035410992	63	858	protein modification by small protein conjugation	0.0734265734265734
GO:0072657	0.0196197493697321	1.43963658823295	30.2146023607328	42	572	protein localization to membrane	0.0734265734265734
GO:0051179	2.55476971435658e-18	1.78208458907324	328.821502964269	457	6225	localization	0.0734136546184739
GO:0048732	0.038058793606709	1.43435033158488	23.0307108903488	32	436	gland development	0.073394495412844
GO:0034765	0.0296054408771321	1.43455369394509	25.9359611173423	36	491	regulation of ion transmembrane transport	0.0733197556008147
GO:0044772	0.0424626895785603	1.42783417531222	22.3968381135502	31	424	mitotic cell cycle phase transition	0.0731132075471698
GO:0007507	0.0200491955836833	1.43090243090243	31.1125887945308	43	589	heart development	0.0730050933786078
GO:0009056	2.61426717148344e-06	1.49987865024863	132.056828499706	182	2500	catabolic process	0.0728
GO:0022402	0.00165787774314097	1.44280922474614	61.8025957378625	85	1170	cell cycle process	0.0726495726495727
GO:0032989	0.0111894629465237	1.4266077656359	39.3001121615126	54	744	cellular component morphogenesis	0.0725806451612903
GO:0051046	0.0193491013587659	1.42254053058217	32.7500934679272	45	620	regulation of secretion	0.0725806451612903
GO:0009057	0.000946976100118335	1.44475285626168	69.1977781338461	95	1310	macromolecule catabolic process	0.0725190839694656
GO:0044085	3.52315670755854e-07	1.5008685247271	164.754099236234	224	3119	cellular component biogenesis	0.071817890349471
GO:0023051	1.67557759911171e-07	1.50313690092413	176.480745607007	239	3341	regulation of signaling	0.071535468422628
GO:0023061	0.0499673932739291	1.38910187797996	24.4569246381456	33	463	signal release	0.0712742980561555
GO:0065003	0.000633698339188117	1.42350791146655	83.0373337606153	112	1572	protein-containing complex assembly	0.0712468193384224
GO:0031344	0.0244556178743119	1.3930081300813	34.1234844843241	46	646	regulation of cell projection organization	0.0712074303405573
GO:0010648	0.00152203497935184	1.41453609050787	71.9973828980398	97	1363	negative regulation of cell communication	0.0711665443873808
GO:0016043	5.03290048010377e-14	1.65210404019125	315.879933771297	425	5980	cellular component organization	0.0710702341137124
GO:0072507	0.0441149038600235	1.38453826668716	26.7811248197404	36	507	divalent inorganic cation homeostasis	0.0710059171597633
GO:0010646	3.9167238066092e-07	1.4858962767684	175.635581904609	236	3325	regulation of cell communication	0.0709774436090226
GO:0023057	0.00166642993098335	1.40973835669644	72.2086738236394	97	1367	negative regulation of signaling	0.0709583028529627
GO:0046907	0.00102335809771672	1.4137323311608	78.9171607114245	106	1494	intracellular transport	0.07095046854083
GO:0044248	8.19215797297179e-05	1.43250409044467	114.202745286546	153	2162	cellular catabolic process	0.0707678075855689
GO:0051234	5.70016699689977e-10	1.54731674403239	246.470864711852	330	4666	establishment of localization	0.0707243891984569
GO:0006796	8.51063083882381e-06	1.4523905788204	143.413715750681	192	2715	phosphate-containing compound metabolic process	0.0707182320441989
GO:0048585	0.000690989750027237	1.41129772000859	86.7349249586071	116	1642	negative regulation of response to stimulus	0.0706455542021924
GO:0071495	0.00213325503607447	1.40132438478747	71.046573732842	95	1345	cellular response to endogenous stimulus	0.0706319702602231
GO:0032787	0.0344144772270137	1.37791560290324	31.4295251829301	42	595	monocarboxylic acid metabolic process	0.0705882352941176
GO:0048869	1.08004841749994e-08	1.51477037944532	220.851839982909	295	4181	cellular developmental process	0.0705572829466635
GO:0032990	0.0280947032066095	1.37873299525074	34.4404208727234	46	652	cell part morphogenesis	0.0705521472392638
GO:0006793	9.38253623592765e-06	1.44838575496436	144.522993110079	193	2736	phosphorus metabolic process	0.0705409356725146
GO:0009968	0.00305491822787362	1.39616273562565	66.6622870266517	89	1262	negative regulation of signal transduction	0.0705229793977813
GO:0022008	0.00079969206604278	1.40660236616591	86.2066976446082	115	1632	neurogenesis	0.0704656862745098
GO:0048518	1.13265090066521e-13	1.63697095498343	324.859798109277	433	6150	positive regulation of biological process	0.0704065040650406
GO:0042221	3.16279302510097e-09	1.52498359392833	236.381723014474	315	4475	response to chemical	0.070391061452514
GO:0030154	2.60792336882647e-08	1.50196115589289	216.414730545319	288	4097	cell differentiation	0.0702953380522333
GO:0051301	0.0356173690289375	1.36874003189793	32.380334348128	43	613	cell division	0.0701468189233279
GO:1901575	0.00021769547735869	1.41197718725998	107.70554932436	143	2039	organic substance catabolic process	0.0701324178518882
GO:0006810	5.30154735100901e-09	1.51445187799536	238.38898680767	316	4513	transport	0.070019942388655
GO:0033365	0.0160415642986273	1.37070340005018	45.3219035410992	60	858	protein localization to organelle	0.0699300699300699
GO:0007283	0.0431950502626489	1.36289089425355	30.2146023607328	40	572	spermatogenesis	0.0699300699300699
GO:0048812	0.0372482002551909	1.36379529561348	32.4859798109277	43	615	neuron projection morphogenesis	0.0699186991869919
GO:0071840	4.27286508449254e-13	1.61728316398241	326.444480051274	432	6180	cellular component organization or biogenesis	0.0699029126213592
GO:0120039	0.0359889248973508	1.36250067717645	33.278320781926	44	630	plasma membrane bounded cell projection morphogenesis	0.0698412698412698
GO:0040007	0.0129647442719911	1.3702098517341	49.1779629332906	65	931	growth	0.0698174006444683
GO:0043933	0.000746513148177401	1.39475923893209	93.073652726593	123	1762	protein-containing complex subunit organization	0.0698070374574347
GO:0120036	0.00214212664895103	1.38311266160476	78.0719970090263	103	1478	plasma membrane bounded cell projection organization	0.0696887686062246
GO:0071705	0.000340374962614668	1.39632344127586	107.91684024996	142	2043	nitrogen compound transport	0.0695056289769946
GO:0034762	0.0445888902955352	1.35379439410359	31.1654115259307	41	590	regulation of transmembrane transport	0.0694915254237288
GO:0048232	0.0445888902955352	1.35379439410359	31.1654115259307	41	590	male gamete generation	0.0694915254237288
GO:0048858	0.0392869083825254	1.35294771769348	33.4896117075255	44	634	cell projection morphogenesis	0.0694006309148265
GO:1903530	0.0499793943734821	1.35096910536379	29.686375046734	39	562	regulation of secretion by cell	0.0693950177935943
GO:0034622	0.00920488802907278	1.36446093678628	57.101372643273	75	1081	cellular protein-containing complex assembly	0.0693802035152636
GO:0007276	0.0298988148600608	1.35405804761066	38.0851893393153	50	721	gamete generation	0.0693481276005548
GO:0018193	0.00570210607197904	1.36425269966542	66.4509961010522	87	1258	peptidyl-amino acid modification	0.0691573926868044
GO:0030001	0.0191772456322127	1.35239953016193	46.6424718260962	61	883	metal ion transport	0.0690826727066818
GO:0006996	1.64546652998588e-06	1.44000989676786	190.584414890776	249	3608	organelle organization	0.0690133037694013
GO:0044265	0.00952633989024614	1.35664669976192	58.9501682422689	77	1116	cellular macromolecule catabolic process	0.0689964157706093
GO:0030030	0.00266979170780538	1.36775243727587	80.3961971906212	105	1522	cell projection organization	0.068988173455979
GO:0048666	0.010488030035567	1.3527644358829	58.3162954654703	76	1104	neuron development	0.0688405797101449
GO:0048522	2.92561562632992e-10	1.52989463366822	297.603268706938	387	5634	positive regulation of cellular process	0.0686900958466454
GO:0031175	0.0178504543236909	1.34219155944155	50.8682903380868	66	963	neuron projection development	0.0685358255451713
GO:0120035	0.049279238548756	1.33247863247863	33.1726753191262	43	628	regulation of plasma membrane bounded cell projection organization	0.0684713375796178
GO:0019953	0.0253629997292192	1.3321956470372	46.4840036318966	60	880	sexual reproduction	0.0681818181818182
GO:0051704	0.0157138766689914	1.33219291625405	56.7316135234738	73	1074	multi-organism process	0.0679702048417132
GO:0044703	0.0185811278678207	1.32509545513275	55.4110452384767	71	1049	multi-organism reproductive process	0.0676835081029552
GO:0050896	1.75544241832936e-18	1.78047321751209	474.876355284944	608	8990	response to stimulus	0.0676307007786429
GO:0070647	0.0231236758002586	1.31901257010068	52.4529722800833	67	993	protein modification by small protein conjugation or removal	0.067472306143001
GO:0007399	0.000505293518024562	1.35457766706216	127.725364524916	163	2418	nervous system development	0.0674110835401158
GO:0007165	1.47012335196613e-09	1.49714529869535	315.246060994499	402	5968	signal transduction	0.0673592493297587
GO:0071702	0.000475462892034241	1.35350203391621	130.26085563211	166	2466	organic substance transport	0.0673154906731549
GO:0051716	1.13819889864054e-12	1.58806145214883	393.318058003525	500	7446	cellular response to stimulus	0.067150147730325
GO:0006464	2.81136386437544e-05	1.37636472705459	188.73561929178	239	3573	cellular protein modification process	0.066890568150014
GO:0036211	2.81136386437544e-05	1.37636472705459	188.73561929178	239	3573	protein modification process	0.066890568150014
GO:0048609	0.0399404167657452	1.30139161472599	45.0577898840998	57	853	multicellular organismal reproductive process	0.0668229777256741
GO:0048513	6.47150207220625e-05	1.36236474526165	180.072691342199	227	3409	animal organ development	0.0665884423584629
GO:0032504	0.0422363626628338	1.29328843581346	46.1142445120974	58	873	multicellular organism reproduction	0.0664375715922108
GO:0023052	2.39470135707609e-09	1.48154956016309	341.023553917641	428	6456	signaling	0.0662949194547708
GO:0007154	2.33366014511048e-09	1.48126211107455	343.823158681835	431	6509	cell communication	0.0662160086034721
GO:0032501	2.56407082368707e-11	1.54154984315576	399.97372215991	500	7572	multicellular organismal process	0.0660327522451136
GO:0007275	8.52381118902688e-07	1.40292326899068	271.772953052395	339	5145	multicellular organism development	0.0658892128279883
GO:0009893	7.41627380996703e-05	1.34857060459207	194.229183357368	242	3677	positive regulation of metabolic process	0.0658145227087299
GO:0048731	3.29379886402124e-06	1.38474048041377	253.020883405437	315	4790	system development	0.0657620041753653
GO:0032502	3.62997202487456e-08	1.43807211891675	335.318698926454	415	6348	developmental process	0.0653749212350347
GO:0048856	3.84436436923636e-07	1.40617303072545	302.568605458527	374	5728	anatomical structure development	0.0652932960893855
GO:0043412	0.000155114353029269	1.3261362328387	200.145329274155	246	3789	macromolecule modification	0.0649247822644497
GO:0010604	0.000424809781006889	1.3132486455578	178.329541206003	219	3376	positive regulation of macromolecule metabolic process	0.0648696682464455
GO:0003008	0.00442480828600366	1.28508953582101	120.647118517332	148	2284	system process	0.0647985989492119
GO:0006629	0.0302054627153106	1.25917439951121	70.4127009560434	86	1333	lipid metabolic process	0.0645161290322581
GO:0048699	0.026130949676952	1.25221050599542	79.9736153394221	97	1514	generation of neurons	0.0640686922060766
GO:0031325	0.00142214881953356	1.28490926112631	167.500881269027	203	3171	positive regulation of cellular metabolic process	0.0640176600441501
GO:0030182	0.0367159398608096	1.24405361822213	71.9973828980398	87	1363	neuron differentiation	0.0638297872340425
GO:0048523	5.09683034414464e-05	1.32353859496964	260.204774875821	314	4926	negative regulation of cellular process	0.0637434023548518
GO:0044267	8.77730167793963e-05	1.31457529840892	251.59466965764	303	4763	cellular protein metabolic process	0.063615368465253
GO:0051173	0.00590519659522671	1.24438404491959	156.830689526251	186	2969	positive regulation of nitrogen compound metabolic process	0.0626473560121253
GO:0019538	0.000158128480498204	1.29039213510979	282.971372109171	334	5357	protein metabolic process	0.062348329288781
GO:0007267	0.0458016645548755	1.21009337825335	86.6821022272072	102	1641	cell-cell signaling	0.0621572212065814
GO:1901564	4.29717803208949e-05	1.30691789464267	332.096512311061	390	6287	organonitrogen compound metabolic process	0.0620327660251312
GO:0051172	0.0311831964448661	1.19536186492338	127.144314479517	147	2407	negative regulation of nitrogen compound metabolic process	0.0610718737017034
GO:0031324	0.0273183547456445	1.19584085882053	135.965710623298	157	2574	negative regulation of cellular metabolic process	0.060994560994561
GO:0048519	0.000588182585695604	1.25439505721196	303.202478235326	350	5740	negative regulation of biological process	0.0609756097560976
GO:0065007	7.79050878859567e-05	1.3186980932831	672.274902526305	726	12727	biological regulation	0.0570440795159896
GO:0050794	0.00118594716864171	1.23088786644899	590.135555199487	636	11172	regulation of cellular process	0.0569280343716434
GO:0050789	0.0051996932359745	1.19732747752926	634.136890455589	672	12005	regulation of biological process	0.0559766763848396
GO:0009987	6.09069587180153e-06	1.91609928768081	913.410671366768	947	17292	cellular process	0.054765209345362
