# Supplementary material for: Buffy Coat Transcriptomic Analysis Reveals Alterations in Host Cell Protein Synthesis and Cell Cycle in Severe COVID-19 Patients
Source: Int J Mol Sci. 2022 Nov 5;23(21):13588. doi: 10.3390/ijms232113588 (PMC9659271; doi:10.3390/ijms232113588)
Supplement: Supplementary file 1 [file ijms-23-13588-s001.zip › Table S7.ods]

## Sheet: Table S7
Table S7. Gene ontology biological processes enrichment analysis of the genes from interactive network of the FBL connected to all downregulated DEGs.
GOBPID	Pvalue	OddsRatio	ExpCount	Count	Size	Term	Gene ratio
GO:0019043	0.00217171609716004	Inf	0.0932542861720878	2	2	establishment of viral latency	1
GO:0036048	0.00217171609716004	Inf	0.0932542861720878	2	2	protein desuccinylation	1
GO:0036049	0.00217171609716004	Inf	0.0932542861720878	2	2	peptidyl-lysine desuccinylation	1
GO:0051548	0.00217171609716004	Inf	0.0932542861720878	2	2	negative regulation of keratinocyte migration	1
GO:0060279	0.00217171609716004	Inf	0.0932542861720878	2	2	positive regulation of ovulation	1
GO:0061698	0.00217171609716004	Inf	0.0932542861720878	2	2	protein deglutarylation	1
GO:0061699	0.00217171609716004	Inf	0.0932542861720878	2	2	peptidyl-lysine deglutarylation	1
GO:0000707	0.0466271430860448	Inf	0.0466271430860439	1	1	meiotic DNA recombinase assembly	1
GO:0000921	0.0466271430860448	Inf	0.0466271430860439	1	1	septin ring assembly	1
GO:0001100	0.0466271430860448	Inf	0.0466271430860439	1	1	negative regulation of exit from mitosis	1
GO:0001680	0.0466271430860448	Inf	0.0466271430860439	1	1	tRNA 3'-terminal CCA addition	1
GO:0001998	0.0466271430860448	Inf	0.0466271430860439	1	1	angiotensin-mediated vasoconstriction involved in regulation of systemic arterial blood pressure	1
GO:0002174	0.0466271430860448	Inf	0.0466271430860439	1	1	mammary stem cell proliferation	1
GO:0002849	0.0466271430860448	Inf	0.0466271430860439	1	1	regulation of peripheral T cell tolerance induction	1
GO:0002851	0.0466271430860448	Inf	0.0466271430860439	1	1	positive regulation of peripheral T cell tolerance induction	1
GO:0002875	0.0466271430860448	Inf	0.0466271430860439	1	1	negative regulation of chronic inflammatory response to antigenic stimulus	1
GO:0003116	0.0466271430860448	Inf	0.0466271430860439	1	1	regulation of vasoconstriction by norepinephrine	1
GO:0003117	0.0466271430860448	Inf	0.0466271430860439	1	1	regulation of vasoconstriction by circulating norepinephrine	1
GO:0003363	0.0466271430860448	Inf	0.0466271430860439	1	1	lamellipodium assembly involved in ameboidal cell migration	1
GO:0006185	0.0466271430860448	Inf	0.0466271430860439	1	1	dGDP biosynthetic process	1
GO:0006507	0.0466271430860448	Inf	0.0466271430860439	1	1	GPI anchor release	1
GO:0006797	0.0466271430860448	Inf	0.0466271430860439	1	1	polyphosphate metabolic process	1
GO:0007066	0.0466271430860448	Inf	0.0466271430860439	1	1	female meiosis sister chromatid cohesion	1
GO:0007072	0.0466271430860448	Inf	0.0466271430860439	1	1	positive regulation of transcription involved in exit from mitosis	1
GO:0009237	0.0466271430860448	Inf	0.0466271430860439	1	1	siderophore metabolic process	1
GO:0009682	0.0466271430860448	Inf	0.0466271430860439	1	1	induced systemic resistance	1
GO:0010477	0.0466271430860448	Inf	0.0466271430860439	1	1	response to sulfur dioxide	1
GO:0010585	0.0466271430860448	Inf	0.0466271430860439	1	1	glutamine secretion	1
GO:0010768	0.0466271430860448	Inf	0.0466271430860439	1	1	negative regulation of transcription from RNA polymerase II promoter in response to UV-induced DNA damage	1
GO:0010849	0.0466271430860448	Inf	0.0466271430860439	1	1	regulation of proton-transporting ATPase activity, rotational mechanism	1
GO:0010938	0.0466271430860448	Inf	0.0466271430860439	1	1	cytoplasmic microtubule depolymerization	1
GO:0015680	0.0466271430860448	Inf	0.0466271430860439	1	1	protein maturation by copper ion transfer	1
GO:0015962	0.0466271430860448	Inf	0.0466271430860439	1	1	diadenosine triphosphate metabolic process	1
GO:0015964	0.0466271430860448	Inf	0.0466271430860439	1	1	diadenosine triphosphate catabolic process	1
GO:0018106	0.0466271430860448	Inf	0.0466271430860439	1	1	peptidyl-histidine phosphorylation	1
GO:0019050	0.0466271430860448	Inf	0.0466271430860439	1	1	suppression by virus of host apoptotic process	1
GO:0019290	0.0466271430860448	Inf	0.0466271430860439	1	1	siderophore biosynthetic process	1
GO:0021592	0.0466271430860448	Inf	0.0466271430860439	1	1	fourth ventricle development	1
GO:0021685	0.0466271430860448	Inf	0.0466271430860439	1	1	cerebellar granular layer structural organization	1
GO:0021944	0.0466271430860448	Inf	0.0466271430860439	1	1	neuronal-glial interaction involved in hindbrain glial-mediated radial cell migration	1
GO:0021956	0.0466271430860448	Inf	0.0466271430860439	1	1	central nervous system interneuron axonogenesis	1
GO:0021993	0.0466271430860448	Inf	0.0466271430860439	1	1	initiation of neural tube closure	1
GO:0021998	0.0466271430860448	Inf	0.0466271430860439	1	1	neural plate mediolateral regionalization	1
GO:0030034	0.0466271430860448	Inf	0.0466271430860439	1	1	microvillar actin bundle assembly	1
GO:0030392	0.0466271430860448	Inf	0.0466271430860439	1	1	fructosamine catabolic process	1
GO:0030393	0.0466271430860448	Inf	0.0466271430860439	1	1	fructoselysine metabolic process	1
GO:0032078	0.0466271430860448	Inf	0.0466271430860439	1	1	negative regulation of endodeoxyribonuclease activity	1
GO:0032207	0.0466271430860448	Inf	0.0466271430860439	1	1	regulation of telomere maintenance via recombination	1
GO:0032208	0.0466271430860448	Inf	0.0466271430860439	1	1	negative regulation of telomere maintenance via recombination	1
GO:0032445	0.0466271430860448	Inf	0.0466271430860439	1	1	fructose import	1
GO:0032475	0.0466271430860448	Inf	0.0466271430860439	1	1	otolith formation	1
GO:0033026	0.0466271430860448	Inf	0.0466271430860439	1	1	negative regulation of mast cell apoptotic process	1
GO:0033388	0.0466271430860448	Inf	0.0466271430860439	1	1	putrescine biosynthetic process from arginine	1
GO:0033389	0.0466271430860448	Inf	0.0466271430860439	1	1	putrescine biosynthetic process from arginine, using agmatinase	1
GO:0034014	0.0466271430860448	Inf	0.0466271430860439	1	1	response to triglyceride	1
GO:0034117	0.0466271430860448	Inf	0.0466271430860439	1	1	erythrocyte aggregation	1
GO:0034118	0.0466271430860448	Inf	0.0466271430860439	1	1	regulation of erythrocyte aggregation	1
GO:0034120	0.0466271430860448	Inf	0.0466271430860439	1	1	positive regulation of erythrocyte aggregation	1
GO:0035393	0.0466271430860448	Inf	0.0466271430860439	1	1	chemokine (C-X-C motif) ligand 9 production	1
GO:0035394	0.0466271430860448	Inf	0.0466271430860439	1	1	regulation of chemokine (C-X-C motif) ligand 9 production	1
GO:0035395	0.0466271430860448	Inf	0.0466271430860439	1	1	negative regulation of chemokine (C-X-C motif) ligand 9 production	1
GO:0035543	0.0466271430860448	Inf	0.0466271430860439	1	1	positive regulation of SNARE complex assembly	1
GO:0036034	0.0466271430860448	Inf	0.0466271430860439	1	1	mediator complex assembly	1
GO:0036046	0.0466271430860448	Inf	0.0466271430860439	1	1	protein demalonylation	1
GO:0036047	0.0466271430860448	Inf	0.0466271430860439	1	1	peptidyl-lysine demalonylation	1
GO:0036145	0.0466271430860448	Inf	0.0466271430860439	1	1	dendritic cell homeostasis	1
GO:0036290	0.0466271430860448	Inf	0.0466271430860439	1	1	protein trans-autophosphorylation	1
GO:0036292	0.0466271430860448	Inf	0.0466271430860439	1	1	DNA rewinding	1
GO:0036333	0.0466271430860448	Inf	0.0466271430860439	1	1	hepatocyte homeostasis	1
GO:0038002	0.0466271430860448	Inf	0.0466271430860439	1	1	endocrine signaling	1
GO:0038161	0.0466271430860448	Inf	0.0466271430860439	1	1	prolactin signaling pathway	1
GO:0038193	0.0466271430860448	Inf	0.0466271430860439	1	1	thromboxane A2 signaling pathway	1
GO:0039521	0.0466271430860448	Inf	0.0466271430860439	1	1	suppression by virus of host autophagy	1
GO:0039526	0.0466271430860448	Inf	0.0466271430860439	1	1	modulation by virus of host apoptotic process	1
GO:0043496	0.0466271430860448	Inf	0.0466271430860439	1	1	regulation of protein homodimerization activity	1
GO:0044111	0.0466271430860448	Inf	0.0466271430860439	1	1	formation of structure involved in a symbiotic process	1
GO:0045186	0.0466271430860448	Inf	0.0466271430860439	1	1	zonula adherens assembly	1
GO:0045660	0.0466271430860448	Inf	0.0466271430860439	1	1	positive regulation of neutrophil differentiation	1
GO:0046359	0.0466271430860448	Inf	0.0466271430860439	1	1	butyrate catabolic process	1
GO:0046511	0.0466271430860448	Inf	0.0466271430860439	1	1	sphinganine biosynthetic process	1
GO:0046680	0.0466271430860448	Inf	0.0466271430860439	1	1	response to DDT	1
GO:0046711	0.0466271430860448	Inf	0.0466271430860439	1	1	GDP biosynthetic process	1
GO:0046814	0.0466271430860448	Inf	0.0466271430860439	1	1	coreceptor-mediated virion attachment to host cell	1
GO:0048338	0.0466271430860448	Inf	0.0466271430860439	1	1	mesoderm structural organization	1
GO:0048352	0.0466271430860448	Inf	0.0466271430860439	1	1	paraxial mesoderm structural organization	1
GO:0048372	0.0466271430860448	Inf	0.0466271430860439	1	1	lateral mesodermal cell fate commitment	1
GO:0048377	0.0466271430860448	Inf	0.0466271430860439	1	1	lateral mesodermal cell fate specification	1
GO:0048378	0.0466271430860448	Inf	0.0466271430860439	1	1	regulation of lateral mesodermal cell fate specification	1
GO:0050652	0.0466271430860448	Inf	0.0466271430860439	1	1	dermatan sulfate proteoglycan biosynthetic process, polysaccharide chain biosynthetic process	1
GO:0051086	0.0466271430860448	Inf	0.0466271430860439	1	1	chaperone mediated protein folding independent of cofactor	1
GO:0051102	0.0466271430860448	Inf	0.0466271430860439	1	1	DNA ligation involved in DNA recombination	1
GO:0051141	0.0466271430860448	Inf	0.0466271430860439	1	1	negative regulation of NK T cell proliferation	1
GO:0051585	0.0466271430860448	Inf	0.0466271430860439	1	1	negative regulation of dopamine uptake involved in synaptic transmission	1
GO:0051622	0.0466271430860448	Inf	0.0466271430860439	1	1	negative regulation of norepinephrine uptake	1
GO:0051664	0.0466271430860448	Inf	0.0466271430860439	1	1	nuclear pore localization	1
GO:0051945	0.0466271430860448	Inf	0.0466271430860439	1	1	negative regulation of catecholamine uptake involved in synaptic transmission	1
GO:0060301	0.0466271430860448	Inf	0.0466271430860439	1	1	positive regulation of cytokine activity	1
GO:0060404	0.0466271430860448	Inf	0.0466271430860439	1	1	axonemal microtubule depolymerization	1
GO:0060735	0.0466271430860448	Inf	0.0466271430860439	1	1	regulation of eIF2 alpha phosphorylation by dsRNA	1
GO:0060904	0.0466271430860448	Inf	0.0466271430860439	1	1	regulation of protein folding in endoplasmic reticulum	1
GO:0061185	0.0466271430860448	Inf	0.0466271430860439	1	1	negative regulation of dermatome development	1
GO:0061444	0.0466271430860448	Inf	0.0466271430860439	1	1	endocardial cushion cell development	1
GO:0061481	0.0466271430860448	Inf	0.0466271430860439	1	1	response to TNF agonist	1
GO:0061523	0.0466271430860448	Inf	0.0466271430860439	1	1	cilium disassembly	1
GO:0061956	0.0466271430860448	Inf	0.0466271430860439	1	1	penetration of cumulus oophorus	1
GO:0070054	0.0466271430860448	Inf	0.0466271430860439	1	1	mRNA splicing, via endonucleolytic cleavage and ligation	1
GO:0070462	0.0466271430860448	Inf	0.0466271430860439	1	1	plus-end specific microtubule depolymerization	1
GO:0070510	0.0466271430860448	Inf	0.0466271430860439	1	1	regulation of histone H4-K20 methylation	1
GO:0070512	0.0466271430860448	Inf	0.0466271430860439	1	1	positive regulation of histone H4-K20 methylation	1
GO:0071401	0.0466271430860448	Inf	0.0466271430860439	1	1	cellular response to triglyceride	1
GO:0071529	0.0466271430860448	Inf	0.0466271430860439	1	1	cementum mineralization	1
GO:0075713	0.0466271430860448	Inf	0.0466271430860439	1	1	establishment of integrated proviral latency	1
GO:0090074	0.0466271430860448	Inf	0.0466271430860439	1	1	negative regulation of protein homodimerization activity	1
GO:0090242	0.0466271430860448	Inf	0.0466271430860439	1	1	retinoic acid receptor signaling pathway involved in somitogenesis	1
GO:0097712	0.0466271430860448	Inf	0.0466271430860439	1	1	vesicle targeting, trans-Golgi to periciliary membrane compartment	1
GO:0097744	0.0466271430860448	Inf	0.0466271430860439	1	1	urate salt excretion	1
GO:0099087	0.0466271430860448	Inf	0.0466271430860439	1	1	anterograde axonal transport of messenger ribonucleoprotein complex	1
GO:0099088	0.0466271430860448	Inf	0.0466271430860439	1	1	axonal transport of messenger ribonucleoprotein complex	1
GO:0099627	0.0466271430860448	Inf	0.0466271430860439	1	1	neurotransmitter receptor cycle	1
GO:0099630	0.0466271430860448	Inf	0.0466271430860439	1	1	postsynaptic neurotransmitter receptor cycle	1
GO:0106047	0.0466271430860448	Inf	0.0466271430860439	1	1	polyamine deacetylation	1
GO:0106048	0.0466271430860448	Inf	0.0466271430860439	1	1	spermidine deacetylation	1
GO:0106064	0.0466271430860448	Inf	0.0466271430860439	1	1	regulation of cobalamin metabolic process	1
GO:0106121	0.0466271430860448	Inf	0.0466271430860439	1	1	positive regulation of cobalamin metabolic process	1
GO:0110008	0.0466271430860448	Inf	0.0466271430860439	1	1	ncRNA deadenylation	1
GO:0140321	0.0466271430860448	Inf	0.0466271430860439	1	1	negative regulation by symbiont of host autophagy	1
GO:0140493	0.0466271430860448	Inf	0.0466271430860439	1	1	very long-chain fatty acid beta-oxidation	1
GO:0150013	0.0466271430860448	Inf	0.0466271430860439	1	1	negative regulation of neuron projection arborization	1
GO:1900022	0.0466271430860448	Inf	0.0466271430860439	1	1	regulation of D-erythro-sphingosine kinase activity	1
GO:1901340	0.0466271430860448	Inf	0.0466271430860439	1	1	negative regulation of store-operated calcium channel activity	1
GO:1901557	0.0466271430860448	Inf	0.0466271430860439	1	1	response to fenofibrate	1
GO:1902296	0.0466271430860448	Inf	0.0466271430860439	1	1	DNA strand elongation involved in cell cycle DNA replication	1
GO:1902319	0.0466271430860448	Inf	0.0466271430860439	1	1	DNA strand elongation involved in nuclear cell cycle DNA replication	1
GO:1902378	0.0466271430860448	Inf	0.0466271430860439	1	1	VEGF-activated neuropilin signaling pathway involved in axon guidance	1
GO:1902380	0.0466271430860448	Inf	0.0466271430860439	1	1	positive regulation of endoribonuclease activity	1
GO:1902483	0.0466271430860448	Inf	0.0466271430860439	1	1	cytotoxic T cell pyroptotic process	1
GO:1902546	0.0466271430860448	Inf	0.0466271430860439	1	1	positive regulation of DNA N-glycosylase activity	1
GO:1902576	0.0466271430860448	Inf	0.0466271430860439	1	1	negative regulation of nuclear cell cycle DNA replication	1
GO:1902629	0.0466271430860448	Inf	0.0466271430860439	1	1	regulation of mRNA stability involved in cellular response to UV	1
GO:1902983	0.0466271430860448	Inf	0.0466271430860439	1	1	DNA strand elongation involved in mitotic DNA replication	1
GO:1903125	0.0466271430860448	Inf	0.0466271430860439	1	1	negative regulation of thioredoxin peroxidase activity by peptidyl-threonine phosphorylation	1
GO:1903282	0.0466271430860448	Inf	0.0466271430860439	1	1	regulation of glutathione peroxidase activity	1
GO:1903284	0.0466271430860448	Inf	0.0466271430860439	1	1	positive regulation of glutathione peroxidase activity	1
GO:1903464	0.0466271430860448	Inf	0.0466271430860439	1	1	negative regulation of mitotic cell cycle DNA replication	1
GO:1903517	0.0466271430860448	Inf	0.0466271430860439	1	1	negative regulation of single strand break repair	1
GO:1903621	0.0466271430860448	Inf	0.0466271430860439	1	1	protein localization to photoreceptor connecting cilium	1
GO:1903673	0.0466271430860448	Inf	0.0466271430860439	1	1	mitotic cleavage furrow formation	1
GO:1903697	0.0466271430860448	Inf	0.0466271430860439	1	1	negative regulation of microvillus assembly	1
GO:1903713	0.0466271430860448	Inf	0.0466271430860439	1	1	asparagine transmembrane transport	1
GO:1903770	0.0466271430860448	Inf	0.0466271430860439	1	1	negative regulation of beta-galactosidase activity	1
GO:1903803	0.0466271430860448	Inf	0.0466271430860439	1	1	L-glutamine import across plasma membrane	1
GO:1903823	0.0466271430860448	Inf	0.0466271430860439	1	1	telomere single strand break repair	1
GO:1903824	0.0466271430860448	Inf	0.0466271430860439	1	1	negative regulation of telomere single strand break repair	1
GO:1904014	0.0466271430860448	Inf	0.0466271430860439	1	1	response to serotonin	1
GO:1904015	0.0466271430860448	Inf	0.0466271430860439	1	1	cellular response to serotonin	1
GO:1904050	0.0466271430860448	Inf	0.0466271430860439	1	1	positive regulation of spontaneous neurotransmitter secretion	1
GO:1904221	0.0466271430860448	Inf	0.0466271430860439	1	1	negative regulation of serine C-palmitoyltransferase activity	1
GO:1904266	0.0466271430860448	Inf	0.0466271430860439	1	1	regulation of Schwann cell chemotaxis	1
GO:1904268	0.0466271430860448	Inf	0.0466271430860439	1	1	positive regulation of Schwann cell chemotaxis	1
GO:1904307	0.0466271430860448	Inf	0.0466271430860439	1	1	response to desipramine	1
GO:1904412	0.0466271430860448	Inf	0.0466271430860439	1	1	regulation of cardiac ventricle development	1
GO:1904414	0.0466271430860448	Inf	0.0466271430860439	1	1	positive regulation of cardiac ventricle development	1
GO:1904441	0.0466271430860448	Inf	0.0466271430860439	1	1	regulation of thyroid gland epithelial cell proliferation	1
GO:1904442	0.0466271430860448	Inf	0.0466271430860439	1	1	negative regulation of thyroid gland epithelial cell proliferation	1
GO:1904538	0.0466271430860448	Inf	0.0466271430860439	1	1	regulation of glycolytic process through fructose-6-phosphate	1
GO:1904539	0.0466271430860448	Inf	0.0466271430860439	1	1	negative regulation of glycolytic process through fructose-6-phosphate	1
GO:1904542	0.0466271430860448	Inf	0.0466271430860439	1	1	regulation of free ubiquitin chain polymerization	1
GO:1904544	0.0466271430860448	Inf	0.0466271430860439	1	1	positive regulation of free ubiquitin chain polymerization	1
GO:1904677	0.0466271430860448	Inf	0.0466271430860439	1	1	positive regulation of somatic stem cell division	1
GO:1904887	0.0466271430860448	Inf	0.0466271430860439	1	1	Wnt signalosome assembly	1
GO:1905025	0.0466271430860448	Inf	0.0466271430860439	1	1	negative regulation of membrane repolarization during ventricular cardiac muscle cell action potential	1
GO:1905040	0.0466271430860448	Inf	0.0466271430860439	1	1	otic placode development	1
GO:1905062	0.0466271430860448	Inf	0.0466271430860439	1	1	positive regulation of cardioblast proliferation	1
GO:1905115	0.0466271430860448	Inf	0.0466271430860439	1	1	regulation of lateral attachment of mitotic spindle microtubules to kinetochore	1
GO:1905116	0.0466271430860448	Inf	0.0466271430860439	1	1	positive regulation of lateral attachment of mitotic spindle microtubules to kinetochore	1
GO:1905285	0.0466271430860448	Inf	0.0466271430860439	1	1	fibrous ring of heart morphogenesis	1
GO:1905302	0.0466271430860448	Inf	0.0466271430860439	1	1	negative regulation of macropinocytosis	1
GO:1905609	0.0466271430860448	Inf	0.0466271430860439	1	1	positive regulation of smooth muscle cell-matrix adhesion	1
GO:1905856	0.0466271430860448	Inf	0.0466271430860439	1	1	negative regulation of pentose-phosphate shunt	1
GO:1990248	0.0466271430860448	Inf	0.0466271430860439	1	1	regulation of transcription from RNA polymerase II promoter in response to DNA damage	1
GO:1990539	0.0466271430860448	Inf	0.0466271430860439	1	1	fructose import across plasma membrane	1
GO:1990579	0.0466271430860448	Inf	0.0466271430860439	1	1	peptidyl-serine trans-autophosphorylation	1
GO:1990729	0.0466271430860448	Inf	0.0466271430860439	1	1	primary miRNA modification	1
GO:1990744	0.0466271430860448	Inf	0.0466271430860439	1	1	primary miRNA methylation	1
GO:1990751	0.0466271430860448	Inf	0.0466271430860439	1	1	Schwann cell chemotaxis	1
GO:1990771	0.0466271430860448	Inf	0.0466271430860439	1	1	clathrin-dependent extracellular exosome endocytosis	1
GO:1990789	0.0466271430860448	Inf	0.0466271430860439	1	1	thyroid gland epithelial cell proliferation	1
GO:1990859	0.0466271430860448	Inf	0.0466271430860439	1	1	cellular response to endothelin	1
GO:2000101	0.0466271430860448	Inf	0.0466271430860439	1	1	regulation of mammary stem cell proliferation	1
GO:2000103	0.0466271430860448	Inf	0.0466271430860439	1	1	positive regulation of mammary stem cell proliferation	1
GO:2000431	0.0466271430860448	Inf	0.0466271430860439	1	1	regulation of cytokinesis, actomyosin contractile ring assembly	1
GO:2000469	0.0466271430860448	Inf	0.0466271430860439	1	1	negative regulation of peroxidase activity	1
GO:2000616	0.0466271430860448	Inf	0.0466271430860439	1	1	negative regulation of histone H3-K9 acetylation	1
GO:2000661	0.0466271430860448	Inf	0.0466271430860439	1	1	positive regulation of interleukin-1-mediated signaling pathway	1
GO:2000775	0.0466271430860448	Inf	0.0466271430860439	1	1	histone H3-S10 phosphorylation involved in chromosome condensation	1
GO:2000808	0.0466271430860448	Inf	0.0466271430860439	1	1	negative regulation of synaptic vesicle clustering	1
GO:2001176	0.0466271430860448	Inf	0.0466271430860439	1	1	regulation of mediator complex assembly	1
GO:2001178	0.0466271430860448	Inf	0.0466271430860439	1	1	positive regulation of mediator complex assembly	1
GO:0021678	0.000390071636608979	61.548275862069	0.186508572344176	3	4	third ventricle development	0.75
GO:0030185	0.00631306883839252	40.9850746268657	0.139881429258132	2	3	nitric oxide transport	0.666666666666667
GO:0030389	0.00631306883839252	40.9850746268657	0.139881429258132	2	3	fructosamine metabolic process	0.666666666666667
GO:0042904	0.00631306883839252	40.9850746268657	0.139881429258132	2	3	9-cis-retinoic acid biosynthetic process	0.666666666666667
GO:0042905	0.00631306883839252	40.9850746268657	0.139881429258132	2	3	9-cis-retinoic acid metabolic process	0.666666666666667
GO:0046882	0.00631306883839252	40.9850746268657	0.139881429258132	2	3	negative regulation of follicle-stimulating hormone secretion	0.666666666666667
GO:0048294	0.00631306883839252	40.9850746268657	0.139881429258132	2	3	negative regulation of isotype switching to IgE isotypes	0.666666666666667
GO:0060024	0.00631306883839252	40.9850746268657	0.139881429258132	2	3	rhythmic synaptic transmission	0.666666666666667
GO:0060278	0.00631306883839252	40.9850746268657	0.139881429258132	2	3	regulation of ovulation	0.666666666666667
GO:0060671	0.00631306883839252	40.9850746268657	0.139881429258132	2	3	epithelial cell differentiation involved in embryonic placenta development	0.666666666666667
GO:0060672	0.00631306883839252	40.9850746268657	0.139881429258132	2	3	epithelial cell morphogenesis involved in placental branching	0.666666666666667
GO:1902499	0.00631306883839252	40.9850746268657	0.139881429258132	2	3	positive regulation of protein autoubiquitination	0.666666666666667
GO:1903765	0.00631306883839252	40.9850746268657	0.139881429258132	2	3	negative regulation of potassium ion export across plasma membrane	0.666666666666667
GO:2000468	0.00631306883839252	40.9850746268657	0.139881429258132	2	3	regulation of peroxidase activity	0.666666666666667
GO:0051256	0.000282628830158852	20.536248561565	0.373017144688351	4	8	mitotic spindle midzone assembly	0.5
GO:1904491	0.000282628830158852	20.536248561565	0.373017144688351	4	8	protein localization to ciliary transition zone	0.5
GO:0009136	0.00181723214938591	20.5137931034483	0.279762858516263	3	6	purine nucleoside diphosphate biosynthetic process	0.5
GO:0009180	0.00181723214938591	20.5137931034483	0.279762858516263	3	6	purine ribonucleoside diphosphate biosynthetic process	0.5
GO:1901401	0.00181723214938591	20.5137931034483	0.279762858516263	3	6	regulation of tetrapyrrole metabolic process	0.5
GO:0001766	0.0122360660401761	20.4913892078071	0.186508572344176	2	4	membrane raft polarization	0.5
GO:0001920	0.0122360660401761	20.4913892078071	0.186508572344176	2	4	negative regulation of receptor recycling	0.5
GO:0002677	0.0122360660401761	20.4913892078071	0.186508572344176	2	4	negative regulation of chronic inflammatory response	0.5
GO:0006273	0.0122360660401761	20.4913892078071	0.186508572344176	2	4	lagging strand elongation	0.5
GO:0019042	0.0122360660401761	20.4913892078071	0.186508572344176	2	4	viral latency	0.5
GO:0031133	0.0122360660401761	20.4913892078071	0.186508572344176	2	4	regulation of axon diameter	0.5
GO:0032185	0.0122360660401761	20.4913892078071	0.186508572344176	2	4	septin cytoskeleton organization	0.5
GO:0032487	0.0122360660401761	20.4913892078071	0.186508572344176	2	4	regulation of Rap protein signal transduction	0.5
GO:0034699	0.0122360660401761	20.4913892078071	0.186508572344176	2	4	response to luteinizing hormone	0.5
GO:0052040	0.0122360660401761	20.4913892078071	0.186508572344176	2	4	modulation by symbiont of host programmed cell death	0.5
GO:0060300	0.0122360660401761	20.4913892078071	0.186508572344176	2	4	regulation of cytokine activity	0.5
GO:0060574	0.0122360660401761	20.4913892078071	0.186508572344176	2	4	intestinal epithelial cell maturation	0.5
GO:0060699	0.0122360660401761	20.4913892078071	0.186508572344176	2	4	regulation of endoribonuclease activity	0.5
GO:0061073	0.0122360660401761	20.4913892078071	0.186508572344176	2	4	ciliary body morphogenesis	0.5
GO:0090669	0.0122360660401761	20.4913892078071	0.186508572344176	2	4	telomerase RNA stabilization	0.5
GO:1901403	0.0122360660401761	20.4913892078071	0.186508572344176	2	4	positive regulation of tetrapyrrole metabolic process	0.5
GO:1990258	0.0122360660401761	20.4913892078071	0.186508572344176	2	4	histone glutamine methylation	0.5
GO:0000022	0.000489957891463568	16.4280782508631	0.419644287774395	4	9	mitotic spindle elongation	0.444444444444444
GO:0051231	0.000489957891463568	16.4280782508631	0.419644287774395	4	9	spindle elongation	0.444444444444444
GO:1990314	0.000489957891463568	16.4280782508631	0.419644287774395	4	9	cellular response to insulin-like growth factor stimulus	0.444444444444444
GO:0002676	0.00307010252435263	15.3844827586207	0.326390001602307	3	7	regulation of chronic inflammatory response	0.428571428571429
GO:0009188	0.00307010252435263	15.3844827586207	0.326390001602307	3	7	ribonucleoside diphosphate biosynthetic process	0.428571428571429
GO:0033540	0.000131150079993901	14.6831797235023	0.559525717032527	5	12	fatty acid beta-oxidation using acyl-CoA oxidase	0.416666666666667
GO:0070207	3.51794879140787e-05	13.7185697808535	0.699407146290659	6	15	protein homotrimerization	0.4
GO:0002309	0.0197659308162455	13.6601607347876	0.23313571543022	2	5	T cell proliferation involved in immune response	0.4
GO:0006172	0.0197659308162455	13.6601607347876	0.23313571543022	2	5	ADP biosynthetic process	0.4
GO:0010286	0.0197659308162455	13.6601607347876	0.23313571543022	2	5	heat acclimation	0.4
GO:0019054	0.0197659308162455	13.6601607347876	0.23313571543022	2	5	modulation by virus of host cellular process	0.4
GO:0030885	0.0197659308162455	13.6601607347876	0.23313571543022	2	5	regulation of myeloid dendritic cell activation	0.4
GO:0032829	0.0197659308162455	13.6601607347876	0.23313571543022	2	5	regulation of CD4-positive, CD25-positive, alpha-beta regulatory T cell differentiation	0.4
GO:0032831	0.0197659308162455	13.6601607347876	0.23313571543022	2	5	positive regulation of CD4-positive, CD25-positive, alpha-beta regulatory T cell differentiation	0.4
GO:0036149	0.0197659308162455	13.6601607347876	0.23313571543022	2	5	phosphatidylinositol acyl-chain remodeling	0.4
GO:0036476	0.0197659308162455	13.6601607347876	0.23313571543022	2	5	neuron death in response to hydrogen peroxide	0.4
GO:0042661	0.0197659308162455	13.6601607347876	0.23313571543022	2	5	regulation of mesodermal cell fate specification	0.4
GO:0045829	0.0197659308162455	13.6601607347876	0.23313571543022	2	5	negative regulation of isotype switching	0.4
GO:0046880	0.0197659308162455	13.6601607347876	0.23313571543022	2	5	regulation of follicle-stimulating hormone secretion	0.4
GO:0046881	0.0197659308162455	13.6601607347876	0.23313571543022	2	5	positive regulation of follicle-stimulating hormone secretion	0.4
GO:0051036	0.0197659308162455	13.6601607347876	0.23313571543022	2	5	regulation of endosome size	0.4
GO:0060318	0.0197659308162455	13.6601607347876	0.23313571543022	2	5	definitive erythrocyte differentiation	0.4
GO:0060385	0.0197659308162455	13.6601607347876	0.23313571543022	2	5	axonogenesis involved in innervation	0.4
GO:0060605	0.0197659308162455	13.6601607347876	0.23313571543022	2	5	tube lumen cavitation	0.4
GO:0060662	0.0197659308162455	13.6601607347876	0.23313571543022	2	5	salivary gland cavitation	0.4
GO:0060979	0.0197659308162455	13.6601607347876	0.23313571543022	2	5	vasculogenesis involved in coronary vascular morphogenesis	0.4
GO:0070370	0.0197659308162455	13.6601607347876	0.23313571543022	2	5	cellular heat acclimation	0.4
GO:0070453	0.0197659308162455	13.6601607347876	0.23313571543022	2	5	regulation of heme biosynthetic process	0.4
GO:0071650	0.0197659308162455	13.6601607347876	0.23313571543022	2	5	negative regulation of chemokine (C-C motif) ligand 5 production	0.4
GO:0071680	0.0197659308162455	13.6601607347876	0.23313571543022	2	5	response to indole-3-methanol	0.4
GO:0071681	0.0197659308162455	13.6601607347876	0.23313571543022	2	5	cellular response to indole-3-methanol	0.4
GO:0090296	0.0197659308162455	13.6601607347876	0.23313571543022	2	5	regulation of mitochondrial DNA replication	0.4
GO:0098713	0.0197659308162455	13.6601607347876	0.23313571543022	2	5	leucine import across plasma membrane	0.4
GO:0110104	0.0197659308162455	13.6601607347876	0.23313571543022	2	5	mRNA alternative polyadenylation	0.4
GO:0120197	0.0197659308162455	13.6601607347876	0.23313571543022	2	5	mucociliary clearance	0.4
GO:1901463	0.0197659308162455	13.6601607347876	0.23313571543022	2	5	regulation of tetrapyrrole biosynthetic process	0.4
GO:1902617	0.0197659308162455	13.6601607347876	0.23313571543022	2	5	response to fluoride	0.4
GO:1903207	0.0197659308162455	13.6601607347876	0.23313571543022	2	5	regulation of hydrogen peroxide-induced neuron death	0.4
GO:1903208	0.0197659308162455	13.6601607347876	0.23313571543022	2	5	negative regulation of hydrogen peroxide-induced neuron death	0.4
GO:1903377	0.0197659308162455	13.6601607347876	0.23313571543022	2	5	negative regulation of oxidative stress-induced neuron intrinsic apoptotic signaling pathway	0.4
GO:1903801	0.0197659308162455	13.6601607347876	0.23313571543022	2	5	L-leucine import across plasma membrane	0.4
GO:0060670	0.000204948407892562	12.8470622119816	0.606152860118571	5	13	branching involved in labyrinthine layer morphogenesis	0.384615384615385
GO:0003223	0.00474258674086889	12.3068965517241	0.373017144688351	3	8	ventricular compact myocardium morphogenesis	375
GO:0015949	0.00474258674086889	12.3068965517241	0.373017144688351	3	8	nucleobase-containing small molecule interconversion	375
GO:0032071	0.00474258674086889	12.3068965517241	0.373017144688351	3	8	regulation of endodeoxyribonuclease activity	375
GO:0090324	0.00474258674086889	12.3068965517241	0.373017144688351	3	8	negative regulation of oxidative phosphorylation	375
GO:0090400	0.00474258674086889	12.3068965517241	0.373017144688351	3	8	stress-induced premature senescence	375
GO:0070206	8.02719492743928e-05	11.2230261088393	0.792661432462746	6	17	protein trimerization	0.352941176470588
GO:0015671	0.00044231128372701	10.2764976958525	0.699407146290659	5	15	oxygen transport	0.333333333333333
GO:2000104	0.00044231128372701	10.2764976958525	0.699407146290659	5	15	negative regulation of DNA-dependent DNA replication	0.333333333333333
GO:0021670	0.0017201495199385	10.2658227848101	0.559525717032527	4	12	lateral ventricle development	0.333333333333333
GO:0038203	0.0017201495199385	10.2658227848101	0.559525717032527	4	12	TORC2 signaling	0.333333333333333
GO:0051255	0.0017201495199385	10.2658227848101	0.559525717032527	4	12	spindle midzone assembly	0.333333333333333
GO:0006265	0.00686890116557156	10.2551724137931	0.419644287774395	3	9	DNA topological change	0.333333333333333
GO:0006924	0.00686890116557156	10.2551724137931	0.419644287774395	3	9	activation-induced cell death of T cells	0.333333333333333
GO:0036480	0.00686890116557156	10.2551724137931	0.419644287774395	3	9	neuron intrinsic apoptotic signaling pathway in response to oxidative stress	0.333333333333333
GO:0048478	0.00686890116557156	10.2551724137931	0.419644287774395	3	9	replication fork protection	0.333333333333333
GO:0060700	0.00686890116557156	10.2551724137931	0.419644287774395	3	9	regulation of ribonuclease activity	0.333333333333333
GO:0140627	0.00686890116557156	10.2551724137931	0.419644287774395	3	9	ubiquitin-dependent protein catabolic process via the C-end degron rule pathway	0.333333333333333
GO:1900244	0.00686890116557156	10.2551724137931	0.419644287774395	3	9	positive regulation of synaptic vesicle endocytosis	0.333333333333333
GO:1901856	0.00686890116557156	10.2551724137931	0.419644287774395	3	9	negative regulation of cellular respiration	0.333333333333333
GO:1903376	0.00686890116557156	10.2551724137931	0.419644287774395	3	9	regulation of oxidative stress-induced neuron intrinsic apoptotic signaling pathway	0.333333333333333
GO:0000912	0.0287402801496753	10.2445464982778	0.279762858516263	2	6	assembly of actomyosin apparatus involved in cytokinesis	0.333333333333333
GO:0000915	0.0287402801496753	10.2445464982778	0.279762858516263	2	6	actomyosin contractile ring assembly	0.333333333333333
GO:0007270	0.0287402801496753	10.2445464982778	0.279762858516263	2	6	neuron-neuron synaptic transmission	0.333333333333333
GO:0009052	0.0287402801496753	10.2445464982778	0.279762858516263	2	6	pentose-phosphate shunt, non-oxidative branch	0.333333333333333
GO:0009249	0.0287402801496753	10.2445464982778	0.279762858516263	2	6	protein lipoylation	0.333333333333333
GO:0018364	0.0287402801496753	10.2445464982778	0.279762858516263	2	6	peptidyl-glutamine methylation	0.333333333333333
GO:0021886	0.0287402801496753	10.2445464982778	0.279762858516263	2	6	hypothalamus gonadotrophin-releasing hormone neuron differentiation	0.333333333333333
GO:0021888	0.0287402801496753	10.2445464982778	0.279762858516263	2	6	hypothalamus gonadotrophin-releasing hormone neuron development	0.333333333333333
GO:0032278	0.0287402801496753	10.2445464982778	0.279762858516263	2	6	positive regulation of gonadotropin secretion	0.333333333333333
GO:0033634	0.0287402801496753	10.2445464982778	0.279762858516263	2	6	positive regulation of cell-cell adhesion mediated by integrin	0.333333333333333
GO:0035694	0.0287402801496753	10.2445464982778	0.279762858516263	2	6	mitochondrial protein catabolic process	0.333333333333333
GO:0035723	0.0287402801496753	10.2445464982778	0.279762858516263	2	6	interleukin-15-mediated signaling pathway	0.333333333333333
GO:0035744	0.0287402801496753	10.2445464982778	0.279762858516263	2	6	T-helper 1 cell cytokine production	0.333333333333333
GO:0043504	0.0287402801496753	10.2445464982778	0.279762858516263	2	6	mitochondrial DNA repair	0.333333333333333
GO:0046054	0.0287402801496753	10.2445464982778	0.279762858516263	2	6	dGMP metabolic process	0.333333333333333
GO:0050904	0.0287402801496753	10.2445464982778	0.279762858516263	2	6	diapedesis	0.333333333333333
GO:0051987	0.0287402801496753	10.2445464982778	0.279762858516263	2	6	positive regulation of attachment of spindle microtubules to kinetochore	0.333333333333333
GO:0060028	0.0287402801496753	10.2445464982778	0.279762858516263	2	6	convergent extension involved in axis elongation	0.333333333333333
GO:0061419	0.0287402801496753	10.2445464982778	0.279762858516263	2	6	positive regulation of transcription from RNA polymerase II promoter in response to hypoxia	0.333333333333333
GO:0071350	0.0287402801496753	10.2445464982778	0.279762858516263	2	6	cellular response to interleukin-15	0.333333333333333
GO:0071455	0.0287402801496753	10.2445464982778	0.279762858516263	2	6	cellular response to hyperoxia	0.333333333333333
GO:0090315	0.0287402801496753	10.2445464982778	0.279762858516263	2	6	negative regulation of protein targeting to membrane	0.333333333333333
GO:0090521	0.0287402801496753	10.2445464982778	0.279762858516263	2	6	glomerular visceral epithelial cell migration	0.333333333333333
GO:1901374	0.0287402801496753	10.2445464982778	0.279762858516263	2	6	acetate ester transport	0.333333333333333
GO:1901727	0.0287402801496753	10.2445464982778	0.279762858516263	2	6	positive regulation of histone deacetylase activity	0.333333333333333
GO:1902231	0.0287402801496753	10.2445464982778	0.279762858516263	2	6	positive regulation of intrinsic apoptotic signaling pathway in response to DNA damage	0.333333333333333
GO:1902498	0.0287402801496753	10.2445464982778	0.279762858516263	2	6	regulation of protein autoubiquitination	0.333333333333333
GO:1902803	0.0287402801496753	10.2445464982778	0.279762858516263	2	6	regulation of synaptic vesicle transport	0.333333333333333
GO:1902956	0.0287402801496753	10.2445464982778	0.279762858516263	2	6	regulation of mitochondrial electron transport, NADH to ubiquinone	0.333333333333333
GO:1903147	0.0287402801496753	10.2445464982778	0.279762858516263	2	6	negative regulation of autophagy of mitochondrion	0.333333333333333
GO:1904778	0.0287402801496753	10.2445464982778	0.279762858516263	2	6	positive regulation of protein localization to cell cortex	0.333333333333333
GO:1905274	0.0287402801496753	10.2445464982778	0.279762858516263	2	6	regulation of modification of postsynaptic actin cytoskeleton	0.333333333333333
GO:1990116	0.0287402801496753	10.2445464982778	0.279762858516263	2	6	ribosome-associated ubiquitin-dependent protein catabolic process	0.333333333333333
GO:1990962	0.0287402801496753	10.2445464982778	0.279762858516263	2	6	xenobiotic transport across blood-brain barrier	0.333333333333333
GO:2000143	0.0287402801496753	10.2445464982778	0.279762858516263	2	6	negative regulation of DNA-templated transcription, initiation	0.333333333333333
GO:2000554	0.0287402801496753	10.2445464982778	0.279762858516263	2	6	regulation of T-helper 1 cell cytokine production	0.333333333333333
GO:2000556	0.0287402801496753	10.2445464982778	0.279762858516263	2	6	positive regulation of T-helper 1 cell cytokine production	0.333333333333333
GO:0044320	0.000162415291649186	9.495342028214	0.885915718634834	6	19	cellular response to leptin stimulus	0.315789473684211
GO:0006978	0.000618784917692612	9.3417469627147	0.746034289376702	5	16	DNA damage response, signal transduction by p53 class mediator resulting in transcription of p21 class mediator	0.3125
GO:0034982	0.00239357223640335	9.12466436517069	0.606152860118571	4	13	mitochondrial protein processing	0.307692307692308
GO:0042541	0.00239357223640335	9.12466436517069	0.606152860118571	4	13	hemoglobin biosynthetic process	0.307692307692308
GO:0015669	0.000222912191585495	8.81660899653979	0.932542861720878	6	20	gas transport	0.3
GO:0001553	0.00947564013372032	8.78965517241379	0.466271430860439	3	10	luteinization	0.3
GO:0009133	0.00947564013372032	8.78965517241379	0.466271430860439	3	10	nucleoside diphosphate biosynthetic process	0.3
GO:0032070	0.00947564013372032	8.78965517241379	0.466271430860439	3	10	regulation of deoxyribonuclease activity	0.3
GO:0045792	0.00947564013372032	8.78965517241379	0.466271430860439	3	10	negative regulation of cell size	0.3
GO:0061179	0.00947564013372032	8.78965517241379	0.466271430860439	3	10	negative regulation of insulin secretion involved in cellular response to glucose stimulus	0.3
GO:0070561	0.00947564013372032	8.78965517241379	0.466271430860439	3	10	vitamin D receptor signaling pathway	0.3
GO:0020027	0.000843165321200204	8.56278801843318	0.792661432462746	5	17	hemoglobin metabolic process	0.294117647058824
GO:0042772	0.000843165321200204	8.56278801843318	0.792661432462746	5	17	DNA damage response, signal transduction resulting in transcription	0.294117647058824
GO:0048532	0.000843165321200204	8.56278801843318	0.792661432462746	5	17	anatomical structure arrangement	0.294117647058824
GO:1902969	0.00322836085691561	8.21173762945915	0.652780003204615	4	14	mitotic DNA replication	0.285714285714286
GO:0000055	0.0390083511998044	8.19517795637199	0.326390001602307	2	7	ribosomal large subunit export from nucleus	0.285714285714286
GO:0002069	0.0390083511998044	8.19517795637199	0.326390001602307	2	7	columnar/cuboidal epithelial cell maturation	0.285714285714286
GO:0002317	0.0390083511998044	8.19517795637199	0.326390001602307	2	7	plasma cell differentiation	0.285714285714286
GO:0006501	0.0390083511998044	8.19517795637199	0.326390001602307	2	7	C-terminal protein lipidation	0.285714285714286
GO:0006627	0.0390083511998044	8.19517795637199	0.326390001602307	2	7	protein processing involved in protein targeting to mitochondrion	0.285714285714286
GO:0006686	0.0390083511998044	8.19517795637199	0.326390001602307	2	7	sphingomyelin biosynthetic process	0.285714285714286
GO:0008063	0.0390083511998044	8.19517795637199	0.326390001602307	2	7	Toll signaling pathway	0.285714285714286
GO:0015747	0.0390083511998044	8.19517795637199	0.326390001602307	2	7	urate transport	0.285714285714286
GO:0021861	0.0390083511998044	8.19517795637199	0.326390001602307	2	7	forebrain radial glial cell differentiation	0.285714285714286
GO:0030952	0.0390083511998044	8.19517795637199	0.326390001602307	2	7	establishment or maintenance of cytoskeleton polarity	0.285714285714286
GO:0031204	0.0390083511998044	8.19517795637199	0.326390001602307	2	7	posttranslational protein targeting to membrane, translocation	0.285714285714286
GO:0031580	0.0390083511998044	8.19517795637199	0.326390001602307	2	7	membrane raft distribution	0.285714285714286
GO:0032074	0.0390083511998044	8.19517795637199	0.326390001602307	2	7	negative regulation of nuclease activity	0.285714285714286
GO:0035900	0.0390083511998044	8.19517795637199	0.326390001602307	2	7	response to isolation stress	0.285714285714286
GO:0036089	0.0390083511998044	8.19517795637199	0.326390001602307	2	7	cleavage furrow formation	0.285714285714286
GO:0040009	0.0390083511998044	8.19517795637199	0.326390001602307	2	7	regulation of growth rate	0.285714285714286
GO:0040016	0.0390083511998044	8.19517795637199	0.326390001602307	2	7	embryonic cleavage	0.285714285714286
GO:0043376	0.0390083511998044	8.19517795637199	0.326390001602307	2	7	regulation of CD8-positive, alpha-beta T cell differentiation	0.285714285714286
GO:0044837	0.0390083511998044	8.19517795637199	0.326390001602307	2	7	actomyosin contractile ring organization	0.285714285714286
GO:0045110	0.0390083511998044	8.19517795637199	0.326390001602307	2	7	intermediate filament bundle assembly	0.285714285714286
GO:0046884	0.0390083511998044	8.19517795637199	0.326390001602307	2	7	follicle-stimulating hormone secretion	0.285714285714286
GO:0048289	0.0390083511998044	8.19517795637199	0.326390001602307	2	7	isotype switching to IgE isotypes	0.285714285714286
GO:0048293	0.0390083511998044	8.19517795637199	0.326390001602307	2	7	regulation of isotype switching to IgE isotypes	0.285714285714286
GO:0060696	0.0390083511998044	8.19517795637199	0.326390001602307	2	7	regulation of phospholipid catabolic process	0.285714285714286
GO:0061438	0.0390083511998044	8.19517795637199	0.326390001602307	2	7	renal system vasculature morphogenesis	0.285714285714286
GO:0061439	0.0390083511998044	8.19517795637199	0.326390001602307	2	7	kidney vasculature morphogenesis	0.285714285714286
GO:0070562	0.0390083511998044	8.19517795637199	0.326390001602307	2	7	regulation of vitamin D receptor signaling pathway	0.285714285714286
GO:0150003	0.0390083511998044	8.19517795637199	0.326390001602307	2	7	regulation of spontaneous synaptic transmission	0.285714285714286
GO:1900028	0.0390083511998044	8.19517795637199	0.326390001602307	2	7	negative regulation of ruffle assembly	0.285714285714286
GO:1905446	0.0390083511998044	8.19517795637199	0.326390001602307	2	7	regulation of mitochondrial ATP synthesis coupled electron transport	0.285714285714286
GO:1990144	0.0390083511998044	8.19517795637199	0.326390001602307	2	7	intrinsic apoptotic signaling pathway in response to hypoxia	0.285714285714286
GO:2000638	0.0390083511998044	8.19517795637199	0.326390001602307	2	7	regulation of SREBP signaling pathway	0.285714285714286
GO:0042744	1.06308163185209e-05	8.07382246376812	1.4920685787534	9	32	hydrogen peroxide catabolic process	0.28125
GO:0051382	0.00112297048384676	7.90366891173343	0.83928857554879	5	18	kinetochore assembly	0.277777777777778
GO:0032069	0.000396116921543316	7.7136678200692	1.02579714789297	6	22	regulation of nuclease activity	0.272727272727273
GO:0006183	0.0125825740438816	7.69051724137931	0.512898573946483	3	11	GTP biosynthetic process	0.272727272727273
GO:0019048	0.0125825740438816	7.69051724137931	0.512898573946483	3	11	modulation by virus of host process	0.272727272727273
GO:0035404	0.0125825740438816	7.69051724137931	0.512898573946483	3	11	histone-serine phosphorylation	0.272727272727273
GO:0039530	0.0125825740438816	7.69051724137931	0.512898573946483	3	11	MDA-5 signaling pathway	0.272727272727273
GO:0046940	0.0125825740438816	7.69051724137931	0.512898573946483	3	11	nucleoside monophosphate phosphorylation	0.272727272727273
GO:0090084	0.0125825740438816	7.69051724137931	0.512898573946483	3	11	negative regulation of inclusion body assembly	0.272727272727273
GO:0097494	0.0125825740438816	7.69051724137931	0.512898573946483	3	11	regulation of vesicle size	0.272727272727273
GO:1903423	0.0125825740438816	7.69051724137931	0.512898573946483	3	11	positive regulation of synaptic vesicle recycling	0.272727272727273
GO:1903579	5.06457526155397e-05	7.49469259064635	1.39881429258132	8	30	negative regulation of ATP metabolic process	0.266666666666667
GO:0002902	0.0014660259096316	7.33870967741935	0.885915718634834	5	19	regulation of B cell apoptotic process	0.263157894736842
GO:0031065	0.0014660259096316	7.33870967741935	0.885915718634834	5	19	positive regulation of histone deacetylation	0.263157894736842
GO:1903204	0.0014660259096316	7.33870967741935	0.885915718634834	5	19	negative regulation of oxidative stress-induced neuron death	0.263157894736842
GO:0002082	0.000514939811687204	7.25951557093426	1.07242429097901	6	23	regulation of oxidative phosphorylation	0.260869565217391
GO:0048821	2.35930954889303e-05	7.14102564102564	1.63195000801154	9	35	erythrocyte development	0.257142857142857
GO:0044321	0.000659729704136781	6.8558246828143	1.11905143406505	6	24	response to leptin	0.25
GO:0035067	0.00544903141759654	6.84234752589183	0.746034289376702	4	16	negative regulation of histone acetylation	0.25
GO:0050862	0.00544903141759654	6.84234752589183	0.746034289376702	4	16	positive regulation of T cell receptor signaling pathway	0.25
GO:0002903	0.0162033822185293	6.83563218390805	0.559525717032527	3	12	negative regulation of B cell apoptotic process	0.25
GO:0044650	0.0162033822185293	6.83563218390805	0.559525717032527	3	12	adhesion of symbiont to host cell	0.25
GO:0060019	0.0162033822185293	6.83563218390805	0.559525717032527	3	12	radial glial cell differentiation	0.25
GO:0071287	0.0162033822185293	6.83563218390805	0.559525717032527	3	12	cellular response to manganese ion	0.25
GO:0090557	0.0162033822185293	6.83563218390805	0.559525717032527	3	12	establishment of endothelial intestinal barrier	0.25
GO:1903332	0.0162033822185293	6.83563218390805	0.559525717032527	3	12	regulation of protein folding	0.25
GO:2000035	0.0162033822185293	6.83563218390805	0.559525717032527	3	12	regulation of stem cell division	0.25
GO:2001204	0.0162033822185293	6.83563218390805	0.559525717032527	3	12	regulation of osteoclast development	0.25
GO:0045648	0.000106099499212287	6.59421965317919	1.53869572183945	8	33	positive regulation of erythrocyte differentiation	0.242424242424242
GO:0046039	0.000834142185220373	6.49462757239119	1.1656785771511	6	25	GTP metabolic process	0.24
GO:0035518	0.00686622098571849	6.31565902451978	0.792661432462746	4	17	histone H2A monoubiquitination	0.235294117647059
GO:0090083	0.00686622098571849	6.31565902451978	0.792661432462746	4	17	regulation of inclusion body assembly	0.235294117647059
GO:0060669	0.00104204870932733	6.16955017301038	1.21230572023714	6	26	embryonic placenta morphogenesis	0.230769230769231
GO:0002430	0.020346325213167	6.15172413793103	0.606152860118571	3	13	complement receptor mediated signaling pathway	0.230769230769231
GO:0006264	0.020346325213167	6.15172413793103	0.606152860118571	3	13	mitochondrial DNA replication	0.230769230769231
GO:0015801	0.020346325213167	6.15172413793103	0.606152860118571	3	13	aromatic amino acid transport	0.230769230769231
GO:0018202	0.020346325213167	6.15172413793103	0.606152860118571	3	13	peptidyl-histidine modification	0.230769230769231
GO:0033262	0.020346325213167	6.15172413793103	0.606152860118571	3	13	regulation of nuclear cell cycle DNA replication	0.230769230769231
GO:0034112	0.020346325213167	6.15172413793103	0.606152860118571	3	13	positive regulation of homotypic cell-cell adhesion	0.230769230769231
GO:0035331	0.020346325213167	6.15172413793103	0.606152860118571	3	13	negative regulation of hippo signaling	0.230769230769231
GO:0051988	0.020346325213167	6.15172413793103	0.606152860118571	3	13	regulation of attachment of spindle microtubules to kinetochore	0.230769230769231
GO:0098814	0.020346325213167	6.15172413793103	0.606152860118571	3	13	spontaneous synaptic transmission	0.230769230769231
GO:1905244	0.020346325213167	6.15172413793103	0.606152860118571	3	13	regulation of modification of synaptic structure	0.230769230769231
GO:0048169	0.00295614787612956	6.0426267281106	1.02579714789297	5	22	regulation of long-term neuronal synaptic plasticity	0.227272727272727
GO:0060713	0.00295614787612956	6.0426267281106	1.02579714789297	5	22	labyrinthine layer morphogenesis	0.227272727272727
GO:0042743	2.02086373121584e-06	5.98100775193798	2.70437429899055	13	58	hydrogen peroxide metabolic process	0.224137931034483
GO:0006783	0.00128752049737967	5.87543252595156	1.25893286332319	6	27	heme biosynthetic process	0.222222222222222
GO:1903203	0.00128752049737967	5.87543252595156	1.25893286332319	6	27	regulation of oxidative stress-induced neuron death	0.222222222222222
GO:0048268	0.00850714970053897	5.86421173762946	0.83928857554879	4	18	clathrin coat assembly	0.222222222222222
GO:0042026	0.00363426122736354	5.70660522273425	1.07242429097901	5	23	protein refolding	0.217391304347826
GO:0051383	0.00363426122736354	5.70660522273425	1.07242429097901	5	23	kinetochore organization	0.217391304347826
GO:2001169	0.00363426122736354	5.70660522273425	1.07242429097901	5	23	regulation of ATP biosynthetic process	0.217391304347826
GO:0033260	0.000250066874649265	5.68339645206299	1.72520429418362	8	37	nuclear DNA replication	0.216216216216216
GO:0035641	0.0250148609466901	5.59216300940439	0.652780003204615	3	14	locomotory exploration behavior	0.214285714285714
GO:0036295	0.0250148609466901	5.59216300940439	0.652780003204615	3	14	cellular response to increased oxygen levels	0.214285714285714
GO:0051984	0.0250148609466901	5.59216300940439	0.652780003204615	3	14	positive regulation of chromosome segregation	0.214285714285714
GO:0071236	0.0250148609466901	5.59216300940439	0.652780003204615	3	14	cellular response to antibiotic	0.214285714285714
GO:0072531	0.0250148609466901	5.59216300940439	0.652780003204615	3	14	pyrimidine-containing compound transmembrane transport	0.214285714285714
GO:2001171	0.0250148609466901	5.59216300940439	0.652780003204615	3	14	positive regulation of ATP biosynthetic process	0.214285714285714
GO:1903715	0.000689290119833476	5.54130396162729	1.53869572183945	7	33	regulation of aerobic respiration	0.212121212121212
GO:0061515	7.5204707616021e-07	5.55506993006993	3.31052715910912	15	71	myeloid cell development	0.211267605633803
GO:0032695	0.0103847827114476	5.47295742232451	0.885915718634834	4	19	negative regulation of interleukin-12 production	0.210526315789474
GO:0042776	0.0103847827114476	5.47295742232451	0.885915718634834	4	19	mitochondrial ATP synthesis coupled proton transport	0.210526315789474
GO:0001783	0.00441703268084427	5.40595440213437	1.11905143406505	5	24	B cell apoptotic process	0.208333333333333
GO:0021591	0.00190833572572224	5.36392357454491	1.35218714949527	6	29	ventricular system development	0.206896551724138
GO:2000406	0.00190833572572224	5.36392357454491	1.35218714949527	6	29	positive regulation of T cell migration	0.206896551724138
GO:0031146	7.23057543556886e-05	5.29191550049024	2.28473001121615	10	49	SCF-dependent proteasomal ubiquitin-dependent protein catabolic process	0.204081632653061
GO:0018149	0.00100045882485332	5.14491916859122	1.63195000801154	7	35	peptide cross-linking	0.2
GO:0034508	0.00229265404688818	5.1401384083045	1.39881429258132	6	30	centromere complex assembly	0.2
GO:0070229	0.00229265404688818	5.1401384083045	1.39881429258132	6	30	negative regulation of lymphocyte apoptotic process	0.2
GO:1902751	0.00229265404688818	5.1401384083045	1.39881429258132	6	30	positive regulation of cell cycle G2/M phase transition	0.2
GO:0090312	0.00531275530475025	5.13536866359447	1.1656785771511	5	25	positive regulation of protein deacetylation	0.2
GO:0090201	0.0125108791020644	5.13060989643268	0.932542861720878	4	20	negative regulation of release of cytochrome c from mitochondria	0.2
GO:0097503	0.0125108791020644	5.13060989643268	0.932542861720878	4	20	sialylation	0.2
GO:2000757	0.0125108791020644	5.13060989643268	0.932542861720878	4	20	negative regulation of peptidyl-lysine acetylation	0.2
GO:0000722	0.0302082087352075	5.12586206896552	0.699407146290659	3	15	telomere maintenance via recombination	0.2
GO:0006089	0.0302082087352075	5.12586206896552	0.699407146290659	3	15	lactate metabolic process	0.2
GO:0006098	0.0302082087352075	5.12586206896552	0.699407146290659	3	15	pentose-phosphate shunt	0.2
GO:0006271	0.0302082087352075	5.12586206896552	0.699407146290659	3	15	DNA strand elongation involved in DNA replication	0.2
GO:0010889	0.0302082087352075	5.12586206896552	0.699407146290659	3	15	regulation of sequestering of triglyceride	0.2
GO:0016446	0.0302082087352075	5.12586206896552	0.699407146290659	3	15	somatic hypermutation of immunoglobulin genes	0.2
GO:0033147	0.0302082087352075	5.12586206896552	0.699407146290659	3	15	negative regulation of intracellular estrogen receptor signaling pathway	0.2
GO:0044406	0.0302082087352075	5.12586206896552	0.699407146290659	3	15	adhesion of symbiont to host	0.2
GO:0045176	0.0302082087352075	5.12586206896552	0.699407146290659	3	15	apical protein localization	0.2
GO:0051290	0.0302082087352075	5.12586206896552	0.699407146290659	3	15	protein heterotetramerization	0.2
GO:1902902	0.0302082087352075	5.12586206896552	0.699407146290659	3	15	negative regulation of autophagosome assembly	0.2
GO:1904424	0.0302082087352075	5.12586206896552	0.699407146290659	3	15	regulation of GTP binding	0.2
GO:0010332	4.61301194314145e-05	5.04911059551431	2.61112001281846	11	56	response to gamma radiation	0.196428571428571
GO:0044786	0.000524766441222896	4.9933788754598	1.9117128665278	8	41	cell cycle DNA replication	0.195121951219512
GO:0006779	0.00273244595143668	4.93425605536332	1.44544143566736	6	31	porphyrin-containing compound biosynthetic process	0.193548387096774
GO:0031063	0.00273244595143668	4.93425605536332	1.44544143566736	6	31	regulation of histone deacetylation	0.193548387096774
GO:0033014	0.00273244595143668	4.93425605536332	1.44544143566736	6	31	tetrapyrrole biosynthetic process	0.193548387096774
GO:0036475	0.00273244595143668	4.93425605536332	1.44544143566736	6	31	neuron death in response to oxidative stress	0.193548387096774
GO:0051443	0.00273244595143668	4.93425605536332	1.44544143566736	6	31	positive regulation of ubiquitin-protein transferase activity	0.193548387096774
GO:0071480	0.00273244595143668	4.93425605536332	1.44544143566736	6	31	cellular response to gamma radiation	0.193548387096774
GO:1902042	0.00273244595143668	4.93425605536332	1.44544143566736	6	31	negative regulation of extrinsic apoptotic signaling pathway via death domain receptors	0.193548387096774
GO:0002407	0.00632959020842236	4.8905529953917	1.21230572023714	5	26	dendritic cell chemotaxis	0.192307692307692
GO:0015985	0.00632959020842236	4.8905529953917	1.21230572023714	5	26	energy coupled proton transport, down electrochemical gradient	0.192307692307692
GO:0015986	0.00632959020842236	4.8905529953917	1.21230572023714	5	26	ATP synthesis coupled proton transport	0.192307692307692
GO:0042168	0.000622094502459626	4.84624277456647	1.95834000961384	8	42	heme metabolic process	0.19047619047619
GO:0030502	0.014895951206273	4.82853855005754	0.979170004806922	4	21	negative regulation of bone mineralization	0.19047619047619
GO:0035455	0.014895951206273	4.82853855005754	0.979170004806922	4	21	response to interferon-alpha	0.19047619047619
GO:0046597	0.014895951206273	4.82853855005754	0.979170004806922	4	21	negative regulation of viral entry into host cell	0.19047619047619
GO:0008156	0.00323249124365524	4.74421080649454	1.4920685787534	6	32	negative regulation of DNA replication	0.1875
GO:1905476	0.00323249124365524	4.74421080649454	1.4920685787534	6	32	negative regulation of protein localization to membrane	0.1875
GO:0001574	0.0359218650392716	4.73129973474801	0.746034289376702	3	16	ganglioside biosynthetic process	0.1875
GO:0002399	0.0359218650392716	4.73129973474801	0.746034289376702	3	16	MHC class II protein complex assembly	0.1875
GO:0002503	0.0359218650392716	4.73129973474801	0.746034289376702	3	16	peptide antigen assembly with MHC class II protein complex	0.1875
GO:0002566	0.0359218650392716	4.73129973474801	0.746034289376702	3	16	somatic diversification of immune receptors via somatic mutation	0.1875
GO:0002713	0.0359218650392716	4.73129973474801	0.746034289376702	3	16	negative regulation of B cell mediated immunity	0.1875
GO:0002890	0.0359218650392716	4.73129973474801	0.746034289376702	3	16	negative regulation of immunoglobulin mediated immune response	0.1875
GO:0006740	0.0359218650392716	4.73129973474801	0.746034289376702	3	16	NADPH regeneration	0.1875
GO:0009048	0.0359218650392716	4.73129973474801	0.746034289376702	3	16	dosage compensation by inactivation of X chromosome	0.1875
GO:0033631	0.0359218650392716	4.73129973474801	0.746034289376702	3	16	cell-cell adhesion mediated by integrin	0.1875
GO:0051014	0.0359218650392716	4.73129973474801	0.746034289376702	3	16	actin filament severing	0.1875
GO:0061684	0.0359218650392716	4.73129973474801	0.746034289376702	3	16	chaperone-mediated autophagy	0.1875
GO:0070230	0.0359218650392716	4.73129973474801	0.746034289376702	3	16	positive regulation of lymphocyte apoptotic process	0.1875
GO:0071732	0.0359218650392716	4.73129973474801	0.746034289376702	3	16	cellular response to nitric oxide	0.1875
GO:0090336	0.0359218650392716	4.73129973474801	0.746034289376702	3	16	positive regulation of brown fat cell differentiation	0.1875
GO:0010971	0.00747551514275025	4.66799329702556	1.25893286332319	5	27	positive regulation of G2/M transition of mitotic cell cycle	0.185185185185185
GO:1903421	0.00747551514275025	4.66799329702556	1.25893286332319	5	27	regulation of synaptic vesicle recycling	0.185185185185185
GO:0010823	0.000382261805392697	4.63802083333333	2.28473001121615	9	49	negative regulation of mitochondrion organization	0.183673469387755
GO:1903146	0.00379764704894896	4.5682429834679	1.53869572183945	6	33	regulation of autophagy of mitochondrion	0.181818181818182
GO:0010310	0.0175492408351938	4.56003068661296	1.02579714789297	4	22	regulation of hydrogen peroxide metabolic process	0.181818181818182
GO:0010866	0.0175492408351938	4.56003068661296	1.02579714789297	4	22	regulation of triglyceride biosynthetic process	0.181818181818182
GO:0035268	0.0175492408351938	4.56003068661296	1.02579714789297	4	22	protein mannosylation	0.181818181818182
GO:0043371	0.0175492408351938	4.56003068661296	1.02579714789297	4	22	negative regulation of CD4-positive, alpha-beta T cell differentiation	0.181818181818182
GO:0046628	0.0175492408351938	4.56003068661296	1.02579714789297	4	22	positive regulation of insulin receptor signaling pathway	0.181818181818182
GO:0090342	0.000104724242004186	4.54292343387471	2.84425572824868	11	61	regulation of cell aging	0.180327868852459
GO:0002313	0.0087582769580847	4.46478661590864	1.30556000640923	5	28	mature B cell differentiation involved in immune response	0.178571428571429
GO:0008299	0.0087582769580847	4.46478661590864	1.30556000640923	5	28	isoprenoid biosynthetic process	0.178571428571429
GO:0009206	6.39874358580108e-05	4.42857142857143	3.17064572985099	12	68	purine ribonucleoside triphosphate biosynthetic process	0.176470588235294
GO:0007095	0.0044328252826984	4.40484429065744	1.58532286492549	6	34	mitotic G2 DNA damage checkpoint signaling	0.176470588235294
GO:0000076	0.0421480744793187	4.39310344827586	0.792661432462746	3	17	DNA replication checkpoint signaling	0.176470588235294
GO:0007076	0.0421480744793187	4.39310344827586	0.792661432462746	3	17	mitotic chromosome condensation	0.176470588235294
GO:0021756	0.0421480744793187	4.39310344827586	0.792661432462746	3	17	striatum development	0.176470588235294
GO:0035269	0.0421480744793187	4.39310344827586	0.792661432462746	3	17	protein O-linked mannosylation	0.176470588235294
GO:0036035	0.0421480744793187	4.39310344827586	0.792661432462746	3	17	osteoclast development	0.176470588235294
GO:0042753	0.0421480744793187	4.39310344827586	0.792661432462746	3	17	positive regulation of circadian rhythm	0.176470588235294
GO:0045591	0.0421480744793187	4.39310344827586	0.792661432462746	3	17	positive regulation of regulatory T cell differentiation	0.176470588235294
GO:0060263	0.0421480744793187	4.39310344827586	0.792661432462746	3	17	regulation of respiratory burst	0.176470588235294
GO:0060977	0.0421480744793187	4.39310344827586	0.792661432462746	3	17	coronary vasculature morphogenesis	0.176470588235294
GO:0061298	0.0421480744793187	4.39310344827586	0.792661432462746	3	17	retina vasculature development in camera-type eye	0.176470588235294
GO:0009145	7.42165075973485e-05	4.35063267925912	3.21727287293703	12	69	purine nucleoside triphosphate biosynthetic process	0.173913043478261
GO:2000107	0.001166781174167	4.33513842409492	2.14484858195802	8	46	negative regulation of leukocyte apoptotic process	0.173913043478261
GO:0001919	0.0204787102263159	4.31978680879414	1.07242429097901	4	23	regulation of receptor recycling	0.173913043478261
GO:0045980	0.0204787102263159	4.31978680879414	1.07242429097901	4	23	negative regulation of nucleotide metabolic process	0.173913043478261
GO:0060307	0.0204787102263159	4.31978680879414	1.07242429097901	4	23	regulation of ventricular cardiac muscle cell membrane repolarization	0.173913043478261
GO:1903578	1.07896406055348e-05	4.31672494172494	4.05656144848582	15	87	regulation of ATP metabolic process	0.172413793103448
GO:0051654	0.0101853480481602	4.27851382488479	1.35218714949527	5	29	establishment of mitochondrion localization	0.172413793103448
GO:1902175	0.0101853480481602	4.27851382488479	1.35218714949527	5	29	regulation of oxidative stress-induced intrinsic apoptotic signaling pathway	0.172413793103448
GO:0006739	0.00514297006708013	4.25271447321322	1.63195000801154	6	35	NADP metabolic process	0.171428571428571
GO:0007020	0.00514297006708013	4.25271447321322	1.63195000801154	6	35	microtubule nucleation	0.171428571428571
GO:2000403	0.00514297006708013	4.25271447321322	1.63195000801154	6	35	positive regulation of lymphocyte migration	0.171428571428571
GO:0009205	2.36602032427147e-05	4.26193247962747	3.8234257330556	14	82	purine ribonucleoside triphosphate metabolic process	0.170731707317073
GO:0009144	1.24539647968598e-05	4.25735223680429	4.10318859157186	15	88	purine nucleoside triphosphate metabolic process	0.170454545454545
GO:0045646	0.0013495901418572	4.22374388617163	2.19147572504406	8	47	regulation of erythrocyte differentiation	0.170212765957447
GO:0072583	0.0013495901418572	4.22374388617163	2.19147572504406	8	47	clathrin-dependent endocytosis	0.170212765957447
GO:0033013	0.000362765845711348	4.20956795232577	2.75100144207659	10	59	tetrapyrrole metabolic process	0.169491525423729
GO:0030218	6.74894031171559e-07	4.16178194607268	5.59525717032527	20	120	erythrocyte differentiation	0.166666666666667
GO:0070228	0.000803622103422088	4.12152777777778	2.51786572664637	9	54	regulation of lymphocyte apoptotic process	0.166666666666667
GO:0030890	0.0030248613463306	4.11431870669746	1.95834000961384	7	42	positive regulation of B cell proliferation	0.166666666666667
GO:0032467	0.0030248613463306	4.11431870669746	1.95834000961384	7	42	positive regulation of cytokinesis	0.166666666666667
GO:2000404	0.0030248613463306	4.11431870669746	1.95834000961384	7	42	regulation of T cell migration	0.166666666666667
GO:0045746	0.00593303527307033	4.11072664359862	1.67857715109758	6	36	negative regulation of Notch signaling pathway	0.166666666666667
GO:0045070	0.0117638868484146	4.10714285714286	1.39881429258132	5	30	positive regulation of viral genome replication	0.166666666666667
GO:0051156	0.0236910457354102	4.10356731875719	1.11905143406505	4	24	glucose 6-phosphate metabolic process	0.166666666666667
GO:0070841	0.0236910457354102	4.10356731875719	1.11905143406505	4	24	inclusion body assembly	0.166666666666667
GO:0090343	0.0236910457354102	4.10356731875719	1.11905143406505	4	24	positive regulation of cell aging	0.166666666666667
GO:1901984	0.0236910457354102	4.10356731875719	1.11905143406505	4	24	negative regulation of protein acetylation	0.166666666666667
GO:1903077	0.0236910457354102	4.10356731875719	1.11905143406505	4	24	negative regulation of protein localization to plasma membrane	0.166666666666667
GO:0000712	0.0488762594350746	4.1	0.83928857554879	3	18	resolution of meiotic recombination intermediates	0.166666666666667
GO:0002501	0.0488762594350746	4.1	0.83928857554879	3	18	peptide antigen assembly with MHC protein complex	0.166666666666667
GO:0002544	0.0488762594350746	4.1	0.83928857554879	3	18	chronic inflammatory response	0.166666666666667
GO:0006595	0.0488762594350746	4.1	0.83928857554879	3	18	polyamine metabolic process	0.166666666666667
GO:0007549	0.0488762594350746	4.1	0.83928857554879	3	18	dosage compensation	0.166666666666667
GO:0010663	0.0488762594350746	4.1	0.83928857554879	3	18	positive regulation of striated muscle cell apoptotic process	0.166666666666667
GO:0010666	0.0488762594350746	4.1	0.83928857554879	3	18	positive regulation of cardiac muscle cell apoptotic process	0.166666666666667
GO:0019896	0.0488762594350746	4.1	0.83928857554879	3	18	axonal transport of mitochondrion	0.166666666666667
GO:0030730	0.0488762594350746	4.1	0.83928857554879	3	18	sequestering of triglyceride	0.166666666666667
GO:0045116	0.0488762594350746	4.1	0.83928857554879	3	18	protein neddylation	0.166666666666667
GO:0045623	0.0488762594350746	4.1	0.83928857554879	3	18	negative regulation of T-helper cell differentiation	0.166666666666667
GO:1900242	0.0488762594350746	4.1	0.83928857554879	3	18	regulation of synaptic vesicle endocytosis	0.166666666666667
GO:1902170	0.0488762594350746	4.1	0.83928857554879	3	18	cellular response to reactive nitrogen species	0.166666666666667
GO:1904872	0.0488762594350746	4.1	0.83928857554879	3	18	regulation of telomerase RNA localization to Cajal body	0.166666666666667
GO:0009142	3.59163459339641e-05	4.08116217678598	3.96330716231373	14	85	nucleoside triphosphate biosynthetic process	0.164705882352941
GO:0006513	0.000249549910232741	4.05481438515081	3.12401858676494	11	67	protein monoubiquitination	0.164179104477612
GO:0006778	0.00178316002675804	4.01725645002115	2.28473001121615	8	49	porphyrin-containing compound metabolic process	0.163265306122449
GO:1904706	0.00347040768168164	3.99980754426482	2.00496715269989	7	43	negative regulation of vascular associated smooth muscle cell proliferation	0.162790697674419
GO:0009201	0.000149224912705052	3.99865123075194	3.45040858836725	12	74	ribonucleoside triphosphate biosynthetic process	0.162162162162162
GO:0000462	0.00680796235010825	3.97789931912044	1.72520429418362	6	37	maturation of SSU-rRNA from tricistronic rRNA transcript (SSU-rRNA, 5.8S rRNA, LSU-rRNA)	0.162162162162162
GO:0097237	1.15449034217862e-06	4.00081161511408	5.78176574266944	20	124	cellular response to toxic substance	0.161290322580645
GO:0060045	0.0135007024055258	3.94895427153492	1.44544143566736	5	31	positive regulation of cardiac muscle cell proliferation	0.161290322580645
GO:0032469	0.0271916724841074	3.90794016110472	1.1656785771511	4	25	endoplasmic reticulum calcium ion homeostasis	0.16
GO:0036315	0.0271916724841074	3.90794016110472	1.1656785771511	4	25	cellular response to sterol	0.16
GO:1900078	0.0271916724841074	3.90794016110472	1.1656785771511	4	25	positive regulation of cellular response to insulin stimulus	0.16
GO:1903901	0.0271916724841074	3.90794016110472	1.1656785771511	4	25	negative regulation of viral life cycle	0.16
GO:0006754	0.00120029694108481	3.86328125	2.6577471559045	9	57	ATP biosynthetic process	0.157894736842105
GO:0046676	0.00777265859106459	3.85337370242215	1.77183143726967	6	38	negative regulation of insulin secretion	0.157894736842105
GO:1903580	0.00777265859106459	3.85337370242215	1.77183143726967	6	38	positive regulation of ATP metabolic process	0.157894736842105
GO:0009199	6.07067470616339e-05	3.86263096623981	4.14981573465791	14	89	ribonucleoside triphosphate metabolic process	0.157303370786517
GO:1902749	1.91463249524602e-05	3.85639467042957	4.75596859477648	16	102	regulation of cell cycle G2/M phase transition	0.156862745098039
GO:0045736	0.0154022229910573	3.80248335893497	1.4920685787534	5	32	negative regulation of cyclin-dependent protein serine/threonine kinase activity	0.15625
GO:0090140	0.0154022229910573	3.80248335893497	1.4920685787534	5	32	regulation of mitochondrial fission	0.15625
GO:2000273	0.00450945113331061	3.78886592925732	2.09822143887198	7	45	positive regulation of signaling receptor activity	0.155555555555556
GO:0002181	3.68562014247963e-07	3.83694117647059	6.9008171767345	23	148	cytoplasmic translation	0.155405405405405
GO:0045639	2.17021924624146e-05	3.81185369975456	4.80259573786252	16	103	positive regulation of myeloid cell differentiation	0.155339805825243
GO:0034101	2.18241363770262e-06	3.81621261172118	6.01490145809966	20	129	erythrocyte homeostasis	0.155038759689922
GO:0090207	0.00883197596541558	3.73639509279648	1.81845858035571	6	39	regulation of triglyceride metabolic process	0.153846153846154
GO:0001573	0.0309847783524137	3.73009729051156	1.21230572023714	4	26	ganglioside metabolic process	0.153846153846154
GO:0033522	0.0309847783524137	3.73009729051156	1.21230572023714	4	26	histone H2A ubiquitination	0.153846153846154
GO:0034643	0.0309847783524137	3.73009729051156	1.21230572023714	4	26	establishment of mitochondrion localization, microtubule-mediated	0.153846153846154
GO:0046639	0.0309847783524137	3.73009729051156	1.21230572023714	4	26	negative regulation of alpha-beta T cell differentiation	0.153846153846154
GO:0047497	0.0309847783524137	3.73009729051156	1.21230572023714	4	26	mitochondrion transport along microtubule	0.153846153846154
GO:0050857	0.0309847783524137	3.73009729051156	1.21230572023714	4	26	positive regulation of antigen receptor-mediated signaling pathway	0.153846153846154
GO:0051560	0.0309847783524137	3.73009729051156	1.21230572023714	4	26	mitochondrial calcium ion homeostasis	0.153846153846154
GO:1900017	0.0309847783524137	3.73009729051156	1.21230572023714	4	26	positive regulation of cytokine production involved in inflammatory response	0.153846153846154
GO:1902186	0.0309847783524137	3.73009729051156	1.21230572023714	4	26	regulation of viral release from host cell	0.153846153846154
GO:1904376	0.0309847783524137	3.73009729051156	1.21230572023714	4	26	negative regulation of protein localization to cell periphery	0.153846153846154
GO:0070227	0.000474954838703642	3.72140656498421	3.35715430219516	11	72	lymphocyte apoptotic process	0.152777777777778
GO:0071479	0.000474954838703642	3.72140656498421	3.35715430219516	11	72	cellular response to ionizing radiation	0.152777777777778
GO:0090329	0.00510941753623383	3.69150826079233	2.14484858195802	7	46	regulation of DNA-dependent DNA replication	0.152173913043478
GO:0009141	1.65663189425747e-05	3.71169454008854	5.22224002563692	17	112	nucleoside triphosphate metabolic process	0.151785714285714
GO:0072678	0.000908140884814374	3.6819235225956	3.0773914436789	10	66	T cell migration	0.151515151515152
GO:0002335	0.0174744686950053	3.66647465437788	1.53869572183945	5	33	mature B cell differentiation	0.151515151515152
GO:0010165	0.0174744686950053	3.66647465437788	1.53869572183945	5	33	response to X-ray	0.151515151515152
GO:0036336	0.0174744686950053	3.66647465437788	1.53869572183945	5	33	dendritic cell migration	0.151515151515152
GO:0046685	0.0174744686950053	3.66647465437788	1.53869572183945	5	33	response to arsenic-containing substance	0.151515151515152
GO:1901380	0.0174744686950053	3.66647465437788	1.53869572183945	5	33	negative regulation of potassium ion transmembrane transport	0.151515151515152
GO:1904030	0.0174744686950053	3.66647465437788	1.53869572183945	5	33	negative regulation of cyclin-dependent protein kinase activity	0.151515151515152
GO:2000772	0.0029755361831442	3.65934489402698	2.47123858356033	8	53	regulation of cellular senescence	0.150943396226415
GO:0035773	0.000536071615139347	3.66117805553477	3.4037814452812	11	73	insulin secretion involved in cellular response to glucose stimulus	0.150684931506849
GO:0070266	0.00999069063901746	3.62629757785467	1.86508572344176	6	40	necroptotic process	0.15
GO:0010389	0.000111728848724955	3.62019790454016	4.38295145008813	14	94	regulation of G2/M transition of mitotic cell cycle	0.148936170212766
GO:0002719	0.0350733458671378	3.56771901736128	1.25893286332319	4	27	negative regulation of cytokine production involved in immune response	0.148148148148148
GO:0008053	0.0350733458671378	3.56771901736128	1.25893286332319	4	27	mitochondrial fusion	0.148148148148148
GO:0010758	0.0350733458671378	3.56771901736128	1.25893286332319	4	27	regulation of macrophage chemotaxis	0.148148148148148
GO:0032781	0.0350733458671378	3.56771901736128	1.25893286332319	4	27	positive regulation of ATPase activity	0.148148148148148
GO:0034698	0.0350733458671378	3.56771901736128	1.25893286332319	4	27	response to gonadotropin	0.148148148148148
GO:0099625	0.0350733458671378	3.56771901736128	1.25893286332319	4	27	ventricular cardiac muscle cell membrane repolarization	0.148148148148148
GO:0030851	0.0197230279040237	3.5398458604799	1.58532286492549	5	34	granulocyte differentiation	0.147058823529412
GO:0032212	0.0197230279040237	3.5398458604799	1.58532286492549	5	34	positive regulation of telomere maintenance via telomerase	0.147058823529412
GO:0043516	0.0197230279040237	3.5398458604799	1.58532286492549	5	34	regulation of DNA damage response, signal transduction by p53 class mediator	0.147058823529412
GO:0051973	0.0197230279040237	3.5398458604799	1.58532286492549	5	34	positive regulation of telomerase activity	0.147058823529412
GO:1990748	2.64645806551019e-05	3.56092466723308	5.40874859798109	17	116	cellular detoxification	0.146551724137931
GO:1900371	0.0112534832847315	3.52249134948097	1.9117128665278	6	41	regulation of purine nucleotide biosynthetic process	0.146341463414634
GO:0090311	0.00648667068788743	3.51104038754013	2.23810286813011	7	48	regulation of protein deacetylation	0.145833333333333
GO:0002381	0.00144438093380988	3.43568945538818	3.26390001602307	10	70	immunoglobulin production involved in immunoglobulin-mediated immune response	0.142857142857143
GO:0043457	0.00727058913140898	3.42725173210162	2.28473001121615	7	49	regulation of cellular respiration	0.142857142857143
GO:0048168	0.00727058913140898	3.42725173210162	2.28473001121615	7	49	regulation of neuronal synaptic plasticity	0.142857142857143
GO:1902041	0.00727058913140898	3.42725173210162	2.28473001121615	7	49	regulation of extrinsic apoptotic signaling pathway via death domain receptors	0.142857142857143
GO:0030808	0.012624920274465	3.42445213379469	1.95834000961384	6	42	regulation of nucleotide biosynthetic process	0.142857142857143
GO:0046596	0.012624920274465	3.42445213379469	1.95834000961384	6	42	regulation of viral entry into host cell	0.142857142857143
GO:0071312	0.012624920274465	3.42445213379469	1.95834000961384	6	42	cellular response to alkaloid	0.142857142857143
GO:0032435	0.0221530375435143	3.42165898617512	1.63195000801154	5	35	negative regulation of proteasomal ubiquitin-dependent protein catabolic process	0.142857142857143
GO:0033280	0.0221530375435143	3.42165898617512	1.63195000801154	5	35	response to vitamin D	0.142857142857143
GO:0086005	0.0221530375435143	3.42165898617512	1.63195000801154	5	35	ventricular cardiac muscle cell action potential	0.142857142857143
GO:0007141	0.0394591906853133	3.41887226697353	1.30556000640923	4	28	male meiosis I	0.142857142857143
GO:0010818	0.0394591906853133	3.41887226697353	1.30556000640923	4	28	T cell chemotaxis	0.142857142857143
GO:0090344	0.0394591906853133	3.41887226697353	1.30556000640923	4	28	negative regulation of cell aging	0.142857142857143
GO:0099623	0.0394591906853133	3.41887226697353	1.30556000640923	4	28	regulation of cardiac muscle cell membrane repolarization	0.142857142857143
GO:0061178	0.00275006709758633	3.37026515151515	2.98413715750681	9	64	regulation of insulin secretion involved in cellular response to glucose stimulus	0.140625
GO:0002262	3.8755264976107e-06	3.39234887060974	7.32046146450889	22	157	myeloid cell homeostasis	0.140127388535032
GO:0060337	0.00812246496731733	3.34736022342768	2.3313571543022	7	50	type I interferon signaling pathway	0.14
GO:0006284	0.0141094358300515	3.33171233517254	2.00496715269989	6	43	base-excision repair	0.13953488372093
GO:0006458	0.0141094358300515	3.33171233517254	2.00496715269989	6	43	'de novo' protein folding	0.13953488372093
GO:0045981	0.0141094358300515	3.33171233517254	2.00496715269989	6	43	positive regulation of nucleotide metabolic process	0.13953488372093
GO:0090278	0.0141094358300515	3.33171233517254	2.00496715269989	6	43	negative regulation of peptide hormone secretion	0.13953488372093
GO:1900544	0.0141094358300515	3.33171233517254	2.00496715269989	6	43	positive regulation of purine nucleotide metabolic process	0.13953488372093
GO:0044409	7.20916639486187e-06	3.35969664138678	7.04069860599263	21	151	entry into host	0.139072847682119
GO:0046718	1.20692163326258e-05	3.3517376999584	6.71430860439032	20	144	viral entry into host cell	0.138888888888889
GO:0050709	0.00179579956327178	3.32448697342354	3.35715430219516	10	72	negative regulation of protein secretion	0.138888888888889
GO:0036314	0.024769166941973	3.3110970715029	1.67857715109758	5	36	response to sterol	0.138888888888889
GO:1902229	0.024769166941973	3.3110970715029	1.67857715109758	5	36	regulation of intrinsic apoptotic signaling pathway in response to DNA damage	0.138888888888889
GO:0071677	0.0030629058632041	3.30989583333333	3.03076430059285	9	65	positive regulation of mononuclear cell migration	0.138461538461538
GO:0001773	0.0441430055072579	3.2819332566168	1.35218714949527	4	29	myeloid dendritic cell activation	0.137931034482759
GO:0002360	0.0441430055072579	3.2819332566168	1.35218714949527	4	29	T cell lineage commitment	0.137931034482759
GO:0002862	0.0441430055072579	3.2819332566168	1.35218714949527	4	29	negative regulation of inflammatory response to antigenic stimulus	0.137931034482759
GO:0006688	0.0441430055072579	3.2819332566168	1.35218714949527	4	29	glycosphingolipid biosynthetic process	0.137931034482759
GO:0007143	0.0441430055072579	3.2819332566168	1.35218714949527	4	29	female meiotic nuclear division	0.137931034482759
GO:0010390	0.0441430055072579	3.2819332566168	1.35218714949527	4	29	histone monoubiquitination	0.137931034482759
GO:0072539	0.0441430055072579	3.2819332566168	1.35218714949527	4	29	T-helper 17 cell differentiation	0.137931034482759
GO:0052126	2.10501784443332e-06	3.31341118105445	8.15975004005768	24	175	movement in host environment	0.137142857142857
GO:0002792	0.0157113151978548	3.24385357858314	2.05159429578593	6	44	negative regulation of peptide secretion	0.136363636363636
GO:0009126	0.0157113151978548	3.24385357858314	2.05159429578593	6	44	purine nucleoside monophosphate metabolic process	0.136363636363636
GO:0032007	0.0157113151978548	3.24385357858314	2.05159429578593	6	44	negative regulation of TOR signaling	0.136363636363636
GO:0000422	0.00130317339754585	3.24129930394432	3.77679858996956	11	81	autophagy of mitochondrion	0.135802469135802
GO:0061726	0.00130317339754585	3.24129930394432	3.77679858996956	11	81	mitochondrion disassembly	0.135802469135802
GO:2000106	0.00130317339754585	3.24129930394432	3.77679858996956	11	81	regulation of leukocyte apoptotic process	0.135802469135802
GO:0001836	0.00582937313580563	3.22774566473988	2.75100144207659	8	59	release of cytochrome c from mitochondria	0.135593220338983
GO:0043687	0.0275756051594518	3.2074452764977	1.72520429418362	5	37	post-translational protein modification	0.135135135135135
GO:1904358	0.0275756051594518	3.2074452764977	1.72520429418362	5	37	positive regulation of telomere maintenance via telomere lengthening	0.135135135135135
GO:0071357	0.0100433188086899	3.19822940723634	2.42461144047428	7	52	cellular response to type I interferon	0.134615384615385
GO:2000378	0.0100433188086899	3.19822940723634	2.42461144047428	7	52	negative regulation of reactive oxygen species metabolic process	0.134615384615385
GO:0031398	0.00012975830460795	3.21682092646509	5.54863002723922	16	119	positive regulation of protein ubiquitination	0.134453781512605
GO:0016445	0.00377235671867009	3.19540229885057	3.12401858676494	9	67	somatic diversification of immunoglobulins	0.134328358208955
GO:0061136	2.08606597871451e-06	3.21890286512928	8.71927575709021	25	187	regulation of proteasomal protein catabolic process	0.133689839572193
GO:0006289	0.00645823847201835	3.1654957759004	2.79762858516263	8	60	nucleotide-excision repair	0.133333333333333
GO:0042551	0.0174346789000923	3.16050039925472	2.09822143887198	6	45	neuron maturation	0.133333333333333
GO:0007176	0.0491244083778491	3.15552801628751	1.39881429258132	4	30	regulation of epidermal growth factor-activated receptor activity	0.133333333333333
GO:0017145	0.0491244083778491	3.15552801628751	1.39881429258132	4	30	stem cell division	0.133333333333333
GO:0036296	0.0491244083778491	3.15552801628751	1.39881429258132	4	30	response to increased oxygen levels	0.133333333333333
GO:0046825	0.0491244083778491	3.15552801628751	1.39881429258132	4	30	regulation of protein export from nucleus	0.133333333333333
GO:0048799	0.0491244083778491	3.15552801628751	1.39881429258132	4	30	animal organ maturation	0.133333333333333
GO:0070168	0.0491244083778491	3.15552801628751	1.39881429258132	4	30	negative regulation of biomineral tissue development	0.133333333333333
GO:0051701	9.12722301282223e-07	3.2049081237911	9.46531004646691	27	203	biological process involved in interaction with host	0.133004926108374
GO:0006261	2.45260832898609e-05	3.17138433727392	7.04069860599263	20	151	DNA-dependent DNA replication	0.132450331125828
GO:1903202	0.0111188509473598	3.12852696053821	2.47123858356033	7	53	negative regulation of oxidative stress-induced cell death	0.132075471698113
GO:0010821	4.09888248651045e-05	3.15480093676815	6.71430860439032	19	144	regulation of mitochondrion organization	0.131944444444444
GO:0006858	0.0305760516092075	3.11007540846251	1.77183143726967	5	38	extracellular transport	0.131578947368421
GO:1903050	4.84183590186218e-07	3.16006368483412	10.3045986220157	29	221	regulation of proteolysis involved in cellular protein catabolic process	0.131221719457014
GO:0043030	0.00713716500836444	3.10559493946995	2.84425572824868	8	61	regulation of macrophage activation	0.131147540983607
GO:2000401	0.00713716500836444	3.10559493946995	2.84425572824868	8	61	regulation of lymphocyte migration	0.131147540983607
GO:0031057	0.0192834681046712	3.08131487889273	2.14484858195802	6	46	negative regulation of histone modification	0.130434782608696
GO:0031648	0.0192834681046712	3.08131487889273	2.14484858195802	6	46	protein destabilization	0.130434782608696
GO:0043462	0.0192834681046712	3.08131487889273	2.14484858195802	6	46	regulation of ATPase activity	0.130434782608696
GO:0044818	0.0192834681046712	3.08131487889273	2.14484858195802	6	46	mitotic G2/M transition checkpoint	0.130434782608696
GO:0061028	0.0192834681046712	3.08131487889273	2.14484858195802	6	46	establishment of endothelial barrier	0.130434782608696
GO:0071277	0.0019379208950599	3.06540415125102	3.96330716231373	11	85	cellular response to calcium ion	0.129411764705882
GO:1902750	0.00786855240839741	3.04791265253693	2.89088287133472	8	62	negative regulation of cell cycle G2/M phase transition	0.129032258064516
GO:0007569	0.000138625327095291	3.06272856562373	6.1547828873578	17	132	cell aging	0.128787878787879
GO:0098869	0.000824385110123072	3.05108350951374	4.70934145169043	13	101	cellular oxidant detoxification	0.128712871287129
GO:0010212	5.99735941601971e-05	3.05628778388977	6.9008171767345	19	148	response to ionizing radiation	0.128378378378378
GO:0032506	0.0337737097921181	3.0184331797235	1.81845858035571	5	39	cytokinetic process	0.128205128205128
GO:0043267	0.0337737097921181	3.0184331797235	1.81845858035571	5	39	negative regulation of potassium ion transport	0.128205128205128
GO:0051084	0.0337737097921181	3.0184331797235	1.81845858035571	5	39	'de novo' posttranslational protein folding	0.128205128205128
GO:2000785	0.0337737097921181	3.0184331797235	1.81845858035571	5	39	regulation of autophagosome assembly	0.128205128205128
GO:2000058	2.60118860281214e-05	3.05202895695853	7.6468514661112	21	164	regulation of ubiquitin-dependent protein catabolic process	0.128048780487805
GO:0006140	0.00213066972333768	3.02436194895592	4.00993430539978	11	86	regulation of nucleotide metabolic process	0.127906976744186
GO:0046677	0.0212614311448304	3.00599206684108	2.19147572504406	6	47	response to antibiotic	0.127659574468085
GO:0051972	0.0212614311448304	3.00599206684108	2.19147572504406	6	47	regulation of telomerase activity	0.127659574468085
GO:0061001	0.0212614311448304	3.00599206684108	2.19147572504406	6	47	regulation of dendritic spine morphogenesis	0.127659574468085
GO:0097300	0.0212614311448304	3.00599206684108	2.19147572504406	6	47	programmed necrotic cell death	0.127659574468085
GO:0061098	0.0135162212545253	2.99783487297921	2.56449286973241	7	55	positive regulation of protein tyrosine kinase activity	0.127272727272727
GO:0016239	0.00865480838279336	2.99232790331056	2.93751001442077	8	63	positive regulation of macroautophagy	0.126984126984127
GO:0046902	0.00865480838279336	2.99232790331056	2.93751001442077	8	63	regulation of mitochondrial membrane permeability	0.126984126984127
GO:0070059	0.00865480838279336	2.99232790331056	2.93751001442077	8	63	intrinsic apoptotic signaling pathway in response to endoplasmic reticulum stress	0.126984126984127
GO:0032434	0.000166875463800381	3.01003474718428	6.24803717352988	17	134	regulation of proteasomal ubiquitin-dependent protein catabolic process	0.126865671641791
GO:0000281	0.00557267487844316	2.9885752688172	3.31052715910912	9	71	mitotic cytokinesis	0.126760563380282
GO:0008585	0.00152202242801465	2.9834179925276	4.42957859317417	12	95	female gonad development	0.126315789473684
GO:0007052	0.000465048144530238	2.95454545454545	5.59525717032527	15	120	mitotic spindle organization	125
GO:0043903	0.00611222849489621	2.94097222222222	3.35715430219516	9	72	regulation of biological process involved in symbiotic interaction	125
GO:0001885	0.00949834285210867	2.93872832369942	2.98413715750681	8	64	endothelial cell development	125
GO:0030888	0.00949834285210867	2.93872832369942	2.98413715750681	8	64	regulation of B cell proliferation	125
GO:0046888	0.00949834285210867	2.93872832369942	2.98413715750681	8	64	negative regulation of hormone secretion	125
GO:1903051	0.00949834285210867	2.93872832369942	2.98413715750681	8	64	negative regulation of proteolysis involved in cellular protein catabolic process	125
GO:0042908	0.0233721112101079	2.93425605536332	2.23810286813011	6	48	xenobiotic transport	125
GO:0045005	0.0233721112101079	2.93425605536332	2.23810286813011	6	48	DNA-dependent DNA replication maintenance of fidelity	125
GO:0048146	0.0233721112101079	2.93425605536332	2.23810286813011	6	48	positive regulation of fibroblast proliferation	125
GO:0090199	0.0233721112101079	2.93425605536332	2.23810286813011	6	48	regulation of release of cytochrome c from mitochondria	125
GO:2000059	0.0233721112101079	2.93425605536332	2.23810286813011	6	48	negative regulation of ubiquitin-dependent protein catabolic process	125
GO:0031297	0.0371712839568467	2.93202764976959	1.86508572344176	5	40	replication fork processing	125
GO:0042274	0.00669110738599223	2.89485677083333	3.4037814452812	9	73	ribosomal small subunit biogenesis	0.123287671232877
GO:1903322	0.00023877550028944	2.90987294353904	6.43454574587406	17	138	positive regulation of protein modification by small protein conjugation or removal	0.123188405797101
GO:0090307	0.0104015620786216	2.88700943109218	3.03076430059285	8	65	mitotic spindle assembly	0.123076923076923
GO:0006611	0.016262825415672	2.87759815242494	2.6577471559045	7	57	protein export from nucleus	0.12280701754386
GO:0071887	0.00129891183016812	2.88623405851463	4.94247716712065	13	106	leukocyte apoptotic process	0.122641509433962
GO:1902850	0.00017109078324336	2.89204406364749	6.85419003364845	18	147	microtubule cytoskeleton organization involved in mitosis	0.122448979591837
GO:0002204	0.0256188352210891	2.86585660255894	2.28473001121615	6	49	somatic recombination of immunoglobulin genes involved in immune response	0.122448979591837
GO:0002208	0.0256188352210891	2.86585660255894	2.28473001121615	6	49	somatic diversification of immunoglobulins involved in immune response	0.122448979591837
GO:0008038	0.0256188352210891	2.86585660255894	2.28473001121615	6	49	neuron recognition	0.122448979591837
GO:0009395	0.0256188352210891	2.86585660255894	2.28473001121615	6	49	phospholipid catabolic process	0.122448979591837
GO:0034332	0.0256188352210891	2.86585660255894	2.28473001121615	6	49	adherens junction organization	0.122448979591837
GO:0045190	0.0256188352210891	2.86585660255894	2.28473001121615	6	49	isotype switching	0.122448979591837
GO:0052372	0.0256188352210891	2.86585660255894	2.28473001121615	6	49	modulation by symbiont of entry into host	0.122448979591837
GO:1901799	0.0256188352210891	2.86585660255894	2.28473001121615	6	49	negative regulation of proteasomal protein catabolic process	0.122448979591837
GO:0034644	0.00306323574924065	2.87058357073629	4.19644287774395	11	90	cellular response to UV	0.122222222222222
GO:0002312	0.004723822377361	2.86114329857088	3.8234257330556	10	82	B cell activation involved in immune response	0.121951219512195
GO:0009167	0.0407709784946405	2.85042242703533	1.9117128665278	5	41	purine ribonucleoside monophosphate metabolic process	0.121951219512195
GO:0050856	0.0407709784946405	2.85042242703533	1.9117128665278	5	41	regulation of T cell receptor signaling pathway	0.121951219512195
GO:0055023	0.0407709784946405	2.85042242703533	1.9117128665278	5	41	positive regulation of cardiac muscle tissue growth	0.121951219512195
GO:0060612	0.0407709784946405	2.85042242703533	1.9117128665278	5	41	adipose tissue development	0.121951219512195
GO:1900026	0.0407709784946405	2.85042242703533	1.9117128665278	5	41	positive regulation of substrate adhesion-dependent cell spreading	0.121951219512195
GO:0006635	0.00731111449414935	2.85016025641026	3.45040858836725	9	74	fatty acid beta-oxidation	0.121621621621622
GO:0051881	0.00731111449414935	2.85016025641026	3.45040858836725	9	74	regulation of mitochondrial membrane potential	0.121621621621622
GO:1903201	0.00731111449414935	2.85016025641026	3.45040858836725	9	74	regulation of oxidative stress-induced cell death	0.121621621621622
GO:0008637	0.00141690437207483	2.85536862939139	4.9891043102067	13	107	apoptotic mitochondrial changes	0.121495327102804
GO:2000060	0.00141690437207483	2.85536862939139	4.9891043102067	13	107	positive regulation of ubiquitin-dependent protein catabolic process	0.121495327102804
GO:0006303	0.0113668627912006	2.83707394857485	3.0773914436789	8	66	double-strand break repair via nonhomologous end joining	0.121212121212121
GO:0044403	2.60707927638331e-07	2.881861575179	13.5218714949527	35	290	biological process involved in symbiotic interaction	0.120689655172414
GO:0034340	0.017774639057907	2.82101616628176	2.70437429899055	7	58	response to type I interferon	0.120689655172414
GO:0046545	0.00236733640126559	2.81311371555274	4.66271430860439	12	100	development of primary female sexual characteristics	0.12
GO:0008088	0.00797406754466185	2.80681818181818	3.49703573145329	9	75	axo-dendritic transport	0.12
GO:0036465	0.00797406754466185	2.80681818181818	3.49703573145329	9	75	synaptic vesicle recycling	0.12
GO:0007632	0.028004703892058	2.80056621579113	2.3313571543022	6	50	visual behavior	0.12
GO:0030490	0.028004703892058	2.80056621579113	2.3313571543022	6	50	maturation of SSU-rRNA	0.12
GO:0046460	0.028004703892058	2.80056621579113	2.3313571543022	6	50	neutral lipid biosynthetic process	0.12
GO:0046463	0.028004703892058	2.80056621579113	2.3313571543022	6	50	acylglycerol biosynthetic process	0.12
GO:0046638	0.028004703892058	2.80056621579113	2.3313571543022	6	50	positive regulation of alpha-beta T cell differentiation	0.12
GO:0051646	0.028004703892058	2.80056621579113	2.3313571543022	6	50	mitochondrion localization	0.12
GO:0070231	0.028004703892058	2.80056621579113	2.3313571543022	6	50	T cell apoptotic process	0.12
GO:0051225	0.0010976645802054	2.80816483379861	5.45537574106714	14	117	spindle assembly	0.11965811965812
GO:0031058	0.00363926725294218	2.79938987711609	4.28969716391604	11	92	positive regulation of histone modification	0.119565217391304
GO:0032465	0.00363926725294218	2.79938987711609	4.28969716391604	11	92	regulation of cytokinesis	0.119565217391304
GO:1900542	0.00561093499918503	2.783501926028	3.91668001922769	10	84	regulation of purine nucleotide metabolic process	0.119047619047619
GO:0000266	0.0445744998757453	2.77322829742185	1.95834000961384	5	42	mitochondrial fission	0.119047619047619
GO:0019432	0.0445744998757453	2.77322829742185	1.95834000961384	5	42	triglyceride biosynthetic process	0.119047619047619
GO:0032689	0.0445744998757453	2.77322829742185	1.95834000961384	5	42	negative regulation of interferon-gamma production	0.119047619047619
GO:0043507	0.0445744998757453	2.77322829742185	1.95834000961384	5	42	positive regulation of JUN kinase activity	0.119047619047619
GO:1902895	0.0445744998757453	2.77322829742185	1.95834000961384	5	42	positive regulation of pri-miRNA transcription by RNA polymerase II	0.119047619047619
GO:0046939	0.00257537477759941	2.78134909760013	4.70934145169043	12	101	nucleotide phosphorylation	0.118811881188119
GO:0071453	8.07846382483877e-05	2.79563921993499	8.25300432622977	21	177	cellular response to oxygen levels	0.11864406779661
GO:0072332	0.00868179561823669	2.76476990049751	3.54366287453934	9	76	intrinsic apoptotic signaling pathway by p53 class mediator	0.118421052631579
GO:0090398	0.00395809086731816	2.76509535396978	4.33632430700208	11	93	cellular senescence	0.118279569892473
GO:0051224	0.000848591512477252	2.76879370629371	5.92164717192758	15	127	negative regulation of protein transport	0.118110236220472
GO:1903362	3.13114467890602e-06	2.78766310794781	11.8899214869412	30	255	regulation of cellular protein catabolic process	0.117647058823529
GO:0071331	0.000282958929374753	2.7625730994152	7.13395289216472	18	153	cellular response to hexose stimulus	0.117647058823529
GO:0010507	0.00610067021306839	2.74623406720742	3.96330716231373	10	85	negative regulation of autophagy	0.117647058823529
GO:0044774	0.00610067021306839	2.74623406720742	3.96330716231373	10	85	mitotic DNA integrity checkpoint signaling	0.117647058823529
GO:1901016	0.0134932128086787	2.74219653179191	3.17064572985099	8	68	regulation of potassium ion transmembrane transporter activity	0.117647058823529
GO:0021872	0.0305325829780391	2.73817762399077	2.37798429738824	6	51	forebrain generation of neurons	0.117647058823529
GO:0060043	0.0305325829780391	2.73817762399077	2.37798429738824	6	51	regulation of cardiac muscle cell proliferation	0.117647058823529
GO:0071326	0.000306764561093101	2.74210526315789	7.18058003525076	18	154	cellular response to monosaccharide stimulus	0.116883116883117
GO:0002200	0.00943613565815869	2.72395833333333	3.59029001762538	9	77	somatic diversification of immune receptors	0.116883116883117
GO:0002712	0.0210896541161603	2.71425770186065	2.79762858516263	7	60	regulation of B cell mediated immunity	0.116666666666667
GO:0002889	0.0210896541161603	2.71425770186065	2.79762858516263	7	60	regulation of immunoglobulin mediated immune response	0.116666666666667
GO:0010972	0.0210896541161603	2.71425770186065	2.79762858516263	7	60	negative regulation of G2/M transition of mitotic cell cycle	0.116666666666667
GO:0019395	0.00303609234372809	2.71991423210935	4.80259573786252	12	103	fatty acid oxidation	0.116504854368932
GO:0016266	0.0485830609343892	2.70009701673539	2.00496715269989	5	43	O-glycan processing	0.116279069767442
GO:0035794	0.0485830609343892	2.70009701673539	2.00496715269989	5	43	positive regulation of mitochondrial membrane permeability	0.116279069767442
GO:0042771	0.0485830609343892	2.70009701673539	2.00496715269989	5	43	intrinsic apoptotic signaling pathway in response to DNA damage by p53 class mediator	0.116279069767442
GO:0098815	0.0485830609343892	2.70009701673539	2.00496715269989	5	43	modulation of excitatory postsynaptic potential	0.116279069767442
GO:2001239	0.0485830609343892	2.70009701673539	2.00496715269989	5	43	regulation of extrinsic apoptotic signaling pathway in absence of ligand	0.116279069767442
GO:0061045	0.0102389289241673	2.68432971014493	3.63691716071142	9	78	negative regulation of wound healing	0.115384615384615
GO:0032206	0.0332050956957803	2.67850157966	2.42461144047428	6	52	positive regulation of telomere maintenance	0.115384615384615
GO:1900182	0.00717944733802445	2.67460233856526	4.05656144848582	10	87	positive regulation of protein localization to nucleus	0.114942528735632
GO:0044839	0.000546300774497488	2.68622922165941	6.9008171767345	17	148	cell cycle G2/M phase transition	0.114864864864865
GO:0042255	0.0228983101116153	2.66384398255068	2.84425572824868	7	61	ribosome assembly	0.114754098360656
GO:1904950	0.00116922224896592	2.67271521581866	6.10815574427175	15	131	negative regulation of establishment of protein localization	0.114503816793893
GO:1903008	0.00251697252062246	2.65642413078517	5.315494311809	13	114	organelle disassembly	0.114035087719298
GO:0010770	0.0110920174051129	2.64583333333333	3.68354430379747	9	79	positive regulation of cell morphogenesis involved in differentiation	0.113924050632911
GO:0031570	0.00178206039589064	2.65268981427091	5.7351385995834	14	123	DNA integrity checkpoint signaling	0.113821138211382
GO:2001237	0.00546266757068406	2.63589273188367	4.52283287934626	11	97	negative regulation of extrinsic apoptotic signaling pathway	0.11340206185567
GO:0070665	0.000637747361539676	2.64553615346778	6.99407146290659	17	150	positive regulation of leukocyte proliferation	0.113333333333333
GO:0001541	0.0360246163019616	2.62136494147096	2.47123858356033	6	53	ovarian follicle development	0.113207547169811
GO:0002707	0.0360246163019616	2.62136494147096	2.47123858356033	6	53	negative regulation of lymphocyte mediated immunity	0.113207547169811
GO:0008347	0.0360246163019616	2.62136494147096	2.47123858356033	6	53	glial cell migration	0.113207547169811
GO:0032210	0.0360246163019616	2.62136494147096	2.47123858356033	6	53	regulation of telomere maintenance via telomerase	0.113207547169811
GO:0051438	0.0360246163019616	2.62136494147096	2.47123858356033	6	53	regulation of ubiquitin-protein transferase activity	0.113207547169811
GO:0071478	0.000164134514490516	2.64180537772087	8.67264861400417	21	186	cellular response to radiation	0.112903225806452
GO:0010508	0.00192485529649703	2.62842628849614	5.78176574266944	14	124	positive regulation of autophagy	0.112903225806452
GO:0046824	0.0248111883647521	2.61526348939744	2.89088287133472	7	62	positive regulation of nucleocytoplasmic transport	0.112903225806452
GO:0048488	0.0248111883647521	2.61526348939744	2.89088287133472	7	62	synaptic vesicle endocytosis	0.112903225806452
GO:0140238	0.0248111883647521	2.61526348939744	2.89088287133472	7	62	presynaptic endocytosis	0.112903225806452
GO:0030099	8.00904589184473e-08	2.68416625080202	17.7649415157827	43	381	myeloid cell differentiation	0.112860892388451
GO:0071333	0.00068819195409801	2.62564513879202	7.04069860599263	17	151	cellular response to glucose stimulus	0.112582781456954
GO:0071456	0.00068819195409801	2.62564513879202	7.04069860599263	17	151	cellular response to hypoxia	0.112582781456954
GO:0070301	0.00590145177949116	2.60544843587487	4.5694600224323	11	98	cellular response to hydrogen peroxide	0.112244897959184
GO:0098754	0.000742014569052539	2.60604880581516	7.08732574907867	17	152	detoxification	0.111842105263158
GO:0036294	0.000527689776179047	2.60684578579315	7.50697003685307	18	161	cellular response to decreased oxygen levels	0.111801242236025
GO:0034440	0.004484313217645	2.57752613240418	5.03573145329274	12	108	lipid oxidation	0.111111111111111
GO:0006165	0.00636748237271993	2.57569605568445	4.61608716551835	11	99	nucleoside diphosphate phosphorylation	0.111111111111111
GO:0008630	0.00636748237271993	2.57569605568445	4.61608716551835	11	99	intrinsic apoptotic signaling pathway in response to DNA damage	0.111111111111111
GO:0032436	0.00906718962142159	2.57387022016222	4.19644287774395	10	90	positive regulation of proteasomal ubiquitin-dependent protein catabolic process	0.111111111111111
GO:1904705	0.00906718962142159	2.57387022016222	4.19644287774395	10	90	regulation of vascular associated smooth muscle cell proliferation	0.111111111111111
GO:0044773	0.0129564298960414	2.57204861111111	3.77679858996956	9	81	mitotic DNA damage checkpoint signaling	0.111111111111111
GO:0030330	0.0185939281455688	2.57023121387283	3.35715430219516	8	72	DNA damage response, signal transduction by p53 class mediator	0.111111111111111
GO:0042770	0.000435361939416647	2.57338017174083	8.01986861079955	19	172	signal transduction in response to DNA damage	0.11046511627907
GO:0071322	0.000611806948067711	2.57059891107078	7.60022432302516	18	163	cellular response to carbohydrate stimulus	0.110429447852761
GO:1990874	0.0097740879778399	2.54195098922793	4.24307002082999	10	91	vascular associated smooth muscle cell proliferation	0.10989010989011
GO:0016575	0.0139714089051938	2.53667237442922	3.8234257330556	9	82	histone deacetylation	0.109756097560976
GO:2001252	0.0139714089051938	2.53667237442922	3.8234257330556	9	82	positive regulation of chromosome organization	0.109756097560976
GO:0042542	0.00130333794199747	2.54483439547617	6.80756289056241	16	146	response to hydrogen peroxide	0.10958904109589
GO:0000086	0.00183748546085469	2.54041040926287	6.38791860278802	15	137	G2/M transition of mitotic cell cycle	0.109489051094891
GO:0050671	0.00183748546085469	2.54041040926287	6.38791860278802	15	137	positive regulation of lymphocyte proliferation	0.109489051094891
GO:0098930	0.0289592753550007	2.52321623921235	2.98413715750681	7	64	axonal transport	0.109375
GO:1900076	0.0289592753550007	2.52321623921235	2.98413715750681	7	64	regulation of cellular response to insulin stimulus	0.109375
GO:0045620	0.0421129027922315	2.51408798813643	2.56449286973241	6	55	negative regulation of lymphocyte differentiation	0.109090909090909
GO:0006476	0.00738578892826411	2.51817478731632	4.70934145169043	11	101	protein deacetylation	0.108910891089109
GO:0032946	0.00197503315911821	2.51961453180965	6.43454574587406	15	138	positive regulation of mononuclear cell proliferation	0.108695652173913
GO:0007093	0.00278859283298032	2.51343827504176	6.01490145809966	14	129	mitotic cell cycle checkpoint signaling	0.108527131782946
GO:0046785	0.0150439858543972	2.50225225225225	3.87005287614164	9	83	microtubule polymerization	0.108433734939759
GO:0000302	0.000114623252955018	2.52018417389442	10.3512257651017	24	222	response to reactive oxygen species	0.108108108108108
GO:0043467	0.00299470583074385	2.49163020352455	6.06152860118571	14	130	regulation of generation of precursor metabolites and energy	0.107692307692308
GO:0038034	0.0311989993711155	2.47957314645218	3.03076430059285	7	65	signal transduction in absence of ligand	0.107692307692308
GO:0046503	0.0311989993711155	2.47957314645218	3.03076430059285	7	65	glycerolipid catabolic process	0.107692307692308
GO:0048524	0.0311989993711155	2.47957314645218	3.03076430059285	7	65	positive regulation of viral process	0.107692307692308
GO:0097192	0.0311989993711155	2.47957314645218	3.03076430059285	7	65	extrinsic apoptotic signaling pathway in absence of ligand	0.107692307692308
GO:1901796	0.0113130978081048	2.48041994164375	4.33632430700208	10	93	regulation of signal transduction by p53 class mediator	0.10752688172043
GO:0042176	4.3941877381399e-07	2.53446153527872	18.2312129466432	42	391	regulation of protein catabolic process	0.107416879795396
GO:0009411	0.00161437586372966	2.48701099306025	6.94744431982054	16	149	response to UV	0.10738255033557
GO:0031122	0.0453851303134617	2.4636678200692	2.61112001281846	6	56	cytoplasmic microtubule organization	0.107142857142857
GO:0042733	0.0453851303134617	2.4636678200692	2.61112001281846	6	56	embryonic digit morphogenesis	0.107142857142857
GO:0043470	0.0453851303134617	2.4636678200692	2.61112001281846	6	56	regulation of carbohydrate catabolic process	0.107142857142857
GO:0046622	0.0453851303134617	2.4636678200692	2.61112001281846	6	56	positive regulation of organ growth	0.107142857142857
GO:0048008	0.0453851303134617	2.4636678200692	2.61112001281846	6	56	platelet-derived growth factor receptor signaling pathway	0.107142857142857
GO:0050773	0.00852673009102829	2.46315444365984	4.80259573786252	11	103	regulation of dendrite development	0.106796116504854
GO:0048662	0.0232315393550935	2.45473211974808	3.49703573145329	8	75	negative regulation of smooth muscle cell proliferation	0.106666666666667
GO:1903363	0.0232315393550935	2.45473211974808	3.49703573145329	8	75	negative regulation of cellular protein catabolic process	0.106666666666667
GO:0048872	3.01265465275376e-05	2.48962904452636	12.6825829194039	29	272	homeostasis of number of cells	0.106617647058824
GO:0000075	0.000936830204767821	2.46761937957476	7.87998718154142	18	169	cell cycle checkpoint signaling	0.106508875739645
GO:0009152	0.000936830204767821	2.46761937957476	7.87998718154142	18	169	purine ribonucleotide biosynthetic process	0.106508875739645
GO:0006119	0.00244004061573185	2.45920745920746	6.57442717513219	15	141	oxidative phosphorylation	0.106382978723404
GO:0016241	0.00244004061573185	2.45920745920746	6.57442717513219	15	141	regulation of macroautophagy	0.106382978723404
GO:0000079	0.0121481335180258	2.45075318655852	4.38295145008813	10	94	regulation of cyclin-dependent protein serine/threonine kinase activity	0.106382978723404
GO:0032091	0.0121481335180258	2.45075318655852	4.38295145008813	10	94	negative regulation of protein binding	0.106382978723404
GO:1903035	0.0121481335180258	2.45075318655852	4.38295145008813	10	94	negative regulation of response to wounding	0.106382978723404
GO:0042093	0.0335519647280546	2.43740948056523	3.0773914436789	7	66	T-helper cell differentiation	0.106060606060606
GO:0046626	0.0335519647280546	2.43740948056523	3.0773914436789	7	66	regulation of insulin receptor signaling pathway	0.106060606060606
GO:0045069	0.0173690774267015	2.43612938596491	3.96330716231373	9	85	regulation of viral genome replication	0.105882352941176
GO:1903052	0.00368914195466467	2.42840512223516	6.20141003044384	14	133	positive regulation of proteolysis involved in cellular protein catabolic process	0.105263157894737
GO:0046660	0.00690040728498628	2.42508710801394	5.315494311809	12	114	female sex differentiation	0.105263157894737
GO:1901800	0.00690040728498628	2.42508710801394	5.315494311809	12	114	positive regulation of proteasomal protein catabolic process	0.105263157894737
GO:0008593	0.0130288053205038	2.42178447276941	4.42957859317417	10	95	regulation of Notch signaling pathway	0.105263157894737
GO:1901379	0.0130288053205038	2.42178447276941	4.42957859317417	10	95	regulation of potassium ion transmembrane transport	0.105263157894737
GO:0016447	0.0488112838308488	2.41522491349481	2.6577471559045	6	57	somatic recombination of immunoglobulin gene segments	0.105263157894737
GO:1900024	0.0488112838308488	2.41522491349481	2.6577471559045	6	57	regulation of substrate adhesion-dependent cell spreading	0.105263157894737
GO:0009746	0.000242056276161691	2.4372268907563	10.2113443358436	23	219	response to hexose	0.105022831050228
GO:0045637	0.000339015160184361	2.42870715303648	9.79170004806922	22	210	regulation of myeloid cell differentiation	0.104761904761905
GO:0046034	4.21382242952127e-05	2.4387421648066	12.9157186348342	29	277	ATP metabolic process	0.104693140794224
GO:0001678	0.00114835152669154	2.41913875598086	8.01986861079955	18	172	cellular glucose homeostasis	0.104651162790698
GO:0072593	0.000141129324316608	2.42957591253747	11.1438871975645	25	239	reactive oxygen species metabolic process	0.104602510460251
GO:0048814	0.036020087541574	2.39665127020785	3.12401858676494	7	67	regulation of dendrite morphogenesis	0.104477611940299
GO:0061077	0.036020087541574	2.39665127020785	3.12401858676494	7	67	chaperone-mediated protein folding	0.104477611940299
GO:0043161	7.02691484557708e-07	2.45431482025664	19.2103829514501	43	412	proteasome-mediated ubiquitin-dependent protein catabolic process	0.104368932038835
GO:0000077	0.00738747007607503	2.40140725956497	5.36212145489505	12	115	DNA damage checkpoint signaling	0.104347826086957
GO:0071675	0.00738747007607503	2.40140725956497	5.36212145489505	12	115	regulation of mononuclear cell migration	0.104347826086957
GO:0097193	3.43908365622754e-05	2.4265496979227	13.4286172087806	30	288	intrinsic apoptotic signaling pathway	0.104166666666667
GO:0010769	0.0139565708399314	2.39348944999865	4.47620573626021	10	96	regulation of cell morphogenesis involved in differentiation	0.104166666666667
GO:0006260	8.79003440033555e-05	2.41306729978997	12.1230572023714	27	260	DNA replication	0.103846153846154
GO:0009749	0.000386852391131997	2.40286968891088	9.88495433424131	22	212	response to glucose	0.10377358490566
GO:0002687	0.0042210669151112	2.3879968058188	6.29466431661593	14	135	positive regulation of leukocyte migration	0.103703703703704
GO:2001242	0.00172448526359498	2.39168891855808	7.6468514661112	17	164	regulation of intrinsic apoptotic signaling pathway	0.103658536585366
GO:0098732	0.00790112884445367	2.37818279281694	5.40874859798109	12	116	macromolecule deacylation	0.103448275862069
GO:0051262	0.0199457610723207	2.37339743589744	4.05656144848582	9	87	protein tetramerization	0.103448275862069
GO:0150104	0.0199457610723207	2.37339743589744	4.05656144848582	9	87	transport across blood-brain barrier	0.103448275862069
GO:0002294	0.0386051387404309	2.35722939461629	3.17064572985099	7	68	CD4-positive, alpha-beta T cell differentiation involved in immune response	0.102941176470588
GO:0009247	0.0386051387404309	2.35722939461629	3.17064572985099	7	68	glycolipid biosynthetic process	0.102941176470588
GO:0010812	0.0386051387404309	2.35722939461629	3.17064572985099	7	68	negative regulation of cell-substrate adhesion	0.102941176470588
GO:0046637	0.0386051387404309	2.35722939461629	3.17064572985099	7	68	regulation of alpha-beta T cell differentiation	0.102941176470588
GO:0072676	0.00844234096709216	2.35540069686411	5.45537574106714	12	117	lymphocyte migration	0.102564102564103
GO:0030500	0.0286271771637407	2.34913294797688	3.63691716071142	8	78	regulation of bone mineralization	0.102564102564103
GO:0043154	0.0286271771637407	2.34913294797688	3.63691716071142	8	78	negative regulation of cysteine-type endopeptidase activity involved in apoptotic process	0.102564102564103
GO:0090559	0.0286271771637407	2.34913294797688	3.63691716071142	8	78	regulation of membrane permeability	0.102564102564103
GO:0006839	0.000148996236606367	2.37252221462748	11.8432943438552	26	254	mitochondrial transport	0.102362204724409
GO:0010232	0.0213327229816056	2.34322257383966	4.10318859157186	9	88	vascular transport	0.102272727272727
GO:0034284	0.000357937486758808	2.36403028538148	10.4911071943599	23	225	response to monosaccharide	0.102222222222222
GO:0010498	1.76256282295975e-07	2.40389925991384	22.8473001121615	50	490	proteasomal protein catabolic process	0.102040816326531
GO:1902882	0.0159591803992895	2.33882861055515	4.5694600224323	10	98	regulation of response to oxidative stress	0.102040816326531
GO:1904029	0.0159591803992895	2.33882861055515	4.5694600224323	10	98	regulation of cyclin-dependent protein kinase activity	0.102040816326531
GO:2001243	0.0159591803992895	2.33882861055515	4.5694600224323	10	98	negative regulation of intrinsic apoptotic signaling pathway	0.102040816326531
GO:0034446	0.0119770763722421	2.33552993517832	5.03573145329274	11	108	substrate adhesion-dependent cell spreading	0.101851851851852
GO:0002287	0.0413087400864331	2.3190791924309	3.21727287293703	7	69	alpha-beta T cell activation involved in immune response	0.101449275362319
GO:0002293	0.0413087400864331	2.3190791924309	3.21727287293703	7	69	alpha-beta T cell differentiation involved in immune response	0.101449275362319
GO:0007004	0.0413087400864331	2.3190791924309	3.21727287293703	7	69	telomere maintenance via telomerase	0.101449275362319
GO:0070192	0.0413087400864331	2.3190791924309	3.21727287293703	7	69	chromosome organization involved in meiotic cell cycle	0.101449275362319
GO:0007059	1.48594799112421e-05	2.35542057724332	16.1329915077712	35	346	chromosome segregation	0.101156069364162
GO:1900407	0.0227876449080285	2.31380208333333	4.14981573465791	9	89	regulation of cellular response to oxidative stress	0.101123595505618
GO:0031647	6.48856746796205e-05	2.33467891857439	13.8948886396411	30	298	regulation of protein stability	0.100671140939597
GO:1901988	0.000267143698010659	2.31979658018868	11.6101586284249	25	249	negative regulation of cell cycle phase transition	0.100401606425703
GO:0002685	0.000843730690408284	2.30320813771518	9.79170004806922	21	210	regulation of leukocyte migration	0.1
GO:0031396	0.000843730690408284	2.30320813771518	9.79170004806922	21	210	regulation of protein ubiquitination	0.1
GO:0046390	0.00145880797643951	2.30015612802498	8.85915718634834	19	190	ribose phosphate biosynthetic process	0.1
GO:0099111	0.00145880797643951	2.30015612802498	8.85915718634834	19	190	microtubule-based transport	0.1
GO:0009062	0.0181674567055762	2.28659714175357	4.66271430860439	10	100	fatty acid catabolic process	0.1
GO:0061640	0.0181674567055762	2.28659714175357	4.66271430860439	10	100	cytoskeleton-dependent cytokinesis	0.1
GO:0061097	0.0243121399398737	2.28510802469136	4.19644287774395	9	90	regulation of protein tyrosine kinase activity	0.1
GO:0048145	0.0326702731026233	2.28362235067437	3.73017144688351	8	80	regulation of fibroblast proliferation	0.1
GO:0045123	0.0441323606990983	2.28214010777521	3.26390001602307	7	70	cellular extravasation	0.1
GO:0042177	0.0109021633798393	2.26845251414506	5.64188431341131	12	121	negative regulation of protein catabolic process	0.0991735537190083
GO:0009260	0.00217026042514899	2.27034659820282	8.48614004165999	18	182	ribonucleotide biosynthetic process	0.0989010989010989
GO:0048144	0.0348306942759473	2.25221316018687	3.77679858996956	8	81	fibroblast proliferation	0.0987654320987654
GO:0051817	0.0348306942759473	2.25221316018687	3.77679858996956	8	81	modulation of process of other organism involved in symbiotic interaction	0.0987654320987654
GO:1903533	0.0348306942759473	2.25221316018687	3.77679858996956	8	81	regulation of protein targeting	0.0987654320987654
GO:0031109	0.0115957807954031	2.2477035159962	5.68851145649736	12	122	microtubule polymerization or depolymerization	0.0983606557377049
GO:0035601	0.0154308995077209	2.24252831315614	5.22224002563692	11	112	protein deacylation	0.0982142857142857
GO:0072331	0.00400806105132137	2.24837472912152	7.60022432302516	16	163	signal transduction by p53 class mediator	0.098159509202454
GO:0044242	0.00107430357393059	2.25496241698898	9.9782086204134	21	214	cellular lipid catabolic process	0.0981308411214953
GO:1904063	0.0205926797167652	2.23663660637816	4.75596859477648	10	102	negative regulation of cation transmembrane transport	0.0980392156862745
GO:0007051	0.00244695070608575	2.2427393785669	8.57939432783208	18	184	spindle organization	0.0978260869565217
GO:0019058	8.49292284769983e-05	2.26103350331379	14.7808043582759	31	317	viral life cycle	0.0977917981072555
GO:0071482	0.0123228473437753	2.22732837366984	5.7351385995834	12	123	cellular response to light stimulus	0.0975609756097561
GO:1901987	1.52640538419206e-05	2.26226183995645	18.1845858035571	38	390	regulation of cell cycle phase transition	0.0974358974358974
GO:0032760	0.0218900936550164	2.21246215377715	4.80259573786252	10	103	positive regulation of tumor necrosis factor production	0.0970873786407767
GO:0022408	0.00209051499015417	2.22143055610686	9.13892004486461	19	196	negative regulation of cell-cell adhesion	0.0969387755102041
GO:0043393	0.00209051499015417	2.22143055610686	9.13892004486461	19	196	regulation of protein binding	0.0969387755102041
GO:0010970	0.00596319939474355	2.21153846153846	7.2272071783368	15	155	transport along microtubule	0.0967741935483871
GO:0046434	0.00596319939474355	2.21153846153846	7.2272071783368	15	155	organophosphate catabolic process	0.0967741935483871
GO:1903364	0.00596319939474355	2.21153846153846	7.2272071783368	15	155	positive regulation of cellular protein catabolic process	0.0967741935483871
GO:0009132	0.0130843605545539	2.20731707317073	5.78176574266944	12	124	nucleoside diphosphate metabolic process	0.0967741935483871
GO:0045132	0.0293185553032762	2.203125	4.33632430700208	9	93	meiotic chromosome segregation	0.0967741935483871
GO:0043367	0.0394368738924767	2.19190751445087	3.87005287614164	8	83	CD4-positive, alpha-beta T cell differentiation	0.0963855421686747
GO:0050886	0.0394368738924767	2.19190751445087	3.87005287614164	8	83	endocrine process	0.0963855421686747
GO:1901292	0.0394368738924767	2.19190751445087	3.87005287614164	8	83	nucleoside phosphate catabolic process	0.0963855421686747
GO:0061982	0.0104541589035276	2.19656881433473	6.29466431661593	13	135	meiosis I cell cycle process	0.0962962962962963
GO:0002573	0.00178389355950479	2.20273876929984	9.69844576189713	20	208	myeloid leukocyte differentiation	0.0961538461538462
GO:0030316	0.0311365999628909	2.17708333333333	4.38295145008813	9	94	osteoclast differentiation	0.0957446808510638
GO:0051702	0.0311365999628909	2.17708333333333	4.38295145008813	9	94	biological process involved in interaction with symbiont	0.0957446808510638
GO:0009636	0.000573537186511082	2.19093324576069	12.2163114885435	25	262	response to toxic substance	0.0954198473282443
GO:0010948	0.00028487355460722	2.19047025848645	13.7083800672969	28	294	negative regulation of cell cycle process	0.0952380952380952
GO:0045732	0.00122489990183689	2.18207681365576	10.7708700528761	22	231	positive regulation of protein catabolic process	0.0952380952380952
GO:2001235	0.0147147216628857	2.16834769851458	5.87502002884153	12	126	positive regulation of apoptotic signaling pathway	0.0952380952380952
GO:0040029	0.0246612289413111	2.16564005610782	4.89585002403461	10	105	regulation of gene expression, epigenetic	0.0952380952380952
GO:2001022	0.0246612289413111	2.16564005610782	4.89585002403461	10	105	positive regulation of response to DNA damage stimulus	0.0952380952380952
GO:0042440	0.0418853919909456	2.16294493459081	3.91668001922769	8	84	pigment metabolic process	0.0952380952380952
GO:1903320	0.000986903488305318	2.17842062852538	11.2837686268226	23	242	regulation of protein modification by small protein conjugation or removal	0.0950413223140496
GO:0072522	0.00262867229065482	2.17184649423577	9.32542861720878	19	200	purine-containing compound biosynthetic process	95
GO:0006720	0.019583650846698	2.15661252900232	5.40874859798109	11	116	isoprenoid metabolic process	0.0948275862068965
GO:0007006	0.019583650846698	2.15661252900232	5.40874859798109	11	116	mitochondrial membrane organization	0.0948275862068965
GO:0008286	0.019583650846698	2.15661252900232	5.40874859798109	11	116	insulin receptor signaling pathway	0.0948275862068965
GO:0036473	0.0330316017277919	2.15164728682171	4.42957859317417	9	95	cell death in response to oxidative stress	0.0947368421052632
GO:1903900	0.00938011700574058	2.15474432262436	6.9008171767345	14	148	regulation of viral life cycle	0.0945945945945946
GO:0007568	0.000127696339955662	2.17430002285165	15.8066015061689	32	339	aging	0.0943952802359882
GO:0006164	0.00365842931166702	2.15114085792516	8.90578432943439	18	191	purine nucleotide biosynthetic process	0.0942408376963351
GO:0055072	0.0444325415560618	2.13473462953232	3.96330716231373	8	85	iron ion homeostasis	0.0941176470588235
GO:0060021	0.0444325415560618	2.13473462953232	3.96330716231373	8	85	roof of mouth development	0.0941176470588235
GO:0072384	0.0444325415560618	2.13473462953232	3.96330716231373	8	85	organelle transport along microtubule	0.0941176470588235
GO:0045862	6.71093342200156e-05	2.17047442334795	17.3452972280083	35	372	positive regulation of proteolysis	0.0940860215053763
GO:0016032	2.69526683553438e-05	2.17321674575233	19.3502643807082	39	415	viral process	0.0939759036144578
GO:0001952	0.0164948457089483	2.13072209539829	5.96827431501362	12	128	regulation of cell-matrix adhesion	0.09375
GO:0051304	0.0350048807851568	2.12679597701149	4.47620573626021	9	96	chromosome separation	0.09375
GO:1901990	0.000374772798451516	2.14944431101116	13.9415157827271	28	299	regulation of mitotic cell cycle phase transition	0.0936454849498328
GO:0045930	0.00152796486448463	2.14061336290363	10.9573786252203	22	235	negative regulation of mitotic cell cycle	0.0936170212765957
GO:0051402	0.00122979283350613	2.1388604589818	11.4702771991668	23	246	neuron apoptotic process	0.0934959349593496
GO:0006275	0.0276760728436294	2.12074876658982	4.9891043102067	10	107	regulation of DNA replication	0.0934579439252336
GO:0031532	0.0276760728436294	2.12074876658982	4.9891043102067	10	107	actin cytoskeleton reorganization	0.0934579439252336
GO:0036503	0.0276760728436294	2.12074876658982	4.9891043102067	10	107	ERAD pathway	0.0934579439252336
GO:0051341	0.0276760728436294	2.12074876658982	4.9891043102067	10	107	regulation of oxidoreductase activity	0.0934579439252336
GO:1903557	0.0276760728436294	2.12074876658982	4.9891043102067	10	107	positive regulation of tumor necrosis factor superfamily cytokine production	0.0934579439252336
GO:0042593	0.00104486650878627	2.12811452387424	12.0298029161993	24	258	glucose homeostasis	0.0930232558139535
GO:0007127	0.0174435532095944	2.11239167336728	6.01490145809966	12	129	meiosis I	0.0930232558139535
GO:0006493	0.0470794578256688	2.10724766562917	4.00993430539978	8	86	protein O-linked glycosylation	0.0930232558139535
GO:2000117	0.0470794578256688	2.10724766562917	4.00993430539978	8	86	negative regulation of cysteine-type endopeptidase activity	0.0930232558139535
GO:0120162	0.037057698887675	2.10250946969697	4.52283287934626	9	97	positive regulation of cold-induced thermogenesis	0.0927835051546392
GO:0030902	0.0110847135802148	2.10720324940731	7.04069860599263	14	151	hindbrain development	0.0927152317880795
GO:2001236	0.0110847135802148	2.10720324940731	7.04069860599263	14	151	regulation of extrinsic apoptotic signaling pathway	0.0927152317880795
GO:0033500	0.00110216487034495	2.11893842568228	12.0764300592854	24	259	carbohydrate homeostasis	0.0926640926640927
GO:0051271	0.000114635178706934	2.13173125449645	17.1121615125781	34	367	negative regulation of cellular component movement	0.0926430517711172
GO:0140694	0.000114635178706934	2.13173125449645	17.1121615125781	34	367	non-membrane-bounded organelle assembly	0.0926430517711172
GO:0051100	0.00885690817706125	2.10539460539461	7.55359717993911	15	162	negative regulation of binding	0.0925925925925926
GO:0031056	0.011703661568178	2.09181555904236	7.08732574907867	14	152	regulation of histone modification	0.0921052631578947
GO:0048041	0.0498271739525901	2.0804565742299	4.05656144848582	8	87	focal adhesion assembly	0.0919540229885057
GO:0031032	0.00479824499708366	2.09012418687167	9.13892004486461	18	196	actomyosin structure organization	0.0918367346938776
GO:0034766	0.0309445623249932	2.07767126654728	5.08235859637879	10	109	negative regulation of ion transmembrane transport	0.0917431192660551
GO:0043266	0.0309445623249932	2.07767126654728	5.08235859637879	10	109	regulation of potassium ion transport	0.0917431192660551
GO:0002761	0.0245097052110112	2.07700249047447	5.59525717032527	11	120	regulation of myeloid leukocyte differentiation	0.0916666666666667
GO:0050680	0.00986110491021056	2.07689961045666	7.6468514661112	15	164	negative regulation of epithelial cell proliferation	0.0914634146341463
GO:0010952	0.00505796502046015	2.07832990296971	9.18554718795065	18	197	positive regulation of peptidase activity	0.0913705583756345
GO:0071248	0.00505796502046015	2.07832990296971	9.18554718795065	18	197	cellular response to metal ion	0.0913705583756345
GO:2001020	0.00325600313260339	2.0796832933719	10.2113443358436	20	219	regulation of response to DNA damage stimulus	0.091324200913242
GO:0009743	0.00177928442312425	2.07294117647059	11.7966672007691	23	253	response to carbohydrate	0.0909090909090909
GO:0035264	0.0205360688418413	2.05923344947735	6.1547828873578	12	132	multicellular organism growth	0.0909090909090909
GO:0042752	0.0258704593941284	2.05800464037123	5.64188431341131	11	121	regulation of circadian rhythm	0.0909090909090909
GO:0042100	0.0414066927029005	2.05555555555556	4.61608716551835	9	99	B cell proliferation	0.0909090909090909
GO:0060996	0.0414066927029005	2.05555555555556	4.61608716551835	9	99	dendritic spine development	0.0909090909090909
GO:0051302	0.00875448145652701	2.05124042412866	8.25300432622977	16	177	regulation of cell division	0.0903954802259887
GO:0001890	0.0172211142696934	2.04462098349015	6.71430860439032	13	144	placenta development	0.0902777777777778
GO:0072329	0.0272850671831913	2.03934909387346	5.68851145649736	11	122	monocarboxylic acid catabolic process	0.0901639344262295
GO:0071902	0.00590705723921986	2.04372469635628	9.32542861720878	18	200	positive regulation of protein serine/threonine kinase activity	0.09
GO:0006641	0.043705078680658	2.03285256410256	4.66271430860439	9	100	triglyceride metabolic process	0.09
GO:0006664	0.043705078680658	2.03285256410256	4.66271430860439	9	100	glycolipid metabolic process	0.09
GO:0009060	0.00737483015534667	2.04117311454032	8.8125300432623	17	189	aerobic respiration	0.0899470899470899
GO:1903706	0.000249723432545213	2.06026518391788	17.1121615125781	33	367	regulation of hemopoiesis	0.0899182561307902
GO:0009314	4.67920443332464e-05	2.07030525949954	21.261977247236	41	456	response to radiation	0.0899122807017544
GO:1903047	3.27503861967033e-07	2.09524077407741	33.8046787373818	65	725	mitotic cell cycle process	0.0896551724137931
GO:0098727	0.0228127713009845	2.02524704403953	6.24803717352988	12	134	maintenance of cell number	0.0895522388059701
GO:0010950	0.00969884955322017	2.02584275293326	8.34625861240186	16	179	positive regulation of endopeptidase activity	0.0893854748603352
GO:1901991	0.00969884955322017	2.02584275293326	8.34625861240186	16	179	negative regulation of mitotic cell cycle phase transition	0.0893854748603352
GO:0000070	0.0121377813297727	2.02214452214452	7.83336003845538	15	168	mitotic sister chromatid segregation	0.0892857142857143
GO:0010633	0.0363432671246268	2.0162224797219	5.22224002563692	10	112	negative regulation of epithelial cell migration	0.0892857142857143
GO:0043406	0.0363432671246268	2.0162224797219	5.22224002563692	10	112	positive regulation of MAP kinase activity	0.0892857142857143
GO:0046632	0.0363432671246268	2.0162224797219	5.22224002563692	10	112	alpha-beta T cell differentiation	0.0892857142857143
GO:1902107	0.0152117061899761	2.01810529400751	7.32046146450889	14	157	positive regulation of leukocyte differentiation	0.089171974522293
GO:1903708	0.0152117061899761	2.01810529400751	7.32046146450889	14	157	positive regulation of hemopoiesis	0.089171974522293
GO:2000377	0.0152117061899761	2.01810529400751	7.32046146450889	14	157	regulation of reactive oxygen species metabolic process	0.089171974522293
GO:2000146	0.000359263848309676	2.03898809848477	16.7391443678898	32	359	negative regulation of cell motility	0.0891364902506964
GO:0000819	0.00653512389445473	2.02128146453089	9.41868290338087	18	202	sister chromatid segregation	0.0891089108910891
GO:1903509	0.0460874200922243	2.01064311594203	4.70934145169043	9	101	liposaccharide metabolic process	0.0891089108910891
GO:0050821	0.00816022395275179	2.01748308088946	8.90578432943439	17	191	protein stabilization	0.0890052356020942
GO:0098813	0.00155605413980617	2.02613686615566	13.1022272071783	25	281	nuclear chromosome segregation	0.0889679715302491
GO:0048660	0.0102004101269498	2.01337621310869	8.3928857554879	16	180	regulation of smooth muscle cell proliferation	0.0888888888888889
GO:0071897	0.0102004101269498	2.01337621310869	8.3928857554879	16	180	DNA biosynthetic process	0.0888888888888889
GO:0044770	2.24091356410498e-05	2.0479064619925	24.1528601185707	46	518	cell cycle phase transition	0.0888030888030888
GO:0021537	0.00299259167171602	2.01599367740191	11.5635314853389	22	248	telencephalon development	0.0887096774193548
GO:0071241	0.00464038774871854	2.00821771247112	10.5377343374459	20	226	cellular response to inorganic substance	0.0884955752212389
GO:0010506	0.000939523540658276	2.01350504698921	14.7808043582759	28	317	regulation of autophagy	0.0883280757097792
GO:0045786	0.000283320757444251	2.02033352688895	17.9514500881269	34	385	negative regulation of cell cycle	0.0883116883116883
GO:0043624	0.0252703632689064	1.99235697426099	6.34129145970197	12	136	cellular protein complex disassembly	0.0882352941176471
GO:0035710	0.048554653031785	1.98891129032258	4.75596859477648	9	102	CD4-positive, alpha-beta T cell activation	0.0882352941176471
GO:1902106	0.048554653031785	1.98891129032258	4.75596859477648	9	102	negative regulation of leukocyte differentiation	0.0882352941176471
GO:1990542	0.048554653031785	1.98891129032258	4.75596859477648	9	102	mitochondrial transmembrane transport	0.0882352941176471
GO:1903039	0.00410659631015734	1.99353921695309	11.1438871975645	21	239	positive regulation of leukocyte cell-cell adhesion	0.0878661087866109
GO:0031330	0.00278266496157985	1.99386167856264	12.2163114885435	23	262	negative regulation of cellular catabolic process	0.0877862595419847
GO:0002286	0.0402856245255835	1.97722613423656	5.315494311809	10	114	T cell activation involved in immune response	0.087719298245614
GO:0021987	0.0402856245255835	1.97722613423656	5.315494311809	10	114	cerebral cortex development	0.087719298245614
GO:0002285	0.00946274782122469	1.98295184539838	9.04566575869252	17	194	lymphocyte activation involved in immune response	0.0876288659793814
GO:0050777	0.00946274782122469	1.98295184539838	9.04566575869252	17	194	negative regulation of immune response	0.0876288659793814
GO:0006979	0.000128378235654109	2.00412741060223	20.7957058163756	39	446	response to oxidative stress	0.0874439461883408
GO:0031929	0.0335025222990446	1.96797135075154	5.87502002884153	11	126	TOR signaling	0.0873015873015873
GO:0051592	0.0221902709072118	1.96889534883721	6.94744431982054	13	149	response to calcium ion	0.087248322147651
GO:0030336	0.000773658592096953	1.98744248248974	16.0397372215991	30	344	negative regulation of cell migration	0.0872093023255814
GO:0044843	0.00451979089768697	1.97519206145967	11.2371414837366	21	241	cell cycle G1/S phase transition	0.0871369294605809
GO:2001233	0.000653528002384048	1.9852914306596	16.5992629386316	31	356	regulation of apoptotic signaling pathway	0.0870786516853933
GO:0030900	0.000445163179185245	1.98744838976053	17.6716872296106	33	379	forebrain development	0.0870712401055409
GO:0040013	0.000376117552761597	1.98569725864124	18.2312129466432	34	391	negative regulation of locomotion	0.0869565217391304
GO:0048659	0.012415238634159	1.96499416569428	8.57939432783208	16	184	smooth muscle cell proliferation	0.0869565217391304
GO:0030278	0.0423627482437898	1.95828505214368	5.36212145489505	10	115	regulation of ossification	0.0869565217391304
GO:1901989	0.0423627482437898	1.95828505214368	5.36212145489505	10	115	positive regulation of cell cycle phase transition	0.0869565217391304
GO:0034599	0.00217687240931973	1.97142460004304	13.4286172087806	25	288	cellular response to oxidative stress	0.0868055555555556
GO:0071674	0.0104195450824766	1.96057406150473	9.13892004486461	17	196	mononuclear cell migration	0.086734693877551
GO:0000910	0.0155386374878186	1.95759936266265	8.0664957538856	15	173	cytokinesis	0.0867052023121387
GO:0006974	4.93032539647231e-07	2.02133589275083	37.1152058964909	69	796	cellular response to DNA damage stimulus	0.0866834170854271
GO:0072521	0.000281139755716689	1.97736276174307	19.3968915237943	36	416	purine-containing compound metabolic process	0.0865384615384615
GO:1901215	0.00875120024221337	1.95678670360111	9.69844576189713	18	208	negative regulation of neuron death	0.0865384615384615
GO:0016358	0.00496689465936658	1.9571754853445	11.3303957699087	21	243	dendrite development	0.0864197530864197
GO:0007018	0.000511469595429236	1.97002660663119	17.8115686588688	33	382	microtubule-based movement	0.0863874345549738
GO:0010639	0.000931402500052891	1.96199556838783	16.2262457939433	30	348	negative regulation of organelle organization	0.0862068965517241
GO:0043281	0.0091731908143114	1.94643152383577	9.74507290498318	18	209	regulation of cysteine-type endopeptidase activity involved in apoptotic process	0.0861244019138756
GO:0031345	0.0136555640328748	1.9416569428238	8.67264861400417	16	186	negative regulation of cell projection organization	0.0860215053763441
GO:0070997	0.000822905427970047	1.95465342258691	16.8323986540618	31	361	neuron death	0.0858725761772853
GO:0006163	0.000473138476803864	1.95771077117589	18.4643486620734	34	396	purine nucleotide metabolic process	0.0858585858585859
GO:0070663	0.00544996554259412	1.93948063380282	11.4236500560808	21	245	regulation of leukocyte proliferation	0.0857142857142857
GO:0007292	0.0307575042930911	1.92966027874564	6.52780003204615	12	140	female gamete generation	0.0857142857142857
GO:0033044	0.0143109142390286	1.93019304386988	8.71927575709021	16	187	regulation of chromosome organization	0.0855614973262032
GO:0051603	2.10354247266814e-06	1.98236987178909	34.9237301714469	64	749	proteolysis involved in cellular protein catabolic process	0.0854472630173565
GO:0051098	0.000900745916355917	1.94265661219701	16.9256529402339	31	363	regulation of binding	0.0853994490358127
GO:0050792	0.0214134715393366	1.92316647264261	7.6468514661112	14	164	regulation of viral process	0.0853658536585366
GO:0006638	0.0387796506186111	1.9176137480829	6.01490145809966	11	129	neutral lipid metabolic process	0.0852713178294574
GO:0043280	0.0387796506186111	1.9176137480829	6.01490145809966	11	129	positive regulation of cysteine-type endopeptidase activity involved in apoptotic process	0.0852713178294574
GO:0043632	9.90070502009001e-06	1.96723127712482	30.6340330075308	56	657	modification-dependent macromolecule catabolic process	0.0852359208523592
GO:0019941	1.22757998663062e-05	1.96352996661413	30.1211344335844	55	646	modification-dependent protein catabolic process	0.0851393188854489
GO:0008584	0.0322535808866947	1.91459363098614	6.57442717513219	12	141	male gonad development	0.0851063829787234
GO:0000278	3.42280816206525e-07	1.98229174421202	41.1717673449768	75	883	mitotic cell cycle	0.0849377123442809
GO:0006511	1.59027693654133e-05	1.95627053359012	29.6548630027239	54	636	ubiquitin-dependent protein catabolic process	0.0849056603773585
GO:0044772	0.000403256506986297	1.93570557587851	19.7699086684826	36	424	mitotic cell cycle phase transition	0.0849056603773585
GO:0043523	0.0105377680812004	1.91600651112317	9.88495433424131	18	212	regulation of neuron apoptotic process	0.0849056603773585
GO:0022407	0.000287290038827926	1.93579669928436	20.8889601025477	38	448	regulation of cell-cell adhesion	0.0848214285714286
GO:0090068	0.00743136651953777	1.91415917676176	11.0040057683064	20	236	positive regulation of cell cycle process	0.0847457627118644
GO:0045446	0.0490285690797838	1.90356637054204	5.50200288415318	10	118	endothelial cell differentiation	0.0847457627118644
GO:0033002	0.00624667559333817	1.91352298814916	11.5635314853389	21	248	muscle cell proliferation	0.0846774193548387
GO:0006282	0.040660463563522	1.90139211136891	6.06152860118571	11	130	regulation of DNA repair	0.0846153846153846
GO:0071214	0.00179415049278217	1.91894076981663	15.4335843614805	28	331	cellular response to abiotic stimulus	0.0845921450151057
GO:0104004	0.00179415049278217	1.91894076981663	15.4335843614805	28	331	cellular response to environmental stimulus	0.0845921450151057
GO:0044257	1.43717001588659e-06	1.96420469889279	37.4882230411793	68	804	cellular protein catabolic process	0.0845771144278607
GO:0046546	0.0338010620046707	1.89975877780756	6.62105431821823	12	142	development of primary male sexual characteristics	0.0845070422535211
GO:0050670	0.00925471265781832	1.90557286100816	10.4911071943599	19	225	regulation of lymphocyte proliferation	0.0844444444444444
GO:0009895	0.00222459564184029	1.91238835233462	14.920685787534	27	320	negative regulation of catabolic process	0.084375
GO:0031331	0.000460011966906533	1.92052360916316	19.9097900977407	36	427	positive regulation of cellular catabolic process	0.0843091334894614
GO:0051321	0.00549322996545598	1.90493094513469	12.1696843454575	22	261	meiotic cell cycle	0.0842911877394636
GO:0006109	0.0196307038186662	1.89701402891587	8.29963146931581	15	178	regulation of carbohydrate metabolic process	0.0842696629213483
GO:0009150	0.00112415061763025	1.91328756599026	17.1587886556642	31	368	purine ribonucleotide metabolic process	0.0842391304347826
GO:0000723	0.0426035470996237	1.88544083526682	6.10815574427175	11	131	telomere maintenance	0.083969465648855
GO:0019079	0.0426035470996237	1.88544083526682	6.10815574427175	11	131	viral genome replication	0.083969465648855
GO:0019827	0.0426035470996237	1.88544083526682	6.10815574427175	11	131	stem cell population maintenance	0.083969465648855
GO:0034763	0.0354007564673704	1.88515041093704	6.66768146130428	12	143	negative regulation of transmembrane transport	0.0839160839160839
GO:0062013	0.0354007564673704	1.88515041093704	6.66768146130428	12	143	positive regulation of small molecule metabolic process	0.0839160839160839
GO:0034614	0.0294765254006812	1.8850638716017	7.2272071783368	13	155	cellular response to reactive oxygen species	0.0838709677419355
GO:1903034	0.0245868099164074	1.88513775708188	7.78673289536933	14	167	regulation of response to wounding	0.0838323353293413
GO:0032944	0.0101171922628503	1.88703611961809	10.584361480532	19	227	regulation of mononuclear cell proliferation	0.0837004405286344
GO:0006302	0.00713654885331265	1.88824249846908	11.703412914597	21	251	double-strand break repair	0.0836653386454183
GO:0140014	0.00424615561002364	1.89033844334869	13.3819900656946	24	287	mitotic nuclear division	0.0836236933797909
GO:0070482	0.0018009874192535	1.89434856478584	16.1796186508572	29	347	response to oxygen levels	0.0835734870317003
GO:0031329	2.30797647809333e-06	1.93403676819078	38.0011216151258	68	815	regulation of cellular catabolic process	0.0834355828220859
GO:0009896	0.000243942315891535	1.90111451048951	22.9405543983336	41	492	positive regulation of catabolic process	0.0833333333333333
GO:0019693	0.00095034367989267	1.89253246753247	18.4643486620734	33	396	ribose phosphate metabolic process	0.0833333333333333
GO:1903037	0.00223073082235404	1.88725121032813	15.6667200769108	28	336	regulation of leukocyte cell-cell adhesion	0.0833333333333333
GO:0050870	0.0126033881641756	1.87687400318979	10.0714629065855	18	216	positive regulation of T cell activation	0.0833333333333333
GO:0099173	0.0257185397879196	1.87279077151021	7.83336003845538	14	168	postsynapse organization	0.0833333333333333
GO:0033135	0.0370534512126137	1.8707633829585	6.71430860439032	12	144	regulation of peptidyl-serine phosphorylation	0.0833333333333333
GO:0030097	2.11278392545211e-06	1.92984092694423	38.6539016183304	69	829	hemopoiesis	0.083232810615199
GO:0007346	0.000423670155628045	1.89323882068798	21.3086043903221	38	457	regulation of mitotic cell cycle	0.0831509846827133
GO:0062197	0.00232818362769219	1.88103636468088	15.7133472199968	28	337	cellular response to chemical stress	0.0830860534124629
GO:0045860	0.00122664048520386	1.8805699429654	17.9980772312129	32	386	positive regulation of protein kinase activity	0.0829015544041451
GO:0043068	0.000118318987962201	1.89499766001573	25.8780644127544	46	555	positive regulation of programmed cell death	0.0828828828828829
GO:0032640	0.0224509781076076	1.86241469374	8.43951289857395	15	181	tumor necrosis factor production	0.0828729281767956
GO:0032680	0.0224509781076076	1.86241469374	8.43951289857395	15	181	regulation of tumor necrosis factor production	0.0828729281767956
GO:0010564	3.1561282766395e-05	1.9021647249072	30.4008972921006	54	652	regulation of cell cycle process	0.0828220858895705
GO:0043524	0.0387599102195917	1.85659270126536	6.76093574747637	12	145	negative regulation of neuron apoptotic process	0.0827586206896552
GO:0009165	0.00812733748402744	1.86361300852324	11.8432943438552	21	254	nucleotide biosynthetic process	0.0826771653543307
GO:0007017	1.68383750239018e-06	1.91573033707865	40.6588687710303	72	872	microtubule-based process	0.0825688073394495
GO:0050803	0.0137496102740747	1.85789473684211	10.1647171927576	18	218	regulation of synapse structure or activity	0.0825688073394495
GO:0016236	0.00504086645685525	1.86159526739985	13.5684986380388	24	291	macroautophagy	0.0824742268041237
GO:1902105	0.0059924113646402	1.85965992647059	13.0089729210062	23	279	regulation of leukocyte differentiation	0.0824372759856631
GO:0021700	0.00625060864663237	1.8523186083772	13.0556000640923	23	280	developmental maturation	0.0821428571428571
GO:0000226	7.67712346361455e-05	1.87922366141587	28.3959301394007	50	609	microtubule cytoskeleton organization	0.0821018062397373
GO:0061041	0.0488140441045979	1.8391432290193	6.24803717352988	11	134	regulation of wound healing	0.082089552238806
GO:0030705	0.0204728747728573	1.84309302947139	9.09229290177856	16	195	cytoskeleton-dependent intracellular transport	0.0820512820512821
GO:1901293	0.00884788754791442	1.84754270302667	11.9365486300272	21	256	nucleoside phosphate biosynthetic process	0.08203125
GO:0006898	0.0105365559376325	1.84495896834701	11.3770229129947	20	244	receptor-mediated endocytosis	0.0819672131147541
GO:0048469	0.0293452382258573	1.83669353343764	7.97324146771351	14	171	cell maturation	0.0818713450292398
GO:0002064	0.0149761985974746	1.83929129755081	10.2579714789297	18	220	epithelial cell development	0.0818181818181818
GO:0048534	2.7821168390838e-06	1.89420269902408	40.4723601986861	71	868	hematopoietic or lymphoid organ development	0.0817972350230415
GO:0043065	0.00023109027687781	1.86087655810213	25.1320301233777	44	539	positive regulation of apoptotic process	0.0816326530612245
GO:1903531	0.0423370558840217	1.82888114595432	6.85419003364845	12	147	negative regulation of secretion by cell	0.0816326530612245
GO:1901214	0.0042187931006575	1.83938494022267	14.874058644448	26	319	regulation of neuron death	0.0815047021943574
GO:0043069	1.94481540968751e-06	1.88962822232827	42.3374459221279	74	908	negative regulation of programmed cell death	0.0814977973568282
GO:0008406	0.015620755891124	1.83012704174229	10.3045986220157	18	221	gonad development	0.081447963800905
GO:0010810	0.015620755891124	1.83012704174229	10.3045986220157	18	221	regulation of cell-substrate adhesion	0.081447963800905
GO:0030163	1.05132123828828e-06	1.89202401372213	44.6688030764301	78	958	protein catabolic process	0.081419624217119
GO:0050678	0.00194414293639222	1.84085510688836	17.7649415157827	31	381	regulation of epithelial cell proliferation	0.0813648293963255
GO:0043066	2.9812459916476e-06	1.88123567898849	41.3116487742349	72	886	negative regulation of apoptotic process	0.0812641083521445
GO:0009416	0.0043951506990563	1.8330241187384	14.920685787534	26	320	response to light stimulus	0.08125
GO:0002521	0.000260760825262154	1.84934672344384	25.2719115526358	44	542	leukocyte differentiation	0.0811808118081181
GO:2001056	0.0442091464250697	1.81533101045296	6.9008171767345	12	148	positive regulation of cysteine-type endopeptidase activity	0.0810810810810811
GO:0022409	0.00737679856729418	1.82351588911427	13.2421086364365	23	284	positive regulation of cell-cell adhesion	0.0809859154929577
GO:0007623	0.019445630072406	1.81691564573144	9.79170004806922	17	210	circadian rhythm	0.080952380952381
GO:0007159	0.00250015482639544	1.82726124753447	17.2986700849223	30	371	leukocyte cell-cell adhesion	0.0808625336927224
GO:2000116	0.0142302451493503	1.81632188394483	10.9573786252203	19	235	regulation of cysteine-type endopeptidase activity	0.0808510638297872
GO:0071900	0.00296626997037912	1.82421370099095	16.7391443678898	29	359	regulation of protein serine/threonine kinase activity	0.0807799442896936
GO:0002683	0.00120221478627144	1.8267177490265	20.2361800993431	35	434	negative regulation of immune system process	0.0806451612903226
GO:0071706	0.0278143364937987	1.80744693902589	8.67264861400417	15	186	tumor necrosis factor superfamily cytokine production	0.0806451612903226
GO:1903555	0.0278143364937987	1.80744693902589	8.67264861400417	15	186	regulation of tumor necrosis factor superfamily cytokine production	0.0806451612903226
GO:0050807	0.0202675522400004	1.80744773099528	9.83832719115526	17	211	regulation of synapse organization	0.0805687203791469
GO:0007005	0.000488772885911134	1.83026688856016	23.7332158307963	41	509	mitochondrion organization	0.0805500982318271
GO:0009259	0.00228302575763895	1.81963847175812	17.9514500881269	31	385	ribonucleotide metabolic process	0.0805194805194805
GO:0042098	0.024225390381218	1.80239876044915	9.27880147412274	16	199	T cell proliferation	0.0804020100502513
GO:2001234	0.0176849133658211	1.80316811446091	10.4444800512738	18	224	negative regulation of apoptotic signaling pathway	0.0803571428571429
GO:0010035	0.000254607437836781	1.82480488072991	26.7639801313892	46	574	response to inorganic substance	0.0801393728222996
GO:0002520	3.80901493317237e-06	1.85002992871524	43.1301073545906	74	925	immune system development	0.08
GO:0045787	0.00638096901192969	1.7977348663522	14.5942957859317	25	313	positive regulation of cell cycle	0.0798722044728434
GO:0070925	8.67394107926526e-06	1.84110109828217	40.2858516263419	69	864	organelle assembly	0.0798611111111111
GO:0051259	0.0160746822860259	1.79113599178724	11.0972600544784	19	238	protein complex oligomerization	0.0798319327731092
GO:0030308	0.0302059621655613	1.78634948866163	8.76590290017625	15	188	negative regulation of cell growth	0.0797872340425532
GO:0009117	0.000801878287534157	1.80815347721823	22.8006729690755	39	489	nucleotide metabolic process	0.0797546012269939
GO:0009894	3.14554319852235e-06	1.84550101649716	44.4356673609998	76	953	regulation of catabolic process	0.0797481636935992
GO:0000082	0.0228932156261289	1.77962071255752	9.9782086204134	17	214	G1/S transition of mitotic cell cycle	0.0794392523364486
GO:0018105	0.00690104083878594	1.78513337670787	14.6875500721038	25	315	peptidyl-serine phosphorylation	0.0793650793650794
GO:0045137	0.0199543343109709	1.77698312767565	10.584361480532	18	227	development of primary sexual characteristics	0.079295154185022
GO:0046777	0.0199543343109709	1.77698312767565	10.584361480532	18	227	protein autophosphorylation	0.079295154185022
GO:0010942	0.000208226631052351	1.80603212926783	28.8155744271751	49	618	positive regulation of cell death	0.0792880258899676
GO:0007162	0.00819884081308984	1.78031080208215	14.1280243550713	24	303	negative regulation of cell adhesion	0.0792079207920792
GO:0031669	0.0238234007217114	1.77053242707448	10.0248357634994	17	215	cellular response to nutrient levels	0.0790697674418605
GO:0097190	0.000345822578217175	1.79673879694634	27.1369972760776	46	582	apoptotic signaling pathway	0.0790378006872852
GO:0030162	5.57259336000955e-05	1.80530662606134	34.8771030283608	59	748	regulation of proteolysis	0.0788770053475936
GO:0002263	0.0115884051003202	1.76970101551391	13.0089729210062	22	279	cell activation involved in immune response	0.0788530465949821
GO:0080135	0.00015710362951251	1.79615680492339	30.773914436789	52	660	regulation of cellular response to stress	0.0787878787878788
GO:0046661	0.0452558042267213	1.76005201958384	7.69347860919724	13	165	male sex differentiation	0.0787878787878788
GO:0051726	2.42908788617156e-06	1.82343210586881	47.9793302355392	81	1029	regulation of cell cycle	0.0787172011661808
GO:0060548	3.30640397001517e-06	1.82051194771598	46.8136516583881	79	1004	negative regulation of cell death	0.0786852589641434
GO:0071695	0.0215873682715511	1.75994013469693	10.6776157667041	18	229	anatomical structure maturation	0.0786026200873362
GO:0006753	0.00108596480033243	1.77575319656938	23.1736901137638	39	497	nucleoside phosphate metabolic process	0.0784708249496982
GO:0033554	1.58288344357846e-10	1.88574731822454	86.9129947123858	146	1864	cellular response to stress	0.0783261802575107
GO:0008284	6.42714836280262e-06	1.80434441656211	45.3215830796347	76	972	positive regulation of cell population proliferation	0.0781893004115226
GO:0001666	0.00955588617125752	1.75474784302464	14.3145329274155	24	307	response to hypoxia	0.0781758957654723
GO:1901653	0.00559661404820853	1.75381040061496	16.7391443678898	28	359	cellular response to peptide	0.0779944289693593
GO:0048285	0.00143596229821994	1.75968063872255	22.7540458259894	38	488	organelle fission	0.0778688524590164
GO:0048608	0.00288250566534961	1.75419254658385	19.7699086684826	33	424	reproductive structure development	0.0778301886792453
GO:0045785	0.00252544250083005	1.75441637066459	20.3760615286012	34	437	positive regulation of cell adhesion	0.0778032036613272
GO:0050673	0.00252544250083005	1.75441637066459	20.3760615286012	34	437	epithelial cell proliferation	0.0778032036613272
GO:0070372	0.0102998481518401	1.74223544727543	14.4077872135876	24	309	regulation of ERK1 and ERK2 cascade	0.0776699029126214
GO:0036293	0.00900373878245878	1.74236468458167	15.0139400737061	25	322	response to decreased oxygen levels	0.077639751552795
GO:0000280	0.00271673170261411	1.74555246545711	20.4693158147733	34	439	nuclear division	0.0774487471526196
GO:0051258	0.0122342422547602	1.73571489909833	13.848261496555	23	297	protein polymerization	0.0774410774410774
GO:1901652	0.00140350064806186	1.74831747505222	23.5000801153661	39	504	response to peptide	0.0773809523809524
GO:0031401	1.0962161995133e-05	1.78046372915529	45.2283287934626	75	970	positive regulation of protein modification process	0.077319587628866
GO:0016064	0.03325047742776	1.72612363840745	9.65181861881109	16	207	immunoglobulin mediated immune response	0.0772946859903382
GO:0061458	0.00321586246828765	1.74053662073967	19.9097900977407	33	427	reproductive system development	0.0772833723653396
GO:0007160	0.0251578862135436	1.72680538555692	10.8641243390482	18	233	cell-matrix adhesion	0.0772532188841202
GO:0031668	0.0219121355268679	1.72722817732567	11.4702771991668	19	246	cellular response to extracellular stimulus	0.0772357723577236
GO:0006281	0.00127507948181313	1.74516668592123	24.1528601185707	40	518	DNA repair	0.0772200772200772
GO:0048511	0.0126947318903085	1.72930481283422	13.8948886396411	23	298	rhythmic process	0.0771812080536913
GO:0007265	0.00847384262140659	1.73114871097917	15.7133472199968	26	337	Ras protein signal transduction	0.0771513353115727
GO:0031589	0.00648354388653149	1.73247372604433	16.9256529402339	28	363	cell-substrate adhesion	0.0771349862258953
GO:0051656	0.00514846883606153	1.72894424673784	18.1845858035571	30	390	establishment of organelle localization	0.0769230769230769
GO:0030073	0.0397702684536005	1.71620046620047	9.09229290177856	15	195	insulin secretion	0.0769230769230769
GO:0022411	0.0031368553958338	1.72808472072062	20.6558243871174	34	443	cellular component disassembly	0.0767494356659142
GO:0051301	0.000583572853243863	1.73758331265668	28.5824387117449	47	613	cell division	0.0766721044045677
GO:1902905	0.0358480946342946	1.70804287761259	9.74507290498318	16	209	positive regulation of supramolecular fiber organization	0.076555023923445
GO:0002682	1.55612090514842e-07	1.79395516891287	66.3970517545265	109	1424	regulation of immune system process	0.0765449438202247
GO:0006913	0.0141599348182967	1.71035124841303	14.0347700688992	23	301	nucleocytoplasmic transport	0.0764119601328904
GO:0051169	0.0141599348182967	1.71035124841303	14.0347700688992	23	301	nuclear transport	0.0764119601328904
GO:0046651	0.0162216431747992	1.70894922382337	13.4286172087806	22	288	lymphocyte proliferation	0.0763888888888889
GO:0051347	0.00121083038758301	1.72537593450638	25.6449286973241	42	550	positive regulation of transferase activity	0.0763636363636364
GO:0002366	0.0185938700108379	1.70749695020517	12.8224643486621	21	275	leukocyte activation involved in immune response	0.0763636363636364
GO:0042981	1.21559636765082e-07	1.79019222494854	68.4486460503124	112	1468	regulation of apoptotic process	0.0762942779291553
GO:0002274	0.0323247721992248	1.70100263134017	10.3978529081878	17	223	myeloid leukocyte activation	0.0762331838565022
GO:0050867	0.00454792326353308	1.71244345832771	19.5834000961384	32	420	positive regulation of cell activation	0.0761904761904762
GO:0019724	0.0372008752167183	1.69914229691203	9.79170004806922	16	210	B cell mediated immunity	0.0761904761904762
GO:0007010	2.37268718852368e-07	1.78102032575044	66.1639160390963	108	1419	cytoskeleton organization	0.0761099365750529
GO:0055086	0.00113747960696406	1.71976180584407	26.3443358436148	43	565	nucleobase-containing small molecule metabolic process	0.0761061946902655
GO:0050863	0.011602403764656	1.70156560327706	15.3403300753084	25	329	regulation of T cell activation	0.0759878419452888
GO:0043067	1.17018174014295e-07	1.78277113000162	69.9873417721519	114	1501	regulation of programmed cell death	0.0759493670886076
GO:0031334	0.0291580672901376	1.69488103821197	11.0506329113924	18	237	positive regulation of protein-containing complex assembly	0.0759493670886076
GO:0050900	0.00803051857197498	1.70140727758594	17.2054157987502	28	369	leukocyte migration	0.0758807588075881
GO:0051223	0.00199683939123005	1.71052631578947	23.9663515462266	39	514	regulation of protein transport	0.075875486381323
GO:0045859	0.000651876602749248	1.71710955710956	29.5149815734658	48	633	regulation of protein kinase activity	0.0758293838862559
GO:0002696	0.00557081131936092	1.70176827659013	19.070501522192	31	409	positive regulation of leukocyte activation	0.0757946210268949
GO:0031099	0.044470041273306	1.68777943368107	9.23217433103669	15	198	regeneration	0.0757575757575758
GO:0051129	0.000411501990494066	1.71709169727718	32.0328473001122	52	687	negative regulation of cellular component organization	0.0756914119359534
GO:0032943	0.0180547972770706	1.68960199896033	13.5684986380388	22	291	mononuclear cell proliferation	0.0756013745704467
GO:0002684	5.82840452624496e-05	1.72781892021022	41.9644287774395	68	900	positive regulation of immune system process	0.0755555555555556
GO:0070661	0.014248908969979	1.68803634528016	14.827431501362	24	318	leukocyte proliferation	0.0754716981132075
GO:0006310	0.0163194748214071	1.6857071339174	14.2212786412434	23	305	DNA recombination	0.0754098360655738
GO:0051247	3.10906859106999e-07	1.76063941762473	68.1222560487101	110	1461	positive regulation of protein metabolic process	0.0752908966461328
GO:0022402	5.50329558454298e-06	1.73726879922766	54.5537574106714	88	1170	cell cycle process	0.0752136752136752
GO:0051052	0.010190407452983	1.68399128428608	16.7391443678898	27	359	regulation of DNA metabolic process	0.0752089136490251
GO:1903131	0.005594493881783	1.68578619844637	19.8631629546547	32	426	mononuclear cell differentiation	0.0751173708920188
GO:0043434	0.00661110149276389	1.67907133953102	19.3036372376222	31	414	response to peptide hormone	0.0748792270531401
GO:0006914	0.00261780045912547	1.68142008132624	24.3393686909149	39	522	autophagy	0.0747126436781609
GO:0061919	0.00261780045912547	1.68142008132624	24.3393686909149	39	522	process utilizing autophagic mechanism	0.0747126436781609
GO:0018108	0.00986972361345044	1.67141517316645	17.4851786572665	28	375	peptidyl-tyrosine phosphorylation	0.0746666666666667
GO:0051054	0.0495496181375749	1.66027520866231	9.37205576029482	15	201	positive regulation of DNA metabolic process	0.0746268656716418
GO:0051251	0.0112865852186862	1.66862496030486	16.8790257971479	27	362	positive regulation of lymphocyte activation	0.074585635359116
GO:0008285	0.000287257589467043	1.69314928425358	36.2759173209422	58	778	negative regulation of cell population proliferation	0.0745501285347044
GO:0051130	2.68717306332581e-05	1.70923535253227	48.818618811088	78	1047	positive regulation of cellular component organization	0.0744985673352436
GO:0051051	0.0044426882796201	1.67208460209036	21.9147572504406	35	470	negative regulation of transport	0.074468085106383
GO:0032270	1.6172182112769e-06	1.72567328033014	64.0190674571383	102	1373	positive regulation of cellular protein metabolic process	0.0742898761835397
GO:0033157	0.0400359927139772	1.65229897725269	10.6776157667041	17	229	regulation of intracellular protein transport	0.074235807860262
GO:0034976	0.0313459923383328	1.65341060682418	11.9365486300272	19	256	response to endoplasmic reticulum stress	0.07421875
GO:0070201	0.00261736404228968	1.66970194891584	25.1320301233777	40	539	regulation of establishment of protein localization	0.0742115027829314
GO:1901565	3.21903265404487e-06	1.71748554913295	60.9883031565454	97	1308	organonitrogen compound catabolic process	0.0741590214067278
GO:0007049	7.0678921372235e-08	1.74616517874007	80.5250761095978	128	1727	cell cycle	0.0741169658367111
GO:0018212	0.0109108641436444	1.65680473372781	17.6250600865246	28	378	peptidyl-tyrosine modification	0.0740740740740741
GO:0018209	0.0157989180633533	1.65179109650974	15.7599743630828	25	338	peptidyl-serine modification	0.0739644970414201
GO:0042110	0.00443798662049807	1.65929952554658	22.7074186829034	36	487	T cell activation	0.0739219712525667
GO:0045333	0.0414402665133628	1.64444846649993	10.7242429097901	17	230	cellular respiration	0.0739130434782609
GO:0070374	0.0477211726753774	1.63931799578537	10.1180900496715	16	217	positive regulation of ERK1 and ERK2 cascade	0.0737327188940092
GO:0042127	1.01337654404402e-07	1.73306098628538	81.0379746835443	128	1738	regulation of cell population proliferation	0.0736478711162255
GO:0031348	0.0335497142209499	1.63938835703017	12.0298029161993	19	258	negative regulation of defense response	0.0736434108527132
GO:0044265	2.71366566954459e-05	1.68592996158426	52.035891684025	82	1116	cellular macromolecule catabolic process	0.0734767025089606
GO:0010941	3.81720600826397e-07	1.71209897253093	76.468514661112	120	1640	regulation of cell death	0.0731707317073171
GO:0042886	0.025357121989028	1.62811619473611	14.0347700688992	22	301	amide transport	0.0730897009966777
GO:0006915	4.38367853693453e-08	1.72581840356308	88.7780804358276	139	1904	apoptotic process	0.0730042016806723
GO:0032271	0.045865460357161	1.62133307372793	10.8641243390482	17	233	regulation of protein polymerization	0.0729613733905579
GO:0060322	0.00049399767065757	1.65245273909316	37.0685787534049	58	795	head development	0.0729559748427673
GO:0043410	0.00613692708450675	1.63357110294709	22.3810286813011	35	480	positive regulation of MAPK cascade	0.0729166666666667
GO:0001819	0.00700308428091495	1.63005557589454	21.7748758211825	34	467	positive regulation of cytokine production	0.0728051391862955
GO:0033674	0.00700308428091495	1.63005557589454	21.7748758211825	34	467	positive regulation of kinase activity	0.0728051391862955
GO:1901701	1.99826150566429e-05	1.67133757961783	56.4188431341131	88	1210	cellular response to oxygen-containing compound	0.0727272727272727
GO:0042326	0.0136900121839889	1.62366863905325	17.9514500881269	28	385	negative regulation of phosphorylation	0.0727272727272727
GO:0070371	0.0212950835184293	1.62073027090695	15.3869572183945	24	330	ERK1 and ERK2 cascade	0.0727272727272727
GO:0045936	0.00912317107703223	1.62256482415567	20.5625701009454	32	441	negative regulation of phosphate metabolic process	0.072562358276644
GO:0071417	0.00203884343682076	1.63292451200553	29.5616087165518	46	634	cellular response to organonitrogen compound	0.0725552050473186
GO:0006259	0.000267877545695428	1.64753636916038	41.7779202050953	65	896	DNA metabolic process	0.0725446428571429
GO:0051276	0.000373762372224761	1.64437284936163	39.8662073385675	62	855	chromosome organization	0.0725146198830409
GO:0012501	4.72157246208881e-08	1.71407899402738	91.34257330556	142	1959	programmed cell death	0.0724859622256253
GO:0007548	0.0344566530127952	1.61140826494724	12.8690914917481	20	276	sex differentiation	0.072463768115942
GO:0071375	0.0310183894424891	1.61090894811247	13.5218714949527	21	290	cellular response to peptide hormone stimulus	0.0724137931034483
GO:0010563	0.00941226385121209	1.61851454424176	20.6091972440314	32	442	negative regulation of phosphorus metabolic process	0.0723981900452489
GO:0018193	1.75941600716935e-05	1.66355794581161	58.6569460022432	91	1258	peptidyl-amino acid modification	0.0723370429252782
GO:0016567	0.000612427377579622	1.63623589946566	37.3949687550072	58	802	protein ubiquitination	0.0723192019950125
GO:0043122	0.0440088412651927	1.60574162679426	11.6101586284249	18	249	regulation of I-kappaB kinase/NF-kappaB signaling	0.072289156626506
GO:0045926	0.0440088412651927	1.60574162679426	11.6101586284249	18	249	negative regulation of growth	0.072289156626506
GO:0032446	0.000409469453394496	1.63788734052507	40.0060887678257	62	858	protein modification by small protein conjugation	0.0722610722610723
GO:0030098	0.0166647618798984	1.60981666564474	17.4385515141804	27	374	lymphocyte differentiation	0.072192513368984
GO:0080134	1.4098154133284e-05	1.66090011690244	60.7551674411152	94	1303	regulation of response to stress	0.0721412125863392
GO:0045597	0.000448222778740335	1.63145053388252	40.1459701970838	62	861	positive regulation of cell differentiation	0.0720092915214866
GO:0032868	0.0408495546915854	1.59869521579123	12.3095657747156	19	264	response to insulin	0.071969696969697
GO:0050730	0.0408495546915854	1.59869521579123	12.3095657747156	19	264	regulation of peptidyl-tyrosine phosphorylation	0.071969696969697
GO:0010975	0.0103251267654622	1.60648138817792	20.7490786732895	32	445	regulation of neuron projection development	0.0719101123595506
GO:0016042	0.0268149205720402	1.59920380273321	14.920685787534	23	320	lipid catabolic process	0.071875
GO:0007420	0.00109655178067972	1.62020214742278	35.063611600705	54	752	brain development	0.0718085106382979
GO:0007169	0.00278747827605494	1.61250560286867	29.2352187149495	45	627	transmembrane receptor protein tyrosine kinase signaling pathway	0.0717703349282297
GO:0009057	1.7404230348642e-05	1.65064438213634	61.0815574427175	94	1310	macromolecule catabolic process	0.0717557251908397
GO:0031667	0.00869196624049349	1.60347816664861	22.1012658227848	34	474	response to nutrient levels	0.0717299578059072
GO:0007264	0.00710132102007015	1.60450413032443	23.406825829194	36	502	small GTPase mediated signal transduction	0.0717131474103586
GO:0044248	2.0601447186279e-08	1.70410873918999	100.807883352027	155	2162	cellular catabolic process	0.0716928769657724
GO:0001934	0.00142265247404106	1.61406983594589	33.8513058804679	52	726	positive regulation of protein phosphorylation	0.0716253443526171
GO:0031399	5.29027284703312e-06	1.65284193613175	69.8474603428938	107	1498	regulation of protein modification process	0.0714285714285714
GO:0032102	0.0138644818653097	1.59321105940323	19.5834000961384	30	420	negative regulation of response to external stimulus	0.0714285714285714
GO:0009991	0.00776938700391114	1.593965655593	23.5467072584522	36	505	response to extracellular stimulus	0.0712871287128713
GO:0010243	0.000161174707343824	1.62138475021911	49.0983816696042	75	1053	response to organonitrogen compound	0.0712250712250712
GO:0045861	0.0238949388553817	1.58474649843732	16.3661272232014	25	351	negative regulation of proteolysis	0.0712250712250712
GO:0060271	0.0265106553935483	1.58385170299958	15.7133472199968	24	337	cilium assembly	0.0712166172106825
GO:0022604	0.0326767174411612	1.58201255338053	14.4077872135876	22	309	regulation of cell morphogenesis	0.0711974110032362
GO:0097305	0.0499932030082391	1.57805151175812	11.7966672007691	18	253	response to alcohol	0.0711462450592885
GO:0051640	0.00745069859892371	1.5879977460556	24.2927415478289	37	521	organelle localization	0.0710172744721689
GO:0043408	0.00253581267275271	1.5955529820498	31.5199487261657	48	676	regulation of MAPK cascade	0.0710059171597633
GO:0050708	0.0463183712093036	1.57265596343218	12.4960743470598	19	268	regulation of protein secretion	0.0708955223880597
GO:0019637	0.000464678807283687	1.60395614584854	43.4564973561929	66	932	organophosphate metabolic process	0.0708154506437768
GO:0044782	0.0235778396408274	1.57144928436794	17.1587886556642	26	368	cilium organization	0.0706521739130435
GO:0008219	1.04139414483156e-07	1.6684589581689	98.3366447684666	149	2109	cell death	0.0706495969653864
GO:0042327	0.00118533547302991	1.59264705882353	37.6281044704374	57	807	positive regulation of phosphorylation	0.0706319702602231
GO:1902532	0.00735143402461541	1.57916167664671	25.0854029802916	38	538	negative regulation of intracellular signal transduction	0.0706319702602231
GO:0051338	0.00086290777873999	1.59065110301992	40.379105912514	61	866	regulation of transferase activity	0.0704387990762125
GO:0042254	0.0409964110842692	1.55795926638971	13.9415157827271	21	299	ribosome biogenesis	0.0702341137123746
GO:0002460	0.0277499071289865	1.56036239525737	16.5992629386316	25	356	adaptive immune response based on somatic recombination of immune receptors built from immunoglobulin superfamily domains	0.0702247191011236
GO:0008283	3.63140358688367e-07	1.64801927194861	93.6739304598622	141	2009	cell population proliferation	0.0701841712294674
GO:0001933	0.0307990613875078	1.55850390026002	15.946482935427	24	342	negative regulation of protein phosphorylation	0.0701754385964912
GO:0120035	0.00476693257067693	1.56919543268834	29.2818458580356	44	628	regulation of plasma membrane bounded cell projection organization	0.0700636942675159
GO:0030031	0.0084832298984541	1.56307582854094	25.3185386957218	38	543	cell projection assembly	0.0699815837937385
GO:1901137	0.00542176601191461	1.5649043727357	28.675692997917	43	615	carbohydrate derivative biosynthetic process	0.0699186991869919
GO:0010562	0.000949365808672451	1.57762582670104	41.3582759173209	62	887	positive regulation of phosphorus metabolic process	0.0698985343855693
GO:0045937	0.000949365808672451	1.57762582670104	41.3582759173209	62	887	positive regulation of phosphate metabolic process	0.0698985343855693
GO:0051128	9.73817992479802e-08	1.65078660712617	104.911071943599	157	2250	regulation of cellular component organization	0.0697777777777778
GO:0031400	0.010682907551782	1.55645161290323	24.0596058323987	36	516	negative regulation of protein modification process	0.0697674418604651
GO:0010038	0.0272918200817888	1.54836360914433	17.3919243710944	26	373	response to metal ion	0.0697050938337802
GO:1901699	0.00366708617209726	1.56201389873777	32.1261015862842	48	689	cellular response to nitrogen compound	0.06966618287373
GO:0031344	0.00482112503016077	1.5598097373942	30.1211344335844	45	646	regulation of cell projection organization	0.0696594427244582
GO:0009306	0.0302814556765188	1.54608236357474	16.7391443678898	25	359	protein secretion	0.0696378830083565
GO:0051056	0.0447942527099672	1.54106310460629	14.0813972119853	21	302	regulation of small GTPase mediated signal transduction	0.0695364238410596
GO:1901698	0.000236075316098858	1.57914986215139	53.0150616888319	79	1137	response to nitrogen compound	0.06948109058927
GO:0035592	0.0311632061776647	1.54137918896086	16.7857715109758	25	360	establishment of protein localization to extracellular region	0.0694444444444444
GO:0030155	0.00274018059616163	1.55871780398681	34.9237301714469	52	749	regulation of cell adhesion	0.0694259012016021
GO:0002694	0.00670144385240183	1.55188488691961	28.2094215670566	42	605	regulation of leukocyte activation	0.0694214876033058
GO:0050865	0.00523678899528053	1.55179239850274	30.2610158628425	45	649	regulation of cell activation	0.0693374422187981
GO:0016570	0.0174433791809949	1.53780026540054	21.5883672488383	32	463	histone modification	0.0691144708423326
GO:0043549	0.003137871954827	1.54716470429016	35.1568658868771	52	754	regulation of kinase activity	0.0689655172413793
GO:0032787	0.00826671472049771	1.53849625104138	27.7431501361961	41	595	monocarboxylic acid metabolic process	0.0689075630252101
GO:0062012	0.0406672187190469	1.52599583885001	15.5734657907387	23	334	regulation of small molecule metabolic process	0.0688622754491018
GO:0042592	6.6922218714107e-06	1.59103597122302	83.5092132671046	123	1791	homeostatic process	0.0686767169179229
GO:1901575	1.38734708225712e-06	1.60430527447849	95.0727447524435	140	2039	organic substance catabolic process	0.068661108386464
GO:0002449	0.0387270312622721	1.51956469899629	16.3195000801154	24	350	lymphocyte mediated immunity	0.0685714285714286
GO:0006468	3.44099067911956e-05	1.57372424444491	72.1321903541099	106	1547	protein phosphorylation	0.0685197155785391
GO:0019725	0.00143348528620751	1.54221444314793	42.8969716391604	63	920	cellular homeostasis	0.0684782608695652
GO:1902531	1.44779003798204e-05	1.58014174422751	78.9863803877584	116	1694	regulation of intracellular signal transduction	0.0684769775678867
GO:0032101	0.00123615971159801	1.54210018459473	44.2957859317417	65	950	regulation of response to external stimulus	0.068421052631579
GO:0071407	0.0104496628813143	1.52183950503278	27.3235058484217	40	586	cellular response to organic cyclic compound	0.068259385665529
GO:0001701	0.0378907190643945	1.50922707712678	17.1121615125781	25	367	in utero embryonic development	0.0681198910081744
GO:0120031	0.0152281271506698	1.51427512050426	24.6657586925172	36	529	plasma membrane bounded cell projection assembly	0.0680529300567108
GO:0009967	7.3167963463252e-05	1.55530667215353	69.2879346258612	101	1486	positive regulation of signal transduction	0.0679676985195155
GO:0043085	0.00054573664632296	1.53839510050251	52.8285531164877	77	1133	positive regulation of catalytic activity	0.0679611650485437
GO:0071692	0.0389339318503688	1.50474104736234	17.1587886556642	25	368	protein localization to extracellular region	0.0679347826086956
GO:0070887	3.66607915483605e-09	1.6434751911313	142.772312129466	208	3062	cellular response to chemical stimulus	0.0679294578706728
GO:0051345	0.0113058613496012	1.51326104212177	27.4633872776799	40	589	positive regulation of hydrolase activity	0.067911714770798
GO:0009056	2.36077711958208e-07	1.59821611384111	116.56785771511	169	2500	catabolic process	0.0676
GO:0005975	0.0122190554942545	1.50477582337283	27.603268706938	40	592	carbohydrate metabolic process	0.0675675675675676
GO:0016310	1.54583831813375e-05	1558	85.001281845858	123	1823	phosphorylation	0.0674712013165112
GO:0010638	0.0201605130574383	1.49854183044658	23.5000801153661	34	504	positive regulation of organelle organization	0.0674603174603175
GO:0044087	0.00190634873399297	1.51649871152919	44.2491587886557	64	949	regulation of cellular component biogenesis	0.0674394099051633
GO:0090407	0.0160945873709117	1.49873373953349	25.5983015542381	37	549	organophosphate biosynthetic process	0.0673952641165756
GO:0007417	0.00131305351766587	1.51826599984371	47.746194520109	69	1024	central nervous system development	0.0673828125
GO:0050727	0.0390509948970619	1.49134199134199	17.9980772312129	26	386	regulation of inflammatory response	0.0673575129533679
GO:0006091	0.0223085256160969	1.49517818068146	22.8473001121615	33	490	generation of precursor metabolites and energy	0.0673469387755102
GO:0001932	0.000903049265395123	1.52025397600659	51.2432302515623	74	1099	regulation of protein phosphorylation	0.0673339399454049
GO:1901135	0.00141500411375233	1.51324276321939	47.8860759493671	69	1027	carbohydrate derivative metabolic process	0.0671859785783836
GO:0052548	0.0318335225310723	1.4875489515835	20.142925813171	29	432	regulation of endopeptidase activity	0.0671296296296296
GO:1902533	0.00200427853119867	1.50799800665907	45.1817016503765	65	969	positive regulation of intracellular signal transduction	0.0670794633642931
GO:0009628	0.000796010141000714	1.51549413735343	53.5279602627784	77	1148	response to abiotic stimulus	0.0670731707317073
GO:0051094	0.000346101353355565	1.5213830755232	61.2214388719756	88	1313	positive regulation of developmental process	0.067022086824067
GO:0051246	3.30689868569394e-07	1.58257580989714	119.738503444961	172	2568	regulation of protein metabolic process	0.0669781931464174
GO:0019220	0.000273619683592155	1.51664104534973	64.9982374619452	93	1394	regulation of phosphate metabolic process	0.0667144906743185
GO:0051174	0.000273619683592155	1.51664104534973	64.9982374619452	93	1394	regulation of phosphorus metabolic process	0.0667144906743185
GO:0048732	0.0352615612158449	1.47259161358687	20.3294343855151	29	436	gland development	0.0665137614678899
GO:0007167	0.00268983506725928	1.49165052228063	44.9019387918603	64	963	enzyme linked receptor protein signaling pathway	0.0664589823468328
GO:0006464	1.69670420424618e-09	1.62125865345459	166.598782246435	237	3573	cellular protein modification process	0.0663308144416457
GO:0036211	1.69670420424618e-09	1.62125865345459	166.598782246435	237	3573	protein modification process	0.0663308144416457
GO:1901700	7.38050902338421e-05	1.51945730920639	79.4526518186188	113	1704	response to oxygen-containing compound	0.0663145539906103
GO:0032268	1.95176209999807e-06	1.55186449579832	111.858516263419	159	2399	regulation of cellular protein metabolic process	0.0662776156731972
GO:0006996	1.58603183802275e-09	1.62034012095811	168.230732254446	239	3608	organelle organization	0.0662416851441242
GO:0051249	0.0259403807617222	1.46647794994041	23.9663515462266	34	514	regulation of lymphocyte activation	0.066147859922179
GO:0035556	7.0526503372246e-07	1.5565778941182	122.862522031726	174	2635	intracellular signal transduction	0.066034155597723
GO:0031347	0.0164539779662349	1.46470980074143	29.0020829995193	41	622	regulation of defense response	0.0659163987138264
GO:0000165	0.00837004031755706	1.46762713231439	36.136035891684	51	775	MAPK cascade	0.0658064516129032
GO:0006793	5.46910774458277e-07	1.55417352600451	127.571863483416	180	2736	phosphorus metabolic process	0.0657894736842105
GO:0042325	0.000993088629485357	1.48333416458312	58.1906745713828	82	1248	regulation of phosphorylation	0.0657051282051282
GO:0002252	0.0152107592497991	1.45923694779116	30.5407787213588	43	655	immune effector process	0.0656488549618321
GO:0006796	8.1110543831649e-07	1.5458772753181	126.592693478609	178	2715	phosphate-containing compound metabolic process	0.0655616942909761
GO:0065003	0.000246188046666867	1.49164375447561	73.297868931261	103	1572	protein-containing complex assembly	0.0655216284987277
GO:0040007	0.00457179130503524	1.46619670460336	43.4098702131069	61	931	growth	0.0655209452201933
GO:0033043	0.00215533448961327	1.47242431867663	51.2432302515623	72	1099	regulation of organelle organization	0.0655141037306642
GO:0044089	0.0292790486640007	1.45094184289102	24.1994872616568	34	519	positive regulation of cellular component biogenesis	0.0655105973025048
GO:0070647	0.00355340244571769	1.46691756998976	46.3007530844416	65	993	protein modification by small protein conjugation or removal	0.0654582074521652
GO:0043254	0.0452958607715369	1.44556213017751	19.9564172408268	28	428	regulation of protein-containing complex assembly	0.0654205607476635
GO:0044281	0.000120185092627283	1.49561432242191	81.2711103989745	114	1743	small molecule metabolic process	0.0654044750430293
GO:0014070	0.00444375385927647	1.46374484027467	44.2025316455696	62	948	response to organic cyclic compound	0.0654008438818565
GO:0040008	0.0163201926660279	1.45186600058772	30.6806601506169	43	658	regulation of growth	0.0653495440729483
GO:0030029	0.00935494529252506	1.45217530442506	37.208460182663	52	798	actin filament-based process	0.0651629072681704
GO:0052547	0.0417027731185924	1.43826737455722	21.4951129626662	30	461	regulation of peptidase activity	0.0650759219088937
GO:0044093	0.000501703396684321	1.47331661891117	69.6143246274635	97	1493	positive regulation of molecular function	0.0649698593436035
GO:0098609	0.00670610391689364	1.4501598030932	41.6380387758372	58	893	cell-cell adhesion	0.06494960806271
GO:0043412	5.49898478245352e-09	1.58432761142329	176.67024515302	246	3789	macromolecule modification	0.0649247822644497
GO:0055082	0.00882802598089572	1.44682053165344	38.7937830475885	54	832	cellular chemical homeostasis	0.0649038461538462
GO:0097435	0.0131904341496836	1.44260641093011	34.5040858836725	48	740	supramolecular fiber organization	0.0648648648648649
GO:0034622	0.00328362975933454	1.45193654359948	50.4039416760135	70	1081	cellular protein-containing complex assembly	0.0647548566142461
GO:0030036	0.0160199391658984	1.43516672658148	33.1985258772633	46	712	actin cytoskeleton organization	0.0646067415730337
GO:0051270	0.00315930146706181	1.44698437298205	52.035891684025	72	1116	regulation of cellular component movement	0.0645161290322581
GO:0003006	0.00524650487192162	1.44256425557308	46.2541259413556	64	992	developmental process involved in reproduction	0.0645161290322581
GO:0048584	4.38757092260742e-05	1.48603900899324	99.0360519147573	137	2124	positive regulation of response to stimulus	0.0645009416195857
GO:1901566	0.000275735840154593	1.46823480720149	79.5459061047909	110	1706	organonitrogen compound biosynthetic process	0.0644783118405627
GO:0051240	0.00092661043421035	1.45260765822066	67.4694760455055	93	1447	positive regulation of multicellular organismal process	0.0642709053213545
GO:0048878	0.00288455036484973	1.4353834389338	56.1390802755969	77	1204	chemical homeostasis	0.063953488372093
GO:0000003	0.000915800805733798	1.44501502111744	70.0339689152379	96	1502	reproduction	0.0639147802929427
GO:0022607	3.14098529596599e-06	1.49861660079051	133.680019227688	183	2867	cellular component assembly	0.0638297872340425
GO:0032880	0.0120130456500056	1.42007992007992	39.4465630507931	54	846	regulation of protein localization	0.0638297872340425
GO:0009611	0.0382871068366051	1.40867174948692	25.5983015542381	35	549	response to wounding	0.063752276867031
GO:0023057	0.00180162960109645	1.43287810114504	63.739304598622	87	1367	negative regulation of signaling	0.063643013899049
GO:0044255	0.0074783317227439	1.41988493347717	46.1608716551835	63	990	cellular lipid metabolic process	0.0636363636363636
GO:0010817	0.0470687016031733	1.40397009929035	23.4534529722801	32	503	regulation of hormone levels	0.0636182902584493
GO:0044267	2.765376230128e-10	1.59592872315317	222.085082518827	303	4763	cellular protein metabolic process	0.063615368465253
GO:0043933	0.000413809539228617	1.44498865129614	82.1570261176094	112	1762	protein-containing complex subunit organization	0.0635641316685585
GO:0044085	1.55699212275739e-06	1.49920346913158	145.430059285371	198	3119	cellular component biogenesis	0.0634818852196217
GO:0046649	0.0177732854862985	1.40867844337912	35.9961544624259	49	772	lymphocyte activation	0.0634715025906736
GO:0051336	0.00665611054112735	1.41703625107822	48.4922288094857	66	1040	regulation of hydrolase activity	0.0634615384615385
GO:0000904	0.0241775848356097	1.4044724877053	32.3592373017145	44	694	cell morphogenesis involved in differentiation	0.0634005763688761
GO:0006508	0.000485771964564833	1.43981659304782	81.6441275436629	111	1751	proteolysis	0.0633923472301542
GO:0022414	0.00127106409244507	1.43033309164415	69.8940874859798	95	1499	reproductive process	0.0633755837224817
GO:0043604	0.0127976565211653	1.40555367123328	41.3116487742349	56	886	amide biosynthetic process	0.0632054176072235
GO:0032870	0.0383062896536086	1.39474337856564	27.3235058484217	37	586	cellular response to hormone stimulus	0.0631399317406143
GO:0010648	0.00243785940630195	1.41818847580943	63.5527960262778	86	1363	negative regulation of cell communication	0.0630961115187087
GO:0030030	0.00139034133220409	1.42301548192151	70.9665117769588	96	1522	cell projection organization	0.0630749014454665
GO:0031325	2.11572078239788e-06	1.48828472160053	147.854670725845	200	3171	positive regulation of cellular metabolic process	0.0630715862503942
GO:0034097	0.0122462513698752	1.40080046065587	42.9435987822464	58	921	response to cytokine	0.0629750271444083
GO:0120036	0.00177520179559717	1.41742571507914	68.9149174811729	93	1478	plasma membrane bounded cell projection organization	0.0629228687415426
GO:0071310	5.67585696986584e-05	1.45059749611926	112.697804838968	152	2417	cellular response to organic substance	0.0628878775341332
GO:0001775	0.0077538734117266	1.40216767636122	49.7045345297228	67	1066	cell activation	0.0628517823639775
GO:0050776	0.0141846474936383	1.39672674235373	41.5447844896651	56	891	regulation of immune response	0.0628507295173962
GO:0040012	0.00735266398342818	1.40253592561285	50.4505688190995	68	1082	regulation of locomotion	0.0628465804066543
GO:0000902	0.010528585814733	1.39721379626251	46.0676173690114	62	988	cell morphogenesis	0.062753036437247
GO:0009968	0.00443128797778728	1.4017781288659	58.8434545745874	79	1262	negative regulation of signal transduction	0.0625990491283677
GO:0071345	0.0200688704633295	1.38753964917644	38.0011216151258	51	815	cellular response to cytokine stimulus	0.0625766871165644
GO:0060429	0.00770788585435884	1.39571003781864	51.4297388239064	69	1103	epithelium development	0.0625566636446056
GO:0010647	0.00114837504090513	1.4117772446066	78.3802275276398	105	1681	positive regulation of cell communication	0.0624628197501487
GO:0045321	0.0143949923467201	1.38728068012932	43.3166159269348	58	929	leukocyte activation	0.0624327233584499
GO:0048589	0.0406088895009693	1.37523439510742	29.1885915718635	39	626	developmental growth	0.0623003194888179
GO:0023056	0.00129227419257913	1.40590431415929	78.6599903861561	105	1687	positive regulation of signaling	0.0622406639004149
GO:0016043	8.04946387289843e-12	1.62087522529833	278.830315654543	372	5980	cellular component organization	0.0622073578595318
GO:0048585	0.00161525346960334	1.40113194198797	76.5617689472841	102	1642	negative regulation of response to stimulus	0.0621193666260658
GO:0022610	0.00268891355621012	1.39447423131634	69.8940874859798	93	1499	biological adhesion	0.0620413609072715
GO:0071840	4.83320687907865e-12	1.62515410856425	288.155744271751	383	6180	cellular component organization or biogenesis	0.0619741100323625
GO:0051173	1.82148605031256e-05	1.44458312596248	138.435987822464	184	2969	positive regulation of nitrogen compound metabolic process	0.0619737285281239
GO:0030334	0.0143588587005533	1.37611957008509	45.9277359397532	61	985	regulation of cell migration	0.0619289340101523
GO:0002376	3.52168114385999e-05	1.43607396231574	131.068899214869	174	2811	immune system process	0.0618996798292423
GO:0009966	2.2809215717811e-05	1.44003649405399	137.177054959141	182	2942	regulation of signal transduction	0.061862678450034
GO:0043043	0.0297325008243018	1.36761255004771	35.4366287453934	47	760	peptide biosynthetic process	0.0618421052631579
GO:0006950	7.29566498306717e-07	1.47742171763413	179.514500881269	238	3850	response to stress	0.0618181818181818
GO:1901564	5.62719452122268e-12	1.6207492795389	293.144848581958	388	6287	organonitrogen compound metabolic process	0.0617146492762844
GO:0007155	0.00337078550244799	1.38412291933419	69.5676974843775	92	1492	cell adhesion	0.0616621983914209
GO:0009725	0.0233030860216748	1.36500589355336	40.0993430539978	53	860	response to hormone	0.0616279069767442
GO:0006928	0.000517855064342976	1.3991576819407	99.3624419163596	131	2131	movement of cell or subcellular component	0.0614734866259972
GO:0009893	2.45516674171428e-06	1.45744283963119	171.448005127383	226	3677	positive regulation of metabolic process	0.0614631493064999
GO:2000145	0.0148058104777691	1.36329419667151	48.6321102387438	64	1043	regulation of cell motility	0.0613614573346117
GO:0032990	0.0469104117787493	1.35254101640656	30.4008972921006	40	652	cell part morphogenesis	0.0613496932515337
GO:0043603	0.00969662628439147	1.36695277529096	55.4863002723922	73	1190	cellular amide metabolic process	0.061344537815126
GO:0006412	0.0379026967139666	1.35160680529301	34.2709501682423	45	735	translation	0.0612244897959184
GO:0009719	0.0031037929128738	1.37531903934067	74.6500560807563	98	1601	response to endogenous stimulus	0.061211742660837
GO:0048468	0.000768084061406921	1.38892083243349	96.7979490466271	127	2076	cell development	0.0611753371868979
GO:0019538	4.62922287591953e-09	1.5264238743364	249.781605511937	327	5357	protein metabolic process	0.0610416277767407
GO:0065008	3.50604536006212e-06	1.4455684534091	174.991668001923	229	3753	regulation of biological quality	0.0610178523847589
GO:0033993	0.0252844695850772	1.3497443876417	42.0576830636116	55	902	response to lipid	0.0609756097560976
GO:0048583	5.59632577593698e-06	1.42855765960345	181.566095177055	235	3894	regulation of response to stimulus	0.0603492552645095
GO:0032269	0.0228270526850692	1.33169768753525	48.865245954174	63	1048	negative regulation of cellular protein metabolic process	0.0601145038167939
GO:0008104	0.000585557184504096	1.36988456095926	114.842653420926	148	2463	protein localization	0.0600893219650832
GO:0006954	0.043280908044819	1.32470160997458	37.2550873257491	48	799	inflammatory response	0.0600750938673342
GO:0051641	0.000234225381742018	1.37876229951575	131.3020349303	169	2816	cellular localization	0.0600142045454545
GO:0051248	0.020498647055049	1.32868023600352	52.1291459701971	67	1118	negative regulation of protein metabolic process	0.0599284436493739
GO:0009888	0.00321946344649073	1.3471765639786	87.1927575709021	112	1870	tissue development	0.0598930481283422
GO:0006518	0.0342821339415948	1.32186396359685	42.8503444960743	55	919	peptide metabolic process	0.0598476605005441
GO:0010604	5.64216972815467e-05	1.39196921334577	157.413235058484	202	3376	positive regulation of macromolecule metabolic process	0.0598341232227488
GO:0043436	0.0336536647448046	1.32022001258723	43.6896330716231	56	937	oxoacid metabolic process	0.0597652081109925
GO:0051649	0.00219670192921014	1.34680016890484	96.8912033327992	124	2078	establishment of localization in cell	0.0596727622714148
GO:0050790	0.00102280143034076	1.35404036723987	111.858516263419	143	2399	regulation of catalytic activity	0.0596081700708629
GO:0071495	0.0142412245085168	1.32264029626824	62.713507450729	80	1345	cellular response to endogenous stimulus	0.0594795539033457
GO:0048522	5.28440371625638e-08	1.47484690595336	262.697324146771	335	5634	positive regulation of cellular process	0.059460418885339
GO:0006082	0.0353566210301112	1.31249184818051	44.7154302195161	57	959	organic acid metabolic process	0.059436913451512
GO:0007166	0.00049040980160825	1.35795463799321	128.784169203653	164	2762	cell surface receptor signaling pathway	0.0593772628530051
GO:0140352	0.0454118109737341	1.30860193683602	40.0527159109117	51	859	export from cell	0.0593713620488941
GO:0006629	0.0160335711103313	1.31677774697793	62.1539817336965	79	1333	lipid metabolic process	0.059264816204051
GO:0019752	0.0421350666388774	1.305771151925	42.523954494472	54	912	carboxylic acid metabolic process	0.0592105263157895
GO:0032879	0.000525687640950242	1.35334041172211	130.789136356353	166	2805	regulation of localization	0.0591800356506239
GO:0048869	1.43241056668617e-05	1.39573408525008	194.94808524275	247	4181	cellular developmental process	0.0590767758909352
GO:0048513	0.000140211620763781	1.36518914766655	158.951930780324	201	3409	animal organ development	0.0589615723085949
GO:0048518	2.94353311967759e-08	1.47631309531699	286.75692997917	362	6150	positive regulation of biological process	0.0588617886178862
GO:0051093	0.0439748505977843	1.29544831199879	44.4356673609998	56	953	negative regulation of developmental process	0.0587618048268625
GO:0006955	0.00513714729603166	1.3162178609463	93.0211504566576	117	1995	immune response	0.0586466165413534
GO:0033036	0.000699556852672016	1.33810429899917	136.151257811248	171	2920	macromolecule localization	0.0585616438356164
GO:0048870	0.010264052506304	1.30491028741774	79.7324146771351	100	1710	cell motility	0.0584795321637427
GO:0051674	0.010264052506304	1.30491028741774	79.7324146771351	100	1710	localization of cell	0.0584795321637427
GO:0044419	0.0139345118775941	1.29507489779067	76.1421246595097	95	1633	biological process involved in interspecies interaction between organisms	0.0581751377832211
GO:0045184	0.0124084405763903	1.29549672330801	79.4060246755328	99	1703	establishment of protein localization	0.0581327069876688
GO:0030154	7.06323857697928e-05	1.3588678067224	191.031405223522	238	4097	cell differentiation	0.0580912863070539
GO:0023051	0.000433209069614441	1.33487675337056	155.781285050473	194	3341	regulation of signaling	0.0580664471715055
GO:0010646	0.000458972345465677	1.33375309894073	155.035250761096	193	3325	regulation of cell communication	0.0580451127819549
GO:0040011	0.00926171418219896	1.29693544138582	87.5657747155905	109	1878	locomotion	0.0580404685835996
GO:0010628	0.0387127886507739	1.28001720024413	53.061688831918	66	1138	positive regulation of gene expression	0.0579964850615114
GO:0048666	0.0416252856753159	1.27869164210326	51.4763659669925	64	1104	neuron development	0.0579710144927536
GO:0045595	0.0182989762345035	1.28650838515169	72.4585803557122	90	1554	regulation of cell differentiation	0.0579150579150579
GO:0065009	0.000872555066885895	1.32310601862115	144.124499278962	179	3091	regulation of molecular function	0.0579100614687803
GO:0015031	0.019149945771873	1.28026670662271	74.4169203653261	92	1596	protein transport	0.0576441102756892
GO:0035295	0.0476449577253303	1.26704224754637	51.8960102547669	64	1113	tube development	0.0575022461814915
GO:0010033	0.00137792878189661	1.3083194848359	143.704854991187	177	3082	response to organic substance	0.0574302401038287
GO:0034613	0.0181640991562339	1.27279212441147	80.6183303957699	99	1729	cellular protein localization	0.0572585309427415
GO:0048523	3.1563618747787e-05	1.35687771350621	229.685306841852	282	4926	negative regulation of cellular process	0.0572472594397077
GO:0016477	0.0284474775473579	1.26232434525673	71.153020349303	87	1526	cell migration	0.0570117955439056
GO:0070727	0.0217816406037984	1.26170929524834	81.2244832558885	99	1742	cellular macromolecule localization	0.0568312284730195
GO:0051179	4.40740846412651e-06	1.37782160006772	290.253965710623	352	6225	localization	0.0565461847389558
GO:2000026	0.0444908209404875	1.24492418103947	64.4387117449127	78	1382	regulation of multicellular organismal development	0.0564399421128799
GO:0051239	0.00610313343235553	1.26825903669361	127.431982054158	154	2733	regulation of multicellular organismal process	0.0563483351628247
GO:0031324	0.00790187970913065	1.26450818633816	120.018266303477	145	2574	negative regulation of cellular metabolic process	0.0563325563325563
GO:0071705	0.0180245367337023	1.25290812248875	95.2592533247877	115	2043	nitrogen compound transport	0.0562897699461576
GO:0051049	0.0273806327346556	1.24747828523396	82.0171446883512	99	1759	regulation of transport	0.0562819783968164
GO:0007399	0.0106063410049622	1.25889237582306	112.744431982054	136	2418	nervous system development	0.0562448304383788
GO:0010557	0.0305655348044691	1.23804432997831	84.2552475564813	101	1807	positive regulation of macromolecule biosynthetic process	0.0558937465412286
GO:0050793	0.0144503273019014	1.2429435483871	114.79602627784	137	2462	regulation of developmental process	0.0556458164094232
GO:0031328	0.0349475341598323	1.22396595627042	89.3842332959462	106	1917	positive regulation of cellular biosynthetic process	0.0552947313510694
GO:0032502	3.9903243838987e-05	1.32901795725449	295.989104310207	351	6348	developmental process	0.0552930056710775
GO:0031323	9.64263477150337e-05	1.31336424495171	277.757891363564	329	5957	regulation of cellular metabolic process	0.0552291421856639
GO:0051234	0.00106331123694945	1.27187342596165	217.562249639481	257	4666	establishment of localization	0.0550792970424346
GO:0007275	0.000723370753307341	1.27428390696975	239.896651177696	282	5145	multicellular organism development	0.0548104956268222
GO:0009891	0.0437558736792144	1.20882997936927	91.2026918763019	107	1956	positive regulation of biosynthetic process	0.0547034764826176
GO:0044260	7.38420677671556e-06	1.35469567464546	367.468514661112	430	7881	cellular macromolecule metabolic process	0.0545616038573785
GO:0048731	0.00180493341353697	1.25436403309392	223.34401538215	261	4790	system development	0.0544885177453027
GO:0051172	0.0311432354119697	1.20807891084278	112.231533408108	131	2407	negative regulation of nitrogen compound metabolic process	0.0544245949314499
GO:0048856	0.000624099989251634	1.27010952077189	267.080275596859	311	5728	anatomical structure development	0.0542946927374302
GO:0051716	3.72552821690476e-05	1.32208031130912	347.185707418683	404	7446	cellular response to stimulus	0.0542573193661026
GO:0051171	0.00108030089251329	1.25750094948728	259.573305560006	301	5567	regulation of nitrogen compound metabolic process	0.0540686186455901
GO:0044249	0.00160465611187825	1.24457103979452	267.872937029322	308	5745	cellular biosynthetic process	0.0536118363794604
GO:0080090	0.00183345762492901	1.24096251839519	267.453292741548	307	5736	regulation of primary metabolic process	0.0535216178521618
GO:0009653	0.0404427791147917	1.18518518518519	125.613523473802	144	2694	anatomical structure morphogenesis	0.0534521158129176
GO:0042221	0.00827490418666888	1.21154189864255	208.656465310046	239	4475	response to chemical	0.0534078212290503
GO:1901576	0.00214536345233762	1.23574634252166	270.996955616087	310	5812	organic substance biosynthetic process	0.053337921541638
GO:0048519	0.00241804616172012	1.23310607521134	267.639801313892	306	5740	negative regulation of biological process	0.0533101045296167
GO:0009058	0.00232244838071861	1.23260167775824	275.193398493831	314	5902	biosynthetic process	0.0532023043036259
GO:0006810	0.012213865155291	1.19741847485124	210.428296747316	239	4513	transport	0.0529581209838245
GO:0044237	1.15586985302629e-05	1.35762810682011	505.717993911232	566	10846	cellular metabolic process	0.0521851373778351
GO:0009059	0.0222273568492598	1.1716073584432	224.929338247076	251	4824	macromolecule biosynthetic process	0.0520315091210614
GO:0044271	0.0244883035237058	1.16951054412355	218.681301073546	244	4690	cellular nitrogen compound biosynthetic process	0.0520255863539446
GO:0034645	0.0260833664819667	1.16605966460724	222.87774395129	248	4780	cellular macromolecule biosynthetic process	0.0518828451882845
GO:0006807	0.000383735291206049	1.26933420497366	470.281365165839	519	10086	nitrogen compound metabolic process	0.0514574657941701
GO:0050896	0.00208038460333959	1.22283568225825	419.178016343535	461	8990	response to stimulus	0.0512791991101224
GO:0019222	0.0114857517378967	1.1771737419321	330.539817336965	363	7089	regulation of metabolic process	0.0512060939483707
GO:0044238	0.000687779183788989	1.25742611519417	493.967953853549	540	10594	primary metabolic process	0.0509722484425146
GO:0007165	0.0364330403512353	1.14338737399545	278.27078993751	303	5968	signal transduction	0.0507707774798928
GO:0023052	0.0440258816765226	1.13360575131526	301.024835763499	325	6456	signaling	0.0503407682775713
GO:0008152	0.00122284940263242	1.25827330109939	573.420605672168	615	12298	metabolic process	0.0500081314034802
GO:0071704	0.0118094693341768	1.18266916287777	550.153661272232	582	11799	organic substance metabolic process	0.0493262140859395
GO:0050794	0.0252776854858911	1.15275816624306	520.918442557282	549	11172	regulation of cellular process	0.049140708915145
GO:0009987	2.110195940035e-09	2.78325186519166	806.276558243871	847	17292	cellular process	0.0489821882951654
